# Supplementary material for: Application of starch-degradation bacteria in cigar tobacco leaf fermentation: effects on starch degradation, microbial communities and metabolic pathways
Source: Front Microbiol. 2025 Jul 21;16:1632731. doi: 10.3389/fmicb.2025.1632731 (PMC12319561; doi:10.3389/fmicb.2025.1632731)
Supplement: Supplementary file 1 [file Table_1.XLSX]

## Sheet: Sheet1
Alpha diversity index of bacteria after 18 days of fermentation						Alpha diversity index of bacteria after 35 days of fermentation
CK1	2075	1.83894	0.354057			CK1	2733	1.9443	0.316119
CK2	1960	1.74218	0.373047			CK2	2285	1.91913	0.316725
CK3	1803	1.74711	0.367879			CK3	3070	2.34085	0.203005
DX1	2010	2.0801	0.313647			DX1	6472	2.5574	0.278894
DX2	2076	2.13964	0.301705			DX2	15140	4.55909	0.049912
DX3	2433	2.36509	0.251343			DX3	3290	2.58053	0.251871
BLS1	2885	1.97215	0.319975			BLS1	4762	2.60182	0.186708
BLS2	5364	3.05855	0.133148			BLS2	6382	2.82693	0.173575
BLS3	5018	2.55299	0.221828			BLS3	4416	2.85991	0.146553
DX＋BLS1	2701	2.47412	0.176453			DX＋BLS1	5253	2.80055	0.16226
DX＋BLS2	2614	2.21099	0.259596			DX＋BLS2	4581	2.52283	0.195534
DX＋BLS3	2414	2.34378	0.197944			DX＋BLS3	5213	2.5685	0.206924
Alpha diversity index of fungi after 18 days of fermentation						Alpha diversity index of fungi after 35 days of fermentation
CK1	601	2.44447	0.184916			CK1	590	2.44478	0.220667
CK2	572	2.2392	0.20708			CK2	498	2.42782	0.214534
CK3	526	2.25441	0.208715			CK3	420	2.55033	0.173894
DX1	689	2.95087	0.148662			DX1	868	3.48286	0.093553
DX2	581	2.66415	0.235514			DX2	982	3.76979	0.065556
DX3	558	2.69201	0.148504			DX3	734	3.03515	0.138685
BLS1	834	2.96202	0.283949			BLS1	1010	2.51178	0.143069
BLS2	1119	2.89195	0.100451			BLS2	1022	2.76586	0.131164
BLS3	972	2.87163	0.101609			BLS3	1024	2.42233	0.136587
DX_BLS1	635	3.21151	0.202117			DX_BLS1	679	2.65403	0.123891
DX_BLS2	694	3.19102	0.186837			DX_BLS2	656	2.46373	0.101412
DX_BLS3	610	3.14062	0.191539			DX_BLS3	784	2.47228	0.238664
