# Supplementary material for: Application of starch-degradation bacteria in cigar tobacco leaf fermentation: effects on starch degradation, microbial communities and metabolic pathways
Source: Front Microbiol. 2025 Jul 21;16:1632731. doi: 10.3389/fmicb.2025.1632731 (PMC12319561; doi:10.3389/fmicb.2025.1632731)
Supplement: Supplementary file 2 [file Table_2.XLSX]

## Sheet: sheet 1
MS2_name	MS2_score	level	MS1_name	MS1_ppm	mzmed	rtmed	type	BLS_4	BLS_5	BLS_6	BLS_7	BLS_8	BLS_9	CK_4	CK_5	CK_6	CK_7	CK_8	CK_9	DX_4	DX_5	DX_6	DX_7	DX_8	DX_9	DX_BLS_4	DX_BLS_5	DX_BLS_6	DX_BLS_7	DX_BLS_8	DX_BLS_9	QC01	QC02	QC03	QC04
13,14-Dihydro-15-ketotetranorprostaglandin F1.beta.	3.95	level1			299.185	205.3	NEG	3.27684e+07	3.70023e+07	3.41726e+07	3.67527e+07	3.42811e+07	3.15304e+07	3.96714e+07	4.55821e+07	4.29184e+07	4.19621e+07	3.84446e+07	3.70721e+07	3.76028e+07	3.06764e+07	3.46129e+07	3.22588e+07	3.13806e+07	3.21757e+07	3.18816e+07	3.48368e+07	3.42396e+07	3.63311e+07	3.39036e+07	3.25989e+07	3.41024e+07	3.23958e+07	3.32809e+07	3.73614e+07
5Z,8Z,11Z-Eicosatrienoic acid	3.94	level1			305.248	314.1	NEG	1.79566e+07	1.77377e+07	1.78949e+07	1.54834e+07	1.82596e+07	1.85352e+07	1.66806e+07	2.03434e+07	1.90874e+07	1.90628e+07	2.20887e+07	1.61793e+07	2.27454e+07	2.02723e+07	2.10031e+07	1.95065e+07	1.93061e+07	2.24652e+07	1.67283e+07	1.5602e+07	1.69128e+07	1.98695e+07	1.59176e+07	1.78897e+07	1.72028e+07	1.81463e+07	1.87501e+07	1.92419e+07
Quillaic acid	3.94	level1			485.326	265.9	NEG	1.13222e+06	1.72406e+06	1.86374e+06	1.33972e+06	1.76057e+06	1.46765e+06	3.80793e+06	2.95675e+06	3.54488e+06	3.08436e+06	3.87779e+06	3.82399e+06	2.70061e+06	3.36817e+06	2.10561e+06	1.42368e+06	2.2256e+06	2.08837e+06	2.53789e+06	2.51894e+06	2.91609e+06	2.85825e+06	2.23972e+06	2.39275e+06	1.64465e+06	1.93545e+06	2.12147e+06	1.86577e+06
2-Hydroxystearic acid	3.93	level1			299.258	320.8	NEG	2.27294e+08	1.98939e+08	2.58542e+08	1.84009e+08	2.60733e+08	2.92033e+08	2.09164e+08	2.10807e+08	2.61685e+08	3.04464e+08	2.45185e+08	2.94295e+08	2.01148e+08	1.93247e+08	2.24365e+08	2.12332e+08	1.84661e+08	1.89476e+08	3.26838e+08	3.0064e+08	3.51953e+08	3.99925e+08	4.2544e+08	2.88142e+08	2.48439e+08	2.67673e+08	2.78613e+08	2.77771e+08
Octadecanedioic acid	3.93	level1			313.237	285	NEG	1.42632e+07	1.20569e+07	1.44388e+07	1.07004e+07	1.65903e+07	1.57821e+07	1.73253e+07	1.46575e+07	1.8635e+07	1.75484e+07	1.31307e+07	1.98017e+07	1.20091e+07	1.36975e+07	1.56937e+07	1.47252e+07	1.44742e+07	1.4625e+07	1.66075e+07	1.57103e+07	1.82481e+07	2.27208e+07	1.89516e+07	1.5767e+07	1.59318e+07	1.62276e+07	1.87254e+07	1.54248e+07
Asperphenamate	3.93	level1			507.226	257.3	POS	2.03181e+07	1.91699e+07	1.81378e+07	1.79381e+07	2.96089e+07	1.61861e+07	1.07929e+07	1.04353e+07	9.6404e+06	2.34611e+07	6.91625e+06	1.34197e+07	1.32343e+07	1.05626e+07	7.94649e+06	1.53328e+07	9.71147e+06	1.34032e+07	1.34052e+08	1.16389e+08	7.97723e+07	6.70398e+07	6.24028e+07	8.81376e+07	3.11324e+07	3.23792e+07	3.25859e+07	3.36894e+07
Narcissin	3.93	level1			623.16	186.2	NEG	1.64931e+06	1.78302e+06	1.24807e+06	1.51374e+06	2.37217e+06	2.06726e+06	1.7354e+06	1.56446e+06	1.1623e+06	2.2706e+06	2.06953e+06	1.38446e+06	1.47204e+06	1.4049e+06	2.39636e+06	4.47913e+06	2.41349e+06	1.74278e+06	1.4725e+06	1.42908e+06	2.67705e+06	1.39654e+06	1.48454e+06	1.55461e+06	1.78581e+06	1.59103e+06	1.94513e+06	2.01292e+06
5-Methoxyindole-3-acetic acid	3.93	level1			188.07	168.3	POS	5.43556e+07	5.84643e+07	4.63267e+07	5.36417e+07	4.77147e+07	4.95427e+07	6.05796e+07	5.90691e+07	6.25402e+07	4.46788e+07	5.39842e+07	4.73799e+07	5.84901e+07	6.80306e+07	5.92854e+07	6.1935e+07	5.95426e+07	7.15644e+07	5.42953e+07	4.48878e+07	5.12817e+07	7.29666e+07	6.35115e+07	6.89391e+07	5.48237e+07	5.88766e+07	5.67663e+07	5.62017e+07
cis-8,11,14-Eicosatrienoic acid	3.92	level1			305.248	314.1	NEG	1.79566e+07	1.77377e+07	1.78949e+07	1.54834e+07	1.82596e+07	1.85352e+07	1.66806e+07	2.03434e+07	1.90874e+07	1.90628e+07	2.20887e+07	1.61793e+07	2.27454e+07	2.02723e+07	2.10031e+07	1.95065e+07	1.93061e+07	2.24652e+07	1.67283e+07	1.5602e+07	1.69128e+07	1.98695e+07	1.59176e+07	1.78897e+07	1.72028e+07	1.81463e+07	1.87501e+07	1.92419e+07
Myristic acid	3.92	level1			227.201	306.8	NEG	2.46035e+08	2.72967e+08	2.4873e+08	2.42297e+08	2.75992e+08	2.66939e+08	2.39384e+08	2.4879e+08	2.62245e+08	2.51702e+08	2.38817e+08	2.11215e+08	2.19422e+08	2.29263e+08	2.24223e+08	2.24556e+08	2.29866e+08	1.97477e+08	2.09801e+08	2.41903e+08	2.27201e+08	1.8292e+08	1.6954e+08	1.75614e+08	2.17495e+08	2.2671e+08	2.309e+08	2.19859e+08
Arjunolic acid	3.92	level1			487.341	258.4	NEG	1.04488e+07	9.60053e+06	2.15875e+07	1.65807e+07	1.79484e+07	1.03161e+07	2.75518e+07	1.85062e+07	2.58492e+07	2.44179e+07	3.07765e+07	2.94592e+07	2.05361e+07	3.49632e+07	1.37981e+07	1.6069e+07	1.94447e+07	1.12251e+07	1.49949e+07	1.47075e+07	1.38975e+07	1.72603e+07	1.25495e+07	1.57075e+07	1.80073e+07	1.87679e+07	1.89099e+07	1.94315e+07
Undecanedioic acid	3.92	level1			197.118	230.1	NEG	4.27023e+07	4.66214e+07	3.78537e+07	4.45018e+07	3.74538e+07	4.33352e+07	3.86301e+07	3.70803e+07	5.08981e+07	4.45971e+07	3.74982e+07	3.76655e+07	3.78455e+07	3.79196e+07	4.7994e+07	4.70447e+07	4.81681e+07	4.30465e+07	4.85006e+07	5.56394e+07	5.63718e+07	3.29363e+07	3.59098e+07	3.20719e+07	4.19175e+07	4.06289e+07	4.24923e+07	4.21329e+07
(2R)-6-Oxo-2-piperidinecarboxylic acid	3.92	level1			142.05	26.7	NEG	4.17585e+07	4.56041e+07	5.30132e+07	4.48972e+07	4.32453e+07	4.52568e+07	3.63386e+07	3.49594e+07	4.29603e+07	4.13909e+07	3.69179e+07	3.98733e+07	3.05488e+07	3.0619e+07	2.77978e+07	3.78654e+07	3.86387e+07	3.29167e+07	2.79354e+07	2.88841e+07	2.94337e+07	3.14595e+07	3.14319e+07	3.79917e+07	3.47834e+07	3.70517e+07	3.41327e+07	3.75771e+07
Pentadecanoic acid	3.91	level1			241.217	314.1	NEG	4.73544e+08	4.82598e+08	4.81928e+08	4.86758e+08	4.87243e+08	4.97957e+08	4.47776e+08	4.68514e+08	5.16706e+08	5.0254e+08	4.98264e+08	4.41058e+08	4.00632e+08	3.59494e+08	3.41565e+08	3.77557e+08	3.76082e+08	2.94356e+08	3.91092e+08	3.93496e+08	4.46188e+08	4.36082e+08	4.27196e+08	4.23196e+08	4.10901e+08	4.37751e+08	4.56707e+08	4.53209e+08
gamma-Linolenic acid	3.91	level1			277.216	302.2	NEG	4.55677e+09	5.30708e+09	4.82007e+09	4.42736e+09	4.3844e+09	4.73562e+09	4.85042e+09	5.63198e+09	4.79481e+09	4.88062e+09	5.78094e+09	4.03666e+09	4.95044e+09	5.05025e+09	6.21209e+09	4.94449e+09	5.07275e+09	6.11077e+09	4.84029e+09	4.65048e+09	4.34123e+09	5.43155e+09	4.15645e+09	5.17398e+09	5.01766e+09	4.93513e+09	5.01929e+09	5.10808e+09
16-Hydroxypalmitic acid	3.91	level1			271.227	273.1	NEG	2.19162e+07	2.72855e+07	2.48703e+07	2.5177e+07	2.47901e+07	2.73991e+07	2.76002e+07	2.59424e+07	2.48389e+07	2.65867e+07	2.62755e+07	2.61072e+07	2.32501e+07	2.04056e+07	2.56807e+07	2.42389e+07	2.28626e+07	2.08137e+07	2.51674e+07	2.62207e+07	2.69661e+07	2.32924e+07	2.49793e+07	2.37398e+07	2.67648e+07	6.54324e+07	2.45255e+07	2.90421e+07
Shogaol	3.91	level1			277.179	254.1	POS	4.47306e+07	4.72416e+07	4.35598e+07	7.28021e+07	5.86238e+07	7.03377e+07	4.72138e+07	4.66079e+07	1.91002e+07	4.79963e+07	4.76827e+07	1.98324e+07	3.9536e+07	2.10405e+07	4.63667e+07	4.45865e+07	1.991e+07	4.29993e+07	6.07281e+07	5.86498e+07	5.32928e+07	6.25918e+07	4.47817e+07	4.6331e+07	4.94161e+07	4.83995e+07	3.49838e+07	5.12709e+07
Quercetin	3.91	level1			301.034	207.9	NEG	1.29371e+06	3.48078e+06	3.16357e+06	3.79591e+06	4.60599e+06	1.15655e+06	8.26505e+06	1.85897e+07	3.6271e+06	1.68936e+07	5.05295e+07	3.08574e+06	5.56383e+06	2.72866e+06	2.20648e+07	3.61809e+07	3.91086e+07	9.27495e+06	9.11922e+06	1.2579e+07	1.67128e+07	1.83355e+07	6.1389e+06	1.89967e+07	9.93798e+06	1.06705e+07	1.06445e+07	1.15419e+07
Royal jelly acid	3.91	level1			185.118	204.7	NEG	2.10198e+07	2.30438e+07	2.4082e+07	2.17037e+07	2.23834e+07	2.47511e+07	2.87474e+07	2.89032e+07	3.59512e+07	3.23819e+07	2.6976e+07	2.8309e+07	2.54292e+07	2.86971e+07	6.8825e+07	2.27426e+07	2.27174e+07	2.38864e+07	2.63695e+07	2.64018e+07	2.47884e+07	2.31427e+07	2.19846e+07	2.11547e+07	2.48024e+07	2.44379e+07	2.52724e+07	2.6027e+07
3',4'-Dihydroxyacetophenone	3.91	level1			151.04	161.5	NEG	1.7245e+08	1.93592e+08	2.21885e+08	1.75271e+08	1.78164e+08	1.58151e+08	2.48223e+08	2.56715e+08	2.47085e+08	2.51489e+08	2.68074e+08	2.58394e+08	2.31486e+08	2.66308e+08	1.87439e+08	1.58568e+08	1.94499e+08	2.49485e+08	1.95929e+08	1.39772e+08	1.22208e+08	2.6081e+08	2.21975e+08	3.16087e+08	2.12991e+08	2.09422e+08	2.11924e+08	2.12518e+08
2-Hydroxy-2-methylbutyric acid	3.91	level1			117.055	46.8	NEG	1.45392e+07	1.36222e+07	2.49501e+07	1.58982e+07	1.2508e+07	5.43333e+06	2.16099e+07	3.24384e+07	3.26907e+07	1.44321e+07	2.04787e+07	1.51086e+07	2.86815e+07	3.27055e+07	1.25181e+07	1.50942e+07	1.37046e+07	2.80751e+07	1.68855e+07	2.01271e+07	1.39177e+07	7.59682e+06	1.44264e+07	1.2118e+07	1.55214e+07	1.76308e+07	1.51464e+07	1.83668e+07
12-Methyltridecanoic acid	3.9	level1			227.201	306.8	NEG	2.46035e+08	2.72967e+08	2.4873e+08	2.42297e+08	2.75992e+08	2.66939e+08	2.39384e+08	2.4879e+08	2.62245e+08	2.51702e+08	2.38817e+08	2.11215e+08	2.19422e+08	2.29263e+08	2.24223e+08	2.24556e+08	2.29866e+08	1.97477e+08	2.09801e+08	2.41903e+08	2.27201e+08	1.8292e+08	1.6954e+08	1.75614e+08	2.17495e+08	2.2671e+08	2.309e+08	2.19859e+08
alpha-Linolenic acid	3.9	level1			277.216	302.2	NEG	4.55677e+09	5.30708e+09	4.82007e+09	4.42736e+09	4.3844e+09	4.73562e+09	4.85042e+09	5.63198e+09	4.79481e+09	4.88062e+09	5.78094e+09	4.03666e+09	4.95044e+09	5.05025e+09	6.21209e+09	4.94449e+09	5.07275e+09	6.11077e+09	4.84029e+09	4.65048e+09	4.34123e+09	5.43155e+09	4.15645e+09	5.17398e+09	5.01766e+09	4.93513e+09	5.01929e+09	5.10808e+09
DEHP	3.9	level1			391.283	308.1	POS	1.89686e+08	1.87543e+08	1.8836e+08	1.8768e+08	1.79244e+08	1.71472e+08	1.83892e+08	1.88626e+08	2.10088e+08	1.72082e+08	1.95333e+08	1.73383e+08	1.65328e+08	1.76409e+08	1.37702e+08	1.52619e+08	1.52471e+08	1.63271e+08	1.6963e+08	1.7287e+08	1.73758e+08	1.53571e+08	1.54219e+08	1.7864e+08	1.70826e+08	1.84252e+08	1.61084e+08	1.49806e+08
Dodecanoic acid	3.9	level1			199.169	290.3	NEG	3.37756e+07	3.22055e+07	3.13451e+07	2.66733e+07	3.18067e+07	3.52175e+07	2.95699e+07	3.13033e+07	3.26359e+07	3.31147e+07	2.94387e+07	3.34072e+07	3.09126e+07	2.95464e+07	3.18336e+07	3.36516e+07	3.46672e+07	2.93741e+07	3.46684e+07	3.57857e+07	3.77212e+07	2.98082e+07	2.84518e+07	3.01016e+07	3.2867e+07	3.22241e+07	3.06373e+07	3.22054e+07
Undecanoic acid	3.9	level1			185.154	281.1	NEG	2.41728e+07	2.24906e+07	2.04765e+07	2.32815e+07	2.40157e+07	2.60181e+07	2.23674e+07	2.19364e+07	2.44756e+07	2.27427e+07	2.10263e+07	2.2925e+07	2.03591e+07	2.22718e+07	2.23008e+07	2.21963e+07	2.27931e+07	2.00545e+07	2.34575e+07	2.35443e+07	2.42499e+07	2.20421e+07	2.04681e+07	2.09701e+07	2.32855e+07	2.3282e+07	2.19704e+07	2.13558e+07
2',4'-Dihydroxyacetophenone	3.9	level1			151.04	190	NEG	1.53423e+07	1.58561e+07	1.61279e+07	1.63291e+07	1.52939e+07	1.48712e+07	1.51069e+07	1.68096e+07	1.80606e+07	1.88584e+07	1.89142e+07	1.68388e+07	1.80767e+07	1.25766e+07	1.64205e+07	1.48015e+07	1.32804e+07	1.06446e+07	9.67434e+06	7.78774e+06	8.63325e+06	1.13599e+07	9.75392e+06	1.13368e+07	1.34849e+07	1.40043e+07	1.4505e+07	1.36236e+07
2,5-Dihydroxyacetophenone	3.9	level1			151.04	190	NEG	1.53423e+07	1.58561e+07	1.61279e+07	1.63291e+07	1.52939e+07	1.48712e+07	1.51069e+07	1.68096e+07	1.80606e+07	1.88584e+07	1.89142e+07	1.68388e+07	1.80767e+07	1.25766e+07	1.64205e+07	1.48015e+07	1.32804e+07	1.06446e+07	9.67434e+06	7.78774e+06	8.63325e+06	1.13599e+07	9.75392e+06	1.13368e+07	1.34849e+07	1.40043e+07	1.4505e+07	1.36236e+07
Salicylic acid	3.9	level1			137.024	167	NEG	5.5213e+07	5.42184e+07	4.71122e+07	4.15699e+07	6.81893e+07	6.52044e+07	3.41199e+07	3.71787e+07	3.72245e+07	4.99052e+07	3.86179e+07	3.44406e+07	4.38379e+07	4.27311e+07	6.26702e+07	8.02988e+07	7.66367e+07	8.16045e+07	1.0842e+08	1.52482e+08	1.68274e+08	5.0796e+07	5.19555e+07	5.06926e+07	6.35802e+07	6.14699e+07	6.30126e+07	6.47109e+07
Myosmine	3.9	level1			147.091	37.6	POS	2.34195e+08	1.97709e+08	1.76495e+08	1.8299e+08	2.46614e+08	2.20279e+08	2.36131e+08	4.1789e+08	1.94146e+08	2.68007e+08	2.69451e+08	2.09256e+08	4.65482e+08	4.75948e+08	5.53502e+08	5.8995e+08	5.13815e+08	7.37677e+08	4.66447e+08	4.0493e+08	5.04802e+08	5.638e+08	5.16791e+08	3.29614e+08	3.65867e+08	3.70034e+08	3.6237e+08	3.61893e+08
5-Acetyluracil	3.9	level1			153.03	32.7	NEG	3.93278e+06	4.51258e+06	1.57096e+06	4.12139e+06	4.73936e+06	5.01956e+06	5.48654e+06	4.7623e+06	4.91905e+06	3.32332e+06	3.78842e+06	5.60225e+06	5.64936e+06	4.85515e+06	2.32532e+06	3.40781e+06	5.95004e+06	6.59424e+06	4.69438e+06	4.0574e+06	4.49117e+06	6.89271e+06	5.07488e+06	8.66596e+06	3.98118e+06	4.52129e+06	3.17607e+06	7.19038e+06
Euscaphic acid	3.89	level1			487.341	258.4	NEG	1.04488e+07	9.60053e+06	2.15875e+07	1.65807e+07	1.79484e+07	1.03161e+07	2.75518e+07	1.85062e+07	2.58492e+07	2.44179e+07	3.07765e+07	2.94592e+07	2.05361e+07	3.49632e+07	1.37981e+07	1.6069e+07	1.94447e+07	1.12251e+07	1.49949e+07	1.47075e+07	1.38975e+07	1.72603e+07	1.25495e+07	1.57075e+07	1.80073e+07	1.87679e+07	1.89099e+07	1.94315e+07
2-Hydroxymethyl benzoic acid	3.89	level1			151.04	161.5	NEG	1.7245e+08	1.93592e+08	2.21885e+08	1.75271e+08	1.78164e+08	1.58151e+08	2.48223e+08	2.56715e+08	2.47085e+08	2.51489e+08	2.68074e+08	2.58394e+08	2.31486e+08	2.66308e+08	1.87439e+08	1.58568e+08	1.94499e+08	2.49485e+08	1.95929e+08	1.39772e+08	1.22208e+08	2.6081e+08	2.21975e+08	3.16087e+08	2.12991e+08	2.09422e+08	2.11924e+08	2.12518e+08
2-Hydroxypalmitic acid	3.89	level1			271.227	290.7	NEG	3.71189e+07	4.71683e+07	4.05394e+07	3.79014e+07	4.05589e+07	4.64861e+07	4.59677e+07	4.19906e+07	2.99552e+07	4.18928e+07	4.54199e+07	3.97438e+07	4.04824e+07	2.77734e+07	5.24835e+07	3.91713e+07	3.79093e+07	4.68873e+07	3.9575e+07	3.91088e+07	4.20616e+07	4.48745e+07	4.33948e+07	3.93743e+07	4.76027e+07	4.41266e+07	3.64147e+07	4.80899e+07
Capric acid	3.89	level1			171.138	271.1	NEG	1.54824e+07	1.31675e+07	1.14647e+07	1.38216e+07	1.30351e+07	1.67695e+07	1.31553e+07	1.31599e+07	1.58277e+07	1.35833e+07	1.24266e+07	1.25484e+07	1.22855e+07	1.37486e+07	1.50745e+07	1.58939e+07	1.60417e+07	1.39933e+07	1.7684e+07	1.70834e+07	1.78001e+07	1.39988e+07	1.3025e+07	1.25303e+07	1.45525e+07	1.40099e+07	1.32201e+07	1.41128e+07
13(S)-HpOTrE	3.89	level1			291.196	267.8	NEG	4.16367e+07	5.37758e+07	4.25745e+07	4.40317e+07	2.68995e+07	3.32348e+07	3.216e+07	3.25029e+07	3.45119e+07	3.40204e+07	3.84645e+07	2.90241e+07	3.26699e+07	3.09761e+07	5.5444e+07	2.54741e+07	3.8755e+07	4.88071e+07	2.76075e+07	2.2349e+07	1.9909e+07	2.91211e+07	2.91045e+07	4.52804e+07	3.13018e+07	3.50697e+07	3.18832e+07	4.23755e+07
17alpha-Hydroxypregnenolone	3.89	level1			391.248	250	NEG	1.5431e+06	2.32335e+06	2.0348e+06	2.99627e+06	2.87475e+06	3.90144e+06	3.20915e+06	4.06676e+06	1.18657e+07	3.41419e+06	3.14204e+06	2.64232e+06	2.25615e+06	2.87712e+06	2.76102e+06	1.26461e+06	2.01496e+06	3.36849e+06	1.0984e+06	2.2779e+06	2.40253e+06	2.66726e+06	2.31249e+06	2.96402e+06	3.00192e+06	1.99624e+06	3.50037e+06	3.41009e+06
3',5'-Dimethoxy-4'-hydroxyacetophenone	3.89	level1			195.065	174	NEG	1.31355e+07	7.91264e+06	7.28755e+06	8.18724e+06	8.65786e+06	6.90731e+06	9.22472e+06	9.48393e+06	8.32656e+06	8.83912e+06	7.17257e+06	1.70145e+07	5.69219e+06	6.49475e+06	5.83062e+06	6.45602e+06	1.1322e+07	6.00512e+06	4.57705e+06	6.76353e+06	5.07516e+06	5.69829e+06	1.20237e+07	1.03588e+07	1.10904e+07	7.14078e+06	7.98769e+06	6.79601e+06
gamma-Glutamylphenylalanine	3.89	level1			295.127	103	POS	1.70148e+07	1.62308e+07	7.27335e+06	2.38324e+07	2.88967e+07	9.77035e+06	7.74106e+06	1.41247e+07	3.33703e+06	1.15689e+07	1.64497e+07	3.45448e+06	5.71549e+06	4.65049e+06	1.53633e+07	4.08478e+06	1.89767e+07	1.08033e+07	4.7414e+06	1.25715e+07	5.70518e+06	1.68474e+07	3.47517e+07	1.27445e+07	5.10348e+06	1.17961e+07	1.19828e+07	1.11267e+07
3-Hydorxy-3-methylglutaric acid	3.89	level1			161.045	28	NEG	3.82678e+07	3.96541e+07	4.18329e+07	3.38023e+07	3.85264e+07	3.80016e+07	4.04254e+07	4.28056e+07	3.80668e+07	4.68634e+07	4.14216e+07	4.16043e+07	3.99525e+07	4.34947e+07	4.70613e+07	3.90498e+07	3.81763e+07	4.68473e+07	3.86984e+07	3.98978e+07	3.86152e+07	4.24549e+07	3.67161e+07	4.32612e+07	3.83728e+07	4.02085e+07	3.87454e+07	4.06735e+07
cis-9-Palmitoleic acid	3.88	level1			253.216	309.5	NEG	1.91941e+08	1.65095e+08	1.91907e+08	1.59762e+08	1.84931e+08	1.85656e+08	1.82715e+08	2.04586e+08	2.17849e+08	2.13374e+08	1.67279e+08	1.94668e+08	1.57143e+08	1.57273e+08	1.75431e+08	1.83016e+08	1.89919e+08	1.66177e+08	1.78188e+08	2.37084e+08	1.91347e+08	1.49862e+08	1.32045e+08	1.83425e+08	1.75207e+08	1.84118e+08	1.81626e+08	1.77157e+08
NAE(18:3(6Z,9Z,12Z))	3.88	level1			322.273	285.7	POS	1.08653e+07	1.33904e+07	1.25237e+07	1.26812e+07	1.48449e+07	1.24098e+07	1.63156e+07	1.8569e+07	1.69657e+07	1.68921e+07	2.12448e+07	1.27125e+07	1.19458e+07	1.15774e+07	9.86207e+06	1.01426e+07	1.17342e+07	1.09921e+07	1.15606e+07	1.021e+07	9.8336e+06	1.74669e+07	1.41907e+07	1.65363e+07	1.22938e+07	1.44925e+07	1.32547e+07	1.47913e+07
Valproic acid	3.88	level1			143.107	248.8	NEG	8.69953e+06	9.02498e+06	6.0382e+06	7.81707e+06	8.90456e+06	9.09418e+06	1.0344e+07	6.24881e+06	7.65092e+06	7.50754e+06	7.89331e+06	7.51492e+06	8.27896e+06	7.55881e+06	8.13769e+06	9.90092e+06	9.78089e+06	9.15177e+06	1.0557e+07	9.463e+06	9.14899e+06	8.38499e+06	6.78584e+06	7.82492e+06	9.97808e+06	1.0833e+07	1.07248e+07	1.09097e+07
1,3-Dicyclohexylurea	3.88	level1			225.195	243.5	POS	4.57127e+07	4.70326e+07	4.65452e+07	4.79227e+07	4.71929e+07	4.94509e+07	4.66453e+07	4.8732e+07	4.73208e+07	4.59049e+07	4.97891e+07	4.7342e+07	4.90948e+07	4.7604e+07	4.73146e+07	4.77427e+07	4.66674e+07	4.64146e+07	4.91586e+07	4.89862e+07	4.91545e+07	4.80713e+07	4.7233e+07	4.58743e+07	4.69568e+07	4.84825e+07	4.75916e+07	4.83691e+07
Traumatic acid	3.88	level1			227.128	228.8	NEG	5.5516e+07	5.68031e+07	4.00194e+07	4.884e+07	4.12035e+07	4.71577e+07	4.74451e+07	4.54347e+07	5.50341e+07	4.69557e+07	4.38432e+07	3.71005e+07	3.30906e+07	3.38324e+07	3.93503e+07	3.07034e+07	3.66423e+07	2.93087e+07	3.47062e+07	3.1215e+07	3.31841e+07	3.57881e+07	3.37192e+07	3.35929e+07	4.23402e+07	3.98889e+07	4.01963e+07	4.04326e+07
Pinoresinol	3.88	level1			357.133	196	NEG	0	0	1.64917e+06	906371	911235	0	3.97256e+06	3.5425e+06	2.95766e+06	2.68746e+06	4.36306e+06	3.33678e+06	0	2.33206e+06	0	919457	970645	0	0	0	0	650330	0	812710	1.53013e+06	2.17539e+06	2.00957e+06	0
Kaempferol 3-neohesperidoside	3.88	level1			595.162	187.3	POS	1.70554e+07	2.48724e+07	1.18066e+07	1.61573e+07	3.36917e+07	2.46049e+07	2.18724e+07	1.7959e+07	8.65018e+06	1.68616e+07	1.95325e+07	1.39431e+07	1.87949e+07	2.38463e+07	3.85e+07	6.03121e+07	5.98847e+07	2.14277e+07	3.46437e+07	3.95405e+07	6.75413e+07	2.93759e+07	2.95175e+07	2.58303e+07	2.77877e+07	2.88253e+07	2.8148e+07	2.96998e+07
Phenylpyruvic acid	3.88	level1			163.039	170.3	NEG	2.33794e+08	2.47918e+08	2.41132e+08	2.24193e+08	2.42406e+08	2.54597e+08	2.46496e+08	2.57506e+08	2.93729e+08	2.81731e+08	2.67561e+08	2.25455e+08	2.21271e+08	2.26458e+08	2.06123e+08	2.38585e+08	2.28394e+08	2.29008e+08	2.455e+08	2.32586e+08	2.3823e+08	2.61757e+08	2.51702e+08	2.58172e+08	2.48866e+08	2.42808e+08	2.45185e+08	2.51401e+08
Indole-3-acetamide	3.88	level1			173.071	165.7	NEG	1.32136e+07	1.30923e+07	1.07634e+07	1.25979e+07	9.61522e+06	1.18189e+07	1.23098e+07	1.52881e+07	1.42483e+07	1.59565e+07	1.30183e+07	1.24631e+07	6.90659e+06	6.09071e+06	5.26725e+06	4.04473e+06	4.87933e+06	7.02203e+06	1.21609e+07	1.42711e+07	1.07498e+07	8.02826e+06	7.93798e+06	1.22363e+07	8.68696e+06	9.99618e+06	8.84108e+06	8.48491e+06
Actarit	3.88	level1			192.066	153.1	NEG	2.83476e+08	2.39587e+08	2.12459e+08	2.08236e+08	1.86414e+08	2.23005e+08	2.27857e+08	2.96187e+08	2.12306e+08	2.66423e+08	2.14291e+08	1.9918e+08	1.44209e+08	9.36071e+07	1.5049e+08	7.87823e+07	1.17465e+08	1.51916e+08	1.68507e+08	1.32859e+08	1.31395e+08	2.8089e+08	2.53963e+08	2.78756e+08	1.9425e+08	1.89167e+08	1.91033e+08	1.95508e+08
Acetylleucine	3.88	level1			172.097	133.4	NEG	2.41953e+07	2.11322e+07	2.05022e+07	2.65243e+07	2.29583e+07	1.50553e+07	2.19799e+07	2.3768e+07	2.14694e+07	2.3216e+07	1.98521e+07	2.47292e+07	2.11993e+07	2.21899e+07	2.14856e+07	2.2417e+07	2.71643e+07	2.64132e+07	2.69276e+07	2.71831e+07	2.30675e+07	2.79115e+07	2.69757e+07	2.82694e+07	2.27374e+07	2.38766e+07	2.8307e+07	2.31637e+07
Citramalic acid	3.88	level1			147.029	26.6	NEG	4.99573e+07	5.15138e+07	5.55909e+07	3.93809e+07	5.23409e+07	5.50504e+07	4.35654e+07	3.40864e+07	3.9834e+07	4.77989e+07	3.94046e+07	5.72234e+07	4.70702e+07	4.8106e+07	5.97808e+07	6.47688e+07	5.487e+07	6.1885e+07	7.94463e+07	8.96709e+07	8.69863e+07	6.83897e+07	7.15272e+07	5.41031e+07	5.38061e+07	4.86142e+07	5.08436e+07	5.59242e+07
2-Hydroxyhexanedioic acid	3.87	level1			161.045	28	NEG	3.82678e+07	3.96541e+07	4.18329e+07	3.38023e+07	3.85264e+07	3.80016e+07	4.04254e+07	4.28056e+07	3.80668e+07	4.68634e+07	4.14216e+07	4.16043e+07	3.99525e+07	4.34947e+07	4.70613e+07	3.90498e+07	3.81763e+07	4.68473e+07	3.86984e+07	3.98978e+07	3.86152e+07	4.24549e+07	3.67161e+07	4.32612e+07	3.83728e+07	4.02085e+07	3.87454e+07	4.06735e+07
Caprylic acid	3.87	level1			143.107	248.8	NEG	8.69953e+06	9.02498e+06	6.0382e+06	7.81707e+06	8.90456e+06	9.09418e+06	1.0344e+07	6.24881e+06	7.65092e+06	7.50754e+06	7.89331e+06	7.51492e+06	8.27896e+06	7.55881e+06	8.13769e+06	9.90092e+06	9.78089e+06	9.15177e+06	1.0557e+07	9.463e+06	9.14899e+06	8.38499e+06	6.78584e+06	7.82492e+06	9.97808e+06	1.0833e+07	1.07248e+07	1.09097e+07
cis-11.14-Eicosadienoic acid	3.87	level1			307.263	324.6	NEG	5.82872e+06	3.22948e+06	4.78701e+06	3.94732e+06	4.39896e+06	3.64026e+06	3.61085e+06	5.52081e+06	6.46897e+06	4.87164e+06	6.58281e+06	4.52222e+06	5.61395e+06	4.55382e+06	4.02434e+06	4.68425e+06	4.43178e+06	6.30202e+06	4.33016e+06	4.12177e+06	4.8392e+06	5.23248e+06	5.53391e+06	5.22076e+06	3.2942e+06	3.89496e+06	5.34481e+06	6.23048e+06
7-Ketocholesterol	3.87	level1			383.329	307.5	POS	1.05008e+07	1.09368e+07	9.06103e+06	1.14354e+07	1.27675e+07	1.49401e+07	1.18857e+07	5.35092e+06	6.84675e+06	1.07737e+07	8.38254e+06	1.00367e+07	8.19196e+06	3.1836e+06	5.06293e+06	1.128e+07	7.39135e+06	8.25844e+06	1.32944e+07	1.25627e+07	8.4476e+06	1.85494e+07	1.33467e+07	1.00017e+07	1.143e+07	1.83172e+07	7.6463e+06	1.54776e+07
Pomolic acid	3.87	level1			471.347	285	NEG	2.11319e+07	1.35873e+07	4.92152e+07	4.04308e+07	4.52275e+07	2.0896e+07	3.71369e+07	2.1992e+07	2.51655e+07	2.19969e+07	4.50192e+07	4.09856e+07	1.14633e+07	6.60283e+07	8.79003e+06	1.92659e+07	3.73082e+07	1.04689e+07	2.08283e+07	2.15356e+07	1.35451e+07	2.21674e+07	1.09562e+07	2.235e+07	2.55454e+07	2.8705e+07	2.63224e+07	2.52847e+07
Hexylresorcinol	3.87	level1			193.122	261.2	NEG	3.21506e+06	3.48276e+06	3.11305e+06	3.16839e+06	2.99031e+06	3.39294e+06	3.23527e+06	3.26353e+06	3.71218e+06	3.96343e+06	3.55704e+06	3.13188e+06	2.84837e+06	2.76622e+06	3.04152e+06	2.70779e+06	3.18918e+06	2.94426e+06	3.11026e+06	3.10592e+06	3.16216e+06	3.36487e+06	2.90971e+06	3.26726e+06	2.82004e+06	3.00046e+06	3.17082e+06	2.99604e+06
Pelargonic acid	3.87	level1			157.123	260.6	NEG	9.4008e+07	8.6974e+07	5.88868e+07	9.35226e+07	9.17539e+07	1.13137e+08	1.09478e+08	7.76563e+07	1.06862e+08	9.81236e+07	7.14071e+07	8.44386e+07	6.60228e+07	9.37847e+07	8.90702e+07	9.03111e+07	9.00491e+07	9.20717e+07	9.89079e+07	8.83494e+07	9.21065e+07	1.05902e+08	5.77741e+07	8.30224e+07	8.85e+07	8.71939e+07	9.15947e+07	9.08009e+07
Prostaglandin B2 (PGB2)	3.87	level1			333.206	244.2	NEG	1.06313e+07	1.26597e+07	1.13803e+07	1.68747e+07	8.18055e+06	1.08617e+07	1.09146e+07	4.95831e+07	1.43349e+07	1.01721e+07	9.20008e+06	1.16305e+07	1.09894e+07	1.26947e+07	1.72413e+07	1.45908e+07	2.81435e+07	1.48163e+07	9.23768e+06	4.58728e+07	1.10344e+07	3.71085e+07	9.41671e+06	1.28168e+07	1.1684e+07	1.13703e+07	1.21012e+07	1.14033e+07
3-Phenoxybenzoic acid	3.87	level1			213.054	241.5	NEG	1.50401e+07	1.88568e+07	1.56238e+07	1.22691e+07	5.25652e+06	1.49212e+07	3.00718e+06	2.6184e+06	3.01649e+06	2.33329e+06	2.14422e+06	2.07852e+06	2.3755e+07	2.58597e+07	1.12568e+07	4.15451e+07	2.65157e+07	1.96403e+07	9.9716e+06	7.07548e+06	4.35497e+06	5.98909e+06	4.87976e+06	1.18132e+07	1.15972e+07	1.11609e+07	1.11536e+07	1.15656e+07
(-)-Camphoric acid	3.87	level1			199.097	205.2	NEG	2.21337e+08	2.16521e+08	2.16639e+08	1.95094e+08	1.93454e+08	2.47362e+08	2.04874e+08	1.82862e+08	2.36992e+08	2.24304e+08	2.26399e+08	2.12837e+08	2.31724e+08	2.78738e+08	2.94163e+08	2.57632e+08	2.35241e+08	2.4103e+08	2.24217e+08	2.27847e+08	2.56053e+08	1.91449e+08	1.77651e+08	1.44318e+08	2.21542e+08	2.20325e+08	2.20816e+08	2.22445e+08
p-Toluquinone	3.87	level1			121.029	192.2	NEG	1.62918e+08	1.45725e+08	1.41767e+08	1.39128e+08	1.15274e+08	1.75344e+08	1.15541e+08	1.56085e+08	1.73443e+08	1.4579e+08	1.16096e+08	1.00328e+08	9.00817e+07	9.35673e+07	1.04615e+08	8.62637e+07	1.09065e+08	1.71565e+08	1.77653e+08	2.04041e+08	2.41695e+08	1.208e+08	1.29539e+08	1.01962e+08	1.40391e+08	1.33074e+08	1.35427e+08	1.33239e+08
ESCULETIN	3.87	level1			177.018	156.4	NEG	4.16423e+06	7.35789e+06	6.25736e+06	6.44727e+06	9.58528e+06	5.2699e+06	1.18581e+07	1.38122e+07	9.7445e+06	1.29651e+07	2.08494e+07	1.12006e+07	1.53264e+07	1.41051e+07	1.97343e+07	2.08884e+07	1.81441e+07	1.46035e+07	8.99269e+06	8.74659e+06	5.8794e+06	1.13131e+07	9.85751e+06	1.42462e+07	1.27776e+07	1.216e+07	1.1401e+07	1.1831e+07
Carbendazim	3.87	level1			192.076	154.7	POS	6.30932e+09	7.19878e+09	3.64936e+09	7.08411e+09	2.43395e+09	7.41116e+09	6.23938e+06	5.55088e+06	6.04279e+06	6.08934e+06	6.56855e+06	5.93965e+06	2.54837e+07	6.92331e+06	6.83179e+06	6.56813e+06	7.18856e+06	6.36243e+06	7.5773e+06	2.95009e+06	2.34512e+06	4.10032e+06	7.14409e+06	3.0198e+06	1.44431e+09	1.40658e+09	1.42923e+09	1.42248e+09
Phenylacetylglycine	3.87	level1			194.08	141.8	POS	1.87428e+07	2.02448e+07	1.93088e+07	2.01626e+07	4.24168e+07	1.74616e+07	1.21017e+07	9.20485e+06	1.27152e+07	1.02529e+07	2.42906e+07	1.16994e+07	9.88044e+06	9.26893e+06	8.68831e+06	9.69957e+06	1.10905e+07	8.27626e+06	6.33598e+06	5.25147e+06	5.12912e+06	8.70437e+06	9.03686e+06	1.06654e+07	1.17793e+07	1.17007e+07	1.1943e+07	1.18472e+07
2-Hydroxyphenylacetic acid	3.87	level1			151.04	141.8	NEG	2.35591e+07	2.91002e+07	2.93881e+07	2.56265e+07	2.31186e+07	2.4761e+07	3.29019e+07	3.4695e+07	3.95635e+07	3.37116e+07	4.22709e+07	3.64986e+07	2.36906e+07	1.92538e+07	1.89876e+07	1.09633e+07	1.75393e+07	1.8927e+07	1.15974e+07	1.22713e+07	1.02619e+07	1.4408e+07	1.18832e+07	1.63845e+07	2.39127e+07	2.38379e+07	2.36513e+07	2.35627e+07
Maculosin	3.87	level1			261.123	141	POS	8.44794e+06	9.08084e+06	9.9867e+06	8.4481e+06	9.50928e+06	9.51948e+06	1.52546e+07	1.3094e+07	1.73305e+07	1.70302e+07	1.98222e+07	7.31004e+06	1.18596e+07	1.70333e+07	1.13408e+07	1.15134e+07	1.19712e+07	1.77081e+07	1.82215e+07	1.39193e+07	1.66707e+07	1.78149e+07	1.18337e+07	1.21556e+07	1.92078e+07	1.08475e+07	1.06984e+07	1.11595e+07
Antipyrine (Phenazone)	3.87	level1			189.101	136.9	POS	6.96854e+07	4.39434e+07	8.25199e+07	3.30808e+07	3.07957e+07	3.72283e+07	2.82423e+07	6.48909e+07	9.00665e+07	8.1768e+07	7.77592e+07	2.98102e+07	7.96916e+07	3.27499e+07	3.23094e+07	3.96527e+07	9.33642e+07	3.35918e+07	3.88711e+07	4.36728e+07	5.6564e+07	3.38467e+07	4.10449e+07	3.30209e+07	8.15566e+07	3.42842e+07	3.88208e+07	3.53233e+07
Aminohippuric acid	3.87	level1			193.061	39.2	NEG	7.20449e+06	6.78503e+06	1.4229e+07	7.24498e+06	1.82698e+07	6.1983e+06	7.53354e+06	1.01641e+07	8.66126e+06	9.06476e+06	8.0486e+06	7.77446e+06	1.31311e+07	2.66104e+07	1.9341e+07	1.47365e+07	1.67105e+07	1.43929e+07	1.08678e+07	8.38584e+06	9.72766e+06	1.30075e+07	1.26762e+07	1.35097e+07	9.81097e+06	9.97693e+06	1.03893e+07	1.02657e+07
Acetylproline	3.87	level1			156.066	37.2	NEG	1.44278e+07	1.25904e+07	1.41964e+07	1.21123e+07	1.17801e+07	1.23895e+07	1.20479e+07	1.21249e+07	1.44976e+07	1.34593e+07	1.26064e+07	1.27466e+07	1.3812e+07	1.64729e+07	1.35744e+07	1.36715e+07	4.36795e+07	1.48599e+07	1.52005e+07	4.77214e+07	4.43055e+07	1.49208e+07	1.28943e+07	1.57049e+07	1.34249e+07	1.35648e+07	1.38438e+07	1.39023e+07
Phenylalanine	3.87	level1			166.085	36.8	POS	6.38295e+08	8.13226e+08	5.21016e+08	1.00289e+09	4.53047e+08	5.10269e+08	7.63794e+08	1.01273e+09	4.51597e+08	7.35663e+08	5.91686e+08	4.83264e+08	4.32488e+08	3.83703e+08	5.62994e+08	2.64475e+08	4.67942e+08	5.96373e+08	4.16499e+08	2.98488e+08	2.88687e+08	9.47383e+08	9.13862e+08	7.90534e+08	6.86481e+08	6.65624e+08	6.04002e+08	6.34995e+08
1-Methylpyrrolidine	3.87	level1			86.0959	25	POS	2.99122e+07	2.61336e+07	2.49596e+07	2.74528e+07	2.28636e+07	2.94153e+07	1.79928e+07	2.21981e+07	1.95074e+07	1.68504e+07	1.4903e+07	1.59268e+07	2.16241e+07	2.23311e+07	2.10474e+07	2.00181e+07	2.2664e+07	2.80502e+07	1.99648e+07	2.12916e+07	2.2768e+07	2.45696e+07	2.35782e+07	2.05618e+07	2.20427e+07	2.24712e+07	2.39125e+07	1.8702e+07
13(S)-HODE	3.86	level1			295.226	275.8	NEG	5.69369e+08	6.00177e+08	5.44873e+08	6.30528e+08	5.81756e+08	5.93429e+08	4.45231e+08	4.61319e+08	4.8753e+08	4.23829e+08	3.99489e+08	3.71403e+08	3.52182e+08	4.3512e+08	3.73047e+08	4.06163e+08	3.98782e+08	3.47458e+08	3.3553e+08	3.11647e+08	4.15998e+08	3.78174e+08	3.62748e+08	3.30931e+08	4.20947e+08	4.62212e+08	4.0728e+08	4.17662e+08
Indoleacetic acid	3.86	level1			176.07	178.1	POS	1.38962e+07	1.39167e+07	1.39981e+07	1.29723e+07	1.7256e+07	1.58915e+07	1.14138e+07	1.42241e+07	1.15687e+07	1.19821e+07	1.17226e+07	9.8354e+06	5.77198e+06	5.36125e+06	4.53429e+06	7.41205e+06	6.54984e+06	6.79662e+06	7.63842e+06	6.87805e+06	5.71323e+06	1.25121e+07	9.6003e+06	8.81021e+06	9.57537e+06	9.71428e+06	1.01643e+07	1.07794e+07
Dropropizine	3.86	level1			237.159	47.2	POS	3.2033e+06	623247	512023	0	9.91722e+06	636663	605627	1.52297e+06	0	0	564515	0	737089	4.51195e+06	0	6.08491e+06	1.71602e+06	8.4725e+06	4.948e+06	4.28244e+06	9.39617e+06	4.53696e+06	4.33292e+06	0	963265	922810	1.85659e+06	2.63749e+06
Guanosine	3.86	level1			284.097	35.1	POS	7.15184e+06	7.81675e+06	4.26037e+06	4.59011e+06	2.9284e+06	6.23738e+06	4.32872e+06	4.52153e+06	1.87789e+06	3.76248e+06	1.99936e+06	1.90836e+06	2.62237e+06	2.57348e+06	5.92063e+06	2.33615e+06	3.46349e+06	3.30542e+06	3.76503e+06	2.56526e+06	7.08265e+06	6.8428e+06	5.97544e+06	1.65268e+06	5.58818e+06	4.77926e+06	5.33109e+06	5.62699e+06
Nicotinate	3.86	level1			122.024	28	NEG	4.13497e+07	4.01618e+07	4.35041e+07	3.61004e+07	4.53785e+07	4.40123e+07	4.25638e+07	4.60548e+07	5.19936e+07	5.01165e+07	4.4373e+07	4.56562e+07	5.35822e+07	6.28143e+07	5.88358e+07	6.24885e+07	5.58737e+07	6.02538e+07	6.50836e+07	8.10304e+07	8.64459e+07	5.54174e+07	5.5509e+07	4.60761e+07	5.16812e+07	5.26581e+07	5.04441e+07	5.19152e+07
Propionic acid	3.86	level1			73.0292	28	NEG	2.71794e+07	3.01711e+07	3.02223e+07	2.71035e+07	3.41399e+07	3.6093e+07	3.92776e+07	3.88028e+07	4.26596e+07	5.87859e+07	3.54305e+07	6.11708e+07	4.22637e+07	4.76875e+07	4.13409e+07	4.34089e+07	4.45147e+07	4.12363e+07	4.43935e+07	4.15465e+07	4.37338e+07	4.71693e+07	4.23678e+07	3.76998e+07	3.77282e+07	3.92095e+07	3.72719e+07	4.13025e+07
NAE(18:3(9Z,12Z,15Z))	3.85	level1			322.273	285.7	POS	1.08653e+07	1.33904e+07	1.25237e+07	1.26812e+07	1.48449e+07	1.24098e+07	1.63156e+07	1.8569e+07	1.69657e+07	1.68921e+07	2.12448e+07	1.27125e+07	1.19458e+07	1.15774e+07	9.86207e+06	1.01426e+07	1.17342e+07	1.09921e+07	1.15606e+07	1.021e+07	9.8336e+06	1.74669e+07	1.41907e+07	1.65363e+07	1.22938e+07	1.44925e+07	1.32547e+07	1.47913e+07
Lonicerin	3.85	level1			595.162	187.3	POS	1.70554e+07	2.48724e+07	1.18066e+07	1.61573e+07	3.36917e+07	2.46049e+07	2.18724e+07	1.7959e+07	8.65018e+06	1.68616e+07	1.95325e+07	1.39431e+07	1.87949e+07	2.38463e+07	3.85e+07	6.03121e+07	5.98847e+07	2.14277e+07	3.46437e+07	3.95405e+07	6.75413e+07	2.93759e+07	2.95175e+07	2.58303e+07	2.77877e+07	2.88253e+07	2.8148e+07	2.96998e+07
Benzoic acid	3.85	level1			121.029	192.2	NEG	1.62918e+08	1.45725e+08	1.41767e+08	1.39128e+08	1.15274e+08	1.75344e+08	1.15541e+08	1.56085e+08	1.73443e+08	1.4579e+08	1.16096e+08	1.00328e+08	9.00817e+07	9.35673e+07	1.04615e+08	8.62637e+07	1.09065e+08	1.71565e+08	1.77653e+08	2.04041e+08	2.41695e+08	1.208e+08	1.29539e+08	1.01962e+08	1.40391e+08	1.33074e+08	1.35427e+08	1.33239e+08
4beta-Hydroxycholesterol	3.85	level1			385.344	320	POS	493241	800622	679879	1.14411e+06	731929	4.50511e+06	973974	545343	303850	1.12228e+06	1.6183e+06	431641	1.39984e+06	51266.3	399502	611316	796174	1.51355e+06	426525	664504	1.06686e+06	1.79484e+06	1.81509e+06	3.10899e+06	995151	1.54812e+06	505502	1.24327e+06
Isosteviol	3.85	level1			317.211	289	NEG	3.38363e+06	6.47162e+06	3.49024e+06	3.64447e+06	3.63965e+06	3.40794e+06	3.42796e+06	3.92452e+06	3.54213e+06	4.94934e+06	2.75015e+06	3.71758e+06	5.78691e+06	3.89789e+06	4.56426e+06	3.74178e+06	2.94478e+06	4.33782e+06	2.98123e+06	5.06661e+06	2.57336e+06	3.05384e+06	3.02258e+06	4.55476e+06	3.65378e+06	3.65766e+06	5.12965e+06	3.13418e+06
9-Oxo-10(E),12(E)-octadecadienoic acid	3.85	level1			293.21	287.6	NEG	1.03893e+09	9.89964e+08	1.11345e+09	6.90608e+08	9.70575e+08	1.29535e+09	8.89565e+08	8.36072e+08	7.93536e+08	1.48153e+09	1.13707e+09	1.55507e+09	1.07648e+09	8.949e+08	1.7199e+09	1.24215e+09	1.09502e+09	1.32914e+09	2.80184e+09	2.58576e+09	3.50187e+09	2.69604e+09	3.26078e+09	1.55992e+09	1.50287e+09	1.48972e+09	1.4032e+09	2.4254e+09
8-Gingerol;8-GINGEROL	3.85	level1			303.195	263.9	NEG	6.48557e+06	6.69418e+06	6.4222e+06	7.491e+06	6.47879e+06	7.04417e+06	4.89569e+06	5.29059e+06	4.51114e+06	4.36733e+06	4.85528e+06	5.80539e+06	5.81689e+06	6.01413e+06	8.80715e+06	6.66151e+06	4.941e+06	6.33057e+06	5.30885e+06	6.16061e+06	3.72453e+06	4.22373e+06	4.71005e+06	6.86389e+06	5.94201e+06	5.91187e+06	5.47976e+06	5.41394e+06
Prostaglandin I2 (PGI2)	3.85	level1			351.216	240.9	NEG	6.43073e+07	7.04439e+07	7.22126e+07	7.22398e+07	8.26528e+07	6.83429e+07	9.30491e+07	9.5477e+07	7.97908e+07	9.37099e+07	8.37781e+07	9.43898e+07	9.08067e+07	9.98843e+07	1.15321e+08	9.8919e+07	7.73014e+07	1.01166e+08	6.8856e+07	8.17277e+07	7.84905e+07	7.32136e+07	7.75885e+07	9.97849e+07	7.55028e+07	8.85868e+07	8.93377e+07	9.07837e+07
Tridecanedioic acid	3.85	level1			225.149	235.6	NEG	1.64262e+07	1.76879e+07	2.07477e+07	1.8609e+07	2.03246e+07	1.81799e+07	3.12846e+07	3.25388e+07	3.24747e+07	3.20054e+07	3.12176e+07	3.60634e+07	3.34272e+07	2.89427e+07	3.39784e+07	2.10604e+07	2.55466e+07	2.57687e+07	1.80269e+07	2.48098e+07	2.1576e+07	2.45535e+07	2.50245e+07	2.89123e+07	2.64172e+07	2.7157e+07	2.77445e+07	2.70993e+07
(±)-Dihydroactinidiolide	3.85	level1			181.121	220.3	POS	3.71851e+08	4.10052e+08	3.85515e+08	3.67629e+08	3.66991e+08	4.01657e+08	4.1146e+08	4.24228e+08	4.77214e+08	4.53878e+08	3.90847e+08	4.08468e+08	3.95373e+08	3.96212e+08	4.22162e+08	3.47554e+08	3.74501e+08	4.1205e+08	3.66159e+08	3.34445e+08	3.33799e+08	3.75961e+08	3.54333e+08	3.60642e+08	3.66406e+08	3.88366e+08	3.87165e+08	3.74145e+08
Abscisic acid	3.85	level1			263.128	201.2	NEG	2.59908e+07	2.94048e+07	3.67938e+07	2.88318e+07	3.83721e+07	3.16366e+07	3.87036e+07	2.94839e+07	3.77606e+07	4.10918e+07	3.49109e+07	4.3503e+07	3.13477e+07	3.07661e+07	3.84516e+07	3.13767e+07	3.14501e+07	2.96314e+07	7.51206e+07	6.69193e+07	5.28986e+07	3.65069e+07	3.0644e+07	3.8915e+07	3.25911e+07	3.29367e+07	3.36783e+07	3.19592e+07
3,3-Dimethylcyclohexanone	3.85	level1			109.1	189.4	POS	1.73415e+07	1.87832e+07	1.90711e+07	1.64486e+07	2.07611e+07	1.87577e+07	1.7695e+07	1.54144e+07	1.83982e+07	1.90508e+07	1.94247e+07	1.84591e+07	1.84768e+07	1.9495e+07	1.93898e+07	1.46646e+07	1.81903e+07	1.64594e+07	2.07055e+07	2.11262e+07	1.99935e+07	1.56932e+07	1.49137e+07	1.7317e+07	1.79744e+07	1.83595e+07	1.86149e+07	1.79567e+07
5-Hydroxyvalproic acid	3.85	level1			159.102	183.4	NEG	1.12278e+07	8.51298e+06	9.03886e+06	8.82869e+06	8.21359e+06	9.75332e+06	1.02982e+07	1.04485e+07	9.67176e+06	9.40734e+06	8.88462e+06	9.00942e+06	7.88064e+06	7.02735e+06	4.55544e+06	1.12629e+07	6.21307e+06	6.14718e+06	1.03611e+07	1.14819e+07	1.14696e+07	6.41194e+06	5.39735e+06	4.34844e+06	7.88363e+06	7.80322e+06	7.67463e+06	6.9164e+06
4-Feruloylquinic acid	3.85	level1			367.102	160.9	NEG	2.17556e+07	2.17011e+07	1.27761e+07	2.01651e+07	2.12961e+07	2.28192e+07	2.021e+07	2.63121e+07	1.00191e+07	2.89851e+07	1.64297e+07	1.37932e+07	1.14507e+07	9.85077e+06	1.09633e+07	9.66103e+06	1.37976e+07	9.3307e+06	1.37922e+07	1.03862e+07	1.20678e+07	1.43861e+07	1.06283e+07	1.17259e+07	1.45716e+07	1.4687e+07	1.4231e+07	1.40821e+07
N-Acetylphenylalanine	3.85	level1			206.081	149.8	NEG	1.06197e+09	1.13921e+09	8.70154e+08	1.01711e+09	8.08068e+08	8.47185e+08	1.63467e+09	1.47466e+09	1.04927e+09	1.02596e+09	1.28387e+09	1.21257e+09	2.76228e+09	1.95227e+09	1.56288e+09	1.36304e+09	2.94076e+09	2.00139e+09	1.88293e+09	1.44046e+09	2.22802e+09	2.64343e+09	2.98904e+09	2.81091e+09	1.46601e+09	1.56015e+09	1.60782e+09	1.52945e+09
2-Phenylacetamide	3.85	level1			136.075	146.1	POS	3.61568e+07	3.47003e+07	2.99803e+07	3.1491e+07	2.42132e+07	3.63439e+07	3.03031e+07	4.1528e+07	3.35366e+07	3.24463e+07	2.76841e+07	1.8471e+07	2.15282e+07	2.093e+07	2.36629e+07	1.59634e+07	2.21464e+07	3.72191e+07	3.73934e+07	3.53271e+07	4.24813e+07	4.1661e+07	3.92716e+07	2.88016e+07	2.9733e+07	3.02035e+07	3.01227e+07	3.04551e+07
6-Hydroxynicotinic acid	3.85	level1			138.019	35.3	NEG	2.21159e+07	1.48498e+07	1.75436e+07	1.32195e+07	1.60446e+07	1.52248e+07	2.15498e+07	1.87635e+07	3.03216e+07	2.39445e+07	2.28987e+07	2.53e+07	5.82288e+07	6.345e+07	2.10578e+07	6.27414e+07	6.42602e+07	5.9346e+07	6.47665e+07	7.40266e+07	6.29258e+07	5.65821e+07	5.75058e+07	2.05121e+07	5.6805e+07	2.10826e+07	5.96874e+07	2.01567e+07
Norleucine	3.85	level1			130.087	28.6	NEG	3.8649e+07	3.70208e+07	3.21931e+07	2.85201e+07	2.78645e+07	4.0329e+07	2.41076e+07	2.75279e+07	2.92246e+07	2.84631e+07	2.50445e+07	1.97945e+07	1.70148e+07	1.61605e+07	2.77084e+07	1.91044e+07	2.36723e+07	3.16875e+07	2.24896e+07	1.97063e+07	2.23752e+07	2.71681e+07	2.6851e+07	1.80063e+07	2.6707e+07	2.77096e+07	2.6634e+07	2.57837e+07
Malic acid	3.85	level1			133.013	25.4	NEG	5.28136e+09	4.92757e+09	5.95099e+09	5.01282e+09	5.5481e+09	6.51013e+09	4.13918e+09	3.71553e+09	5.18269e+09	4.26203e+09	4.79151e+09	4.05557e+09	4.21828e+09	3.93706e+09	5.58811e+09	5.79071e+09	5.2256e+09	4.4618e+09	5.81995e+09	6.92209e+09	6.90376e+09	4.21559e+09	4.90162e+09	3.8389e+09	4.8346e+09	5.41092e+09	4.86431e+09	4.94888e+09
Quinic acid	3.85	level1			191.055	22.7	NEG	2.85018e+08	3.11446e+08	2.69063e+08	2.76768e+08	3.61231e+08	3.6615e+08	3.03824e+08	2.88904e+08	4.16138e+08	3.51188e+08	3.12056e+08	2.68893e+08	2.28902e+08	1.9992e+08	3.32558e+08	3.01455e+08	3.01359e+08	2.55785e+08	3.04219e+08	4.27156e+08	4.22526e+08	2.27295e+08	2.37563e+08	1.92594e+08	2.905e+08	2.92752e+08	2.81404e+08	2.85661e+08
Nicotiflorin	3.84	level1			595.162	187.3	POS	1.70554e+07	2.48724e+07	1.18066e+07	1.61573e+07	3.36917e+07	2.46049e+07	2.18724e+07	1.7959e+07	8.65018e+06	1.68616e+07	1.95325e+07	1.39431e+07	1.87949e+07	2.38463e+07	3.85e+07	6.03121e+07	5.98847e+07	2.14277e+07	3.46437e+07	3.95405e+07	6.75413e+07	2.93759e+07	2.95175e+07	2.58303e+07	2.77877e+07	2.88253e+07	2.8148e+07	2.96998e+07
Prostaglandin A2	3.84	level1			333.206	244.2	NEG	1.06313e+07	1.26597e+07	1.13803e+07	1.68747e+07	8.18055e+06	1.08617e+07	1.09146e+07	4.95831e+07	1.43349e+07	1.01721e+07	9.20008e+06	1.16305e+07	1.09894e+07	1.26947e+07	1.72413e+07	1.45908e+07	2.81435e+07	1.48163e+07	9.23768e+06	4.58728e+07	1.10344e+07	3.71085e+07	9.41671e+06	1.28168e+07	1.1684e+07	1.13703e+07	1.21012e+07	1.14033e+07
Hydroxyacetone	3.84	level1			73.0292	28	NEG	2.71794e+07	3.01711e+07	3.02223e+07	2.71035e+07	3.41399e+07	3.6093e+07	3.92776e+07	3.88028e+07	4.26596e+07	5.87859e+07	3.54305e+07	6.11708e+07	4.22637e+07	4.76875e+07	4.13409e+07	4.34089e+07	4.45147e+07	4.12363e+07	4.43935e+07	4.15465e+07	4.37338e+07	4.71693e+07	4.23678e+07	3.76998e+07	3.77282e+07	3.92095e+07	3.72719e+07	4.13025e+07
Leucine	3.84	level1			130.087	28.6	NEG	3.8649e+07	3.70208e+07	3.21931e+07	2.85201e+07	2.78645e+07	4.0329e+07	2.41076e+07	2.75279e+07	2.92246e+07	2.84631e+07	2.50445e+07	1.97945e+07	1.70148e+07	1.61605e+07	2.77084e+07	1.91044e+07	2.36723e+07	3.16875e+07	2.24896e+07	1.97063e+07	2.23752e+07	2.71681e+07	2.6851e+07	1.80063e+07	2.6707e+07	2.77096e+07	2.6634e+07	2.57837e+07
Palmitic acid	3.84	level1			255.232	321.3	NEG	1.189e+09	9.1916e+08	1.11349e+09	1.06644e+09	1.1226e+09	8.26254e+08	9.26344e+08	1.32074e+09	1.45044e+09	1.26963e+09	1.41109e+09	1.07818e+09	1.12457e+09	8.61034e+08	8.49069e+08	7.92735e+08	1.0163e+09	1.12217e+09	8.44316e+08	7.35586e+08	9.8692e+08	9.95665e+08	1.11243e+09	1.02072e+09	8.515e+08	8.46748e+08	1.29415e+09	1.27776e+09
Lufenuron	3.84	level1			508.967	275.8	NEG	1.22838e+08	9.14565e+07	1.6422e+08	9.97453e+07	1.0196e+08	1.28071e+08	6.90567e+08	5.32727e+08	7.0726e+08	5.04775e+08	7.4525e+08	6.43152e+08	1.13452e+08	9.23147e+07	3.48597e+08	7.6135e+07	4.76557e+07	2.70233e+07	5.94389e+07	9.7468e+07	1.43141e+08	2.12449e+08	1.84394e+08	6.2743e+06	2.41295e+08	2.49496e+08	2.39513e+08	2.43436e+08
Hexadecanedioic acid	3.84	level1			285.205	269.8	NEG	1.06034e+07	1.85301e+07	1.1137e+07	9.9625e+06	1.14682e+07	1.32829e+07	9.87555e+06	9.0236e+06	1.35536e+07	1.26124e+07	9.31606e+06	1.0015e+07	9.04829e+06	9.91102e+06	1.11182e+07	1.11157e+07	1.06693e+07	1.14596e+07	1.37837e+07	1.55659e+07	1.77407e+07	1.13696e+07	1.25155e+07	1.08444e+07	1.04133e+07	1.16872e+07	1.09267e+07	1.22222e+07
Prostaglandin F2alpha (PGF2a)	3.84	level1			353.232	241.5	NEG	1.02874e+08	1.0715e+08	1.02596e+08	1.06659e+08	1.20043e+08	1.05233e+08	1.28516e+08	1.47245e+08	1.26531e+08	1.08269e+08	9.70088e+07	1.18995e+08	1.02319e+08	1.03242e+08	1.22644e+08	9.78134e+07	7.78278e+07	9.47542e+07	7.49916e+07	8.60119e+07	6.46181e+07	7.67054e+07	8.41961e+07	1.07569e+08	1.04278e+08	9.96202e+07	1.03381e+08	1.06261e+08
Isoferulic acid	3.84	level1			193.049	179.5	NEG	1.91941e+07	2.12985e+07	2.21017e+07	1.99455e+07	2.4798e+07	2.20404e+07	2.70104e+07	2.7087e+07	2.29453e+07	3.32164e+07	4.21888e+07	2.40596e+07	2.03114e+07	2.42882e+07	2.31519e+07	2.74643e+07	2.67581e+07	1.79881e+07	1.73911e+07	1.57118e+07	1.52752e+07	1.89237e+07	1.7583e+07	1.95551e+07	2.32998e+07	2.22249e+07	2.2689e+07	2.25583e+07
Phloroglucinaldehyde	3.84	level1			153.019	166.7	NEG	1.05179e+07	9.88803e+06	9.66211e+06	8.44395e+06	1.21625e+07	1.12383e+07	7.25843e+06	5.85541e+06	7.89376e+06	9.01552e+06	1.06515e+07	6.9464e+06	7.95917e+06	7.33044e+06	9.33173e+06	1.12985e+07	9.93722e+06	9.31856e+06	1.00427e+07	9.21851e+06	1.15725e+07	9.00053e+06	8.03733e+06	7.88744e+06	9.16991e+06	9.26733e+06	8.98771e+06	9.49357e+06
Phenylacetylglutamine	3.84	level1			263.102	121.4	NEG	1.3022e+07	1.81131e+07	1.33394e+07	8.28097e+06	1.29951e+07	1.77771e+07	5.43183e+06	1.88879e+07	1.27618e+07	1.50396e+07	7.77851e+06	1.41229e+07	5.17004e+06	7.20605e+06	1.08793e+07	1.04877e+07	1.45249e+07	1.41016e+07	1.38763e+07	1.49902e+07	1.48845e+07	1.43382e+07	8.81324e+06	1.66484e+07	6.61616e+06	1.37489e+07	1.36837e+07	1.40867e+07
3-Hydroxymandelic acid	3.84	level1			167.034	44.8	NEG	5.27137e+06	5.07879e+06	4.92132e+06	5.03526e+06	5.62064e+06	5.62256e+06	7.79623e+06	5.91562e+06	5.45866e+06	6.58252e+06	6.94497e+06	5.72455e+06	6.28961e+06	6.24986e+06	6.16908e+06	6.76082e+06	7.734e+06	5.90494e+06	5.61698e+06	5.50672e+06	5.473e+06	7.05525e+06	5.80537e+06	8.06322e+06	5.89659e+06	1.82039e+07	6.01389e+06	5.81074e+06
4-Hydroxyglutamic acid	3.84	level1			144.03	24	NEG	1.0063e+07	8.91848e+06	9.88861e+06	1.01523e+07	8.86933e+06	1.02649e+07	4.66984e+06	5.49621e+06	7.17641e+06	5.63196e+06	4.79472e+06	4.49599e+06	3.91498e+06	4.22293e+06	2.7164e+06	4.76816e+06	3.45576e+06	3.74029e+06	4.85473e+06	6.76631e+06	5.98402e+06	4.76533e+06	4.37295e+06	3.17492e+06	8.51789e+06	8.01494e+06	5.94558e+06	6.29957e+06
Allose	3.84	level1			161.045	3.3	NEG	2.4541e+07	2.27091e+07	1.29147e+07	1.19628e+07	1.4759e+07	1.14817e+07	1.37161e+07	2.5092e+07	2.18379e+07	2.15983e+07	1.94903e+07	2.04827e+07	1.02223e+07	2.16325e+07	1.21061e+07	9.46193e+06	1.10693e+07	1.04412e+07	1.0175e+07	2.30592e+07	1.30416e+07	1.10622e+07	2.32412e+07	1.36861e+07	1.93986e+07	1.21399e+07	2.29516e+07	1.08777e+07
Hydroxytyrosol acetate	3.83	level1			195.065	174	NEG	1.31355e+07	7.91264e+06	7.28755e+06	8.18724e+06	8.65786e+06	6.90731e+06	9.22472e+06	9.48393e+06	8.32656e+06	8.83912e+06	7.17257e+06	1.70145e+07	5.69219e+06	6.49475e+06	5.83062e+06	6.45602e+06	1.1322e+07	6.00512e+06	4.57705e+06	6.76353e+06	5.07516e+06	5.69829e+06	1.20237e+07	1.03588e+07	1.10904e+07	7.14078e+06	7.98769e+06	6.79601e+06
Isoleucine	3.83	level1			130.087	28.6	NEG	3.8649e+07	3.70208e+07	3.21931e+07	2.85201e+07	2.78645e+07	4.0329e+07	2.41076e+07	2.75279e+07	2.92246e+07	2.84631e+07	2.50445e+07	1.97945e+07	1.70148e+07	1.61605e+07	2.77084e+07	1.91044e+07	2.36723e+07	3.16875e+07	2.24896e+07	1.97063e+07	2.23752e+07	2.71681e+07	2.6851e+07	1.80063e+07	2.6707e+07	2.77096e+07	2.6634e+07	2.57837e+07
2,6-Dihydroxybenzoic acid	3.83	level1			153.019	166.7	NEG	1.05179e+07	9.88803e+06	9.66211e+06	8.44395e+06	1.21625e+07	1.12383e+07	7.25843e+06	5.85541e+06	7.89376e+06	9.01552e+06	1.06515e+07	6.9464e+06	7.95917e+06	7.33044e+06	9.33173e+06	1.12985e+07	9.93722e+06	9.31856e+06	1.00427e+07	9.21851e+06	1.15725e+07	9.00053e+06	8.03733e+06	7.88744e+06	9.16991e+06	9.26733e+06	8.98771e+06	9.49357e+06
trans-11-Eicosenoic acid	3.83	level1			309.279	336.6	NEG	2.36832e+07	1.30802e+07	2.29459e+07	1.90573e+07	2.17032e+07	1.29341e+07	1.58712e+07	2.5999e+07	2.72325e+07	2.39966e+07	3.21987e+07	1.69808e+07	2.21151e+07	1.39756e+07	1.23984e+07	1.6637e+07	1.70907e+07	1.93318e+07	1.2966e+07	9.58566e+06	1.72182e+07	1.67242e+07	2.22087e+07	1.88561e+07	1.18159e+07	1.52784e+07	2.1996e+07	2.3322e+07
Pyropheophorbide-a	3.83	level1			535.268	312.1	POS	1.91697e+07	1.75232e+07	2.21916e+07	1.5479e+07	2.43741e+07	1.89658e+07	3.03447e+07	3.82386e+07	2.77888e+07	3.64661e+07	4.00013e+07	2.87502e+07	2.16923e+07	1.70506e+07	3.49997e+07	1.4126e+07	1.78996e+07	2.24526e+07	1.54773e+07	1.23376e+07	9.78773e+06	3.2169e+07	2.3505e+07	3.37327e+07	2.42302e+07	2.50972e+07	2.38419e+07	2.4102e+07
Azelaic acid	3.83	level1			169.086	199.7	NEG	9.3983e+06	8.33911e+06	8.72537e+06	8.0895e+06	7.69661e+06	6.47251e+06	8.19007e+06	6.70919e+06	9.60442e+06	8.62735e+06	6.39128e+06	7.13551e+06	6.88254e+06	8.51862e+06	9.62744e+06	8.68258e+06	8.57837e+06	7.99965e+06	9.0922e+06	9.34546e+06	9.92081e+06	6.80401e+06	7.18934e+06	5.38463e+06	7.29114e+06	8.92222e+06	6.92128e+06	9.24096e+06
4-Methylquinolin-2-ol	3.83	level1			158.06	194	NEG	4.88903e+06	4.43638e+06	6.15919e+06	3.98548e+06	4.8225e+06	4.81641e+06	6.67329e+06	7.38931e+06	8.2982e+06	8.18544e+06	6.76679e+06	6.45962e+06	5.24537e+06	3.83975e+06	3.99814e+06	3.13531e+06	3.56318e+06	4.74027e+06	5.28983e+06	3.57773e+06	4.27264e+06	5.16463e+06	4.42897e+06	5.09068e+06	5.02409e+06	5.24974e+06	4.85818e+06	5.67703e+06
N-Lactoylphenylalanine	3.83	level1			238.106	154.1	POS	1.59022e+07	2.13608e+07	1.55894e+07	1.67134e+07	1.38035e+07	1.87281e+07	2.00779e+07	2.32821e+07	1.68212e+07	2.26369e+07	2.27452e+07	2.06757e+07	7.34786e+06	5.00503e+06	1.00544e+07	5.38479e+06	7.93729e+06	1.03166e+07	1.36237e+07	9.52091e+06	1.05128e+07	1.92313e+07	1.46496e+07	1.87761e+07	1.55737e+07	1.40171e+07	1.43459e+07	1.4806e+07
Scopolin	3.83	level1			353.086	145.8	NEG	2.32389e+07	5.89433e+07	4.66574e+07	2.5617e+07	4.29651e+07	2.72434e+07	7.12943e+07	1.18853e+08	5.89028e+07	7.71169e+07	8.599e+07	5.68377e+07	6.67187e+07	7.65864e+07	9.57466e+07	7.84506e+07	1.64297e+08	6.12242e+07	6.82518e+07	1.14307e+08	5.99934e+07	7.08349e+07	7.05627e+07	1.22007e+08	6.14583e+07	6.23961e+07	5.72328e+07	5.868e+07
Magnolioside	3.83	level1			353.086	145.8	NEG	2.32389e+07	5.89433e+07	4.66574e+07	2.5617e+07	4.29651e+07	2.72434e+07	7.12943e+07	1.18853e+08	5.89028e+07	7.71169e+07	8.599e+07	5.68377e+07	6.67187e+07	7.65864e+07	9.57466e+07	7.84506e+07	1.64297e+08	6.12242e+07	6.82518e+07	1.14307e+08	5.99934e+07	7.08349e+07	7.05627e+07	1.22007e+08	6.14583e+07	6.23961e+07	5.72328e+07	5.868e+07
Hydroxyisocaproic acid	3.83	level1			131.071	143.9	NEG	2.17786e+08	1.4229e+08	1.98374e+08	1.9859e+08	2.07251e+08	2.14039e+08	1.6468e+08	1.75916e+08	1.82882e+08	1.76767e+08	1.81656e+08	1.66272e+08	1.83223e+08	1.98058e+08	1.76068e+08	1.89034e+08	1.97481e+08	2.0245e+08	2.45197e+08	2.40511e+08	2.71459e+08	1.90549e+08	1.99562e+08	1.57599e+08	1.85709e+08	1.40098e+08	1.92988e+08	1.91633e+08
Leu-Ile	3.83	level1			245.184	88.2	POS	2.67272e+07	1.28177e+07	1.62813e+07	1.75233e+07	1.42455e+07	2.64242e+07	9.12643e+06	1.34599e+07	6.86911e+06	9.45258e+06	1.01491e+07	4.94507e+06	6.00361e+06	4.04436e+06	7.22114e+06	4.31095e+06	7.54237e+06	1.01837e+07	2.06206e+06	923359	1.02822e+06	1.12666e+07	7.62006e+06	8.22296e+06	1.02263e+07	8.99176e+06	9.60973e+06	1.05554e+07
3,5-Dihydroxybenzoic acid	3.83	level1			153.018	59.7	NEG	1.56501e+07	3.67508e+07	4.9755e+07	3.2044e+07	4.32489e+07	5.11698e+07	5.3618e+07	5.43816e+07	5.21335e+07	8.77176e+07	1.36041e+08	5.34254e+07	5.83027e+07	4.87846e+07	9.31241e+07	1.56263e+08	6.08822e+07	6.69664e+07	3.29295e+07	4.98346e+07	5.02092e+07	5.01105e+07	5.19175e+07	7.96169e+07	6.46761e+07	6.26017e+07	6.46553e+07	5.21449e+07
3-Pyridylacetic acid	3.83	level1			138.054	24.7	POS	5.37436e+07	6.57183e+07	5.23017e+07	5.57132e+07	5.49188e+07	6.39216e+07	5.34597e+07	4.41259e+07	6.1969e+07	6.05173e+07	5.92863e+07	5.12787e+07	5.68152e+07	6.14521e+07	6.59667e+07	7.47657e+07	7.34032e+07	8.5414e+07	8.24584e+07	9.30805e+07	9.74573e+07	7.00261e+07	6.60411e+07	6.11461e+07	6.91916e+07	7.22294e+07	6.49395e+07	7.16732e+07
Glutamate	3.83	level1			146.045	22.8	NEG	5.27387e+07	4.58041e+07	5.20718e+07	3.68378e+07	4.06062e+07	5.18797e+07	3.44148e+07	3.4625e+07	3.83976e+07	4.13193e+07	3.76435e+07	3.63455e+07	2.79229e+07	2.65828e+07	3.18486e+07	3.70612e+07	3.40314e+07	3.46908e+07	3.57839e+07	3.5739e+07	3.85277e+07	3.88694e+07	4.40011e+07	3.05585e+07	3.68538e+07	3.68416e+07	3.66809e+07	3.70456e+07
Gluconic acid	3.83	level1			195.05	22.1	NEG	1.54719e+08	1.47339e+08	1.60538e+08	1.20195e+08	1.61496e+08	1.83832e+08	1.37901e+08	1.16795e+08	1.52193e+08	1.51628e+08	1.37736e+08	1.34667e+08	1.46203e+08	1.33611e+08	1.81163e+08	1.7498e+08	1.47314e+08	1.44858e+08	1.84689e+08	2.16528e+08	2.21605e+08	1.29532e+08	1.35773e+08	1.26837e+08	1.49869e+08	1.50022e+08	1.46356e+08	1.44173e+08
Crotonoside	3.82	level1			284.097	35.1	POS	7.15184e+06	7.81675e+06	4.26037e+06	4.59011e+06	2.9284e+06	6.23738e+06	4.32872e+06	4.52153e+06	1.87789e+06	3.76248e+06	1.99936e+06	1.90836e+06	2.62237e+06	2.57348e+06	5.92063e+06	2.33615e+06	3.46349e+06	3.30542e+06	3.76503e+06	2.56526e+06	7.08265e+06	6.8428e+06	5.97544e+06	1.65268e+06	5.58818e+06	4.77926e+06	5.33109e+06	5.62699e+06
N-Phenylacetamide	3.82	level1			136.075	146.1	POS	3.61568e+07	3.47003e+07	2.99803e+07	3.1491e+07	2.42132e+07	3.63439e+07	3.03031e+07	4.1528e+07	3.35366e+07	3.24463e+07	2.76841e+07	1.8471e+07	2.15282e+07	2.093e+07	2.36629e+07	1.59634e+07	2.21464e+07	3.72191e+07	3.73934e+07	3.53271e+07	4.24813e+07	4.1661e+07	3.92716e+07	2.88016e+07	2.9733e+07	3.02035e+07	3.01227e+07	3.04551e+07
3-Amino-4-methylpentanoic acid	3.82	level1			130.087	28.6	NEG	3.8649e+07	3.70208e+07	3.21931e+07	2.85201e+07	2.78645e+07	4.0329e+07	2.41076e+07	2.75279e+07	2.92246e+07	2.84631e+07	2.50445e+07	1.97945e+07	1.70148e+07	1.61605e+07	2.77084e+07	1.91044e+07	2.36723e+07	3.16875e+07	2.24896e+07	1.97063e+07	2.23752e+07	2.71681e+07	2.6851e+07	1.80063e+07	2.6707e+07	2.77096e+07	2.6634e+07	2.57837e+07
cis-11-Eicosenoic acid	3.82	level1			309.279	336.6	NEG	2.36832e+07	1.30802e+07	2.29459e+07	1.90573e+07	2.17032e+07	1.29341e+07	1.58712e+07	2.5999e+07	2.72325e+07	2.39966e+07	3.21987e+07	1.69808e+07	2.21151e+07	1.39756e+07	1.23984e+07	1.6637e+07	1.70907e+07	1.93318e+07	1.2966e+07	9.58566e+06	1.72182e+07	1.67242e+07	2.22087e+07	1.88561e+07	1.18159e+07	1.52784e+07	2.1996e+07	2.3322e+07
N-Lactoyl-Phenylalanine	3.82	level1			238.106	154.1	POS	1.59022e+07	2.13608e+07	1.55894e+07	1.67134e+07	1.38035e+07	1.87281e+07	2.00779e+07	2.32821e+07	1.68212e+07	2.26369e+07	2.27452e+07	2.06757e+07	7.34786e+06	5.00503e+06	1.00544e+07	5.38479e+06	7.93729e+06	1.03166e+07	1.36237e+07	9.52091e+06	1.05128e+07	1.92313e+07	1.46496e+07	1.87761e+07	1.55737e+07	1.40171e+07	1.43459e+07	1.4806e+07
Trigonelline	3.82	level1			138.054	24.7	POS	5.37436e+07	6.57183e+07	5.23017e+07	5.57132e+07	5.49188e+07	6.39216e+07	5.34597e+07	4.41259e+07	6.1969e+07	6.05173e+07	5.92863e+07	5.12787e+07	5.68152e+07	6.14521e+07	6.59667e+07	7.47657e+07	7.34032e+07	8.5414e+07	8.24584e+07	9.30805e+07	9.74573e+07	7.00261e+07	6.60411e+07	6.11461e+07	6.91916e+07	7.22294e+07	6.49395e+07	7.16732e+07
Phytanic acid	3.82	level1			311.295	341.4	NEG	5.03652e+07	2.90863e+07	5.22371e+07	3.90294e+07	3.81442e+07	3.03042e+07	4.63994e+07	8.00514e+07	6.67443e+07	6.65169e+07	8.21069e+07	4.35595e+07	5.1689e+07	4.05057e+07	2.71464e+07	2.02174e+07	3.19786e+07	3.79541e+07	2.60008e+07	1.64087e+07	1.8555e+07	2.85179e+07	3.65548e+07	3.03435e+07	3.37499e+07	3.75849e+07	4.06719e+07	4.69447e+07
Aurantiamide	3.82	level1			403.199	234.2	POS	2.12376e+06	4.33923e+06	2.8323e+06	9.15259e+06	2.93407e+06	3.33851e+06	8.58222e+06	7.98723e+06	1.78634e+06	3.51675e+06	2.22947e+06	2.72514e+06	1.91194e+07	1.61514e+07	1.14895e+07	1.48593e+07	1.14136e+07	2.18417e+07	2.92958e+06	2.49027e+06	1.85166e+06	1.82879e+07	6.36849e+06	9.73485e+06	7.41728e+06	7.39694e+06	7.4193e+06	7.04879e+06
Valpromide	3.82	level1			144.137	224.3	POS	3.1878e+06	3.19975e+06	2.9453e+06	3.57948e+06	3.6933e+06	3.18168e+06	3.83389e+06	2.31329e+06	3.3328e+06	3.57303e+06	2.25686e+06	2.98457e+06	3.50914e+06	4.12949e+06	2.90107e+06	3.22708e+06	3.70441e+06	3.14439e+06	3.61381e+06	4.25585e+06	3.3039e+06	3.2427e+06	1.54862e+06	3.1003e+06	3.65664e+06	3.78493e+06	3.86668e+06	3.75307e+06
Indole-3-carboxylic acid	3.82	level1			160.04	192	NEG	6.8214e+07	6.92179e+07	6.7072e+07	5.76907e+07	6.80497e+07	7.92778e+07	7.85939e+07	9.24335e+07	7.41542e+07	9.46614e+07	7.24619e+07	9.04563e+07	6.10939e+07	5.23779e+07	6.94629e+07	5.65906e+07	6.22112e+07	6.33734e+07	8.63117e+07	8.85279e+07	7.3288e+07	6.26152e+07	7.11e+07	5.79614e+07	7.07237e+07	6.78117e+07	6.92568e+07	6.87351e+07
Pantethine	3.82	level1			555.249	168.9	POS	2.82167e+06	1.94145e+06	2.37408e+06	2.10197e+06	1.88582e+06	2.62433e+06	1.47838e+06	1.24443e+06	1.80561e+06	1.22772e+06	1.29149e+06	1.06032e+06	938214	1.59205e+06	1.23588e+06	1.53265e+06	1.86301e+06	1.21382e+06	1.98049e+06	2.21133e+06	2.20439e+06	1.55656e+06	1.99879e+06	2.08226e+06	2.06659e+06	1.56031e+06	1.5754e+06	1.94622e+06
Thymine	3.82	level1			127.05	37.1	POS	1.57435e+07	1.15267e+07	1.36242e+07	1.20097e+07	9.47829e+06	6.89385e+06	2.84491e+07	2.5369e+07	2.71837e+07	2.39061e+07	2.22623e+07	2.65221e+07	3.37615e+07	2.69289e+07	2.08136e+07	2.02363e+07	2.12596e+07	2.03595e+07	1.25426e+07	1.3107e+07	1.34072e+07	1.81108e+07	1.87968e+07	1.70509e+07	1.66626e+07	2.29095e+07	1.8643e+07	1.99268e+07
2'-O-Methyluridine	3.82	level1			257.077	36.1	NEG	1.10944e+07	9.46357e+06	1.1645e+07	1.03287e+07	9.75412e+06	9.57318e+06	7.74842e+06	6.83821e+06	9.06165e+06	9.37351e+06	8.45476e+06	8.47819e+06	6.3948e+06	6.03362e+06	5.88913e+06	7.75785e+06	8.45381e+06	7.85673e+06	5.07681e+06	4.59372e+06	5.29968e+06	5.74056e+06	6.69778e+06	6.00125e+06	8.10568e+06	7.90007e+06	8.31521e+06	8.17426e+06
2-Aminopurine	3.82	level1			136.061	33.1	POS	3.59621e+07	4.01747e+07	2.9876e+07	4.02339e+07	3.50179e+07	2.67313e+07	4.98201e+07	5.6225e+07	4.21613e+07	4.67488e+07	4.33219e+07	4.08013e+07	4.42435e+07	4.10525e+07	4.54272e+07	3.77765e+07	4.03595e+07	4.97611e+07	2.59846e+07	2.87991e+07	2.90945e+07	4.47002e+07	3.93873e+07	3.6423e+07	3.94234e+07	4.07054e+07	4.53385e+07	3.89213e+07
5-Oxo-L-prolyl-L-proline	3.82	level1			225.087	28.9	NEG	8.80913e+06	9.28847e+06	1.02812e+07	1.06755e+07	1.04828e+07	9.66052e+06	8.42894e+06	7.5242e+06	9.30405e+06	7.96513e+06	9.21472e+06	9.70298e+06	9.66708e+06	9.58055e+06	7.8685e+06	1.02798e+07	1.00545e+07	7.90413e+06	7.2112e+06	8.48772e+06	9.06086e+06	7.09135e+06	7.31263e+06	7.90955e+06	7.45316e+06	8.18938e+06	6.95004e+06	9.58315e+06
Citric acid	3.82	level1			191.019	27.1	NEG	4.1257e+08	4.9317e+08	3.88807e+08	2.6178e+08	1.94732e+08	4.52168e+08	1.45914e+08	9.42454e+07	4.24646e+07	1.08215e+08	9.66967e+07	1.3957e+08	1.58361e+08	1.44049e+08	3.88202e+08	1.44137e+08	1.80709e+08	3.86649e+08	5.01284e+08	5.23426e+08	5.3556e+08	4.98931e+08	5.48311e+08	3.13038e+08	2.4442e+08	2.495e+08	2.71972e+08	3.02142e+08
Proline	3.82	level1			116.07	24.2	POS	2.53185e+07	4.56765e+07	1.78202e+07	4.51517e+07	1.7226e+07	3.04392e+07	8.39558e+06	9.70603e+06	8.10119e+06	9.00089e+06	7.63565e+06	4.75118e+06	1.17243e+07	3.87397e+06	1.14903e+07	1.13506e+07	1.02242e+07	2.32759e+07	7.23717e+06	5.73466e+06	1.39565e+07	8.73804e+06	7.63752e+06	4.70358e+06	1.42194e+07	1.46858e+07	1.32781e+07	1.43961e+07
N6,N6,N6-Trimethyllysine	3.82	level1			189.159	22.1	POS	2.96578e+07	3.25782e+07	2.66062e+07	3.3469e+07	2.60806e+07	2.68824e+07	2.72366e+07	2.98701e+07	2.61513e+07	2.90966e+07	2.50085e+07	2.68159e+07	2.22904e+07	2.87676e+07	1.75944e+07	1.57676e+07	2.00761e+07	3.32981e+07	1.77946e+07	1.48011e+07	1.29332e+07	2.96851e+07	2.48271e+07	3.23821e+07	2.33037e+07	2.38392e+07	2.32756e+07	2.64704e+07
Histidine	3.82	level1			156.076	21.5	POS	2.18164e+07	3.02803e+07	1.08356e+07	2.33936e+07	1.02205e+07	2.01738e+07	1.05196e+07	1.72091e+07	7.44477e+06	1.01017e+07	9.99419e+06	7.46448e+06	4.07215e+06	3.03716e+06	5.40004e+06	4.51763e+06	6.79466e+06	1.05263e+07	4.38069e+06	2.80581e+06	3.08565e+06	1.84562e+07	9.67848e+06	1.01132e+07	1.06572e+07	7.33555e+06	1.05138e+07	9.60685e+06
2-Methylhippuric acid	3.81	level1			192.066	153.1	NEG	2.83476e+08	2.39587e+08	2.12459e+08	2.08236e+08	1.86414e+08	2.23005e+08	2.27857e+08	2.96187e+08	2.12306e+08	2.66423e+08	2.14291e+08	1.9918e+08	1.44209e+08	9.36071e+07	1.5049e+08	7.87823e+07	1.17465e+08	1.51916e+08	1.68507e+08	1.32859e+08	1.31395e+08	2.8089e+08	2.53963e+08	2.78756e+08	1.9425e+08	1.89167e+08	1.91033e+08	1.95508e+08
Alfacalcidol	3.81	level1			383.329	307.5	POS	1.05008e+07	1.09368e+07	9.06103e+06	1.14354e+07	1.27675e+07	1.49401e+07	1.18857e+07	5.35092e+06	6.84675e+06	1.07737e+07	8.38254e+06	1.00367e+07	8.19196e+06	3.1836e+06	5.06293e+06	1.128e+07	7.39135e+06	8.25844e+06	1.32944e+07	1.25627e+07	8.4476e+06	1.85494e+07	1.33467e+07	1.00017e+07	1.143e+07	1.83172e+07	7.6463e+06	1.54776e+07
Cryptochlorogenic acid	3.81	level1			353.086	145.8	NEG	2.32389e+07	5.89433e+07	4.66574e+07	2.5617e+07	4.29651e+07	2.72434e+07	7.12943e+07	1.18853e+08	5.89028e+07	7.71169e+07	8.599e+07	5.68377e+07	6.67187e+07	7.65864e+07	9.57466e+07	7.84506e+07	1.64297e+08	6.12242e+07	6.82518e+07	1.14307e+08	5.99934e+07	7.08349e+07	7.05627e+07	1.22007e+08	6.14583e+07	6.23961e+07	5.72328e+07	5.868e+07
LPA(18:0)	3.81	level1			437.265	353	NEG	1.23297e+06	1.24829e+06	3.30817e+06	2.71701e+06	3.77775e+06	4.56595e+06	1.18304e+06	3.60057e+06	2.79415e+06	3.24244e+06	3.24844e+06	3.27389e+06	2.73986e+06	3.66476e+06	4.23137e+06	1.31926e+06	3.86424e+06	955474	3.65139e+06	2.12829e+06	2.77969e+06	3.85918e+06	4.04471e+06	3.0833e+06	3.8688e+06	4.13414e+06	2.90769e+06	3.65861e+06
Dehydrolithocholic acid	3.81	level1			357.277	277.3	POS	9.57404e+06	2.14449e+07	9.3311e+06	1.65403e+07	8.56224e+06	1.84911e+07	1.59252e+07	6.63623e+06	1.18685e+07	9.76746e+06	9.99325e+06	7.76707e+06	2.2526e+07	2.53035e+07	2.81235e+07	3.53471e+07	2.17285e+07	2.42762e+07	1.96652e+07	2.13064e+07	1.91226e+07	1.47254e+07	9.66562e+06	1.05047e+07	1.42315e+07	1.52364e+07	1.37952e+07	1.52164e+07
Dodecanedioic acid	3.81	level1			229.143	234.2	NEG	2.11918e+07	2.27932e+07	2.01359e+07	2.05399e+07	2.37667e+07	2.41536e+07	2.13721e+07	2.50199e+07	2.25528e+07	2.38717e+07	2.37805e+07	1.79325e+07	2.13123e+07	1.80963e+07	2.11683e+07	2.05505e+07	1.98556e+07	1.90854e+07	2.81285e+07	2.7902e+07	3.268e+07	2.93482e+07	2.59135e+07	2.06944e+07	2.25363e+07	2.25874e+07	2.56469e+07	2.32283e+07
10-Hydroxydecanoic acid	3.81	level1			187.133	209.8	NEG	3.59482e+07	3.80416e+07	4.36631e+07	3.85904e+07	3.99645e+07	3.74735e+07	5.77926e+07	6.53062e+07	6.59719e+07	7.316e+07	5.85359e+07	5.60912e+07	5.23663e+07	5.45802e+07	4.53689e+07	4.49994e+07	4.34029e+07	4.3259e+07	5.65906e+07	5.79453e+07	4.63509e+07	5.10093e+07	5.00895e+07	6.37101e+07	4.96936e+07	4.98654e+07	4.89524e+07	5.04509e+07
Indole-3-carboxaldehyde	3.81	level1			146.059	189.3	POS	1.57204e+07	1.92817e+07	1.5952e+07	1.72951e+07	1.39899e+07	1.74645e+07	2.94844e+07	3.49464e+07	3.28397e+07	3.62138e+07	2.76189e+07	2.96972e+07	2.18447e+07	2.2549e+07	1.5416e+07	1.77776e+07	1.65e+07	2.24534e+07	2.08e+07	1.79787e+07	1.35554e+07	2.11126e+07	1.93262e+07	2.13643e+07	2.05431e+07	2.29738e+07	2.14624e+07	2.14235e+07
Isoscopoletin	3.81	level1			193.048	174	POS	1.18926e+07	1.74496e+07	7.21415e+06	1.41665e+07	1.16608e+07	1.38923e+07	1.05531e+07	1.02094e+07	8.04629e+06	9.33515e+06	6.94251e+06	5.68983e+06	5.81171e+06	6.0929e+06	9.12483e+06	6.08496e+06	1.00147e+07	1.217e+07	7.80453e+06	7.63308e+06	1.13971e+07	1.13677e+07	8.72774e+06	8.43386e+06	8.96936e+06	9.84093e+06	9.05001e+06	1.01814e+07
(1-Hydroxycyclohexyl)acetic acid	3.81	level1			157.086	169.6	NEG	7.99157e+06	1.07028e+07	8.54028e+06	1.07325e+07	7.07758e+06	8.46836e+06	6.57173e+06	5.84103e+06	3.50805e+07	1.18481e+07	8.81745e+06	7.39957e+06	6.84999e+06	6.83098e+06	7.61384e+06	6.57639e+06	6.37271e+06	8.53951e+06	9.08687e+06	1.03196e+07	1.22982e+07	5.75542e+06	1.36492e+07	5.73069e+06	7.02769e+06	8.47532e+06	1.28008e+07	7.54906e+06
Tyrosine O-sulfate	3.81	level1			260.023	40.6	NEG	1.37242e+07	1.47607e+07	1.36588e+07	1.58779e+07	8.0201e+06	1.00831e+07	5.46364e+06	8.70141e+06	7.65141e+06	4.92093e+06	8.23314e+06	6.7526e+06	3.20576e+06	1.51652e+06	2.8416e+06	528244	1.74031e+06	1.39504e+06	294738	621042	402524	671737	0	0	5.71069e+06	5.86615e+06	5.76538e+06	5.72712e+06
trans-3'-Hydroxycotinine	3.81	level1			193.096	37.1	POS	6.77544e+07	5.82157e+07	7.67218e+07	6.0955e+07	7.43166e+07	6.25851e+07	7.18203e+07	2.86675e+07	6.3846e+07	6.97668e+07	5.81211e+07	5.82678e+07	4.71092e+07	6.39948e+07	7.75511e+07	7.69051e+07	4.30204e+07	3.69047e+07	7.27424e+07	7.66834e+07	7.52439e+07	8.0403e+07	5.34896e+07	5.60807e+07	5.96334e+07	7.32904e+07	6.58432e+07	6.52906e+07
Betaine	3.81	level1			118.086	24.4	POS	1.28359e+08	1.24277e+08	1.5392e+08	1.02459e+08	1.19698e+08	1.31101e+08	1.51356e+08	1.45025e+08	1.5765e+08	1.80996e+08	1.47134e+08	1.73362e+08	1.20117e+08	1.07276e+08	1.55963e+08	1.33541e+08	1.46281e+08	1.73378e+08	2.11796e+08	2.16516e+08	1.76914e+08	2.27348e+08	2.26532e+08	1.7802e+08	1.64458e+08	1.61709e+08	1.60765e+08	1.61896e+08
Methyl Paraben	3.8	level1			151.04	190	NEG	1.53423e+07	1.58561e+07	1.61279e+07	1.63291e+07	1.52939e+07	1.48712e+07	1.51069e+07	1.68096e+07	1.80606e+07	1.88584e+07	1.89142e+07	1.68388e+07	1.80767e+07	1.25766e+07	1.64205e+07	1.48015e+07	1.32804e+07	1.06446e+07	9.67434e+06	7.78774e+06	8.63325e+06	1.13599e+07	9.75392e+06	1.13368e+07	1.34849e+07	1.40043e+07	1.4505e+07	1.36236e+07
Caplamin	3.8	level1			130.087	28.6	NEG	3.8649e+07	3.70208e+07	3.21931e+07	2.85201e+07	2.78645e+07	4.0329e+07	2.41076e+07	2.75279e+07	2.92246e+07	2.84631e+07	2.50445e+07	1.97945e+07	1.70148e+07	1.61605e+07	2.77084e+07	1.91044e+07	2.36723e+07	3.16875e+07	2.24896e+07	1.97063e+07	2.23752e+07	2.71681e+07	2.6851e+07	1.80063e+07	2.6707e+07	2.77096e+07	2.6634e+07	2.57837e+07
Galactose	3.8	level1			161.045	3.3	NEG	2.4541e+07	2.27091e+07	1.29147e+07	1.19628e+07	1.4759e+07	1.14817e+07	1.37161e+07	2.5092e+07	2.18379e+07	2.15983e+07	1.94903e+07	2.04827e+07	1.02223e+07	2.16325e+07	1.21061e+07	9.46193e+06	1.10693e+07	1.04412e+07	1.0175e+07	2.30592e+07	1.30416e+07	1.10622e+07	2.32412e+07	1.36861e+07	1.93986e+07	1.21399e+07	2.29516e+07	1.08777e+07
3-Methyluridine	3.8	level1			257.077	36.1	NEG	1.10944e+07	9.46357e+06	1.1645e+07	1.03287e+07	9.75412e+06	9.57318e+06	7.74842e+06	6.83821e+06	9.06165e+06	9.37351e+06	8.45476e+06	8.47819e+06	6.3948e+06	6.03362e+06	5.88913e+06	7.75785e+06	8.45381e+06	7.85673e+06	5.07681e+06	4.59372e+06	5.29968e+06	5.74056e+06	6.69778e+06	6.00125e+06	8.10568e+06	7.90007e+06	8.31521e+06	8.17426e+06
5-Oxooctanoic acid	3.8	level1			157.086	169.6	NEG	7.99157e+06	1.07028e+07	8.54028e+06	1.07325e+07	7.07758e+06	8.46836e+06	6.57173e+06	5.84103e+06	3.50805e+07	1.18481e+07	8.81745e+06	7.39957e+06	6.84999e+06	6.83098e+06	7.61384e+06	6.57639e+06	6.37271e+06	8.53951e+06	9.08687e+06	1.03196e+07	1.22982e+07	5.75542e+06	1.36492e+07	5.73069e+06	7.02769e+06	8.47532e+06	1.28008e+07	7.54906e+06
N-Formylnornicotine	3.8	level1			177.101	45.1	POS	3.84759e+09	2.95491e+09	3.04692e+09	2.17041e+09	3.61186e+09	3.50124e+09	3.5697e+09	5.31786e+09	2.67232e+09	3.92368e+09	3.25318e+09	3.27976e+09	4.93017e+09	6.51687e+09	6.20841e+09	6.02294e+09	6.26101e+09	1.16326e+10	5.08946e+09	3.9173e+09	5.72466e+09	9.61949e+09	5.60792e+09	3.50681e+09	4.56753e+09	4.74741e+09	4.87833e+09	4.71661e+09
Val-Ile	3.8	level1			231.169	39.8	POS	1.93841e+07	1.5869e+07	1.35517e+07	1.6008e+07	8.98266e+06	1.30348e+07	7.23438e+06	8.73151e+06	9.73544e+06	1.0054e+07	9.71826e+06	5.45212e+06	3.98168e+06	2.08354e+06	2.46961e+06	1.50155e+06	3.16417e+06	0	2.64126e+06	1.4442e+06	817389	1.2814e+06	2.06731e+06	8.54492e+06	3.9439e+06	4.72661e+06	5.60476e+06	5.95421e+06
DL-m-Tyrosine	3.8	level1			182.081	35.2	POS	5.93266e+06	6.34155e+06	7.25965e+06	6.81199e+06	7.57264e+06	4.02965e+06	1.27949e+07	8.65807e+06	2.99329e+07	9.50615e+06	1.12181e+07	3.43596e+07	1.32968e+07	1.94437e+07	7.12384e+06	1.05804e+07	1.13829e+07	8.03193e+06	7.42213e+06	9.75147e+06	5.79961e+06	1.0531e+07	8.57272e+06	8.87264e+06	7.76982e+06	7.56356e+06	9.82846e+06	5.31994e+06
Nicotine	3.8	level1			163.122	27.8	POS	9.84073e+10	8.93976e+10	8.65121e+10	8.98612e+10	9.22299e+10	9.71301e+10	7.13168e+10	6.6458e+10	8.01102e+10	7.34596e+10	7.27405e+10	7.16489e+10	6.33024e+10	6.48656e+10	6.73918e+10	6.4009e+10	6.73926e+10	6.52918e+10	8.34874e+10	8.09292e+10	7.75171e+10	6.64016e+10	6.79863e+10	7.33234e+10	7.696e+10	7.31805e+10	8.32932e+10	7.36766e+10
Trimethylamine N-oxide	3.8	level1			76.0753	24.5	POS	7.00093e+07	7.58006e+07	8.22944e+07	7.75736e+07	9.74599e+07	5.99191e+07	7.48973e+07	7.00818e+07	9.28226e+07	7.39305e+07	1.02662e+08	9.24357e+07	9.81207e+07	1.51902e+08	6.0199e+07	8.50614e+07	7.47187e+07	8.76649e+07	2.26998e+07	1.06715e+07	9.65149e+06	5.94072e+07	3.89789e+07	7.4186e+07	7.61025e+07	7.67037e+07	6.99049e+07	6.89863e+07
Phosphate	3.8	level1			96.9691	24.3	NEG	3.38056e+07	7.19493e+07	1.55569e+08	9.0147e+07	9.87968e+07	8.21241e+07	5.83212e+07	4.35475e+07	6.06702e+07	5.09131e+07	5.6297e+07	5.00875e+07	5.81451e+07	6.85266e+07	4.88824e+07	6.44024e+07	6.59755e+07	9.55316e+07	1.9296e+07	2.81864e+07	3.57138e+07	6.14467e+07	9.84099e+06	3.13702e+07	4.65935e+07	3.7143e+07	2.67613e+07	5.62845e+07
Choline	3.8	level1			104.106	23.5	POS	4.17789e+08	4.1878e+08	3.68768e+08	3.3849e+08	4.1877e+08	5.00443e+08	3.79362e+08	4.02603e+08	4.26933e+08	3.97315e+08	3.92596e+08	3.01801e+08	2.91495e+08	2.49431e+08	4.47491e+08	4.0808e+08	3.96609e+08	3.69536e+08	4.56975e+08	5.31701e+08	6.39527e+08	4.37865e+08	4.35805e+08	2.98611e+08	4.06493e+08	4.1856e+08	4.02975e+08	3.95025e+08
Arginine	3.8	level1			175.118	23.2	POS	2.22342e+07	2.41407e+07	1.22404e+07	2.00577e+07	1.49923e+07	1.65487e+07	1.53144e+07	1.86702e+07	1.33166e+07	1.49743e+07	1.09983e+07	1.06697e+07	8.56404e+06	7.72405e+06	8.57791e+06	7.63274e+06	1.12208e+07	1.84884e+07	8.14183e+06	7.35497e+06	7.09029e+06	2.48283e+07	2.12546e+07	1.78919e+07	1.48464e+07	1.20234e+07	1.62742e+07	1.46892e+07
Sarcosine	3.8	level1			90.0544	22.9	POS	1.02946e+07	9.49143e+06	7.9964e+06	7.85674e+06	6.95329e+06	9.04157e+06	6.31257e+06	6.26017e+06	6.80376e+06	7.77503e+06	7.0618e+06	5.39372e+06	5.22618e+06	3.56838e+06	7.07913e+06	4.91555e+06	5.9073e+06	7.85577e+06	6.27888e+06	5.60436e+06	5.69455e+06	8.39355e+06	7.74511e+06	5.98879e+06	7.21146e+06	7.38814e+06	7.66883e+06	8.48159e+06
Alanine	3.8	level1			90.0544	22.9	POS	1.02946e+07	9.49143e+06	7.9964e+06	7.85674e+06	6.95329e+06	9.04157e+06	6.31257e+06	6.26017e+06	6.80376e+06	7.77503e+06	7.0618e+06	5.39372e+06	5.22618e+06	3.56838e+06	7.07913e+06	4.91555e+06	5.9073e+06	7.85577e+06	6.27888e+06	5.60436e+06	5.69455e+06	8.39355e+06	7.74511e+06	5.98879e+06	7.21146e+06	7.38814e+06	7.66883e+06	8.48159e+06
3-Ureidopropionic acid	3.8	level1			131.046	22.7	NEG	7.63709e+06	1.5169e+07	5.2865e+06	1.18811e+07	5.06704e+06	1.13295e+07	5.1278e+06	1.41652e+07	2.31288e+06	1.12861e+07	2.81203e+06	3.82591e+06	3.67182e+06	3.00607e+06	8.96102e+06	4.06489e+06	6.77195e+06	9.01892e+06	1.39583e+07	1.68991e+07	1.48489e+07	2.02434e+07	2.10797e+07	2.21219e+07	9.82333e+06	9.85802e+06	8.53051e+06	1.02295e+07
(2S,3R,4S,5R)-2-Amino-3,4,5,6-tetrahydroxyhexanal hydrochloride	3.8	level1			180.086	22.5	POS	1.52033e+06	1.57487e+06	1.82373e+06	1.96619e+06	1.31836e+06	1.52834e+06	1.1135e+06	1.08157e+06	1.06117e+06	1.14423e+06	1.11506e+06	1.14195e+06	909132	871238	1.46288e+06	1.16784e+06	1.16034e+06	1.25898e+06	1.08045e+06	1.53927e+06	1.07784e+06	1.51197e+06	1.31838e+06	1.18808e+06	1.32244e+06	1.16426e+06	1.14499e+06	1.10544e+06
Aspartate	3.8	level1			134.044	22.3	POS	1.97955e+07	1.70062e+07	1.47518e+07	1.26019e+07	1.17722e+07	1.6045e+07	1.35123e+07	1.42929e+07	1.39614e+07	1.4336e+07	1.57889e+07	1.57609e+07	1.09634e+07	1.15433e+07	1.27271e+07	7.19081e+06	9.88039e+06	1.95056e+07	8.78677e+06	6.45761e+06	7.44239e+06	1.78746e+07	1.66593e+07	1.42455e+07	1.36095e+07	1.23951e+07	1.58157e+07	1.28243e+07
2-Hydroxyglutaric acid	3.79	level1			147.029	26.6	NEG	4.99573e+07	5.15138e+07	5.55909e+07	3.93809e+07	5.23409e+07	5.50504e+07	4.35654e+07	3.40864e+07	3.9834e+07	4.77989e+07	3.94046e+07	5.72234e+07	4.70702e+07	4.8106e+07	5.97808e+07	6.47688e+07	5.487e+07	6.1885e+07	7.94463e+07	8.96709e+07	8.69863e+07	6.83897e+07	7.15272e+07	5.41031e+07	5.38061e+07	4.86142e+07	5.08436e+07	5.59242e+07
4-(dimethylamino)butanoate	3.79	level1			130.087	28.6	NEG	3.8649e+07	3.70208e+07	3.21931e+07	2.85201e+07	2.78645e+07	4.0329e+07	2.41076e+07	2.75279e+07	2.92246e+07	2.84631e+07	2.50445e+07	1.97945e+07	1.70148e+07	1.61605e+07	2.77084e+07	1.91044e+07	2.36723e+07	3.16875e+07	2.24896e+07	1.97063e+07	2.23752e+07	2.71681e+07	2.6851e+07	1.80063e+07	2.6707e+07	2.77096e+07	2.6634e+07	2.57837e+07
Glucose	3.79	level1			161.045	3.3	NEG	2.4541e+07	2.27091e+07	1.29147e+07	1.19628e+07	1.4759e+07	1.14817e+07	1.37161e+07	2.5092e+07	2.18379e+07	2.15983e+07	1.94903e+07	2.04827e+07	1.02223e+07	2.16325e+07	1.21061e+07	9.46193e+06	1.10693e+07	1.04412e+07	1.0175e+07	2.30592e+07	1.30416e+07	1.10622e+07	2.32412e+07	1.36861e+07	1.93986e+07	1.21399e+07	2.29516e+07	1.08777e+07
Fructose	3.79	level1			161.045	3.3	NEG	2.4541e+07	2.27091e+07	1.29147e+07	1.19628e+07	1.4759e+07	1.14817e+07	1.37161e+07	2.5092e+07	2.18379e+07	2.15983e+07	1.94903e+07	2.04827e+07	1.02223e+07	2.16325e+07	1.21061e+07	9.46193e+06	1.10693e+07	1.04412e+07	1.0175e+07	2.30592e+07	1.30416e+07	1.10622e+07	2.32412e+07	1.36861e+07	1.93986e+07	1.21399e+07	2.29516e+07	1.08777e+07
Mannose	3.79	level1			161.045	3.3	NEG	2.4541e+07	2.27091e+07	1.29147e+07	1.19628e+07	1.4759e+07	1.14817e+07	1.37161e+07	2.5092e+07	2.18379e+07	2.15983e+07	1.94903e+07	2.04827e+07	1.02223e+07	2.16325e+07	1.21061e+07	9.46193e+06	1.10693e+07	1.04412e+07	1.0175e+07	2.30592e+07	1.30416e+07	1.10622e+07	2.32412e+07	1.36861e+07	1.93986e+07	1.21399e+07	2.29516e+07	1.08777e+07
Ile-Leu	3.79	level1			245.184	88.2	POS	2.67272e+07	1.28177e+07	1.62813e+07	1.75233e+07	1.42455e+07	2.64242e+07	9.12643e+06	1.34599e+07	6.86911e+06	9.45258e+06	1.01491e+07	4.94507e+06	6.00361e+06	4.04436e+06	7.22114e+06	4.31095e+06	7.54237e+06	1.01837e+07	2.06206e+06	923359	1.02822e+06	1.12666e+07	7.62006e+06	8.22296e+06	1.02263e+07	8.99176e+06	9.60973e+06	1.05554e+07
Imidazol-1-yl-acetic acid	3.79	level1			127.05	37.1	POS	1.57435e+07	1.15267e+07	1.36242e+07	1.20097e+07	9.47829e+06	6.89385e+06	2.84491e+07	2.5369e+07	2.71837e+07	2.39061e+07	2.22623e+07	2.65221e+07	3.37615e+07	2.69289e+07	2.08136e+07	2.02363e+07	2.12596e+07	2.03595e+07	1.25426e+07	1.3107e+07	1.34072e+07	1.81108e+07	1.87968e+07	1.70509e+07	1.66626e+07	2.29095e+07	1.8643e+07	1.99268e+07
Adenine	3.79	level1			136.061	33.1	POS	3.59621e+07	4.01747e+07	2.9876e+07	4.02339e+07	3.50179e+07	2.67313e+07	4.98201e+07	5.6225e+07	4.21613e+07	4.67488e+07	4.33219e+07	4.08013e+07	4.42435e+07	4.10525e+07	4.54272e+07	3.77765e+07	4.03595e+07	4.97611e+07	2.59846e+07	2.87991e+07	2.90945e+07	4.47002e+07	3.93873e+07	3.6423e+07	3.94234e+07	4.07054e+07	4.53385e+07	3.89213e+07
Stearic acid	3.79	level1			283.263	336.5	NEG	3.66044e+08	2.07282e+08	3.15509e+08	2.85752e+08	3.30389e+08	1.9471e+08	2.35239e+08	4.63539e+08	3.85118e+08	3.55149e+08	4.70124e+08	3.04316e+08	3.02315e+08	1.88465e+08	1.71743e+08	2.2631e+08	2.35385e+08	2.57662e+08	1.58279e+08	1.3252e+08	2.38479e+08	2.20191e+08	3.1129e+08	2.69356e+08	2.02245e+08	2.39254e+08	3.39909e+08	3.48406e+08
NAE(16:0)	3.79	level1			300.288	304.8	POS	5.77228e+06	6.37835e+06	7.68285e+06	6.82823e+06	7.75551e+06	5.92322e+06	1.00628e+07	1.0418e+07	1.13501e+07	9.32007e+06	1.17359e+07	8.22491e+06	6.42145e+06	7.78684e+06	4.79905e+06	5.62651e+06	6.35972e+06	5.77082e+06	4.36387e+06	4.24863e+06	4.29822e+06	8.24316e+06	6.55952e+06	9.22165e+06	6.80538e+06	7.85759e+06	7.50052e+06	6.68721e+06
Mono(2-ethylhexyl) phthalate	3.79	level1			279.157	271.9	POS	7.22498e+06	9.9435e+06	7.78923e+06	8.84335e+06	8.89577e+06	9.56785e+06	1.42619e+07	1.26015e+07	1.49777e+07	1.4295e+07	1.34309e+07	1.17688e+07	1.181e+07	8.12223e+06	8.02328e+06	7.98693e+06	9.12858e+06	8.04193e+06	8.13966e+06	1.06054e+07	1.08204e+07	9.6027e+06	8.16974e+06	8.5528e+06	9.0129e+06	9.63332e+06	9.35152e+06	1.0795e+07
Gingerol	3.79	level1			293.174	225.2	NEG	1.17737e+07	1.77267e+07	1.71741e+07	1.37475e+07	1.81487e+07	1.50151e+07	1.02414e+07	8.74659e+06	1.17636e+07	1.09068e+07	1.45094e+07	8.74917e+06	1.12626e+07	1.15595e+07	1.40575e+07	1.37961e+07	1.31196e+07	8.58864e+06	1.17219e+07	9.65983e+06	1.07323e+07	9.92241e+06	1.05306e+07	9.25501e+06	1.2249e+07	1.26072e+07	1.1875e+07	1.26383e+07
Betaxolol	3.79	level1			308.221	203.8	POS	9.14352e+06	1.02246e+07	9.98168e+06	1.13037e+07	1.49522e+07	9.4859e+06	1.14271e+07	1.1349e+07	1.44845e+07	1.28429e+07	1.1111e+07	9.54227e+06	1.22829e+07	1.50523e+07	1.03336e+07	1.5932e+07	1.35146e+07	1.20607e+07	1.02699e+07	1.01164e+07	1.14724e+07	1.22581e+07	1.09755e+07	1.15725e+07	1.20815e+07	1.13162e+07	1.15097e+07	1.22779e+07
Tosufloxacin (tosylate hydrate)	3.79	level1			387.105	193.3	POS	6.31312e+06	6.34688e+06	9.85603e+06	8.799e+06	1.32323e+07	6.78181e+06	1.43198e+07	1.23902e+07	1.5649e+07	1.90046e+07	1.70805e+07	2.10533e+07	7.98639e+06	1.51567e+07	6.00759e+06	4.97729e+06	8.59533e+06	4.06732e+06	5.85942e+06	5.93619e+06	5.29431e+06	4.84694e+06	5.07933e+06	6.02697e+06	7.59155e+06	9.50973e+06	9.039e+06	8.68444e+06
N-Acetyltryptophan	3.79	level1			245.092	168.3	NEG	9.36314e+09	1.05336e+10	7.58393e+09	8.75316e+09	8.969e+09	9.08102e+09	9.79054e+09	9.89172e+09	9.80717e+09	7.9627e+09	9.54685e+09	7.08241e+09	1.05584e+10	1.27107e+10	1.1414e+10	1.1715e+10	1.10301e+10	1.43429e+10	9.10422e+09	8.0099e+09	9.8468e+09	1.40344e+10	1.15119e+10	1.18811e+10	1.01045e+10	1.01303e+10	1.00451e+10	1.03618e+10
3-Isopropylmalic acid	3.79	level1			175.06	83.6	NEG	2.34543e+08	1.70571e+08	2.14776e+08	1.48498e+08	1.66323e+08	2.04234e+08	1.56621e+08	1.62798e+08	1.47405e+08	2.39413e+08	2.14599e+08	1.69321e+08	1.47997e+08	1.78275e+08	1.8371e+08	1.31703e+08	1.53983e+08	2.4255e+08	1.72186e+08	1.42956e+08	1.80244e+08	1.64542e+08	1.32085e+08	1.41085e+08	1.58547e+08	1.90274e+08	2.00139e+08	1.60677e+08
DZ2002	3.79	level1			232.082	45.6	NEG	1.06789e+07	1.31795e+07	8.86638e+06	1.43106e+07	7.21065e+06	1.24962e+07	5.95696e+06	6.50372e+06	7.41392e+06	6.87132e+06	5.81194e+06	4.85853e+06	5.20369e+06	4.70952e+06	5.93516e+06	5.66914e+06	6.70272e+06	7.46374e+06	8.19652e+06	9.0215e+06	1.0484e+07	1.7441e+06	7.30503e+06	6.43636e+06	7.45855e+06	7.74659e+06	1.10814e+07	7.37229e+06
Stachydrine	3.79	level1			144.101	25.1	POS	4.06252e+07	4.38765e+07	4.85982e+07	3.5738e+07	4.02292e+07	5.09034e+07	5.40414e+07	3.75309e+07	5.08523e+07	4.3371e+07	3.60603e+07	4.83016e+07	3.46136e+07	3.97819e+07	5.46392e+07	5.69879e+07	5.67649e+07	4.634e+07	6.62324e+07	8.18635e+07	6.75585e+07	4.53151e+07	5.08117e+07	5.29512e+07	4.50942e+07	4.93481e+07	5.04069e+07	5.04816e+07
Dodecyl gallate	3.78	level1			337.204	308.1	NEG	2.99787e+06	2.55275e+06	4.48633e+06	3.23749e+06	4.65362e+06	3.24464e+06	4.03643e+06	6.86773e+06	1.0799e+07	6.57292e+06	3.15435e+06	5.83776e+06	3.75327e+07	4.21786e+07	1.39641e+07	2.5248e+07	1.89735e+07	3.32021e+07	3.12834e+07	1.61326e+07	9.83482e+06	2.66031e+07	1.19844e+07	3.65072e+07	1.54517e+07	1.50648e+07	1.55377e+07	1.45271e+07
Palmitamide	3.78	level1			256.262	307.6	POS	4.49535e+07	4.10313e+07	4.72158e+07	4.50493e+07	4.40222e+07	3.79087e+07	5.61953e+07	5.93652e+07	6.98541e+07	6.55776e+07	5.51184e+07	5.39167e+07	4.27525e+07	5.34246e+07	3.90012e+07	3.64373e+07	3.89488e+07	3.97063e+07	3.11148e+07	2.96252e+07	3.1522e+07	4.14466e+07	3.56135e+07	4.33203e+07	4.47616e+07	4.75382e+07	4.30844e+07	4.47566e+07
Linoleamide	3.78	level1			280.262	298.3	POS	9.94236e+06	1.07609e+07	1.24084e+07	1.04513e+07	1.27303e+07	1.05427e+07	1.65992e+07	1.39604e+07	1.60401e+07	1.47461e+07	1.27548e+07	1.41879e+07	1.25815e+07	1.91856e+07	1.10671e+07	1.21435e+07	1.23256e+07	1.25761e+07	8.12017e+06	8.51503e+06	7.72331e+06	1.04542e+07	9.37049e+06	1.09591e+07	1.10208e+07	1.24687e+07	1.22836e+07	1.12991e+07
3-Oxocholic acid	3.78	level1			405.263	269.2	NEG	2.54977e+06	3.00138e+06	1.96354e+06	2.05159e+06	2.65935e+06	2.24049e+06	2.11991e+06	2.95951e+06	2.59371e+06	2.17317e+06	2.1851e+06	1.20746e+06	1.07209e+06	664985	2.05663e+06	1.38878e+06	1.8793e+06	2.77625e+06	1.18712e+06	655423	967052	2.17645e+06	1.70031e+06	1.55601e+06	1.99191e+06	2.15064e+06	1.26627e+06	2.04184e+06
Torachrysone-8-O-b-D-glucoside	3.78	level1			389.125	186.1	NEG	8.61881e+06	7.93682e+06	7.64192e+06	4.53774e+06	7.00917e+06	9.5792e+06	6.48751e+06	4.5404e+06	6.46247e+06	6.79724e+06	5.13264e+06	4.48572e+06	6.37211e+06	6.04329e+06	1.0144e+07	9.77835e+06	1.20485e+07	8.42718e+06	1.06339e+07	1.66426e+07	1.36364e+07	7.07728e+06	5.91618e+06	8.10871e+06	7.52361e+06	9.33134e+06	6.63692e+06	8.44871e+06
Suberic acid	3.78	level1			155.071	178.4	NEG	2.06754e+06	1.33471e+06	1.95399e+06	956488	1.39586e+06	2.23353e+06	1.27877e+06	1.27815e+06	2.34634e+06	2.87331e+06	2.02998e+06	1.79236e+06	1.61096e+06	2.43817e+06	1.85608e+06	1.34199e+06	1.68087e+06	1.71345e+06	2.74922e+06	2.67566e+06	2.78092e+06	1.65385e+06	1.81979e+06	2.89648e+06	2.16996e+06	1.90187e+06	1.70261e+06	2.21293e+06
2,2'-Bipyridine	3.78	level1			157.075	163.4	POS	2.46141e+09	2.33916e+09	2.53066e+09	2.06685e+09	2.23185e+09	2.6172e+09	2.04237e+09	1.91949e+09	2.66165e+09	2.44687e+09	2.19027e+09	2.10784e+09	2.02324e+09	2.43114e+09	2.14175e+09	2.03058e+09	1.9542e+09	1.79202e+09	2.4669e+09	2.7477e+09	2.69632e+09	1.98028e+09	1.96395e+09	2.02352e+09	2.17557e+09	2.19554e+09	2.21081e+09	2.26375e+09
Leucylphenylalanine	3.78	level1			279.168	156	POS	3.22531e+07	3.08634e+07	2.78631e+07	2.70355e+07	2.1855e+07	2.98175e+07	1.99448e+07	2.67519e+07	1.95106e+07	2.20207e+07	1.91281e+07	1.51422e+07	1.39532e+07	1.29455e+07	1.66708e+07	1.14563e+07	1.4945e+07	2.06311e+07	1.5467e+07	1.14371e+07	1.10278e+07	2.29535e+07	1.93595e+07	1.92267e+07	2.05261e+07	2.00584e+07	2.0082e+07	2.08201e+07
3,3-Dimethylglutaric acid	3.78	level1			159.065	152.8	NEG	9.91265e+07	1.14061e+08	1.41193e+08	8.00208e+07	8.60407e+07	1.27463e+08	1.43728e+08	1.32483e+08	1.35562e+08	1.49284e+08	1.28169e+08	1.40875e+08	1.25758e+08	1.20002e+08	1.15827e+08	1.0076e+08	1.03316e+08	9.7837e+07	1.6433e+08	1.62462e+08	1.33725e+08	1.21322e+08	1.2825e+08	1.05358e+08	1.1546e+08	1.20814e+08	1.22408e+08	1.13799e+08
Kynurenic acid	3.78	level1			188.035	119.1	NEG	1.1305e+08	1.24684e+08	1.18156e+08	1.2247e+08	9.23298e+07	1.55255e+08	1.20923e+08	1.5955e+08	1.96714e+08	2.6823e+08	1.45386e+08	1.39346e+08	1.18214e+08	1.12716e+08	9.3964e+07	7.53505e+07	7.96589e+07	1.4953e+08	1.47648e+08	1.6293e+08	1.47603e+08	1.28984e+08	9.84999e+07	1.05075e+08	1.25393e+08	1.20001e+08	1.25432e+08	1.29472e+08
2-Methylcyclopentane-1,3-dione	3.78	level1			113.059	58.3	POS	1.29293e+07	1.43344e+07	1.48064e+07	1.414e+07	1.1764e+07	1.24164e+07	2.05416e+07	1.49024e+07	1.44993e+07	1.374e+07	1.54176e+07	1.29892e+07	1.41347e+07	1.50051e+07	1.4915e+07	1.46655e+07	1.77821e+07	1.48704e+07	1.63533e+07	1.46683e+07	1.34138e+07	1.60116e+07	1.52913e+07	1.58811e+07	1.53136e+07	1.75026e+07	1.35399e+07	1.91867e+07
Nornicotine	3.78	level1			149.106	27.2	POS	9.62624e+08	1.12097e+09	8.34583e+08	9.44934e+08	1.54179e+09	7.64103e+08	2.30105e+09	6.67117e+09	1.18355e+09	2.75497e+09	2.60856e+09	1.42586e+09	4.08877e+09	4.09577e+09	4.07265e+09	4.36117e+09	4.30866e+09	7.62418e+09	2.55138e+09	1.6245e+09	1.93286e+09	6.33434e+09	4.92266e+09	2.02586e+09	3.3213e+09	3.25585e+09	2.71422e+09	3.0577e+09
myo-Inositol	3.78	level1			179.055	24.1	NEG	3.27989e+07	3.59656e+07	3.71449e+07	2.92903e+07	3.83148e+07	3.73614e+07	3.74853e+07	4.56225e+07	4.08272e+07	4.29445e+07	4.06675e+07	3.90699e+07	3.14469e+07	2.86097e+07	3.61022e+07	3.35191e+07	3.25304e+07	3.99278e+07	3.19507e+07	4.19919e+07	3.47498e+07	3.18245e+07	3.12105e+07	3.16247e+07	3.24796e+07	3.37647e+07	3.48701e+07	3.4137e+07
Phloroglucinol	3.78	level1			127.038	14.9	POS	1.7074e+07	2.02888e+07	2.18618e+07	2.20383e+07	3.68177e+07	1.96236e+07	3.65287e+07	2.06004e+07	2.26536e+07	2.01848e+07	2.15513e+07	2.33869e+07	2.15752e+07	1.7614e+07	1.91564e+07	3.28736e+07	3.72745e+07	2.15696e+07	1.94867e+07	2.07472e+07	2.15442e+07	3.62168e+07	3.48848e+07	3.77335e+07	1.51057e+07	2.19109e+07	1.94643e+07	2.27026e+07
2-Hydroxy-3-methylbutyric acid	3.77	level1			117.055	46.8	NEG	1.45392e+07	1.36222e+07	2.49501e+07	1.58982e+07	1.2508e+07	5.43333e+06	2.16099e+07	3.24384e+07	3.26907e+07	1.44321e+07	2.04787e+07	1.51086e+07	2.86815e+07	3.27055e+07	1.25181e+07	1.50942e+07	1.37046e+07	2.80751e+07	1.68855e+07	2.01271e+07	1.39177e+07	7.59682e+06	1.44264e+07	1.2118e+07	1.55214e+07	1.76308e+07	1.51464e+07	1.83668e+07
Valnoctamide	3.77	level1			144.137	224.3	POS	3.1878e+06	3.19975e+06	2.9453e+06	3.57948e+06	3.6933e+06	3.18168e+06	3.83389e+06	2.31329e+06	3.3328e+06	3.57303e+06	2.25686e+06	2.98457e+06	3.50914e+06	4.12949e+06	2.90107e+06	3.22708e+06	3.70441e+06	3.14439e+06	3.61381e+06	4.25585e+06	3.3039e+06	3.2427e+06	1.54862e+06	3.1003e+06	3.65664e+06	3.78493e+06	3.86668e+06	3.75307e+06
Camptothecin	3.77	level1			349.116	197.3	POS	3.42015e+07	3.6237e+07	3.16149e+07	3.90347e+07	1.77311e+07	2.98942e+07	4.51684e+07	4.43413e+07	3.16747e+07	5.12463e+07	2.91865e+07	2.82044e+07	1.20682e+07	1.20484e+07	1.31223e+07	1.41172e+06	8.76663e+06	1.76873e+07	1.86909e+07	1.36861e+07	1.36005e+07	4.83527e+07	4.47667e+07	4.79169e+07	2.62261e+07	2.86681e+07	2.76107e+07	2.81082e+07
Phenol	3.77	level1			93.0341	140.5	NEG	3.5752e+07	4.0288e+07	3.30971e+07	3.86773e+07	3.58291e+07	4.37437e+07	3.74685e+07	3.85631e+07	4.85814e+07	4.73476e+07	4.15284e+07	3.54549e+07	3.12395e+07	2.8219e+07	3.38932e+07	3.40774e+07	3.09101e+07	3.15981e+07	2.16606e+07	2.53441e+07	3.10054e+07	2.0262e+07	1.74243e+07	1.49682e+07	3.13514e+07	3.3382e+07	3.19502e+07	3.21096e+07
2-methylcitrate	3.77	level1			205.034	25.4	NEG	1.10396e+06	3.64106e+06	4.20572e+06	4.09882e+06	378213	3.40666e+06	479766	861773	284779	855976	392279	2.81231e+06	296138	281853	543718	543295	688456	645447	1.26095e+06	2.74139e+06	1.10854e+06	975902	1.35629e+06	1.88582e+06	748815	351480	980116	911032
Pyrogallol	3.76	level1			127.038	14.9	POS	1.7074e+07	2.02888e+07	2.18618e+07	2.20383e+07	3.68177e+07	1.96236e+07	3.65287e+07	2.06004e+07	2.26536e+07	2.01848e+07	2.15513e+07	2.33869e+07	2.15752e+07	1.7614e+07	1.91564e+07	3.28736e+07	3.72745e+07	2.15696e+07	1.94867e+07	2.07472e+07	2.15442e+07	3.62168e+07	3.48848e+07	3.77335e+07	1.51057e+07	2.19109e+07	1.94643e+07	2.27026e+07
9-Oxooctadecanoic acid	3.76	level1			297.242	308.8	NEG	1.17662e+09	9.18358e+08	1.122e+09	8.54523e+08	1.41051e+09	1.46799e+09	1.20251e+09	1.18128e+09	1.54473e+09	1.85978e+09	1.40924e+09	1.50921e+09	1.10577e+09	1.13307e+09	1.67196e+09	1.63401e+09	1.3046e+09	1.08791e+09	1.95233e+09	2.10213e+09	2.28194e+09	2.15287e+09	1.98957e+09	1.49537e+09	1.49779e+09	1.52324e+09	1.44552e+09	1.41712e+09
Lithocholic acid 3-sulfate	3.76	level1			455.245	279.7	NEG	2.36899e+06	2.26489e+06	1.95173e+06	1.86657e+06	2.35239e+06	3.71676e+06	1.41709e+06	1.36329e+06	2.39395e+06	2.32417e+06	1.84729e+06	2.02528e+06	1.40857e+06	1.89355e+06	1.27104e+06	1.36236e+06	1.31953e+06	1.52481e+06	1.29161e+06	1.48013e+06	2.14577e+06	1.0316e+06	702063	724775	1.51913e+06	1.76145e+06	1.72206e+06	1.62244e+06
12(S)-HHTrE	3.76	level1			279.195	259.9	NEG	9.19858e+07	9.42977e+07	8.16411e+07	7.79961e+07	6.58055e+07	9.14399e+07	5.415e+07	5.75725e+07	9.58604e+07	6.48961e+07	5.85343e+07	5.93671e+07	7.04846e+07	7.60491e+07	8.32282e+07	7.26479e+07	6.66728e+07	6.74021e+07	7.41042e+07	7.92211e+07	6.21016e+07	5.69392e+07	5.52889e+07	5.62998e+07	7.3664e+07	7.19567e+07	7.33632e+07	7.37923e+07
Celecoxib	3.76	level1			380.07	236.2	NEG	0	0	0	0	0	0	0	0	0	0	0	0	3.57934e+07	4.55155e+07	1.48485e+07	2.62042e+07	2.05333e+07	3.29364e+07	1.93338e+07	1.2662e+07	5.01552e+06	8.40536e+06	4.69017e+06	1.74234e+07	9.6128e+06	9.4297e+06	9.16974e+06	9.56497e+06
Salicyluric acid	3.76	level1			194.045	172.9	NEG	4.24959e+06	3.88782e+06	5.033e+06	3.22827e+06	4.13892e+06	4.41447e+06	3.869e+06	2.43288e+06	5.04346e+06	4.17727e+06	4.42631e+06	4.09806e+06	5.27349e+06	5.65116e+06	6.22899e+06	5.87977e+06	4.78235e+06	4.30859e+06	6.36825e+06	7.34745e+06	8.74581e+06	4.83024e+06	5.90872e+06	4.15652e+06	4.77571e+06	4.32717e+06	5.18567e+06	5.04078e+06
Hydroferulic acid	3.76	level1			195.066	155.6	NEG	6.25248e+06	5.93903e+06	5.30204e+06	8.61429e+06	6.04369e+06	5.42973e+06	5.20276e+06	4.65238e+06	9.52554e+06	5.46615e+06	6.55679e+06	5.53494e+06	4.02961e+06	3.69281e+06	3.57466e+06	3.83999e+06	4.85555e+06	7.51959e+06	4.48351e+06	4.2791e+06	5.01189e+06	4.47096e+06	5.27269e+06	5.94239e+06	5.15976e+06	4.91319e+06	6.43435e+06	7.21646e+06
3-Hydroxyhippuric acid	3.76	level1			194.045	79.5	NEG	2.06206e+07	1.67612e+07	2.31497e+07	1.24536e+07	1.58758e+07	2.42725e+07	1.02917e+07	1.16617e+07	1.46335e+07	1.31489e+07	1.61101e+07	2.14268e+07	1.55975e+07	1.57637e+07	1.47863e+07	1.5567e+07	1.85389e+07	1.70262e+07	2.779e+07	2.36197e+07	2.88973e+07	1.57828e+07	2.44047e+07	1.66704e+07	1.61589e+07	1.71361e+07	1.53915e+07	1.50244e+07
Levonordefrin	3.76	level1			164.071	36.7	NEG	7.38679e+08	8.54028e+08	3.81783e+08	6.17231e+08	4.72927e+08	4.83964e+08	5.6333e+08	6.04357e+08	4.43918e+08	4.83534e+08	4.02073e+08	2.64956e+08	3.00183e+08	2.17137e+08	3.18719e+08	1.62786e+08	2.76861e+08	4.18558e+08	2.91875e+08	2.02119e+08	3.48064e+08	6.94931e+08	5.6972e+08	5.91911e+08	3.28011e+08	3.55464e+08	5.7413e+08	4.05157e+08
Mannitol	3.76	level1			181.071	30.4	NEG	1.78475e+06	1.1404e+06	4.67603e+06	2.1025e+06	2.24334e+06	3.34031e+06	2.48828e+06	1.4826e+06	1.83045e+06	1.92435e+06	2.20285e+06	4.3639e+06	2.04479e+06	1.81035e+06	7.76877e+06	4.72887e+06	7.04896e+06	4.43951e+06	6.89594e+06	7.092e+06	7.92887e+06	1.01792e+07	9.99335e+06	7.65899e+06	3.31725e+06	2.64904e+06	2.55858e+06	2.85711e+06
Diacetyl	3.76	level1			87.0436	23.1	POS	1.48513e+07	1.39008e+07	1.30581e+07	1.09625e+07	1.26798e+07	1.30771e+07	1.01225e+07	8.945e+06	1.19318e+07	1.10028e+07	1.11657e+07	1.04177e+07	1.04955e+07	9.19152e+06	1.23781e+07	1.14623e+07	1.42958e+07	1.29741e+07	6.51533e+06	8.51568e+06	8.5322e+06	7.30738e+06	8.4654e+06	6.89955e+06	1.18252e+07	1.26708e+07	9.73955e+06	1.04371e+07
2',6'-Dihydroxyacetophenone	3.75	level1			151.04	190	NEG	1.53423e+07	1.58561e+07	1.61279e+07	1.63291e+07	1.52939e+07	1.48712e+07	1.51069e+07	1.68096e+07	1.80606e+07	1.88584e+07	1.89142e+07	1.68388e+07	1.80767e+07	1.25766e+07	1.64205e+07	1.48015e+07	1.32804e+07	1.06446e+07	9.67434e+06	7.78774e+06	8.63325e+06	1.13599e+07	9.75392e+06	1.13368e+07	1.34849e+07	1.40043e+07	1.4505e+07	1.36236e+07
3-Hydroxyphenylacetic acid	3.75	level1			151.04	141.8	NEG	2.35591e+07	2.91002e+07	2.93881e+07	2.56265e+07	2.31186e+07	2.4761e+07	3.29019e+07	3.4695e+07	3.95635e+07	3.37116e+07	4.22709e+07	3.64986e+07	2.36906e+07	1.92538e+07	1.89876e+07	1.09633e+07	1.75393e+07	1.8927e+07	1.15974e+07	1.22713e+07	1.02619e+07	1.4408e+07	1.18832e+07	1.63845e+07	2.39127e+07	2.38379e+07	2.36513e+07	2.35627e+07
5-Phenylisoxazol-3-ol	3.75	level1			160.04	192	NEG	6.8214e+07	6.92179e+07	6.7072e+07	5.76907e+07	6.80497e+07	7.92778e+07	7.85939e+07	9.24335e+07	7.41542e+07	9.46614e+07	7.24619e+07	9.04563e+07	6.10939e+07	5.23779e+07	6.94629e+07	5.65906e+07	6.22112e+07	6.33734e+07	8.63117e+07	8.85279e+07	7.3288e+07	6.26152e+07	7.11e+07	5.79614e+07	7.07237e+07	6.78117e+07	6.92568e+07	6.87351e+07
cis-​9,​10-​Epoxystearic acid	3.75	level1			297.242	308.8	NEG	1.17662e+09	9.18358e+08	1.122e+09	8.54523e+08	1.41051e+09	1.46799e+09	1.20251e+09	1.18128e+09	1.54473e+09	1.85978e+09	1.40924e+09	1.50921e+09	1.10577e+09	1.13307e+09	1.67196e+09	1.63401e+09	1.3046e+09	1.08791e+09	1.95233e+09	2.10213e+09	2.28194e+09	2.15287e+09	1.98957e+09	1.49537e+09	1.49779e+09	1.52324e+09	1.44552e+09	1.41712e+09
Galactitol	3.75	level1			181.071	30.4	NEG	1.78475e+06	1.1404e+06	4.67603e+06	2.1025e+06	2.24334e+06	3.34031e+06	2.48828e+06	1.4826e+06	1.83045e+06	1.92435e+06	2.20285e+06	4.3639e+06	2.04479e+06	1.81035e+06	7.76877e+06	4.72887e+06	7.04896e+06	4.43951e+06	6.89594e+06	7.092e+06	7.92887e+06	1.01792e+07	9.99335e+06	7.65899e+06	3.31725e+06	2.64904e+06	2.55858e+06	2.85711e+06
PC(16:0/18:1(9Z))	3.75	level1			742.583	314.8	POS	4.32881e+06	2.63245e+06	4.46326e+06	4.15555e+06	1.79845e+06	2.84844e+06	2.4048e+06	2.86452e+06	2.8512e+06	2.87769e+06	2.78675e+06	1.9685e+06	4.88258e+06	3.61845e+06	2.41523e+06	3.27446e+06	2.71655e+06	3.05464e+06	3.28854e+06	3.22107e+06	4.16967e+06	2.79719e+06	3.00009e+06	2.75531e+06	3.09192e+06	3.01615e+06	2.76967e+06	3.4714e+06
Retinoic acid (Vitamin A acid)	3.75	level1			301.215	305.6	POS	1.96777e+07	2.05056e+07	2.08571e+07	3.01304e+07	2.29461e+07	1.93047e+07	2.33307e+07	2.60087e+07	2.50842e+07	2.33988e+07	1.95891e+07	3.33803e+07	1.10262e+07	2.47737e+07	3.14487e+07	1.69207e+07	8.64453e+06	1.92322e+07	1.92322e+07	1.60167e+07	9.29537e+06	1.27906e+07	2.49871e+07	2.26532e+07	1.86838e+07	2.85751e+07	1.73884e+07	1.48927e+07
2,5-Di-tert-butylhydroquinone	3.75	level1			221.154	274.7	NEG	6.01243e+06	5.64059e+06	5.82341e+06	4.69553e+06	6.12858e+06	6.42761e+06	4.77912e+06	5.3028e+06	4.5697e+06	6.25302e+06	5.80858e+06	5.2679e+06	5.26542e+06	5.95179e+06	6.21792e+06	5.78979e+06	6.61757e+06	5.8309e+06	7.83352e+06	7.93793e+06	7.37216e+06	6.13093e+06	5.60343e+06	6.40172e+06	6.16837e+06	6.30946e+06	5.2613e+06	6.20123e+06
Rutin	3.75	level1			611.159	180.2	POS	3.00425e+07	3.36044e+07	2.52022e+07	2.81546e+07	3.75659e+07	2.92777e+07	4.65028e+07	4.17086e+07	2.71249e+07	4.85234e+07	6.51506e+07	3.47317e+07	2.80038e+07	3.37266e+07	5.82114e+07	9.5909e+07	7.04017e+07	3.28129e+07	3.72835e+07	4.1054e+07	7.03874e+07	3.39401e+07	2.67186e+07	3.27377e+07	4.07016e+07	4.30017e+07	4.14021e+07	4.19403e+07
Idramantone	3.75	level1			167.106	147.8	POS	4.1616e+06	4.91276e+06	2.81246e+06	7.77534e+06	8.79124e+06	2.9406e+06	5.29372e+06	5.99749e+06	6.5768e+06	5.98503e+06	4.11394e+06	5.06761e+06	5.89909e+06	7.16116e+06	7.77923e+06	6.2972e+06	5.16332e+06	1.07682e+07	7.1104e+06	7.01272e+06	4.50656e+06	6.26734e+06	6.07785e+06	5.19283e+06	6.2057e+06	5.73246e+06	6.40764e+06	6.21285e+06
7-Methylguanosine	3.75	level1			281.112	48.4	POS	1.52759e+07	1.15402e+07	8.31933e+06	1.2109e+07	7.60329e+06	9.21359e+06	1.2858e+07	2.18113e+07	7.21237e+06	1.45115e+07	9.30963e+06	6.71897e+06	8.51549e+06	1.24894e+07	9.85586e+06	1.99885e+06	7.33906e+06	1.52845e+07	9.3657e+06	5.03626e+06	7.43884e+06	2.17466e+07	1.97994e+07	2.0328e+07	1.11343e+07	1.18383e+07	1.32886e+07	1.11214e+07
Picoline	3.75	level1			94.0645	31.3	POS	2.72362e+08	2.59512e+08	2.50534e+08	2.41032e+08	2.37413e+08	2.34214e+08	2.02544e+08	1.9027e+08	2.69021e+08	2.13702e+08	2.1614e+08	2.32055e+08	1.83282e+08	1.57525e+08	2.54343e+08	2.0695e+08	2.03069e+08	1.84857e+08	2.24988e+08	2.29948e+08	2.56454e+08	1.97593e+08	2.08882e+08	2.14731e+08	2.50358e+08	2.15338e+08	2.38274e+08	2.22434e+08
1,2-Anhydro-myo-inositol	3.74	level1			161.045	28	NEG	3.82678e+07	3.96541e+07	4.18329e+07	3.38023e+07	3.85264e+07	3.80016e+07	4.04254e+07	4.28056e+07	3.80668e+07	4.68634e+07	4.14216e+07	4.16043e+07	3.99525e+07	4.34947e+07	4.70613e+07	3.90498e+07	3.81763e+07	4.68473e+07	3.86984e+07	3.98978e+07	3.86152e+07	4.24549e+07	3.67161e+07	4.32612e+07	3.83728e+07	4.02085e+07	3.87454e+07	4.06735e+07
2-indolecarboxylic-acid	3.74	level1			160.04	192	NEG	6.8214e+07	6.92179e+07	6.7072e+07	5.76907e+07	6.80497e+07	7.92778e+07	7.85939e+07	9.24335e+07	7.41542e+07	9.46614e+07	7.24619e+07	9.04563e+07	6.10939e+07	5.23779e+07	6.94629e+07	5.65906e+07	6.22112e+07	6.33734e+07	8.63117e+07	8.85279e+07	7.3288e+07	6.26152e+07	7.11e+07	5.79614e+07	7.07237e+07	6.78117e+07	6.92568e+07	6.87351e+07
2-Isopropylmalic acid	3.74	level1			175.06	83.6	NEG	2.34543e+08	1.70571e+08	2.14776e+08	1.48498e+08	1.66323e+08	2.04234e+08	1.56621e+08	1.62798e+08	1.47405e+08	2.39413e+08	2.14599e+08	1.69321e+08	1.47997e+08	1.78275e+08	1.8371e+08	1.31703e+08	1.53983e+08	2.4255e+08	1.72186e+08	1.42956e+08	1.80244e+08	1.64542e+08	1.32085e+08	1.41085e+08	1.58547e+08	1.90274e+08	2.00139e+08	1.60677e+08
Glucitol	3.74	level1			181.071	30.4	NEG	1.78475e+06	1.1404e+06	4.67603e+06	2.1025e+06	2.24334e+06	3.34031e+06	2.48828e+06	1.4826e+06	1.83045e+06	1.92435e+06	2.20285e+06	4.3639e+06	2.04479e+06	1.81035e+06	7.76877e+06	4.72887e+06	7.04896e+06	4.43951e+06	6.89594e+06	7.092e+06	7.92887e+06	1.01792e+07	9.99335e+06	7.65899e+06	3.31725e+06	2.64904e+06	2.55858e+06	2.85711e+06
9-cis-Retinoic acid	3.74	level1			301.215	305.6	POS	1.96777e+07	2.05056e+07	2.08571e+07	3.01304e+07	2.29461e+07	1.93047e+07	2.33307e+07	2.60087e+07	2.50842e+07	2.33988e+07	1.95891e+07	3.33803e+07	1.10262e+07	2.47737e+07	3.14487e+07	1.69207e+07	8.64453e+06	1.92322e+07	1.92322e+07	1.60167e+07	9.29537e+06	1.27906e+07	2.49871e+07	2.26532e+07	1.86838e+07	2.85751e+07	1.73884e+07	1.48927e+07
7alpha,25-Dihydroxycholesterol	3.74	level1			399.321	273.8	NEG	1.86578e+06	1.98426e+06	1.6006e+06	2.51045e+06	2.29304e+06	1.82338e+06	2.2743e+06	2.76524e+06	2.98631e+06	2.68579e+06	2.11777e+06	2.62439e+06	1.48508e+06	2.26894e+06	2.40139e+06	2.19189e+06	1.2392e+06	1.76375e+06	1.11874e+06	1.59102e+06	1.32927e+06	1.668e+06	2.10506e+06	2.05231e+06	2.87805e+06	1.79537e+06	1.83384e+06	2.08275e+06
Sph(t18:0)	3.74	level1			316.284	258	NEG	4.5867e+06	3.83035e+06	4.77319e+06	4.82974e+06	3.95606e+06	4.95613e+06	4.79044e+06	5.48735e+06	5.38706e+06	6.19893e+06	6.83799e+06	5.83127e+06	5.92461e+06	6.68875e+06	4.87066e+06	4.73321e+06	5.13382e+06	4.77374e+06	4.06511e+06	4.04761e+06	5.57524e+06	8.16974e+06	7.02109e+06	6.0717e+06	5.91371e+06	5.43649e+06	5.31067e+06	5.56894e+06
Anthranilic acid (Vitamin L1)	3.74	level1			136.04	165.7	NEG	4.45076e+06	6.93418e+06	5.40208e+06	4.579e+06	5.26077e+06	4.78163e+06	4.26697e+06	5.07408e+06	5.75672e+06	6.45383e+06	4.67586e+06	1.11508e+07	4.47115e+06	3.89388e+06	6.42188e+06	5.30979e+06	5.97727e+06	1.30209e+07	9.45795e+06	9.55079e+06	8.70913e+06	1.66221e+07	8.04372e+06	4.89948e+06	6.18302e+06	5.04647e+06	6.29087e+06	5.60627e+06
Desaminotyrosine	3.74	level1			165.055	160.5	NEG	3.0935e+08	2.94833e+08	2.56116e+08	2.87785e+08	2.58091e+08	3.39595e+08	2.40936e+08	2.73209e+08	2.37796e+08	3.05058e+08	2.29529e+08	2.66742e+08	2.01629e+08	1.90323e+08	2.2534e+08	2.0696e+08	2.14406e+08	2.62383e+08	2.73493e+08	2.56217e+08	3.06333e+08	2.35246e+08	2.27743e+08	1.90974e+08	2.54672e+08	2.49036e+08	2.5206e+08	2.51582e+08
2-(2-Butoxyethoxy)acetic acid	3.74	level1			175.097	160.4	NEG	7.6494e+07	7.85701e+07	7.7139e+07	6.57739e+07	7.63095e+07	7.97753e+07	8.2123e+07	8.36058e+07	9.29377e+07	9.46933e+07	8.84657e+07	8.70371e+07	6.94652e+07	6.73122e+07	7.47766e+07	7.14175e+07	7.27215e+07	7.05642e+07	8.56397e+07	7.00754e+07	7.99669e+07	8.31511e+07	8.01832e+07	7.91138e+07	7.90675e+07	7.67107e+07	7.65225e+07	7.74463e+07
2-Aminopimelate	3.74	level1			174.076	26.7	NEG	4.96267e+07	5.56137e+07	5.85794e+07	5.07879e+07	4.89826e+07	5.23884e+07	5.62477e+07	5.15446e+07	6.1537e+07	5.71525e+07	6.04993e+07	6.25029e+07	5.02342e+07	5.27819e+07	4.61564e+07	4.72639e+07	5.05735e+07	4.85575e+07	4.5478e+07	4.92797e+07	4.39469e+07	4.28349e+07	4.33706e+07	5.07816e+07	4.66363e+07	4.88872e+07	4.83551e+07	5.19697e+07
Mesaconic acid	3.74	level1			129.019	3.9	NEG	6.87801e+06	9.94242e+06	9.1805e+06	1.11412e+07	1.20939e+07	9.6529e+06	9.67304e+06	9.40839e+06	8.60427e+06	9.36237e+06	8.90973e+06	9.33634e+06	9.40176e+06	7.61998e+06	9.62037e+06	8.27518e+06	9.3482e+06	9.30807e+06	9.58413e+06	8.61732e+06	9.14277e+06	9.38911e+06	9.46427e+06	9.59673e+06	7.76748e+06	9.77796e+06	9.59889e+06	9.59109e+06
Stearamide	3.73	level1			284.293	320.9	POS	4.59842e+06	4.61466e+06	5.23578e+06	4.72369e+06	4.98889e+06	4.98096e+06	4.80303e+06	4.76373e+06	6.5225e+06	5.25285e+06	5.59564e+06	5.133e+06	5.13836e+06	6.17135e+06	4.31482e+06	4.96952e+06	4.60577e+06	4.43185e+06	4.73941e+06	4.45737e+06	4.3054e+06	4.74958e+06	4.93044e+06	4.97269e+06	4.71727e+06	4.50132e+06	4.92659e+06	4.66395e+06
Ciprofloxacin	3.73	level1			314.128	170.2	POS	2.7668e+07	2.80996e+07	3.1615e+07	2.33654e+07	2.52157e+07	3.327e+07	2.59586e+07	2.46662e+07	4.3349e+07	3.94188e+07	2.7528e+07	3.19017e+07	1.27366e+07	7.3762e+06	6.75624e+06	3.79572e+06	1.05884e+07	1.15774e+07	9.79781e+06	1.32629e+07	1.13573e+07	1.10556e+07	2.1581e+06	1.16325e+07	1.81896e+07	1.80819e+07	1.91373e+07	1.93618e+07
Zingerone	3.73	level1			193.086	168.3	NEG	2.45104e+06	3.3745e+06	3.92105e+06	2.48867e+06	2.82656e+06	4.10029e+06	3.62701e+06	3.84898e+06	4.87937e+06	4.43867e+06	3.79542e+06	3.75619e+06	2.57981e+06	3.52832e+06	2.58948e+06	3.17735e+06	2.30257e+06	2.58768e+06	3.46536e+06	3.1152e+06	3.1531e+06	1.9972e+06	1.9651e+06	624704	3.43086e+06	3.35413e+06	2.59776e+06	3.36698e+06
Ditolylguanidine	3.73	level1			240.148	149.4	POS	5.83879e+09	5.33771e+09	4.66289e+09	4.96894e+09	4.5452e+09	5.94954e+09	3.30998e+09	3.91549e+09	3.24529e+09	3.36049e+09	3.37926e+09	2.83587e+09	3.41926e+09	3.1728e+09	3.76903e+09	3.13904e+09	3.81476e+09	3.84992e+09	4.82307e+09	5.0344e+09	4.96116e+09	5.11484e+09	4.842e+09	4.165e+09	4.23171e+09	4.30848e+09	4.2533e+09	4.23759e+09
3,7-Dimethyluric acid	3.73	level1			195.05	37.4	NEG	1.2671e+08	1.13274e+08	1.21115e+08	9.62451e+07	1.24789e+08	1.47686e+08	8.17626e+07	4.94011e+07	1.25257e+08	5.94032e+07	1.12922e+08	9.45311e+07	8.58639e+07	9.08921e+07	6.38782e+07	1.53392e+08	1.2948e+08	1.36783e+08	1.19312e+08	1.51697e+08	1.3673e+08	6.40891e+07	5.68046e+07	1.08619e+08	5.74753e+07	6.62493e+07	6.07714e+07	1.29291e+08
Daphnetin	3.72	level1			177.018	156.4	NEG	4.16423e+06	7.35789e+06	6.25736e+06	6.44727e+06	9.58528e+06	5.2699e+06	1.18581e+07	1.38122e+07	9.7445e+06	1.29651e+07	2.08494e+07	1.12006e+07	1.53264e+07	1.41051e+07	1.97343e+07	2.08884e+07	1.81441e+07	1.46035e+07	8.99269e+06	8.74659e+06	5.8794e+06	1.13131e+07	9.85751e+06	1.42462e+07	1.27776e+07	1.216e+07	1.1401e+07	1.1831e+07
Glucosamine	3.72	level1			180.086	22.5	POS	1.52033e+06	1.57487e+06	1.82373e+06	1.96619e+06	1.31836e+06	1.52834e+06	1.1135e+06	1.08157e+06	1.06117e+06	1.14423e+06	1.11506e+06	1.14195e+06	909132	871238	1.46288e+06	1.16784e+06	1.16034e+06	1.25898e+06	1.08045e+06	1.53927e+06	1.07784e+06	1.51197e+06	1.31838e+06	1.18808e+06	1.32244e+06	1.16426e+06	1.14499e+06	1.10544e+06
Iditol	3.72	level1			181.071	30.4	NEG	1.78475e+06	1.1404e+06	4.67603e+06	2.1025e+06	2.24334e+06	3.34031e+06	2.48828e+06	1.4826e+06	1.83045e+06	1.92435e+06	2.20285e+06	4.3639e+06	2.04479e+06	1.81035e+06	7.76877e+06	4.72887e+06	7.04896e+06	4.43951e+06	6.89594e+06	7.092e+06	7.92887e+06	1.01792e+07	9.99335e+06	7.65899e+06	3.31725e+06	2.64904e+06	2.55858e+06	2.85711e+06
Nonadecanoic acid	3.72	level1			297.278	347.2	NEG	8.48841e+07	7.72759e+07	7.58158e+07	6.92244e+07	7.48319e+07	7.12589e+07	7.9905e+07	1.19102e+08	9.20987e+07	1.07407e+08	1.07116e+08	8.27576e+07	7.40606e+07	6.97844e+07	5.87576e+07	5.32507e+07	6.1482e+07	5.25304e+07	6.02131e+07	5.65103e+07	5.29313e+07	7.46551e+07	8.5119e+07	8.25988e+07	8.17538e+07	8.09513e+07	6.85933e+07	6.9778e+07
Ecabet (sodium)	3.72	level1			379.159	196.3	NEG	9.09955e+07	9.05126e+07	1.00727e+08	6.72319e+07	9.67577e+07	1.10699e+08	9.38128e+07	8.86345e+07	1.00721e+08	1.04048e+08	1.05064e+08	8.32528e+07	9.79568e+07	1.0399e+08	1.11062e+08	9.31257e+07	8.70627e+07	8.74574e+07	9.90649e+07	1.11631e+08	1.24567e+08	7.77032e+07	7.7637e+07	8.38675e+07	9.38944e+07	9.43332e+07	9.67652e+07	9.3318e+07
2-Ketobutyric acid	3.72	level1			101.024	45.6	NEG	1.18916e+08	1.20017e+08	1.2417e+08	1.1029e+08	1.42298e+08	1.18775e+08	1.12656e+08	1.11007e+08	1.13556e+08	1.12454e+08	1.10507e+08	1.1019e+08	1.08109e+08	1.03986e+08	1.18844e+08	1.0962e+08	1.14949e+08	1.15423e+08	1.15625e+08	1.14267e+08	1.91631e+07	1.12961e+08	1.43857e+07	1.11957e+08	1.04032e+08	1.16175e+08	1.16173e+08	1.15525e+08
Kojic acid	3.72	level1			143.033	15	POS	1.06276e+07	1.16503e+07	1.12482e+07	1.12764e+07	1.05401e+07	9.5519e+06	1.11168e+07	1.19408e+07	1.08172e+07	1.05678e+07	1.11436e+07	1.16514e+07	1.14119e+07	1.12081e+07	9.67142e+06	1.15995e+07	1.06808e+07	1.22914e+07	1.19461e+07	1.0328e+07	1.11209e+07	1.13461e+07	1.15983e+07	9.91923e+06	1.02489e+07	1.1437e+07	1.17631e+07	1.13697e+07
4-Hydroxyphenylacetic acid	3.71	level1			151.04	141.8	NEG	2.35591e+07	2.91002e+07	2.93881e+07	2.56265e+07	2.31186e+07	2.4761e+07	3.29019e+07	3.4695e+07	3.95635e+07	3.37116e+07	4.22709e+07	3.64986e+07	2.36906e+07	1.92538e+07	1.89876e+07	1.09633e+07	1.75393e+07	1.8927e+07	1.15974e+07	1.22713e+07	1.02619e+07	1.4408e+07	1.18832e+07	1.63845e+07	2.39127e+07	2.38379e+07	2.36513e+07	2.35627e+07
3-Amino-3-(4-hydroxyphenyl)propanoic acid	3.71	level1			182.081	35.2	POS	5.93266e+06	6.34155e+06	7.25965e+06	6.81199e+06	7.57264e+06	4.02965e+06	1.27949e+07	8.65807e+06	2.99329e+07	9.50615e+06	1.12181e+07	3.43596e+07	1.32968e+07	1.94437e+07	7.12384e+06	1.05804e+07	1.13829e+07	8.03193e+06	7.42213e+06	9.75147e+06	5.79961e+06	1.0531e+07	8.57272e+06	8.87264e+06	7.76982e+06	7.56356e+06	9.82846e+06	5.31994e+06
Epinephrine	3.71	level1			164.071	36.7	NEG	7.38679e+08	8.54028e+08	3.81783e+08	6.17231e+08	4.72927e+08	4.83964e+08	5.6333e+08	6.04357e+08	4.43918e+08	4.83534e+08	4.02073e+08	2.64956e+08	3.00183e+08	2.17137e+08	3.18719e+08	1.62786e+08	2.76861e+08	4.18558e+08	2.91875e+08	2.02119e+08	3.48064e+08	6.94931e+08	5.6972e+08	5.91911e+08	3.28011e+08	3.55464e+08	5.7413e+08	4.05157e+08
Cer(d18:1/4:0)	3.71	level1			368.315	318.7	NEG	9.31439e+06	9.79687e+06	9.9804e+06	9.88484e+06	7.80523e+06	9.23507e+06	1.14837e+07	1.55847e+07	1.37794e+07	1.35178e+07	1.11376e+07	1.04725e+07	1.03343e+07	1.06096e+07	1.07712e+07	7.17738e+06	9.07314e+06	1.34227e+07	5.79987e+06	2.06058e+07	6.02377e+06	8.85267e+06	7.49228e+06	8.30666e+06	9.67637e+06	9.75048e+06	1.03139e+07	1.0206e+07
NAE(18:2)	3.71	level1			324.288	295.6	POS	1.19425e+07	1.29081e+07	1.50779e+07	1.55214e+07	2.4097e+07	1.46136e+07	1.83619e+07	1.71318e+07	2.00597e+07	1.9506e+07	2.21994e+07	1.63801e+07	1.19206e+07	1.33548e+07	1.03535e+07	1.34446e+07	1.34759e+07	9.07669e+06	1.08851e+07	9.90101e+06	1.15016e+07	1.48728e+07	1.178e+07	1.54793e+07	1.3636e+07	1.6184e+07	1.58128e+07	1.35234e+07
Oxatomide	3.71	level1			425.234	244.8	NEG	5.47943e+06	4.67838e+06	3.38904e+06	4.27526e+06	6.2616e+06	5.83609e+06	2.92553e+06	2.79047e+06	4.09927e+06	3.95782e+06	4.19104e+06	3.50255e+06	2.23191e+06	1.65281e+06	2.23614e+06	3.86607e+06	3.30513e+06	2.10123e+06	6.49696e+06	9.58966e+06	8.02281e+06	4.09705e+06	4.82787e+06	2.0213e+06	3.47255e+06	2.95628e+06	3.15889e+06	3.3695e+06
Sebacic acid	3.71	level1			183.102	224.3	NEG	5.57198e+06	6.62773e+06	4.8706e+06	4.99359e+06	6.08702e+06	6.49656e+06	4.87285e+06	4.70081e+06	4.81383e+06	1.11466e+07	4.28593e+06	4.31922e+06	5.31305e+06	4.7119e+06	5.62278e+06	5.43173e+06	5.32874e+06	4.94322e+06	1.19989e+07	1.04252e+07	1.06782e+07	1.12753e+07	1.09379e+07	1.77183e+07	6.45526e+06	5.82272e+06	5.97788e+06	1.57074e+07
Naftopidil	3.71	level1			393.223	213.1	POS	2.17757e+07	2.50787e+07	2.29356e+07	2.58016e+07	3.14227e+07	2.17086e+07	3.06534e+07	3.29326e+07	2.9607e+07	2.42483e+07	2.51224e+07	2.72334e+07	2.35074e+07	2.6537e+07	2.79925e+07	2.24803e+07	1.89618e+07	2.35213e+07	1.24685e+07	1.42289e+07	1.12705e+07	1.4863e+07	1.63662e+07	1.81586e+07	2.16998e+07	2.11924e+07	2.17591e+07	2.31105e+07
Dipyridamole	3.71	level1			505.326	142.5	POS	3.164e+07	3.26594e+07	3.24281e+07	2.81005e+07	2.90559e+07	3.36029e+07	3.01594e+07	2.18862e+07	3.17319e+07	3.85939e+07	2.81693e+07	2.40141e+07	2.36361e+07	1.73725e+07	1.89761e+07	1.50806e+07	1.63942e+07	1.71233e+07	2.29667e+07	2.33888e+07	2.50927e+07	2.00967e+07	2.27637e+07	2.18323e+07	2.38023e+07	2.40874e+07	2.53948e+07	2.4889e+07
1-Methylxanthine	3.71	level1			165.04	71.3	NEG	3.70317e+07	7.37409e+07	3.4849e+07	3.23391e+07	3.6417e+07	2.76237e+07	2.69675e+07	2.00607e+07	2.86365e+07	3.13315e+07	2.92618e+07	2.68352e+07	2.77343e+07	2.51065e+07	3.16787e+07	3.50921e+07	3.34419e+07	3.2737e+07	2.96569e+07	4.42704e+06	5.96621e+07	2.50709e+07	2.10615e+07	2.5595e+07	2.97312e+07	2.09329e+07	6.83118e+07	3.13577e+07
N-Tigloylglycine	3.71	level1			156.066	63.4	NEG	6.31687e+06	6.28915e+06	7.7071e+06	5.77309e+06	5.99771e+06	6.00838e+06	6.24854e+06	6.09397e+06	6.14319e+06	6.83645e+06	6.59482e+06	5.21003e+06	1.46739e+07	7.53558e+06	6.29747e+06	5.77692e+06	6.02726e+06	7.08092e+06	7.02104e+06	5.94305e+06	5.97567e+06	8.17243e+06	6.3757e+06	7.12327e+06	6.20146e+06	6.32481e+06	5.33795e+06	6.57774e+06
Isoquinoline	3.71	level1			130.065	42.3	POS	6.06986e+08	5.20226e+08	4.32165e+08	4.49116e+08	4.81058e+08	6.00629e+08	3.21699e+08	3.35082e+08	4.66155e+08	3.98834e+08	4.331e+08	3.61796e+08	2.90824e+08	4.07458e+08	4.5337e+08	3.93593e+08	3.17305e+08	3.1965e+08	3.92792e+08	4.00474e+08	4.37367e+08	3.07488e+08	3.45001e+08	4.16469e+08	4.06556e+08	3.46207e+08	4.43146e+08	4.23015e+08
Thymidine	3.71	level1			241.082	36.4	NEG	6.84026e+07	7.42099e+07	8.65548e+07	6.63236e+07	6.20258e+07	7.03183e+07	8.91861e+07	7.73026e+07	1.11942e+08	8.67983e+07	8.79339e+07	9.36794e+07	8.16668e+07	9.0189e+07	7.29379e+07	6.39523e+07	1.07042e+08	8.00178e+07	4.68899e+07	6.26813e+07	4.70848e+07	6.53685e+07	5.91766e+07	6.34961e+07	6.55847e+07	7.08002e+07	7.20414e+07	7.29979e+07
Inosine	3.71	level1			267.071	34.7	NEG	3.95729e+07	4.07753e+07	3.5926e+07	3.17975e+07	2.96942e+07	3.38277e+07	3.62124e+07	2.8799e+07	3.16771e+07	3.18881e+07	2.67968e+07	3.22086e+07	3.57534e+07	2.69184e+07	3.78088e+07	3.88056e+07	3.11532e+07	3.26347e+07	3.16688e+07	3.96283e+07	4.2875e+07	3.8143e+07	3.9706e+07	4.36393e+07	4.32381e+07	4.75158e+07	3.70576e+07	3.36157e+07
7-Ketodeoxycholic acid	3.7	level1			405.263	269.2	NEG	2.54977e+06	3.00138e+06	1.96354e+06	2.05159e+06	2.65935e+06	2.24049e+06	2.11991e+06	2.95951e+06	2.59371e+06	2.17317e+06	2.1851e+06	1.20746e+06	1.07209e+06	664985	2.05663e+06	1.38878e+06	1.8793e+06	2.77625e+06	1.18712e+06	655423	967052	2.17645e+06	1.70031e+06	1.55601e+06	1.99191e+06	2.15064e+06	1.26627e+06	2.04184e+06
Linoleic acid	3.7	level1			279.232	353.4	NEG	1.44938e+07	1.47148e+07	7.41808e+06	1.40061e+07	1.51406e+07	2.4495e+07	2.5318e+07	1.45039e+07	1.39535e+07	5.5781e+06	7.68733e+06	1.46585e+07	1.66216e+07	1.52111e+07	1.68722e+07	1.61761e+07	2.84724e+07	1.69099e+07	1.48484e+07	2.73268e+06	1.36393e+07	1.64089e+07	1.37348e+07	2.92066e+07	2.3796e+07	1.60858e+07	8.47542e+06	1.46673e+07
Tetracosanoic acid	3.7	level1			367.357	347.2	NEG	1.77699e+07	1.21812e+07	1.6715e+07	1.74641e+07	1.09558e+07	1.30221e+07	1.33376e+07	1.49753e+07	1.12462e+07	1.62645e+07	116156	1.45254e+07	1.81185e+07	1.45469e+07	1.36569e+07	85447.6	1.60618e+07	1.33574e+07	1.51191e+07	1.52139e+07	1.58977e+07	1.5006e+07	2.068e+07	1.5775e+07	1.456e+07	1.29048e+07	1.09881e+07	9.43627e+06
Pseudolaric Acid A	3.7	level1			387.179	225.7	NEG	6.54788e+06	1.93187e+07	1.82137e+07	1.36718e+07	2.68156e+07	1.02209e+07	4.4809e+07	3.45302e+07	2.11342e+07	4.31253e+07	8.31269e+07	3.6664e+07	2.93447e+07	2.38722e+07	4.47056e+07	3.42555e+07	3.84851e+07	1.85918e+07	1.07567e+07	8.93841e+06	1.07445e+07	1.40937e+07	1.70857e+07	1.77577e+07	2.53062e+07	2.55302e+07	2.51847e+07	2.58958e+07
Nevirapine	3.7	level1			267.119	198.3	POS	5.12479e+07	5.14271e+07	5.34389e+07	4.74556e+07	4.7885e+07	5.84438e+07	5.23211e+07	4.76736e+07	6.14097e+07	5.74642e+07	6.1354e+07	5.47089e+07	6.39523e+07	7.4029e+07	6.6695e+07	6.12645e+07	5.82069e+07	5.81638e+07	5.80995e+07	5.62529e+07	6.26014e+07	5.26146e+07	4.85393e+07	4.6088e+07	5.60098e+07	5.80441e+07	5.56314e+07	5.6562e+07
2-Hydroxy-6-methoxybenzoic acid	3.7	level1			167.034	153.4	NEG	1.12863e+08	1.19153e+08	9.21546e+07	1.02157e+08	1.10998e+08	1.3132e+08	9.3117e+07	9.19984e+07	8.15373e+07	8.78855e+07	8.73549e+07	6.88922e+07	7.52698e+07	7.25782e+07	9.85863e+07	9.36316e+07	9.845e+07	8.54573e+07	7.73978e+07	7.0827e+07	9.48494e+07	7.7706e+07	6.9362e+07	6.059e+07	9.10923e+07	8.5321e+07	8.91716e+07	8.9555e+07
2,3-Dihydroxy-4-methoxyacetophenone	3.7	level1			181.05	152.4	NEG	3.32747e+06	4.94436e+06	3.70823e+06	3.58007e+06	4.09336e+06	2.589e+06	4.38079e+06	3.51901e+06	6.65998e+06	3.33639e+06	7.80769e+06	5.01285e+06	3.20654e+06	4.04704e+06	3.26116e+06	3.88401e+06	3.44677e+06	2.15431e+06	3.70448e+06	3.91332e+06	6.02928e+06	983982	967021	2.37439e+06	4.12492e+06	2.91031e+06	3.30067e+06	3.49754e+06
3-Methylglutaric acid	3.7	level1			145.05	63	NEG	2.74212e+07	2.53851e+07	2.86373e+07	2.77965e+07	2.28728e+07	2.32901e+07	2.67265e+07	3.18352e+07	2.70202e+07	2.98333e+07	2.65851e+07	2.69263e+07	2.42973e+07	3.22665e+07	1.3354e+07	2.25087e+07	2.32657e+07	3.01013e+07	2.86375e+07	1.60012e+07	1.5419e+07	3.05056e+07	1.60639e+07	2.64908e+07	2.91519e+07	2.80032e+07	2.91767e+07	2.75333e+07
Tryptophan	3.7	level1			205.096	56.3	POS	7.20493e+08	1.12193e+09	7.83611e+08	7.81075e+08	8.92225e+08	9.02611e+08	9.31431e+08	8.03047e+08	7.0306e+08	9.913e+08	7.04735e+08	6.17734e+08	3.51607e+08	5.14448e+08	6.08248e+08	4.68423e+08	6.49707e+08	7.83389e+08	5.41557e+08	2.76093e+08	4.34213e+08	1.06558e+09	8.76811e+08	4.79037e+08	8.78242e+08	8.1628e+08	8.09871e+08	7.91038e+08
Valine	3.7	level1			116.071	38.9	NEG	8.81932e+06	9.05376e+06	8.22073e+06	9.70292e+06	1.59466e+06	1.07597e+07	7.1174e+06	9.22226e+06	5.17315e+06	8.89341e+06	1.35688e+06	8.06017e+06	1.75588e+06	2.84511e+06	0	0	0	5.59414e+06	0	0	0	8.86478e+06	4.03159e+06	2.90242e+06	1.75495e+06	4.16285e+06	2.56254e+06	2.34172e+06
3,5-Dihydroxyacetophenone	3.69	level1			151.04	190	NEG	1.53423e+07	1.58561e+07	1.61279e+07	1.63291e+07	1.52939e+07	1.48712e+07	1.51069e+07	1.68096e+07	1.80606e+07	1.88584e+07	1.89142e+07	1.68388e+07	1.80767e+07	1.25766e+07	1.64205e+07	1.48015e+07	1.32804e+07	1.06446e+07	9.67434e+06	7.78774e+06	8.63325e+06	1.13599e+07	9.75392e+06	1.13368e+07	1.34849e+07	1.40043e+07	1.4505e+07	1.36236e+07
Ethyl Vanillate	3.69	level1			195.065	174	NEG	1.31355e+07	7.91264e+06	7.28755e+06	8.18724e+06	8.65786e+06	6.90731e+06	9.22472e+06	9.48393e+06	8.32656e+06	8.83912e+06	7.17257e+06	1.70145e+07	5.69219e+06	6.49475e+06	5.83062e+06	6.45602e+06	1.1322e+07	6.00512e+06	4.57705e+06	6.76353e+06	5.07516e+06	5.69829e+06	1.20237e+07	1.03588e+07	1.10904e+07	7.14078e+06	7.98769e+06	6.79601e+06
Normetanephrine	3.69	level1			166.085	36.8	POS	6.38295e+08	8.13226e+08	5.21016e+08	1.00289e+09	4.53047e+08	5.10269e+08	7.63794e+08	1.01273e+09	4.51597e+08	7.35663e+08	5.91686e+08	4.83264e+08	4.32488e+08	3.83703e+08	5.62994e+08	2.64475e+08	4.67942e+08	5.96373e+08	4.16499e+08	2.98488e+08	2.88687e+08	9.47383e+08	9.13862e+08	7.90534e+08	6.86481e+08	6.65624e+08	6.04002e+08	6.34995e+08
Ferulate	3.69	level1			193.049	179.5	NEG	1.91941e+07	2.12985e+07	2.21017e+07	1.99455e+07	2.4798e+07	2.20404e+07	2.70104e+07	2.7087e+07	2.29453e+07	3.32164e+07	4.21888e+07	2.40596e+07	2.03114e+07	2.42882e+07	2.31519e+07	2.74643e+07	2.67581e+07	1.79881e+07	1.73911e+07	1.57118e+07	1.52752e+07	1.89237e+07	1.7583e+07	1.95551e+07	2.32998e+07	2.22249e+07	2.2689e+07	2.25583e+07
3,4-Dihydroxybenzoic acid (Protocatechuic acid)	3.69	level1			153.018	59.7	NEG	1.56501e+07	3.67508e+07	4.9755e+07	3.2044e+07	4.32489e+07	5.11698e+07	5.3618e+07	5.43816e+07	5.21335e+07	8.77176e+07	1.36041e+08	5.34254e+07	5.83027e+07	4.87846e+07	9.31241e+07	1.56263e+08	6.08822e+07	6.69664e+07	3.29295e+07	4.98346e+07	5.02092e+07	5.01105e+07	5.19175e+07	7.96169e+07	6.46761e+07	6.26017e+07	6.46553e+07	5.21449e+07
2-Methylglutaric acid	3.69	level1			145.05	63	NEG	2.74212e+07	2.53851e+07	2.86373e+07	2.77965e+07	2.28728e+07	2.32901e+07	2.67265e+07	3.18352e+07	2.70202e+07	2.98333e+07	2.65851e+07	2.69263e+07	2.42973e+07	3.22665e+07	1.3354e+07	2.25087e+07	2.32657e+07	3.01013e+07	2.86375e+07	1.60012e+07	1.5419e+07	3.05056e+07	1.60639e+07	2.64908e+07	2.91519e+07	2.80032e+07	2.91767e+07	2.75333e+07
Erucamide	3.69	level1			338.339	330	POS	1.82715e+07	1.82619e+07	1.6865e+07	1.77443e+07	1.79103e+07	1.76222e+07	2.04812e+07	1.73992e+07	1.97954e+07	1.75444e+07	1.88508e+07	1.87513e+07	1.62618e+07	1.85981e+07	1.61195e+07	1.6934e+07	1.78753e+07	1.55032e+07	1.77257e+07	1.79857e+07	1.52777e+07	1.81833e+07	1.68772e+07	1.72507e+07	1.67648e+07	1.83012e+07	1.65622e+07	1.5639e+07
N-acetyldopamine	3.69	level1			196.096	143.8	POS	1.02636e+07	1.08458e+07	1.48777e+07	1.09532e+07	1.36564e+07	1.90973e+07	1.28514e+07	9.67139e+06	1.21567e+07	9.56074e+06	7.89767e+06	1.04333e+07	1.28592e+07	1.53358e+07	3.34955e+07	1.24326e+07	1.92257e+07	2.276e+07	1.72878e+07	1.50013e+07	1.4556e+07	1.09771e+07	1.71753e+07	2.61499e+07	1.52027e+07	1.48355e+07	1.52095e+07	1.46503e+07
Isonicotinic acid	3.69	level1			124.039	49	POS	4.45123e+07	4.92556e+07	4.83886e+07	6.86636e+07	4.56317e+07	9.16516e+07	1.18001e+08	7.86589e+07	4.77057e+07	4.24286e+07	4.84694e+07	4.77996e+07	4.52151e+07	1.23033e+08	2.82933e+07	5.15211e+07	4.87784e+07	5.1876e+07	9.50514e+07	5.37007e+07	5.78183e+07	3.04705e+07	5.01552e+07	4.66049e+07	4.91626e+07	3.29514e+07	2.61676e+07	2.26621e+07
Uracil	3.69	level1			113.034	41.2	POS	2.24775e+06	1.84399e+06	2.11589e+06	2.13959e+06	1.84557e+06	1.48704e+06	2.64945e+06	3.3637e+06	3.64378e+06	3.52271e+06	3.62747e+06	2.72325e+06	3.48832e+06	3.73876e+06	3.53299e+06	2.48816e+06	3.48699e+06	1.68502e+06	2.72052e+06	2.56159e+06	2.38219e+06	2.20422e+06	1.93052e+06	2.23724e+06	2.69653e+06	2.26114e+06	2.30955e+06	3.40599e+06
7-Methylxanthine	3.69	level1			165.04	22.8	NEG	1.77858e+08	1.76124e+08	1.78059e+08	1.42151e+08	1.79678e+08	1.91449e+08	1.26542e+08	1.61646e+08	1.44788e+08	1.4901e+08	1.59015e+08	1.41626e+08	1.54321e+08	1.11224e+08	1.71652e+08	1.79926e+08	1.46752e+08	1.53969e+08	1.4838e+08	1.6075e+08	1.65281e+08	1.40601e+08	1.30587e+08	1.34157e+08	1.46444e+08	1.44912e+08	1.47769e+08	1.46989e+08
3-hydroxybenzaldehyde	3.68	level1			121.029	192.2	NEG	1.62918e+08	1.45725e+08	1.41767e+08	1.39128e+08	1.15274e+08	1.75344e+08	1.15541e+08	1.56085e+08	1.73443e+08	1.4579e+08	1.16096e+08	1.00328e+08	9.00817e+07	9.35673e+07	1.04615e+08	8.62637e+07	1.09065e+08	1.71565e+08	1.77653e+08	2.04041e+08	2.41695e+08	1.208e+08	1.29539e+08	1.01962e+08	1.40391e+08	1.33074e+08	1.35427e+08	1.33239e+08
4-Hydroxybenzaldehyde	3.68	level1			121.029	192.2	NEG	1.62918e+08	1.45725e+08	1.41767e+08	1.39128e+08	1.15274e+08	1.75344e+08	1.15541e+08	1.56085e+08	1.73443e+08	1.4579e+08	1.16096e+08	1.00328e+08	9.00817e+07	9.35673e+07	1.04615e+08	8.62637e+07	1.09065e+08	1.71565e+08	1.77653e+08	2.04041e+08	2.41695e+08	1.208e+08	1.29539e+08	1.01962e+08	1.40391e+08	1.33074e+08	1.35427e+08	1.33239e+08
5,7-Dihydroxycoumarin	3.68	level1			177.018	156.4	NEG	4.16423e+06	7.35789e+06	6.25736e+06	6.44727e+06	9.58528e+06	5.2699e+06	1.18581e+07	1.38122e+07	9.7445e+06	1.29651e+07	2.08494e+07	1.12006e+07	1.53264e+07	1.41051e+07	1.97343e+07	2.08884e+07	1.81441e+07	1.46035e+07	8.99269e+06	8.74659e+06	5.8794e+06	1.13131e+07	9.85751e+06	1.42462e+07	1.27776e+07	1.216e+07	1.1401e+07	1.1831e+07
2-Hydroxyhexanoic acid	3.68	level1			131.071	143.9	NEG	2.17786e+08	1.4229e+08	1.98374e+08	1.9859e+08	2.07251e+08	2.14039e+08	1.6468e+08	1.75916e+08	1.82882e+08	1.76767e+08	1.81656e+08	1.66272e+08	1.83223e+08	1.98058e+08	1.76068e+08	1.89034e+08	1.97481e+08	2.0245e+08	2.45197e+08	2.40511e+08	2.71459e+08	1.90549e+08	1.99562e+08	1.57599e+08	1.85709e+08	1.40098e+08	1.92988e+08	1.91633e+08
8-Hydroxycarbostyril	3.68	level1			160.04	192	NEG	6.8214e+07	6.92179e+07	6.7072e+07	5.76907e+07	6.80497e+07	7.92778e+07	7.85939e+07	9.24335e+07	7.41542e+07	9.46614e+07	7.24619e+07	9.04563e+07	6.10939e+07	5.23779e+07	6.94629e+07	5.65906e+07	6.22112e+07	6.33734e+07	8.63117e+07	8.85279e+07	7.3288e+07	6.26152e+07	7.11e+07	5.79614e+07	7.07237e+07	6.78117e+07	6.92568e+07	6.87351e+07
2-Phenyllactic acid	3.68	level1			165.055	160.5	NEG	3.0935e+08	2.94833e+08	2.56116e+08	2.87785e+08	2.58091e+08	3.39595e+08	2.40936e+08	2.73209e+08	2.37796e+08	3.05058e+08	2.29529e+08	2.66742e+08	2.01629e+08	1.90323e+08	2.2534e+08	2.0696e+08	2.14406e+08	2.62383e+08	2.73493e+08	2.56217e+08	3.06333e+08	2.35246e+08	2.27743e+08	1.90974e+08	2.54672e+08	2.49036e+08	2.5206e+08	2.51582e+08
Pristanic acid	3.68	level1			297.278	347.2	NEG	8.48841e+07	7.72759e+07	7.58158e+07	6.92244e+07	7.48319e+07	7.12589e+07	7.9905e+07	1.19102e+08	9.20987e+07	1.07407e+08	1.07116e+08	8.27576e+07	7.40606e+07	6.97844e+07	5.87576e+07	5.32507e+07	6.1482e+07	5.25304e+07	6.02131e+07	5.65103e+07	5.29313e+07	7.46551e+07	8.5119e+07	8.25988e+07	8.17538e+07	8.09513e+07	6.85933e+07	6.9778e+07
4-(Methylamino)butanoic acid	3.68	level1			116.071	38.9	NEG	8.81932e+06	9.05376e+06	8.22073e+06	9.70292e+06	1.59466e+06	1.07597e+07	7.1174e+06	9.22226e+06	5.17315e+06	8.89341e+06	1.35688e+06	8.06017e+06	1.75588e+06	2.84511e+06	0	0	0	5.59414e+06	0	0	0	8.86478e+06	4.03159e+06	2.90242e+06	1.75495e+06	4.16285e+06	2.56254e+06	2.34172e+06
12-Hydroxystearic acid	3.68	level1			299.258	348.6	NEG	2.4682e+07	4.04909e+06	4.88444e+06	3.92559e+06	1.59374e+07	5.37777e+06	4.35075e+06	4.10172e+06	2.41912e+07	4.68817e+06	4.29163e+06	5.67992e+06	3.96105e+06	3.78717e+06	4.36377e+06	4.42423e+06	3.81583e+06	1.81177e+07	6.03389e+06	6.27819e+06	7.05691e+06	7.24481e+06	6.57081e+06	5.72434e+06	5.35485e+06	5.19121e+06	5.49405e+06	5.08253e+06
beta-Boswellic acid	3.68	level1			455.351	306.1	NEG	1.21914e+07	1.02205e+07	2.91441e+07	2.07559e+07	2.87097e+07	1.32493e+07	2.05309e+07	1.52809e+07	2.00105e+07	1.4273e+07	3.13893e+07	2.20423e+07	8.90314e+06	3.03245e+07	6.23574e+06	1.33095e+07	2.02711e+07	7.66726e+06	1.05925e+07	1.44588e+07	6.37157e+06	1.0749e+07	6.33391e+06	1.33636e+07	1.28788e+07	1.58327e+07	1.61682e+07	1.69014e+07
C75 trans	3.68	level1			253.143	225	NEG	8.31384e+06	8.50711e+06	2.15829e+07	9.11873e+06	1.34883e+07	1.24751e+07	1.18449e+07	1.37035e+07	1.23256e+07	1.37017e+07	1.18404e+07	1.35362e+07	1.44502e+07	1.76e+07	1.87949e+07	1.5563e+07	1.44477e+07	1.68956e+07	1.24569e+07	1.42106e+07	1.28897e+07	1.42558e+07	1.33728e+07	1.35618e+07	1.24291e+07	1.27868e+07	1.60592e+07	1.26491e+07
Atrazine	3.68	level1			216.101	191.3	POS	1.37919e+07	1.48269e+07	1.38672e+07	1.70411e+07	8.01394e+06	1.36446e+07	2.89459e+07	3.35367e+07	3.24503e+07	3.30948e+07	2.74037e+07	2.51575e+07	1.5138e+07	1.49023e+07	8.99637e+06	5.11893e+06	9.0357e+06	1.6906e+07	8.02934e+06	5.40851e+06	4.76361e+06	1.28901e+07	1.304e+07	1.29059e+07	1.5168e+07	1.50623e+07	1.57705e+07	1.52923e+07
Itaconic acid	3.68	level1			129.019	82.7	NEG	1.56725e+07	3.85902e+07	9.21743e+06	1.67362e+07	1.91748e+07	1.8634e+07	1.6806e+07	1.68195e+07	1.56394e+07	1.18132e+07	1.54508e+07	1.54867e+07	1.6028e+07	1.4988e+07	1.25991e+07	1.53539e+07	1.68532e+07	1.73299e+07	1.79547e+07	1.63511e+07	1.78809e+07	1.7434e+07	1.7095e+07	1.71485e+07	1.46235e+07	1.6989e+07	1.74074e+07	9.80805e+06
L-Valyl-L-phenylalanine	3.68	level1			265.154	70.3	POS	7.99437e+06	1.55142e+07	1.07444e+07	9.56606e+06	4.83916e+06	7.50215e+06	1.45079e+06	4.53955e+06	4.27385e+06	2.79309e+06	3.25639e+06	1.96055e+06	0	0	0	0	0	0	0	0	0	0	957805	4.99802e+06	1.40653e+06	812835	367263	0
4-Chlorophenylalanine	3.68	level1			200.047	58.7	POS	5.94313e+07	1.06748e+08	1.75097e+08	1.73737e+08	1.06121e+08	9.49264e+07	1.08415e+08	1.83584e+08	1.08797e+08	1.77676e+08	1.80694e+08	1.91385e+08	1.20473e+08	1.95277e+08	1.15988e+08	1.19721e+08	1.16426e+08	1.13005e+08	1.86632e+08	1.93341e+08	1.17978e+08	1.1862e+08	1.24052e+08	1.12055e+08	1.0565e+08	1.90791e+08	7.06638e+07	1.85821e+08
N2,N2-Dimethylguanosine	3.68	level1			312.129	41.9	POS	5.70801e+06	8.99998e+06	1.11465e+07	1.06528e+07	1.05188e+07	1.00307e+07	7.26394e+06	7.69989e+06	4.94075e+06	7.45701e+06	9.8613e+06	9.56579e+06	6.30699e+06	1.1669e+07	9.85961e+06	8.36644e+06	9.90922e+06	6.35993e+06	5.82434e+06	7.16743e+06	4.96533e+06	1.04318e+07	5.17985e+06	1.1454e+07	5.34794e+06	6.39327e+06	8.20975e+06	5.29798e+06
gamma-Glutamylmethionine	3.68	level1			277.081	28.6	NEG	8.95703e+07	7.71507e+07	7.97019e+07	1.31849e+08	9.39813e+07	8.60036e+07	9.47814e+07	7.64842e+07	1.07808e+08	7.95013e+07	8.17138e+07	8.33232e+07	1.38318e+08	1.77566e+08	1.56252e+08	1.74028e+08	1.49587e+08	1.69022e+08	2.41014e+08	1.82611e+08	2.33694e+08	1.55144e+08	1.81238e+08	1.7021e+08	1.23641e+08	1.22649e+08	1.2499e+08	1.28999e+08
4-Methylsalicylic acid	3.67	level1			151.04	190	NEG	1.53423e+07	1.58561e+07	1.61279e+07	1.63291e+07	1.52939e+07	1.48712e+07	1.51069e+07	1.68096e+07	1.80606e+07	1.88584e+07	1.89142e+07	1.68388e+07	1.80767e+07	1.25766e+07	1.64205e+07	1.48015e+07	1.32804e+07	1.06446e+07	9.67434e+06	7.78774e+06	8.63325e+06	1.13599e+07	9.75392e+06	1.13368e+07	1.34849e+07	1.40043e+07	1.4505e+07	1.36236e+07
gamma-CEHC (gamma-Carboxyethyl hydrochroman)	3.67	level1			263.128	201.2	NEG	2.59908e+07	2.94048e+07	3.67938e+07	2.88318e+07	3.83721e+07	3.16366e+07	3.87036e+07	2.94839e+07	3.77606e+07	4.10918e+07	3.49109e+07	4.3503e+07	3.13477e+07	3.07661e+07	3.84516e+07	3.13767e+07	3.14501e+07	2.96314e+07	7.51206e+07	6.69193e+07	5.28986e+07	3.65069e+07	3.0644e+07	3.8915e+07	3.25911e+07	3.29367e+07	3.36783e+07	3.19592e+07
5-Hydroxymethylfurfural	3.67	level1			127.038	14.9	POS	1.7074e+07	2.02888e+07	2.18618e+07	2.20383e+07	3.68177e+07	1.96236e+07	3.65287e+07	2.06004e+07	2.26536e+07	2.01848e+07	2.15513e+07	2.33869e+07	2.15752e+07	1.7614e+07	1.91564e+07	3.28736e+07	3.72745e+07	2.15696e+07	1.94867e+07	2.07472e+07	2.15442e+07	3.62168e+07	3.48848e+07	3.77335e+07	1.51057e+07	2.19109e+07	1.94643e+07	2.27026e+07
Methyl isovanillate	3.67	level1			181.05	152.4	NEG	3.32747e+06	4.94436e+06	3.70823e+06	3.58007e+06	4.09336e+06	2.589e+06	4.38079e+06	3.51901e+06	6.65998e+06	3.33639e+06	7.80769e+06	5.01285e+06	3.20654e+06	4.04704e+06	3.26116e+06	3.88401e+06	3.44677e+06	2.15431e+06	3.70448e+06	3.91332e+06	6.02928e+06	983982	967021	2.37439e+06	4.12492e+06	2.91031e+06	3.30067e+06	3.49754e+06
5-Aminopentanoic acid	3.67	level1			116.071	38.9	NEG	8.81932e+06	9.05376e+06	8.22073e+06	9.70292e+06	1.59466e+06	1.07597e+07	7.1174e+06	9.22226e+06	5.17315e+06	8.89341e+06	1.35688e+06	8.06017e+06	1.75588e+06	2.84511e+06	0	0	0	5.59414e+06	0	0	0	8.86478e+06	4.03159e+06	2.90242e+06	1.75495e+06	4.16285e+06	2.56254e+06	2.34172e+06
Citraconic acid	3.67	level1			129.019	82.7	NEG	1.56725e+07	3.85902e+07	9.21743e+06	1.67362e+07	1.91748e+07	1.8634e+07	1.6806e+07	1.68195e+07	1.56394e+07	1.18132e+07	1.54508e+07	1.54867e+07	1.6028e+07	1.4988e+07	1.25991e+07	1.53539e+07	1.68532e+07	1.73299e+07	1.79547e+07	1.63511e+07	1.78809e+07	1.7434e+07	1.7095e+07	1.71485e+07	1.46235e+07	1.6989e+07	1.74074e+07	9.80805e+06
Zearalanone	3.67	level1			319.157	250.8	NEG	5.36958e+06	4.67502e+06	4.82494e+06	5.65698e+06	4.61391e+06	4.63229e+06	3.89198e+06	4.9977e+06	4.77213e+06	3.85797e+06	3.44852e+06	3.97171e+06	4.84553e+06	5.27153e+06	5.10114e+06	5.34005e+06	4.96212e+06	3.99142e+06	4.43631e+06	4.41546e+06	3.0962e+06	4.87544e+06	5.47231e+06	7.24954e+06	5.27548e+06	4.39327e+06	4.00724e+06	5.30141e+06
Naratriptan (hydrochloride)	3.67	level1			336.173	207.2	POS	2.98075e+06	1.78908e+06	1.84952e+06	2.01553e+06	994773	2.22418e+06	3.00496e+06	6.99522e+06	2.541e+06	5.53117e+06	2.76677e+06	2.34227e+06	1.98549e+06	3.30298e+06	3.89453e+06	1.97455e+06	2.26885e+06	8.31248e+06	1.28199e+06	1.4967e+06	562901	1.47121e+07	7.49745e+06	6.31253e+06	3.23511e+06	3.03369e+06	3.41507e+06	3.29007e+06
Riboflavin	3.67	level1			377.144	158.5	POS	4.66062e+07	4.89856e+07	5.00436e+07	3.91442e+07	4.52508e+07	4.14898e+07	5.06323e+07	5.23819e+07	6.24561e+07	6.32791e+07	6.13396e+07	5.60169e+07	4.60375e+07	4.63682e+07	4.37239e+07	4.20911e+07	4.26994e+07	4.77367e+07	3.90573e+07	4.17135e+07	3.98479e+07	3.90532e+07	3.8221e+07	4.31418e+07	4.59148e+07	4.51499e+07	4.53445e+07	4.363e+07
Nonaethylene glycol	3.67	level1			415.252	153.6	POS	175431	1.11466e+06	1.53931e+06	868991	564364	1.10361e+06	147603	369217	1.4547e+06	1.05263e+06	1.15939e+06	744178	3.35898e+06	3.22561e+06	3.96728e+06	3.32622e+06	3.14874e+06	2.78484e+06	4.00106e+06	1.97311e+06	1.52942e+06	3.28837e+06	2.37475e+06	3.45273e+06	1.54126e+06	1.86295e+06	2.03386e+06	1.02703e+06
3-Indoleacrylic acid	3.67	level1			188.07	151	POS	1.96852e+07	1.54037e+07	1.40398e+07	1.63551e+07	1.38529e+07	1.95411e+07	2.14501e+07	1.32698e+07	1.77656e+07	1.7382e+07	1.83928e+07	1.69289e+07	1.69815e+07	1.79124e+07	1.62875e+07	1.45266e+07	1.87527e+07	2.1675e+07	1.95857e+07	1.07087e+07	1.71044e+07	3.17202e+07	2.03498e+07	2.63276e+07	1.59916e+07	1.84647e+07	1.81561e+07	2.06958e+07
Indoleacrylic acid	3.67	level1			188.07	151	POS	1.96852e+07	1.54037e+07	1.40398e+07	1.63551e+07	1.38529e+07	1.95411e+07	2.14501e+07	1.32698e+07	1.77656e+07	1.7382e+07	1.83928e+07	1.69289e+07	1.69815e+07	1.79124e+07	1.62875e+07	1.45266e+07	1.87527e+07	2.1675e+07	1.95857e+07	1.07087e+07	1.71044e+07	3.17202e+07	2.03498e+07	2.63276e+07	1.59916e+07	1.84647e+07	1.81561e+07	2.06958e+07
gamma-Glutamylleucine	3.67	level1			259.129	57.9	NEG	2.06796e+07	1.34173e+07	7.82172e+06	1.26986e+07	8.31041e+06	1.69569e+07	5.09788e+06	7.00899e+06	4.65683e+06	5.5454e+06	2.77544e+06	2.96253e+06	1.45554e+06	518605	1.90764e+06	1.99226e+06	3.9163e+06	7.21874e+06	5.44223e+06	4.50912e+06	1.07348e+06	6.79096e+06	7.41589e+06	7.14034e+06	5.30044e+06	6.483e+06	7.33647e+06	6.10835e+06
5-methoxytryptophan	3.67	level1			235.107	49.1	POS	1.83582e+06	2.69355e+06	4.78119e+06	4.7606e+06	5.54577e+06	7.06021e+06	5.34623e+06	4.36997e+06	4.83837e+06	7.63617e+06	2.08644e+06	3.93921e+06	3.18031e+06	7.05365e+06	5.86446e+06	8.19685e+06	8.26758e+06	9.53293e+06	8.95593e+06	3.78728e+06	4.78019e+06	7.76314e+06	7.48849e+06	7.20093e+06	3.61432e+06	7.13351e+06	7.68349e+06	4.75327e+06
Pantothenic acid	3.67	level1			218.103	37.7	NEG	6.27754e+07	6.11167e+07	1.32258e+08	6.19056e+07	4.80085e+07	1.06711e+08	6.71825e+07	6.65383e+07	6.73239e+07	6.87412e+07	6.88514e+07	1.6513e+08	6.60287e+07	6.32113e+07	4.75358e+07	5.35693e+07	6.1053e+07	5.40773e+07	5.70142e+07	6.84317e+07	5.88375e+07	5.35742e+07	5.59839e+07	6.77202e+07	5.5898e+07	5.94545e+07	5.92044e+07	6.02712e+07
N-Acetylgalactosamine	3.67	level1			202.071	37.5	NEG	9.06034e+06	1.17434e+07	1.44096e+07	2.10008e+07	8.27527e+06	8.7704e+06	2.07822e+07	9.80729e+06	2.42613e+07	1.31577e+07	1.98343e+07	1.46121e+07	1.35968e+07	1.99604e+07	1.05913e+07	1.94565e+07	1.48259e+07	1.90323e+07	2.12974e+07	2.33752e+07	2.22741e+07	1.47398e+07	9.71271e+06	1.92083e+07	1.82455e+07	1.08008e+07	2.1104e+07	1.31878e+07
Mandelic acid	3.66	level1			151.04	141.8	NEG	2.35591e+07	2.91002e+07	2.93881e+07	2.56265e+07	2.31186e+07	2.4761e+07	3.29019e+07	3.4695e+07	3.95635e+07	3.37116e+07	4.22709e+07	3.64986e+07	2.36906e+07	1.92538e+07	1.89876e+07	1.09633e+07	1.75393e+07	1.8927e+07	1.15974e+07	1.22713e+07	1.02619e+07	1.4408e+07	1.18832e+07	1.63845e+07	2.39127e+07	2.38379e+07	2.36513e+07	2.35627e+07
2-Hydroxyoctanoic acid	3.66	level1			159.102	183.4	NEG	1.12278e+07	8.51298e+06	9.03886e+06	8.82869e+06	8.21359e+06	9.75332e+06	1.02982e+07	1.04485e+07	9.67176e+06	9.40734e+06	8.88462e+06	9.00942e+06	7.88064e+06	7.02735e+06	4.55544e+06	1.12629e+07	6.21307e+06	6.14718e+06	1.03611e+07	1.14819e+07	1.14696e+07	6.41194e+06	5.39735e+06	4.34844e+06	7.88363e+06	7.80322e+06	7.67463e+06	6.9164e+06
2-Ethyl-2-hydroxybutyric acid	3.66	level1			131.071	143.9	NEG	2.17786e+08	1.4229e+08	1.98374e+08	1.9859e+08	2.07251e+08	2.14039e+08	1.6468e+08	1.75916e+08	1.82882e+08	1.76767e+08	1.81656e+08	1.66272e+08	1.83223e+08	1.98058e+08	1.76068e+08	1.89034e+08	1.97481e+08	2.0245e+08	2.45197e+08	2.40511e+08	2.71459e+08	1.90549e+08	1.99562e+08	1.57599e+08	1.85709e+08	1.40098e+08	1.92988e+08	1.91633e+08
Ethyl 3-hydroxybenzoate	3.66	level1			165.055	160.5	NEG	3.0935e+08	2.94833e+08	2.56116e+08	2.87785e+08	2.58091e+08	3.39595e+08	2.40936e+08	2.73209e+08	2.37796e+08	3.05058e+08	2.29529e+08	2.66742e+08	2.01629e+08	1.90323e+08	2.2534e+08	2.0696e+08	2.14406e+08	2.62383e+08	2.73493e+08	2.56217e+08	3.06333e+08	2.35246e+08	2.27743e+08	1.90974e+08	2.54672e+08	2.49036e+08	2.5206e+08	2.51582e+08
2,4-Dihydroxybutanoic acid	3.66	level1			101.024	45.6	NEG	1.18916e+08	1.20017e+08	1.2417e+08	1.1029e+08	1.42298e+08	1.18775e+08	1.12656e+08	1.11007e+08	1.13556e+08	1.12454e+08	1.10507e+08	1.1019e+08	1.08109e+08	1.03986e+08	1.18844e+08	1.0962e+08	1.14949e+08	1.15423e+08	1.15625e+08	1.14267e+08	1.91631e+07	1.12961e+08	1.43857e+07	1.11957e+08	1.04032e+08	1.16175e+08	1.16173e+08	1.15525e+08
2',4',6'-Trihydroxyacetophenone	3.66	level1			167.034	153.4	NEG	1.12863e+08	1.19153e+08	9.21546e+07	1.02157e+08	1.10998e+08	1.3132e+08	9.3117e+07	9.19984e+07	8.15373e+07	8.78855e+07	8.73549e+07	6.88922e+07	7.52698e+07	7.25782e+07	9.85863e+07	9.36316e+07	9.845e+07	8.54573e+07	7.73978e+07	7.0827e+07	9.48494e+07	7.7706e+07	6.9362e+07	6.059e+07	9.10923e+07	8.5321e+07	8.91716e+07	8.9555e+07
Oleic acid	3.66	level1			281.247	351	NEG	2.8211e+07	3.61485e+07	4.73549e+07	2.97034e+07	4.48367e+07	3.82793e+07	3.90009e+07	5.66582e+07	2.97905e+07	5.22619e+07	2.89874e+07	4.07144e+07	4.46906e+07	3.76777e+07	4.10316e+07	3.53904e+07	4.21132e+07	5.19391e+07	2.79974e+07	2.64641e+07	4.22541e+07	3.4619e+07	4.15673e+07	4.41222e+07	3.57365e+07	3.67995e+07	2.27294e+07	1.72371e+07
trans-Vaccenic acid	3.66	level1			281.247	351	NEG	2.8211e+07	3.61485e+07	4.73549e+07	2.97034e+07	4.48367e+07	3.82793e+07	3.90009e+07	5.66582e+07	2.97905e+07	5.22619e+07	2.89874e+07	4.07144e+07	4.46906e+07	3.76777e+07	4.10316e+07	3.53904e+07	4.21132e+07	5.19391e+07	2.79974e+07	2.64641e+07	4.22541e+07	3.4619e+07	4.15673e+07	4.41222e+07	3.57365e+07	3.67995e+07	2.27294e+07	1.72371e+07
1-Oleoyl-sn-glycerol 3-phosphate	3.66	level1			435.25	312.8	NEG	5.04475e+06	6.03244e+06	5.2968e+06	6.21638e+06	5.53154e+06	6.45706e+06	1.1347e+07	1.1581e+07	6.35493e+06	9.07196e+06	7.38678e+06	1.3378e+07	6.62599e+06	9.58368e+06	1.18339e+07	1.68411e+07	1.36182e+07	9.28042e+06	8.33508e+06	1.05216e+07	9.73972e+06	7.5009e+06	7.8991e+06	7.84892e+06	8.65215e+06	9.41083e+06	8.71505e+06	8.06695e+06
Monobutyl phthalate	3.66	level1			205.085	271.9	POS	5.51227e+06	6.35148e+06	4.78027e+06	5.2212e+06	7.04033e+06	5.01231e+06	9.01977e+06	7.87193e+06	1.08652e+07	7.481e+06	9.26916e+06	8.46983e+06	6.15428e+06	4.50039e+06	4.57201e+06	4.86973e+06	4.87736e+06	4.77004e+06	5.02157e+06	5.30468e+06	7.13687e+06	5.17393e+06	4.18607e+06	4.477e+06	5.30138e+06	5.95142e+06	5.86477e+06	6.34045e+06
Hydrocortisone acetate	3.66	level1			385.204	270.5	NEG	1.51261e+06	805551	1.18657e+06	1.45975e+06	1.3288e+06	1.60837e+06	2.02404e+06	2.68829e+06	3.05338e+06	4.39264e+06	2.64277e+06	3.23315e+06	919643	583703	1.41606e+06	1.36252e+06	1.26678e+06	2.15721e+06	1.75843e+06	2.4578e+06	2.09962e+06	3.17244e+06	3.41439e+06	1.97035e+06	1.77771e+06	1.8236e+06	1.69793e+06	2.24632e+06
Pactimibe	3.66	level1			399.299	227	POS	1.59577e+07	1.04335e+07	5.74632e+06	1.33066e+07	2.74387e+07	1.57422e+07	1.32476e+07	3.65799e+07	1.18291e+07	2.08947e+07	1.20654e+07	8.73938e+06	1.03617e+07	2.15556e+07	2.43234e+07	3.51923e+07	1.36124e+07	3.13409e+07	1.20231e+07	9.77638e+06	1.03577e+07	2.07204e+07	1.96577e+07	1.99123e+07	2.03438e+07	1.67042e+07	1.9711e+07	2.07237e+07
2-Methyl-11-oxo-11H-pyrido[2,1-b]quinazoline-6-carboxylic acid	3.66	level1			255.075	213.1	POS	3.29161e+07	3.17418e+07	2.89273e+07	3.15168e+07	2.44613e+07	3.25226e+07	2.0174e+07	2.2907e+07	2.65392e+07	2.45905e+07	2.2322e+07	1.99489e+07	1.10496e+07	8.16268e+06	8.67863e+06	8.96259e+06	1.2066e+07	1.2578e+07	1.01277e+07	8.78098e+06	8.24479e+06	1.49177e+07	1.34209e+07	1.34379e+07	1.8541e+07	1.90229e+07	2.03036e+07	1.88578e+07
Iraldeine	3.66	level1			191.143	210.9	NEG	6.19478e+06	8.96895e+06	8.88571e+06	6.04811e+06	1.16447e+07	6.87673e+06	8.27534e+06	3.94405e+06	1.18764e+07	7.59078e+06	1.17631e+07	7.97766e+06	7.77091e+06	9.6968e+06	1.2299e+07	1.64082e+07	1.52965e+07	5.86146e+06	8.65341e+06	1.17029e+07	8.14458e+06	2.033e+06	2.68675e+06	4.65263e+06	8.64373e+06	7.67501e+06	7.11793e+06	8.23644e+06
4-Vinylphenol	3.66	level1			119.05	179.3	NEG	1.47464e+07	1.92483e+07	1.78412e+07	2.17658e+07	1.15762e+07	1.66771e+07	1.62421e+07	1.69798e+07	1.26552e+07	2.46018e+07	2.64619e+07	1.08565e+07	9.8309e+06	4.53967e+06	6.48245e+06	4.916e+06	8.01697e+06	2.54732e+06	1.5305e+06	3.85049e+06	1.36989e+06	1.37816e+06	3.63828e+06	1.41087e+06	1.05786e+07	9.4061e+06	9.46213e+06	9.0994e+06
Hippuric acid	3.66	level1			178.05	176.8	NEG	4.99307e+06	1.9717e+06	5.60585e+06	2.935e+06	2.0018e+06	3.35545e+06	2.6734e+06	3.18828e+06	2.30662e+06	2.82274e+06	1.94454e+06	2.17942e+06	3.06319e+06	2.79604e+06	1.7064e+06	1.35294e+06	1.60374e+06	2.21759e+06	2.16737e+06	1.71648e+06	1.79645e+06	1.40166e+06	1.8036e+06	2.3348e+06	1.99673e+06	2.95656e+06	2.98354e+06	2.04783e+06
Cortexolone	3.66	level1			347.221	175.3	POS	1.45304e+07	6.13052e+06	4.56143e+06	4.48947e+06	1.34027e+07	7.50829e+06	8.8642e+06	5.79105e+07	3.30751e+06	1.66423e+07	1.13038e+07	7.0609e+06	7.20961e+07	8.05676e+07	4.02184e+07	6.27042e+07	7.5452e+07	9.48648e+07	3.05762e+07	2.44792e+07	4.37289e+07	1.95729e+07	4.88607e+07	1.21807e+07	2.85149e+07	3.39119e+07	3.06586e+07	3.60555e+07
Dethiobiotin	3.66	level1			215.138	173.3	POS	1.02088e+07	1.08594e+07	1.1895e+07	9.95649e+06	1.09125e+07	1.10745e+07	1.65727e+07	1.90773e+07	1.59927e+07	1.74417e+07	1.91016e+07	1.58996e+07	1.20548e+07	1.27382e+07	1.13786e+07	9.12505e+06	1.05751e+07	1.04222e+07	8.98083e+06	7.49681e+06	7.88065e+06	1.09272e+07	9.96938e+06	1.29172e+07	1.23721e+07	1.182e+07	1.09458e+07	1.29902e+07
Butyllactate	3.66	level1			145.086	165.3	NEG	6.05275e+06	3.53617e+06	4.09882e+06	3.9835e+06	4.30566e+06	4.49601e+06	5.71705e+06	5.17783e+06	5.82187e+06	5.63262e+06	5.502e+06	6.986e+06	4.74594e+06	5.73103e+06	5.60343e+06	4.9326e+06	4.10284e+06	4.62362e+06	4.29222e+06	964305	4.15439e+06	4.98213e+06	4.45252e+06	4.53169e+06	5.10609e+06	5.25857e+06	4.25908e+06	4.96495e+06
Caffeic acid	3.66	level1			179.034	159.9	NEG	1.07041e+07	3.23013e+07	2.94781e+07	2.31684e+07	4.24095e+07	1.76388e+07	6.83336e+07	6.59201e+07	6.3005e+07	1.30029e+08	2.25479e+08	6.05304e+07	6.19111e+07	5.41792e+07	1.0488e+08	1.15436e+08	1.10484e+08	5.93031e+07	4.64934e+07	5.29796e+07	3.60179e+07	6.4226e+07	4.96976e+07	6.93423e+07	6.34364e+07	6.52755e+07	6.39132e+07	6.55881e+07
Pipemidic acid	3.66	level1			302.132	147.2	NEG	1.89749e+07	1.92708e+07	2.318e+07	1.71503e+07	1.68454e+07	1.50696e+07	2.30918e+07	2.02912e+07	2.32536e+07	2.04332e+07	1.88635e+07	2.67778e+07	2.33649e+07	2.54928e+07	1.94996e+07	1.51308e+07	1.67509e+07	2.34368e+07	1.58198e+07	1.90141e+07	1.87467e+07	1.1259e+07	1.54275e+07	2.03331e+07	1.93794e+07	2.05008e+07	2.33484e+07	2.17552e+07
Articaine (hydrochloride)	3.66	level1			267.121	146.6	POS	2.12181e+07	1.93128e+07	2.35088e+07	1.8835e+07	1.89807e+07	2.06163e+07	2.1951e+07	2.43207e+07	2.48328e+07	2.23884e+07	2.2999e+07	2.19254e+07	2.53597e+07	2.74649e+07	2.27949e+07	2.12771e+07	2.08795e+07	2.0683e+07	2.12896e+07	1.99868e+07	1.86672e+07	1.86942e+07	1.93187e+07	1.8926e+07	2.1268e+07	2.13162e+07	2.16687e+07	1.9599e+07
4-Hydroxycinnamic acid	3.66	level1			163.039	133.8	NEG	4.61116e+07	3.0836e+07	3.27286e+07	3.06512e+07	2.30166e+07	2.37699e+07	3.11042e+07	2.29299e+07	2.56566e+07	2.43689e+07	2.57087e+07	2.30714e+07	2.56302e+07	2.28477e+07	2.21298e+07	2.0835e+07	2.63466e+07	2.67507e+07	2.72815e+07	2.79955e+07	3.914e+07	2.49185e+07	3.58662e+07	2.52034e+07	3.73336e+07	2.45914e+07	2.63344e+07	2.53015e+07
Hydroxyphenyllactic acid	3.66	level1			181.05	50.2	NEG	3.0234e+07	2.94666e+07	4.26999e+07	2.88033e+07	3.94229e+07	2.74438e+07	2.77471e+07	6.54282e+07	3.5416e+07	6.35515e+07	3.14536e+07	3.21043e+07	4.42744e+07	2.22148e+07	3.24475e+07	1.45867e+07	1.89269e+07	2.54445e+07	2.04984e+07	1.97047e+07	2.03813e+07	2.40872e+07	2.12666e+07	1.95115e+07	2.53027e+07	2.66912e+07	4.84994e+07	2.96888e+07
3-Hydroxybenzoic acid	3.65	level1			137.024	167	NEG	5.5213e+07	5.42184e+07	4.71122e+07	4.15699e+07	6.81893e+07	6.52044e+07	3.41199e+07	3.71787e+07	3.72245e+07	4.99052e+07	3.86179e+07	3.44406e+07	4.38379e+07	4.27311e+07	6.26702e+07	8.02988e+07	7.66367e+07	8.16045e+07	1.0842e+08	1.52482e+08	1.68274e+08	5.0796e+07	5.19555e+07	5.06926e+07	6.35802e+07	6.14699e+07	6.30126e+07	6.47109e+07
5-Hydroxyhexanoic acid	3.65	level1			131.071	143.9	NEG	2.17786e+08	1.4229e+08	1.98374e+08	1.9859e+08	2.07251e+08	2.14039e+08	1.6468e+08	1.75916e+08	1.82882e+08	1.76767e+08	1.81656e+08	1.66272e+08	1.83223e+08	1.98058e+08	1.76068e+08	1.89034e+08	1.97481e+08	2.0245e+08	2.45197e+08	2.40511e+08	2.71459e+08	1.90549e+08	1.99562e+08	1.57599e+08	1.85709e+08	1.40098e+08	1.92988e+08	1.91633e+08
Gentisic acid	3.65	level1			153.018	59.7	NEG	1.56501e+07	3.67508e+07	4.9755e+07	3.2044e+07	4.32489e+07	5.11698e+07	5.3618e+07	5.43816e+07	5.21335e+07	8.77176e+07	1.36041e+08	5.34254e+07	5.83027e+07	4.87846e+07	9.31241e+07	1.56263e+08	6.08822e+07	6.69664e+07	3.29295e+07	4.98346e+07	5.02092e+07	5.01105e+07	5.19175e+07	7.96169e+07	6.46761e+07	6.26017e+07	6.46553e+07	5.21449e+07
3-Methyladipic acid	3.65	level1			159.065	152.8	NEG	9.91265e+07	1.14061e+08	1.41193e+08	8.00208e+07	8.60407e+07	1.27463e+08	1.43728e+08	1.32483e+08	1.35562e+08	1.49284e+08	1.28169e+08	1.40875e+08	1.25758e+08	1.20002e+08	1.15827e+08	1.0076e+08	1.03316e+08	9.7837e+07	1.6433e+08	1.62462e+08	1.33725e+08	1.21322e+08	1.2825e+08	1.05358e+08	1.1546e+08	1.20814e+08	1.22408e+08	1.13799e+08
Ethyl 4-hydroxybenzoate	3.65	level1			165.055	160.5	NEG	3.0935e+08	2.94833e+08	2.56116e+08	2.87785e+08	2.58091e+08	3.39595e+08	2.40936e+08	2.73209e+08	2.37796e+08	3.05058e+08	2.29529e+08	2.66742e+08	2.01629e+08	1.90323e+08	2.2534e+08	2.0696e+08	2.14406e+08	2.62383e+08	2.73493e+08	2.56217e+08	3.06333e+08	2.35246e+08	2.27743e+08	1.90974e+08	2.54672e+08	2.49036e+08	2.5206e+08	2.51582e+08
N-Acetylglucosamine	3.65	level1			202.071	37.5	NEG	9.06034e+06	1.17434e+07	1.44096e+07	2.10008e+07	8.27527e+06	8.7704e+06	2.07822e+07	9.80729e+06	2.42613e+07	1.31577e+07	1.98343e+07	1.46121e+07	1.35968e+07	1.99604e+07	1.05913e+07	1.94565e+07	1.48259e+07	1.90323e+07	2.12974e+07	2.33752e+07	2.22741e+07	1.47398e+07	9.71271e+06	1.92083e+07	1.82455e+07	1.08008e+07	2.1104e+07	1.31878e+07
Corticosterone	3.65	level1			347.221	175.3	POS	1.45304e+07	6.13052e+06	4.56143e+06	4.48947e+06	1.34027e+07	7.50829e+06	8.8642e+06	5.79105e+07	3.30751e+06	1.66423e+07	1.13038e+07	7.0609e+06	7.20961e+07	8.05676e+07	4.02184e+07	6.27042e+07	7.5452e+07	9.48648e+07	3.05762e+07	2.44792e+07	4.37289e+07	1.95729e+07	4.88607e+07	1.21807e+07	2.85149e+07	3.39119e+07	3.06586e+07	3.60555e+07
Deoxycholic acid	3.65	level1			391.283	324	NEG	8.12391e+06	9.02874e+06	7.92447e+06	5.7557e+06	6.08929e+06	9.1087e+06	6.06007e+06	5.75161e+06	8.3113e+06	7.32461e+06	5.27401e+06	6.19056e+06	7.46868e+06	7.34546e+06	7.02507e+06	5.18519e+06	4.88103e+06	5.50884e+06	5.27656e+06	5.13113e+06	6.72827e+06	3.056e+06	2.32431e+06	3.56153e+06	6.68738e+06	5.78694e+06	7.04333e+06	5.60329e+06
Chenodeoxycholic acid	3.65	level1			391.283	324	NEG	8.12391e+06	9.02874e+06	7.92447e+06	5.7557e+06	6.08929e+06	9.1087e+06	6.06007e+06	5.75161e+06	8.3113e+06	7.32461e+06	5.27401e+06	6.19056e+06	7.46868e+06	7.34546e+06	7.02507e+06	5.18519e+06	4.88103e+06	5.50884e+06	5.27656e+06	5.13113e+06	6.72827e+06	3.056e+06	2.32431e+06	3.56153e+06	6.68738e+06	5.78694e+06	7.04333e+06	5.60329e+06
Docosahexaenoic acid (DHA)	3.65	level1			329.246	267.9	POS	1.5252e+07	1.80314e+07	1.26557e+07	1.56692e+07	1.92923e+07	1.41443e+07	1.27485e+07	2.2673e+07	1.51725e+07	1.38412e+07	9.77265e+06	1.22807e+07	1.97407e+07	1.97912e+07	1.99363e+07	2.24536e+07	1.98801e+07	2.08881e+07	2.20765e+07	2.209e+07	2.16275e+07	1.08716e+07	1.16793e+07	1.23235e+07	1.66299e+07	1.50648e+07	1.74297e+07	1.75613e+07
3-Ethylphenol	3.65	level1			123.08	195.9	POS	1.5981e+07	1.50299e+07	1.50829e+07	1.43584e+07	1.4721e+07	1.71819e+07	1.3545e+07	7.7847e+06	1.51017e+07	1.25934e+07	1.34611e+07	1.29652e+07	9.52739e+06	1.40695e+07	1.06727e+07	9.44661e+06	8.24038e+06	1.47044e+07	1.31936e+07	8.66473e+06	1.03211e+07	1.18187e+07	6.5395e+06	1.35792e+07	1.30097e+07	1.14582e+07	1.48271e+07	1.23173e+07
2,3-Dimethylphenol	3.65	level1			123.08	195.9	POS	1.5981e+07	1.50299e+07	1.50829e+07	1.43584e+07	1.4721e+07	1.71819e+07	1.3545e+07	7.7847e+06	1.51017e+07	1.25934e+07	1.34611e+07	1.29652e+07	9.52739e+06	1.40695e+07	1.06727e+07	9.44661e+06	8.24038e+06	1.47044e+07	1.31936e+07	8.66473e+06	1.03211e+07	1.18187e+07	6.5395e+06	1.35792e+07	1.30097e+07	1.14582e+07	1.48271e+07	1.23173e+07
2,6-Dimethylphenol	3.65	level1			123.08	195.9	POS	1.5981e+07	1.50299e+07	1.50829e+07	1.43584e+07	1.4721e+07	1.71819e+07	1.3545e+07	7.7847e+06	1.51017e+07	1.25934e+07	1.34611e+07	1.29652e+07	9.52739e+06	1.40695e+07	1.06727e+07	9.44661e+06	8.24038e+06	1.47044e+07	1.31936e+07	8.66473e+06	1.03211e+07	1.18187e+07	6.5395e+06	1.35792e+07	1.30097e+07	1.14582e+07	1.48271e+07	1.23173e+07
2,5-Dimethylphenol	3.65	level1			123.08	195.9	POS	1.5981e+07	1.50299e+07	1.50829e+07	1.43584e+07	1.4721e+07	1.71819e+07	1.3545e+07	7.7847e+06	1.51017e+07	1.25934e+07	1.34611e+07	1.29652e+07	9.52739e+06	1.40695e+07	1.06727e+07	9.44661e+06	8.24038e+06	1.47044e+07	1.31936e+07	8.66473e+06	1.03211e+07	1.18187e+07	6.5395e+06	1.35792e+07	1.30097e+07	1.14582e+07	1.48271e+07	1.23173e+07
NG 52	3.65	level1			347.137	189.3	POS	3.90985e+07	4.22505e+07	2.71178e+07	3.25652e+07	2.5422e+07	3.81442e+07	3.5809e+07	5.78152e+07	3.02773e+07	4.72426e+07	3.1372e+07	2.42537e+07	1.63225e+07	1.38733e+07	1.98134e+07	0	1.38295e+07	2.66106e+07	1.29287e+07	7.79448e+06	7.43022e+06	5.45e+07	3.98263e+07	4.32545e+07	2.62303e+07	2.92803e+07	2.89728e+07	2.76183e+07
Indole-3-methyl acetate	3.65	level1			188.071	178.7	NEG	3.75473e+06	3.94929e+06	4.9579e+06	3.05094e+06	3.93185e+06	3.8601e+06	6.14565e+06	5.25726e+06	5.64808e+06	1.15737e+07	4.77819e+06	2.17594e+07	3.21676e+06	2.84299e+06	2.50834e+06	2.05166e+06	1.59737e+06	2.18375e+06	5.27912e+06	6.00854e+06	4.26636e+06	4.57865e+06	4.4119e+06	3.62295e+06	5.40919e+06	4.88378e+06	4.47886e+06	5.29706e+06
Phe-Pro	3.65	level1			263.137	152.4	POS	2.04836e+07	2.74575e+07	1.82213e+07	2.73176e+07	1.2287e+07	2.45055e+07	1.60488e+07	1.48687e+07	1.63461e+07	1.33913e+07	1.67583e+07	1.1906e+07	1.28041e+07	1.15709e+07	8.27277e+06	7.4605e+06	1.03794e+07	1.21955e+07	6.65188e+06	4.18776e+06	3.86531e+06	1.06184e+07	6.91082e+06	1.17328e+07	1.22827e+07	1.21812e+07	1.33778e+07	1.23333e+07
Prolylhydroxyproline	3.65	level1			227.103	40.9	NEG	1.22253e+07	1.07251e+07	1.05255e+07	1.29724e+07	7.25984e+06	1.14329e+07	6.97843e+06	6.37917e+06	7.31728e+06	7.80393e+06	5.17441e+06	5.35497e+06	4.84569e+06	3.40143e+06	1.22387e+07	5.87397e+06	7.22002e+06	9.16039e+06	7.25382e+06	1.70958e+07	7.07971e+06	8.87738e+06	7.4897e+06	7.49149e+06	6.02174e+06	8.4499e+06	7.60225e+06	7.8093e+06
Val-Met	3.65	level1			247.117	32.6	NEG	4.13691e+06	4.67e+06	6.33556e+06	2.69353e+06	4.19714e+06	5.26534e+06	5.63743e+06	4.53615e+06	5.9292e+06	6.78409e+06	5.64616e+06	6.42074e+06	5.4821e+06	6.14444e+06	6.38588e+06	6.09194e+06	5.61972e+06	3.79715e+06	6.71962e+06	6.69386e+06	8.32172e+06	3.10101e+06	3.03544e+06	5.37867e+06	5.23325e+06	5.55352e+06	5.65267e+06	4.92145e+06
Vanillic acid	3.64	level1			167.034	153.4	NEG	1.12863e+08	1.19153e+08	9.21546e+07	1.02157e+08	1.10998e+08	1.3132e+08	9.3117e+07	9.19984e+07	8.15373e+07	8.78855e+07	8.73549e+07	6.88922e+07	7.52698e+07	7.25782e+07	9.85863e+07	9.36316e+07	9.845e+07	8.54573e+07	7.73978e+07	7.0827e+07	9.48494e+07	7.7706e+07	6.9362e+07	6.059e+07	9.10923e+07	8.5321e+07	8.91716e+07	8.9555e+07
Adipic acid	3.64	level1			145.05	63	NEG	2.74212e+07	2.53851e+07	2.86373e+07	2.77965e+07	2.28728e+07	2.32901e+07	2.67265e+07	3.18352e+07	2.70202e+07	2.98333e+07	2.65851e+07	2.69263e+07	2.42973e+07	3.22665e+07	1.3354e+07	2.25087e+07	2.32657e+07	3.01013e+07	2.86375e+07	1.60012e+07	1.5419e+07	3.05056e+07	1.60639e+07	2.64908e+07	2.91519e+07	2.80032e+07	2.91767e+07	2.75333e+07
2-Hydroxycinnamic acid	3.64	level1			163.039	133.8	NEG	4.61116e+07	3.0836e+07	3.27286e+07	3.06512e+07	2.30166e+07	2.37699e+07	3.11042e+07	2.29299e+07	2.56566e+07	2.43689e+07	2.57087e+07	2.30714e+07	2.56302e+07	2.28477e+07	2.21298e+07	2.0835e+07	2.63466e+07	2.67507e+07	2.72815e+07	2.79955e+07	3.914e+07	2.49185e+07	3.58662e+07	2.52034e+07	3.73336e+07	2.45914e+07	2.63344e+07	2.53015e+07
Tetradecyl sulfate (sodium)	3.64	level1			293.177	302.2	NEG	5.89933e+07	6.43683e+07	5.49201e+07	5.87848e+07	4.47778e+07	6.52733e+07	3.02534e+07	2.35293e+07	3.39644e+07	3.00794e+07	1.86903e+07	2.00525e+07	1.02128e+08	1.21488e+08	5.43041e+07	7.71999e+07	6.38127e+07	9.93336e+07	6.6358e+07	3.70624e+07	2.86026e+07	6.92459e+07	3.95732e+07	7.66812e+07	5.89002e+07	5.34961e+07	5.77159e+07	5.89701e+07
all-trans-5,6-Epoxyretinoic acid	3.64	level1			315.195	252.1	NEG	5.38493e+06	8.60447e+06	8.23866e+06	6.80629e+06	7.83134e+06	8.24021e+06	7.61132e+06	7.05034e+06	8.51123e+06	1.00123e+07	7.63604e+06	8.0512e+06	7.69361e+06	9.62564e+06	1.09712e+07	1.62594e+07	8.5125e+06	8.39741e+06	1.34751e+07	1.91998e+07	1.05676e+07	1.17918e+07	1.19728e+07	1.17857e+07	9.35463e+06	9.4757e+06	9.11357e+06	1.00918e+07
SKF-82958 (hydrobromide)	3.64	level1			330.122	193.6	POS	2.2239e+07	2.28559e+07	2.91674e+07	2.22296e+07	1.90541e+07	2.32876e+07	3.17859e+07	3.59259e+07	4.01713e+07	5.43221e+07	3.38054e+07	3.61376e+07	1.78605e+07	1.69187e+07	9.18628e+06	7.93706e+06	1.00142e+07	1.67207e+07	1.51541e+07	1.5968e+07	1.08889e+07	1.45351e+07	1.63361e+07	1.80681e+07	2.14878e+07	2.25576e+07	2.16709e+07	2.18637e+07
Harmalol (hydrochloride)	3.64	level1			201.101	185.9	POS	8.01075e+06	4.06948e+06	1.07104e+06	2.94384e+06	1.29134e+07	7.95967e+06	1.87742e+07	3.70587e+07	8.75348e+06	1.6019e+07	2.49163e+07	8.76076e+06	3.07286e+07	3.15327e+07	2.44389e+07	5.67331e+07	3.88213e+07	4.13484e+07	3.45e+07	1.00482e+07	3.6065e+07	4.75934e+07	3.2553e+07	8.95386e+06	1.87132e+07	2.15841e+07	2.00683e+07	2.08799e+07
Roxatidine (Acetate Hydrochloride)	3.64	level1			349.21	180	POS	1.78142e+07	1.9103e+07	1.84962e+07	1.50079e+07	2.15196e+07	1.97613e+07	1.21124e+07	8.25072e+06	1.42415e+07	1.33131e+07	1.14397e+07	1.17795e+07	1.27969e+07	1.17043e+07	1.93894e+07	1.49394e+07	1.52122e+07	1.52634e+07	1.5689e+07	3.06047e+07	2.23119e+07	1.40127e+07	8.90256e+06	1.56141e+07	1.51901e+07	2.32172e+07	2.40147e+07	1.4997e+07
3-Succinoylpyridine	3.64	level1			180.064	140.5	POS	7.54419e+06	7.86692e+06	6.07248e+06	6.64069e+06	1.55073e+07	5.56407e+06	5.86875e+06	7.29933e+06	7.93259e+06	3.96056e+07	8.59653e+06	8.71251e+06	2.95644e+07	1.14232e+07	1.24386e+07	1.43298e+07	1.17262e+07	1.58576e+07	1.34523e+07	8.64414e+06	1.10227e+07	1.27132e+07	1.03247e+07	6.18413e+06	8.02726e+06	9.78767e+06	8.96939e+06	7.84914e+06
4-Hydroxybenzoic acid	3.63	level1			137.024	167	NEG	5.5213e+07	5.42184e+07	4.71122e+07	4.15699e+07	6.81893e+07	6.52044e+07	3.41199e+07	3.71787e+07	3.72245e+07	4.99052e+07	3.86179e+07	3.44406e+07	4.38379e+07	4.27311e+07	6.26702e+07	8.02988e+07	7.66367e+07	8.16045e+07	1.0842e+08	1.52482e+08	1.68274e+08	5.0796e+07	5.19555e+07	5.06926e+07	6.35802e+07	6.14699e+07	6.30126e+07	6.47109e+07
Tramiprosate	3.63	level1			138.019	35.3	NEG	2.21159e+07	1.48498e+07	1.75436e+07	1.32195e+07	1.60446e+07	1.52248e+07	2.15498e+07	1.87635e+07	3.03216e+07	2.39445e+07	2.28987e+07	2.53e+07	5.82288e+07	6.345e+07	2.10578e+07	6.27414e+07	6.42602e+07	5.9346e+07	6.47665e+07	7.40266e+07	6.29258e+07	5.65821e+07	5.75058e+07	2.05121e+07	5.6805e+07	2.10826e+07	5.96874e+07	2.01567e+07
Neantine	3.63	level1			205.085	271.9	POS	5.51227e+06	6.35148e+06	4.78027e+06	5.2212e+06	7.04033e+06	5.01231e+06	9.01977e+06	7.87193e+06	1.08652e+07	7.481e+06	9.26916e+06	8.46983e+06	6.15428e+06	4.50039e+06	4.57201e+06	4.86973e+06	4.87736e+06	4.77004e+06	5.02157e+06	5.30468e+06	7.13687e+06	5.17393e+06	4.18607e+06	4.477e+06	5.30138e+06	5.95142e+06	5.86477e+06	6.34045e+06
Prostaglandin J2	3.63	level1			317.21	278	POS	4.41906e+07	4.9864e+07	4.67063e+07	5.36962e+07	5.01734e+07	2.4413e+07	1.42436e+07	4.66256e+07	4.08151e+07	4.18644e+07	3.60035e+07	4.54851e+07	4.11395e+07	3.91734e+07	5.24033e+07	4.46288e+07	3.67826e+07	4.48334e+07	3.24311e+07	4.38343e+07	2.71544e+07	1.29121e+07	3.83852e+07	4.93758e+07	4.1109e+07	4.44124e+07	4.14325e+07	4.60245e+07
3-Cresotinic acid	3.62	level1			151.04	161.5	NEG	1.7245e+08	1.93592e+08	2.21885e+08	1.75271e+08	1.78164e+08	1.58151e+08	2.48223e+08	2.56715e+08	2.47085e+08	2.51489e+08	2.68074e+08	2.58394e+08	2.31486e+08	2.66308e+08	1.87439e+08	1.58568e+08	1.94499e+08	2.49485e+08	1.95929e+08	1.39772e+08	1.22208e+08	2.6081e+08	2.21975e+08	3.16087e+08	2.12991e+08	2.09422e+08	2.11924e+08	2.12518e+08
Pimelic acid	3.62	level1			159.065	152.8	NEG	9.91265e+07	1.14061e+08	1.41193e+08	8.00208e+07	8.60407e+07	1.27463e+08	1.43728e+08	1.32483e+08	1.35562e+08	1.49284e+08	1.28169e+08	1.40875e+08	1.25758e+08	1.20002e+08	1.15827e+08	1.0076e+08	1.03316e+08	9.7837e+07	1.6433e+08	1.62462e+08	1.33725e+08	1.21322e+08	1.2825e+08	1.05358e+08	1.1546e+08	1.20814e+08	1.22408e+08	1.13799e+08
Camphor	3.62	level1			153.126	276.5	POS	6.20636e+06	5.02428e+06	7.85531e+06	7.04497e+06	8.30573e+06	7.37072e+06	6.50023e+06	7.08034e+06	5.97859e+06	6.15444e+06	5.27345e+06	4.7365e+06	2.67095e+06	3.71501e+06	4.19951e+06	3.11095e+06	1.95853e+06	3.43897e+06	3.92559e+06	5.64027e+06	4.46703e+06	4.30645e+06	4.53596e+06	4.67468e+06	4.97904e+06	9.23431e+06	4.98433e+06	4.93691e+06
Bullatine B	3.62	level1			420.272	203.2	POS	819804	1.50469e+06	2.27116e+06	2.06283e+06	2.47947e+06	569493	5.31447e+06	4.2904e+06	6.10031e+06	2.81643e+06	2.10936e+06	2.75753e+06	165670	0	0	0	0	276050	326915	270601	0	588141	845659	700171	1.09258e+06	1.7972e+06	1.19385e+06	898346
Nikethamide	3.62	level1			179.117	190.6	POS	5.77109e+07	7.65206e+07	6.73771e+07	6.40972e+07	6.59968e+07	6.15869e+07	6.09245e+07	5.90367e+07	6.66789e+07	6.25738e+07	5.54256e+07	5.80502e+07	5.72309e+07	5.38412e+07	7.15308e+07	3.79471e+07	1.38768e+08	5.12243e+07	4.87943e+07	5.27641e+07	5.09976e+07	3.73248e+07	4.97341e+07	1.17844e+08	6.20046e+07	5.85555e+07	5.88292e+07	5.88889e+07
Isosinensetin	3.62	level1			373.127	177.5	POS	1.10336e+07	1.14193e+07	1.2047e+07	9.41948e+06	1.21235e+07	1.04602e+07	1.56356e+07	1.31496e+07	1.62753e+07	1.47165e+07	1.56523e+07	1.51351e+07	1.14102e+07	1.20137e+07	1.00209e+07	1.15587e+07	1.05972e+07	9.589e+06	8.90441e+06	6.34777e+06	6.75498e+06	7.45657e+06	6.84529e+06	1.01258e+07	1.05166e+07	1.17152e+07	1.18309e+07	1.22219e+07
2-Methylbutyrylglycine	3.62	level1			158.081	141.2	NEG	1.67516e+07	1.73164e+07	1.74496e+07	1.33311e+07	1.48701e+07	1.2308e+07	1.44383e+07	1.84366e+07	1.7618e+07	9.37455e+06	1.06942e+07	1.23706e+07	7.72101e+06	7.22138e+06	7.46182e+06	7.13263e+06	1.12974e+07	1.68216e+07	6.95027e+06	1.37707e+07	1.53555e+07	1.11428e+07	1.10327e+07	1.09034e+07	1.09014e+07	1.44764e+07	1.37157e+07	1.3068e+07
Ethylmalonic acid	3.62	level1			131.035	95.4	NEG	1.43783e+07	1.31636e+07	8.82541e+06	1.25414e+07	9.36749e+06	1.21999e+07	1.10991e+07	1.29943e+07	8.08205e+06	8.73221e+06	1.23501e+07	1.04311e+07	1.0771e+07	8.76378e+06	1.15523e+07	8.18497e+06	1.17024e+07	1.09889e+07	2.39444e+07	2.39846e+07	1.16754e+07	6.35888e+06	1.10251e+07	1.12402e+07	8.51523e+06	8.49806e+06	1.40442e+07	1.08356e+07
3-Methylxanthine	3.61	level1			165.04	22.8	NEG	1.77858e+08	1.76124e+08	1.78059e+08	1.42151e+08	1.79678e+08	1.91449e+08	1.26542e+08	1.61646e+08	1.44788e+08	1.4901e+08	1.59015e+08	1.41626e+08	1.54321e+08	1.11224e+08	1.71652e+08	1.79926e+08	1.46752e+08	1.53969e+08	1.4838e+08	1.6075e+08	1.65281e+08	1.40601e+08	1.30587e+08	1.34157e+08	1.46444e+08	1.44912e+08	1.47769e+08	1.46989e+08
NAE(18:1)	3.61	level1			326.304	307.2	POS	1.74941e+07	1.76199e+07	2.01841e+07	2.02501e+07	2.66958e+07	1.91612e+07	2.895e+07	2.70067e+07	3.61172e+07	2.78737e+07	3.16607e+07	2.56704e+07	1.69662e+07	2.1434e+07	1.4592e+07	2.19237e+07	1.95756e+07	1.51917e+07	1.22923e+07	1.18743e+07	1.48524e+07	1.75256e+07	1.57387e+07	2.13692e+07	1.93706e+07	2.16117e+07	2.096e+07	1.99261e+07
Sulfamethazine	3.61	level1			277.082	141.8	NEG	1.08663e+07	1.48263e+07	8.45675e+06	1.43727e+07	9.17412e+06	1.2591e+07	1.25002e+07	9.1553e+06	1.31123e+07	1.05948e+07	1.09503e+07	7.31346e+06	1.87533e+07	2.15945e+07	5.3139e+07	1.11236e+07	1.35501e+07	2.87479e+07	1.28802e+07	1.39633e+07	6.63185e+06	2.05666e+07	1.84617e+07	2.47102e+07	1.33288e+07	1.7639e+07	1.71017e+07	1.12222e+07
2'-O-Methylinosine	3.61	level1			281.087	26.7	NEG	2.83884e+07	3.25975e+07	3.06642e+07	2.29968e+07	3.52179e+07	3.54679e+07	2.6287e+07	2.26063e+07	2.99485e+07	3.32878e+07	3.20988e+07	2.80739e+07	2.70732e+07	2.13796e+07	3.01554e+07	3.10853e+07	3.01744e+07	3.20879e+07	3.03568e+07	4.87719e+07	4.43632e+07	2.58458e+07	2.35235e+07	3.41359e+07	2.76365e+07	2.80082e+07	2.80194e+07	3.02649e+07
2,3-Dihydroxybenzoic acid (Pyrocatechuic acid)	3.6	level1			153.018	59.7	NEG	1.56501e+07	3.67508e+07	4.9755e+07	3.2044e+07	4.32489e+07	5.11698e+07	5.3618e+07	5.43816e+07	5.21335e+07	8.77176e+07	1.36041e+08	5.34254e+07	5.83027e+07	4.87846e+07	9.31241e+07	1.56263e+08	6.08822e+07	6.69664e+07	3.29295e+07	4.98346e+07	5.02092e+07	5.01105e+07	5.19175e+07	7.96169e+07	6.46761e+07	6.26017e+07	6.46553e+07	5.21449e+07
Methyl vanillate	3.6	level1			181.05	152.4	NEG	3.32747e+06	4.94436e+06	3.70823e+06	3.58007e+06	4.09336e+06	2.589e+06	4.38079e+06	3.51901e+06	6.65998e+06	3.33639e+06	7.80769e+06	5.01285e+06	3.20654e+06	4.04704e+06	3.26116e+06	3.88401e+06	3.44677e+06	2.15431e+06	3.70448e+06	3.91332e+06	6.02928e+06	983982	967021	2.37439e+06	4.12492e+06	2.91031e+06	3.30067e+06	3.49754e+06
3,5-Dimethoxybenzoic acid	3.6	level1			181.05	152.4	NEG	3.32747e+06	4.94436e+06	3.70823e+06	3.58007e+06	4.09336e+06	2.589e+06	4.38079e+06	3.51901e+06	6.65998e+06	3.33639e+06	7.80769e+06	5.01285e+06	3.20654e+06	4.04704e+06	3.26116e+06	3.88401e+06	3.44677e+06	2.15431e+06	3.70448e+06	3.91332e+06	6.02928e+06	983982	967021	2.37439e+06	4.12492e+06	2.91031e+06	3.30067e+06	3.49754e+06
2-Hydroxyestrone	3.6	level1			285.152	273.1	NEG	4.35091e+06	3.84485e+06	3.8826e+06	3.34005e+06	2.68887e+06	3.60138e+06	2.92849e+06	2.2989e+06	5.53066e+06	3.67724e+06	3.90135e+06	4.65962e+06	3.82781e+06	3.73901e+06	2.04244e+06	1.93263e+06	2.12513e+06	3.13414e+06	2.15045e+06	2.13328e+06	3.25997e+06	2.38151e+06	1.80087e+06	2.11691e+06	3.11711e+06	2.68017e+06	2.52834e+06	2.51914e+06
12-Hydroxydodecanoic acid	3.6	level1			215.164	270.9	NEG	1.06726e+06	875119	1.48652e+06	920021	2.01646e+06	1.97128e+06	1.77648e+06	1.76301e+06	1.24003e+06	3.31889e+06	759467	5.52156e+06	1.48113e+06	770192	1.95178e+06	1.86002e+06	2.31706e+06	1.84665e+06	1.15485e+07	1.23371e+07	1.87692e+07	4.97843e+06	6.36305e+06	2.79518e+06	3.77174e+06	3.46055e+06	3.99106e+06	4.30828e+06
Arachidonoylcarnitine (Car(20:4))	3.6	level1			448.339	231.6	POS	1.13871e+07	1.38255e+07	1.2626e+07	1.80968e+07	2.05158e+07	1.19182e+07	1.09927e+07	1.44971e+07	7.84225e+06	1.03869e+07	8.79331e+06	1.1382e+07	6.29353e+06	1.39772e+07	8.98624e+06	1.02035e+07	7.66105e+06	9.35365e+06	4.10777e+06	5.13036e+06	5.00477e+06	9.41128e+06	1.0124e+07	9.56078e+06	1.01996e+07	8.99876e+06	9.93876e+06	8.42151e+06
Butylphthalide	3.6	level1			191.106	198.5	POS	2.12147e+07	2.39836e+07	2.26353e+07	2.18215e+07	1.68951e+07	2.58718e+07	2.09046e+07	2.22124e+07	2.70209e+07	2.18678e+07	2.20715e+07	2.00142e+07	2.30765e+07	2.83853e+07	2.05497e+07	1.91305e+07	1.83072e+07	2.14645e+07	2.08085e+07	2.73136e+07	2.27105e+07	1.99061e+07	2.12214e+07	1.537e+07	2.1289e+07	2.13997e+07	1.74318e+07	2.44564e+07
Dehydroandrographolide succinate	3.6	level1			513.208	174.6	NEG	1.59632e+07	2.02853e+07	1.70559e+07	1.76312e+07	2.0461e+07	1.97209e+07	1.6663e+07	1.64236e+07	1.30337e+07	1.36895e+07	1.77079e+07	8.34286e+06	1.50274e+07	1.2913e+07	2.03177e+07	1.3085e+07	1.77991e+07	1.70014e+07	1.75356e+07	1.44507e+07	1.66479e+07	2.03605e+07	1.65855e+07	2.21314e+07	1.7519e+07	1.67897e+07	1.38376e+07	1.49159e+07
N-Formyltryptophan	3.6	level1			231.076	170.3	NEG	6.55786e+07	5.65684e+07	5.74161e+07	5.23592e+07	4.65966e+07	5.61199e+07	6.82614e+07	6.61197e+07	6.54595e+07	7.48178e+07	7.47162e+07	7.75838e+07	3.21758e+07	3.2277e+07	2.75458e+07	2.39849e+07	2.75445e+07	3.67462e+07	4.44565e+07	3.45926e+07	2.9125e+07	4.26882e+07	4.59879e+07	4.77805e+07	5.70279e+07	5.39102e+07	4.77608e+07	5.53712e+07
Phe-Val	3.6	level1			247.143	58.3	POS	6.79334e+06	1.45007e+06	1.37665e+06	0	3.66908e+06	2.8567e+06	3.71031e+06	6.3362e+06	4.50665e+06	9.22976e+06	1.72192e+06	3.78823e+06	6.62836e+06	5.37378e+06	7.87006e+06	1.1182e+07	8.64421e+06	1.85535e+07	1.31863e+07	5.19771e+06	7.24342e+06	7.82135e+06	7.51513e+06	1.04852e+07	4.72883e+06	6.07441e+06	4.01595e+06	4.65435e+06
5'-Deoxyadenosine	3.59	level1			232.082	45.6	NEG	1.06789e+07	1.31795e+07	8.86638e+06	1.43106e+07	7.21065e+06	1.24962e+07	5.95696e+06	6.50372e+06	7.41392e+06	6.87132e+06	5.81194e+06	4.85853e+06	5.20369e+06	4.70952e+06	5.93516e+06	5.66914e+06	6.70272e+06	7.46374e+06	8.19652e+06	9.0215e+06	1.0484e+07	1.7441e+06	7.30503e+06	6.43636e+06	7.45855e+06	7.74659e+06	1.10814e+07	7.37229e+06
5-Methoxysalicylic acid	3.59	level1			167.034	153.4	NEG	1.12863e+08	1.19153e+08	9.21546e+07	1.02157e+08	1.10998e+08	1.3132e+08	9.3117e+07	9.19984e+07	8.15373e+07	8.78855e+07	8.73549e+07	6.88922e+07	7.52698e+07	7.25782e+07	9.85863e+07	9.36316e+07	9.845e+07	8.54573e+07	7.73978e+07	7.0827e+07	9.48494e+07	7.7706e+07	6.9362e+07	6.059e+07	9.10923e+07	8.5321e+07	8.91716e+07	8.9555e+07
Succinyladenosine	3.59	level1			382.099	39.3	NEG	6.43932e+06	5.69333e+06	7.27758e+06	5.90382e+06	6.54463e+06	5.66621e+06	4.77272e+06	4.10843e+06	5.73609e+06	6.35629e+06	4.89788e+06	5.03581e+06	5.13113e+06	5.43411e+06	6.19074e+06	6.46378e+06	6.75948e+06	6.45429e+06	7.2624e+06	6.3237e+06	8.65533e+06	8.03013e+06	7.80167e+06	6.25818e+06	6.81593e+06	6.50698e+06	6.03512e+06	6.15905e+06
Chlorogenic acid	3.58	level1			353.086	145.8	NEG	2.32389e+07	5.89433e+07	4.66574e+07	2.5617e+07	4.29651e+07	2.72434e+07	7.12943e+07	1.18853e+08	5.89028e+07	7.71169e+07	8.599e+07	5.68377e+07	6.67187e+07	7.65864e+07	9.57466e+07	7.84506e+07	1.64297e+08	6.12242e+07	6.82518e+07	1.14307e+08	5.99934e+07	7.08349e+07	7.05627e+07	1.22007e+08	6.14583e+07	6.23961e+07	5.72328e+07	5.868e+07
Methylthiouracil	3.58	level1			143.033	15	POS	1.06276e+07	1.16503e+07	1.12482e+07	1.12764e+07	1.05401e+07	9.5519e+06	1.11168e+07	1.19408e+07	1.08172e+07	1.05678e+07	1.11436e+07	1.16514e+07	1.14119e+07	1.12081e+07	9.67142e+06	1.15995e+07	1.06808e+07	1.22914e+07	1.19461e+07	1.0328e+07	1.11209e+07	1.13461e+07	1.15983e+07	9.91923e+06	1.02489e+07	1.1437e+07	1.17631e+07	1.13697e+07
3'-O-Methylinosine	3.58	level1			281.087	26.7	NEG	2.83884e+07	3.25975e+07	3.06642e+07	2.29968e+07	3.52179e+07	3.54679e+07	2.6287e+07	2.26063e+07	2.99485e+07	3.32878e+07	3.20988e+07	2.80739e+07	2.70732e+07	2.13796e+07	3.01554e+07	3.10853e+07	3.01744e+07	3.20879e+07	3.03568e+07	4.87719e+07	4.43632e+07	2.58458e+07	2.35235e+07	3.41359e+07	2.76365e+07	2.80082e+07	2.80194e+07	3.02649e+07
Altretamine	3.58	level1			193.157	242.1	POS	3.17076e+07	3.05023e+07	2.96012e+07	3.19118e+07	3.57183e+07	3.27684e+07	2.86962e+07	3.12607e+07	3.11727e+07	2.74247e+07	2.45495e+07	2.73782e+07	2.57743e+07	2.40731e+07	2.90465e+07	2.57384e+07	2.36817e+07	2.77181e+07	2.49347e+07	2.40682e+07	2.28682e+07	1.79065e+07	2.42346e+07	3.05205e+07	2.6288e+07	2.77804e+07	2.76947e+07	3.1204e+07
6-Benzylaminopurine	3.58	level1			208.096	163.6	POS	1.22799e+07	1.34802e+07	1.3312e+07	1.30992e+07	1.13628e+07	1.31568e+07	1.29493e+07	1.61284e+07	1.21024e+07	1.59167e+07	1.20885e+07	1.54618e+07	8.41748e+06	8.85289e+06	7.56973e+06	6.95918e+06	9.6062e+06	1.08414e+07	1.08516e+07	1.04755e+07	9.44675e+06	1.46135e+07	1.52929e+07	1.89765e+07	1.22568e+07	1.15642e+07	1.21307e+07	1.1876e+07
Carnitine	3.58	level1			162.11	31.8	POS	1.60682e+08	1.85665e+08	2.36919e+08	2.1636e+08	2.56925e+08	3.17407e+08	2.23597e+08	2.29716e+08	1.84879e+08	1.71242e+08	1.99285e+08	1.81735e+08	1.99051e+08	1.99931e+08	3.81352e+08	1.98614e+08	2.55156e+08	1.97839e+08	2.09417e+08	2.10825e+08	1.93873e+08	2.03801e+08	2.0952e+08	1.82639e+08	1.97484e+08	2.69609e+08	1.91474e+08	1.68909e+08
4-Ethoxybenzoic acid	3.57	level1			165.055	160.5	NEG	3.0935e+08	2.94833e+08	2.56116e+08	2.87785e+08	2.58091e+08	3.39595e+08	2.40936e+08	2.73209e+08	2.37796e+08	3.05058e+08	2.29529e+08	2.66742e+08	2.01629e+08	1.90323e+08	2.2534e+08	2.0696e+08	2.14406e+08	2.62383e+08	2.73493e+08	2.56217e+08	3.06333e+08	2.35246e+08	2.27743e+08	1.90974e+08	2.54672e+08	2.49036e+08	2.5206e+08	2.51582e+08
Ligustilide	3.57	level1			191.106	198.5	POS	2.12147e+07	2.39836e+07	2.26353e+07	2.18215e+07	1.68951e+07	2.58718e+07	2.09046e+07	2.22124e+07	2.70209e+07	2.18678e+07	2.20715e+07	2.00142e+07	2.30765e+07	2.83853e+07	2.05497e+07	1.91305e+07	1.83072e+07	2.14645e+07	2.08085e+07	2.73136e+07	2.27105e+07	1.99061e+07	2.12214e+07	1.537e+07	2.1289e+07	2.13997e+07	1.74318e+07	2.44564e+07
Flavin mononucleotide (FMN)	3.57	level1			437.09	185.4	NEG	6.65955e+06	7.7185e+06	8.60007e+06	2.92333e+06	8.07966e+06	6.53789e+06	1.03585e+07	1.11075e+07	1.48202e+07	1.04693e+07	9.53883e+06	9.4949e+06	1.39338e+07	1.27027e+07	1.44756e+07	2.06448e+07	1.26392e+07	1.75142e+07	9.73866e+06	1.39826e+07	1.07801e+07	7.01557e+06	6.31973e+06	6.9873e+06	1.07777e+07	1.04539e+07	1.00948e+07	1.07466e+07
Pyroglutamic acid	3.57	level1			130.049	49	POS	7.05281e+08	2.70494e+08	3.04149e+08	4.08238e+08	2.56077e+08	2.52044e+08	2.93563e+08	3.44185e+08	2.65784e+08	2.5115e+08	3.49246e+08	2.46271e+08	2.84675e+08	1.05479e+08	1.2378e+08	1.77211e+08	2.06298e+08	2.79998e+08	6.7076e+07	0	3.3394e+08	2.50194e+08	4.69957e+08	3.95595e+08	2.14462e+08	3.72501e+08	2.16391e+08	1.59978e+08
5,7-Dihydroxychromone	3.56	level1			177.018	156.4	NEG	4.16423e+06	7.35789e+06	6.25736e+06	6.44727e+06	9.58528e+06	5.2699e+06	1.18581e+07	1.38122e+07	9.7445e+06	1.29651e+07	2.08494e+07	1.12006e+07	1.53264e+07	1.41051e+07	1.97343e+07	2.08884e+07	1.81441e+07	1.46035e+07	8.99269e+06	8.74659e+06	5.8794e+06	1.13131e+07	9.85751e+06	1.42462e+07	1.27776e+07	1.216e+07	1.1401e+07	1.1831e+07
Sulfaquinoxaline (sodium salt)	3.55	level1			299.055	221.7	NEG	1.33024e+07	1.57116e+07	1.21468e+07	1.93353e+07	1.52188e+07	1.35881e+07	2.00175e+07	1.88736e+07	1.76347e+07	1.41718e+07	1.62724e+07	2.04513e+07	1.07247e+07	1.40275e+07	1.67741e+07	1.83439e+07	1.17324e+07	1.21352e+07	9.97381e+06	1.04053e+07	1.11179e+07	1.0893e+07	1.13311e+07	1.18108e+07	1.40576e+07	1.48404e+07	1.45504e+07	1.45311e+07
Ibutilide (fumarate)	3.55	level1			383.242	221.3	NEG	2.96798e+07	3.11967e+07	3.48477e+07	3.18452e+07	5.37689e+07	3.26362e+07	4.12743e+07	4.86564e+07	4.02721e+07	3.96846e+07	3.46762e+07	3.92773e+07	1.93453e+07	2.04047e+07	2.31636e+07	1.79261e+07	1.49047e+07	1.23196e+07	1.37531e+07	1.55665e+07	1.43354e+07	1.35055e+07	1.83982e+07	1.89196e+07	2.8803e+07	2.84739e+07	2.7502e+07	2.87073e+07
IS1					176.068	192.7	NEG	2.42111e+07	2.37128e+07	2.32351e+07	2.50668e+07	2.20275e+07	2.13823e+07	2.43057e+07	2.33195e+07	2.29527e+07	2.38992e+07	2.31514e+07	2.55074e+07	2.51681e+07	2.46128e+07	2.35942e+07	2.41637e+07	2.25706e+07	2.31979e+07	2.34602e+07	2.38073e+07	2.22684e+07	2.2414e+07	2.31441e+07	2.41012e+07	2.26944e+07	2.19439e+07	2.33905e+07	2.32307e+07
1,3-Dimethyluric acid	3.54	level1			195.05	37.4	NEG	1.2671e+08	1.13274e+08	1.21115e+08	9.62451e+07	1.24789e+08	1.47686e+08	8.17626e+07	4.94011e+07	1.25257e+08	5.94032e+07	1.12922e+08	9.45311e+07	8.58639e+07	9.08921e+07	6.38782e+07	1.53392e+08	1.2948e+08	1.36783e+08	1.19312e+08	1.51697e+08	1.3673e+08	6.40891e+07	5.68046e+07	1.08619e+08	5.74753e+07	6.62493e+07	6.07714e+07	1.29291e+08
Melitracen (hydrochloride)	3.54	level1			292.208	174.7	POS	1.31831e+08	1.31118e+08	8.94133e+07	1.0709e+08	2.77821e+08	1.26049e+08	9.84541e+07	1.1901e+08	1.3311e+08	1.58006e+08	1.39496e+08	9.52512e+07	1.12926e+08	1.75723e+08	1.87904e+08	2.58496e+08	2.11992e+08	2.37389e+08	2.62392e+08	3.23096e+08	4.2912e+08	2.19928e+08	2.25826e+08	1.41955e+08	1.76423e+08	1.76642e+08	1.80632e+08	1.76749e+08
1,7-Dimethyluric acid	3.53	level1			195.05	37.4	NEG	1.2671e+08	1.13274e+08	1.21115e+08	9.62451e+07	1.24789e+08	1.47686e+08	8.17626e+07	4.94011e+07	1.25257e+08	5.94032e+07	1.12922e+08	9.45311e+07	8.58639e+07	9.08921e+07	6.38782e+07	1.53392e+08	1.2948e+08	1.36783e+08	1.19312e+08	1.51697e+08	1.3673e+08	6.40891e+07	5.68046e+07	1.08619e+08	5.74753e+07	6.62493e+07	6.07714e+07	1.29291e+08
Myristoylcarnitine	3.53	level1			372.308	302.9	POS	5.13645e+06	7.00341e+06	5.18926e+06	837795	5.15213e+06	5.43122e+06	1.90003e+06	3.57742e+06	5.96008e+06	2.17802e+06	5.53065e+06	4.44465e+06	9.02312e+06	1.08192e+07	5.22697e+06	1.41097e+07	5.94824e+06	1.34953e+07	7.09289e+06	7.11311e+06	7.89399e+06	1.62202e+07	9.5312e+06	6.07835e+06	5.0242e+06	9.41238e+06	5.92688e+06	6.93652e+06
Norfloxacin	3.53	level1			320.137	198.5	POS	5.1345e+07	2.31241e+07	1.89748e+07	1.83011e+07	2.37817e+07	3.0695e+07	4.69573e+07	1.12804e+08	4.39726e+07	6.2465e+07	3.47455e+07	3.082e+07	3.88185e+07	3.54559e+07	3.81328e+07	2.89388e+07	5.60946e+07	4.26343e+07	2.85706e+07	1.89417e+07	2.10175e+07	7.0068e+07	5.36601e+07	1.54184e+07	4.74802e+07	3.1556e+07	3.06216e+07	3.24903e+07
PF-573228	3.53	level1			492.137	154.3	POS	3.55709e+06	3.8398e+06	3.21186e+06	2.52022e+06	5.13607e+06	5.3326e+06	5.04945e+06	4.96689e+06	4.59242e+06	6.12501e+06	3.96901e+06	2.90306e+06	2.34607e+06	3.41842e+06	4.71437e+06	4.99249e+06	4.51566e+06	3.21709e+06	5.14723e+06	4.00911e+06	4.59625e+06	6.3758e+06	5.44566e+06	4.97089e+06	3.53218e+06	3.96491e+06	4.47581e+06	5.85363e+06
Biotin	3.53	level1			227.081	152.3	POS	1.03258e+07	1.47191e+07	1.66219e+07	1.34687e+07	1.33443e+07	1.38284e+07	1.14379e+07	1.05868e+07	2.90091e+07	2.26535e+07	1.51974e+07	1.49774e+07	9.68885e+06	8.47662e+06	6.65163e+06	6.97261e+06	6.73381e+06	6.31946e+06	9.2126e+06	1.277e+07	1.17817e+07	2.1975e+06	6.23814e+06	7.15432e+06	1.2329e+07	1.19384e+07	1.28197e+06	1.06585e+06
Droloxifene	3.52	level1			386.217	253	NEG	271223	383340	282264	436711	1.05355e+06	443515	508736	1.44093e+06	560282	664938	394879	123921	178181	527874	476748	309191	180905	579134	162990	208980	78468.5	304519	207274	271234	269593	495598	548190	470594
Dansylcadaverine	3.52	level1			334.164	212.3	NEG	4.06252e+07	5.22169e+07	3.91329e+07	4.44873e+07	3.51805e+07	4.18835e+07	6.3274e+07	7.73649e+07	5.40886e+07	7.28981e+07	5.58673e+07	4.25565e+07	2.85811e+07	2.28408e+07	3.49273e+07	1.70759e+07	2.78644e+07	3.56912e+07	2.65305e+07	1.80941e+07	2.2215e+07	7.03139e+07	5.67004e+07	5.65221e+07	4.28646e+07	4.24415e+07	4.23952e+07	4.26897e+07
Tyrphostin AG1296	3.5	level1			267.119	198.3	POS	5.12479e+07	5.14271e+07	5.34389e+07	4.74556e+07	4.7885e+07	5.84438e+07	5.23211e+07	4.76736e+07	6.14097e+07	5.74642e+07	6.1354e+07	5.47089e+07	6.39523e+07	7.4029e+07	6.6695e+07	6.12645e+07	5.82069e+07	5.81638e+07	5.80995e+07	5.62529e+07	6.26014e+07	5.26146e+07	4.85393e+07	4.6088e+07	5.60098e+07	5.80441e+07	5.56314e+07	5.6562e+07
SB 204741	3.5	level1			267.065	172.4	NEG	6.13124e+06	4.81884e+06	4.49191e+06	4.81878e+06	3.94357e+06	5.40637e+06	1.09511e+07	2.78645e+07	9.29115e+06	1.67617e+07	1.19806e+07	7.32678e+06	1.20401e+07	2.52085e+07	5.63891e+06	9.47162e+06	1.43543e+07	1.54752e+07	4.41667e+06	4.8307e+06	5.52086e+06	1.16716e+07	1.11098e+07	5.41075e+06	1.08992e+07	9.6956e+06	9.39155e+06	9.91781e+06
2'-O-methylcytidine	3.5	level1			258.104	55	POS	1.30704e+06	1.77616e+06	1.80183e+06	1.88763e+06	4.58306e+06	1.98376e+06	1.35776e+06	1.07991e+06	1.97311e+06	2.58944e+06	5.06409e+06	1.67431e+06	1.15954e+06	921382	1.00146e+06	691998	3.33017e+06	1.37836e+06	1.23929e+06	922891	1.47818e+06	1.19749e+06	1.55346e+06	827535	1.25553e+06	1.43994e+06	1.48135e+06	948801
3'-O-methylcytidine	3.5	level1			258.104	55	POS	1.30704e+06	1.77616e+06	1.80183e+06	1.88763e+06	4.58306e+06	1.98376e+06	1.35776e+06	1.07991e+06	1.97311e+06	2.58944e+06	5.06409e+06	1.67431e+06	1.15954e+06	921382	1.00146e+06	691998	3.33017e+06	1.37836e+06	1.23929e+06	922891	1.47818e+06	1.19749e+06	1.55346e+06	827535	1.25553e+06	1.43994e+06	1.48135e+06	948801
5-Methylcytidine	3.5	level1			258.104	55	POS	1.30704e+06	1.77616e+06	1.80183e+06	1.88763e+06	4.58306e+06	1.98376e+06	1.35776e+06	1.07991e+06	1.97311e+06	2.58944e+06	5.06409e+06	1.67431e+06	1.15954e+06	921382	1.00146e+06	691998	3.33017e+06	1.37836e+06	1.23929e+06	922891	1.47818e+06	1.19749e+06	1.55346e+06	827535	1.25553e+06	1.43994e+06	1.48135e+06	948801
3-methylcytidine	3.5	level1			258.104	55	POS	1.30704e+06	1.77616e+06	1.80183e+06	1.88763e+06	4.58306e+06	1.98376e+06	1.35776e+06	1.07991e+06	1.97311e+06	2.58944e+06	5.06409e+06	1.67431e+06	1.15954e+06	921382	1.00146e+06	691998	3.33017e+06	1.37836e+06	1.23929e+06	922891	1.47818e+06	1.19749e+06	1.55346e+06	827535	1.25553e+06	1.43994e+06	1.48135e+06	948801
Aurantiamide acetate	3.49	level1			443.191	196	NEG	6.55469e+07	6.83192e+07	6.22443e+07	5.36176e+07	6.46556e+07	7.26563e+07	5.6801e+07	5.01174e+07	6.93554e+07	6.39059e+07	6.38857e+07	5.12963e+07	5.144e+07	4.87869e+07	4.93814e+07	4.9945e+07	5.09829e+07	4.01614e+07	5.44494e+07	5.83047e+07	5.3088e+07	4.11674e+07	4.50232e+07	4.86963e+07	5.433e+07	5.65918e+07	5.65649e+07	5.56688e+07
PC(P-16:0/0:0)	3.48	level1			480.352	255.4	POS	3.01276e+06	3.39442e+06	3.61168e+06	2.81324e+06	3.84361e+06	2.9619e+06	3.74564e+06	3.73807e+06	4.74836e+06	4.48017e+06	3.658e+06	3.66467e+06	2.30961e+06	3.3977e+06	4.30394e+06	2.90763e+06	2.23532e+06	2.90635e+06	2.14139e+06	5.05294e+06	3.02192e+06	2.38136e+06	3.48621e+06	3.91297e+06	3.57227e+06	3.6192e+06	3.35752e+06	3.27559e+06
gamma-Glutamylglutamine	3.47	level1			258.104	55	POS	1.30704e+06	1.77616e+06	1.80183e+06	1.88763e+06	4.58306e+06	1.98376e+06	1.35776e+06	1.07991e+06	1.97311e+06	2.58944e+06	5.06409e+06	1.67431e+06	1.15954e+06	921382	1.00146e+06	691998	3.33017e+06	1.37836e+06	1.23929e+06	922891	1.47818e+06	1.19749e+06	1.55346e+06	827535	1.25553e+06	1.43994e+06	1.48135e+06	948801
Manzamine A (hydrochloride)	3.47	level1			531.341	205.8	POS	6.14976e+06	5.20384e+06	8.86527e+06	6.70151e+06	5.99143e+06	5.98327e+06	6.75859e+06	6.63233e+06	6.47475e+06	5.63937e+06	5.87014e+06	6.07399e+06	5.66393e+06	6.96211e+06	8.03781e+06	6.95421e+06	5.80028e+06	6.6632e+06	5.57616e+06	5.59271e+06	5.8658e+06	7.55892e+06	4.58623e+06	6.1017e+06	6.72955e+06	5.92783e+06	1.19931e+06	6.27689e+06
N-(omega)-Hydroxyarginine	3.43	level1			191.117	54.4	POS	3.53101e+08	3.63646e+08	2.72661e+08	1.92727e+08	3.41583e+08	3.37375e+08	4.49258e+08	6.46372e+08	2.53765e+08	3.0049e+08	3.96513e+08	3.04567e+08	7.77618e+08	9.02095e+08	9.85063e+08	9.5744e+08	9.47819e+08	1.37143e+09	5.77679e+08	8.30845e+08	6.58176e+08	1.02698e+09	8.2825e+08	5.29899e+08	5.13997e+08	5.39194e+08	7.39848e+08	6.54905e+08
Dinaciclib	2.75	level2			395.22	307.5	NEG	749851	901141	770640	884448	1.34547e+06	875631	1.34231e+06	1.31156e+06	1.2045e+06	1.99427e+06	1.1679e+06	1.3109e+06	438009	430383	423641	394530	743283	397346	1.11069e+06	698961	861275	1.91531e+06	1.52288e+06	1.53847e+06	1.07062e+06	1.16874e+06	963510	984729
Benzyl 6-nitro-1H-benzimidazol-2-yl sulfide	2.75	level2			286.064	134.4	POS	5.37612e+06	7.67002e+06	4.06162e+06	7.17215e+06	4.85407e+06	8.3391e+06	4.05655e+06	9.63885e+06	3.55679e+06	6.29747e+06	3.2834e+06	991994	3.5292e+06	3.59176e+06	4.56194e+06	4.23751e+06	5.78607e+06	7.83194e+06	1.85099e+06	3.15818e+06	4.67795e+06	9.14202e+06	6.42665e+06	4.76604e+06	4.22115e+06	1.49153e+06	4.37326e+06	3.2925e+06
7-Methoxy-6-(1,2,3-trihydroxy-3-methylbutyl)chromen-2-one	2.74	level2			295.118	138.4	POS	7.24936e+06	9.57075e+06	2.73835e+06	9.4644e+06	9.65123e+06	9.27748e+06	6.05385e+06	2.40514e+07	7.43711e+06	8.59578e+06	7.97691e+06	6.70733e+06	8.22813e+06	1.00125e+07	1.71005e+07	1.20747e+07	1.22331e+07	3.19852e+07	7.54509e+06	8.43229e+06	1.43194e+07	2.57776e+07	2.31457e+07	1.22928e+07	1.10068e+07	1.05097e+07	1.08416e+07	1.10734e+07
9-Oxo-9H-indeno[1,2-b]pyrazine-2,3-dicarbonitrile	2.74	level2			233.046	4.4	POS	4.25035e+07	3.75022e+07	4.80141e+07	4.05111e+07	4.37772e+07	4.34732e+07	3.35171e+07	4.93312e+07	4.31181e+07	4.46982e+07	4.11183e+07	3.98436e+07	5.09855e+07	4.20098e+07	4.55926e+07	4.19103e+07	3.54942e+07	3.72285e+07	4.05933e+07	3.4728e+07	7.93733e+07	4.66834e+07	3.73557e+07	4.31376e+07	3.95411e+07	3.92592e+07	7.58159e+07	4.65657e+07
3-[(Cholamidopropyl)dimethylammonio]-1-propanesulfonate	2.73	level2			613.389	278.4	NEG	914296	519340	823978	950001	899261	1.5367e+06	3.91679e+06	7.74892e+07	1.20841e+06	5.5318e+06	836426	1.13034e+08	561018	80840.5	531265	1.00116e+06	505182	432908	2.29251e+06	6.08993e+06	874829	391085	655225	845175	8.1467e+06	8.1809e+06	8.34634e+06	7.93888e+06
Valrubicin	2.73	level2			722.206	211.8	NEG	1.84931e+06	1.61309e+06	1.24902e+06	1.60529e+06	2.12299e+06	1.26379e+06	1.85954e+06	1.38246e+06	1.19135e+06	1.8408e+06	1.82839e+06	1.77126e+06	801402	611431	1.31063e+06	1.3108e+06	1.51862e+06	760287	1.57909e+06	2.04231e+06	1.59524e+06	1.71809e+06	1.43966e+06	1.89473e+06	1.75752e+06	1.65967e+06	1.51549e+06	1.59306e+06
1-(4-Hydroxy-3,5-dimethoxyphenyl)-7-(4-hydroxy-3-methoxyphenyl)-3,5-heptanediol	2.73	level2			407.206	163.9	POS	1.86208e+07	2.46879e+07	1.92399e+07	1.53404e+07	2.44029e+07	1.85156e+07	2.43644e+07	3.1115e+07	2.52732e+07	2.37379e+07	2.65328e+07	1.70282e+07	4.24801e+07	4.04215e+07	6.41204e+07	5.43736e+07	5.11506e+07	6.08869e+07	4.39025e+07	3.72204e+07	4.3398e+07	5.04094e+07	4.32134e+07	4.07016e+07	3.40576e+07	3.40007e+07	3.35994e+07	3.54e+07
4-(4-Fluorophenyl)-N-phenyl-1,3-thiazol-2-amine	2.73	level2			271.07	151.9	POS	2.2604e+07	2.54895e+07	2.23155e+07	2.34285e+07	2.81432e+07	2.47001e+07	2.35761e+07	2.26584e+07	2.50348e+07	1.93838e+07	1.91867e+07	1.74411e+07	3.5599e+07	3.7504e+07	4.72833e+07	4.31484e+07	4.21898e+07	4.88137e+07	5.02887e+07	4.35636e+07	5.37621e+07	5.62628e+07	5.35828e+07	5.46983e+07	3.59135e+07	3.56836e+07	3.6467e+07	3.66283e+07
Octaethylene glycol	2.73	level2			393.209	149.4	POS	1.22008e+06	1.15442e+06	1.58778e+06	1.06401e+06	987095	1.24681e+06	1.56692e+06	1.11963e+06	1.6188e+06	1.4156e+06	1.47284e+06	1.21711e+06	2.27682e+06	3.02422e+06	4.36058e+06	2.61941e+06	2.72881e+06	2.20726e+06	3.75742e+06	1.36435e+06	1.34146e+06	2.55243e+06	1.6638e+06	2.8502e+06	1.37884e+06	1.42694e+06	1.40566e+06	1.5161e+06
N-(4-Ethylphenyl)-4-fluorobenzenesulfonamide	2.73	level2			278.065	144.6	NEG	1.85075e+07	2.18633e+07	2.61512e+07	3.27815e+07	1.76055e+07	2.03524e+07	9.79673e+06	8.80492e+06	1.1395e+07	1.81802e+07	2.27229e+07	1.06012e+07	4.66937e+06	803526	2.80358e+06	1.33454e+06	2.48856e+06	2.42034e+06	1.50772e+06	1.48769e+06	1.30523e+06	1.21821e+06	1.77439e+06	721723	1.10477e+07	1.27355e+07	1.0043e+07	1.13447e+07
3-Chloro-N-(4-nitrophenyl)propanamide	2.73	level2			229.037	5.6	POS	2.37367e+06	2.1288e+06	1.896e+06	2.01763e+06	2.443e+06	2.01782e+06	1.928e+06	3.67454e+06	2.12998e+06	1.96613e+06	1.74173e+06	2.55605e+06	2.03443e+06	2.226e+06	2.07978e+06	2.07419e+06	1.99908e+06	1.73282e+06	2.38212e+06	2.72995e+06	1.95446e+06	2.01324e+06	1.9208e+06	2.02609e+06	2.68311e+06	2.89143e+06	1.70671e+06	2.0698e+06
Androsterone_sulfate	2.72	level2			371.189	289.9	POS	1.72115e+06	1.00373e+06	1.28015e+06	951962	1.97234e+06	1.64579e+06	8.41575e+06	4.79862e+07	3.99466e+06	1.54361e+07	2.10081e+07	8.2785e+06	2.16344e+07	1.93868e+07	1.37877e+07	1.77157e+07	2.14999e+07	2.23787e+07	4.69753e+06	1.30354e+06	2.57693e+06	1.59371e+07	7.11402e+06	5.74785e+06	9.52769e+06	1.01623e+07	1.03181e+07	9.30638e+06
2,8,9-Trimethyl-2,5,8,9-tetraaza-1-phosphabicyclo[3.3.3]undecane	2.72	level2			217.157	262.6	POS	1.07303e+07	1.23693e+07	1.30656e+07	1.08539e+07	1.32957e+07	1.29761e+07	1.66177e+07	1.63533e+07	3.02184e+07	2.01658e+07	1.82651e+07	1.58586e+07	1.30448e+07	1.0444e+07	1.4492e+07	1.00434e+07	9.77457e+06	9.99643e+06	1.22362e+07	9.86107e+06	1.00785e+07	9.87179e+06	9.63943e+06	9.32676e+06	1.12916e+07	1.19277e+07	1.86944e+07	1.19284e+07
Mupirocin	2.72	level2			499.291	252.1	NEG	3.9549e+06	3.35462e+06	5.12888e+06	5.12181e+06	2.87065e+06	4.42853e+06	3.98982e+06	1.63059e+06	4.35255e+06	1.97588e+06	6.55939e+06	1.37579e+06	3.26834e+06	2.54926e+06	3.74653e+06	4.51485e+06	6.37753e+06	2.6711e+06	4.79303e+06	7.27513e+06	5.30463e+06	5.22781e+06	6.43675e+06	4.95728e+06	3.32263e+06	3.19749e+06	3.42944e+06	3.18024e+06
9S,15S-Dihydroxy-5Z,13E-prostadienoic acid	2.72	level2			337.238	245.4	NEG	1.19537e+08	6.6123e+07	6.86358e+07	6.93163e+07	8.93997e+07	6.7193e+07	9.29212e+07	1.18109e+08	1.45076e+08	1.09829e+08	9.5674e+07	9.77799e+07	6.86879e+07	1.27219e+08	9.66517e+07	7.379e+07	6.04091e+07	1.30959e+08	1.12823e+08	8.79337e+07	8.02289e+07	8.34842e+07	9.15434e+07	1.50421e+08	8.3574e+07	8.329e+07	8.43446e+07	8.59647e+07
5-(3-Chlorophenyl)-5-methylimidazolidine-2,4-dione	2.72	level2			223.028	239.5	NEG	2.87663e+06	3.17588e+06	3.26875e+06	3.56128e+06	3.14296e+06	3.82141e+06	3.70739e+06	3.21926e+06	3.65037e+06	2.62907e+06	2.79093e+06	3.5639e+06	3.41108e+06	3.37881e+06	4.2749e+06	3.99753e+06	3.28611e+06	3.22682e+06	3.19267e+06	3.46326e+06	3.73904e+06	3.40498e+06	4.05967e+06	3.61942e+06	5.14537e+07	4.1059e+07	4.16963e+07	4.99513e+07
8,9-DHET	2.72	level2			337.238	223.6	NEG	3.19382e+07	2.73524e+07	3.59789e+07	2.68393e+07	3.49057e+07	2.86589e+07	2.3832e+07	1.99196e+07	2.38684e+07	1.99368e+07	1.66875e+07	2.14091e+07	2.62825e+07	3.35624e+07	2.8295e+07	4.12361e+07	2.25337e+07	2.77873e+07	1.86196e+07	1.9472e+07	2.02618e+07	1.75225e+07	1.87777e+07	2.142e+07	2.45696e+07	2.36842e+07	2.22375e+07	2.43956e+07
3',4',5,7-Tetrahydroxy-3-methoxyflavone	2.72	level2			315.05	210.1	NEG	2.58514e+07	2.9425e+07	2.05934e+07	3.65249e+07	3.53656e+07	2.43573e+07	3.92086e+07	4.418e+07	3.48691e+07	3.25588e+07	3.21861e+07	1.87211e+07	1.83109e+07	2.75459e+07	3.8054e+07	4.10309e+07	1.99117e+07	2.90168e+07	1.71903e+07	1.77436e+07	1.97767e+07	2.6251e+07	3.2019e+07	2.4417e+07	2.7404e+07	2.89753e+07	2.91096e+07	2.87265e+07
Lowinox TBM-6	2.72	level2			357.19	206.5	NEG	1.61259e+07	1.96351e+07	1.59677e+07	2.28985e+07	1.58709e+07	1.89147e+07	1.50515e+07	9.68076e+06	1.56982e+07	1.53505e+07	1.42666e+07	1.95677e+07	2.18793e+07	3.4606e+07	2.91923e+07	3.3865e+07	2.13977e+07	2.59202e+07	1.68514e+07	2.08047e+07	1.73409e+07	1.8016e+07	1.62118e+07	2.15894e+07	2.26894e+07	2.43722e+07	1.92877e+07	1.85378e+07
Prodiamine	2.72	level2			349.112	141	NEG	6.49265e+07	9.32502e+07	7.30558e+07	7.72561e+07	5.89439e+07	6.96349e+07	3.94749e+07	6.33453e+07	6.1612e+07	4.20396e+07	4.81245e+07	3.18182e+07	3.83349e+07	4.63611e+07	5.60947e+07	7.01765e+07	5.77855e+07	6.21572e+07	7.01712e+07	7.19803e+07	8.4209e+07	8.13022e+07	7.85611e+07	5.3165e+07	5.09315e+07	4.97439e+07	5.22299e+07	5.16297e+07
Nafcillin	2.72	level2			413.118	40	NEG	898735	1.0285e+06	1.01688e+06	987104	1.11929e+06	672866	1.80901e+06	871557	929219	912308	609470	1.35472e+06	522343	633141	341320	846085	856087	894066	1.29409e+06	957145	891789	1.99648e+06	1.56706e+06	3.2302e+06	689240	876238	950898	1.52945e+06
alpha-Hydroxyhippuric acid	2.72	level2			194.045	39.3	NEG	1.47501e+07	2.1778e+07	2.45341e+07	1.73021e+07	3.04909e+07	1.77028e+07	2.79896e+07	1.32917e+07	2.26053e+07	3.05192e+07	2.38122e+07	2.50875e+07	2.44303e+07	2.51065e+07	2.23107e+07	2.56734e+07	2.77973e+07	1.88476e+07	2.71115e+07	3.42418e+07	2.75345e+07	1.80784e+07	1.71417e+07	2.6099e+07	1.74427e+07	1.92295e+07	1.95845e+07	2.24111e+07
N-(tert-Butyl)-4-fluorobenzenesulfonamide	2.72	level2			230.066	28	NEG	1.98845e+07	2.13362e+07	2.55938e+07	2.41123e+07	1.65266e+07	1.65356e+07	1.36525e+07	9.73608e+06	2.25071e+07	1.94427e+07	1.37966e+07	2.10966e+07	1.16169e+07	1.13711e+07	5.87816e+06	1.87265e+07	1.18991e+07	9.08303e+06	5.86282e+06	9.14313e+06	1.11846e+07	2.44654e+06	5.57923e+06	9.1914e+06	1.15407e+07	9.99072e+06	1.19725e+07	1.19892e+07
4-Chloro-N-ethylbenzenesulfonamide	2.72	level2			218.005	5.6	NEG	1.25401e+06	0	1.36193e+06	1.1179e+06	0	1.19724e+06	990461	1.84259e+06	1.17425e+06	1.11834e+06	1.31291e+06	0	936842	1.4273e+06	1.01027e+06	1.31853e+06	0	1.10191e+06	1.93141e+06	1.07712e+06	1.22297e+06	1.91749e+06	865933	1.20328e+06	1.31686e+06	1.21531e+06	1.11115e+06	1.22028e+06
5-(5-Methoxycarbonyl-5,8a-dimethyl-2-methylidene-3,4,4a,6,7,8-hexahydro-1H-naphthalen-1-yl)-3-methylpentanoic acid	2.71	level2			349.239	327.4	NEG	228998	236538	635992	269239	200566	372359	336943	237662	658387	379305	521970	272437	477317	832184	1.68577e+06	671956	322208	565789	655111	1.02074e+06	1.33209e+06	8.49775e+06	4.31713e+06	536796	1.08518e+06	394345	1.43825e+06	1.38124e+06
7-alpha-hydroxy-4-cholesten-3-one	2.71	level2			423.324	290.4	POS	1.36688e+06	3.47772e+06	1.80227e+06	2.94003e+06	1.24157e+06	2.0924e+06	1.57905e+06	1.58678e+06	4.58258e+06	2.49605e+06	2.22943e+06	1.62007e+06	6.81913e+06	4.87408e+06	5.54338e+06	7.06658e+06	4.96806e+06	7.17209e+06	7.42841e+06	7.03788e+06	6.40092e+06	2.53291e+06	4.07244e+06	6.87266e+06	4.69029e+06	4.86629e+06	3.59312e+06	4.67719e+06
FA 18:2+2O	2.71	level2			311.221	260.9	NEG	1.88623e+08	2.0278e+08	1.72759e+08	2.04717e+08	2.11397e+08	2.0141e+08	1.97735e+08	2.00816e+08	1.76041e+08	1.63452e+08	1.63196e+08	1.23926e+08	1.65799e+08	2.16962e+08	1.06971e+08	1.95128e+08	1.7178e+08	9.29441e+07	1.33163e+08	1.83557e+08	1.60428e+08	2.13894e+08	1.32265e+08	1.62565e+08	2.30017e+08	2.00011e+08	1.88044e+08	1.92186e+08
Cortisone_acetate	2.71	level2			401.198	239.5	NEG	2.09814e+07	2.24729e+07	2.23017e+07	1.93137e+07	2.08289e+07	2.23443e+07	3.95929e+07	7.29425e+07	3.72874e+07	5.64095e+07	6.33964e+07	3.56881e+07	3.35309e+07	5.47461e+07	5.33669e+07	6.03184e+07	6.18271e+07	4.65476e+07	4.18584e+07	3.99361e+07	5.34888e+07	4.83885e+07	5.56451e+07	5.49464e+07	4.11297e+07	3.77112e+07	3.37609e+07	4.15059e+07
2-(2,6-Dimethyl-4-morpholinyl)-6-(3-methyl-1-piperidinyl)-5-nitro-4-pyrimidinamine	2.71	level2			351.214	223.7	POS	4.55467e+07	4.43658e+07	4.56978e+07	5.03781e+07	5.42265e+07	4.36112e+07	4.59778e+07	4.8522e+07	4.58091e+07	4.33879e+07	4.16593e+07	1.57932e+08	4.30183e+07	4.3713e+07	5.13486e+07	4.08266e+07	3.467e+07	4.59767e+07	3.16467e+07	3.40605e+07	4.61937e+07	3.75266e+07	3.43023e+07	4.27942e+07	4.21251e+07	4.28747e+07	4.10819e+07	4.49379e+07
Gallocatechin	2.71	level2			307.081	212.4	POS	1.29643e+07	9.66348e+06	9.5783e+06	1.18493e+07	5.00233e+06	1.14648e+07	8.93748e+06	1.29766e+07	1.16834e+07	1.44429e+07	7.79539e+06	1.14485e+07	6.39329e+06	6.29067e+06	2.74153e+06	4.61009e+06	3.76119e+06	8.42354e+06	7.27902e+06	6.68344e+06	5.40009e+06	5.03717e+06	5.06265e+06	6.03929e+06	7.88289e+06	9.35136e+06	7.90578e+06	8.38743e+06
4-Deoxycohumulone	2.71	level2			333.206	198.5	POS	7.70755e+07	4.71234e+07	1.30452e+08	1.73495e+08	1.5403e+08	6.13096e+07	1.00018e+08	8.49193e+07	1.53324e+08	1.19985e+08	1.09622e+08	1.57493e+08	1.07725e+08	1.53717e+08	1.10476e+08	3.25984e+08	1.24855e+08	2.92412e+08	7.76792e+07	2.35215e+08	1.7836e+08	1.36996e+08	1.03464e+08	5.53103e+07	7.69259e+07	9.30551e+07	7.63528e+07	8.81674e+07
Triacetyl resveratrol	2.71	level2			353.102	194	NEG	5.04209e+06	5.16239e+06	9.30544e+06	6.63043e+06	8.05543e+06	6.05575e+06	1.47729e+07	1.02702e+07	1.29202e+07	1.23258e+07	1.07092e+07	1.34352e+07	8.14012e+06	1.19015e+07	8.47622e+06	7.75291e+06	7.0376e+06	8.01826e+06	8.3167e+06	8.27989e+06	6.65555e+06	8.82078e+06	8.38949e+06	1.17629e+07	1.04343e+07	7.95883e+06	9.25328e+06	8.83604e+06
(+)-Blebbistatin	2.71	level2			293.128	180	POS	1.48929e+07	1.52524e+07	1.47907e+07	1.39546e+07	8.54998e+06	1.47702e+07	1.09415e+07	1.42973e+07	1.70361e+07	1.55386e+07	1.23831e+07	1.17714e+07	8.41583e+06	8.80926e+06	5.76193e+06	6.0385e+06	9.35238e+06	1.0275e+07	8.82722e+06	1.11518e+07	1.34758e+07	1.01339e+07	5.7893e+06	5.24456e+06	9.11651e+06	9.6617e+06	9.28596e+06	1.01497e+07
Nicardipine	2.71	level2			478.199	174.3	NEG	1.40891e+07	1.59362e+07	1.29643e+07	8.42361e+06	1.337e+07	1.44648e+07	1.62645e+07	1.01517e+07	2.7699e+07	2.13197e+07	1.54013e+07	1.65523e+07	1.559e+07	1.21626e+07	9.83355e+06	8.46051e+06	1.13263e+07	8.87544e+06	1.01807e+07	1.1583e+07	9.02214e+06	9.08942e+06	8.20703e+06	9.38724e+06	1.23742e+07	1.25026e+07	1.40033e+07	1.15573e+07
neoeriocitrin	2.71	level2			595.167	26	NEG	2.21127e+06	3.39154e+06	4.11449e+06	2.0004e+06	3.4594e+06	3.13455e+06	3.52977e+06	3.11469e+06	5.19637e+06	3.9897e+06	6.56554e+06	3.58915e+06	3.21472e+06	2.52286e+06	2.82706e+06	3.1803e+06	3.22855e+06	3.19429e+06	1.35111e+06	1.02643e+06	1.01412e+06	1.50983e+06	774146	1.64759e+06	2.49784e+06	2.55943e+06	2.34899e+06	2.87343e+06
5-(4-Aminophenyl)-4-phenyl-2,4-dihydro-3H-1,2,4-triazole-3-thione	2.71	level2			267.071	22.7	NEG	5.62695e+07	5.72833e+07	8.21834e+07	4.70667e+07	5.92092e+07	9.37473e+07	5.06622e+07	4.42889e+07	6.06637e+07	5.65662e+07	5.66149e+07	5.57502e+07	5.77391e+07	5.24462e+07	7.30123e+07	7.3807e+07	6.92965e+07	5.98966e+07	7.0994e+07	1.25458e+08	9.31694e+07	5.96057e+07	5.8411e+07	5.93615e+07	5.78367e+07	5.73547e+07	6.12443e+07	6.06311e+07
Soyacerebroside II	2.7	level2			714.549	326.1	POS	4.85894e+07	5.42208e+07	6.20476e+07	5.34627e+07	5.12094e+07	4.35546e+07	5.25143e+07	4.63079e+07	0	5.50916e+07	6.72466e+07	4.93249e+07	5.17262e+07	0	3.87747e+07	5.17457e+07	5.09509e+07	5.66823e+07	5.15372e+07	4.86094e+07	5.66762e+07	4.2446e+07	5.30604e+07	5.47044e+07	4.96e+07	5.35908e+07	4.68549e+07	5.83381e+07
Dodecylbenzenesulfonic acid	2.7	level2			325.183	302.2	NEG	3.68354e+08	2.53774e+08	1.6541e+08	1.1981e+08	1.54145e+08	1.44101e+08	2.5904e+08	2.05646e+08	2.15262e+08	1.6108e+08	2.52488e+08	1.92849e+08	1.56572e+08	1.23886e+08	1.49233e+08	1.36882e+08	1.82102e+08	9.78739e+07	1.11288e+08	9.15565e+07	1.20855e+08	1.37623e+08	8.72163e+07	1.35759e+08	2.51433e+08	2.52057e+08	2.50924e+08	2.65648e+08
FA 18:3+2O	2.7	level2			309.206	266.5	NEG	1.2132e+08	1.38254e+08	1.21323e+08	6.94416e+07	1.28188e+08	1.21585e+08	1.34639e+08	9.11373e+07	8.73858e+07	7.97069e+07	1.25256e+08	7.42048e+07	9.93761e+07	6.87053e+07	9.71671e+07	9.43608e+07	1.01622e+08	7.63735e+07	1.3997e+08	1.31451e+08	8.109e+07	6.37828e+07	1.1526e+07	5.43023e+07	5.89267e+07	1.2233e+08	1.14742e+08	1.28308e+08
2-Oxiraneoctanoic acid, .eta.-hydroxy-3-octyl-	2.7	level2			313.238	262.6	NEG	3.45143e+07	3.86534e+07	4.40881e+07	4.12881e+07	3.28047e+07	3.50749e+07	4.72836e+07	5.52157e+07	3.21799e+07	4.33439e+07	3.18987e+07	5.49791e+07	3.77648e+07	4.20889e+07	5.27664e+07	4.31288e+07	4.31985e+07	3.78884e+07	5.84737e+07	6.5459e+07	4.64225e+07	5.66166e+07	5.34754e+07	5.73478e+07	4.34046e+07	4.76222e+07	4.26985e+07	5.12617e+07
5-Oxo-ETE	2.7	level2			317.211	262.6	NEG	1.25802e+07	1.33946e+07	1.96187e+07	2.37774e+07	1.88819e+07	1.3392e+07	1.83534e+07	1.5688e+07	1.42631e+07	1.72714e+07	1.24383e+07	2.06687e+07	1.75432e+07	1.87798e+07	2.17482e+07	2.17668e+07	1.4537e+07	2.10656e+07	1.41644e+07	1.76107e+07	1.03165e+07	1.46295e+07	1.43367e+07	2.11209e+07	1.55658e+07	1.88657e+07	1.56354e+07	1.57086e+07
11-dehydro_TXB2	2.7	level2			367.211	260.1	NEG	1.65871e+07	1.76298e+07	1.70409e+07	1.83561e+07	1.75769e+07	1.6765e+07	2.16736e+07	2.57878e+07	1.89882e+07	2.1986e+07	1.80973e+07	2.28885e+07	1.96418e+07	2.36751e+07	2.94384e+07	2.41666e+07	1.76859e+07	2.42596e+07	1.79561e+07	1.96408e+07	1.42475e+07	1.9372e+07	1.82237e+07	2.77606e+07	1.94965e+07	1.8666e+07	2.02197e+07	1.96743e+07
9,10-DiHOME	2.7	level2			337.236	230.2	POS	1.25068e+08	1.35544e+08	1.50602e+08	1.4215e+08	1.85137e+08	1.33989e+08	1.6057e+08	1.81522e+08	1.85439e+08	1.5759e+08	1.51313e+08	1.51042e+08	1.29147e+08	5.96476e+08	1.4739e+08	1.19121e+08	4.85077e+08	5.67614e+08	9.27501e+07	1.06465e+08	9.23085e+07	2.20497e+08	2.20422e+08	6.24849e+08	1.3544e+08	1.26781e+08	1.27579e+08	1.28985e+08
Diosmetin	2.7	level2			301.069	221.7	POS	6.95663e+06	6.43349e+06	5.29435e+06	1.19562e+07	8.44806e+06	8.48751e+06	1.10645e+07	9.17834e+06	9.13278e+06	6.9965e+06	7.99752e+06	1.08857e+07	5.56823e+06	8.76925e+06	9.58061e+06	1.17356e+07	7.29768e+06	7.35283e+06	5.50857e+06	5.43701e+06	7.25793e+06	6.83709e+06	6.96089e+06	6.95476e+06	8.45421e+06	8.05408e+06	7.71898e+06	8.64935e+06
N-Phenylacetylphenylalanine	2.7	level2			282.113	218.2	NEG	5.30613e+07	5.84671e+07	4.43413e+07	5.18435e+07	4.03747e+07	5.34349e+07	8.43408e+07	1.11308e+08	6.48874e+07	9.50114e+07	7.51056e+07	6.20133e+07	5.24144e+07	4.95744e+07	5.33154e+07	2.87714e+07	4.13561e+07	8.58287e+07	4.57935e+07	3.49382e+07	3.31158e+07	1.19194e+08	8.96264e+07	1.00553e+08	6.29629e+07	6.28735e+07	6.18737e+07	6.57657e+07
2-[(2,5-Dimethylanilino)carbonyl]benzoic acid	2.7	level2			268.097	212.9	NEG	1.34043e+07	1.11918e+07	1.57499e+07	1.36194e+07	1.03888e+07	8.16142e+06	9.4688e+06	1.84842e+07	1.34688e+07	1.81979e+07	7.81232e+06	1.11468e+07	9.60046e+06	8.65851e+06	9.66713e+06	8.73148e+06	6.39837e+06	1.43262e+07	2.41617e+07	2.18593e+07	1.64461e+07	2.56201e+07	2.42464e+07	2.75903e+07	1.4057e+07	1.45516e+07	1.46197e+07	1.56989e+07
(1xi,3S)-1,2,3,4-Tetrahydro-1-methyl-beta-carboline-1,3-dicarboxylic_acid	2.7	level2			275.103	197.9	POS	1.24822e+07	1.2851e+07	8.31205e+06	1.24741e+07	4.99971e+06	1.36207e+07	1.35509e+07	1.67366e+07	1.82819e+07	1.83781e+07	1.74475e+07	1.18507e+07	5.3043e+06	3.05807e+06	0	0	0	4.83053e+06	0	0	0	1.8144e+06	0	3.36114e+06	7.80652e+06	6.55407e+06	8.30808e+06	8.15346e+06
Moupinamide	2.7	level2			314.138	195.6	POS	2.93311e+07	2.68704e+07	4.37238e+07	3.20886e+07	5.16939e+07	2.705e+07	4.61105e+07	6.04827e+07	6.65958e+07	4.85094e+07	9.40768e+07	5.00489e+07	4.53193e+07	5.68179e+07	4.77296e+07	5.06172e+07	5.65437e+07	5.01096e+07	1.23063e+07	1.28201e+07	1.01761e+07	1.77366e+07	1.25762e+07	1.82674e+07	3.88494e+07	4.12838e+07	4.1386e+07	4.10641e+07
3-(5,5-Dimethyl-5,6-dihydro[1,2,4]triazolo[3,4-a]isoquinolin-3-yl)phenol	2.7	level2			292.144	180.1	POS	2.46672e+07	1.2996e+07	1.53799e+07	1.05104e+07	1.0435e+07	2.75066e+07	3.27391e+07	8.56224e+07	2.36378e+07	3.519e+07	3.68445e+07	2.23724e+07	4.75469e+07	4.11402e+07	3.13299e+07	3.29841e+07	4.55489e+07	4.93884e+07	2.37512e+07	0	0	4.85386e+07	2.97504e+07	9.74715e+06	3.3391e+07	3.00873e+07	3.06945e+07	3.38575e+07
Methyl indole-4-carboxylate	2.7	level2			174.055	178.1	NEG	3.0196e+07	2.8799e+07	2.93844e+07	2.83606e+07	3.29518e+07	3.29537e+07	2.29171e+07	2.87762e+07	2.56526e+07	2.48829e+07	2.56293e+07	2.06127e+07	1.16878e+07	1.27777e+07	1.21258e+07	1.57377e+07	1.55506e+07	1.66232e+07	1.53533e+07	1.34766e+07	1.2691e+07	2.31628e+07	1.83439e+07	1.81843e+07	2.14272e+07	2.26336e+07	2.11192e+07	2.13146e+07
2-(4-Isopropylphenyl)-1,3-benzoxazol-5-amine	2.7	level2			253.133	174	POS	3.97519e+07	2.79716e+07	2.0833e+07	2.01283e+07	2.77386e+07	3.4714e+07	3.67023e+07	1.03179e+08	2.35172e+07	6.02151e+07	2.87895e+07	2.12012e+07	7.29479e+07	9.96587e+07	6.90863e+07	6.30434e+07	8.54626e+07	1.40812e+08	3.98055e+07	2.65277e+07	4.03423e+07	1.32411e+08	9.41672e+07	5.27606e+07	5.89323e+07	5.62754e+07	5.57743e+07	5.70611e+07
Clusin	2.7	level2			403.175	161.6	POS	3.20736e+06	3.31196e+06	2.24497e+06	2.78672e+06	1.1128e+06	4.03842e+06	2.48593e+06	1.10036e+07	2.61072e+06	2.88461e+06	5.24547e+06	1.8705e+06	7.92439e+06	5.11338e+06	8.54184e+06	1.28362e+07	1.06611e+07	2.20508e+07	1.60281e+07	6.03353e+06	1.72088e+07	2.64459e+07	1.99735e+07	1.89646e+06	7.17844e+06	7.35156e+06	6.67914e+06	7.51605e+06
Simeton	2.7	level2			198.134	150.7	POS	6.32736e+06	7.29136e+06	8.07527e+06	4.69033e+06	9.83979e+06	7.30245e+06	5.58883e+06	4.46169e+06	7.12862e+06	6.26876e+06	5.53014e+06	5.64268e+06	1.45687e+07	1.87631e+07	2.00044e+07	1.48453e+07	1.57241e+07	1.69297e+07	9.14603e+06	6.83707e+06	5.69886e+06	7.79745e+06	6.67353e+06	8.17072e+06	9.28341e+06	9.3348e+06	9.33168e+06	9.61837e+06
6-Nitro-2,3,4,9-tetrahydro-1H-carbazole	2.7	level2			215.082	142.5	NEG	8.66009e+07	8.71921e+07	9.6768e+07	8.63286e+07	8.85831e+07	9.00361e+07	7.49053e+07	9.34382e+07	9.09874e+07	8.48903e+07	8.80895e+07	7.74722e+07	6.25345e+07	6.13728e+07	6.62536e+07	5.01556e+07	5.47416e+07	7.01305e+07	4.71409e+07	4.63205e+07	3.30218e+07	5.57119e+07	5.10436e+07	5.98186e+07	7.30972e+07	6.63488e+07	6.74068e+07	6.93726e+07
3,8-Dihydroxy-1-methoxy-4-(1,3,4-trihydroxybutan-2-yl)xanthen-9-one	2.7	level2			361.094	133.4	NEG	3.92787e+07	1.94286e+07	1.42014e+07	1.57251e+07	1.39623e+07	8.58779e+06	6.22149e+07	7.70473e+06	4.66204e+07	1.58207e+07	5.04967e+07	1.80647e+07	2.05267e+07	2.85265e+07	1.68621e+07	4.91452e+07	1.69828e+07	1.07589e+07	1.03319e+07	8.21826e+06	8.17334e+06	7.96516e+06	1.99817e+07	1.60648e+07	6.17312e+06	3.66255e+07	7.20308e+06	1.79562e+07
3H-Pyrazol-3-one, 1,2-dihydro-2-[6-(4-morpholinyl)-4-pyrimidinyl]-4-(1H-1,2,3-triazol-1-yl)-	2.7	level2			315.132	30.6	POS	9.82782e+07	1.59277e+08	1.11628e+08	6.76415e+07	1.98807e+08	9.58904e+07	2.03932e+08	1.16748e+08	1.39268e+08	1.60174e+08	1.90874e+08	1.70947e+08	1.13507e+08	1.30789e+08	5.3996e+07	1.10747e+08	1.13712e+08	1.00182e+08	1.00484e+08	9.27163e+07	4.33135e+07	3.78451e+07	6.78293e+07	7.69522e+07	8.44845e+07	8.88042e+07	1.53497e+08	8.01613e+07
1-(3,4-Dichlorophenyl)pyrrolidine	2.7	level2			216.034	21.9	POS	1.764e+07	1.63086e+07	1.50554e+07	1.35744e+07	1.27876e+07	1.59174e+07	1.41648e+07	1.4403e+07	1.36275e+07	1.24629e+07	1.47187e+07	1.28266e+07	1.26539e+07	1.21098e+07	1.39301e+07	8.53319e+06	1.16358e+07	1.56004e+07	1.11002e+07	9.84701e+06	1.01543e+07	1.42335e+07	1.2414e+07	1.12039e+07	1.27469e+07	1.29683e+07	1.31097e+07	1.27694e+07
(E,E)-Boviquinone_3	2.69	level2			345.205	359.7	POS	1.41519e+06	1.94387e+06	914526	539503	853551	1.62055e+06	1.06325e+06	543297	1.41663e+06	1.36604e+06	1.25701e+06	1.20902e+06	1.50079e+06	1.16774e+06	1.96554e+06	1.06522e+06	1.39172e+06	1.05628e+06	2.62442e+06	2.31098e+06	2.90807e+06	1.24393e+06	1.36225e+06	1.14281e+06	1.66416e+06	1.87267e+06	1.45058e+06	1.96613e+06
Cafestol acetate	2.69	level2			359.221	359.7	POS	2.93456e+06	1.22997e+06	728135	1.08629e+06	1.84063e+06	1.68876e+06	1.20811e+06	2.28731e+06	867924	1.48698e+06	1.22554e+06	1.25332e+06	2.0362e+06	2.55474e+06	2.32406e+06	3.00673e+06	3.7986e+06	3.69131e+06	2.27763e+06	2.15837e+06	2.17771e+06	4.65125e+06	2.26103e+06	1.34989e+06	2.09501e+06	2.19126e+06	2.117e+06	1.878e+06
4-Ethylpiperidine	2.69	level2			114.127	355.7	POS	1.39135e+07	1.35828e+07	1.29021e+07	1.30189e+07	1.39971e+07	1.35984e+07	1.35426e+07	1.30474e+07	1.39382e+07	1.36479e+07	1.67122e+07	6.19497e+06	1.71437e+07	1.41063e+07	1.29498e+07	1.19219e+07	1.41041e+07	1.2698e+07	1.31306e+07	1.33708e+07	1.41748e+07	1.22312e+07	1.4273e+07	9.08565e+06	1.26066e+07	1.45017e+07	1.01874e+07	1.25748e+07
Thieno[3,2-b][1]benzothiophene-2-carboxylic acid	2.69	level2			232.974	354.4	NEG	1.14431e+06	0	1.58009e+06	507456	1.38224e+06	255764	189812	767004	1.94822e+06	1.17873e+06	2.62547e+06	658115	2.01742e+06	306900	94947.3	350566	258138	919387	106097	263018	1.41656e+06	0	1.53361e+06	720522	375413	0	1.74602e+06	1.61061e+06
Di-n-octyl phthalate	2.69	level2			391.283	322.7	POS	3.22732e+08	3.07334e+08	5.93888e+08	3.20841e+08	5.96907e+08	3.21229e+08	6.80878e+08	3.38384e+08	7.52261e+08	3.55388e+08	7.252e+08	3.41541e+08	3.24227e+08	3.95762e+08	5.16461e+08	5.27307e+08	5.73673e+08	2.83118e+08	5.43707e+08	3.34571e+08	5.40207e+08	3.36682e+08	3.27148e+08	3.07036e+08	2.90346e+08	3.33205e+08	3.44589e+08	3.24279e+08
15-Cyclohexylpentanorprostaglandin F2.alpha.	2.69	level2			365.234	320.7	NEG	300934	35945.4	257706	274697	173308	41906.6	32219.3	42308.7	374396	163436	246639	101672	8.97793e+06	1.06058e+07	3.05501e+06	6.19298e+06	4.3557e+06	8.25839e+06	7.78945e+06	4.11226e+06	1.93886e+06	4.3709e+06	2.31317e+06	8.89722e+06	2.98976e+06	2.89134e+06	2.61027e+06	2.79454e+06
Ubiquinol_8	2.69	level2			731.598	314	POS	4.16079e+06	4.39745e+06	6.93622e+06	4.26918e+06	7.75886e+06	5.01717e+06	5.22195e+06	8.71769e+06	5.11228e+06	5.79478e+06	3.65584e+06	6.6218e+06	3.00569e+06	6.49323e+06	4.72202e+06	3.73988e+06	2.84937e+06	3.17052e+06	4.11718e+06	4.4623e+06	5.63685e+06	4.93053e+06	3.388e+06	4.78168e+06	4.91053e+06	6.85532e+06	6.01581e+06	1.08049e+07
Canrenone	2.69	level2			339.198	308.2	NEG	2.44014e+08	1.60355e+08	1.04807e+08	7.33957e+07	1.19781e+08	8.75588e+07	2.19942e+08	1.92632e+08	1.88301e+08	1.53705e+08	2.19377e+08	1.6825e+08	1.07849e+08	8.20899e+07	1.01786e+08	9.81114e+07	1.15926e+08	6.41885e+07	7.29404e+07	5.83038e+07	7.8975e+07	1.06349e+08	6.418e+07	9.76307e+07	1.86265e+08	1.82818e+08	1.85741e+08	1.79939e+08
Laurylsulfuric acid	2.69	level2			265.147	287	NEG	1.31624e+08	1.28751e+08	1.04881e+08	1.11964e+08	1.00349e+08	1.55213e+08	3.08509e+08	3.92898e+07	5.8443e+07	3.38776e+07	2.77054e+07	3.32858e+07	2.03969e+08	2.11706e+08	9.17664e+07	1.50829e+08	1.19871e+08	1.79921e+08	1.23887e+08	6.08751e+07	4.81246e+07	1.411e+08	7.97333e+07	1.33991e+08	1.24341e+08	1.23621e+08	1.17157e+08	1.12217e+08
a-Santal-10-en-12-oic acid	2.69	level2			233.154	283.7	NEG	1.83651e+07	1.57092e+07	1.50086e+07	1.46017e+07	1.57639e+07	1.50678e+07	1.82574e+07	1.64552e+07	1.82729e+07	2.01534e+07	1.68457e+07	1.70493e+07	1.39574e+07	1.45537e+07	1.54571e+07	1.66166e+07	1.35936e+07	1.53328e+07	1.96735e+07	1.86587e+07	2.02572e+07	1.71622e+07	2.27435e+07	1.70258e+07	1.88184e+07	1.72021e+07	1.53918e+07	1.51376e+07
17-Acetoxygrindelic acid	2.69	level2			377.232	281.8	NEG	9.77032e+06	1.07529e+07	3.8521e+06	7.92379e+06	8.79217e+06	1.09682e+07	5.35766e+06	3.90604e+06	8.09125e+06	4.86648e+06	4.28738e+06	3.70091e+06	5.5275e+06	5.28092e+06	6.30404e+06	5.29768e+06	5.55412e+06	4.30476e+06	6.25263e+06	7.2713e+06	7.8962e+06	4.42346e+06	4.57379e+06	5.6656e+06	7.98463e+06	1.06971e+07	5.75086e+06	7.22498e+06
5-[(1S,2R,4aR)-1,2,4a,5-Tetramethyl-7-oxo-3,4,8,8a-tetrahydro-2H-naphthalen-1-yl]-3-methylpentanoic acid	2.69	level2			319.227	273.1	NEG	2.9562e+07	1.53895e+07	2.92369e+07	1.51126e+07	3.48422e+07	3.00312e+07	3.06444e+07	4.78047e+07	1.55929e+07	1.45071e+07	2.89114e+07	1.49392e+07	1.24381e+07	1.44176e+07	2.99533e+07	2.60628e+07	1.35698e+07	1.27587e+07	2.14367e+07	2.28604e+07	2.45274e+07	2.77849e+07	2.92676e+07	3.37408e+07	1.41386e+07	1.51789e+07	1.56098e+07	1.65759e+07
15-Ketolatanoprost (free acid)	2.69	level2			387.219	267.9	NEG	1.56036e+07	1.42624e+07	1.53356e+07	1.3978e+07	1.42993e+07	1.60134e+07	1.38926e+07	3.04177e+07	2.69055e+07	2.1056e+07	1.83483e+07	1.82222e+07	5.08936e+06	5.97563e+06	5.63536e+06	5.11846e+06	3.58168e+06	4.57604e+06	7.69932e+06	7.70257e+06	8.07208e+06	1.02372e+07	1.00847e+07	9.34967e+06	1.10948e+07	1.46975e+07	1.18064e+07	1.15113e+07
11(R)-HETE	2.69	level2			319.227	246.8	NEG	1.25293e+07	1.24675e+07	1.44701e+07	1.28414e+07	2.04301e+07	1.25458e+07	1.4619e+07	1.33944e+07	2.03925e+07	1.20007e+07	9.63424e+06	1.4113e+07	1.05503e+07	1.78474e+07	1.32175e+07	9.93733e+06	8.46569e+06	1.12316e+07	8.43405e+06	1.04923e+07	7.42516e+06	9.93152e+06	1.0192e+07	1.11349e+07	1.15949e+07	1.13569e+07	1.07663e+07	1.10258e+07
1H-2-Benzopyran-1-one, 6-hydroxy-8-methoxy-3-methyl-	2.69	level2			205.05	241.5	NEG	9.42122e+06	1.03288e+07	9.46432e+06	7.68055e+06	9.14599e+06	1.02039e+07	9.20578e+06	7.89216e+06	1.11774e+07	1.14061e+07	1.06615e+07	9.16195e+06	1.24099e+07	1.28657e+07	1.46013e+07	1.38517e+07	1.34849e+07	1.4017e+07	1.27117e+07	1.44185e+07	1.63213e+07	9.52401e+06	8.73868e+06	9.35406e+06	1.10591e+07	1.1303e+07	1.08237e+07	1.05677e+07
8-Acetamido-2-methyl-7-oxononanoic acid	2.69	level2			242.139	235	NEG	1.85354e+07	1.67625e+07	1.60662e+07	1.42165e+07	1.48668e+07	1.99064e+07	1.23015e+07	1.48607e+07	1.50759e+07	1.49757e+07	1.20005e+07	1.05555e+07	9.21845e+06	7.4957e+06	1.24915e+07	9.02347e+06	1.17732e+07	1.10391e+07	1.38941e+07	1.51911e+07	1.56167e+07	1.15018e+07	1.17521e+07	9.50524e+06	1.25142e+07	1.33409e+07	1.23744e+07	1.3342e+07
Methylgingerol	2.69	level2			307.19	234.2	NEG	1.29705e+08	1.61934e+08	1.32393e+08	1.53531e+08	1.28764e+08	1.31407e+08	1.10054e+08	1.1299e+08	1.29068e+08	1.08961e+08	1.16174e+08	9.27186e+07	9.56324e+07	1.04897e+08	1.02628e+08	9.40509e+07	9.64444e+07	9.12391e+07	8.90509e+07	8.49311e+07	1.02191e+08	9.61212e+07	8.64472e+07	7.79762e+07	1.04453e+08	1.10789e+08	1.08511e+08	1.08478e+08
Chlorantraniliprole	2.69	level2			481.976	232.9	POS	3.48935e+07	5.38276e+07	7.08911e+07	1.32327e+07	2.31658e+07	4.00768e+07	2.70206e+08	2.00208e+08	2.57015e+08	1.6147e+08	2.78903e+08	2.68682e+08	8.77173e+07	5.28666e+07	1.98608e+08	8.24605e+07	5.71389e+07	5.79432e+07	9.18499e+07	6.25307e+07	1.16901e+08	1.79333e+08	1.56178e+08	6.51081e+07	1.22904e+08	1.20785e+08	1.211e+08	1.21397e+08
15(R),19(R)-Hydroxyprostaglandin F1.alpha.	2.69	level2			371.243	232.9	NEG	3.93593e+07	4.45866e+07	5.00495e+07	4.3458e+07	2.83256e+07	4.27843e+07	4.58372e+07	4.66756e+07	5.10856e+07	5.0108e+07	4.41553e+07	4.80082e+07	4.69007e+07	4.85087e+07	5.33572e+07	4.72027e+07	4.38776e+07	4.4501e+07	906527	4.96382e+07	3.98723e+07	4.32514e+07	4.2259e+07	5.02269e+07	4.41739e+07	4.3476e+07	4.66273e+07	4.59884e+07
Piperonyl butoxide	2.69	level2			337.201	226.9	NEG	2.04617e+07	2.05825e+07	1.53706e+07	2.49675e+07	1.25411e+07	1.92441e+07	2.05797e+07	2.49489e+07	1.89575e+07	2.3366e+07	1.66907e+07	2.36702e+07	3.19482e+07	3.75158e+07	3.70569e+07	3.15884e+07	2.65826e+07	3.81947e+07	2.06551e+07	2.36864e+07	1.90687e+07	2.16847e+07	2.16657e+07	2.91183e+07	2.36799e+07	2.33648e+07	2.75363e+07	2.41429e+07
2-(3-Methylbenzyl)butanedioic acid	2.69	level2			221.081	225.5	NEG	2.12165e+07	2.31089e+07	3.20592e+07	2.29288e+07	3.05363e+07	2.3009e+07	6.08603e+07	6.11926e+07	6.39816e+07	5.96593e+07	6.1914e+07	5.21329e+07	3.01781e+07	2.88671e+07	2.51614e+07	2.20626e+07	1.83088e+07	1.89137e+07	2.48646e+07	2.49994e+07	1.82092e+07	2.80003e+07	2.70569e+07	2.78719e+07	3.30109e+07	3.31892e+07	3.36319e+07	3.3681e+07
(10E,15Z)-9,12,13-Trihydroxyoctadeca-10,15-dienoic acid	2.69	level2			327.217	224.2	NEG	2.89687e+08	3.37776e+08	2.8555e+08	3.24637e+08	3.27255e+08	3.20597e+08	2.74121e+08	3.06981e+08	2.9597e+08	2.94996e+08	2.57724e+08	2.30462e+08	2.06095e+08	1.92769e+08	1.97257e+08	1.83909e+08	1.99418e+08	1.81307e+08	1.93874e+08	1.56785e+08	1.89007e+08	2.40951e+08	2.27693e+08	2.10231e+08	2.41799e+08	2.44081e+08	2.47971e+08	2.5168e+08
2,3-Dinor-11b-PGF2a	2.69	level2			325.201	221.7	NEG	5.09349e+07	4.94011e+07	1.82304e+08	5.0584e+07	1.19407e+08	1.71318e+08	5.03296e+07	1.78201e+08	1.59205e+08	5.41173e+07	1.93113e+08	5.78253e+07	1.53901e+08	3.86166e+07	1.80753e+08	1.69261e+08	1.50489e+08	5.27299e+07	4.74447e+07	4.36781e+07	4.72167e+07	5.46114e+07	5.59049e+07	5.07653e+07	5.04745e+07	4.8566e+07	4.60067e+07	1.74355e+08
2,3-Dinor-	2.69	level2			341.196	214.5	NEG	9.32451e+07	9.69508e+07	1.30629e+08	1.04413e+08	9.08501e+07	8.82233e+07	7.29483e+07	7.14528e+07	6.07898e+07	6.72772e+07	6.60664e+07	7.63671e+07	9.82904e+07	1.10555e+08	1.31907e+08	1.07487e+08	9.20342e+07	1.18751e+08	6.90722e+07	9.02852e+07	7.53735e+07	6.73814e+07	6.99677e+07	1.0223e+08	8.83585e+07	8.77921e+07	8.32696e+07	8.32366e+07
10-Oxomorphine	2.69	level2			298.108	210.3	NEG	9.57095e+06	9.02113e+06	9.34269e+06	9.15157e+06	5.93796e+06	7.92368e+06	9.56773e+06	1.32753e+07	1.04456e+07	1.16651e+07	8.72988e+06	1.02095e+07	7.8884e+06	1.09627e+07	9.6008e+06	4.49589e+06	7.66433e+06	1.16967e+07	6.89178e+06	3.85451e+06	4.74885e+06	1.60631e+07	1.81272e+07	1.27022e+07	8.4938e+06	8.37302e+06	8.75286e+06	8.57606e+06
Aleuritic acid	2.69	level2			303.217	207.4	NEG	1.14844e+07	1.07554e+07	1.07907e+07	1.06478e+07	4.12901e+06	1.25513e+07	9.55652e+06	9.09061e+06	1.17337e+07	1.0225e+07	9.46186e+06	9.74258e+06	1.14867e+07	1.07596e+07	9.80707e+06	1.13382e+07	1.07486e+07	9.49882e+06	1.30559e+07	1.20034e+07	1.45406e+07	1.0866e+07	1.04363e+07	1.14795e+07	1.04145e+07	1.04671e+07	9.66308e+06	1.0388e+07
Propofol	2.69	level2			177.128	207.2	NEG	2.52652e+06	1.89908e+06	3.42238e+06	2.86924e+06	4.06057e+06	2.68602e+06	3.8713e+06	3.14715e+06	6.92126e+06	3.76538e+06	7.11571e+06	4.15026e+06	3.78101e+06	3.97189e+06	2.9803e+06	2.61284e+06	2.26222e+06	3.03284e+06	2.18169e+06	1.80987e+06	1.1313e+06	3.82463e+06	2.62909e+06	5.42935e+06	3.96447e+06	3.73368e+06	3.28724e+06	4.06718e+06
trans-Dehydrocurvularin	2.69	level2			289.107	203.2	NEG	5.73749e+06	4.7087e+06	7.30746e+06	1.83045e+06	7.83419e+06	8.70328e+06	7.50548e+06	1.21194e+06	3.08776e+07	6.73987e+06	2.03381e+07	4.64436e+06	5.18167e+07	5.81436e+06	3.13286e+07	4.60422e+07	3.43922e+07	3.89736e+07	1.4511e+07	1.72158e+07	1.71128e+07	7.3719e+06	7.10328e+06	8.29958e+06	9.13495e+06	9.05122e+06	8.86697e+06	9.21457e+06
2-Nitrophenol	2.69	level2			138.019	197.2	NEG	1.01031e+07	1.0527e+07	9.31887e+06	9.95379e+06	9.86673e+06	1.01891e+07	1.18937e+07	1.23582e+07	1.27719e+07	1.26668e+07	1.35325e+07	1.14595e+07	1.72454e+07	1.92265e+07	1.73339e+07	1.97253e+07	1.89352e+07	1.66565e+07	1.64188e+07	1.56671e+07	1.70142e+07	1.79541e+07	1.45983e+07	1.70073e+07	1.35156e+07	1.53707e+07	1.43051e+07	1.44496e+07
3-Cyclohexyl-2-hydroxypropanoic acid	2.69	level2			171.102	194.6	NEG	2.12211e+07	2.15391e+07	2.06167e+07	2.13791e+07	2.06021e+07	2.13247e+07	2.06759e+07	1.84686e+07	2.03491e+07	2.07556e+07	1.91187e+07	1.86816e+07	1.86813e+07	2.12212e+07	2.25148e+07	1.94569e+07	1.96701e+07	2.03849e+07	2.30997e+07	2.30094e+07	2.33393e+07	2.0219e+07	1.8164e+07	1.88937e+07	1.903e+07	2.00144e+07	2.02063e+07	1.86868e+07
7-Methoxyquinolin-4-ol	2.69	level2			174.055	193.1	NEG	1.72034e+07	1.58516e+07	1.35009e+07	1.56158e+07	1.21758e+07	1.53735e+07	1.03644e+07	1.29986e+07	1.04618e+07	1.24458e+07	1.15929e+07	1.04807e+07	9.18652e+06	8.96461e+06	6.1623e+06	7.29439e+06	7.79188e+06	1.01578e+07	6.28633e+06	4.93701e+06	6.11491e+06	1.04351e+07	8.28848e+06	8.9353e+06	9.94096e+06	9.80391e+06	1.02862e+07	9.67954e+06
Nicotelline	2.69	level2			234.102	190.7	POS	7.59043e+07	6.59282e+07	6.79546e+07	6.64073e+07	6.98313e+07	8.42991e+07	5.66682e+07	5.56184e+07	6.04923e+07	6.40937e+07	5.29761e+07	5.6373e+07	5.78195e+07	6.35438e+07	6.69179e+07	6.6373e+07	6.74489e+07	5.57427e+07	1.21305e+08	1.41865e+08	1.51252e+08	8.11013e+07	8.75501e+07	8.26529e+07	7.22824e+07	7.70329e+07	7.33471e+07	7.50673e+07
16-Methyl-epi-nigakihemiacetal_B	2.69	level2			405.226	188.6	POS	1.17272e+07	1.21306e+07	1.05315e+07	9.54799e+06	9.73244e+06	1.07102e+07	3.68259e+06	2.62079e+07	1.2017e+07	5.05918e+06	1.2516e+07	2.6087e+06	2.23681e+07	8.31735e+06	2.87716e+07	3.56635e+07	3.0797e+07	6.60704e+07	3.26457e+07	7.43558e+06	3.01646e+07	5.6259e+07	3.14135e+07	2.51182e+06	1.54081e+07	1.63478e+07	1.59564e+07	1.81213e+07
5,7-Dihydroxy-2-(4-hydroxyphenyl)-4-oxo-4H-chromen-3-yl 6-O-(6-deoxyhexopyranosyl)hexopyranoside	2.69	level2			593.149	187.4	NEG	3.45444e+07	4.92556e+07	2.29176e+07	3.33575e+07	6.77236e+07	5.15611e+07	4.72228e+07	3.78043e+07	1.87438e+07	3.49817e+07	4.17618e+07	2.97344e+07	3.88969e+07	4.73157e+07	7.64552e+07	1.23309e+08	1.20279e+08	4.37777e+07	6.87917e+07	7.75579e+07	1.22494e+08	5.88565e+07	5.99794e+07	5.57136e+07	5.55938e+07	5.6732e+07	5.96005e+07	5.70022e+07
1-(2-Furanyl)-1-octanone	2.69	level2			195.137	182.8	POS	7.97119e+06	9.02343e+06	5.28468e+06	8.28104e+06	7.86454e+06	2.57193e+06	1.05412e+07	1.29979e+07	7.42303e+06	8.10903e+06	7.19664e+06	7.21077e+06	1.57936e+07	8.07353e+06	8.7121e+06	8.92726e+06	9.5195e+06	5.19069e+06	8.25093e+06	9.98958e+06	8.71656e+06	6.01619e+06	8.34451e+06	7.29371e+06	5.48022e+06	7.86944e+06	8.19664e+06	5.25454e+06
N-Benzylacetamidine	2.69	level2			149.107	182.7	POS	5.6413e+07	3.63889e+07	3.53214e+07	3.31682e+07	4.73599e+07	4.87898e+07	5.15079e+07	1.01659e+08	3.83355e+07	6.04484e+07	5.46159e+07	3.99162e+07	9.52386e+07	1.52211e+08	7.66535e+07	8.53323e+07	1.06201e+08	1.23793e+08	6.55279e+07	5.02645e+07	6.73021e+07	1.1378e+08	8.58722e+07	4.97379e+07	7.4231e+07	7.67005e+07	6.57695e+07	7.20113e+07
3,4-Dimethylbenzoic acid	2.69	level2			149.06	182.1	NEG	5.14968e+06	5.23429e+06	6.4675e+06	5.39934e+06	5.2793e+06	6.02927e+06	6.51954e+06	7.7382e+06	7.09082e+06	7.66714e+06	8.94667e+06	6.22531e+06	6.38452e+06	6.40468e+06	3.88269e+06	3.72958e+06	4.61326e+06	6.35917e+06	4.37333e+06	3.51331e+06	3.41816e+06	5.92086e+06	5.74339e+06	5.48544e+06	5.32547e+06	5.79739e+06	5.6892e+06	5.4652e+06
3,5-Di-tert-butyl-2-hydroxybenzaldehyde	2.69	level2			235.168	181.8	POS	2.14142e+07	2.5848e+07	2.61639e+07	2.26135e+07	2.45707e+07	2.3249e+07	2.81428e+07	2.0067e+07	3.45273e+07	2.87182e+07	2.64193e+07	2.86218e+07	3.29895e+07	2.72582e+07	2.05936e+07	2.2938e+07	2.52872e+07	1.80817e+07	2.66165e+07	2.03173e+07	1.63602e+07	1.74607e+07	2.26431e+07	2.79219e+07	2.36519e+07	2.53949e+07	2.41213e+07	3.40756e+07
Gallic acid	2.69	level2			169.014	175.7	NEG	0	947144	0	776200	395225	0	1.15519e+06	501605	200886	4.91612e+06	7.32431e+06	0	320887	154360	0	5.24671e+06	3.47725e+06	0	1.82495e+06	188664	994649	3.87877e+06	0	5.01681e+06	1.42435e+06	1.60748e+06	1.59331e+06	1.29092e+06
Malonyltryptophan	2.69	level2			289.082	168	NEG	3.41878e+08	3.77747e+08	2.75211e+08	3.21587e+08	3.08705e+08	3.24296e+08	3.68505e+08	3.74887e+08	3.71242e+08	2.94455e+08	3.58599e+08	2.59698e+08	4.13157e+08	5.16189e+08	4.1965e+08	4.47581e+08	4.17231e+08	5.95316e+08	3.46962e+08	2.94378e+08	3.67578e+08	5.82638e+08	4.50338e+08	4.58983e+08	4.02951e+08	3.847e+08	3.76168e+08	3.96582e+08
Poncirin	2.69	level2			593.185	167.1	NEG	3.23762e+06	4.84418e+06	2.04245e+06	4.53665e+06	1.67513e+06	1.55973e+06	2.94049e+06	4.57283e+06	1.69373e+06	2.29023e+06	1.01016e+06	1.95909e+06	1.62843e+06	1.26059e+06	937721	998394	1.69352e+06	927038	1.26949e+06	1.31629e+06	303763	2.38471e+06	2.08233e+06	1.35941e+06	3.33631e+06	2.14871e+06	2.68375e+06	2.49798e+06
1,2,4-Triazin-5-amine, N-([1,1'-biphenyl]-4-ylmethyl)-6-phenyl-3-(2-pyridinyl)-	2.69	level2			414.174	163.8	NEG	2.27699e+07	2.03331e+07	1.84314e+07	2.43768e+07	1.94151e+07	2.93817e+07	1.43145e+07	1.41247e+07	1.53357e+07	1.61517e+07	1.09437e+07	1.16723e+07	1.69761e+07	2.55927e+07	1.70503e+07	1.488e+07	8.04305e+06	2.13513e+07	1.49991e+07	1.37903e+07	1.02618e+07	1.34299e+07	1.27352e+07	1.26978e+07	1.9374e+07	1.83188e+07	2.53285e+07	1.61733e+07
Harman	2.69	level2			183.091	162.9	POS	2.19661e+07	2.25684e+07	2.19623e+07	2.34907e+07	1.93542e+07	2.38208e+07	1.66152e+07	2.10558e+07	2.21586e+07	2.46012e+07	1.8463e+07	1.84229e+07	1.44231e+07	1.28563e+07	1.13599e+07	8.90506e+06	1.11836e+07	1.67337e+07	1.24113e+07	1.21893e+07	1.26931e+07	1.4389e+07	1.19864e+07	1.31957e+07	1.61787e+07	1.6751e+07	1.68264e+07	1.72247e+07
Methanesulfonamide, N-[4-[[1-[2-(6-methyl-2-pyridinyl)ethyl]-4-piperidinyl]carbonyl]phenyl]-	2.69	level2			400.169	161.7	NEG	2.68958e+07	4.49568e+07	3.41169e+07	2.54568e+07	3.16357e+07	3.94115e+07	1.2907e+07	1.13192e+07	2.49516e+07	1.46732e+07	2.52967e+07	2.43022e+07	3.25601e+07	2.44049e+07	3.43553e+07	3.46597e+07	2.80261e+07	1.8353e+07	3.61008e+07	4.2697e+07	3.90841e+07	2.33791e+07	2.25696e+07	1.85028e+07	2.6916e+07	2.8522e+07	2.88752e+07	2.77225e+07
Metazamide	2.69	level2			205.096	157.6	POS	6.81665e+07	1.18207e+08	7.64455e+07	6.53765e+07	8.89904e+07	9.50127e+07	7.70146e+07	7.39464e+07	8.32982e+07	9.31051e+07	7.64431e+07	1.26194e+08	6.73034e+07	7.16499e+07	8.73444e+07	7.02857e+07	6.26369e+07	7.10491e+07	9.85317e+07	1.06996e+08	1.16347e+08	7.05003e+07	6.85771e+07	7.6843e+07	8.15098e+07	1.22714e+08	8.16847e+07	8.09203e+07
N-Allyl-1H-purin-6-amine	2.69	level2			176.094	151.6	POS	7.36091e+06	7.25858e+06	1.2068e+07	4.71051e+06	8.94808e+06	7.34408e+06	9.01743e+06	1.08241e+07	6.96371e+06	8.03721e+06	7.82508e+06	6.95324e+06	1.70572e+07	1.29371e+07	1.74299e+07	2.09019e+07	2.14092e+07	2.15075e+07	1.6318e+07	9.24246e+06	1.54714e+07	1.39394e+07	1.60015e+07	9.23066e+06	1.46425e+07	1.42009e+07	1.42341e+07	1.21461e+07
3-(3-Hydroxypropyl)-3,5-dihydro-4H-pyrimido[5,4-b]indol-4-one	2.69	level2			244.107	149.1	POS	0	0	0	0	1.8855e+06	0	6.85842e+06	2.3081e+07	1.5488e+06	1.33224e+07	5.26441e+06	2.20524e+06	4.33689e+06	3.44071e+06	9.00288e+06	2.18398e+06	4.13544e+06	1.69681e+07	4.57429e+06	8.41927e+06	1.48328e+07	1.86992e+07	1.38368e+07	4.68108e+06	6.0202e+06	6.26836e+06	8.01204e+06	7.41066e+06
Succinic_acid_semialdehyde	2.69	level2			101.024	144.5	NEG	3.31754e+07	3.1556e+07	3.6231e+07	3.18152e+07	2.97158e+07	3.17522e+07	3.27369e+07	3.2318e+07	3.07254e+07	3.08101e+07	3.00156e+07	3.01796e+07	3.12251e+07	2.91047e+07	3.25972e+07	2.842e+07	3.10692e+07	3.18633e+07	5.09884e+07	2.90153e+07	7.43622e+07	3.12126e+07	3.03354e+07	3.18179e+07	2.87748e+07	2.9423e+07	3.1253e+07	3.09363e+07
6,9-Diamino-2-ethoxyacridine	2.69	level2			254.128	135.9	POS	1.23971e+07	5.28897e+06	7.45738e+06	1.04132e+07	6.89406e+06	2.99252e+06	1.73866e+07	2.19331e+07	1.23681e+07	1.78678e+07	1.40253e+07	1.81605e+07	4.5456e+07	4.72453e+07	3.1672e+07	5.16548e+07	5.50566e+07	6.99247e+07	3.86525e+07	1.45198e+07	4.56311e+07	6.25593e+07	4.62928e+07	1.93461e+07	2.40909e+07	2.32474e+07	2.25858e+07	2.34492e+07
5-(4-Hydroxybenzylidene)-1,3-dimethyl-2,4,6(1H,3H,5H)-pyrimidinetrione	2.69	level2			259.072	133.9	NEG	1.8658e+08	1.55703e+08	9.91735e+07	1.57383e+08	8.77189e+07	1.4286e+08	6.00472e+07	6.27896e+07	3.56432e+07	4.66408e+07	3.51874e+07	2.38248e+07	3.30687e+07	4.43843e+07	2.91167e+07	3.62728e+07	4.9197e+07	1.18374e+08	9.16321e+07	6.47262e+07	5.18828e+07	7.78067e+07	5.23762e+07	5.85939e+07	1.35078e+08	5.67113e+07	6.59483e+07	7.37922e+07
4-Nitro-1-naphthol	2.69	level2			188.035	131.9	NEG	3.45703e+08	1.9866e+08	2.78601e+08	2.14338e+08	3.11607e+08	2.06069e+08	3.35149e+08	1.6519e+08	3.77936e+08	3.15193e+08	2.59418e+08	2.66466e+08	2.12556e+08	2.13671e+08	1.45173e+08	1.26042e+08	1.49875e+08	1.27278e+08	2.28107e+08	2.36412e+08	1.87998e+08	1.64769e+08	1.53547e+08	1.47967e+08	3.46849e+08	2.10701e+08	3.45313e+08	1.4805e+08
2-Cyclohexyl-5-nitro-1H-benzimidazole	2.69	level2			246.123	128.8	POS	3.52104e+07	1.6713e+07	1.55512e+07	9.4921e+06	2.793e+07	3.55713e+07	1.05626e+07	3.67992e+07	12034308	1.96349e+07	1.67265e+07	0	3.60891e+07	4.65407e+07	4.17674e+07	5.17392e+07	4.3802e+07	9.71583e+07	2.84965e+07	2.52618e+07	5.987e+07	1.00984e+08	8.11725e+07	2.06475e+07	3.63717e+07	3.72112e+07	3.81213e+07	3.79056e+07
(2E)-2-(Propan-2-yl)but-2-enedioic acid	2.69	level2			157.05	74.1	NEG	4.0995e+07	5.02631e+07	3.87815e+07	3.7247e+07	4.17382e+07	4.50427e+07	4.6901e+07	4.83608e+07	3.29228e+07	4.56856e+07	4.49214e+07	4.15558e+07	2.65213e+07	3.74272e+07	4.09952e+07	3.78494e+07	2.99516e+07	2.59046e+07	4.95819e+07	3.68724e+07	3.83476e+07	4.5176e+07	4.38643e+07	4.45396e+07	3.35477e+07	3.51638e+07	2.71821e+07	4.82546e+07
Fatostatin	2.69	level2			295.127	69.6	POS	1.66126e+08	2.10015e+08	1.19369e+08	2.36627e+08	9.43129e+07	1.53562e+08	9.94555e+07	1.18735e+08	5.53218e+07	9.10185e+07	6.18433e+07	4.80024e+07	4.09873e+07	3.73327e+07	4.55395e+07	3.38843e+07	5.8207e+07	8.76377e+07	4.88196e+07	3.98457e+07	4.66022e+07	1.41394e+08	1.07628e+08	1.24953e+08	9.52537e+07	9.03564e+07	9.66995e+07	1.01774e+08
3-Chloro-6-nitro-9H-carbazole	2.69	level2			245.011	61.9	NEG	5.89755e+06	1.66282e+07	1.6453e+07	1.3161e+07	2.06228e+07	6.18658e+06	1.33467e+07	1.14679e+07	1.98676e+07	4.33751e+06	1.99269e+07	1.58722e+07	1.17801e+07	2.04444e+07	2.09798e+07	1.70961e+07	1.79637e+07	1.31262e+07	1.95923e+07	1.15489e+07	1.71275e+07	2.13324e+07	1.57011e+07	1.92381e+07	1.94319e+07	4.66585e+06	1.89216e+07	1.95202e+07
N,N'-Bis(2,4-dimethylphenyl)imidoformamide	2.69	level2			253.169	59.7	POS	1.14217e+08	8.90446e+07	8.72351e+07	9.59896e+07	8.20883e+07	9.82059e+07	6.12821e+07	6.81611e+07	7.6228e+07	7.8489e+07	7.17614e+07	4.31694e+07	4.51171e+07	3.12788e+07	4.54009e+07	3.23379e+07	5.02067e+07	4.59869e+07	5.58122e+07	4.76322e+07	5.0786e+07	5.065e+07	6.0517e+07	5.44392e+07	5.67604e+07	5.9423e+07	7.02178e+07	6.34879e+07
10,11-trans-Dihydroxy-10,11-dihydrocarbamazepine	2.69	level2			271.107	48.5	POS	5.40528e+06	2.13743e+06	2.82724e+06	2.77986e+06	6.59541e+06	5.77945e+06	5.71992e+06	1.26624e+07	4.7367e+06	8.07171e+06	3.99924e+06	6.50008e+06	4.62863e+06	7.49545e+06	7.18061e+06	5.17005e+06	5.79841e+06	8.36712e+06	5.85275e+06	3.8907e+06	6.42082e+06	3.52661e+06	5.51019e+06	4.63076e+06	2.42713e+06	6.64738e+06	4.2909e+06	5.59771e+06
1,3-Dimethyl-5-(4-toluidinomethylene)-2,4,6(1H,3H,5H)-pyrimidinetrione	2.69	level2			274.118	45.4	POS	2.07844e+07	2.17989e+07	1.51889e+07	1.91238e+07	2.41005e+07	2.27848e+07	2.70741e+07	3.27981e+07	2.18221e+07	2.51126e+07	2.20271e+07	2.13903e+07	2.46905e+07	1.77218e+07	3.37363e+07	1.49505e+07	2.86333e+07	4.76623e+07	2.01125e+07	3.64208e+06	2.05966e+07	5.76799e+07	3.36527e+07	2.99026e+07	2.33441e+07	2.32721e+07	2.29786e+07	3.11647e+07
Olaparib	2.69	level2			433.17	38.8	NEG	4.84234e+07	2.28638e+07	2.8383e+07	1.84161e+07	1.59544e+07	2.02875e+07	2.46566e+07	2.4612e+07	2.76445e+07	2.04518e+07	2.33006e+07	4.44405e+07	5.14151e+07	5.31128e+07	2.51103e+07	3.36664e+07	5.89255e+07	3.5485e+07	2.79733e+07	5.22374e+07	7.22539e+07	2.09669e+07	1.5441e+07	2.40399e+07	3.18865e+07	3.26327e+07	1.9756e+07	2.86349e+07
Difloxacin	2.69	level2			400.145	38.2	POS	598590	1.21085e+06	1.00672e+06	1.54855e+06	1.37706e+06	495424	1.32194e+06	1.92657e+06	2.26024e+06	1.84394e+06	1.4725e+06	2.06509e+06	2.18633e+06	1.43795e+06	2.00181e+06	1.45875e+06	553216	210956	1.07125e+06	1.41819e+06	1.66321e+06	698572	1.20103e+06	717414	223775	655421	945028	929659
3-[(Ethylanilino)methyl]benzenesulfonic acid	2.69	level2			290.087	26.1	NEG	2.06225e+07	2.56661e+07	2.17363e+07	2.97256e+07	2.54521e+07	2.08269e+07	1.25447e+07	9.89365e+06	1.3379e+07	1.09084e+07	1.45325e+07	1.36792e+07	1.3475e+07	1.35859e+07	1.157e+07	1.67761e+07	2.5322e+07	1.54429e+07	9.2127e+06	9.39515e+06	1.08194e+07	1.17448e+07	1.0203e+07	1.13557e+07	1.48993e+07	1.56753e+07	1.49474e+07	1.5924e+07
4-Bromo-2-formylbenzonitrile	2.69	level2			209.955	22.5	POS	5.01756e+07	4.73809e+07	5.17506e+07	4.95837e+07	5.53959e+07	4.6021e+07	6.8406e+07	7.15663e+07	6.38044e+07	6.47637e+07	6.58145e+07	6.6715e+07	7.26952e+07	8.09845e+07	7.19548e+07	6.41726e+07	7.19489e+07	9.09365e+07	6.48289e+07	5.02386e+07	5.116e+07	1.11425e+08	9.8178e+07	1.05827e+08	6.72954e+07	6.60891e+07	6.7461e+07	6.95719e+07
2-Methylpiperidine	2.68	level2			100.112	356.1	POS	9.46047e+07	1.02532e+08	9.49314e+07	9.44937e+07	9.07568e+07	9.28938e+07	9.17125e+07	1.01001e+08	8.53196e+07	9.89178e+07	8.9008e+07	8.85343e+07	8.61487e+07	9.09398e+07	9.0112e+07	8.57056e+07	1.03446e+08	9.92522e+07	9.42551e+07	1.02636e+08	9.27301e+07	9.27704e+07	1.04899e+08	9.61549e+07	9.80231e+07	9.30998e+07	1.05251e+08	9.35628e+07
N-Benzyl-N,N-dimethyl-1-hexadecanaminium cation	2.68	level2			360.361	331.1	POS	969330	1.32958e+06	967490	1.73026e+06	1.15123e+06	621878	1.39466e+06	1.6391e+06	0	1.43503e+06	1.5137e+06	763411	1.41135e+06	0	1.67094e+06	1.43769e+06	1.53688e+06	1.86859e+06	954040	937220	1.8113e+06	1.23743e+06	1.58749e+06	1.1578e+06	1.43682e+06	1.69334e+06	1.34472e+06	1.57516e+06
[6]-Gingerdiol_3,5-diacetate	2.68	level2			379.214	314.7	NEG	1.3321e+07	1.7006e+07	1.14593e+07	1.69306e+07	1.52017e+07	1.37794e+07	8.73108e+06	9.86359e+06	9.51139e+06	8.38087e+06	6.43397e+06	8.62914e+06	3.99749e+06	3.18678e+06	2.89332e+06	3.71217e+06	2.82552e+06	3.98156e+06	3.22052e+06	3.01976e+06	4.96452e+06	8.86752e+06	5.36069e+06	4.13651e+06	8.0236e+06	8.70722e+06	7.28293e+06	7.0968e+06
13[(2R,3S)-3-Pentyloxiranyl]-8Z-tridecenoic acid	2.68	level2			323.258	313.4	NEG	2.44624e+07	2.40542e+07	3.00593e+07	2.69239e+07	2.97258e+07	2.7257e+07	2.06152e+07	1.93673e+07	2.40489e+07	2.44559e+07	1.89834e+07	2.17593e+07	2.28103e+07	2.54e+07	2.7701e+07	2.37951e+07	2.28589e+07	2.07583e+07	3.54577e+07	3.46885e+07	3.52079e+07	2.85673e+07	3.25042e+07	3.50875e+07	2.68914e+07	2.80083e+07	2.73229e+07	2.74889e+07
Laurocapram	2.68	level2			282.278	309.5	POS	3.19273e+07	3.5914e+07	4.10748e+07	3.27394e+07	3.28378e+07	3.00144e+07	6.26648e+07	5.19246e+07	7.61753e+07	6.14264e+07	3.99203e+07	5.50953e+07	3.3859e+07	5.29381e+07	4.14327e+07	2.56279e+07	4.10491e+07	3.28836e+07	3.28743e+07	3.03585e+07	2.64007e+07	3.83405e+07	3.18595e+07	5.18407e+07	4.12046e+07	4.12943e+07	3.7246e+07	3.85326e+07
20-carboxy-LTB4	2.68	level2			365.199	307.5	NEG	1.69044e+06	2.04784e+06	2.32831e+06	3.30217e+06	3.70169e+06	1.5132e+06	952101	480056	256288	677012	847064	1.03703e+06	0	0	0	324207	114323	147640	177849	133416	143893	723535	258300	336903	1.23776e+06	188745	349917	681947
Galaxolide	2.68	level2			259.205	295.6	POS	1.00014e+08	1.03316e+08	1.0323e+08	9.31929e+07	8.35678e+07	1.05949e+08	1.04137e+08	1.00842e+08	1.3284e+08	1.34976e+08	1.07438e+08	1.04696e+08	9.18423e+07	8.68229e+07	7.8264e+07	6.95349e+07	8.08341e+07	8.06849e+07	1.11713e+08	9.74563e+07	8.98206e+07	1.19365e+08	1.10212e+08	1.1737e+08	9.459e+07	1.02875e+08	1.00274e+08	9.716e+07
1-Naphthalenecarboxylic acid, 1,2,4a,5,6,7,8,8a-octahydro-2-(2-hydroxybutyl)-1,3-dimethyl-, [1R-[1.alpha.,2.beta.(R*),4a.alpha.,8a.alpha.]]-	2.68	level2			279.195	293	NEG	7.9131e+06	8.37028e+06	9.72688e+06	5.83956e+06	9.29294e+06	1.02967e+07	9.4684e+06	7.61276e+06	9.21161e+06	1.25245e+07	1.29314e+07	1.30867e+07	7.7578e+06	8.82514e+06	1.29921e+07	1.14081e+07	8.47137e+06	6.09313e+06	1.73065e+07	1.85526e+07	1.88683e+07	1.5211e+07	1.51498e+07	8.14334e+06	1.21326e+07	1.12216e+07	1.07455e+07	1.1562e+07
Carbocyclic thromboxane A2	2.68	level2			347.258	282.9	NEG	2.1994e+07	2.36175e+07	1.98668e+07	1.7648e+07	2.1361e+07	2.38283e+07	1.90749e+07	1.70529e+07	2.25094e+07	2.39841e+07	2.1273e+07	1.78039e+07	2.60652e+07	2.53473e+07	2.74601e+07	3.15675e+07	2.45269e+07	2.81386e+07	3.49229e+07	3.84539e+07	4.4814e+07	2.15905e+07	1.94521e+07	2.02676e+07	2.41626e+07	2.50751e+07	2.41876e+07	2.40062e+07
Ethanone, 1-(3,4-dihydroxyphenyl)-2-(2-ethyl-1H-imidazol-1-yl)-	2.68	level2			245.092	281	NEG	1.90021e+07	1.71933e+07	1.34801e+07	3.22874e+07	1.75986e+07	1.58708e+07	1.74744e+07	1.83935e+07	1.6792e+07	1.42415e+07	1.53586e+07	1.33611e+07	1.52232e+07	1.70294e+07	1.67907e+07	1.69043e+07	1.6725e+07	4.45598e+07	1.54286e+07	1.40626e+07	1.603e+07	2.05391e+07	2.00549e+07	1.74124e+07	1.53477e+07	1.7056e+07	1.77839e+07	1.66059e+07
5-[(1S,2R,4aR)-5-(Hydroxymethyl)-1,2,4a-trimethyl-2,3,4,7,8,8a-hexahydronaphthalen-1-yl]-3-methylpentanoic acid	2.68	level2			321.242	279.2	NEG	4.14273e+07	4.42569e+07	3.80536e+07	5.14583e+07	5.07207e+07	4.00153e+07	4.17561e+07	7.77024e+07	4.03395e+07	4.3891e+07	3.92985e+07	4.94325e+07	6.97237e+07	5.41085e+07	6.44701e+07	5.35398e+07	4.0407e+07	5.33175e+07	3.4027e+07	6.09509e+07	2.80751e+07	5.68746e+07	4.04491e+07	4.9739e+07	4.46918e+07	6.52562e+07	4.22775e+07	4.27914e+07
Sydonol	2.68	level2			251.164	262.6	NEG	5.35429e+06	5.79044e+06	5.42135e+06	5.79096e+06	5.78634e+06	5.60539e+06	6.17999e+06	9.79231e+06	8.54362e+06	7.68096e+06	6.44176e+06	6.52864e+06	7.55727e+06	5.74746e+06	6.20531e+06	5.07651e+06	2.24517e+06	5.09804e+06	9.01702e+06	9.33621e+06	9.71113e+06	5.94518e+06	5.71142e+06	4.54572e+06	6.33031e+06	8.38127e+06	6.97175e+06	6.93664e+06
Benzofenap	2.68	level2			431.094	261.9	POS	0	0	0	0	0	0	0	0	0	0	0	0	4.48751e+07	5.37333e+07	1.79228e+07	2.96576e+07	2.71541e+07	4.48884e+07	3.04334e+07	1.92457e+07	8.5576e+06	1.36917e+07	8.48912e+06	3.08022e+07	1.34535e+07	1.39083e+07	1.36285e+07	1.43978e+07
Dodemorph	2.68	level2			282.278	258.7	POS	1.90672e+07	1.89091e+07	2.21541e+07	1.85627e+07	2.15587e+07	2.37309e+07	2.33495e+07	3.14992e+07	2.50237e+07	2.65163e+07	2.77785e+07	2.5097e+07	2.67255e+07	3.04189e+07	2.34424e+07	2.15239e+07	2.21393e+07	2.38079e+07	1.79782e+07	1.49085e+07	1.6092e+07	3.19201e+07	3.0454e+07	2.81542e+07	2.45997e+07	2.42999e+07	2.18021e+07	2.14858e+07
1,2,2,6,6-Pentamethyl-4-piperidinol	2.68	level2			172.169	251.4	POS	4.03998e+06	2.71098e+06	465174	3.19953e+06	1.66608e+06	3.02719e+06	3.23545e+06	2.10781e+06	1.80356e+06	2.5795e+06	1.93859e+06	2.68619e+06	1.75503e+06	2.97668e+06	2.30599e+06	3.1884e+06	3.77267e+06	1.70114e+06	4.2905e+06	1.85712e+06	3.27063e+06	2.83912e+06	2.00235e+06	2.57553e+06	3.20583e+06	3.65502e+06	2.84071e+06	3.61406e+06
1H-2-Benzopyran-1-one, 3,4-dihydro-8-hydroxy-3-(4-hydroxypentyl)-	2.68	level2			249.113	249.3	NEG	4.57036e+06	4.47363e+06	4.46777e+06	4.70094e+06	4.34485e+06	4.47347e+06	4.58888e+06	5.22019e+06	5.23114e+06	5.99661e+06	4.1676e+06	5.2261e+06	3.69622e+06	3.37447e+06	1.91609e+06	2.20391e+06	2.57059e+06	2.36753e+06	1.39766e+06	1.71532e+06	1.66146e+06	3.41224e+06	2.89928e+06	3.55756e+06	3.53368e+06	3.69813e+06	3.44339e+06	3.68725e+06
Dodeca-2(E),4(E)-dienoic acid	2.68	level2			195.138	247.4	NEG	1.32607e+07	1.12684e+07	9.36174e+06	1.42358e+07	1.2612e+07	1.82524e+07	1.69103e+07	1.19895e+07	1.8626e+07	1.50465e+07	1.13158e+07	1.24953e+07	9.51682e+06	1.52206e+07	1.57681e+07	1.3636e+07	1.42314e+07	1.4789e+07	1.57436e+07	1.21202e+07	1.3406e+07	1.60369e+07	1.29268e+07	1.35329e+07	1.28528e+07	1.31633e+07	1.27134e+07	2.32475e+07
Dicyclohexyl(hydroxy)acetic acid	2.68	level2			239.164	239.5	NEG	3.33325e+07	3.7429e+07	4.19207e+07	3.56638e+07	4.32536e+07	3.62409e+07	4.69702e+07	4.86247e+07	4.91714e+07	4.38511e+07	4.6338e+07	4.56563e+07	4.56772e+07	4.57902e+07	4.40774e+07	3.76104e+07	3.71091e+07	3.73612e+07	3.25268e+07	3.12474e+07	2.6583e+07	3.53285e+07	3.51292e+07	4.1765e+07	4.05103e+07	3.96638e+07	3.88546e+07	3.97567e+07
2-Pentenedioic acid, 2-octyl-	2.68	level2			241.144	238.1	NEG	1.38062e+07	1.5897e+07	1.53676e+07	1.48355e+07	1.47869e+07	1.47899e+07	1.5079e+07	1.70006e+07	1.654e+07	1.60405e+07	1.56548e+07	1.61384e+07	1.81621e+07	1.98467e+07	2.02972e+07	1.97294e+07	1.76747e+07	1.85815e+07	1.73038e+07	1.29759e+07	1.16622e+07	1.42421e+07	1.40038e+07	1.4668e+07	1.59924e+07	1.79696e+07	1.55135e+07	1.58977e+07
(+)-trans-Chrysanthemic acid	2.68	level2			167.107	237.5	NEG	1.18e+07	1.12354e+07	1.11958e+07	1.07143e+07	1.17168e+07	1.37618e+07	1.05169e+07	1.00777e+07	1.24903e+07	1.12209e+07	1.08175e+07	7.05672e+06	1.23162e+07	1.53836e+07	1.45253e+07	1.45069e+07	1.32684e+07	1.38437e+07	1.30579e+07	1.39035e+07	1.45754e+07	9.99383e+06	9.9181e+06	1.00444e+07	1.20145e+07	1.21587e+07	1.21944e+07	1.18437e+07
Yucalexin_B16	2.68	level2			301.215	230.9	POS	2.44996e+08	2.81386e+08	2.87059e+08	3.88508e+08	3.82456e+08	2.65836e+08	3.24561e+08	3.73019e+08	3.52262e+08	3.0498e+08	2.96934e+08	3.91752e+08	4.57964e+08	2.22474e+08	2.70345e+08	2.08325e+08	1.78186e+08	2.11651e+08	1.61278e+08	1.9256e+08	1.51453e+08	1.69154e+08	1.81962e+08	2.97804e+08	3.44183e+08	2.4978e+08	2.4978e+08	3.16016e+08
Nandrolone	2.68	level2			275.199	226.3	POS	1.32612e+08	2.6508e+08	2.81445e+08	1.46651e+08	3.50084e+08	1.36339e+08	2.1313e+08	2.66201e+08	2.36713e+08	1.9552e+08	2.08357e+08	1.88979e+08	1.48916e+08	1.41365e+08	1.23019e+08	1.96282e+08	1.02237e+08	1.11359e+08	1.0769e+08	1.0365e+08	9.00325e+07	1.24604e+08	1.82643e+08	1.65048e+08	2.22948e+08	1.36521e+08	1.28723e+08	2.32266e+08
13,14-Dihydro-15-keto-PGE2	2.68	level2			351.216	225	NEG	4.79677e+07	5.47074e+07	5.01742e+07	4.9864e+07	5.75642e+07	5.11414e+07	5.50749e+07	5.46922e+07	5.18216e+07	4.64211e+07	4.91925e+07	5.5997e+07	5.15213e+07	5.38997e+07	6.11036e+07	5.43181e+07	4.63139e+07	5.13595e+07	4.39943e+07	4.59407e+07	3.63497e+07	4.0577e+07	4.42173e+07	5.64919e+07	4.99646e+07	4.9966e+07	4.96207e+07	5.14448e+07
2-Amino-4-phenyl-4H-pyrano[3,2-h]quinoline-3-carbonitrile	2.68	level2			300.112	223	POS	3.2324e+07	2.62706e+07	2.90519e+07	2.41967e+07	2.27376e+07	3.52913e+07	2.54927e+07	3.55638e+07	4.21879e+07	3.77701e+07	2.86353e+07	2.58596e+07	1.89126e+07	1.42951e+07	1.246e+07	1.24344e+07	1.61216e+07	1.87185e+07	1.40689e+07	1.55307e+07	1.52643e+07	1.32099e+07	1.37739e+07	1.15187e+07	2.1673e+07	2.1685e+07	2.22264e+07	2.24381e+07
Tetradecanedioic acid	2.68	level2			257.175	221.4	NEG	7.16383e+07	7.54609e+07	8.55586e+07	6.83423e+07	1.06329e+08	7.19512e+07	7.32601e+07	9.8706e+07	8.02913e+07	7.27397e+07	7.59322e+07	7.45163e+07	9.72173e+07	1.07422e+08	1.0112e+08	9.86768e+07	8.42079e+07	9.5972e+07	8.42546e+07	8.16489e+07	5.89795e+07	8.18827e+07	8.03586e+07	1.09658e+08	8.19061e+07	8.27126e+07	8.67415e+07	8.3767e+07
Aflatoxin G2	2.68	level2			331.08	219	POS	9.12991e+07	9.28785e+07	6.85241e+07	1.18374e+08	8.65065e+07	8.85608e+07	8.82933e+07	1.13021e+08	7.67519e+07	8.66034e+07	7.44504e+07	7.41652e+07	5.95603e+07	7.90181e+07	9.97986e+07	1.08385e+08	6.36369e+07	9.09074e+07	7.24417e+07	7.36526e+07	8.86695e+07	8.75246e+07	9.73666e+07	8.52533e+07	8.56285e+07	8.86416e+07	8.81479e+07	8.63753e+07
Cucujolide_VIII	2.68	level2			197.153	215.8	POS	9.23838e+06	1.10922e+07	1.18598e+07	1.00681e+07	1.68857e+07	7.91946e+06	1.10522e+07	1.34948e+07	1.972e+07	1.30639e+07	1.05117e+07	9.90298e+06	7.66682e+06	6.57414e+06	7.39512e+06	7.43531e+06	2.39075e+06	4.81836e+06	3.32805e+06	2.0299e+06	1.85286e+06	3.39676e+06	4.20006e+06	4.94323e+06	8.94152e+06	8.90554e+06	8.45998e+06	7.95331e+06
1.alpha.-Methyl-5.alpha.-androstan-3.alpha.-ol-17-one	2.68	level2			305.246	212.6	POS	1.24675e+08	1.30648e+08	1.43587e+08	1.15913e+08	1.65988e+08	1.34306e+08	1.38837e+08	1.31877e+08	1.56529e+08	1.42756e+08	1.39033e+08	1.42758e+08	1.35558e+08	1.22727e+08	1.32834e+08	1.28133e+08	2.19368e+08	1.20835e+08	1.34058e+08	1.33691e+08	1.2337e+08	1.26675e+08	1.31824e+08	1.54041e+08	1.29522e+08	1.31003e+08	1.36419e+08	1.21906e+08
1H-Indole-6-carbonitrile	2.68	level2			141.045	210.7	NEG	1.70096e+06	1.75334e+06	2.01795e+06	1.65079e+06	1.55438e+06	1.95412e+06	2.31277e+06	2.57511e+06	2.30645e+06	2.05615e+06	1.55499e+06	1.76516e+06	1.90272e+06	1.408e+06	1.48717e+06	1.46073e+06	1.11215e+06	1.52696e+06	1.78485e+06	1.75891e+06	1.69375e+06	1.95035e+06	1.71151e+06	1.55575e+06	1.36541e+06	1.96819e+06	1.50622e+06	1.36174e+06
alpha-Cyperone	2.68	level2			219.173	206	POS	2.43579e+07	1.90253e+07	2.08626e+07	1.86051e+07	2.35282e+07	2.49862e+07	2.07413e+07	2.02869e+07	3.593e+07	2.18892e+07	2.23228e+07	2.09042e+07	1.88051e+07	1.77337e+07	1.94798e+07	1.75872e+07	1.43661e+07	1.43708e+07	1.64829e+07	1.98582e+07	1.71137e+07	1.47203e+07	1.68192e+07	1.97965e+07	2.67074e+07	1.92745e+07	1.91479e+07	1.91656e+07
(E)-3,10-Dihydroxy-4,9-dimethyldodec-6-enedioic acid	2.68	level2			287.149	190.8	NEG	2.71229e+09	2.72845e+09	2.82514e+09	2.58436e+09	2.34947e+09	2.85646e+09	2.56686e+09	2.5994e+09	2.73963e+09	2.61321e+09	2.71349e+09	2.50879e+09	2.98247e+09	3.56924e+09	2.97707e+09	2.78865e+09	2.77162e+09	3.13098e+09	2.50971e+09	2.36828e+09	2.41222e+09	2.86965e+09	2.55921e+09	2.57621e+09	2.70418e+09	2.66159e+09	2.74547e+09	2.63541e+09
Dolasetron	2.68	level2			325.153	186.1	POS	1.98296e+07	2.50138e+07	1.22075e+07	1.70473e+07	1.90756e+07	3.05554e+07	1.98207e+07	5.15133e+07	1.47485e+07	2.50749e+07	1.97667e+07	1.34597e+07	2.56911e+07	2.27466e+07	4.75208e+07	2.42671e+07	3.29845e+07	8.01013e+07	2.64764e+07	1.45717e+07	2.18341e+07	6.44703e+07	5.73199e+07	3.30212e+07	3.81999e+07	3.66436e+07	2.77607e+07	2.72321e+07
Ascaridole	2.68	level2			169.122	182.1	POS	4.68826e+06	5.42026e+06	9.062e+06	6.06921e+06	4.79571e+06	5.23893e+06	6.81364e+06	2.6727e+06	4.58309e+06	3.17076e+06	4.9718e+06	5.09352e+06	2.66131e+06	6.97882e+06	5.68121e+06	1.44943e+07	3.20237e+06	2.81729e+06	7.81203e+06	1.10129e+07	7.68074e+06	2.03016e+06	1.07751e+07	6.41712e+06	3.55008e+06	4.03803e+06	6.61937e+06	3.96785e+06
Flunixin	2.68	level2			295.071	182.1	NEG	6.90494e+06	4.81282e+06	4.46415e+06	4.50239e+06	6.24483e+06	6.03293e+06	5.1346e+06	1.18499e+07	5.6362e+06	5.73754e+06	6.80991e+06	4.71345e+06	1.07524e+07	1.21857e+07	7.89319e+06	1.40376e+07	1.26405e+07	1.12196e+07	4.42493e+06	2.89894e+06	6.69301e+06	9.50384e+06	7.45612e+06	3.71783e+06	7.00338e+06	7.39969e+06	6.89635e+06	7.03168e+06
4-Oxo-1,4-dihydro-3-quinolinecarboxylic acid	2.68	level2			188.035	181.9	NEG	5.85891e+06	5.3686e+06	7.21252e+06	5.78765e+06	5.59001e+06	5.4533e+06	6.90693e+06	7.15317e+06	7.50902e+06	7.52272e+06	6.60935e+06	6.31157e+06	8.25327e+06	1.0288e+07	7.35933e+06	7.08891e+06	7.35156e+06	7.25766e+06	9.63059e+06	1.00884e+07	9.26018e+06	7.21893e+06	7.00329e+06	7.60089e+06	6.82057e+06	7.44641e+06	6.95495e+06	6.42484e+06
Nifedipine	2.68	level2			345.108	181.8	NEG	2.62089e+07	3.57793e+07	2.39633e+07	2.89761e+07	2.22753e+07	2.64171e+07	3.13968e+07	2.6866e+07	2.90492e+07	2.68453e+07	3.4113e+07	2.49508e+07	2.75053e+07	2.55009e+07	2.54313e+07	2.81738e+07	2.73378e+07	2.82389e+07	2.1605e+07	1.7764e+07	1.57149e+07	2.40653e+07	1.98065e+07	1.93569e+07	2.40992e+07	2.97509e+07	2.41724e+07	2.4179e+07
(3-Amino-6-phenylthieno[2,3-b]pyridin-2-yl)(phenyl)methanone	2.68	level2			331.091	181.3	POS	2.09574e+06	3.00365e+06	3.73591e+06	2.57951e+06	2.84671e+06	2.65771e+06	3.24728e+06	3.07746e+06	3.33489e+06	3.36226e+06	3.11392e+06	3.15402e+06	3.41636e+06	3.26511e+06	2.82465e+06	2.22242e+06	2.39807e+06	2.65847e+06	2.98038e+06	3.15141e+06	2.6498e+06	3.24776e+06	3.21432e+06	3.16802e+06	3.11165e+06	2.91421e+06	2.7384e+06	3.14515e+06
Delphinidin 3-galactoside cation	2.68	level2			465.101	180.7	POS	3.79924e+06	4.49586e+06	2.72521e+06	3.90859e+06	5.03882e+06	4.04907e+06	6.25192e+06	6.7127e+06	3.8776e+06	6.52563e+06	9.20176e+06	4.35319e+06	4.157e+06	4.56175e+06	7.06202e+06	1.28679e+07	8.94363e+06	4.21038e+06	4.97326e+06	5.31648e+06	9.10288e+06	4.96776e+06	3.93246e+06	5.15921e+06	5.64865e+06	5.81091e+06	5.67889e+06	5.5453e+06
Ethyl 4-hydroxy-2-methyl-6-quinolinecarboxylate	2.68	level2			232.096	178	POS	2.24817e+07	2.26665e+07	2.346e+07	2.21249e+07	1.86594e+07	2.32802e+07	2.27699e+07	2.21012e+07	2.60553e+07	2.77791e+07	2.1571e+07	2.48009e+07	1.43699e+07	1.23223e+07	1.06279e+07	9.79238e+06	1.18596e+07	1.50106e+07	1.66325e+07	1.40443e+07	1.37092e+07	1.88282e+07	1.95356e+07	2.2118e+07	1.81263e+07	1.87965e+07	1.92315e+07	1.88873e+07
Octyl gallate	2.68	level2			281.138	175.2	NEG	1.82949e+07	1.44324e+07	2.10803e+07	1.9032e+07	1.79829e+07	1.65479e+07	2.33843e+07	1.7674e+07	2.61407e+07	2.62144e+07	2.06587e+07	2.54749e+07	2.10612e+07	1.93074e+07	2.54643e+07	2.56499e+07	1.98291e+07	1.81996e+07	2.6867e+07	2.71186e+07	2.39333e+07	1.81966e+07	1.95846e+07	2.04144e+07	2.11208e+07	2.00661e+07	2.20032e+07	2.15703e+07
Oxymatrine	2.68	level2			265.19	172.9	POS	6.29231e+07	4.79105e+07	3.49836e+07	4.00028e+07	1.53841e+08	5.78075e+07	3.08226e+07	4.546e+07	5.71725e+07	6.0326e+07	6.31219e+07	2.86633e+07	5.31685e+07	9.00363e+07	5.97839e+07	1.02024e+08	6.55431e+07	8.73508e+07	9.28645e+07	8.79352e+07	1.40715e+08	9.71852e+07	9.17446e+07	4.36913e+07	7.10938e+07	7.01383e+07	7.02557e+07	7.17338e+07
Isofraxidin	2.68	level2			223.059	172.2	POS	1.37366e+07	1.15304e+07	1.40658e+07	1.11173e+07	1.28254e+07	1.31342e+07	1.42498e+07	1.62877e+07	1.44138e+07	1.92292e+07	3.07077e+07	1.35335e+07	1.13889e+07	1.23807e+07	1.09429e+07	1.26997e+07	1.33305e+07	7.74552e+06	1.35179e+07	1.23673e+07	8.85272e+06	7.25148e+06	8.65129e+06	1.08478e+07	1.07736e+07	1.18175e+07	1.11069e+07	1.10217e+07
2,3-Dimethylbenzene-1-sulfonic acid	2.68	level2			185.027	169	NEG	0	645157	226167	743417	272485	581662	0	780501	284397	0	0	0	7.9293e+06	1.28804e+07	3.85108e+06	6.61395e+06	726638	1.77732e+07	0	0	0	3.63748e+06	170852	610483	1.06214e+06	1.6621e+06	1.82509e+06	1.05543e+06
7-Nitro-2,3,4,5-tetrahydro-1H-1-benzazepin-2-one	2.68	level2			207.076	166.7	POS	1.21898e+07	1.19677e+07	1.53873e+07	1.11314e+07	1.09571e+07	1.29625e+07	1.11361e+07	1.02456e+07	1.25077e+07	1.46967e+07	1.07126e+07	1.15568e+07	1.25111e+07	1.125e+07	1.26235e+07	1.37203e+07	1.13109e+07	1.81457e+07	1.45192e+07	1.52357e+07	1.63993e+07	1.54868e+07	1.36683e+07	1.25064e+07	1.13441e+07	1.42494e+07	1.14715e+07	1.15592e+07
Ethyl syringate	2.68	level2			225.076	158.6	NEG	1.15639e+07	1.14357e+07	1.07549e+07	1.22377e+07	1.13039e+07	1.1666e+07	1.10112e+07	9.18418e+06	1.114e+07	1.14306e+07	1.18832e+07	1.13436e+07	1.05489e+07	8.74687e+06	1.13539e+07	1.15237e+07	1.27834e+07	9.66885e+06	1.26813e+07	1.1589e+07	1.30191e+07	1.01053e+07	9.5897e+06	1.08047e+07	1.14744e+07	9.97286e+06	1.11348e+07	1.08508e+07
2,4,6-Trimethyl-4-phenyl-1,3-dioxane	2.68	level2			207.137	157.6	POS	1.57544e+08	1.64623e+08	1.84836e+08	1.46944e+08	1.68766e+08	1.85767e+08	1.64146e+08	1.01686e+08	2.03356e+08	1.7624e+08	1.66356e+08	1.71593e+08	1.502e+08	1.65623e+08	1.78775e+08	1.37429e+08	1.25104e+08	1.29295e+08	1.53456e+08	1.49231e+08	1.3387e+08	9.13203e+07	8.28213e+07	1.19972e+08	1.45769e+08	1.41549e+08	1.46328e+08	1.47833e+08
3-Hydroxyadamantan-1-carboxylic acid	2.68	level2			197.116	156.6	POS	2.47921e+07	2.61923e+07	2.6303e+07	2.27224e+07	2.50113e+07	2.84918e+07	2.44651e+07	2.12775e+07	2.15832e+07	2.20724e+07	2.3228e+07	2.52255e+07	3.70566e+07	3.64982e+07	3.5266e+07	4.13916e+07	3.26201e+07	3.28971e+07	7.39842e+07	4.62364e+07	4.3088e+07	5.37531e+07	4.50248e+07	2.95586e+07	3.04663e+07	3.00899e+07	3.26426e+07	3.1376e+07
N-[(3R)-Quinuclidin-3-yl]furo[2,3-c]pyridine-5-carboxamide	2.68	level2			272.138	156.3	POS	8.54116e+06	8.75704e+06	5.46783e+06	5.97847e+06	9.97748e+06	9.76444e+06	8.96745e+06	1.497e+07	7.03762e+06	1.05803e+07	1.08039e+07	7.13495e+06	1.13433e+07	1.18205e+07	1.6593e+07	1.42329e+07	1.42073e+07	1.73394e+07	1.48876e+07	1.37317e+07	1.74128e+07	1.90286e+07	1.70953e+07	1.10902e+07	1.16976e+07	1.25611e+07	1.20666e+07	1.14092e+07
4-(N-Methylacetamido)benzoic acid	2.68	level2			194.08	155	POS	2.75853e+07	3.17589e+07	2.07205e+07	3.13305e+07	1.66474e+07	3.17531e+07	9.82903e+06	1.16902e+07	8.8812e+06	1.11786e+07	9.68681e+06	8.62846e+06	8.47192e+06	8.27178e+06	1.03029e+07	9.57839e+06	9.30397e+06	1.04207e+07	1.09569e+07	1.67368e+07	9.44863e+06	1.18083e+07	1.17052e+07	1.14292e+07	1.40723e+07	1.33073e+07	1.3972e+07	1.38381e+07
5-(2-Hydroxyethyl)-6-methyl-2-phenyl-4(3H)-pyrimidinone	2.68	level2			231.112	154.3	POS	3.15479e+07	4.89999e+07	2.34906e+07	2.91546e+07	4.45209e+07	3.1521e+07	3.05663e+07	8.58025e+07	2.90213e+07	6.58972e+07	5.96532e+07	2.36904e+07	5.2849e+07	5.18359e+07	4.51853e+07	3.80995e+07	5.35696e+07	9.16831e+07	5.74536e+07	4.69885e+07	6.66797e+07	6.94333e+07	6.90771e+07	3.75458e+07	5.85466e+07	5.80289e+07	5.61075e+07	5.8082e+07
N-Acetyltyramine	2.68	level2			180.101	148	POS	5.65304e+06	6.34818e+06	4.4271e+06	3.94187e+06	6.15362e+06	5.43427e+06	7.9645e+06	1.4053e+07	8.24146e+06	5.93406e+06	1.42743e+07	9.51065e+06	4.83679e+06	6.85175e+06	7.37036e+06	6.12827e+06	4.94395e+06	6.53925e+06	4.76384e+06	4.72698e+06	4.1764e+06	4.19795e+06	4.08746e+06	4.57111e+06	5.4211e+06	5.79727e+06	3.10929e+06	5.55117e+06
3-Methyl-1-(2,4,6-trihydroxyphenyl)butan-1-one	2.68	level2			209.081	147.8	NEG	8.29436e+06	7.66188e+06	8.83452e+06	8.30684e+06	9.51246e+06	9.84309e+06	7.61296e+06	7.99282e+06	1.10945e+07	1.1102e+07	7.43836e+06	9.45813e+06	5.47192e+06	7.15338e+06	6.62375e+06	8.40595e+06	8.47432e+06	6.51054e+06	8.05819e+06	6.59328e+06	8.27382e+06	8.33421e+06	8.12342e+06	8.18355e+06	7.61484e+06	8.19699e+06	6.88729e+06	8.43143e+06
N-Benzyl-6,7-dimethoxy-4-quinazolinamine	2.68	level2			296.138	145.8	POS	5.22306e+06	5.31609e+06	5.18533e+06	5.36003e+06	4.71435e+06	5.00569e+06	4.80849e+06	7.23551e+06	4.62018e+06	6.53379e+06	5.30513e+06	4.09717e+06	6.80274e+06	6.69229e+06	5.15755e+06	6.45025e+06	8.63172e+06	7.6476e+06	4.07078e+06	4.09609e+06	6.63421e+06	6.59102e+06	6.14576e+06	4.83629e+06	5.60429e+06	4.54398e+06	5.85933e+06	5.67515e+06
2-Phenyl-5-pyrimidinecarboxylic acid	2.68	level2			201.065	143.4	POS	1.96537e+07	1.02685e+07	1.8516e+07	2.35396e+07	1.13037e+07	2.92866e+07	2.20703e+07	2.26785e+07	2.38276e+07	3.01818e+07	2.03705e+07	2.0739e+07	3.0526e+07	3.38171e+07	2.64278e+07	2.90815e+07	2.94413e+07	1.44613e+07	5.16321e+07	6.26643e+07	6.72301e+07	2.75486e+07	1.96413e+07	2.02745e+07	1.85587e+07	3.34868e+07	1.93435e+07	1.77811e+07
Mofebutazone	2.68	level2			233.128	142.4	POS	1.12649e+07	9.23073e+06	8.55745e+06	8.29276e+06	1.39524e+07	1.26404e+07	7.15175e+06	1.33457e+07	9.14218e+06	1.15774e+07	1.40458e+07	5.6567e+06	1.29984e+07	1.33898e+07	1.87157e+07	2.6339e+07	1.80318e+07	2.51265e+07	2.29559e+07	1.69869e+07	2.76943e+07	2.78257e+07	2.20786e+07	9.18805e+06	1.6407e+07	1.59476e+07	1.55451e+07	1.56505e+07
2-Hexylthiophene	2.68	level2			169.104	141.1	POS	2.39009e+07	2.48756e+07	2.32676e+07	1.08464e+07	3.83736e+07	2.20663e+07	2.1314e+07	8.07445e+07	2.66397e+07	4.39381e+07	4.71549e+07	1.42374e+07	1.01602e+08	9.83278e+07	9.17182e+07	1.25417e+08	1.26474e+08	2.07078e+08	9.54682e+07	5.28475e+07	9.44157e+07	1.25451e+08	1.39567e+08	3.56082e+07	6.12838e+07	8.76551e+07	8.38751e+07	6.63e+07
2,7-Diaminofluorene	2.68	level2			197.107	141.1	POS	2.21381e+07	4.53705e+07	3.3477e+06	2.51518e+07	3.33848e+07	1.69636e+07	1.21743e+07	1.37755e+07	1.35435e+07	1.48192e+07	1.75573e+07	4.37194e+06	1.69104e+07	1.00762e+07	1.55587e+07	1.57991e+07	1.90426e+07	1.22842e+07	2.84135e+07	9.17353e+06	3.10769e+07	6.15992e+06	8.90486e+06	1.87808e+07	1.88358e+07	2.15557e+07	2.35277e+07	2.32578e+07
4-({[4-(Diethylamino)phenyl]methylidene}amino)benzoic acid	2.68	level2			297.159	139.7	POS	1.27569e+07	1.38653e+07	9.50934e+06	9.46997e+06	1.32797e+07	9.42069e+06	2.43061e+07	1.58166e+07	1.4082e+07	1.27496e+07	1.64324e+07	1.68497e+07	1.80958e+07	2.76147e+07	1.65818e+07	1.73161e+07	1.88405e+07	1.89066e+07	9.14262e+06	6.23753e+06	6.04579e+06	1.59735e+07	1.19685e+07	9.81794e+06	1.25978e+07	1.35549e+07	1.4716e+07	1.37504e+07
2-(1H-Pyrrol-1-yl)benzoic acid	2.68	level2			188.07	135.7	POS	4.52813e+07	4.71839e+07	3.92863e+07	5.68827e+07	2.71698e+07	3.46957e+07	2.23038e+07	2.8656e+07	2.09748e+07	2.19493e+07	2.34918e+07	2.03842e+07	2.01988e+07	1.80386e+07	1.6074e+07	1.57406e+07	1.98465e+07	2.15611e+07	2.14246e+07	1.74133e+07	2.04184e+07	2.83373e+07	1.48833e+07	3.41102e+07	2.16045e+07	2.29109e+07	2.2518e+07	2.47663e+07
Quinolin-7-ol	2.68	level2			146.059	135.3	POS	5.52735e+07	4.36964e+07	5.86856e+07	5.12125e+07	5.40251e+07	4.08449e+07	4.92799e+07	5.4861e+07	4.79098e+07	5.09542e+07	5.34258e+07	5.09096e+07	3.39989e+08	1.09951e+08	2.13265e+08	2.69607e+08	1.92866e+08	2.98809e+08	8.35262e+07	1.29991e+08	6.37278e+07	9.49652e+07	5.86065e+07	1.12249e+08	6.76012e+07	9.03576e+07	1.45256e+08	9.75751e+07
2-(Piperidin-4-yloxy)-5-(trifluoromethyl)pyridine	2.68	level2			247.106	134.7	POS	8.50966e+07	6.57341e+07	6.76309e+07	8.45774e+07	5.29193e+07	6.76568e+07	5.42104e+07	6.29781e+07	7.89942e+07	6.64259e+07	5.4819e+07	7.15543e+07	3.61342e+07	3.38608e+07	2.99614e+07	2.89294e+07	4.072e+07	4.4408e+07	4.87894e+07	4.78832e+07	4.97459e+07	5.88858e+07	4.95547e+07	6.39455e+07	5.22675e+07	5.48658e+07	6.55069e+07	4.97145e+07
2-(Piperidin-1-yl)benzo[d]oxazole	2.68	level2			203.117	124.8	POS	2.55769e+07	2.98595e+07	2.70291e+07	2.37511e+07	2.83407e+07	3.31386e+07	2.89723e+07	2.23368e+07	3.33446e+07	3.12025e+07	2.47857e+07	3.02479e+07	5.16815e+06	3.31936e+07	3.54253e+07	2.06724e+07	3.04246e+07	2.6957e+07	4.01742e+07	4.42328e+07	4.15059e+07	3.36151e+07	2.87827e+07	3.48792e+07	3.11517e+07	2.82865e+07	3.45735e+07	2.982e+07
7-(Ethylamino)-6-methyl-4-(trifluoromethyl)-2H-chromen-2-one	2.68	level2			272.09	88.9	POS	9.06133e+06	7.14008e+06	6.97371e+06	5.63293e+06	7.83642e+06	6.19961e+06	8.23491e+06	1.00927e+07	9.53398e+06	1.07985e+07	1.16273e+07	7.66359e+06	4.38917e+06	8.18654e+06	7.11313e+06	2.33851e+06	7.74736e+06	1.0758e+07	5.46175e+06	4.12083e+06	5.37858e+06	1.28681e+07	7.59642e+06	7.36886e+06	8.6334e+06	2.87858e+06	2.12593e+06	4.9528e+06
3-Methyl-4-pentenoic acid	2.68	level2			113.06	59.3	NEG	1.90029e+07	1.71849e+07	1.69061e+07	1.42882e+07	1.57741e+07	2.35839e+07	1.48664e+07	1.6643e+07	1.46054e+07	1.86678e+07	2.10494e+07	1.20281e+07	1.33831e+07	1.58875e+07	1.46343e+07	1.22076e+07	1.0561e+07	2.00229e+07	1.42549e+07	1.17987e+07	1.62107e+07	1.30373e+07	9.42512e+06	9.17117e+06	1.55856e+07	1.47997e+07	1.36561e+07	1.44818e+07
1-Isonicotinoyl-4-piperidinylamine	2.68	level2			206.128	45	POS	6.44737e+06	4.13941e+06	4.01482e+06	3.98902e+06	5.32805e+06	6.79402e+06	5.70517e+06	1.12099e+07	3.6957e+06	5.45814e+06	7.00482e+06	1.63141e+06	1.05697e+07	1.25954e+07	1.24288e+07	1.37209e+07	1.10934e+07	2.32318e+07	5.30199e+06	3.57381e+06	6.47243e+06	1.60395e+07	1.25362e+07	6.87137e+06	9.35205e+06	8.45467e+06	1.0257e+07	8.61877e+06
1,5-Naphthalenediamine	2.68	level2			159.091	39.1	POS	7.0556e+08	8.54262e+08	3.08744e+08	3.62438e+08	6.93172e+08	8.2571e+08	2.27996e+08	2.50041e+08	7.02007e+08	2.59285e+08	6.7655e+08	2.52496e+08	2.99746e+08	5.79313e+08	2.11145e+08	5.37122e+08	6.16809e+08	6.38593e+08	6.70609e+08	5.28504e+08	5.45094e+08	2.11538e+08	3.43097e+08	2.05898e+08	3.34803e+08	2.97565e+08	6.90562e+08	6.71345e+08
Finasteridecarboxylic acid	2.68	level2			403.258	37.7	POS	6.15659e+06	6.25848e+06	6.1152e+06	4.43129e+06	3.26895e+06	5.1394e+06	3.42616e+06	2.75786e+06	6.33326e+06	3.13426e+06	7.13205e+06	3.60579e+06	2.4402e+06	2.20919e+06	3.20195e+06	1.57839e+06	2.91513e+06	3.76883e+06	1.98651e+06	5.39848e+06	3.64288e+06	2.68436e+06	1.96811e+06	1.92688e+06	3.73698e+06	3.42261e+06	4.66339e+06	3.37382e+06
1-Benzylpiperazine	2.68	level2			177.138	31.9	POS	3.44716e+09	4.88472e+09	3.95025e+09	3.52485e+09	3.4993e+09	5.05453e+09	3.03632e+09	2.64767e+09	4.11255e+09	3.21532e+09	3.10758e+09	2.50466e+09	2.74511e+09	1.92145e+09	2.82583e+09	3.06428e+09	3.27563e+09	2.6634e+09	3.32569e+09	3.4866e+09	3.83204e+09	2.95887e+09	3.00327e+09	3.1624e+09	3.0041e+09	3.05724e+09	3.28254e+09	3.09683e+09
4-Nitrobenzene-1,3-diol	2.68	level2			154.014	28.1	NEG	4.73034e+06	4.97956e+06	6.55395e+06	4.25062e+06	5.14771e+06	5.67946e+06	5.46885e+06	6.49653e+06	1.11524e+07	7.67284e+06	5.9912e+06	9.7735e+06	6.40371e+06	7.9605e+06	7.09325e+06	7.33831e+06	6.87239e+06	6.74554e+06	8.32113e+06	9.60321e+06	7.80838e+06	7.17472e+06	7.62673e+06	7.50315e+06	6.28902e+06	6.4278e+06	5.81898e+06	8.28034e+06
3-Methyl-2-pentenedioic acid	2.68	level2			143.034	28	NEG	5.14174e+06	5.74887e+06	5.40886e+06	4.04135e+06	4.80201e+06	5.49442e+06	5.04901e+06	5.14148e+06	5.33721e+06	6.37121e+06	5.29607e+06	5.18814e+06	5.68452e+06	5.29242e+06	6.29431e+06	5.53356e+06	5.64726e+06	5.71375e+06	5.79714e+06	6.45047e+06	6.05822e+06	4.94718e+06	4.89178e+06	6.17886e+06	4.4877e+06	5.69053e+06	5.38294e+06	5.56986e+06
Betonicine	2.68	level2			160.096	24.6	POS	7.96891e+06	6.47253e+06	7.6877e+06	6.68248e+06	4.21152e+06	7.25887e+06	8.30383e+06	7.75833e+06	8.35591e+06	6.88855e+06	1.00186e+07	8.97972e+06	6.76572e+06	3.63974e+06	3.98684e+06	4.45994e+06	3.18412e+06	7.32274e+06	2.96302e+06	2.64744e+06	3.16548e+06	4.44679e+06	2.8664e+06	6.2633e+06	3.36888e+06	5.44045e+06	6.12335e+06	6.45534e+06
2-[4-(Trifluoromethyl)phenyl]-1,3-thiazole-5-carboxylic acid	2.68	level2			274.013	24.5	POS	2.21141e+07	2.35441e+07	1.88346e+07	1.93907e+07	2.20356e+07	2.37796e+07	1.25987e+07	1.09794e+07	1.32385e+07	1.30421e+07	1.3968e+07	1.54903e+07	1.08949e+07	8.44363e+06	1.27394e+07	1.6246e+07	1.40179e+07	1.48954e+07	1.62554e+07	2.05789e+07	1.99466e+07	2.07963e+07	1.96912e+07	1.53221e+07	1.63543e+07	1.59615e+07	1.69608e+07	1.45262e+07
2-Chloro-1H-imidazole	2.68	level2			103.005	19.8	POS	2.95419e+07	3.31704e+07	2.92085e+07	3.03968e+07	2.70079e+07	3.3174e+07	2.55888e+07	2.47023e+07	2.71001e+07	2.11782e+07	2.81038e+07	2.37234e+07	2.29526e+07	2.32229e+07	2.05744e+07	1.8904e+07	2.21318e+07	2.30898e+07	1.80154e+07	2.36356e+07	2.15617e+07	1.72328e+07	1.58966e+07	1.67708e+07	2.18571e+07	2.10382e+07	2.00422e+07	2.40094e+07
Cotinine	2.68	level2			177.101	15.8	POS	6.11019e+07	5.43211e+07	4.43582e+07	4.64146e+07	4.92922e+07	4.30609e+07	5.73804e+07	4.73892e+07	4.56327e+07	4.87347e+07	4.64555e+07	5.64319e+07	5.02885e+07	3.82815e+07	4.70747e+07	4.63342e+07	5.2497e+07	5.183e+07	5.13549e+07	5.51673e+07	5.3374e+07	5.32356e+07	5.24733e+07	5.15808e+07	5.27697e+07	5.31162e+07	5.83334e+07	5.75181e+07
Oxalic acid	2.68	level2			88.9876	353.8	NEG	1.67058e+07	1.82431e+07	1.65022e+07	1.65244e+07	1.70405e+07	1.70587e+07	1.69774e+07	1.79614e+07	1.80754e+07	1.75611e+07	1.65139e+07	1.66665e+07	1.75276e+07	1.83349e+07	1.85924e+07	1.75422e+07	1.62213e+07	1.60231e+07	1.79956e+07	1.88295e+07	1.59305e+07	1.81314e+07	1.70087e+07	1.728e+07	2.23843e+07	1.64e+07	1.74576e+07	1.72163e+07
2,4,6-Trihydroxybenzoic acid	2.68	level2			169.014	56.5	NEG	1.6083e+06	6.43357e+06	1.12883e+06	6.47395e+06	4.41132e+06	1.65714e+06	4.54516e+06	3.60241e+06	3.25115e+06	6.57143e+06	1.09402e+07	2.46611e+06	4.67891e+06	2.68768e+06	4.18467e+06	1.44306e+07	1.02436e+07	2.07146e+06	2.46296e+06	1.13158e+06	2.81436e+06	8.91803e+06	1.52547e+06	1.11247e+07	5.4357e+06	5.01877e+06	4.37988e+06	4.7502e+06
Phthalic anhydride	2.67	level2			149.023	322.8	POS	6.32774e+07	6.01219e+07	6.4333e+07	1.34363e+08	1.38787e+08	6.50967e+07	6.82941e+07	6.60013e+07	1.56477e+08	6.83334e+07	6.77189e+07	1.43053e+08	6.36509e+07	7.56052e+07	5.50265e+07	5.96399e+07	6.29253e+07	5.47065e+07	1.11847e+08	6.3124e+07	5.67061e+07	6.31797e+07	6.34267e+07	6.2634e+07	5.6941e+07	6.23356e+07	6.78946e+07	6.39646e+07
(1S,4aR,5S)-5-[(E)-5-Methoxy-3-methyl-5-oxopent-3-enyl]-1,4a-dimethyl-6-methylidene-3,4,5,7,8,8a-hexahydro-2H-naphthalene-1-carboxylic acid	2.67	level2			347.224	308.8	NEG	2.85265e+06	2.93065e+06	2.93171e+06	2.80961e+06	2.92342e+06	2.49517e+06	2.4336e+06	2.76626e+06	3.18692e+06	3.58391e+06	3.03818e+06	2.31028e+06	5.08137e+06	4.57221e+06	3.18237e+06	3.61171e+06	2.91116e+06	4.21054e+06	3.92217e+06	3.37712e+06	2.59031e+06	4.97802e+06	3.19557e+06	5.20199e+06	3.47387e+06	3.72383e+06	3.72198e+06	2.86248e+06
9R,10S-EpOME	2.67	level2			319.225	306.4	POS	3.15734e+07	5.86988e+07	7.44848e+07	3.91309e+07	5.67655e+07	3.5228e+07	5.06216e+07	9.4078e+07	5.28349e+07	4.93256e+07	4.00035e+07	4.35503e+07	4.84124e+07	4.57874e+07	3.05671e+07	2.79793e+07	1.53459e+07	3.31958e+07	3.41549e+07	4.14741e+07	2.40769e+07	4.76729e+07	4.49948e+07	3.81473e+07	3.91767e+07	3.9155e+07	3.35813e+07	3.34373e+07
11-Deoxy-16,16-dimethylprostaglandin E2	2.67	level2			363.252	298.2	NEG	8.52608e+07	8.86704e+07	8.94045e+07	8.03938e+07	8.17141e+07	8.25701e+07	8.53176e+07	8.99074e+07	1.10155e+08	1.11782e+08	8.87332e+07	9.06303e+07	6.04225e+07	4.92119e+07	3.52066e+07	7.83643e+07	6.55728e+07	5.51656e+07	8.61074e+07	9.88916e+07	1.25237e+08	1.07457e+08	9.10371e+07	7.75151e+07	7.69132e+07	7.50025e+07	7.46467e+07	8.08264e+07
Buprofezin	2.67	level2			306.162	282.4	POS	4.76671e+06	6.11029e+06	5.29286e+06	5.4141e+06	7.52298e+06	5.73861e+06	6.39783e+06	8.88625e+06	6.11125e+06	7.01304e+06	6.48059e+06	6.76809e+06	2.76433e+07	3.7677e+07	6.08911e+07	3.50016e+07	3.78811e+07	3.03342e+07	2.28521e+07	2.10219e+07	2.40137e+07	1.69487e+07	1.85583e+07	4.12692e+07	1.56966e+07	1.67383e+07	1.53239e+07	1.55675e+07
Tsugaric acid A	2.67	level2			499.378	272.5	POS	1.84972e+06	2.87789e+06	2.74605e+06	2.63247e+06	1.47426e+06	2.47381e+06	1.64342e+06	1.62537e+06	922980	1.60354e+06	1.08983e+06	1.49582e+06	2.01133e+06	1.91387e+06	2.02819e+06	1.22942e+06	2.21163e+06	1.72572e+06	3.38622e+06	3.11238e+06	2.08497e+06	1.91525e+06	2.48819e+06	4.28554e+06	2.65879e+06	1.80637e+06	2.2801e+06	2.05919e+06
9,12-Octadecadiynoic acid	2.67	level2			275.2	266.5	NEG	4.594e+07	5.75228e+07	4.6236e+07	4.76661e+07	3.78724e+07	4.78317e+07	3.86054e+07	4.82211e+07	4.44544e+07	3.93914e+07	4.31891e+07	3.22233e+07	4.10512e+07	4.00669e+07	4.59995e+07	3.18746e+07	3.66954e+07	4.34389e+07	3.57865e+07	2.87885e+07	3.31162e+07	3.96213e+07	3.17079e+07	3.26485e+07	3.94756e+07	4.11613e+07	3.8652e+07	4.32845e+07
20-hydroxy_LTB4	2.67	level2			351.216	266.5	NEG	1.92755e+07	2.75574e+07	1.95716e+07	2.90484e+07	1.41685e+07	2.36396e+07	3.37399e+07	2.73797e+07	1.95378e+07	2.97593e+07	2.56254e+07	3.34701e+07	4.03304e+07	3.66716e+07	5.23994e+07	3.6076e+07	2.78081e+07	4.26499e+07	2.40355e+07	2.66295e+07	1.46953e+07	3.94458e+07	2.35057e+07	4.21528e+07	2.69851e+07	3.30148e+07	2.7064e+07	2.95258e+07
3-ketosphinganine	2.67	level2			300.288	258.1	POS	3.72251e+07	3.70046e+07	4.14665e+07	3.57966e+07	4.0867e+07	4.52454e+07	4.67138e+07	5.84921e+07	4.90401e+07	5.30722e+07	5.51272e+07	4.79164e+07	4.98344e+07	5.35915e+07	4.45158e+07	3.76915e+07	4.10134e+07	4.43558e+07	3.22522e+07	2.71536e+07	3.02918e+07	5.83902e+07	5.7655e+07	5.11432e+07	4.6751e+07	3.99882e+07	4.34682e+07	4.06204e+07
5-HpETE	2.67	level2			335.221	243	NEG	2.47428e+07	2.4578e+07	2.91544e+07	2.69914e+07	3.0576e+07	2.34465e+07	4.84953e+07	1.16474e+08	3.08982e+07	2.99684e+07	4.38019e+07	3.11464e+07	2.53198e+07	4.50007e+07	5.24093e+07	2.5822e+07	1.98569e+07	2.31798e+07	3.76761e+07	2.20479e+07	3.362e+07	3.67677e+07	4.01927e+07	2.59035e+07	2.58978e+07	4.58646e+07	2.61543e+07	2.6493e+07
2-tert-Butyl-4-methoxyphenol	2.67	level2			179.107	230	NEG	9.30681e+06	9.45198e+06	8.35001e+06	8.05024e+06	8.19179e+06	9.8876e+06	8.10441e+06	8.12624e+06	1.13362e+07	9.75352e+06	7.97756e+06	8.87567e+06	6.86407e+06	7.82355e+06	1.02061e+07	1.00833e+07	1.05304e+07	9.41486e+06	1.03668e+07	1.22736e+07	1.28849e+07	6.45369e+06	7.54807e+06	6.42621e+06	9.65254e+06	9.01983e+06	9.17901e+06	9.66462e+06
(2R)-Amino(4-hydroxyphenyl)ethanoic acid	2.67	level2			166.05	226.5	NEG	2.89053e+06	2.66694e+06	3.32402e+06	4.41921e+06	3.55666e+06	3.02605e+06	2.99171e+06	3.15461e+06	3.44841e+06	3.45004e+06	2.92597e+06	3.3954e+06	4.88595e+06	5.14164e+06	4.98478e+06	5.74804e+06	4.86106e+06	6.55682e+06	5.4988e+06	5.95409e+06	5.25705e+06	4.60955e+06	4.76718e+06	6.65237e+06	3.79625e+06	4.89579e+06	4.21218e+06	4.278e+06
DIHYDROJASMONIC_ACID	2.67	level2			211.133	219.7	NEG	1.80098e+07	2.16683e+07	2.07127e+07	1.61774e+07	2.0011e+07	2.08464e+07	1.92808e+07	1.80208e+07	2.17756e+07	1.99116e+07	1.79278e+07	1.63783e+07	1.77172e+07	2.16552e+07	2.3133e+07	2.09794e+07	1.84766e+07	1.89777e+07	1.97842e+07	2.19474e+07	2.61696e+07	1.52143e+07	1.56065e+07	1.53104e+07	1.82496e+07	1.92086e+07	1.81841e+07	1.9533e+07
Luteolin	2.67	level2			285.039	219.7	NEG	6.03427e+06	1.70779e+07	8.55157e+06	1.32054e+07	3.28852e+07	9.52199e+06	2.48058e+07	3.01612e+07	7.25751e+06	2.60942e+07	4.22699e+07	2.14643e+07	1.96431e+07	2.23566e+07	5.33045e+07	6.52471e+07	6.82988e+07	1.97041e+07	3.90433e+07	4.71418e+07	6.3238e+07	3.19931e+07	2.38824e+07	3.40352e+07	2.9366e+07	2.94384e+07	2.91521e+07	3.15288e+07
Coumarin 334	2.67	level2			284.127	218.3	POS	1.64991e+07	1.96135e+07	1.37967e+07	1.64064e+07	1.11961e+07	1.60592e+07	2.53218e+07	3.17535e+07	2.02361e+07	3.07341e+07	2.39699e+07	2.0473e+07	1.62434e+07	1.55272e+07	1.51626e+07	7.64428e+06	1.33656e+07	2.68144e+07	1.47433e+07	1.16539e+07	1.14271e+07	3.87888e+07	3.07278e+07	3.22983e+07	2.04502e+07	2.01845e+07	2.08108e+07	1.99073e+07
Rutaecarpine	2.67	level2			288.111	217.7	POS	5.67267e+06	3.80726e+06	4.2492e+06	2.95853e+06	5.1602e+06	5.86242e+06	6.59995e+06	1.3244e+07	5.23939e+06	9.59468e+06	6.91549e+06	6.82282e+06	1.04105e+07	9.91729e+06	8.08655e+06	1.14383e+07	1.10675e+07	1.20815e+07	1.98033e+07	1.33307e+07	1.37712e+07	1.63092e+07	1.36937e+07	4.88791e+06	8.53157e+06	9.28295e+06	9.44936e+06	9.47575e+06
4-(3-Formyl-2,5-dimethyl-1H-pyrrol-1-yl)benzoic acid	2.67	level2			242.081	211.7	NEG	6.49391e+06	7.29632e+06	7.01076e+06	6.60791e+06	5.79387e+06	6.93423e+06	7.66822e+06	7.04033e+06	7.90975e+06	7.09716e+06	8.65881e+06	6.99236e+06	6.83273e+06	6.75944e+06	6.72805e+06	5.07384e+06	6.89383e+06	7.10877e+06	7.84934e+06	6.51623e+06	5.40612e+06	7.81824e+06	8.65303e+06	8.34158e+06	6.59764e+06	6.71954e+06	6.84999e+06	6.90984e+06
2,3-Dihydro-1,4-benzodioxine-2-carboxylic acid	2.67	level2			179.034	210.5	NEG	837077	1.62413e+06	1.88427e+06	2.1421e+06	2.84563e+06	1.95977e+06	5.84071e+06	4.35703e+06	8.89702e+06	4.27317e+06	5.83478e+06	4.07785e+06	7.31201e+06	8.63244e+06	4.68217e+06	6.09078e+06	4.65104e+06	3.72998e+06	5.70766e+06	5.35134e+06	3.38395e+06	2.63563e+06	3.43014e+06	6.55852e+06	4.54662e+06	4.14836e+06	4.27891e+06	3.88695e+06
5-(3-Indolylmethylene)barbituric acid	2.67	level2			256.071	205.8	POS	3.75674e+07	3.34923e+07	3.5029e+07	3.55861e+07	2.50265e+07	3.3965e+07	2.91409e+07	3.48745e+07	3.51474e+07	3.63423e+07	2.7163e+07	2.7194e+07	2.02675e+07	1.85802e+07	1.05186e+07	9.51784e+06	1.4285e+07	2.12561e+07	1.72096e+07	1.41856e+07	1.33641e+07	1.71984e+07	1.78112e+07	1.91549e+07	2.50576e+07	2.43943e+07	2.37144e+07	2.54696e+07
C.I._Pigment_Red_149	2.67	level2			599.199	204.5	POS	0	235377	0	0	0	0	1.91438e+06	1.50153e+07	794000	6.37129e+06	4.29699e+06	1.12568e+06	2.10096e+06	451441	571936	710481	2.7094e+06	7.7818e+06	223220	0	648966	5.87387e+06	1.60761e+06	344515	1.51325e+06	731286	1.05349e+06	1.26111e+06
1-Hydroxy-N-(3-nitrophenyl)-2-naphthamide	2.67	level2			307.071	203.8	NEG	1.14112e+07	1.307e+07	9.18879e+06	1.45192e+07	8.44389e+06	1.06348e+07	7.45176e+06	6.16378e+06	1.06835e+07	7.0849e+06	7.81119e+06	6.63521e+06	5.54633e+06	6.01712e+06	5.53358e+06	5.54082e+06	5.80251e+06	5.28261e+06	5.61148e+06	4.54427e+06	4.61135e+06	5.81317e+06	6.06012e+06	6.57549e+06	7.46232e+06	7.42578e+06	5.64386e+06	6.08794e+06
Aminoglutethimide	2.67	level2			233.127	203.2	POS	6.70471e+06	5.81152e+06	5.06811e+06	6.31062e+06	3.21483e+06	5.11964e+06	4.41223e+06	3.60163e+06	5.55624e+06	5.5916e+06	4.46987e+06	4.70442e+06	4.94835e+06	7.36317e+06	2.56662e+06	3.91421e+06	3.20104e+06	5.10562e+06	1.75656e+06	815018	2.79553e+06	3.74519e+06	2.88833e+06	2.45011e+06	3.8337e+06	4.65003e+06	4.26421e+06	4.44468e+06
Sophocarpine	2.67	level2			247.179	203.2	POS	2.20385e+09	1.39827e+09	1.26482e+09	1.14255e+09	4.21731e+09	2.18997e+09	1.09363e+09	1.88833e+09	2.02489e+09	2.19313e+09	2.1649e+09	1.09342e+09	1.3089e+09	2.17809e+09	1.63049e+09	2.81875e+09	1.66792e+09	1.87594e+09	1.94089e+09	1.52358e+09	2.39395e+09	2.49556e+09	2.33296e+09	1.20353e+09	1.91204e+09	1.84565e+09	1.8783e+09	1.90417e+09
3,5-Bis(3-methoxyphenyl)-1H-pyrazole	2.67	level2			281.127	193.3	POS	6.99682e+07	4.92312e+07	3.87524e+07	3.86534e+07	4.72121e+07	6.39687e+07	6.06893e+07	1.37497e+08	4.89093e+07	7.92359e+07	4.98062e+07	3.40661e+07	8.88272e+07	1.04957e+08	9.23197e+07	8.39335e+07	1.04287e+08	1.84327e+08	3.98032e+07	4.23208e+07	5.87625e+07	1.62842e+08	1.17141e+08	6.35568e+07	7.51734e+07	7.59296e+07	7.53225e+07	7.36342e+07
2-Propyl-4-pentenoic acid	2.67	level2			141.091	186.7	NEG	3.43462e+06	3.79304e+06	3.69366e+06	2.96741e+06	2.53424e+06	3.37806e+06	5.29938e+06	4.09667e+06	5.58191e+06	5.66817e+06	4.64243e+06	5.09085e+06	4.03532e+06	6.32328e+06	5.26517e+06	5.33469e+06	4.62993e+06	4.22679e+06	3.713e+06	3.34587e+06	3.6793e+06	3.82198e+06	3.50929e+06	3.55134e+06	4.25199e+06	4.61679e+06	4.04222e+06	4.86143e+06
xi-2-Hexyl-5-methyl-3(2H)-furanone	2.67	level2			183.137	183.3	POS	7.01907e+06	7.85027e+06	9.30075e+06	7.75887e+06	9.60355e+06	8.17798e+06	1.0941e+07	7.49418e+06	1.21872e+07	1.05816e+07	1.15042e+07	1.04179e+07	1.00571e+07	1.18917e+07	1.0452e+07	9.0267e+06	9.12932e+06	8.50996e+06	8.51898e+06	7.91536e+06	6.79703e+06	6.91162e+06	6.0148e+06	8.37534e+06	8.53747e+06	9.38701e+06	9.83152e+06	9.16913e+06
Siduron	2.67	level2			233.164	178.2	POS	3.71917e+07	2.83651e+07	1.18252e+07	2.00673e+07	3.69869e+07	2.85971e+07	1.77927e+07	4.1386e+07	1.74072e+07	1.70426e+07	9.14407e+06	1.02409e+07	5.86157e+07	7.43193e+07	6.43267e+07	7.15991e+07	6.8219e+07	8.05462e+07	4.86212e+07	3.7121e+07	5.44953e+07	7.03892e+07	7.02746e+07	4.73808e+07	5.04906e+07	4.57771e+07	4.76043e+07	5.10085e+07
Cyclohexylamine	2.67	level2			100.112	176.8	POS	5.54606e+07	5.80366e+07	5.7045e+07	5.76978e+07	5.75962e+07	5.56907e+07	5.73324e+07	5.29786e+07	5.88374e+07	5.76302e+07	5.82832e+07	6.4894e+07	5.8829e+07	6.03585e+07	5.59781e+07	6.90659e+07	4.50592e+07	5.55393e+07	5.71746e+07	5.89471e+07	5.688e+07	6.44809e+07	5.68233e+07	5.78733e+07	2.84134e+07	5.7399e+07	5.82927e+07	5.56379e+07
Cubebininolide	2.67	level2			447.2	169.5	POS	3.79792e+06	3.40732e+06	3.34178e+06	2.52398e+06	3.66715e+06	3.28692e+06	3.07532e+06	4.47283e+06	3.21985e+06	2.42892e+06	2.90728e+06	3.99853e+06	4.36922e+06	4.67849e+06	5.71003e+06	4.15942e+06	5.11892e+06	8.28203e+06	4.83104e+06	5.14752e+06	5.83023e+06	9.76116e+06	7.04905e+06	4.71733e+06	3.57079e+06	4.54351e+06	4.61562e+06	4.50779e+06
Ramosetron	2.67	level2			280.143	168.2	POS	5.04038e+06	4.14456e+06	3.35537e+06	3.12128e+06	6.33691e+06	6.03929e+06	5.40636e+06	9.61268e+06	4.37609e+06	7.03406e+06	5.32206e+06	3.56482e+06	1.08239e+07	1.45554e+07	1.22579e+07	1.50769e+07	1.19737e+07	1.48486e+07	1.082e+07	8.72212e+06	1.26626e+07	1.34857e+07	1.21233e+07	7.40614e+06	8.20977e+06	8.34958e+06	8.66353e+06	8.59483e+06
Phomalone	2.67	level2			253.107	163.7	NEG	2.59172e+07	2.39411e+07	2.51824e+07	2.22749e+07	2.16141e+07	2.67235e+07	2.13628e+07	2.47769e+07	3.13006e+07	2.58607e+07	2.29926e+07	2.02172e+07	3.56744e+07	4.6292e+07	2.81634e+07	3.3968e+07	3.26262e+07	3.40361e+07	2.52815e+07	2.1675e+07	2.87882e+07	2.4095e+07	2.32598e+07	1.62963e+07	2.63143e+07	2.77256e+07	2.61775e+07	2.70136e+07
(2E,4E)-5-(3,8-Dihydroxy-1,5-dimethyl-7-oxo-6-oxabicyclo[3.2.1]octan-8-yl)-3-methylpenta-2,4-dienoic acid	2.67	level2			295.118	163	NEG	1.15191e+07	1.2755e+07	1.3562e+07	1.2025e+07	1.1291e+07	1.31723e+07	1.33333e+07	1.2732e+07	1.59844e+07	1.35285e+07	1.39445e+07	1.2795e+07	1.39032e+07	1.43104e+07	1.60889e+07	1.45094e+07	1.19372e+07	1.28565e+07	1.44662e+07	1.33519e+07	1.45836e+07	1.15264e+07	1.21602e+07	1.02595e+07	1.25793e+07	1.32858e+07	1.35071e+07	1.31919e+07
Fragransin_D1	2.67	level2			389.198	160.9	POS	9.14263e+06	8.09274e+06	4.28452e+06	6.30664e+06	5.88497e+06	6.4129e+06	2.08003e+07	5.58665e+07	6.46814e+06	2.1797e+07	2.32402e+07	4.47744e+06	3.40444e+07	3.36086e+07	9.26533e+06	2.47129e+07	3.12787e+07	2.23986e+07	2.5105e+06	2.50448e+06	7.44316e+06	1.67666e+07	1.00896e+07	7.10733e+06	1.52235e+07	1.50127e+07	1.39671e+07	1.47231e+07
Ethosuximide	2.67	level2			140.071	157.4	NEG	8.63474e+06	8.35476e+06	9.67486e+06	8.47312e+06	7.60014e+06	8.36492e+06	8.4153e+06	9.10607e+06	9.21575e+06	9.70656e+06	9.9649e+06	9.08541e+06	9.11935e+06	1.18675e+07	9.91643e+06	9.47322e+06	9.83166e+06	1.11599e+07	8.82142e+06	7.24891e+06	8.37477e+06	1.02792e+07	8.92055e+06	9.50605e+06	9.27277e+06	9.0826e+06	9.31401e+06	9.14281e+06
5-((1E,3E)-Hepta-1,3-dien-1-yl)-1,2,3-trihydroxycyclopentanecarboxylic acid	2.67	level2			255.123	157.2	NEG	2.58531e+07	2.36741e+07	2.46302e+07	2.36727e+07	2.14592e+07	2.88829e+07	2.3798e+07	2.18384e+07	3.47209e+07	2.57405e+07	2.24145e+07	2.28663e+07	3.27157e+07	3.41654e+07	2.34208e+07	2.1166e+07	2.47182e+07	2.85745e+07	2.29992e+07	2.0921e+07	2.97627e+07	1.81167e+07	2.13351e+07	1.79275e+07	2.48693e+07	2.4655e+07	2.5164e+07	2.47798e+07
N-(2-Hydroxy-4-nitrophenyl)-4-methoxybenzamide	2.67	level2			287.066	152.5	NEG	4.77012e+08	4.7611e+08	4.34104e+08	4.21048e+08	5.38889e+08	4.82273e+08	4.84224e+08	4.61588e+08	4.54748e+08	4.0228e+08	4.06408e+08	3.30317e+08	7.44483e+08	8.59508e+08	1.01194e+09	9.23929e+08	9.08833e+08	1.12331e+09	1.07825e+09	9.23181e+08	1.22344e+09	1.30292e+09	1.18027e+09	1.15593e+09	7.57254e+08	7.4387e+08	7.37505e+08	7.52995e+08
2-Amino-3-[4-(carboxymethyl)phenyl]propanoic acid	2.67	level2			222.076	150.8	NEG	3.19047e+07	4.00625e+07	2.96726e+07	3.73664e+07	2.22047e+07	3.04423e+07	2.83721e+07	3.58054e+07	4.34297e+07	3.0426e+07	3.01906e+07	2.50839e+07	1.48292e+07	1.2452e+07	1.57302e+07	1.05184e+07	2.05464e+07	1.92794e+07	1.99733e+07	1.59319e+07	1.91189e+07	3.52917e+07	3.25762e+07	3.54035e+07	2.46906e+07	2.80462e+07	3.03175e+07	2.41864e+07
.alpha.-Methyl-DL-phenylalanine	2.67	level2			178.086	147.1	NEG	1.01194e+06	1.87955e+06	2.15021e+06	2.16261e+06	1.40103e+06	389253	2.96101e+06	5.42749e+06	3.3401e+06	2.2271e+06	4.91687e+06	3.9252e+06	1.3463e+06	0	225762	230709	762516	424466	404413	784623	250976	664688	0	260486	1.10149e+06	1.48043e+06	1.28432e+06	1.22181e+06
5-[4-(Isopentyloxy)phenyl]-5-methyl-2,4-imidazolidinedione	2.67	level2			275.139	143.2	NEG	8.96842e+06	8.29605e+06	8.39392e+06	6.20724e+06	7.33344e+06	6.47289e+06	8.40537e+06	8.98383e+06	8.20329e+06	7.94843e+06	1.14128e+07	9.77859e+06	8.54278e+06	2.66858e+07	6.82123e+06	1.22729e+07	9.75389e+06	6.4305e+06	6.63123e+06	5.05868e+06	4.80546e+06	8.20356e+06	7.15932e+06	9.19043e+06	8.75943e+06	9.18224e+06	7.80032e+06	8.6389e+06
3-Piperidone	2.67	level2			100.075	135.2	POS	3.47244e+07	3.48968e+07	3.61124e+07	3.52693e+07	3.41141e+07	3.35189e+07	3.73559e+07	3.57942e+07	3.12164e+07	3.26151e+07	3.69902e+07	3.73432e+07	3.8163e+07	5.78201e+07	3.81648e+07	3.40012e+07	8.51019e+07	3.3e+07	3.83375e+07	4.14027e+07	3.92936e+07	4.00012e+07	4.96583e+07	3.72441e+07	3.86036e+07	3.96528e+07	4.02663e+07	3.83724e+07
Mephenytoin	2.67	level2			219.112	133.4	POS	1.23956e+07	8.50936e+06	8.6232e+06	7.14912e+06	1.08799e+07	1.17672e+07	9.44627e+06	1.45945e+07	8.62527e+06	1.14895e+07	1.02042e+07	7.84451e+06	1.18173e+07	1.3505e+07	1.53299e+07	1.51145e+07	1.67746e+07	2.31717e+07	2.65679e+07	1.3874e+07	1.71196e+07	2.20155e+07	1.64145e+07	1.05626e+07	1.47338e+07	1.21071e+07	1.52944e+07	1.29741e+07
2-Anilinopropanoic acid	2.67	level2			164.071	83	NEG	9.09961e+07	1.04387e+08	6.51548e+07	7.19445e+07	8.52394e+07	1.03448e+08	8.49441e+07	1.02821e+08	8.94221e+07	9.7231e+07	7.88394e+07	4.79571e+07	5.1794e+07	1.88052e+08	1.48111e+08	9.04774e+07	1.3644e+08	1.18808e+08	1.00238e+08	4.54451e+07	1.05928e+08	2.20515e+08	1.20385e+08	7.89001e+07	1.10701e+08	1.08542e+08	1.03987e+08	1.71896e+08
O-Acetylsalicylhydroxamic acid	2.67	level2			196.06	45.1	POS	3.39318e+06	5.06946e+06	5.96262e+06	2.8599e+06	2.93516e+06	1.79791e+06	1.26957e+07	4.03944e+06	9.75338e+06	1.38839e+07	9.48843e+06	1.27093e+07	2.90289e+06	2.76836e+06	2.14271e+06	8.5701e+06	5.22336e+06	7.32907e+06	3.36887e+06	1.17817e+07	4.54197e+06	4.88576e+06	5.82334e+06	8.88002e+06	4.0146e+06	5.36673e+06	5.43408e+06	9.54644e+06
6-(2-Thienyl)-2,4-hexadienoic acid isobutylamide	2.67	level2			250.125	39.1	POS	5.10719e+07	3.59585e+07	4.11939e+07	2.89779e+07	6.11966e+07	5.49949e+07	4.50495e+07	9.40785e+07	4.21608e+07	6.08691e+07	5.39668e+07	4.14508e+07	7.36812e+07	9.5655e+07	9.37343e+07	9.3604e+07	9.57143e+07	1.40465e+08	7.88483e+07	6.26093e+07	1.10636e+08	1.65075e+08	1.29225e+08	6.00731e+07	7.49209e+07	8.00149e+07	7.98631e+07	6.80036e+07
2-Hydroxy-N-(4-methylphenyl)-5-nitrobenzamide	2.67	level2			271.071	37.3	NEG	4.99631e+06	3.49538e+06	2.48763e+06	1.4953e+06	5.18962e+06	4.56113e+06	4.01652e+06	1.12402e+07	5.10226e+06	6.56765e+06	9.75561e+06	2.97401e+06	9.48956e+06	7.79089e+06	1.24973e+07	1.70381e+07	1.38387e+07	2.37233e+07	1.20092e+07	6.67009e+06	1.34648e+07	1.99029e+07	1.49227e+07	3.89799e+06	8.71279e+06	9.05472e+06	9.66683e+06	9.20616e+06
Clomiphene	2.67	level2			406.195	37.1	POS	459579	0	213402	985994	313019	0	1.54868e+06	1.07508e+07	1.20318e+06	3.32552e+06	4.99291e+06	1.23541e+06	1.3361e+06	1.19947e+06	1.61717e+06	1.78107e+06	1.49936e+06	3.94176e+06	747107	853359	3.21183e+06	8.40584e+06	4.20781e+06	1.76416e+06	1.81779e+06	1.58891e+06	1.48123e+06	1.97513e+06
2-Aminonaphthalene	2.67	level2			144.08	32.1	POS	2.63094e+08	2.78129e+08	2.36184e+08	2.26667e+08	2.41964e+08	2.41867e+08	2.9665e+08	2.83466e+08	2.76565e+08	2.82384e+08	2.8381e+08	2.58613e+08	3.08989e+08	3.10257e+08	3.2844e+08	2.81783e+08	3.01684e+08	2.77064e+08	3.10208e+08	3.37559e+08	2.99021e+08	2.99453e+08	3.26911e+08	3.16943e+08	2.96248e+08	2.83447e+08	2.96476e+08	2.80501e+08
2-Propylbenzimidazole	2.67	level2			161.107	31.8	POS	2.40354e+09	1.76607e+09	2.69623e+09	2.51506e+09	1.56677e+09	1.59515e+09	2.3637e+09	2.25658e+09	1.80366e+09	2.34592e+09	2.06087e+09	2.04409e+09	2.26632e+09	1.97336e+09	3.50275e+09	2.23284e+09	2.54276e+09	1.9106e+09	2.00654e+09	2.12162e+09	1.88682e+09	2.52904e+09	1.87408e+09	2.00754e+09	2.54313e+09	2.58212e+09	1.82093e+09	2.51302e+09
Gln-Arg	2.67	level2			301.164	31.3	NEG	9.71098e+06	1.25079e+07	1.18025e+07	9.40625e+06	1.29111e+07	9.57885e+06	1.23965e+07	9.92727e+06	1.53826e+07	2.27798e+07	1.53927e+07	1.46126e+07	6.76066e+06	6.48543e+06	5.98761e+06	4.72209e+06	4.94155e+06	2.86493e+06	8.98554e+06	1.13035e+07	9.39284e+06	5.57261e+06	7.5866e+06	5.96252e+06	8.94184e+06	9.33441e+06	1.40633e+07	1.0104e+07
1-(3-Phenylpropyl)piperazine	2.67	level2			205.169	29.5	POS	2.1037e+07	1.71128e+07	1.74525e+07	1.24011e+07	2.4336e+07	9.10333e+06	1.12491e+07	1.25134e+07	5.66098e+06	2.01686e+07	1.39642e+07	8.10513e+06	9.52854e+06	1.10352e+07	7.36172e+06	5.83749e+06	7.621e+06	9.15683e+06	1.02847e+07	1.38614e+07	1.1748e+07	9.58602e+06	1.19111e+07	1.22608e+07	1.26004e+07	1.48875e+07	1.34354e+07	1.02836e+07
DL-2-Methylglutamic acid	2.67	level2			160.061	26.7	NEG	2.44606e+07	2.80826e+07	2.38188e+07	2.2185e+07	2.23617e+07	2.77208e+07	2.00848e+07	1.9594e+07	2.05371e+07	2.42024e+07	1.89018e+07	2.23475e+07	1.82897e+07	1.79273e+07	1.85349e+07	2.40096e+07	2.15387e+07	2.26519e+07	2.63072e+07	2.70241e+07	2.80518e+07	2.02067e+07	2.01776e+07	2.31444e+07	1.96474e+07	2.25155e+07	2.11158e+07	2.31279e+07
5-Nitro-2-(2-pyridinyl)-1H-benzimidazole	2.67	level2			239.059	25.4	NEG	9.51381e+06	1.0268e+07	9.69962e+06	6.17516e+06	8.62245e+06	1.18209e+07	9.13939e+06	5.74772e+06	9.34547e+06	9.16418e+06	1.11325e+07	8.5716e+06	9.9358e+06	1.17537e+07	1.35857e+07	1.59959e+07	1.42887e+07	1.29219e+07	1.55779e+07	1.89314e+07	1.86127e+07	7.61559e+06	9.39635e+06	1.07118e+07	1.05749e+07	1.08593e+07	1.08874e+07	1.06687e+07
L-Ribulose	2.67	level2			149.045	24.7	NEG	6.39547e+07	6.685e+07	6.08551e+07	5.18453e+07	5.70827e+07	7.55828e+07	5.83683e+07	4.89058e+07	6.3367e+07	6.59346e+07	6.21826e+07	5.91125e+07	5.04046e+07	5.32236e+07	5.69882e+07	6.83272e+07	5.8955e+07	6.00356e+07	5.29264e+07	5.62939e+07	6.08845e+07	4.79376e+07	4.16611e+07	4.64745e+07	5.3489e+07	6.05126e+07	5.70481e+07	5.69756e+07
4-Methyl-N-(4-methyl-2-pyridinyl)benzenesulfonamide	2.67	level2			261.071	22.1	NEG	1.01365e+07	9.89299e+06	1.0029e+07	9.01472e+06	8.67598e+06	1.29003e+07	4.39444e+06	3.90431e+06	2.38416e+06	2.95566e+06	3.64009e+06	4.0656e+06	5.56499e+06	3.61224e+06	6.182e+06	8.43167e+06	8.67328e+06	7.35408e+06	7.57979e+06	7.38552e+06	8.14983e+06	7.6064e+06	6.75881e+06	5.78403e+06	7.13024e+06	6.64646e+06	6.51597e+06	6.67281e+06
2,6-Dimethoxy-4-propylphenol	2.67	level2			197.116	11.7	POS	1.55076e+07	9.22091e+06	1.53898e+07	8.78531e+06	1.51724e+07	7.44992e+06	1.61202e+07	1.49279e+07	4.5365e+06	1.48905e+07	1.49367e+07	7.52711e+06	1.58829e+07	1.06843e+07	9.82558e+06	1.5219e+07	1.60038e+07	8.56858e+06	1.70642e+07	8.68436e+06	1.68594e+07	1.73107e+07	1.60636e+07	1.62103e+07	1.62121e+07	1.67909e+07	1.49427e+07	1.60267e+07
Decenedioylcarnitine	2.67	level2			344.206	180.7	POS	2.65717e+07	3.30294e+07	2.76491e+07	3.2031e+07	2.6382e+07	3.14673e+07	3.2224e+07	3.69095e+07	3.39627e+07	3.32638e+07	2.95923e+07	2.7132e+07	3.57612e+07	2.75972e+07	3.64496e+07	2.82968e+07	3.31466e+07	3.24799e+07	2.08252e+07	1.62198e+07	1.99096e+07	3.62736e+07	2.73151e+07	2.98803e+07	2.94757e+07	2.88928e+07	2.88408e+07	2.9993e+07
N-benzoyl-L-aspartic acid	2.67	level2			236.056	102.3	NEG	9.03945e+07	8.13159e+07	5.72133e+07	8.55638e+07	6.08591e+07	3.17985e+07	7.4631e+07	8.8673e+07	8.35216e+07	7.10517e+07	9.65975e+07	8.39772e+07	6.40825e+07	9.25647e+07	7.58054e+07	4.9329e+07	8.2716e+07	7.27243e+07	7.71895e+07	1.11434e+08	9.54761e+07	7.06444e+07	1.17987e+08	6.97226e+07	8.24813e+07	9.03083e+07	8.80978e+07	8.84208e+07
(1(10)E,4E,6a,9b)-9-(2-Methylpropanoyloxy)-1(10),4,11(13)-germacratrien-12,6-olide	2.66	level2			319.19	359.7	POS	1.37695e+06	1.84979e+06	1.72795e+06	1.46214e+06	1.53204e+06	2.03038e+06	1.81434e+06	1.22436e+06	1.23621e+06	1.06741e+06	939996	1.40572e+06	1.5277e+06	1.95879e+06	2.32014e+06	1.57543e+06	2.15569e+06	1.45699e+06	2.00828e+06	1.54814e+06	1.61186e+06	1.06723e+06	1.32563e+06	1.22291e+06	1.69104e+06	1.79272e+06	1.49595e+06	1.17966e+06
Tripropylamine	2.66	level2			144.174	353.1	POS	734173	1.95004e+06	984735	990428	169800	1.11869e+06	1.36401e+06	485136	1.25322e+06	927308	875327	1.59759e+06	1.03927e+06	1.47271e+06	1.38385e+06	1.45059e+06	479725	935469	985316	1.70608e+06	429208	401318	131959	1.28526e+06	792744	710241	639542	507850
(Z)-6-Octadecenoic acid	2.66	level2			281.247	322.7	NEG	9.29522e+08	5.83963e+08	8.01806e+08	7.58775e+08	7.07446e+08	6.18861e+08	6.40096e+08	7.7899e+08	1.11876e+09	8.46805e+08	8.94572e+08	7.2742e+08	7.4422e+08	5.99978e+08	5.13297e+08	6.13436e+08	7.60137e+08	8.31035e+08	4.95694e+08	4.3305e+08	6.53774e+08	5.66208e+08	6.94586e+08	6.02774e+08	5.62766e+08	5.64069e+08	8.35919e+08	8.70889e+08
Docosanamide	2.66	level2			340.356	307.5	POS	985292	462299	791443	551933	352939	0	1.35136e+06	433649	0	1.93663e+06	933939	1.08665e+06	303523	0	680945	853478	600592	291239	0	399264	600796	0	1.5011e+06	432642	1.40871e+06	107627	1.07263e+06	793891
Rhodomyrtone	2.66	level2			441.226	301.5	NEG	3.49926e+06	3.10126e+06	3.0526e+06	1.8879e+06	3.52349e+06	4.60915e+06	2.03651e+06	2.11466e+06	2.69764e+06	3.60422e+06	3.16288e+06	1.93592e+06	3.26339e+06	3.09094e+06	7.31188e+06	5.66186e+06	5.09507e+06	7.74363e+06	7.03289e+06	8.28214e+06	8.04516e+06	6.53459e+06	4.86354e+06	3.60575e+06	4.77002e+06	4.28967e+06	4.41981e+06	4.61472e+06
Terfenadine	2.66	level2			472.319	297.6	POS	2.5283e+06	3.01864e+06	2.41815e+06	1.90538e+06	2.95377e+06	2.68672e+06	4.35913e+06	5.45534e+06	3.03309e+06	5.72203e+06	5.78207e+06	3.39762e+06	1.85056e+06	1.41693e+06	1.73778e+06	566455	946589	1.92625e+06	1.23129e+06	332553	421949	5.16116e+06	3.5623e+06	3.76461e+06	2.69858e+06	2.86568e+06	2.68201e+06	2.77504e+06
2-(Hexopyranosyloxy)-3-hydroxypropyl (7Z,10Z,13Z)-hexadeca-7,10,13-trienoate	2.66	level2			485.277	296.9	NEG	836418	1.10287e+06	944541	1.27345e+06	752577	980357	1.35175e+06	717459	1.35499e+06	985062	939287	1.07447e+06	5.27328e+06	5.03506e+06	1.97077e+06	3.10172e+06	2.68137e+06	3.43172e+06	4.78321e+06	1.80679e+06	1.5095e+06	3.75859e+06	1.67003e+06	4.4128e+06	1.65359e+06	1.71963e+06	1.62427e+06	1.69083e+06
Dihydroceramide	2.66	level2			330.299	289.7	POS	9.77876e+07	8.73862e+07	1.24152e+08	8.62317e+07	1.43937e+08	2.11753e+08	1.81541e+08	1.60547e+08	1.45851e+08	1.68809e+08	1.63289e+08	1.32228e+08	1.73496e+08	2.14676e+08	2.42735e+08	1.53475e+08	1.51106e+08	1.51168e+08	1.29524e+08	1.24679e+08	1.21559e+08	2.12633e+08	2.48039e+08	2.06603e+08	1.66221e+08	1.63639e+08	1.4919e+08	1.41472e+08
Stemphol	2.66	level2			235.169	281.7	NEG	1.45778e+07	2.44768e+07	1.32628e+07	1.48557e+07	2.22319e+07	1.64603e+07	1.1162e+07	1.22686e+07	1.25146e+07	1.46036e+07	1.16927e+07	2.24271e+07	1.50536e+07	1.59292e+07	1.83677e+07	1.57048e+07	1.35336e+07	1.41146e+07	1.96863e+07	2.10189e+07	2.98739e+07	1.55867e+07	2.0055e+07	1.36784e+07	1.49369e+07	1.5774e+07	2.4034e+07	2.27912e+07
11-Oxatetradecanoic acid	2.66	level2			229.18	281.1	NEG	2.41432e+07	1.59022e+07	2.07499e+07	1.45379e+07	3.07501e+07	3.349e+07	1.88373e+07	2.06665e+07	1.82194e+07	3.63033e+07	1.93663e+07	3.48472e+07	2.03306e+07	1.87196e+07	3.30989e+07	3.04923e+07	2.5702e+07	2.18026e+07	9.51819e+07	9.51033e+07	1.1725e+08	6.1102e+07	6.56034e+07	3.84338e+07	3.85333e+07	4.04754e+07	3.84154e+07	3.83103e+07
Leflunomide	2.66	level2			271.068	261.9	POS	0	0	0	909002	278208	0	428712	0	366036	0	323738	0	2.4551e+08	3.05263e+08	1.03618e+08	1.63464e+08	1.35772e+08	2.47018e+08	1.49992e+08	8.86027e+07	4.28487e+07	7.28989e+07	4.15307e+07	1.64191e+08	7.42193e+07	7.20749e+07	7.3276e+07	7.27869e+07
Hexaconazole	2.66	level2			314.081	260	POS	4.16649e+07	3.3901e+07	3.65356e+07	4.29403e+07	1.1653e+07	3.90202e+07	0	0	0	0	0	0	0	0	0	0	0	0	0	0	0	0	0	0	7.6712e+06	7.93546e+06	7.77102e+06	7.64635e+06
Lucidenic_acid_C	2.66	level2			477.283	256.7	POS	7.02694e+06	8.91446e+06	1.13865e+07	9.00318e+06	1.27613e+07	6.44379e+06	1.19824e+07	2.48901e+07	2.00235e+07	1.28266e+07	1.11576e+07	1.02226e+07	5.53127e+06	4.04193e+06	5.08028e+06	3.29194e+06	3.70293e+06	2.60035e+06	3.23114e+06	3.35515e+06	3.9705e+06	4.92914e+06	4.72209e+06	5.03789e+06	7.1296e+06	7.79538e+06	7.91758e+06	7.09288e+06
PC-M5'	2.66	level2			480.276	246.1	POS	1.06354e+06	1.1744e+06	690215	979528	1.57999e+06	720546	1.27085e+06	5.04767e+06	1.45033e+06	2.57823e+06	1.8883e+06	1.0812e+06	3.21497e+06	3.51514e+06	2.39864e+06	3.53714e+06	2.71235e+06	3.00383e+06	1.65885e+06	1.25443e+06	698486	3.4119e+06	2.91989e+06	1.59753e+06	2.08879e+06	2.09443e+06	1.87479e+06	1.49765e+06
1-(3,5-Dihydroxyphenyl)-12-hydroxytridecan-2-one	2.66	level2			321.206	245.5	NEG	1.47912e+07	3.11088e+07	2.80949e+07	3.164e+07	3.81272e+07	3.04094e+07	1.52209e+07	1.35156e+07	1.44526e+07	1.26679e+07	1.12726e+07	1.7674e+07	1.65244e+07	2.49986e+07	3.4217e+07	2.6739e+07	2.26094e+07	2.64366e+07	1.33937e+07	2.31643e+07	1.8696e+07	1.11547e+07	1.5846e+07	2.6156e+07	1.73654e+07	2.51828e+07	2.19459e+07	2.20554e+07
PGE3	2.66	level2			349.2	245.4	NEG	3.91379e+07	3.06013e+07	2.98615e+07	3.14292e+07	2.99378e+07	3.07603e+07	2.33147e+07	2.55294e+07	5.34698e+07	2.36808e+07	2.4551e+07	2.39098e+07	2.85274e+07	3.02958e+07	4.11595e+07	3.20182e+07	2.24306e+07	3.13963e+07	2.18939e+07	2.28291e+07	2.53923e+07	1.91465e+07	2.39065e+07	2.50708e+07	3.05803e+07	2.50292e+07	2.52945e+07	3.26075e+07
13,14-Dihydroprostaglandin F1.alpha.	2.66	level2			357.263	237	NEG	6.70142e+07	7.99075e+07	7.22818e+07	6.76248e+07	8.13853e+07	8.31903e+07	7.96127e+07	7.38089e+07	9.14532e+07	8.59442e+07	8.77024e+07	7.16437e+07	7.71026e+07	7.26218e+07	8.33662e+07	8.20311e+07	7.80091e+07	6.44906e+07	9.05891e+07	9.38902e+07	1.00892e+08	7.5501e+07	7.17779e+07	6.88832e+07	7.71899e+07	7.82815e+07	7.65791e+07	7.99718e+07
Aspterric acid	2.66	level2			265.143	236.9	NEG	2.46071e+07	3.12303e+07	2.54638e+07	2.8459e+07	3.00761e+07	2.39159e+07	2.17179e+07	2.05698e+07	3.10145e+07	3.06703e+07	2.51571e+07	2.46339e+07	9.16784e+06	1.03648e+07	1.64975e+07	1.25963e+07	1.44449e+07	1.00613e+07	2.0888e+07	2.45203e+07	1.57739e+07	3.29827e+07	1.13187e+07	9.15417e+06	1.91558e+07	1.9065e+07	2.017e+07	1.94589e+07
Pyocyanin	2.66	level2			211.085	229	POS	1.98557e+07	2.09638e+07	1.95571e+07	1.99322e+07	1.60609e+07	2.17217e+07	1.74467e+07	1.91007e+07	2.25576e+07	2.29354e+07	1.9975e+07	1.67936e+07	1.02944e+07	1.00434e+07	8.69936e+06	7.73426e+06	8.14839e+06	9.73013e+06	9.04956e+06	6.95832e+06	8.1928e+06	1.13068e+07	9.37688e+06	1.13194e+07	1.37371e+07	1.38376e+07	1.56535e+07	1.37054e+07
1-O-((3.alpha.,5.Xi.,9.Xi.,16.alpha.,18.Xi.)-16-Hydroxy-28-oxo-3-((4-O-.beta.-D-xylopyranosyl-.beta.-D-glucopyranuronosyl)oxy)olean-12-en-28-yl)-.beta.-D-glucopyranose	2.66	level2			941.472	223.6	NEG	900701	1.37199e+06	1.32381e+06	750397	1.54424e+06	1.24505e+06	1.72185e+06	1.59905e+06	2.89431e+06	1.80725e+06	2.4349e+06	1.6414e+06	971052	688127	702957	416733	658343	494177	419310	81924.6	494548	364343	463374	271874	633564	685357	1.10528e+06	961865
3,5-Di-tert-butyl-4-hydroxybenzoic acid	2.66	level2			249.148	223	NEG	1.23882e+07	1.48332e+07	1.48728e+07	1.23783e+07	1.43442e+07	1.40384e+07	1.64163e+07	1.5019e+07	1.67079e+07	2.0046e+07	1.57469e+07	1.74177e+07	1.4033e+07	1.62916e+07	2.00045e+07	1.62632e+07	1.45479e+07	1.46648e+07	2.02983e+07	2.06361e+07	1.81292e+07	1.7433e+07	2.02505e+07	1.9074e+07	1.52803e+07	1.60949e+07	1.56475e+07	1.62627e+07
8-iso-15-keto-PGE2	2.66	level2			349.2	221.1	NEG	9.33883e+06	1.17093e+07	1.34305e+07	5.84479e+06	1.53901e+07	1.04511e+07	9.76751e+06	9.93624e+06	1.02905e+07	9.97373e+06	1.03656e+07	1.0789e+07	1.18632e+07	1.28243e+07	1.22775e+07	1.35728e+07	8.63682e+06	6.31941e+06	1.01904e+07	9.95738e+06	9.57394e+06	8.66256e+06	8.96817e+06	1.25731e+07	1.17071e+07	1.05114e+07	1.00954e+07	1.13508e+07
Ropinirole	2.66	level2			261.195	219.1	POS	4.96291e+07	5.32972e+07	3.65545e+07	3.28203e+07	7.26719e+07	4.36786e+07	3.17636e+07	3.92955e+07	2.09051e+07	5.26669e+07	2.76216e+07	3.22004e+07	3.41728e+07	6.1327e+07	4.08146e+07	5.70957e+07	4.18682e+07	8.14284e+07	4.11081e+07	4.1848e+07	6.66616e+07	6.22757e+07	4.27263e+07	1.57875e+07	7.23238e+07	7.18834e+07	7.31296e+07	7.27687e+07
(5S)-1,2,3,4,5,6,7,8,9,10-Decahydro-5,9-methanobenzo[8]annulen-11-one	2.66	level2			191.142	206.5	POS	1.89284e+08	2.1737e+08	2.20856e+08	2.54201e+08	3.01885e+08	2.27352e+08	2.07992e+08	1.36733e+08	2.20995e+08	2.0154e+08	2.28612e+08	2.05749e+08	2.16699e+08	2.14057e+08	2.99795e+08	3.07032e+08	2.79883e+08	1.82066e+08	2.716e+08	3.04989e+08	2.8352e+08	2.01503e+08	1.74244e+08	2.24462e+08	2.09491e+08	2.25126e+08	2.20228e+08	2.23955e+08
2,4,6-Trimethylphenol	2.66	level2			137.095	206.1	POS	3.57997e+07	5.24115e+07	4.25211e+07	3.74337e+07	5.05134e+07	5.78788e+07	4.20647e+07	2.46563e+07	5.61058e+07	3.80074e+07	7.20917e+07	6.97618e+07	5.49905e+07	4.03083e+07	6.38312e+07	6.65356e+07	5.84003e+07	3.40083e+07	1.04814e+08	1.24525e+08	1.08254e+08	3.50219e+07	3.32455e+07	5.40001e+07	5.33001e+07	4.62729e+07	5.73416e+07	5.8282e+07
3-[(5,6-Diphenylfuro[2,3-d]pyrimidin-4-yl)amino]-1-propanol	2.66	level2			346.153	204.7	POS	9.78636e+06	7.49623e+06	4.87209e+06	3.79179e+06	7.65984e+06	9.11147e+06	9.68293e+06	2.73866e+07	1.2449e+07	1.37265e+07	1.44273e+07	7.51067e+06	1.11208e+07	5.82689e+06	9.75295e+06	8.90132e+06	9.99182e+06	1.69165e+07	1.6538e+07	1.03055e+07	8.68254e+06	2.76701e+07	1.8424e+07	7.07561e+06	1.1758e+07	1.16162e+07	1.14787e+07	1.1589e+07
3-[(1E,3E)-Hepta-1,3-dienyl]pentanedioic acid	2.66	level2			225.112	198.4	NEG	2.74256e+07	2.88262e+07	2.92059e+07	3.17464e+07	2.83915e+07	3.04804e+07	2.9104e+07	2.77042e+07	3.35592e+07	3.15134e+07	3.36585e+07	2.88408e+07	3.06903e+07	3.75457e+07	3.55525e+07	3.17849e+07	3.25251e+07	3.32972e+07	2.91086e+07	2.89425e+07	3.12213e+07	2.76303e+07	2.60428e+07	2.48148e+07	2.87589e+07	2.75584e+07	3.01946e+07	3.00822e+07
Dothiepin	2.66	level2			296.148	197.6	POS	9.8521e+06	9.73075e+06	1.1676e+07	9.24934e+06	8.39687e+06	1.76944e+07	3.25094e+06	5.62118e+06	4.07654e+06	4.88067e+06	4.0957e+06	3.17717e+06	5.30627e+07	6.66673e+07	3.81931e+07	4.15303e+07	4.48629e+07	5.17596e+07	3.31529e+07	2.98292e+07	2.28803e+07	1.9143e+07	1.12382e+07	2.41067e+07	2.15875e+07	2.22266e+07	2.02276e+07	2.32071e+07
4'-Ethenyl-2'-hydroxy-1,4',4a-trimethyl-5-oxospiro[2,3,4,7,8,8a-hexahydronaphthalene-6,1'-cyclopentane]-1-carboxylic acid	2.66	level2			335.221	194	POS	1.34646e+07	1.61169e+07	1.59161e+07	1.98389e+07	1.94893e+07	1.58374e+07	1.32309e+07	1.35794e+07	1.39246e+07	1.21571e+07	1.19345e+07	1.49642e+07	1.40047e+07	1.51458e+07	1.56898e+07	1.40355e+07	1.15296e+07	1.23612e+07	1.25011e+07	1.27957e+07	1.0411e+07	9.73018e+06	1.04375e+07	1.58612e+07	1.37143e+07	1.39471e+07	1.3226e+07	1.40604e+07
2,6-Dimethyl-1,4-benzenediol	2.66	level2			139.075	190.6	POS	1.80985e+06	1.79972e+06	1.80986e+06	1.50806e+06	1.38669e+06	1.98298e+06	2.08107e+06	1.85327e+06	2.29125e+06	1.52271e+06	2.08155e+06	2.02905e+06	2.29359e+06	2.34471e+06	1.96801e+06	1.42314e+06	2.02082e+06	1.391e+06	2.00466e+06	1.75384e+06	1.55831e+06	1.49446e+06	1.97194e+06	1.95628e+06	1.29346e+06	1.67467e+06	1.91318e+06	2.08588e+06
2,2'-Bipyridine-3,3'-diol	2.66	level2			187.05	188.1	NEG	5.18239e+07	4.61016e+07	4.82623e+07	5.05535e+07	3.69251e+07	4.74155e+07	4.91467e+07	5.74344e+07	6.53287e+07	6.63886e+07	4.6831e+07	5.49272e+07	4.50422e+07	4.2179e+07	2.25062e+07	2.23016e+07	2.90733e+07	4.06554e+07	4.08772e+07	3.84924e+07	3.49189e+07	3.08099e+07	3.80267e+07	3.75108e+07	4.37755e+07	4.16605e+07	4.4087e+07	4.3439e+07
Luteolin 7-glucoside	2.66	level2			449.106	188	POS	2.86404e+06	4.05714e+06	1.6983e+06	2.58835e+06	5.49013e+06	4.11333e+06	3.59691e+06	3.07199e+06	1.06217e+06	2.92333e+06	3.64831e+06	2.05186e+06	2.84258e+06	3.93327e+06	5.9877e+06	1.03367e+07	9.91313e+06	3.82832e+06	5.75898e+06	6.40815e+06	1.07314e+07	5.93105e+06	5.73535e+06	5.36375e+06	4.29147e+06	4.68752e+06	4.92688e+06	5.12892e+06
3,7,8,2'-Tetrahydroxyflavone	2.66	level2			287.053	187.3	POS	5.94747e+06	7.93633e+06	3.57912e+06	5.14456e+06	1.20119e+07	9.04154e+06	7.71886e+06	6.90026e+06	2.48376e+06	6.19256e+06	7.62941e+06	4.68419e+06	6.14944e+06	8.90423e+06	1.40926e+07	2.28683e+07	2.30829e+07	8.56532e+06	1.28753e+07	1.42491e+07	2.39869e+07	1.23914e+07	1.19785e+07	1.07023e+07	9.64919e+06	1.08105e+07	1.06455e+07	9.71759e+06
Fludrocortisone	2.66	level2			421.205	186.7	NEG	4.35211e+07	4.22662e+07	4.63859e+07	3.08213e+07	4.35269e+07	5.09649e+07	4.64377e+07	3.79635e+07	4.47109e+07	4.746e+07	4.93135e+07	3.92358e+07	4.72319e+07	6.40853e+07	5.82077e+07	6.0397e+07	5.26221e+07	5.1079e+07	5.53143e+07	5.70921e+07	1.02767e+08	4.3247e+07	3.22096e+07	3.87909e+07	4.69124e+07	4.47511e+07	4.4355e+07	4.46962e+07
4-Nitro-N-(1-phenylethyl)benzamide	2.66	level2			271.106	183.9	POS	8.19318e+06	7.76893e+06	1.04801e+07	6.94193e+06	6.525e+06	8.72541e+06	8.49368e+06	1.29751e+07	9.09714e+06	1.39382e+07	8.23535e+06	1.1208e+07	2.28625e+06	6.7649e+06	6.67299e+06	4.11631e+06	6.96301e+06	6.78785e+06	1.06534e+07	6.27647e+06	1.09833e+07	1.17826e+07	1.15014e+07	2.61431e+07	8.15764e+06	8.28009e+06	8.00155e+06	7.67021e+06
5,7,3',4',5'-Pentahydroxyflavone	2.66	level2			303.048	180.7	POS	8.71168e+06	9.57107e+06	6.63721e+06	7.96991e+06	1.21502e+07	8.41928e+06	1.41218e+07	1.30229e+07	8.06869e+06	1.50606e+07	1.98385e+07	1.04636e+07	8.60788e+06	1.01422e+07	1.6648e+07	2.98558e+07	2.14615e+07	9.64645e+06	1.17936e+07	1.2551e+07	2.23066e+07	9.40819e+06	8.13241e+06	1.09875e+07	1.18039e+07	1.30006e+07	1.27151e+07	1.32132e+07
3,5-Dimethoxy-N-4-pyridinylbenzamide	2.66	level2			259.107	180.2	POS	1.0259e+07	1.29101e+07	1.12591e+07	1.26425e+07	8.7616e+06	1.1023e+07	2.85867e+07	1.64938e+07	1.49169e+07	1.7551e+07	2.06589e+07	1.78525e+07	1.10071e+07	7.72423e+06	7.71905e+06	4.51451e+06	8.29281e+06	9.73923e+06	1.04099e+07	5.84796e+06	5.70666e+06	2.17759e+07	1.45929e+07	2.23026e+07	1.96382e+07	1.2168e+07	1.18453e+07	1.25911e+07
4,4-Dimethyl-1,3-cyclohexanedione	2.66	level2			139.076	177.5	NEG	8.51365e+06	8.66746e+06	8.49557e+06	1.18534e+07	1.56923e+07	1.3055e+07	1.09059e+07	9.02164e+06	1.34822e+07	1.48215e+07	1.07754e+07	1.06004e+07	1.05905e+07	1.06169e+07	1.24652e+07	1.29495e+07	1.30002e+07	1.01726e+07	1.24759e+07	1.13716e+07	1.00983e+07	1.37299e+07	1.12611e+07	1.21718e+07	1.08252e+07	1.10547e+07	1.11028e+07	1.16262e+07
5-Hexyl-2,4-dihydroxybenzaldehyde	2.66	level2			221.117	174.9	NEG	2.29943e+07	2.80388e+07	3.0772e+07	2.40698e+07	3.05802e+07	2.83705e+07	3.3681e+07	2.21953e+07	3.53781e+07	3.5262e+07	3.33728e+07	3.86625e+07	2.81295e+07	2.83842e+07	3.93315e+07	2.98729e+07	2.68565e+07	2.07568e+07	3.71928e+07	4.21504e+07	3.80236e+07	2.37459e+07	2.50295e+07	2.83688e+07	2.97286e+07	3.14554e+07	2.95171e+07	3.17974e+07
7-Keto-8-aminopelargonic acid	2.66	level2			186.113	171.6	NEG	7.47728e+06	1.01815e+07	6.67071e+06	8.25876e+06	7.89323e+06	7.7738e+06	1.25033e+07	1.16615e+07	1.57849e+07	1.45812e+07	9.06612e+06	1.0626e+07	7.03891e+06	1.06047e+07	1.1458e+07	7.98196e+06	9.48638e+06	6.45175e+06	9.67361e+06	9.53284e+06	8.54879e+06	8.25498e+06	6.25409e+06	6.55717e+06	8.4829e+06	8.23499e+06	9.1775e+06	8.75939e+06
Isomitraphylline	2.66	level2			369.179	171.4	POS	6.285e+07	6.02667e+07	6.06774e+07	6.35289e+07	6.43395e+07	7.46611e+07	2.7222e+07	2.28269e+07	2.32585e+07	2.54194e+07	2.50218e+07	2.10667e+07	3.99275e+07	3.19633e+07	6.42159e+07	6.3404e+07	5.80526e+07	6.18741e+07	7.1415e+07	8.00348e+07	7.77361e+07	4.97651e+07	4.49946e+07	6.85638e+07	5.11709e+07	5.21282e+07	5.24224e+07	4.87971e+07
4-Phenyl-3-(trifluoromethyl)-1H-pyrazole	2.66	level2			211.05	169.9	NEG	6.17916e+07	5.69613e+07	6.96133e+07	5.30329e+07	5.26568e+07	6.12755e+07	4.88138e+07	5.72591e+07	7.91784e+07	7.44601e+07	6.68543e+07	6.14585e+07	3.32691e+07	2.42062e+07	2.2336e+07	1.89746e+07	2.50248e+07	3.09544e+07	2.93114e+07	2.64891e+07	3.10277e+07	2.96156e+07	3.51097e+07	3.02788e+07	4.01288e+07	4.33677e+07	4.51667e+07	4.32962e+07
Meclizine	2.66	level2			391.195	161.2	POS	3.71681e+06	1.95548e+06	1.23878e+06	1.23799e+06	851648	2.6396e+06	4.56106e+06	1.49112e+07	1.74171e+06	5.31336e+06	6.36033e+06	474240	1.05515e+07	1.07962e+07	2.86462e+06	6.71895e+06	9.23868e+06	6.50826e+06	3.57157e+06	915874	2.49276e+06	3.70045e+06	3.46262e+06	1.85401e+06	4.26031e+06	3.75169e+06	3.61054e+06	3.0146e+06
Atropic acid	2.66	level2			147.044	159.9	NEG	4.62086e+07	4.17284e+07	3.62999e+07	4.23717e+07	3.63346e+07	4.34822e+07	3.62551e+07	4.02756e+07	2.97396e+07	4.55251e+07	2.71858e+07	4.3193e+07	2.75564e+07	2.0958e+07	3.33405e+07	2.54321e+07	3.75507e+07	4.46676e+07	4.85975e+07	4.12775e+07	5.11218e+07	5.30469e+07	5.33684e+07	4.17452e+07	3.84792e+07	3.7352e+07	3.70366e+07	3.73275e+07
3(2H)-Pyridazinone, 6-(4-methoxyphenyl)-	2.66	level2			203.081	157.4	POS	1.18353e+07	1.16403e+07	1.03914e+07	8.22139e+06	8.03471e+06	7.45659e+06	1.21726e+07	1.46536e+07	1.85027e+07	1.71978e+07	1.40899e+07	1.67909e+07	9.27394e+06	9.80194e+06	5.34867e+06	1.59895e+07	1.5008e+07	1.18273e+07	1.43393e+07	2.10324e+07	3.93013e+07	1.1942e+07	1.24711e+07	8.82442e+06	1.03933e+07	1.05151e+07	1.1798e+07	1.18722e+07
8-Hydroxy-5-[1-hydroxy-2-(isopropylamino)butyl]-2(1H)-quinolinone	2.66	level2			291.169	156.3	POS	261528	1.38673e+06	0	617613	2.28834e+06	430544	0	2.71509e+06	247086	656524	769186	468092	9.79715e+06	1.60403e+07	1.17295e+06	9.55361e+06	9.77159e+06	7.45159e+06	6.452e+06	4.91553e+06	6.02442e+06	8.11102e+06	6.64843e+06	5.90042e+06	1.17257e+06	3.13795e+06	2.44341e+06	3.78776e+06
Ethyl gallate	2.66	level2			197.044	155.9	NEG	1.93324e+07	2.4352e+07	2.12918e+07	2.04428e+07	2.64082e+07	2.07906e+07	2.46742e+07	2.40971e+07	2.07803e+07	2.28062e+07	3.41739e+07	2.4107e+07	3.04938e+07	3.11572e+07	3.77146e+07	3.74231e+07	3.74782e+07	2.97345e+07	2.25404e+07	2.0476e+07	2.05399e+07	2.62362e+07	2.37289e+07	2.73059e+07	2.67447e+07	2.6169e+07	2.71391e+07	2.63633e+07
N-Benzylglycine	2.66	level2			166.085	154.9	POS	2.04031e+07	3.17816e+07	1.76165e+08	2.68762e+07	2.06035e+07	2.02302e+08	2.80354e+07	3.52913e+07	2.40456e+07	2.9174e+07	1.01928e+08	1.5785e+08	1.89692e+07	4.36641e+07	2.16424e+07	2.66378e+07	1.398e+07	3.7742e+07	1.78528e+07	2.43009e+07	3.4379e+07	3.61668e+07	2.25441e+08	2.07568e+08	2.03121e+08	2.39929e+07	2.04043e+08	2.07067e+08
1(6H)-Pyridazinebutanoic acid, 6-imino-3-(4-methoxyphenyl)-	2.66	level2			288.133	154	POS	5.60561e+07	6.21896e+07	5.49449e+07	7.83151e+07	5.31523e+07	6.26013e+07	4.85944e+07	5.46947e+07	5.74565e+07	5.75883e+07	4.92344e+07	4.5956e+07	2.88616e+07	1.6813e+07	1.47331e+07	2.18504e+07	3.03497e+07	2.56794e+07	1.72303e+07	1.3639e+07	1.4333e+07	2.40986e+07	2.50318e+07	3.38743e+07	3.94217e+07	4.36258e+07	3.74791e+07	3.96772e+07
4-(1-Pyrazolyl)benzaldehyde	2.66	level2			173.07	152.8	POS	7.77093e+07	7.76978e+07	7.54803e+07	6.09999e+07	6.43758e+07	8.23513e+07	7.33742e+07	7.47994e+07	9.26536e+07	8.59153e+07	7.83019e+07	7.00882e+07	8.80655e+07	8.34991e+07	9.23758e+07	8.1623e+07	9.27551e+07	9.52668e+07	8.9347e+07	8.9697e+07	8.95795e+07	7.96676e+07	7.53211e+07	7.76332e+07	7.84431e+07	8.24529e+07	7.85454e+07	7.91968e+07
2-(1,3-Dioxo-1,3-dihydro-2H-isoindol-2-yl)butanoic acid	2.66	level2			234.075	150	POS	4.71292e+07	5.2241e+07	4.74739e+07	4.60796e+07	3.63488e+07	3.76938e+07	6.72607e+07	6.86506e+07	6.26828e+07	5.96101e+07	5.5175e+07	6.27434e+07	6.99529e+07	7.91807e+07	6.19532e+07	5.29032e+07	7.09738e+07	7.85197e+07	7.1412e+07	6.48812e+07	6.83114e+07	8.31071e+07	8.60517e+07	9.69683e+07	6.0209e+07	6.3946e+07	6.30135e+07	6.33005e+07
5-Amino-3-methyl-1-(p-tolyl)pyrazole	2.66	level2			188.117	143.8	POS	1.87661e+08	1.21264e+08	1.43079e+08	1.24684e+08	2.09907e+08	4.44389e+08	1.5968e+08	1.77714e+08	1.15867e+08	2.55454e+08	1.76819e+08	1.191e+08	1.13203e+08	1.29664e+08	2.27537e+08	1.11021e+08	1.12429e+08	1.46536e+08	1.26586e+08	1.90701e+08	2.40265e+08	3.40575e+08	4.65383e+08	2.48556e+08	1.91534e+08	1.89135e+08	1.934e+08	2.33251e+08
2,6-Dihydroxybenzaldehyde	2.66	level2			137.024	140.5	NEG	1.5036e+08	1.59182e+08	1.31061e+08	1.46106e+08	1.34367e+08	1.65245e+08	1.41922e+08	1.50307e+08	1.81212e+08	1.77461e+08	1.59334e+08	1.31696e+08	1.08829e+08	1.05886e+08	1.37373e+08	1.30676e+08	1.26479e+08	1.2227e+08	7.85357e+07	9.41418e+07	1.1569e+08	7.22233e+07	6.64862e+07	6.74404e+07	1.18696e+08	1.1877e+08	1.19881e+08	2.20538e+08
Lenalidomide__	2.66	level2			260.102	135.4	POS	1.7613e+07	1.98697e+07	1.86229e+07	1.8179e+07	1.19426e+07	2.40525e+07	1.50786e+07	1.43661e+07	1.47869e+07	2.14685e+07	1.65988e+07	1.51533e+07	1.58611e+07	2.06542e+07	1.44015e+07	1.80265e+07	1.54464e+07	1.64352e+07	1.59851e+07	1.24696e+07	1.27835e+07	1.76126e+07	1.60523e+07	1.53553e+07	1.57424e+07	1.95437e+07	1.45268e+07	1.55194e+07
2-(Hydroxymethyl)-6-methylpyridin-3-ol	2.66	level2			138.055	120	NEG	7.46284e+07	6.64437e+07	2.41972e+07	9.50313e+06	5.90855e+07	5.137e+07	8.7971e+06	4.97612e+07	7.15967e+07	1.21415e+08	5.95431e+07	6.20921e+07	1.3413e+08	3.58763e+07	8.25938e+07	6.56091e+07	7.81831e+07	5.51395e+07	1.5448e+08	4.07421e+07	7.9441e+07	2.9289e+07	9.43513e+07	5.78522e+07	7.61448e+07	1.32167e+08	8.29559e+07	1.33595e+08
6,7-Dimethoxyquinolin-4-ol	2.66	level2			206.08	87.5	POS	1.40331e+08	1.79657e+08	8.64027e+07	6.3593e+07	1.02908e+08	6.84427e+07	1.66723e+08	8.15792e+07	1.61207e+08	8.46067e+07	9.28352e+07	7.95417e+07	1.02272e+08	2.51705e+08	3.35282e+08	1.59524e+08	1.66065e+08	1.53966e+08	1.34509e+08	1.11756e+08	3.57919e+08	2.29873e+08	1.52318e+08	1.86265e+08	1.09716e+08	1.18374e+08	1.20176e+08	1.85695e+08
Terephthalic acid	2.66	level2			165.018	86.8	NEG	6.29334e+06	1.2501e+07	1.4872e+07	4.96428e+06	6.51017e+06	1.19724e+07	1.48755e+07	7.76059e+06	1.89601e+07	1.57908e+07	1.73208e+07	1.32245e+07	1.76504e+07	1.92826e+07	2.04817e+07	1.98257e+07	1.72679e+07	1.59716e+07	2.187e+07	2.28018e+07	2.35139e+07	1.14569e+07	1.60351e+07	1.53739e+07	1.46513e+07	1.59391e+07	9.99164e+06	7.53619e+06
Phenylglyoxylic acid	2.66	level2			149.024	55.8	NEG	1.3878e+08	1.14585e+08	1.06656e+08	1.15961e+08	8.36391e+07	1.32815e+08	3.79301e+07	4.79306e+07	6.48467e+07	4.73142e+07	3.86151e+07	2.94093e+07	9.31746e+06	1.51015e+07	1.14024e+07	1.33686e+07	3.33568e+06	8.25084e+06	3.59083e+07	2.8572e+07	5.01516e+07	3.68238e+07	2.98377e+07	9.90201e+06	5.1216e+07	5.04791e+07	5.11997e+07	5.26225e+07
Pro-Leu	2.66	level2			227.139	54.6	NEG	1.47115e+07	1.40949e+07	7.48673e+06	6.91009e+06	7.3009e+06	7.94472e+06	1.25897e+07	1.08836e+07	6.23451e+06	1.22248e+07	1.01119e+07	1.38644e+07	8.87905e+06	1.55082e+07	4.62443e+06	3.71456e+06	5.22799e+06	5.43603e+06	6.03964e+06	5.58419e+06	6.02713e+06	5.53952e+06	6.49126e+06	4.94754e+06	7.4262e+06	5.98605e+06	5.20636e+06	1.1343e+07
4-Formylaminoantipyrine	2.66	level2			232.107	43	POS	2.29069e+06	2.31429e+06	1.72315e+06	1.93455e+06	2.65071e+06	1.64517e+06	3.71235e+06	5.61384e+06	2.51131e+06	2.60579e+06	4.6435e+06	703122	1.4369e+07	1.57191e+07	1.5356e+07	1.69807e+07	1.56824e+07	2.89852e+07	1.26429e+07	7.68823e+06	8.44419e+06	2.46979e+07	1.5754e+07	3.19928e+06	9.68371e+06	8.59247e+06	8.53558e+06	7.80966e+06
1-[4-(Trifluoromethoxy)benzyl]piperazine	2.66	level2			261.122	42.4	POS	1.10401e+07	1.13425e+07	1.07121e+07	1.33729e+07	7.5935e+06	1.1497e+07	7.80279e+06	1.60459e+07	6.94435e+06	1.11504e+07	7.46259e+06	8.16878e+06	9.23743e+06	8.97187e+06	5.30247e+06	8.88179e+06	4.93141e+06	1.64124e+07	1.99539e+07	1.29286e+07	1.29469e+07	1.62528e+07	1.84701e+07	7.75682e+06	1.04616e+07	4.92315e+06	1.2724e+07	1.12368e+07
2-Hexylbenzothiazole	2.66	level2			220.117	39.7	POS	3.28758e+07	3.64463e+07	4.43898e+07	3.97435e+07	3.1131e+07	2.00412e+07	4.59094e+07	2.71627e+07	4.74212e+07	4.53386e+07	4.52171e+07	6.40618e+07	3.16247e+07	6.59972e+07	2.21344e+07	5.69225e+07	6.26545e+07	7.6982e+07	3.25049e+07	3.99632e+07	3.08462e+07	6.92906e+07	6.21806e+07	4.63099e+07	3.34101e+07	3.44975e+07	4.06315e+07	3.28506e+07
8-Oxoadenine	2.66	level2			152.056	36.7	POS	3.48315e+07	3.09478e+07	3.29056e+07	4.36514e+07	2.58692e+07	2.83084e+07	3.77213e+07	4.01413e+07	3.2344e+07	4.20447e+07	3.2184e+07	3.35674e+07	3.16333e+07	2.91568e+07	2.60406e+07	2.16463e+07	2.73158e+07	3.89839e+07	1.87797e+07	1.75292e+07	1.82982e+07	3.3092e+07	2.82023e+07	2.31727e+07	2.89731e+07	2.94773e+07	3.2062e+07	3.20375e+07
2-[(1-Methyl-1H-benzimidazol-2-yl)amino]ethanol	2.66	level2			192.112	36.4	POS	1.2078e+08	8.66394e+07	6.34883e+07	7.0073e+07	1.05749e+08	9.63026e+07	1.25857e+08	3.1214e+08	1.06211e+08	1.84411e+08	1.31754e+08	8.57546e+07	3.64214e+08	4.89953e+08	2.76851e+08	3.3814e+08	3.74889e+08	5.01273e+08	1.48382e+08	9.6541e+07	1.91482e+08	3.64977e+08	2.91418e+08	1.57391e+08	2.08312e+08	2.01402e+08	2.3149e+08	2.2065e+08
(Isobutylamino)(oxo)acetic acid	2.66	level2			144.066	28.6	NEG	5.12141e+06	6.31589e+06	7.11331e+06	5.16273e+06	6.71753e+06	6.49261e+06	1.03038e+07	8.92637e+06	1.02512e+07	1.21108e+07	8.74256e+06	1.19207e+07	9.59199e+06	9.53637e+06	9.39662e+06	8.40807e+06	7.7799e+06	1.03813e+07	7.96728e+06	8.5031e+06	9.03101e+06	8.39293e+06	8.82102e+06	9.46154e+06	7.19651e+06	8.48362e+06	8.11381e+06	9.02938e+06
Trifluoroacetic acid	2.66	level2			112.985	28	NEG	6.75777e+06	5.31465e+06	4.79955e+06	4.55763e+06	3.54792e+06	5.2156e+06	3.09539e+06	2.37916e+06	3.43857e+06	2.79741e+06	2.51794e+06	3.20173e+06	3.53573e+06	5.77353e+06	2.42961e+06	4.92095e+06	2.53642e+06	3.74944e+06	5.08547e+06	4.25964e+06	3.26764e+06	5.10843e+06	3.03332e+06	3.95652e+06	5.26139e+06	4.92809e+06	5.95983e+06	5.38995e+06
4-Methyloxazole-5-carboxylic acid	2.66	level2			126.019	24.6	NEG	1.34111e+07	1.35293e+07	1.41064e+07	1.42377e+07	1.24898e+07	1.44571e+07	5.59414e+06	7.15245e+06	1.09193e+07	8.14632e+06	8.4664e+06	7.59259e+06	5.0907e+06	7.6937e+06	3.5486e+06	7.07185e+06	3.96541e+06	5.3775e+06	3.52172e+06	4.74925e+06	6.70893e+06	5.03523e+06	5.81047e+06	4.41507e+06	8.43178e+06	8.29178e+06	9.4357e+06	6.02765e+06
1-Heptanamine	2.66	level2			116.143	15.8	POS	3.83433e+07	4.15265e+07	4.22998e+07	4.06142e+07	5.04715e+07	4.03746e+07	4.10113e+07	4.51358e+07	4.15621e+07	4.47301e+07	4.12109e+07	4.22802e+07	4.03646e+07	4.12579e+07	4.43836e+07	4.23255e+07	4.05174e+07	4.82917e+07	4.73439e+07	3.92132e+07	4.18501e+07	4.61219e+07	4.46475e+07	4.09911e+07	4.74572e+07	4.60766e+07	4.67164e+07	4.23079e+07
Cinchonic acid	2.66	level2			172.04	36.1	NEG	3.60695e+06	2.36705e+06	4.21379e+06	2.17247e+06	2.13606e+06	4.86433e+06	3.06811e+06	2.51722e+06	4.83947e+06	7.54695e+06	4.06164e+06	3.23827e+06	2.14864e+06	2.18501e+06	2.11797e+06	1.50759e+06	1.56062e+06	2.48524e+06	3.52238e+06	3.96546e+06	3.44708e+06	1.81613e+06	2.10581e+06	2.88814e+06	2.83796e+06	2.86336e+06	3.25147e+06	2.43374e+06
5-Amino-1-pentanol	2.65	level2			104.106	358.4	POS	9.2705e+06	8.86525e+06	7.99097e+06	8.26225e+06	9.16944e+06	8.5524e+06	1.0906e+07	8.59625e+06	9.21193e+06	8.4501e+06	7.94493e+06	7.44478e+06	5.3949e+06	6.28525e+06	8.99445e+06	6.3221e+06	9.6443e+06	6.59968e+06	6.57814e+06	7.19945e+06	8.10912e+06	6.48904e+06	8.0187e+06	8.41577e+06	8.14649e+06	6.25599e+06	8.49864e+06	1.74397e+07
1-Palmitoyl-2-linoleoyl-sn-glycero-3-phosphate	2.65	level2			671.463	346.5	NEG	2.39778e+06	3.65401e+06	1.41114e+06	3.46804e+06	2.08586e+06	3.39506e+06	2.7977e+06	2.688e+06	2.51476e+06	2.06588e+06	1.75045e+06	2.31164e+06	2.8579e+06	2.92515e+06	2.54099e+06	2.2674e+06	2.74701e+06	2.32079e+06	3.57606e+06	1.93527e+06	2.28325e+06	2.78763e+06	2.16019e+06	2.2397e+06	3.01009e+06	2.71249e+06	1.63895e+06	2.23408e+06
2,4,6-Tri-tert-butyl-N-methylaniline	2.65	level2			276.267	330	POS	2.4225e+06	2.92945e+06	1.9698e+06	2.66961e+06	2.35543e+06	2.45905e+06	2.57981e+06	2.39665e+06	2.31437e+06	2.48123e+06	2.2683e+06	2.2221e+06	1.54777e+06	1.88656e+06	1.54946e+06	1.66025e+06	1.60025e+06	524798	953001	1.72512e+06	1.48763e+06	1.86419e+06	1.55473e+06	1.78519e+06	1.93856e+06	2.04575e+06	2.0534e+06	1.72647e+06
2,4,6-Tri-tert-butylaniline	2.65	level2			262.252	329.3	POS	4.69822e+06	5.63157e+06	4.40672e+06	5.62097e+06	6.01697e+06	5.0811e+06	5.90366e+06	4.4878e+06	5.20346e+06	5.28529e+06	4.82247e+06	4.11634e+06	3.26175e+06	4.19375e+06	2.80085e+06	3.27359e+06	2.50377e+06	2.25669e+06	2.92416e+06	2.98751e+06	2.57101e+06	3.29227e+06	2.81741e+06	2.99933e+06	4.12037e+06	4.34133e+06	3.9197e+06	3.78111e+06
N-(14-Methylpentadecanoyl)phenylalanine	2.65	level2			404.314	316.2	POS	4.84268e+06	5.1561e+06	4.76053e+06	5.60439e+06	4.09778e+06	4.17763e+06	7.23118e+06	1.18945e+07	7.36809e+06	9.22022e+06	7.95841e+06	5.34008e+06	6.27869e+06	7.23612e+06	3.55659e+06	2.14041e+06	4.13363e+06	6.60656e+06	2.67572e+06	2.60419e+06	1.94982e+06	7.68864e+06	5.39055e+06	6.70696e+06	5.21779e+06	5.1626e+06	5.53192e+06	5.02276e+06
Undecanamide, N-cyclopropyl-11-(3-hydroxy-5-pentylphenoxy)-	2.65	level2			402.3	316.1	NEG	3.56631e+07	3.92736e+07	3.36103e+07	4.36092e+07	2.87113e+07	3.08012e+07	5.413e+07	8.59556e+07	4.68112e+07	6.81387e+07	4.9621e+07	4.07973e+07	4.70792e+07	5.11123e+07	3.27744e+07	1.68282e+07	3.00725e+07	5.93294e+07	1.98608e+07	1.94438e+07	1.65767e+07	5.76213e+07	4.05452e+07	5.10601e+07	3.92665e+07	4.13592e+07	4.24318e+07	4.17745e+07
AVOCADYNE	2.65	level2			283.227	302.2	NEG	1.42074e+08	1.04082e+08	1.40967e+08	9.85284e+07	1.80001e+08	1.99182e+08	1.37542e+08	1.19823e+08	1.52522e+08	2.02616e+08	1.60611e+08	1.86233e+08	1.62909e+08	1.78529e+08	2.91841e+08	2.82533e+08	2.19379e+08	1.45954e+08	4.20326e+08	4.62924e+08	5.17656e+08	3.84361e+08	3.47554e+08	2.39671e+08	2.40239e+08	2.36647e+08	2.25349e+08	2.41178e+08
5-Undecylbenzene-1,3-diol	2.65	level2			263.2	295.5	NEG	4.38578e+08	3.91793e+08	3.98348e+08	2.98115e+08	3.45238e+08	4.83899e+08	2.75766e+08	2.40663e+08	2.59856e+08	3.53926e+08	3.55202e+08	2.93801e+08	3.5644e+08	3.65085e+08	5.6261e+08	4.84282e+08	4.27953e+08	3.84792e+08	5.34182e+08	5.76884e+08	5.93462e+08	4.14357e+08	3.73221e+08	3.66e+08	3.96279e+08	3.92242e+08	3.87488e+08	3.88453e+08
12(S)-Hydroxy-16-heptadecynoic acid	2.65	level2			281.211	290.9	NEG	3.35481e+07	2.17081e+07	3.43109e+07	1.73133e+07	4.2753e+07	1.02096e+08	2.5698e+07	2.11133e+07	2.51521e+07	5.18187e+07	6.44897e+07	5.355e+07	3.53193e+07	4.07564e+07	8.97247e+07	7.56362e+07	9.48559e+07	3.69348e+07	1.85001e+08	2.07818e+08	2.19518e+08	1.27407e+08	1.24194e+08	5.68012e+07	1.0193e+08	7.00679e+07	6.66791e+07	6.99059e+07
3-hydroxy-tetradecanoic_acid	2.65	level2			243.195	289.6	NEG	1.46216e+08	1.17114e+08	1.41631e+08	9.49087e+07	1.54189e+08	2.72972e+08	1.32103e+08	1.32947e+08	1.35242e+08	1.91917e+08	2.1866e+08	1.6816e+08	1.31948e+08	1.1932e+08	2.62773e+08	2.41731e+08	1.43772e+08	1.27734e+08	3.70224e+08	3.62275e+08	3.93859e+08	3.24404e+08	3.04058e+08	2.89077e+08	2.80441e+08	1.86774e+08	1.85652e+08	1.87163e+08
2,6-Di-tert-butylphenol	2.65	level2			205.159	283	NEG	6.95029e+06	6.53425e+06	6.08249e+06	6.31325e+06	5.88782e+06	6.82198e+06	6.71955e+06	6.37506e+06	6.81076e+06	6.63556e+06	6.71988e+06	7.84954e+06	7.14315e+06	7.82943e+06	7.29413e+06	7.2896e+06	7.73018e+06	6.55237e+06	7.55465e+06	7.65773e+06	7.10698e+06	6.2667e+06	6.92793e+06	6.98834e+06	7.63413e+06	7.12557e+06	7.09195e+06	6.95037e+06
(R)-3-Methylcyclohexanone	2.65	level2			113.096	275.8	POS	1.28241e+07	1.48259e+07	1.43017e+07	1.60202e+07	1.84506e+07	1.50093e+07	1.60896e+07	2.02871e+07	1.4842e+07	1.42953e+07	1.24292e+07	1.27864e+07	7.29019e+06	7.97433e+06	8.04071e+06	8.45111e+06	6.41864e+06	6.95107e+06	8.18263e+06	8.48158e+06	8.8778e+06	9.97507e+06	1.03728e+07	1.08802e+07	1.08701e+07	1.15303e+07	1.13247e+07	1.0525e+07
(-)-1,2:5,6-Di-O-cyclohexylidene-L-inositol	2.65	level2			341.194	271.2	POS	2.66189e+07	2.69264e+07	3.32887e+07	2.74941e+07	3.88367e+07	2.99007e+07	3.18149e+07	3.35983e+07	3.85664e+07	3.52523e+07	2.9262e+07	3.50037e+07	2.01799e+07	1.95732e+07	2.19352e+07	1.79937e+07	1.70679e+07	1.95416e+07	1.83138e+07	1.7297e+07	1.7231e+07	2.05848e+07	2.07054e+07	1.83179e+07	2.34017e+07	2.61602e+07	2.50663e+07	2.66317e+07
DL-threo-1-Phenyl-2-(decanoylamino)-3-morpholino-1-propanol	2.65	level2			391.297	267.3	POS	1.11063e+07	1.03591e+07	1.54507e+07	9.87655e+06	2.14336e+07	8.09383e+06	7.8214e+06	8.65084e+06	1.03136e+07	7.55379e+06	1.08858e+07	8.95523e+06	8.74245e+06	7.58723e+06	9.20085e+06	7.62863e+06	1.04727e+07	7.80691e+06	8.88746e+06	8.69448e+06	9.11444e+06	8.04943e+06	8.95902e+06	8.33685e+06	9.14417e+06	7.01694e+06	1.06587e+07	9.11794e+06
(15:3)-Anacardic acid	2.65	level2			341.211	267.2	NEG	1.20986e+06	1.81029e+06	1.62771e+06	1.26016e+06	1.93337e+06	2.5942e+06	2.26828e+06	1.62919e+06	5.02138e+06	6.77114e+06	1.92199e+06	1.65964e+06	1.57247e+06	3.07788e+06	2.70461e+06	2.11416e+06	1.79102e+06	1.83845e+06	4.78135e+06	5.30791e+06	4.8141e+06	3.62626e+06	3.60631e+06	4.88209e+06	1.96868e+06	2.3893e+06	2.72252e+06	4.16811e+06
(4E,8E,12E,16E)-2,3,7,11,15-Pentahydroxy-4,6,8,10,12,14,16-heptamethyloctadeca-4,8,12,16-tetraenoic acid	2.65	level2			453.284	261.3	NEG	1.44434e+07	8.43286e+06	2.64e+07	4.80217e+06	1.88343e+07	1.14564e+07	4.96387e+06	8.44306e+06	2.51456e+07	8.01247e+06	5.5503e+06	3.80544e+06	2.01477e+07	2.48975e+07	1.77045e+07	2.34986e+07	3.50609e+07	2.84857e+07	1.00479e+08	5.15328e+07	6.4178e+07	6.97593e+07	8.92817e+07	1.12195e+08	2.91042e+07	3.02596e+07	3.24157e+07	3.21997e+07
11-Deoxyprostaglandin F1.alpha.	2.65	level2			339.252	255.3	NEG	7.06078e+07	7.2453e+07	2.85375e+07	7.3796e+07	3.11218e+07	2.53774e+07	6.93502e+07	3.32212e+07	7.55737e+07	3.09507e+07	6.63655e+07	9.1404e+07	6.64461e+07	2.19866e+07	6.94177e+07	6.822e+07	5.84224e+07	2.12376e+07	2.13393e+07	1.88674e+07	5.70146e+07	6.56018e+07	2.84016e+07	2.43796e+07	7.388e+07	2.41574e+07	7.67925e+07	2.40999e+07
7,4'-Dimethoxy-5-hydroxyisoflavone	2.65	level2			297.079	254.1	NEG	3.06561e+06	4.38121e+06	5.36315e+06	3.22846e+06	8.33384e+06	3.49692e+06	6.49703e+06	5.51324e+06	1.07258e+07	7.29376e+06	6.22304e+06	5.5706e+06	3.46815e+06	2.21557e+06	1.98304e+06	4.08227e+06	1.37682e+06	979169	951668	1.49561e+06	1.07611e+06	2.30352e+06	1.99841e+06	2.02214e+06	3.75134e+06	3.93415e+06	3.87914e+06	4.12938e+06
Amorfrutin 2	2.65	level2			305.174	250	NEG	2.84635e+07	3.3394e+07	2.73827e+07	2.76909e+07	2.31733e+07	2.64315e+07	2.18662e+07	2.60413e+07	2.7139e+07	2.43478e+07	2.13571e+07	2.02492e+07	2.37132e+07	2.13127e+07	2.47243e+07	1.81317e+07	1.85348e+07	2.5311e+07	2.01486e+07	1.70495e+07	2.05344e+07	2.44284e+07	2.01823e+07	1.99033e+07	2.22009e+07	2.38393e+07	2.34913e+07	2.35656e+07
4-Methylacetophenone	2.65	level2			135.08	249.1	POS	1.24975e+07	1.15838e+07	1.46561e+07	9.24261e+06	1.78736e+07	1.71217e+07	2.01937e+07	8.41945e+06	2.79194e+07	2.6896e+07	3.04363e+07	2.35317e+07	2.68868e+07	2.72889e+07	3.67564e+07	3.59039e+07	3.16596e+07	2.68937e+07	3.72145e+07	3.89218e+07	3.58243e+07	2.73379e+07	2.62673e+07	2.78183e+07	2.71107e+07	2.79494e+07	2.65574e+07	2.80631e+07
Annosquamosin_B	2.65	level2			309.241	248.1	POS	3.98582e+06	6.70117e+06	6.51636e+06	6.5494e+06	7.36889e+06	3.66188e+06	7.3645e+06	9.14628e+06	8.20227e+06	8.99804e+06	7.74586e+06	7.28586e+06	6.11534e+06	3.63669e+06	6.42481e+06	4.14347e+06	5.48733e+06	4.21157e+06	6.47745e+06	4.35733e+06	4.62614e+06	4.93472e+06	4.45931e+06	4.93284e+06	4.44077e+06	6.18985e+06	4.37557e+06	4.83077e+06
1-Heptadecene-4,6-diyne-3,9-diol	2.65	level2			263.199	245.5	POS	1.48162e+08	1.59605e+08	3.48454e+07	3.71924e+07	5.68472e+07	1.5269e+08	1.52401e+08	1.52803e+08	4.17444e+07	3.29567e+07	2.70799e+07	3.59659e+07	2.67118e+07	2.85412e+07	3.9062e+07	3.09277e+07	2.37155e+07	3.15732e+07	6.97672e+07	7.37753e+07	2.22404e+07	6.23315e+07	3.01438e+07	1.6372e+08	3.34644e+07	1.4349e+08	1.43899e+08	8.2222e+07
Marasmen-3-one	2.65	level2			249.147	244.8	POS	5.41363e+06	5.10235e+06	6.00702e+06	3.06376e+06	6.81934e+06	5.63858e+06	2.29475e+06	1.59026e+06	3.67261e+06	3.84051e+06	4.03285e+06	0	4.58314e+06	4.46041e+06	5.09953e+06	5.1387e+06	6.23214e+06	5.6162e+06	8.14345e+06	8.61151e+06	7.76089e+06	7.67462e+06	7.7172e+06	7.14889e+06	3.22618e+06	4.50624e+06	5.81893e+06	5.51281e+06
(1(10)E,4a,5E)-1(10),5-Germacradiene-12-acetoxy-4,11-diol	2.65	level2			297.205	241.5	POS	6.14902e+06	9.49977e+06	9.26294e+06	3.33712e+06	1.0593e+07	8.53961e+06	2.37359e+07	2.04905e+07	7.52263e+06	3.57443e+07	1.55466e+07	1.3331e+07	2.36141e+07	1.23272e+07	1.11882e+07	1.33024e+07	2.59289e+07	2.48119e+07	4.95982e+07	3.32937e+07	2.30927e+07	2.69645e+07	2.9903e+07	4.90742e+07	1.80594e+07	1.00017e+07	1.28647e+07	1.01342e+07
1,7-Bis(3,4-dihydroxyphenyl)heptan-3-yl acetate	2.65	level2			373.167	238.9	NEG	8.73968e+07	8.83417e+07	8.4342e+07	8.82734e+07	7.13596e+07	8.16245e+07	5.56607e+07	5.68285e+07	8.42958e+07	6.80715e+07	6.62749e+07	6.16913e+07	6.23424e+07	5.8223e+07	3.80504e+07	2.59839e+07	3.88405e+07	6.48964e+07	3.02013e+07	1.55067e+07	2.72222e+07	4.70172e+07	2.85177e+07	4.017e+07	5.29101e+07	5.91734e+07	5.38681e+07	5.54914e+07
Sorbicillin	2.65	level2			231.101	233.8	NEG	6.28122e+06	1.07127e+07	1.2218e+07	5.98788e+06	1.7781e+07	8.58997e+06	1.45138e+07	1.07049e+07	2.09239e+07	2.05694e+07	2.96158e+07	1.51466e+07	1.24784e+07	1.64907e+07	1.6208e+07	8.67435e+06	6.90268e+06	3.64511e+06	6.53825e+06	7.49517e+06	4.81458e+06	6.85403e+06	7.17347e+06	5.22323e+06	1.09244e+07	1.14375e+07	1.12534e+07	1.17696e+07
5S,15S-DiHETE	2.65	level2			359.218	232.7	POS	3.19577e+07	3.27e+07	3.43532e+07	3.32458e+07	3.85942e+07	3.25829e+07	4.58861e+07	5.47253e+07	5.537e+07	4.65974e+07	4.3328e+07	4.09518e+07	4.34882e+07	3.68367e+07	4.21176e+07	3.47634e+07	3.22114e+07	3.68833e+07	2.40954e+07	2.86806e+07	2.31789e+07	3.40281e+07	3.2172e+07	2.99989e+07	3.6748e+07	3.70392e+07	3.6721e+07	3.61229e+07
(12Z)-9,10,11-Trihydroxyoctadec-12-enoic acid	2.65	level2			329.231	231	NEG	1.22825e+08	1.63571e+08	1.23911e+08	1.55653e+08	1.37547e+08	1.3501e+08	1.12791e+08	1.10033e+08	1.2053e+08	1.07424e+08	9.18665e+07	8.55989e+07	7.7804e+07	8.99855e+07	7.20569e+07	7.93393e+07	8.85099e+07	7.63156e+07	7.47596e+07	6.65869e+07	8.96689e+07	1.00776e+08	9.79178e+07	8.47193e+07	1.00933e+08	9.87406e+07	1.02112e+08	1.02391e+08
2,5-Octadien-1-ol	2.65	level2			127.111	230.2	POS	7.57064e+07	5.03972e+07	5.36736e+07	1.35052e+08	1.05495e+08	6.36135e+07	8.943e+07	1.16281e+08	5.93132e+07	1.4213e+08	5.13902e+07	4.84749e+07	8.13271e+07	6.4904e+07	5.02476e+07	3.95604e+07	3.44108e+07	5.94007e+07	3.42034e+07	3.57514e+07	3.23623e+07	5.82743e+07	3.59176e+07	7.4114e+07	9.34206e+07	4.52435e+07	8.77642e+07	4.42107e+07
Norcamphor	2.65	level2			111.08	230.1	POS	1.48443e+07	1.56791e+07	1.8137e+07	1.60975e+07	2.23732e+07	1.51059e+07	1.6044e+07	1.32936e+07	1.81547e+07	1.54193e+07	1.39611e+07	1.56469e+07	1.29187e+07	1.29741e+07	1.50381e+07	1.33442e+07	1.03102e+07	1.21817e+07	1.25956e+07	1.31129e+07	1.25334e+07	1.07626e+07	1.23657e+07	1.38722e+07	1.50489e+07	1.38239e+07	1.41819e+07	1.3677e+07
Lasiodiplodin	2.65	level2			291.158	227.7	NEG	7.70179e+06	9.0315e+06	9.64071e+06	8.08662e+06	1.04855e+07	9.27623e+06	8.56961e+06	6.6565e+06	1.00485e+07	7.71264e+06	8.54896e+06	7.27755e+06	9.53641e+06	8.54751e+06	1.02457e+07	9.04886e+06	7.89819e+06	5.52634e+06	9.08988e+06	8.06992e+06	9.82796e+06	8.01756e+06	7.45693e+06	8.32682e+06	8.74893e+06	7.50464e+06	8.47192e+06	8.62779e+06
4',5,7-Trihydroxy-3,6-dimethoxyflavone	2.65	level2			329.065	218.7	NEG	1.16363e+08	1.22366e+08	9.20481e+07	1.56389e+08	1.21709e+08	1.0762e+08	1.17732e+08	1.51063e+08	1.03071e+08	1.1963e+08	9.63667e+07	9.93451e+07	7.25257e+07	1.05397e+08	1.3352e+08	1.43566e+08	7.58383e+07	1.10107e+08	8.42173e+07	9.53536e+07	1.08196e+08	1.01133e+08	1.22205e+08	1.10928e+08	1.08308e+08	1.09377e+08	1.10206e+08	1.11223e+08
(E)-5-Hydroxyundec-2-enoic acid	2.65	level2			199.133	215.2	NEG	9.40897e+07	9.99567e+07	8.60777e+07	8.97105e+07	8.53043e+07	1.10034e+08	8.75261e+07	9.12242e+07	9.19917e+07	9.15009e+07	8.33086e+07	7.96662e+07	9.22788e+07	9.36271e+07	1.10988e+08	9.5959e+07	9.9831e+07	9.70844e+07	1.08101e+08	1.14788e+08	1.28297e+08	9.35276e+07	8.98805e+07	7.83159e+07	9.19791e+07	9.62151e+07	9.11364e+07	9.55194e+07
1-(3,4-Diethoxybenzyl)-6,7-diethoxyisoquinoline	2.65	level2			396.215	212.4	POS	7.48203e+06	8.17139e+06	1.08796e+07	4.19873e+06	8.11077e+06	8.43879e+06	1.02174e+07	1.03368e+07	9.55788e+06	1.12325e+07	1.00145e+07	7.13095e+06	1.07037e+06	756701	1.15038e+06	726275	827926	1.38572e+06	847413	622059	623211	4.93199e+06	4.96946e+06	4.14597e+06	4.5874e+06	5.02936e+06	5.94209e+06	5.3662e+06
3-Methyl-.gamma.-butyrolactone	2.65	level2			101.059	211.7	POS	1.60576e+07	1.93079e+07	1.78644e+07	1.67298e+07	1.74357e+07	1.92672e+07	1.54197e+07	1.5529e+07	1.87149e+07	1.47354e+07	1.55324e+07	1.81202e+07	1.27637e+07	1.43379e+07	1.48347e+07	1.36304e+07	1.33504e+07	1.16066e+07	1.60999e+07	1.27472e+07	1.3214e+07	1.85287e+07	1.37664e+07	1.64592e+07	1.47457e+07	1.47782e+07	1.63174e+07	1.70506e+07
13,14-Dihydro-16,16-difluoroprostaglandin J2	2.65	level2			371.206	207.4	NEG	2.19294e+07	2.13008e+07	2.24405e+07	2.55982e+07	2.40833e+07	2.4089e+07	1.51684e+07	1.85375e+07	1.46391e+07	1.3231e+07	1.29957e+07	1.39938e+07	1.96727e+07	2.80541e+07	2.448e+07	2.14858e+07	1.1741e+07	2.68035e+07	1.90514e+07	7.15488e+06	2.44304e+07	1.43764e+07	1.27162e+07	1.88991e+07	1.81664e+07	1.77203e+07	1.7582e+07	1.96671e+07
Fuberidazole	2.65	level2			185.07	206.1	POS	5.97361e+06	5.77461e+06	6.81106e+06	5.9304e+06	5.29421e+06	6.11356e+06	6.43661e+06	5.87252e+06	6.72317e+06	7.09846e+06	6.03612e+06	6.13556e+06	5.30812e+06	4.70117e+06	4.70598e+06	4.88841e+06	4.72914e+06	4.7608e+06	6.51078e+06	7.51492e+06	7.61792e+06	5.60585e+06	5.14045e+06	5.92823e+06	5.6082e+06	5.54183e+06	5.63174e+06	5.26205e+06
4-Methylcyclohexaneacetic acid	2.65	level2			155.107	205.2	NEG	9.69023e+07	9.0501e+07	9.17095e+07	8.22074e+07	8.2113e+07	1.03826e+08	8.7899e+07	7.89133e+07	1.04214e+08	1.00169e+08	9.72079e+07	9.30664e+07	9.93538e+07	1.1875e+08	1.19768e+08	1.09159e+08	9.78528e+07	1.0238e+08	9.4424e+07	9.58253e+07	1.08578e+08	8.20095e+07	7.44444e+07	6.17221e+07	9.62422e+07	9.30972e+07	9.32399e+07	9.63003e+07
9-Hydroxynonanoic acid	2.65	level2			173.117	199.8	NEG	3.35889e+07	3.46502e+07	3.48793e+07	3.40849e+07	4.03225e+07	5.05895e+07	3.29074e+07	3.12982e+07	3.4399e+07	3.66729e+07	3.30774e+07	3.14861e+07	3.87053e+07	4.28091e+07	3.99895e+07	3.98122e+07	3.78416e+07	3.79261e+07	3.85923e+07	5.22689e+07	3.97111e+07	3.85545e+07	3.4779e+07	3.8156e+07	3.60049e+07	3.58408e+07	3.65046e+07	3.60928e+07
Harmol	2.65	level2			199.085	195.3	POS	1.27949e+08	1.20459e+08	9.20159e+07	8.87993e+07	9.43406e+07	1.42406e+08	1.22374e+08	1.95869e+08	1.09793e+08	1.45927e+08	9.79452e+07	7.51266e+07	7.88953e+07	7.03281e+07	1.1894e+08	5.53773e+07	8.84488e+07	1.69232e+08	8.33763e+07	6.96478e+07	8.46488e+07	1.7628e+08	1.54236e+08	1.15803e+08	1.09766e+08	1.1144e+08	1.13851e+08	1.10145e+08
8-Methylquinolin-2(1H)-one	2.65	level2			160.075	193.9	POS	4.37723e+06	4.57835e+06	4.09946e+06	4.5853e+06	3.44748e+06	4.6035e+06	5.73054e+06	6.48711e+06	7.06887e+06	7.09201e+06	6.01356e+06	5.52884e+06	4.62594e+06	3.58317e+06	3.68337e+06	3.23909e+06	3.40749e+06	3.51323e+06	4.11286e+06	2.42761e+06	2.45951e+06	4.14023e+06	4.43213e+06	5.41894e+06	4.48363e+06	4.70529e+06	4.53665e+06	4.13614e+06
Protoporphyrin	2.65	level2			561.254	193.4	NEG	2.11593e+07	2.46602e+07	2.35042e+07	1.36534e+07	2.51006e+07	2.32865e+07	1.18781e+07	8.09984e+06	2.05635e+07	1.09237e+07	1.63756e+07	1.36324e+07	1.23276e+07	1.3797e+07	2.16962e+07	1.60605e+07	1.92001e+07	1.79434e+07	4.19714e+07	1.55033e+07	3.68559e+07	2.902e+07	1.43355e+07	1.63657e+07	1.38773e+07	1.1607e+07	1.5515e+07	2.20659e+07
2-[5-(2-Hydroxypropyl)oxolan-2-yl]propanoic acid	2.65	level2			201.112	188.4	NEG	1.58782e+07	1.2322e+07	1.3735e+07	1.2067e+07	7.95e+06	1.16669e+07	1.30646e+07	1.71131e+07	1.47674e+07	1.348e+07	7.7588e+06	1.23866e+07	1.43011e+07	1.57938e+07	1.59622e+07	1.48921e+07	1.39084e+07	1.41888e+07	1.42634e+07	1.47546e+07	1.55374e+07	1.3451e+07	1.25686e+07	8.55536e+06	1.50041e+07	1.3482e+07	1.35547e+07	2.05655e+07
2-Amino-5-phenylpyridine	2.65	level2			171.091	185.4	POS	3.44218e+06	3.4068e+06	2.62495e+06	2.17569e+06	3.31381e+06	3.46041e+06	3.48172e+06	3.32058e+06	4.19484e+06	4.44595e+06	3.70119e+06	4.49301e+06	8.13463e+06	7.14772e+06	5.60174e+06	8.33835e+06	5.77419e+06	5.38553e+06	8.55503e+06	6.57244e+06	5.63376e+06	4.16968e+06	3.83526e+06	5.78079e+06	5.89478e+06	4.42803e+06	3.54629e+06	5.08492e+06
2-(4-tert-Butylphenyl)-1,3-benzoxazol-6-amine	2.65	level2			267.148	182.7	POS	1.5534e+07	1.26174e+07	9.4365e+06	7.49596e+06	1.01929e+07	1.43046e+07	1.51228e+07	5.22246e+07	1.02068e+07	2.53253e+07	2.04777e+07	1.27742e+07	4.20249e+07	7.63635e+07	6.09639e+07	4.78126e+07	5.22913e+07	7.4807e+07	1.63978e+07	1.50024e+07	1.90222e+07	5.89311e+07	4.0715e+07	2.03927e+07	2.87803e+07	3.03791e+07	3.07753e+07	3.05439e+07
2-(4-tert-Butylphenyl)-4(1H)-quinazolinone	2.65	level2			279.148	178	POS	8.07462e+06	6.47287e+06	5.02301e+06	4.68237e+06	5.4347e+06	8.30281e+06	6.47602e+06	1.50217e+07	6.69205e+06	9.18127e+06	7.06877e+06	4.72612e+06	6.60308e+06	8.99778e+06	7.22565e+06	4.39946e+06	7.23705e+06	1.38061e+07	4.14715e+06	3.62948e+06	4.13812e+06	1.37597e+07	1.09052e+07	7.2215e+06	7.28631e+06	7.60978e+06	7.81416e+06	6.78676e+06
15-Deoxyoxalicine B	2.65	level2			504.239	177.4	POS	7.17551e+06	7.47003e+06	9.03625e+06	6.18271e+06	6.05466e+06	8.58179e+06	7.87868e+06	6.50082e+06	1.01533e+07	1.32485e+07	7.46792e+06	9.06213e+06	3.35613e+06	3.53274e+06	2.87206e+06	2.98605e+06	2.75207e+06	2.68808e+06	5.22561e+06	5.16699e+06	3.74976e+06	3.32358e+06	4.71627e+06	5.36406e+06	5.94715e+06	5.99619e+06	6.07225e+06	5.8717e+06
(1R,3R,4R,5S,6S,8x)-1-Acetoxy-8-angeloyloxy-3,4-epoxy-5-hydroxy-7(14),10-bisaboladien-2-one	2.65	level2			407.206	176.1	POS	1.86982e+07	2.01041e+07	2.44029e+07	1.82491e+07	3.43736e+07	4.63997e+07	1.55539e+07	1.04635e+07	1.43616e+07	1.09616e+07	1.12632e+07	8.84979e+06	1.72932e+07	2.16042e+07	3.64823e+07	1.54924e+07	1.93366e+07	2.45114e+07	2.26328e+07	1.50994e+07	1.82125e+07	1.71768e+07	1.82384e+07	2.42947e+07	2.01769e+07	2.17228e+07	1.9718e+07	2.09926e+07
Clothianidin	2.65	level2			250.014	172	POS	1.46433e+06	2.03782e+06	1.42141e+06	1.55375e+06	750476	1.38225e+06	0	0	0	0	0	0	1.00243e+08	1.02439e+08	2.51354e+07	6.48932e+07	3.66452e+07	8.92515e+07	3.77044e+07	1.76513e+07	1.95993e+07	3.32961e+07	1.4328e+07	4.71562e+07	2.486e+07	2.479e+07	2.48557e+07	2.35631e+07
Imidacloprid	2.65	level2			256.059	170.9	POS	2.15607e+06	1.74457e+06	2.06258e+06	1.92542e+06	2.03147e+06	1.93938e+06	2.02697e+06	2.66258e+06	1.3294e+06	2.43951e+06	1.87235e+06	954660	4.89205e+07	3.73584e+07	1.29443e+07	2.95029e+07	2.34303e+07	2.31779e+07	4.21579e+07	2.75178e+07	1.23581e+07	2.43804e+07	1.57328e+07	4.56989e+07	1.4954e+07	1.44948e+07	1.42215e+07	1.46938e+07
cis-Pinonic acid	2.65	level2			183.102	168.9	NEG	5.1515e+06	556343	4.45894e+06	4.41277e+06	4.97802e+06	4.8299e+06	4.44452e+06	4.57619e+06	3.94358e+06	5.2732e+06	5.57734e+06	5.64146e+06	5.23531e+06	6.59451e+06	6.68756e+06	7.85912e+06	6.26746e+06	5.40225e+06	6.24567e+06	7.12289e+06	5.97716e+06	5.50868e+06	5.68456e+06	4.3296e+06	5.28451e+06	5.82492e+06	4.17155e+06	6.36256e+06
5-Hydroxyflunixin	2.65	level2			313.078	168.2	POS	7.09269e+07	7.68664e+07	5.95415e+07	7.31315e+07	6.56993e+07	6.19839e+07	8.41469e+07	7.87225e+07	7.79308e+07	5.98642e+07	7.72478e+07	6.76121e+07	8.82295e+07	1.01188e+08	8.29035e+07	9.04228e+07	8.63615e+07	9.9589e+07	7.1643e+07	6.44232e+07	7.24884e+07	9.93469e+07	9.03951e+07	1.00936e+08	7.72005e+07	7.96214e+07	7.91362e+07	7.96731e+07
Imidazo[5,1-f][1,2,4]triazin-4(1H)-one, 2-[(3,4-dimethoxyphenyl)methyl]-7-[(1R)-1-[(1R)-1-hydroxyethyl]-4-phenylbutyl]-5-methyl-	2.65	level2			477.248	166.8	POS	1.63832e+06	1.03804e+06	1.36816e+06	983545	854683	549828	737766	1.13447e+06	1.25857e+06	700380	1.12991e+06	1.23794e+06	1.15128e+06	1.19251e+06	1.02454e+06	1.05322e+06	1.39137e+06	1.49827e+06	1.1835e+06	1.02962e+06	654288	1.55578e+06	1.53109e+06	1.15423e+06	580964	849818	757387	1.13767e+06
rac-trans-4-Cotininecarboxylic acid	2.65	level2			221.091	166.2	POS	3.206e+07	3.25913e+07	3.77976e+07	3.09536e+07	4.03843e+07	4.4573e+07	3.34521e+07	2.82733e+07	3.79111e+07	4.07577e+07	3.23415e+07	3.6966e+07	2.88635e+07	3.05919e+07	3.60123e+07	2.94482e+07	2.74158e+07	2.77104e+07	3.96396e+07	4.75578e+07	4.89491e+07	2.42292e+07	2.58279e+07	3.40205e+07	3.47252e+07	3.43503e+07	3.54717e+07	3.50157e+07
1-Pentanone, 1-(3,4-dihydroxyphenyl)-2-(1-pyrrolidinyl)-	2.65	level2			264.158	165.5	POS	2.08573e+07	2.38518e+07	2.29578e+07	2.04443e+07	2.55744e+07	2.2073e+07	3.30638e+07	2.98892e+07	4.97944e+07	3.23568e+07	3.62539e+07	3.08573e+07	2.43268e+07	3.11451e+07	2.42607e+07	2.05841e+07	1.6989e+07	2.04871e+07	1.12334e+07	1.19101e+07	1.14697e+07	9.71357e+06	1.14526e+07	1.38297e+07	2.1995e+07	2.28724e+07	2.34632e+07	2.32652e+07
4-Butyloxazole	2.65	level2			126.091	164.2	POS	1.31083e+07	9.95694e+06	1.13149e+07	8.68837e+06	1.16221e+07	9.59024e+06	1.17571e+07	1.20824e+07	2.12656e+07	1.36841e+07	2.05413e+07	1.21945e+07	1.13118e+07	1.423e+07	1.15348e+07	1.15367e+07	1.05424e+07	1.14545e+07	9.87636e+06	8.97383e+06	8.45937e+06	1.11182e+07	1.03061e+07	1.15317e+07	1.08971e+07	1.13566e+07	1.09831e+07	1.59014e+07
4-(2-Cyclohexylethoxy)aniline	2.65	level2			220.168	158.9	POS	1.12019e+07	1.32042e+07	1.18911e+07	9.80797e+06	1.23743e+07	1.11753e+07	1.52399e+07	1.42724e+07	2.11666e+07	1.91707e+07	1.69836e+07	1.5344e+07	9.36363e+06	8.86651e+06	8.8434e+06	6.1653e+06	5.59446e+06	5.46287e+06	6.72763e+06	6.27203e+06	6.08966e+06	5.78268e+06	5.83536e+06	6.42123e+06	1.02819e+07	1.0173e+07	1.05483e+07	9.86469e+06
6,7-Diethoxy-4-methylcoumarin	2.65	level2			249.111	157.5	POS	1.63875e+07	1.97674e+07	2.06844e+07	2.86429e+07	1.80461e+07	2.03399e+07	1.94539e+07	1.8597e+07	1.87407e+07	1.81151e+07	2.09013e+07	1.69795e+07	4.12581e+07	2.10586e+07	2.25215e+07	1.92163e+07	2.00256e+07	2.31871e+07	2.80369e+07	2.22035e+07	1.99609e+07	2.76859e+07	2.2594e+07	1.97597e+07	1.84925e+07	1.83351e+07	1.92501e+07	2.06984e+07
2-(5-Methyl-2-furyl)-1H-benzimidazole	2.65	level2			199.085	155.9	POS	1.80325e+07	2.1262e+07	2.66984e+07	2.20632e+07	2.54801e+07	2.36163e+07	2.78043e+07	3.84227e+07	3.93896e+07	3.11082e+07	3.53953e+07	2.73058e+07	1.66258e+07	1.28448e+07	1.25976e+07	1.28743e+07	1.41268e+07	1.27006e+07	1.68809e+07	1.42941e+07	1.3395e+07	2.02045e+07	1.68674e+07	1.97535e+07	2.09659e+07	1.99695e+07	1.98421e+07	2.12356e+07
cis-3-Hexenyl_pyruvate	2.65	level2			171.101	155.2	POS	3.68311e+06	3.25207e+06	3.7504e+06	1.05573e+06	4.37104e+06	1.23899e+06	3.86809e+06	1.31072e+06	4.24438e+06	4.43603e+06	4.23007e+06	3.92337e+06	4.26604e+06	2.67683e+06	4.52624e+06	4.4104e+06	3.54828e+06	3.14317e+06	3.75043e+06	2.75482e+06	3.62945e+06	3.83089e+06	3.71317e+06	5.04552e+06	4.85282e+06	4.11722e+06	1.1274e+06	4.3967e+06
3-Tetrahydro-2-furanylpropanoic acid	2.65	level2			143.071	153.8	NEG	1.26258e+07	1.32009e+07	1.43395e+07	1.21037e+07	1.4551e+07	1.44515e+07	1.22564e+07	1.35667e+07	1.50504e+07	1.4363e+07	1.3963e+07	1.23136e+07	9.96359e+06	1.41061e+07	1.3983e+07	1.31525e+07	1.2263e+07	1.44311e+07	1.41882e+07	1.40949e+07	1.47014e+07	1.25713e+07	1.07059e+07	1.13726e+07	1.43683e+07	1.28048e+07	1.28678e+07	1.34509e+07
11-[(3-Hydroxypropyl)amino]-2,3-dihydro-1H-cyclopenta[4,5]pyrido[1,2-a]benzimidazole-4-carbonitrile	2.65	level2			307.154	151	POS	6.67193e+07	5.00918e+07	4.82214e+07	4.04025e+07	9.39866e+07	8.16546e+07	8.78026e+07	1.6661e+08	5.75371e+07	9.76693e+07	8.59836e+07	5.49425e+07	1.44137e+08	1.54068e+08	1.79698e+08	1.59795e+08	1.54236e+08	2.2413e+08	1.75357e+08	1.24665e+08	1.64098e+08	1.99633e+08	1.79688e+08	1.10771e+08	1.25097e+08	1.28379e+08	1.25177e+08	1.24705e+08
1,3-Cyclohexanedicarboxylic acid	2.65	level2			171.065	150.5	NEG	9.15042e+06	3.81647e+06	3.75133e+06	9.08808e+06	7.02114e+06	8.33467e+06	1.10797e+07	8.36108e+06	9.41608e+06	8.99394e+06	1.26988e+06	5.54586e+06	2.51131e+06	9.77601e+06	7.8915e+06	9.00814e+06	1.02504e+07	9.31818e+06	1.02145e+07	8.94708e+06	3.78333e+06	9.64432e+06	8.27456e+06	8.58636e+06	7.11564e+06	8.1174e+06	6.81027e+06	8.36611e+06
3-Furancarboxylic acid, tetrahydro-4-methylene-5-oxo-2-propyl-, (2R,3S)-rel-	2.65	level2			183.065	149.8	NEG	3.0671e+06	3.09548e+06	1.66785e+06	1.21528e+06	2.38358e+06	589923	3.22932e+06	2.9056e+06	2.96194e+06	3.14737e+06	1.34018e+06	2.93069e+06	3.41659e+06	2.98498e+06	4.72196e+06	3.5011e+06	3.72303e+06	3.39927e+06	1.54795e+06	2.58237e+06	1.26299e+06	1.54567e+06	1.71079e+06	2.70888e+06	2.85505e+06	3.16508e+06	3.23226e+06	3.42981e+06
2,5-Dimethoxy-4-(2-propenyl)phenol	2.65	level2			195.101	149.3	POS	1.52997e+07	2.03606e+07	5.13171e+07	1.04669e+07	1.84402e+07	1.51289e+07	2.07907e+07	2.19554e+07	2.20485e+07	2.07537e+07	2.06985e+07	1.95402e+07	1.80994e+07	1.24083e+07	2.85726e+07	1.1744e+07	1.29652e+07	1.32578e+07	5.15083e+07	5.31156e+07	1.93353e+07	3.2685e+07	4.56733e+07	1.54192e+07	1.67824e+07	1.55184e+07	1.7121e+07	4.77489e+07
(3aS,8aR)-1,3a,8-trimethyl-1,2,3,3a,8,8a-hexahydropyrrolo[2,3-b]indol-5-yl methylcarbamate	2.65	level2			276.169	148.4	POS	3.25702e+06	4.42811e+06	3.83502e+06	1.57769e+06	4.50333e+06	4.02205e+06	3.78985e+06	1.02945e+06	4.25343e+06	6.14888e+06	3.53699e+06	5.38175e+06	2.37251e+06	3.22519e+06	4.48727e+06	4.73038e+06	3.19294e+06	2.9416e+06	3.94631e+06	5.13644e+06	6.36331e+06	2.32955e+06	2.32255e+06	2.71602e+06	4.60309e+06	4.1258e+06	3.44885e+06	4.42732e+06
2-(3,4,5-Trimethoxyphenyl)-1H-benzimidazole	2.65	level2			285.122	148.2	POS	4.95483e+06	6.31463e+06	4.83275e+06	4.54046e+06	6.6494e+06	5.43955e+06	1.04992e+07	1.9499e+07	9.79475e+06	1.46593e+07	1.69477e+07	7.70828e+06	9.79027e+06	1.18494e+07	1.493e+07	2.05236e+07	1.16538e+07	1.25711e+07	9.91264e+06	1.14673e+07	1.50234e+07	1.28498e+07	1.03734e+07	7.86869e+06	9.99499e+06	1.03937e+07	1.04752e+07	1.06032e+07
1-(4-Piperidinyl)-1,3-dihydro-2H-indol-2-one	2.65	level2			217.132	147.7	POS	4.45306e+07	3.46551e+07	2.79487e+07	2.78689e+07	5.46224e+07	3.29895e+07	4.59599e+07	5.76659e+07	2.76598e+07	5.67257e+07	2.92912e+07	2.82497e+07	4.84049e+07	7.14386e+07	6.94572e+07	7.19667e+07	6.81334e+07	9.15635e+07	7.29924e+07	5.23852e+07	7.68023e+07	8.65937e+07	8.43108e+07	5.56567e+07	4.92109e+07	5.17122e+07	5.66305e+07	5.27446e+07
6-Chloro-2-picolinic acid	2.65	level2			155.985	139.9	NEG	557665	305371	1.11299e+06	743636	512042	933986	132656	314003	57871.8	167291	91959.3	220635	1.09445e+07	1.31882e+07	3.94604e+06	7.20758e+06	6.32131e+06	9.07974e+06	8.47496e+06	6.99963e+06	2.61588e+06	1.8142e+06	2.32434e+06	6.96945e+06	2.02362e+06	1.27643e+06	408643	2.868e+06
Flupentixol	2.65	level2			435.174	139.7	POS	2.20636e+06	1.94629e+06	748285	1.53519e+06	2.78024e+06	1.97149e+06	4.82891e+06	1.0663e+07	3.05064e+06	8.26018e+06	6.84524e+06	3.08491e+06	1.72771e+07	2.33218e+07	1.76958e+07	2.51169e+07	2.78769e+07	3.01679e+07	9.46854e+06	6.55767e+06	1.52262e+07	1.77588e+07	1.18764e+07	2.2259e+06	9.97345e+06	9.76819e+06	9.73122e+06	9.8158e+06
Pyridine, 4-[4-(4-fluorophenyl)-2-(4-nitrophenyl)-1H-imidazol-5-yl]-	2.65	level2			359.097	137.5	NEG	7.77656e+06	5.98149e+06	5.84322e+06	5.37585e+06	4.9332e+06	6.6356e+06	7.3142e+06	3.95234e+06	6.62336e+06	5.53609e+06	7.53222e+06	4.71841e+06	5.32086e+06	4.71559e+06	3.95247e+06	4.20613e+06	3.71247e+06	5.86013e+06	4.28359e+06	1.58041e+06	5.65448e+06	5.39444e+06	4.96179e+06	2.59055e+06	4.15185e+06	5.44114e+06	4.88747e+06	5.62806e+06
(3S,4R)-3-Benzyl-1-methyl-4-piperidinylamine	2.65	level2			205.169	133.9	POS	5.00091e+06	4.0062e+06	4.53887e+06	4.37231e+06	1.61027e+06	1.99969e+06	1.33932e+06	0	3.31602e+06	1.30788e+06	1.06441e+06	0	7.03665e+06	6.98656e+06	7.60597e+06	4.87679e+06	6.7113e+06	7.32657e+06	5.23108e+06	5.78334e+06	6.03654e+06	5.04966e+06	5.82632e+06	8.59253e+06	3.35847e+06	5.03544e+06	3.98486e+06	2.58914e+06
Ile-Ile	2.65	level2			245.185	47.5	POS	2.17088e+07	3.55542e+07	2.5573e+07	2.76825e+07	2.64262e+07	2.64436e+07	2.11044e+07	2.66478e+07	1.25137e+07	1.23396e+07	1.9972e+07	1.64559e+07	1.26568e+07	6.12398e+06	6.01584e+06	8.37649e+06	1.41822e+07	1.82247e+07	1.00866e+07	8.5441e+06	5.10562e+06	1.56749e+07	1.35465e+07	1.76022e+07	1.06698e+07	1.0559e+07	1.26499e+07	2.1927e+07
1-Methyl-3-nicotinoylpyrrolidine	2.65	level2			191.117	38.1	POS	6.84923e+08	4.01151e+08	5.46168e+08	3.11157e+08	6.44609e+08	7.07957e+08	5.33391e+08	8.04192e+08	4.26534e+08	6.44531e+08	5.50894e+08	3.87542e+08	9.76043e+08	1.10219e+09	1.30184e+09	1.2322e+09	1.26129e+09	1.89094e+09	1.17226e+09	9.1945e+08	1.6229e+09	2.18099e+09	1.60394e+09	6.01722e+08	8.47935e+08	1.04005e+09	8.87368e+08	9.14136e+08
Ethyl 4,5,6,7-tetrahydro-1H-indazole-5-carboxylate	2.65	level2			195.112	35.6	POS	1.40521e+07	1.55341e+07	2.41378e+07	1.48727e+07	1.85915e+07	1.4501e+07	2.09926e+07	1.22719e+07	2.15e+07	2.09689e+07	2.25458e+07	1.35476e+07	1.40185e+07	2.00797e+07	2.37743e+07	2.06626e+07	1.46426e+07	1.43195e+07	2.33747e+07	3.05323e+07	2.6101e+07	2.28796e+07	1.93511e+07	2.34601e+07	1.88645e+07	2.36703e+07	1.23408e+07	1.93057e+07
N-(2,3-Dimethylphenyl)-4-methylbenzenesulfonamide	2.65	level2			274.092	29.8	NEG	7.69174e+06	8.07847e+06	1.09899e+07	7.18925e+06	7.67128e+06	6.94581e+06	1.07216e+07	7.15027e+06	7.82777e+06	8.90374e+06	9.55726e+06	1.8227e+07	1.43892e+07	1.27425e+07	9.42493e+06	1.03441e+07	1.22794e+07	8.38256e+06	1.22834e+07	1.55502e+07	9.10725e+06	1.16144e+07	1.22996e+07	1.98604e+07	9.0298e+06	9.08714e+06	8.65903e+06	9.98952e+06
4-[(4-Methyl-1-piperazinyl)methyl]phenylamine	2.65	level2			206.164	28.1	POS	5.3863e+06	2.33683e+06	5.71794e+06	8.7297e+06	8.54933e+06	2.04888e+06	6.88528e+06	5.08798e+06	2.7064e+06	4.81396e+06	5.32464e+06	1.27486e+06	6.40607e+06	7.22402e+06	3.28176e+06	3.96154e+06	5.20256e+06	4.61384e+06	1.0338e+07	4.91855e+06	5.89934e+06	7.02981e+06	7.90916e+06	1.0735e+07	7.77621e+06	7.38022e+06	5.29177e+06	7.62499e+06
3-Methylindole	2.65	level2			132.08	27.9	POS	6.97942e+09	6.79543e+09	6.20999e+09	6.23709e+09	6.57565e+09	6.39918e+09	5.36094e+09	5.41965e+09	6.17188e+09	5.633e+09	5.58417e+09	5.16508e+09	5.03338e+09	5.04575e+09	5.22803e+09	5.06246e+09	5.32295e+09	5.58899e+09	5.91509e+09	5.78339e+09	5.98586e+09	5.5676e+09	5.77789e+09	5.19021e+09	5.76908e+09	5.58879e+09	6.18431e+09	5.72714e+09
4-[(4-Methylpiperazin-1-yl)methyl]benzoic acid	2.65	level2			235.143	25.5	POS	5.74582e+07	6.12496e+07	6.06103e+07	4.60443e+07	5.47688e+07	6.70312e+07	5.66653e+07	4.28761e+07	6.22355e+07	5.75741e+07	5.89149e+07	5.1176e+07	6.61229e+07	5.20918e+07	7.82982e+07	8.16453e+07	8.64045e+07	7.15919e+07	1.05846e+08	1.24207e+08	1.27265e+08	7.91288e+07	7.90364e+07	7.10223e+07	6.78227e+07	6.9052e+07	7.54291e+07	7.05622e+07
N-Formylaspartate	2.65	level2			160.024	23.4	NEG	3.15785e+06	2.06479e+06	3.96675e+06	1.85516e+06	2.73085e+06	3.27754e+06	3.1344e+06	3.20227e+06	4.97645e+06	3.86344e+06	4.35203e+06	3.65019e+06	4.23425e+06	3.9891e+06	4.66259e+06	2.94259e+06	2.75628e+06	6.13053e+06	4.99103e+06	4.70898e+06	4.09394e+06	7.23952e+06	8.22008e+06	6.53091e+06	4.167e+06	4.23354e+06	3.81029e+06	3.5529e+06
Tetraethylammonium cation	2.64	level2			130.158	354.4	POS	2.3086e+08	9.72378e+07	1.58562e+08	1.7329e+08	1.14618e+08	2.55784e+08	1.68619e+08	1.69198e+08	1.57719e+08	2.615e+08	1.05267e+08	1.44324e+08	1.1529e+08	1.26842e+08	1.7164e+08	1.54634e+08	9.90817e+07	1.03245e+08	2.65557e+08	1.73529e+08	2.54386e+08	1.14537e+08	1.12732e+08	1.99279e+08	1.07854e+08	2.34101e+08	1.56846e+08	1.59847e+08
1-Hexadecylpyridinium cation	2.64	level2			304.298	350.4	POS	2.08965e+06	2.09118e+06	3.19117e+06	2.9223e+06	3.548e+06	2.64423e+06	3.62447e+06	3.82454e+06	3.85602e+06	3.40349e+06	2.41496e+06	3.01916e+06	2.66967e+06	2.76801e+06	2.94907e+06	2.00201e+06	1.61036e+06	3.20085e+06	2.06483e+06	2.07646e+06	2.04966e+06	4.33151e+06	2.66761e+06	3.1176e+06	1.86943e+06	2.65682e+06	3.03654e+06	2.31497e+06
Bortezomib__	2.64	level2			383.188	336.5	NEG	1.11965e+06	846969	1.16033e+06	780488	822096	787160	1.08801e+06	1.57711e+06	888543	1.16709e+06	1.24416e+06	1.0259e+06	844606	631683	586483	836886	695433	613120	527510	426197	456501	774920	660230	1.06907e+06	956070	1.16052e+06	1.10589e+06	887017
2-(2-Hydroxypropan-2-yl)-4-methoxy-6-(2-phenylethyl)-2,3-dihydro-1-benzofuran-7-carboxylic acid	2.64	level2			355.156	321.4	NEG	2.33381e+06	2.89917e+06	2.43619e+06	2.61535e+06	2.37001e+06	2.68237e+06	3.23871e+06	4.18641e+06	3.6547e+06	3.25856e+06	3.08269e+06	2.95489e+06	2.47103e+06	2.6878e+06	3.19217e+06	3.00875e+06	2.61516e+06	3.18575e+06	1.96901e+06	1.87162e+06	2.65658e+06	3.37384e+06	2.66991e+06	3.0999e+06	2.91146e+06	2.86352e+06	2.44902e+06	3.27674e+06
(9E,11Z)-8-Hydroxyoctadeca-9,11-dienoic acid	2.64	level2			295.226	297.6	NEG	7.47027e+08	6.6658e+08	8.37396e+08	5.86547e+08	9.10484e+08	1.04399e+09	6.08747e+08	4.95961e+08	6.12701e+08	9.99038e+08	7.17962e+08	9.81448e+08	6.57137e+08	7.71294e+08	1.13217e+09	1.05343e+09	8.97227e+08	7.75942e+08	1.68789e+09	1.77696e+09	1.89841e+09	1.54208e+09	1.48031e+09	8.97575e+08	9.86685e+08	9.66406e+08	9.72371e+08	1.04288e+09
4-Decylpyridine	2.64	level2			220.205	294.3	POS	3.93728e+06	3.44195e+06	3.08018e+06	3.03026e+06	3.40677e+06	3.59244e+06	1.85048e+06	2.13532e+06	2.19564e+06	2.52941e+06	1.61253e+06	1.82948e+06	2.31132e+06	2.55066e+06	2.34008e+06	2.43089e+06	1.96689e+06	3.04606e+06	2.20666e+06	2.18096e+06	2.0639e+06	2.85287e+06	1.98517e+06	1.96892e+06	2.69282e+06	2.6967e+06	2.5565e+06	2.75513e+06
(22E,24R)-Stigmasta-4,22-diene-3,6-dione	2.64	level2			425.339	286.4	POS	5.76741e+06	1.07186e+07	6.87512e+06	8.05835e+06	4.51632e+06	6.27941e+06	5.18309e+06	4.80718e+06	7.06011e+06	6.05043e+06	6.07031e+06	4.99909e+06	1.03293e+07	8.34871e+06	9.31253e+06	1.08217e+07	9.60594e+06	1.15124e+07	9.81452e+06	1.16642e+07	9.84759e+06	1.38541e+07	9.6002e+06	6.87001e+06	6.52624e+06	7.3771e+06	7.33386e+06	7.01343e+06
1-(2,6,6-Trimethyl-2-cyclohexen-1-yl)-1,6-heptadien-3-one	2.64	level2			233.189	279.8	POS	4.24673e+07	1.62079e+07	1.69547e+07	4.48774e+07	5.71066e+07	1.68044e+07	3.91541e+07	4.89803e+07	3.84477e+07	4.31021e+07	1.43884e+07	4.10074e+07	2.99591e+07	1.12655e+07	1.30954e+07	1.07169e+07	8.30669e+06	9.36897e+06	1.19993e+07	3.32158e+07	3.44666e+07	3.26561e+07	3.5636e+07	1.24497e+07	1.31458e+07	1.6991e+07	3.58304e+07	3.96415e+07
Methandrostenolone	2.64	level2			301.215	279.1	POS	3.17708e+07	4.44795e+07	4.16161e+07	4.43623e+07	3.85462e+07	2.56523e+07	5.08446e+07	4.5651e+07	3.20076e+07	3.15633e+07	3.80132e+07	4.51044e+07	2.78193e+07	1.3485e+07	5.2652e+07	4.47933e+07	2.71973e+07	4.52506e+07	3.62704e+07	4.05954e+06	3.16588e+07	4.07818e+07	4.16048e+07	1.9509e+07	3.10763e+07	2.30309e+07	4.5235e+07	3.00747e+07
5-trans-Latanoprost acid	2.64	level2			389.231	277.1	NEG	1.3137e+07	1.2399e+07	1.52718e+07	1.58459e+07	1.6496e+07	1.72082e+07	1.74463e+07	2.15732e+07	2.45616e+07	2.16848e+07	1.68556e+07	1.98923e+07	6.28303e+06	6.28776e+06	8.95352e+06	5.04439e+06	4.42976e+06	4.82875e+06	1.0669e+07	1.11342e+07	1.06458e+07	1.38325e+07	1.39523e+07	1.09923e+07	1.30522e+07	1.29146e+07	1.23218e+07	1.29572e+07
Mulberrofuran_T	2.64	level2			717.304	276.1	POS	1.8659e+07	1.70359e+07	1.7942e+07	1.69008e+07	1.82038e+07	1.78761e+07	1.47594e+07	2.2264e+07	1.48905e+07	1.60426e+07	1.57681e+07	1.71216e+07	1.16245e+07	1.45731e+07	1.12955e+07	1.42031e+07	7.95381e+06	1.07454e+07	9.36389e+06	1.17434e+07	1.30997e+07	1.23287e+07	1.51433e+07	1.50551e+07	1.55722e+07	1.25393e+07	1.62199e+07	1.59785e+07
cis-5-Dodecenoic acid	2.64	level2			197.153	270.5	NEG	1.18984e+07	1.04352e+07	6.65257e+06	1.26235e+07	1.20199e+07	1.61383e+07	1.54984e+07	9.97195e+06	1.37924e+07	1.2056e+07	1.00448e+07	1.05971e+07	7.23816e+06	1.25325e+07	1.08316e+07	1.09282e+07	1.31972e+07	1.28414e+07	1.12057e+07	1.14835e+07	1.03574e+07	1.4815e+07	3.75287e+06	1.1815e+07	1.01368e+07	9.7951e+06	9.49783e+06	1.02328e+07
Gallacetophenone	2.64	level2			169.048	269.9	POS	8.66606e+07	6.44062e+07	8.60031e+07	3.49537e+07	1.1365e+08	8.83688e+07	2.90656e+07	3.59152e+07	8.32928e+07	7.34727e+07	7.13458e+07	3.04124e+07	7.73408e+07	2.85833e+07	2.83822e+07	7.10184e+07	2.15958e+07	2.69191e+07	6.69723e+07	4.62037e+07	6.6061e+07	7.42341e+07	7.70783e+07	2.61092e+07	7.54837e+07	2.79971e+07	2.85857e+07	8.00599e+07
Dibenzyl_ether	2.64	level2			199.111	267.3	POS	2.39746e+07	2.5927e+07	2.99205e+07	2.41107e+07	4.32399e+07	2.29159e+07	1.85715e+07	1.81039e+07	2.35525e+07	1.74918e+07	1.6659e+07	1.60604e+07	9.77432e+06	8.64997e+06	1.00923e+07	8.6161e+06	1.01291e+07	6.37296e+06	8.11138e+06	9.83928e+06	9.4036e+06	7.44075e+06	9.06845e+06	7.17847e+06	1.61703e+07	1.55947e+07	1.5392e+07	1.58396e+07
Canavalioside	2.64	level2			547.277	242.9	POS	3.00507e+06	4.03948e+06	1.06091e+06	2.78115e+06	3.49589e+06	2.31951e+06	5.83215e+06	3.71305e+06	3.52503e+06	2.62077e+06	4.27517e+06	1.50415e+06	4.76935e+06	3.61207e+06	4.92281e+06	5.1271e+06	4.20773e+06	5.85939e+06	5.90645e+06	3.42901e+06	4.67935e+06	1.03801e+07	8.15094e+06	8.96562e+06	4.6239e+06	4.24618e+06	3.82682e+06	4.61534e+06
Italicene_ether	2.64	level2			221.189	242.2	POS	1.13199e+07	1.12047e+07	1.1709e+07	9.613e+06	1.11095e+07	1.32078e+07	1.21791e+07	1.29232e+07	1.28587e+07	1.32746e+07	1.16762e+07	1.17492e+07	9.6032e+06	1.13699e+07	1.06365e+07	9.19812e+06	8.76217e+06	1.07834e+07	1.02274e+07	8.27356e+06	9.49328e+06	1.24062e+07	9.88471e+06	9.76045e+06	1.13915e+07	1.21156e+07	8.94002e+06	1.13705e+07
Dimethylbenzyl_carbinyl_hexanoate	2.64	level2			249.184	241.5	POS	1.60888e+07	2.15929e+07	2.03399e+07	2.08293e+07	3.38989e+07	1.96352e+07	2.18915e+07	2.43836e+07	2.38766e+07	2.24665e+07	1.89443e+07	2.74285e+07	2.2152e+07	2.01772e+07	2.56168e+07	2.00226e+07	1.93469e+07	2.19477e+07	1.79527e+07	1.72811e+07	1.63658e+07	1.64946e+07	1.80047e+07	2.46198e+07	1.98691e+07	1.94894e+07	1.95847e+07	2.10747e+07
4-Androstenediol	2.64	level2			291.23	238.2	POS	2.87557e+07	2.85849e+07	2.60531e+07	2.40114e+07	1.88454e+07	1.82019e+07	2.43661e+07	4.27649e+07	2.08005e+07	3.38388e+07	3.1524e+07	2.90188e+07	1.62053e+07	2.96201e+07	3.11404e+07	1.91451e+07	2.49294e+07	2.52851e+07	2.01988e+07	2.00984e+07	2.09304e+07	1.82156e+07	2.63569e+07	2.66244e+07	2.8653e+07	1.38243e+07	2.25772e+07	2.46618e+07
4-Ethoxy-4-oxobut-2-enoic acid	2.64	level2			143.034	236.4	NEG	8.4422e+06	8.40892e+06	9.83949e+06	1.84049e+07	9.91346e+06	7.96641e+06	2.21922e+07	9.37951e+06	1.13992e+07	1.09506e+07	2.0861e+07	9.9323e+06	8.04781e+06	8.71318e+06	7.62778e+06	7.0916e+06	7.42621e+06	7.04175e+06	1.54994e+07	7.0109e+06	1.47863e+07	7.3919e+06	1.64599e+07	7.66801e+06	8.64204e+06	1.86389e+07	8.52945e+06	8.56759e+06
11-cis-Dehydroretinal	2.64	level2			283.204	230.8	POS	4.3592e+07	4.68855e+07	5.01513e+07	4.95057e+07	6.50766e+07	4.52768e+07	6.39734e+07	5.73017e+07	5.86988e+07	4.96239e+07	4.81103e+07	4.94833e+07	3.85982e+07	3.61169e+07	4.61074e+07	3.7873e+07	2.96684e+07	3.64514e+07	2.72619e+07	3.28214e+07	2.53785e+07	2.87699e+07	3.17372e+07	4.00638e+07	4.13874e+07	4.18182e+07	4.1482e+07	4.27375e+07
3-(2-Methyl-3-oxo-2,5,6,7,8,8a-hexahydro-1H-naphthalen-1-yl)propanoic acid	2.64	level2			235.132	230.2	NEG	3.36564e+07	3.6777e+07	3.10882e+07	3.54952e+07	3.15342e+07	3.28662e+07	2.70284e+07	2.57343e+07	4.51792e+07	3.78019e+07	3.03657e+07	3.014e+07	1.28147e+07	1.78346e+07	1.39369e+07	1.12943e+07	1.33118e+07	1.09597e+07	1.71884e+07	1.99579e+07	1.95642e+07	1.11488e+07	1.89376e+07	1.05161e+07	2.35998e+07	2.24947e+07	2.29591e+07	2.31573e+07
4,6-Di(1-piperidinyl)-1,3,5-triazin-2-amine	2.64	level2			263.199	227.6	POS	1.98658e+07	2.07548e+07	4.5661e+07	3.38724e+07	2.13146e+07	1.98977e+07	2.09692e+07	1.76659e+07	1.61792e+07	1.65656e+07	1.87829e+07	1.7968e+07	2.80717e+07	1.85674e+07	4.09076e+07	1.84588e+07	1.78056e+07	1.90383e+07	2.06211e+07	1.7839e+07	1.714e+07	1.90483e+07	4.26351e+07	2.13173e+07	1.95364e+07	1.85004e+07	2.00613e+07	1.91795e+07
Hypoglycin	2.64	level2			142.085	215.7	POS	2.9998e+06	3.68241e+06	4.0789e+06	2.74374e+06	5.40724e+06	3.0048e+06	4.48598e+06	4.71152e+06	4.78086e+06	4.12933e+06	3.51177e+06	4.58425e+06	2.75165e+06	2.65918e+06	2.76557e+06	1.82494e+06	1.84383e+06	2.35133e+06	2.413e+06	2.38542e+06	1.98004e+06	1.95903e+06	2.23553e+06	2.5585e+06	2.81838e+06	3.30402e+06	3.07369e+06	3.04296e+06
6-Amino-3-methyl-3H-naphtho[1,2,3-de]quinoline-2,7-dione	2.64	level2			277.096	213.8	POS	3.85801e+06	2.24388e+06	1.17486e+06	860785	0	4.72717e+06	4.54625e+06	1.21194e+07	4.12467e+06	7.30249e+06	5.43949e+06	2.64057e+06	6.64131e+06	5.89498e+06	5.93234e+06	5.28773e+06	5.55106e+06	1.67666e+07	3.73727e+06	3.35694e+06	5.76892e+06	1.70431e+07	1.19574e+07	4.70449e+06	6.37691e+06	6.48549e+06	6.27566e+06	6.09545e+06
2-Hydroxy-7-methylquinoline-3-carbaldehyde	2.64	level2			186.055	211.8	NEG	2.67523e+06	2.21821e+06	2.98717e+06	3.08739e+06	2.52099e+06	3.69036e+06	2.83741e+06	2.27101e+06	4.36348e+06	3.94516e+06	2.17565e+06	4.31288e+06	1.67826e+06	2.0435e+06	1.40212e+06	1.42941e+06	1.17922e+06	1.67586e+06	3.61411e+06	4.05445e+06	3.89381e+06	2.90679e+06	2.47976e+06	2.30567e+06	2.85177e+06	3.0168e+06	2.62811e+06	2.58489e+06
1-(4-(7H-Purin-6-yl)morpholin-2-yl)methanamine	2.64	level2			235.132	211.7	POS	1.27335e+08	1.18213e+08	1.17089e+08	1.00812e+08	9.96624e+07	1.33854e+08	1.2009e+08	9.93702e+07	1.16343e+08	1.14074e+08	1.27572e+08	1.10303e+08	2.11047e+08	1.55153e+08	1.5258e+08	1.38129e+08	1.40973e+08	1.40151e+08	1.28752e+08	1.21415e+08	1.27289e+08	1.08703e+08	9.12105e+07	9.20737e+07	1.19092e+08	1.21567e+08	1.23953e+08	1.23179e+08
4-tert-Butylphenol	2.64	level2			151.111	206.5	POS	1.59341e+07	1.41682e+07	1.91132e+07	1.23282e+07	1.41244e+07	1.73938e+07	1.62743e+07	1.33801e+07	1.36189e+07	1.18996e+07	1.30808e+07	1.20059e+07	1.54703e+07	1.29607e+07	1.55037e+07	1.40359e+07	1.37145e+07	1.13527e+07	1.41708e+07	1.49641e+07	1.40759e+07	1.12585e+07	1.09554e+07	1.35883e+07	1.91619e+07	1.34001e+07	1.74449e+07	1.54516e+07
Isoamyl_p-anisate	2.64	level2			223.132	206.5	POS	1.11381e+07	1.43162e+07	1.59062e+07	1.20065e+07	1.27403e+07	1.32202e+07	1.44901e+07	8.73715e+06	1.57764e+07	1.50747e+07	1.65051e+07	1.48391e+07	1.72747e+07	1.80265e+07	1.78055e+07	1.87598e+07	1.59717e+07	1.21104e+07	1.83209e+07	1.59719e+07	1.80652e+07	1.91997e+07	1.47161e+07	2.07083e+07	1.4711e+07	1.47901e+07	1.47669e+07	1.5971e+07
3-Cyano-4,7-dimethylcoumarin	2.64	level2			200.069	199.2	POS	3.41439e+07	3.22671e+07	3.07327e+07	2.84236e+07	2.92871e+07	3.07466e+07	3.41728e+07	5.05757e+07	3.65262e+07	4.50897e+07	3.67413e+07	3.47964e+07	2.80013e+07	3.50852e+07	2.34581e+07	1.87482e+07	2.6228e+07	3.25244e+07	1.33557e+07	9.96677e+06	1.05513e+07	3.89012e+07	2.84674e+07	4.19843e+07	2.98885e+07	2.96155e+07	2.97105e+07	3.07546e+07
2-Methoxy-4-propylphenol	2.64	level2			167.106	197.9	POS	1.86404e+07	1.77663e+07	1.7172e+07	1.50217e+07	1.69976e+07	1.81636e+07	1.6145e+07	1.51604e+07	1.71239e+07	2.69101e+07	1.64471e+07	1.52961e+07	1.83253e+07	2.16944e+07	3.59584e+07	1.81866e+07	1.74973e+07	1.86361e+07	1.8955e+07	1.83176e+07	1.97879e+07	2.53243e+07	1.56747e+07	1.60845e+07	2.82896e+07	1.76449e+07	1.72957e+07	1.81965e+07
1,4-Dihydrocyclopenta[b]indol-3(2H)-one	2.64	level2			172.075	197.9	POS	1.17348e+07	1.27302e+07	9.87333e+06	1.11214e+07	9.97156e+06	1.28468e+07	2.06566e+07	3.03673e+07	1.62431e+07	2.66042e+07	1.734e+07	1.58943e+07	1.38036e+07	1.13792e+07	1.46775e+07	7.6284e+06	1.30053e+07	2.10922e+07	1.09872e+07	8.28945e+06	8.85399e+06	3.19919e+07	2.36239e+07	2.39189e+07	1.52691e+07	1.61939e+07	1.6059e+07	1.61832e+07
Cinncassiol_D4	2.64	level2			353.231	196.9	POS	1.83075e+07	1.84815e+07	1.84487e+07	2.14536e+07	2.41096e+07	1.80149e+07	2.16468e+07	2.0571e+07	1.92807e+07	2.00881e+07	1.85199e+07	2.36023e+07	1.9812e+07	2.19495e+07	6.45003e+06	6.79054e+06	1.695e+07	1.90466e+07	3.30579e+06	1.82871e+07	1.56281e+07	3.41142e+06	1.56701e+07	2.60043e+07	1.89878e+07	2.00533e+07	1.91822e+07	1.86088e+07
Gartanin	2.64	level2			397.162	184.7	POS	5.92482e+06	6.57034e+06	5.92255e+06	5.75283e+06	5.77526e+06	5.93319e+06	7.5114e+06	6.93404e+06	7.82734e+06	7.25125e+06	8.42987e+06	6.95515e+06	5.12962e+06	5.33799e+06	5.23753e+06	4.8363e+06	4.64848e+06	5.05096e+06	2.86866e+06	2.17148e+06	2.74757e+06	4.37954e+06	3.39572e+06	4.42538e+06	4.68998e+06	5.35101e+06	5.38789e+06	5.4289e+06
1,4-Diamino-2-nitroanthraquinone	2.64	level2			284.065	183.1	POS	1.32759e+07	1.3269e+07	1.13475e+07	1.29387e+07	1.04852e+07	1.25988e+07	1.29936e+07	1.40088e+07	1.36239e+07	1.47057e+07	1.12209e+07	1.33863e+07	6.88159e+06	8.64145e+06	3.71992e+06	3.66807e+06	4.79414e+06	7.3571e+06	2.87115e+06	2.32873e+06	2.22083e+06	5.43035e+06	4.55689e+06	5.65537e+06	8.85091e+06	8.19062e+06	8.46404e+06	8.65418e+06
Desoxyrhaponticin	2.64	level2			405.153	182	POS	6.77984e+06	7.63438e+06	6.81163e+06	6.42811e+06	8.05848e+06	6.10816e+06	1.04645e+07	7.8977e+06	1.02543e+07	9.16767e+06	1.06604e+07	9.7271e+06	7.57428e+06	1.00034e+07	6.43609e+06	6.35995e+06	6.98791e+06	6.91124e+06	4.78817e+06	4.44189e+06	4.48037e+06	5.39374e+06	4.79536e+06	8.55828e+06	6.5029e+06	7.30346e+06	7.42676e+06	6.63706e+06
Acetamiprid	2.64	level2			223.073	180	POS	3.74783e+07	2.35707e+07	4.08665e+07	2.68414e+07	1.55059e+07	4.13098e+07	9.96799e+06	8.68061e+06	1.01691e+07	1.13417e+07	1.06473e+07	9.69636e+06	9.84766e+06	1.05343e+07	1.35051e+07	1.0253e+07	9.38898e+06	9.12706e+06	1.11972e+07	1.28898e+07	1.2078e+07	1.07782e+07	1.01084e+07	1.27224e+07	1.26748e+07	1.26361e+07	1.04917e+07	1.21575e+07
2-Phenylpropionaldehyde_dimethyl_acetal	2.64	level2			181.121	174.9	POS	4.72853e+07	4.79086e+07	3.09036e+07	4.19707e+07	4.37521e+07	5.19502e+07	2.58822e+07	2.13751e+07	5.06735e+07	4.67809e+07	1.45825e+07	4.52338e+07	4.59642e+07	1.01851e+08	4.75986e+07	4.14823e+07	4.04355e+07	2.37559e+07	3.17814e+07	3.07887e+07	4.94534e+07	4.14969e+07	2.44329e+07	2.64776e+07	9.00175e+07	9.32068e+07	4.48413e+07	4.57954e+07
D617	2.64	level2			291.205	174.7	POS	7.86119e+08	7.71901e+08	5.37867e+08	6.24894e+08	1.64094e+09	7.60391e+08	6.06138e+08	7.42063e+08	8.0435e+08	9.31631e+08	8.36255e+08	5.77385e+08	6.91492e+08	1.04955e+09	1.10347e+09	1.52062e+09	1.25062e+09	1.40571e+09	1.5393e+09	1.78702e+09	2.39341e+09	1.32431e+09	1.32958e+09	8.61454e+08	1.07109e+09	1.08093e+09	1.07795e+09	1.08663e+09
(2S)-((6-O-Pentopyranosylhexopyranosyl)oxy)(phenyl)acetonitrile	2.64	level2			428.157	172.5	POS	8.55654e+06	1.04873e+07	8.10968e+06	7.15752e+06	8.20009e+06	8.45456e+06	6.09983e+06	4.21673e+06	7.32024e+06	6.96044e+06	5.67218e+06	5.78305e+06	6.44188e+06	3.57489e+06	4.41096e+06	4.96041e+06	6.17864e+06	6.0175e+06	7.85405e+06	8.12604e+06	6.30473e+06	8.48565e+06	7.37571e+06	8.07262e+06	5.73242e+06	7.3095e+06	6.37719e+06	5.9765e+06
3-Hydroxyglutaric acid	2.64	level2			147.029	169	NEG	1.95492e+08	1.05844e+08	1.90229e+08	1.89079e+08	1.54785e+08	1.33145e+08	2.12058e+08	2.02748e+08	1.7156e+08	1.60694e+08	2.26198e+08	9.41269e+07	1.25871e+08	2.64339e+08	1.24183e+08	1.43193e+08	8.37252e+07	1.26062e+08	7.44333e+07	1.34736e+08	1.78442e+08	8.17199e+07	1.29458e+08	7.74221e+07	9.47055e+07	1.69833e+08	9.19476e+07	1.91612e+08
Imidacloprid urea	2.64	level2			212.057	166.2	POS	380722	814458	649695	819997	791434	1.00452e+06	741129	481354	841156	510366	672054	436077	3.83182e+07	4.53233e+07	1.8874e+07	2.63341e+07	2.0777e+07	3.11372e+07	2.95795e+07	2.4585e+07	1.4757e+07	1.64311e+07	1.02211e+07	3.03375e+07	1.27314e+07	1.27804e+07	1.2874e+07	1.22476e+07
2-(1H-Indol-1-yl)acetamide	2.64	level2			175.085	165.5	POS	1.11778e+07	1.10319e+07	1.14394e+07	1.02621e+07	8.60738e+06	1.06274e+07	1.21831e+07	1.53971e+07	1.47876e+07	1.59795e+07	1.24606e+07	1.39134e+07	1.04332e+07	1.03941e+07	1.25586e+07	9.97089e+06	1.05112e+07	1.09766e+07	1.02925e+07	9.81401e+06	9.62972e+06	9.83395e+06	9.22008e+06	1.14116e+07	9.06947e+06	9.46885e+06	9.64781e+06	9.17031e+06
1-Methyl-5-phenyl-1H-pyrazole-3-carbaldehyde	2.64	level2			187.085	163.7	POS	4.14342e+07	4.33342e+07	4.0822e+07	4.46539e+07	4.10498e+07	4.57276e+07	3.54637e+07	3.57346e+07	5.12421e+07	4.56366e+07	3.79374e+07	4.42434e+07	3.13378e+07	3.18541e+07	3.10831e+07	3.99762e+07	3.67085e+07	3.58707e+07	4.55521e+07	5.47979e+07	6.89708e+07	3.17305e+07	3.18943e+07	3.01909e+07	3.82359e+07	3.79832e+07	3.84897e+07	3.92894e+07
Dihydrophaseic acid	2.64	level2			281.138	163.7	NEG	2.04726e+07	2.48468e+07	2.14855e+07	2.12059e+07	2.42842e+07	2.25514e+07	3.09906e+07	2.57929e+07	2.9763e+07	3.08027e+07	2.73867e+07	3.55582e+07	2.77632e+07	2.80484e+07	3.36337e+07	3.32282e+07	2.7455e+07	2.68345e+07	2.46521e+07	2.62619e+07	2.58725e+07	2.40701e+07	2.26301e+07	2.61076e+07	2.77021e+07	2.76035e+07	2.69135e+07	2.69583e+07
N-Acetyl-D-tryptophanamide	2.64	level2			244.108	160.7	NEG	2.95705e+07	2.63685e+07	1.96178e+07	2.36906e+07	2.35009e+07	3.01413e+07	1.87348e+07	2.67162e+07	1.63576e+07	1.91091e+07	2.12065e+07	9.82385e+06	1.43848e+07	2.07123e+07	1.42286e+07	1.5501e+07	1.6745e+07	2.58057e+07	2.97477e+07	1.88878e+07	2.86001e+07	3.04528e+07	3.06818e+07	2.64085e+07	2.51951e+07	2.00363e+07	2.51202e+07	2.50893e+07
4-methoxy-6-[2-(4-methoxyphenyl)ethyl]pyran-2-one	2.64	level2			259.118	156	NEG	8.80581e+07	8.3444e+07	9.89814e+07	7.09948e+07	7.1373e+07	1.05307e+08	7.22168e+07	5.85742e+07	1.02771e+08	7.00055e+07	6.38952e+07	6.87628e+07	1.33579e+08	1.18379e+08	1.65406e+08	1.40984e+08	1.1797e+08	1.32814e+08	1.59896e+08	1.53957e+08	1.27802e+08	1.24485e+08	9.01808e+07	8.42123e+07	9.67636e+07	9.37393e+07	1.22128e+08	1.32235e+08
Thioproperazine	2.64	level2			447.191	153	POS	1.72088e+06	2.94711e+06	1.06479e+06	2.75083e+06	834127	1.75375e+06	1.66314e+06	2.06966e+06	1.52282e+06	1.16657e+06	1.17926e+06	993689	1.70754e+06	2.02727e+06	2.2757e+06	1.36412e+06	1.78638e+06	2.8731e+06	2.25298e+06	1.78255e+06	2.20086e+06	4.14947e+06	3.32925e+06	2.95205e+06	1.4591e+06	2.26226e+06	1.72357e+06	1.76464e+06
2-Amino-2,3-dihydro-1H-indene-2-carboxylic acid	2.64	level2			178.085	152.4	POS	5.59964e+06	4.98736e+06	8.224e+06	5.21329e+06	6.14361e+06	4.99861e+06	5.49693e+06	6.20805e+06	5.94981e+06	6.52818e+06	6.77837e+06	7.62183e+06	2.79701e+06	3.29522e+06	3.15945e+06	3.95134e+06	4.35087e+06	2.91426e+06	2.76452e+06	4.18333e+06	3.90466e+06	5.28957e+06	2.77404e+06	4.66325e+06	4.60936e+06	4.03525e+06	4.85557e+06	4.91091e+06
6,7,8,9,10,11-Hexahydro-5H-cycloocta[b]indole	2.64	level2			200.142	151	POS	2.65259e+07	2.8995e+07	3.30348e+07	3.01241e+07	3.28954e+07	2.69539e+07	4.8473e+07	4.384e+07	6.41051e+07	4.86209e+07	4.43974e+07	4.36252e+07	2.79649e+07	2.8329e+07	2.14796e+07	1.5664e+07	1.60889e+07	1.79692e+07	1.84661e+07	1.80803e+07	1.38991e+07	1.88562e+07	1.961e+07	2.54267e+07	2.83603e+07	2.90288e+07	2.8392e+07	2.9713e+07
Flunitrazepam	2.64	level2			314.113	145.7	POS	1.19268e+07	1.32838e+07	1.07849e+07	1.40586e+07	1.21509e+07	1.63553e+07	1.18832e+07	1.22065e+07	7.44859e+06	7.28074e+06	7.12541e+06	6.85745e+06	7.69507e+06	7.63856e+06	1.37768e+07	5.89807e+06	8.42899e+06	9.80122e+06	1.20668e+07	8.09536e+06	7.45462e+06	1.90865e+07	1.45042e+07	2.34188e+07	1.15997e+07	1.34572e+07	1.26344e+07	1.25034e+07
1,2-Dimethyl-5-(trifluoromethyl)-1H-benzimidazole	2.64	level2			215.081	145.1	POS	5.74251e+07	5.84397e+07	4.64551e+07	5.56516e+07	3.96703e+07	5.62684e+07	5.24201e+07	6.35265e+07	5.54297e+07	6.21989e+07	5.03609e+07	4.46443e+07	3.7612e+07	3.58178e+07	3.32449e+07	2.63943e+07	3.28498e+07	3.79383e+07	4.59444e+07	4.16595e+07	4.17439e+07	5.50491e+07	4.65277e+07	5.72741e+07	4.58721e+07	4.93672e+07	5.57262e+07	4.86074e+07
Carotamine	2.64	level2			272.102	145.1	POS	2.97629e+07	2.1854e+07	1.88405e+07	1.63403e+07	4.01666e+07	3.13755e+07	3.87214e+07	8.19924e+07	2.22279e+07	4.26899e+07	3.62441e+07	2.12677e+07	4.27464e+07	4.48212e+07	5.80968e+07	4.7911e+07	4.68765e+07	8.73464e+07	3.77401e+07	3.4955e+07	5.34415e+07	8.99343e+07	7.19516e+07	3.929e+07	4.53603e+07	4.47192e+07	4.59429e+07	4.62391e+07
9H-Purine-2,6-diamine, N6-(1R,2S,4S)-bicyclo[2.2.1]hept-2-yl-N2-phenyl-, rel-	2.64	level2			321.18	144.9	POS	1.16637e+07	9.49797e+06	1.39042e+07	1.02506e+07	1.13289e+07	1.12754e+07	9.72469e+06	7.74518e+06	8.96684e+06	1.47611e+07	7.47079e+06	9.5578e+06	1.0889e+07	1.73305e+07	1.25893e+07	1.2313e+07	1.23972e+07	1.26279e+07	1.55573e+07	1.64264e+07	2.43093e+07	1.33118e+07	1.76972e+07	1.73536e+07	1.61645e+07	1.10144e+07	1.12751e+07	1.24701e+07
N-(4-Hydroxy-2-methyl-6-quinolinyl)acetamide	2.64	level2			217.096	142.1	POS	3.24561e+08	3.33892e+08	3.90528e+08	3.29825e+08	3.2805e+08	3.40598e+08	3.29229e+08	4.31527e+08	4.22871e+08	4.12058e+08	4.13472e+08	3.52763e+08	2.74732e+08	2.78224e+08	2.10623e+08	1.95345e+08	2.36617e+08	3.15468e+08	2.1263e+08	2.06225e+08	1.61995e+08	2.37402e+08	2.21131e+08	2.61062e+08	2.94437e+08	2.98156e+08	2.99569e+08	2.9431e+08
(+)-Muscarine cation	2.64	level2			174.148	137.2	POS	1.04081e+08	1.13888e+08	1.2744e+08	7.84956e+07	1.0653e+08	9.31558e+07	2.08838e+08	2.97815e+08	2.40695e+08	3.26301e+08	3.49041e+08	2.19731e+08	1.17213e+08	9.18405e+07	9.12746e+07	5.54956e+07	6.61274e+07	6.69404e+07	4.53162e+07	2.71658e+07	3.19439e+07	1.14976e+08	9.45303e+07	1.00982e+08	1.21586e+08	1.25691e+08	1.2805e+08	1.32646e+08
2-(3-Hydroxypropyl)-1H-isoindole-1,3(2H)-dione	2.64	level2			206.08	134.3	POS	5.38575e+07	8.88583e+07	7.90692e+07	9.68408e+07	5.11556e+07	7.03494e+07	1.3229e+08	1.38543e+08	7.71809e+07	1.05322e+08	1.06041e+08	1.37488e+08	1.46778e+08	1.56878e+08	1.0322e+08	1.12277e+08	1.58654e+08	1.39119e+08	1.36184e+08	1.32834e+08	1.50422e+08	1.68784e+08	1.90224e+08	2.44182e+08	1.09983e+08	1.16281e+08	1.0248e+08	1.17304e+08
Resokaempferol	2.64	level2			271.058	133.3	POS	2.44565e+07	3.03959e+07	2.97775e+07	2.95495e+07	2.55803e+07	3.77107e+07	5.24985e+07	3.57297e+07	5.2685e+07	5.37555e+07	5.39415e+07	5.01914e+07	5.18663e+07	6.32992e+07	4.54417e+07	4.48381e+07	4.61916e+07	6.08698e+07	5.01253e+07	4.42149e+07	4.54724e+07	5.24563e+07	4.32329e+07	5.98307e+07	4.07871e+07	3.90221e+07	3.7391e+07	4.47565e+07
Ponatinib	2.64	level2			531.216	128.9	NEG	2.25751e+06	2.51898e+06	2.15176e+06	5.31967e+06	1.3934e+06	1.93653e+06	1.65926e+06	2.52491e+06	1.14109e+06	1.65143e+06	1.73169e+06	1.5319e+06	2.34766e+06	2.02285e+06	1.41835e+06	637659	1.68767e+06	2.20287e+06	3.0068e+06	1.65059e+06	1.65167e+06	2.16211e+06	2.37081e+06	2.30656e+06	2.20627e+06	1.83398e+06	1.96317e+06	1.53526e+06
Pindolol	2.64	level2			249.159	83.6	POS	0	449858	0	0	847698	0	462201	0	217866	1.24114e+06	1.01545e+06	1.70584e+06	890791	1.60012e+07	906885	929728	0	0	1.38362e+07	1.47657e+06	1.22726e+06	0	1.97903e+06	1.90467e+06	1.20038e+06	1.13771e+06	2.94599e+06	1.1749e+06
4,5-Dimethyl-2-heptyloxazole	2.64	level2			196.169	65	POS	2.2287e+07	2.42169e+07	1.96289e+07	3.7818e+07	2.82079e+07	2.17809e+07	2.83965e+07	6.29555e+07	2.91369e+07	5.41563e+07	2.2243e+07	7.99855e+06	3.93026e+07	2.27292e+07	4.79606e+07	3.55153e+07	3.47951e+07	4.51376e+07	2.43243e+07	1.83472e+07	9.65564e+06	1.96385e+07	1.3337e+07	1.26394e+07	4.25323e+07	4.1321e+07	2.17266e+07	1.94491e+07
4-Aminoantipyrin	2.64	level2			204.112	47.3	POS	1.13933e+08	1.06322e+08	9.90581e+07	8.51499e+07	7.8208e+07	1.08186e+08	1.15924e+08	1.24071e+08	1.48977e+08	1.39169e+08	1.09905e+08	1.09598e+08	1.13034e+08	1.25887e+08	1.01364e+08	7.3132e+07	8.50561e+07	1.05983e+08	1.11173e+08	1.03287e+08	1.13407e+08	9.36848e+07	1.06617e+08	1.06458e+08	1.04985e+08	1.07698e+08	1.07897e+08	1.05961e+08
4,5-Dimethoxy-2,3-dihydro-1H-isoindole-1,3-dione	2.64	level2			206.045	45.8	NEG	3.93387e+06	4.99043e+06	7.11712e+06	4.75629e+06	3.97784e+06	5.14947e+06	5.47633e+06	7.46928e+06	7.6837e+06	9.38164e+06	6.15798e+06	1.56675e+07	5.22462e+06	5.55684e+06	3.39168e+06	1.78053e+06	2.51547e+06	3.15611e+06	7.74688e+06	7.56933e+06	5.87513e+06	4.07396e+06	5.66272e+06	5.71502e+06	7.02209e+06	4.18005e+06	5.04173e+06	5.54701e+06
1-(2-Furanylmethyl)-5-oxo-3-pyrrolidinecarboxylic acid	2.64	level2			208.06	45.5	NEG	7.51792e+06	7.66095e+06	7.6002e+06	6.23217e+06	8.48283e+06	6.12293e+06	7.97364e+06	6.41536e+06	9.69925e+06	7.32769e+06	9.75018e+06	8.40708e+06	4.86731e+06	4.66541e+06	5.63451e+06	4.3361e+06	4.68395e+06	5.45714e+06	3.63807e+06	3.84871e+06	3.86215e+06	3.6225e+06	3.36249e+06	4.14083e+06	5.65149e+06	5.85573e+06	5.495e+06	5.93634e+06
L-N-(1H-Indol-3-ylacetyl)glutamic_acid	2.64	level2			305.112	37.2	POS	1.08087e+07	6.19644e+06	6.92493e+06	4.09414e+06	8.89341e+06	8.49121e+06	1.00912e+07	1.93997e+07	6.58631e+06	1.13416e+07	1.22009e+07	1.06353e+07	2.29662e+07	1.99703e+07	2.77895e+07	2.33581e+07	2.85714e+07	4.8916e+07	2.27667e+07	2.52127e+07	2.74276e+07	5.04809e+07	3.16071e+07	1.18295e+07	1.67175e+07	1.42344e+07	1.67242e+07	2.15441e+07
PRI_260.1759_12.9	2.64	level2			260.175	33.2	POS	3.0658e+07	1.12923e+07	1.28164e+07	8.7197e+06	1.1891e+07	1.61911e+07	3.87719e+06	4.01161e+06	8.30557e+06	3.75201e+06	2.6195e+06	1.78103e+06	3.64945e+06	2.35014e+06	5.5903e+06	6.30827e+06	9.4856e+06	1.14714e+07	1.86678e+07	2.11697e+07	4.24149e+07	1.15371e+07	1.3153e+07	8.14738e+06	1.09454e+07	1.09104e+07	1.1161e+07	1.12988e+07
Santinamide cation	2.64	level2			193.132	26.5	POS	1.6527e+07	1.74094e+07	3.31208e+07	1.56447e+07	1.94403e+07	2.12949e+07	3.38039e+07	4.40496e+07	3.00332e+07	2.59251e+07	2.39787e+07	3.12286e+07	5.12222e+07	2.97306e+07	6.75033e+07	4.93065e+07	3.60483e+07	5.28781e+07	3.14293e+07	5.03103e+07	4.10645e+07	4.44725e+07	3.82413e+07	2.31141e+07	4.30172e+07	4.63986e+07	4.63625e+07	4.95335e+07
Isovalerylsarcosine	2.64	level2			174.112	25.1	POS	4.02755e+06	1.31714e+07	1.23107e+07	6.29515e+06	1.19828e+07	1.33737e+07	1.33652e+07	8.50695e+06	1.14845e+07	1.15561e+07	1.3344e+07	1.50764e+07	1.20038e+07	9.61143e+06	1.60524e+07	1.81538e+07	1.64219e+07	1.33061e+07	1.52077e+07	8.98323e+06	1.79497e+07	1.68342e+07	1.05451e+07	1.44784e+07	1.41481e+07	1.81962e+07	1.46482e+07	1.12552e+07
1-Methyl-4-benzylpiperazine	2.64	level2			191.153	23.8	POS	8.01934e+06	7.0306e+06	1.7911e+07	5.49665e+06	4.61326e+06	8.53105e+06	2.19387e+06	967042	4.78639e+06	4.8437e+06	2.43443e+06	2.91899e+06	2.06581e+07	1.40851e+07	9.87283e+06	3.25948e+06	4.16946e+06	2.59843e+07	1.06771e+07	1.20723e+07	1.51965e+07	1.91021e+07	5.4299e+06	2.869e+07	5.67472e+06	4.95404e+06	5.94206e+06	7.94264e+06
2-Methylpropanamine	2.64	level2			74.0961	3.6	POS	9.65402e+06	9.00039e+06	9.66558e+06	1.11642e+07	9.83991e+06	9.13179e+06	9.80564e+06	1.01803e+07	1.4199e+07	9.89861e+06	9.92082e+06	9.51435e+06	9.87042e+06	1.02948e+07	9.93221e+06	1.0458e+07	9.6179e+06	1.01153e+07	1.03555e+07	9.52371e+06	1.02273e+07	1.05506e+07	1.02735e+07	9.44102e+06	1.21182e+07	1.00371e+07	1.07351e+07	1.04008e+07
Butyl isobutyl phthalate	2.64	level2			279.157	349.2	POS	7.04819e+06	8.52979e+06	5.26484e+06	5.70019e+06	6.35163e+06	559728	5.83714e+06	1.06138e+07	6.09561e+06	5.52103e+06	1.24281e+07	6.80304e+06	5.85198e+06	5.53234e+06	5.27816e+06	5.17724e+06	4.83325e+06	5.27396e+06	5.19169e+06	5.1726e+06	5.04016e+06	6.7233e+06	6.49426e+06	6.44948e+06	5.3656e+06	5.77058e+06	5.66719e+06	5.3814e+06
1-Palmitoyllysophosphatidate	2.64	level2			409.234	312.1	NEG	2.6873e+07	3.27309e+07	3.45958e+07	2.80657e+07	3.90414e+07	4.10609e+07	3.55351e+07	3.83618e+07	2.75201e+07	3.89876e+07	4.01001e+07	3.59263e+07	3.09052e+07	3.33509e+07	4.16162e+07	4.18853e+07	3.62917e+07	2.93275e+07	3.45427e+07	3.77201e+07	3.40978e+07	4.41223e+07	4.28686e+07	3.83092e+07	3.88224e+07	3.99131e+07	3.47167e+07	3.36923e+07
Maltol	2.64	level2			109.028	269.9	POS	1.92675e+07	5.46352e+07	2.64714e+07	5.91853e+07	3.12534e+07	2.71801e+07	2.48518e+07	3.48074e+07	2.49433e+07	2.60899e+07	4.28884e+07	2.59622e+07	6.78521e+07	6.80071e+07	2.40533e+07	2.35523e+07	1.95657e+07	2.7051e+07	2.81551e+07	2.7735e+07	2.16891e+07	3.59948e+07	2.71009e+07	2.54238e+07	2.50373e+07	2.49758e+07	2.51891e+07	6.86565e+07
Edaravone	2.64	level2			175.085	61.7	POS	7.98352e+07	5.61833e+07	7.97561e+07	7.80503e+07	7.02497e+07	7.89621e+07	8.58195e+07	1.13515e+08	6.90372e+07	5.68104e+07	8.77391e+07	6.04759e+07	5.34801e+07	5.21723e+07	4.65496e+07	2.9718e+07	5.68222e+07	7.92393e+07	4.16061e+07	4.12009e+07	5.1116e+07	1.31614e+08	9.14116e+07	1.1003e+08	4.7784e+07	7.85794e+07	9.01742e+07	8.67438e+07
6-(2-Pyridinyl)-1,3,5-triazine-2,4-diamine	2.63	level2			189.09	331.9	POS	1.34216e+06	2.27913e+06	4.106e+06	1.53604e+06	1.00086e+06	3.14502e+06	1.99303e+06	150258	885262	1.38326e+06	1.84826e+06	2.91116e+06	3.04418e+06	1.33152e+06	3.11114e+06	2.48615e+06	3.45604e+06	1.61662e+06	3.70686e+06	3.19674e+06	2.45372e+06	1.18739e+06	814298	3.01317e+06	1.47915e+06	2.05639e+06	2.62438e+06	888670
Bis(2-ethylhexyl) adipate	2.63	level2			371.313	325.2	POS	1.68147e+06	1.42456e+06	1.59611e+06	1.50022e+06	1.76933e+06	1.42413e+06	1.91638e+06	1.77991e+06	2.25782e+06	1.72339e+06	1.86213e+06	1.73665e+06	1.87712e+06	2.19219e+06	1.32894e+06	1.34195e+06	1.39691e+06	1.36919e+06	1.8338e+06	1.61854e+06	1.59225e+06	1.66933e+06	1.72583e+06	1.70208e+06	1.59304e+06	1.72456e+06	1.70619e+06	1.5591e+06
N-Oleoyl-Phenylalanine	2.63	level2			428.314	317.5	NEG	1.5284e+07	1.52048e+07	1.43486e+07	1.93009e+07	1.03542e+07	1.39535e+07	2.26748e+07	3.17431e+07	2.10176e+07	2.62135e+07	1.97461e+07	1.87915e+07	2.21219e+07	2.86749e+07	1.2776e+07	8.88287e+06	1.53125e+07	2.68445e+07	7.32304e+06	8.3617e+06	6.86406e+06	1.85927e+07	1.49554e+07	1.67517e+07	1.59785e+07	1.67796e+07	1.75982e+07	1.75909e+07
Pheophorbide a	2.63	level2			591.257	302.1	NEG	1.01573e+07	1.06165e+07	1.43227e+07	8.21154e+06	1.30585e+07	9.47593e+06	1.29623e+07	1.53935e+07	8.94328e+06	1.45119e+07	2.11843e+07	8.90854e+06	1.26546e+07	8.87536e+06	1.80809e+07	6.29052e+06	8.17409e+06	1.25936e+07	6.63375e+06	5.72616e+06	3.7135e+06	1.37158e+07	9.381e+06	1.37978e+07	9.76784e+06	1.08329e+07	1.12137e+07	1.12808e+07
22:5(4Z,7Z,10Z,13Z,16Z)	2.63	level2			331.261	298.4	POS	2.49984e+07	2.33994e+07	2.16833e+07	2.56752e+07	3.39554e+07	2.34838e+07	2.43492e+07	3.36037e+07	2.7169e+07	2.83081e+07	2.24746e+07	2.32718e+07	1.02482e+07	1.04357e+07	1.3049e+07	1.1073e+07	7.43993e+06	1.12594e+07	1.10374e+07	1.33754e+07	1.22233e+07	1.74956e+07	1.80391e+07	1.67764e+07	1.79592e+07	2.00251e+07	1.96934e+07	1.78314e+07
Dextromethorphan	2.63	level2			272.199	291.7	POS	9.71468e+06	1.09959e+07	9.09172e+06	8.65832e+06	1.44781e+07	8.64341e+06	2.41699e+07	4.84061e+07	2.09345e+07	3.09968e+07	2.4336e+07	1.67814e+07	2.42297e+07	3.27733e+07	2.61999e+07	2.69305e+07	2.08145e+07	2.9009e+07	1.09268e+07	1.35938e+07	1.13228e+07	2.71091e+07	1.95348e+07	2.17899e+07	2.04589e+07	2.02119e+07	2.06368e+07	1.82016e+07
Phytosphingosine 1-phosphate	2.63	level2			396.252	288.1	NEG	3.28199e+06	3.44713e+06	3.0695e+06	2.88209e+06	2.60007e+06	2.70884e+06	4.14995e+06	6.93738e+06	3.2402e+06	5.93111e+06	4.24704e+06	3.33741e+06	4.26816e+06	4.3363e+06	4.5232e+06	1.70185e+06	3.21335e+06	5.79822e+06	2.82126e+06	1.67101e+06	2.05748e+06	6.94502e+06	4.41007e+06	5.03477e+06	4.1177e+06	3.81416e+06	3.79254e+06	3.44732e+06
Olivetol	2.63	level2			181.121	273.8	POS	1.45602e+07	1.81327e+07	1.72862e+07	1.67434e+07	1.62658e+07	1.84356e+07	1.87715e+07	1.63806e+07	2.01469e+07	2.03817e+07	1.35448e+07	1.66384e+07	1.80533e+07	1.57619e+07	2.46809e+07	2.3275e+07	2.06176e+07	1.7194e+07	2.8727e+07	2.44299e+07	2.32979e+07	1.98836e+07	2.22592e+07	3.07845e+07	1.73414e+07	1.9778e+07	1.8758e+07	1.85077e+07
N-Cyclohexylcyclohexanecarboxamide	2.63	level2			210.184	261.3	POS	3.06484e+07	3.40774e+07	3.34102e+07	2.88985e+07	3.55025e+07	4.27996e+07	2.28852e+07	2.00321e+07	3.19665e+07	3.30315e+07	2.69796e+07	2.53883e+07	1.78265e+07	1.49982e+07	3.38121e+07	3.06018e+07	3.36761e+07	1.26991e+07	2.25386e+07	2.76715e+07	2.69266e+07	1.72812e+07	1.60443e+07	1.45065e+07	2.50193e+07	2.51325e+07	2.65916e+07	2.62801e+07
17.beta.-Methyl-epi-testosterone	2.63	level2			303.23	258.7	POS	1.50099e+08	1.91567e+08	1.84541e+08	1.79803e+08	1.52713e+08	1.4916e+08	1.34955e+08	1.58123e+08	1.30011e+08	1.66289e+08	1.61915e+08	1.45225e+08	1.40499e+08	1.31145e+08	1.51217e+08	1.30122e+08	1.08729e+08	1.31219e+08	1.03946e+08	1.19622e+08	9.05816e+07	1.26769e+08	1.65651e+08	1.49183e+08	1.577e+08	1.3865e+08	1.67086e+08	1.44548e+08
Gly-Pro-Arg-Pro-amide	2.63	level2			425.265	258	POS	8.57887e+06	6.89759e+06	1.03666e+07	4.8523e+06	8.74093e+06	5.90003e+06	9.65757e+06	1.04509e+07	1.37157e+07	1.37813e+07	1.20047e+07	1.06641e+07	2.84137e+06	3.02282e+06	2.86994e+06	2.7049e+06	2.96848e+06	3.97064e+06	1.26045e+06	3.81448e+06	4.37157e+06	3.7301e+06	3.92364e+06	2.75125e+06	4.03914e+06	8.24455e+06	6.24408e+06	5.12579e+06
Pyrinuron	2.63	level2			273.1	256.7	POS	2.85699e+07	3.03899e+07	2.48986e+07	2.96242e+07	1.55156e+07	2.85087e+07	2.48269e+07	3.44635e+07	3.29188e+07	3.96938e+07	2.72359e+07	2.48561e+07	1.40879e+07	1.08349e+07	5.35815e+06	3.85435e+06	8.64211e+06	1.5376e+07	8.31625e+06	4.81039e+06	5.0864e+06	1.48811e+07	1.10459e+07	1.3054e+07	1.89893e+07	1.97117e+07	1.92076e+07	1.83449e+07
5,7,9b-Trihydroxy-6,6,9a-trimethyl-3,5,5a,7,8,9-hexahydrobenzo[g][2]benzofuran-1-one	2.63	level2			283.155	256	POS	3.39138e+07	2.80965e+07	3.34252e+07	2.81507e+07	1.52298e+07	3.37494e+07	6.42511e+06	7.22494e+06	6.12835e+06	7.05404e+06	5.33057e+06	5.92322e+06	5.15328e+06	5.50228e+06	7.6588e+06	5.0031e+06	4.7922e+06	6.14651e+06	5.52059e+06	6.80477e+06	7.64407e+06	4.58299e+06	5.94821e+06	6.57752e+06	9.73077e+06	7.87766e+06	6.18217e+06	8.17415e+06
Hexadecanedioic acid, 3,3,14,14-tetramethyl-	2.63	level2			341.268	254.7	NEG	1.42628e+07	1.7705e+07	1.60628e+07	1.819e+07	1.34582e+07	1.61228e+07	2.40196e+07	2.31889e+07	1.71944e+07	1.83923e+07	1.85323e+07	1.75325e+07	1.57178e+07	1.24079e+07	1.48366e+07	1.34311e+07	1.26096e+07	1.22775e+07	1.38312e+07	1.22843e+07	1.42983e+07	1.54613e+07	1.38657e+07	1.26951e+07	1.45698e+07	1.55989e+07	1.43219e+07	1.47016e+07
2-Dec-9-enylpentanedioic acid	2.63	level2			269.175	242.8	NEG	2.17214e+07	2.22016e+07	2.3167e+07	2.20025e+07	2.29136e+07	2.45482e+07	2.64366e+07	2.99385e+07	2.97536e+07	2.72083e+07	2.53372e+07	2.72542e+07	2.54628e+07	2.47792e+07	2.37827e+07	2.0859e+07	2.09446e+07	2.09077e+07	2.29624e+07	1.98232e+07	1.84189e+07	2.89504e+07	2.5144e+07	2.74851e+07	2.40885e+07	2.32197e+07	2.37153e+07	2.40697e+07
p-(Isoamyloxy)aniline	2.63	level2			180.137	241.5	POS	1.67989e+07	1.82765e+07	1.58772e+07	1.6107e+07	1.45565e+07	1.63255e+07	1.86174e+07	1.79645e+07	2.75967e+07	2.50752e+07	2.25796e+07	1.96186e+07	2.01794e+07	2.28891e+07	1.94349e+07	1.926e+07	1.86822e+07	2.10685e+07	1.71312e+07	1.72232e+07	1.8841e+07	1.36663e+07	1.45049e+07	1.35996e+07	1.75172e+07	1.97824e+07	1.85801e+07	1.82095e+07
Cyanidin_3-(diferuloylsophoroside)_5-glucoside	2.63	level2			275.21	238.2	POS	1.06458e+10	8.71092e+09	8.48627e+09	7.45708e+09	2.06309e+10	1.25585e+10	6.90774e+09	8.29925e+09	1.29541e+10	1.30059e+10	1.43725e+10	7.36025e+09	6.74429e+09	1.09839e+10	1.00546e+10	1.4185e+10	9.22075e+09	5.51578e+09	8.85319e+09	9.05538e+09	1.28783e+10	9.25053e+09	8.45214e+09	5.61802e+09	9.9119e+09	1.01665e+10	9.74385e+09	1.02137e+10
Pelanserin	2.63	level2			363.18	228.6	NEG	4.65941e+06	1.14422e+06	2.41053e+06	2.84214e+06	4.87331e+06	2.5217e+06	4.77012e+06	4.17475e+06	1.80576e+06	2.56977e+06	1.96999e+06	4.23745e+06	1.42742e+07	1.47976e+07	1.65984e+07	1.38317e+07	7.84418e+06	1.04062e+07	1.3151e+07	7.82058e+06	4.16512e+06	7.44796e+06	8.92053e+06	1.84906e+07	7.55456e+06	6.52449e+06	6.25033e+06	7.15412e+06
6,6,8-Trimethyl-5,6-dihydro-[1,3]dioxolo[4,5-g]quinoline	2.63	level2			218.116	225.7	POS	4.32575e+07	3.28236e+07	3.211e+07	2.96551e+07	2.61744e+07	3.99901e+07	2.05032e+07	1.95967e+07	3.30064e+07	2.7467e+07	2.36701e+07	2.24917e+07	1.918e+07	2.14109e+07	1.88016e+07	1.74396e+07	1.66436e+07	1.93849e+07	2.09998e+07	2.42994e+07	2.88588e+07	1.31354e+07	1.45877e+07	1.27821e+07	2.32319e+07	2.31764e+07	2.32458e+07	2.40394e+07
Lynestrenol	2.63	level2			285.22	223.7	POS	1.3178e+08	8.54262e+07	1.48809e+08	1.42424e+08	1.14725e+08	9.02694e+07	8.50619e+07	8.57938e+07	1.25452e+08	1.2626e+08	6.95245e+07	1.32223e+08	1.09385e+08	1.1819e+08	1.23972e+08	1.19592e+08	9.51387e+07	1.09479e+08	6.40236e+07	7.70905e+07	1.07242e+08	1.01407e+08	1.10542e+08	8.81984e+07	7.43691e+07	1.26492e+08	7.63502e+07	1.27098e+08
Homononactinic acid	2.63	level2			215.128	223.6	NEG	1.68608e+08	1.8617e+08	1.66292e+08	1.76334e+08	1.7736e+08	2.06285e+08	1.36565e+08	1.26046e+08	1.75255e+08	1.50687e+08	1.19232e+08	1.2673e+08	1.11839e+08	1.05457e+08	1.45773e+08	1.39114e+08	1.35245e+08	1.04949e+08	1.91474e+08	2.06581e+08	2.54226e+08	1.22998e+08	1.35747e+08	1.15472e+08	1.52406e+08	1.56378e+08	1.51837e+08	1.57273e+08
2-Oct-7-enylpentanedioic acid	2.63	level2			241.144	219.8	NEG	2.82576e+07	3.72913e+07	3.63385e+07	2.95968e+07	3.70291e+07	2.88763e+07	4.37453e+07	4.66018e+07	5.33204e+07	3.69846e+07	3.88629e+07	4.26279e+07	3.44435e+07	3.41531e+07	2.95611e+07	2.60893e+07	2.19107e+07	2.7219e+07	2.20827e+07	1.90677e+07	1.59489e+07	2.20776e+07	2.369e+07	3.14989e+07	3.11759e+07	3.13996e+07	3.94157e+07	3.24901e+07
Mefenoxam	2.63	level2			280.152	219.6	POS	2.6889e+07	2.68358e+07	2.51233e+07	2.40231e+07	2.26239e+07	3.11045e+07	2.64471e+06	2.47578e+06	2.47156e+06	2.84411e+06	2.57632e+06	2.39764e+06	2.42572e+08	3.89662e+08	1.96183e+08	2.17406e+08	2.03567e+08	2.90442e+08	1.00911e+08	9.03638e+07	6.90084e+07	7.2503e+07	5.37595e+07	9.78592e+07	8.96732e+07	8.95903e+07	9.0667e+07	8.93664e+07
1,2-Dehydro-.alpha.-cyperone	2.63	level2			217.157	217	POS	1.96958e+07	1.58532e+07	1.70767e+07	2.20324e+07	2.48562e+07	1.55452e+07	2.16789e+07	2.13852e+07	2.61791e+07	2.49637e+07	2.37692e+07	2.30528e+07	1.82992e+07	1.80136e+07	2.05997e+07	1.9138e+07	1.81125e+07	1.38785e+07	1.83094e+07	1.81621e+07	1.84236e+07	1.58368e+07	1.71711e+07	2.14008e+07	1.90544e+07	2.20309e+07	5.04571e+06	2.25042e+07
2-Methyl-1-phenyl-2-propanyl_butyrate	2.63	level2			221.153	216.4	POS	9.65406e+07	1.04788e+08	9.31404e+07	1.02527e+08	1.39272e+08	1.01098e+08	8.89603e+07	1.16595e+08	1.06983e+08	8.76195e+07	9.30859e+07	8.5017e+07	8.18613e+07	9.97268e+07	1.09406e+08	9.50509e+07	8.08848e+07	9.56517e+07	5.57194e+07	6.01301e+07	4.96966e+07	5.76679e+07	5.78046e+07	7.11881e+07	8.48998e+07	8.66819e+07	9.07629e+07	8.43319e+07
9-Oxoprosta-10,12Z,14E-trienoic acid	2.63	level2			319.225	208.5	POS	1.59785e+08	8.01001e+07	7.62144e+07	8.47958e+07	6.19692e+07	6.29253e+07	2.07707e+08	1.77109e+08	2.23456e+08	2.12258e+08	1.94746e+08	2.49725e+08	1.86905e+08	1.84359e+08	2.16173e+08	1.74566e+08	1.50762e+08	1.79183e+08	1.45402e+08	4.74937e+07	1.17765e+08	1.45698e+08	1.51455e+08	2.37045e+08	1.49226e+08	1.89526e+08	1.97886e+08	1.92391e+08
2-Ethylhexyl dihydrogen phosphate	2.63	level2			209.094	205.8	NEG	6.22181e+06	6.97358e+06	6.68073e+06	6.36616e+06	5.5545e+06	5.31845e+06	5.83947e+06	6.60528e+06	6.69765e+06	5.70672e+06	6.16989e+06	5.49565e+06	5.40538e+06	6.33368e+06	6.11172e+06	5.96912e+06	6.05123e+06	5.62554e+06	6.99786e+06	5.92688e+06	5.58206e+06	6.26604e+06	6.06182e+06	5.61377e+06	5.78486e+06	5.77256e+06	6.17337e+06	6.58128e+06
(+)-Camphanic acid	2.63	level2			197.081	204	NEG	3.57418e+06	3.35845e+06	4.48238e+06	2.05417e+06	4.09391e+06	3.4214e+06	4.42092e+06	3.73233e+06	2.1167e+06	4.41338e+06	4.94009e+06	3.82504e+06	3.34496e+06	4.19896e+06	4.57799e+06	4.33077e+06	4.42741e+06	3.92969e+06	5.25878e+06	4.49109e+06	4.74737e+06	4.37651e+06	4.4153e+06	3.31311e+06	4.36127e+06	4.49206e+06	4.57522e+06	3.59455e+06
(S)-(-)-Pulegone	2.63	level2			153.126	203.5	POS	5.23536e+06	4.14038e+06	4.34843e+06	3.1588e+06	4.57635e+06	4.02673e+06	2.88486e+06	2.99547e+06	4.13836e+06	3.51912e+06	3.29303e+06	1.72509e+06	3.5192e+06	2.92244e+06	2.84008e+06	3.69946e+06	3.4547e+06	1.96876e+06	4.99304e+06	5.44196e+06	5.96977e+06	2.91942e+06	3.77012e+06	3.81175e+06	3.77104e+06	4.37303e+06	3.97229e+06	4.05355e+06
2-(4-Piperidin-4-ylcarbonyl)-1,2,3,4-tetrahydroisoquinoline	2.63	level2			245.164	202.5	POS	9.6488e+06	1.1919e+07	1.12479e+07	9.10326e+06	8.3055e+06	1.18512e+07	1.00791e+07	8.13676e+06	1.36755e+07	1.13559e+07	7.02202e+06	9.92346e+06	8.4894e+06	8.3228e+06	9.71512e+06	1.00704e+07	9.17869e+06	6.5539e+06	1.54284e+07	1.71643e+07	1.59071e+07	1.28518e+07	1.04198e+07	1.21131e+07	1.08969e+07	1.05327e+07	1.05992e+07	1.00211e+07
7-[(6-hydroxy-5,5,8a-trimethyl-2-methylidene-3,4,4a,6,7,8-hexahydro-1H-naphthalen-1-yl)methoxy]chromen-2-one	2.63	level2			405.206	192.9	POS	1.62488e+07	1.68982e+07	1.28204e+07	1.37565e+07	1.07648e+07	1.57579e+07	1.49781e+07	2.0396e+07	1.83864e+07	2.06233e+07	1.38761e+07	1.10606e+07	2.43397e+06	3.33278e+06	1.62097e+07	1.53935e+07	1.29847e+07	2.61404e+07	1.52487e+07	3.34555e+06	1.33646e+07	2.56275e+07	1.40235e+07	7.64647e+06	8.28128e+06	9.209e+06	8.35559e+06	9.14785e+06
2-Methylcinchoninamide	2.63	level2			187.085	189.3	POS	1.39186e+07	1.42184e+07	9.51304e+06	1.42246e+07	1.48785e+07	1.51725e+07	1.68526e+07	2.32382e+07	1.81356e+07	1.95005e+07	1.51929e+07	1.45156e+07	1.83833e+07	1.57605e+07	1.9252e+07	1.67977e+07	1.90053e+07	2.50261e+07	2.16203e+07	2.48967e+07	3.08842e+07	2.05454e+07	2.31138e+07	1.47602e+07	1.91492e+07	1.68155e+07	1.72093e+07	1.86628e+07
Anomalin A	2.63	level2			273.039	188.1	NEG	3.19703e+06	4.21438e+06	4.73082e+06	2.3051e+06	3.69146e+06	4.53892e+06	5.4484e+06	3.34432e+06	8.34582e+06	8.51774e+06	5.05805e+06	5.5998e+06	8.71789e+06	1.05563e+07	8.91153e+06	8.17388e+06	1.07126e+07	7.91643e+06	6.47422e+06	6.52003e+06	8.43259e+06	3.83446e+06	3.7805e+06	3.01617e+06	6.70476e+06	5.58475e+06	6.1039e+06	6.95975e+06
18-carboxy_dinor_Leukotriene_B4	2.63	level2			337.164	187.5	NEG	1.53233e+07	2.64242e+07	2.30392e+07	1.89524e+07	3.54171e+07	2.18647e+07	1.12182e+07	8.19475e+06	1.1853e+07	1.3084e+07	1.74733e+07	7.89953e+06	1.76099e+07	2.13577e+07	4.09794e+07	4.43102e+07	4.18231e+07	1.77053e+07	3.76283e+07	6.32954e+07	4.339e+07	2.96222e+07	2.15584e+07	2.27638e+07	2.54388e+07	2.54308e+07	2.47547e+07	2.58848e+07
(6E,8E)-3-Hydroxy-10-methoxy-4,9-dimethyl-10-oxodeca-6,8-dienoic acid	2.63	level2			255.123	184.9	NEG	2.1938e+06	4.27429e+06	2.21927e+06	3.66732e+06	4.26669e+06	2.60666e+06	4.19351e+06	636078	605476	1.6001e+06	1.96485e+06	3.68461e+06	8.63522e+06	2.39298e+07	2.39146e+07	1.53874e+07	1.34469e+07	1.75438e+07	1.14398e+07	1.06783e+07	1.09562e+07	7.37486e+06	8.3228e+06	1.10081e+07	6.26591e+06	7.64883e+06	5.7787e+06	6.67124e+06
Gabapentin	2.63	level2			172.132	182.7	POS	1.11002e+07	1.19458e+07	7.22423e+06	2.20988e+07	5.10988e+06	1.18715e+07	2.17e+07	2.70154e+07	2.43683e+07	3.333e+07	1.67299e+07	1.71548e+07	3.87111e+06	4.96176e+06	3.87533e+06	4.05606e+06	1.53483e+07	3.8892e+06	7.93355e+06	1.23047e+07	8.27596e+06	2.81988e+06	2.53198e+06	4.05628e+06	8.95819e+06	9.87331e+06	1.01433e+07	1.00542e+07
Loliolide	2.63	level2			197.116	181.6	POS	1.58468e+08	2.39906e+08	1.83349e+08	1.64794e+08	1.68486e+08	2.28045e+08	2.32856e+08	2.07713e+08	2.11321e+08	2.31884e+08	1.79002e+08	2.02231e+08	1.42926e+08	1.23779e+08	2.81728e+08	1.52833e+08	1.77532e+08	1.89759e+08	2.94131e+08	3.11124e+08	4.7126e+08	2.65653e+08	2.70987e+08	1.96132e+08	2.00991e+08	2.06926e+08	2.12841e+08	2.12545e+08
6.alpha.-Hydroxybudesonide	2.63	level2			447.239	177.7	POS	0	0	0	154864	195548	0	262144	999260	0	0	0	1.58654e+06	1.59355e+06	373051	1.16898e+06	2.08817e+06	2.55792e+06	1.0537e+06	2.09356e+06	1.39574e+06	484598	1.28549e+06	1.10814e+06	1.37293e+06	570185	542379	0	0
1,3-Cyclohexanedione, 4-(3-azidopropyl)-	2.63	level2			196.109	177.5	POS	1.42872e+06	1.68967e+06	1.23707e+06	1.21202e+06	2.5748e+06	1.87691e+06	4.43427e+06	1.7894e+07	2.58e+06	6.23557e+06	1.11538e+07	2.15933e+06	1.60678e+07	1.34534e+07	1.55945e+07	2.45055e+07	1.98579e+07	3.20007e+07	2.19144e+07	5.59842e+06	1.50662e+07	2.46471e+07	1.85243e+07	4.58541e+06	1.14951e+07	1.03622e+07	1.06865e+07	1.11287e+07
(1S,3R,4R,5R)-3-(((2E)-3-(2-(3,4-Dihydroxyphenyl)-7-hydroxy-3-(methoxycarbonyl)-2,3-dihydro-1-benzofuran-5-yl)prop-2-enoyl)oxy)-1,4,5-trihydroxycyclohexanecarboxylic acid	2.63	level2			545.129	170.9	NEG	6.80446e+06	4.93166e+06	5.66447e+06	5.30508e+06	4.28631e+06	3.99566e+06	6.39133e+06	6.02083e+06	9.23797e+06	8.59717e+06	9.23728e+06	6.69578e+06	767157	1.47131e+06	1.88403e+06	620532	2.87911e+06	2.03506e+06	1.95686e+06	1.89406e+06	2.03412e+06	2.11917e+06	3.04266e+06	3.12541e+06	4.26058e+06	4.1722e+06	4.13814e+06	4.91493e+06
Phenol, 2,6-difluoro-4-[4-[4-(4-methyl-1-piperazinyl)phenyl]-3-pyridinyl]-	2.63	level2			382.175	166.8	POS	6.15158e+07	3.32198e+07	2.76764e+07	2.5881e+07	3.4725e+07	4.44166e+07	4.71932e+07	1.50141e+08	4.22393e+07	6.50027e+07	5.09968e+07	2.68483e+07	8.68855e+07	1.33782e+08	1.00107e+08	7.81208e+07	1.3995e+08	1.66982e+08	5.73327e+07	5.34523e+07	6.41821e+07	1.13727e+08	9.28899e+07	4.85678e+07	6.48429e+07	7.01611e+07	6.78411e+07	6.78269e+07
Veratraldehyde, azine	2.63	level2			329.149	159.6	POS	6.03664e+06	4.96368e+06	2.8773e+06	4.24213e+06	6.40287e+06	5.35428e+06	5.63889e+06	8.55638e+06	5.74614e+06	6.06576e+06	6.04703e+06	3.33112e+06	7.15184e+06	1.05948e+07	5.87881e+06	8.90399e+06	7.91475e+06	9.84284e+06	4.47756e+06	2.71219e+06	0	8.94605e+06	7.37008e+06	5.2705e+06	6.36254e+06	6.13226e+06	6.11382e+06	6.21001e+06
Norharmane	2.63	level2			169.075	158.3	POS	6.4658e+07	5.7974e+07	6.93458e+07	5.77953e+07	6.09972e+07	6.89132e+07	5.37459e+07	6.46707e+07	7.56449e+07	7.66768e+07	5.63972e+07	5.55463e+07	3.73553e+07	4.45516e+07	3.23948e+07	2.09634e+07	2.83427e+07	3.85478e+07	4.09107e+07	4.33339e+07	3.54114e+07	2.94217e+07	3.64198e+07	4.06213e+07	4.78786e+07	4.93693e+07	5.22694e+07	5.23003e+07
(S)-N-Nitrosoanatabine	2.63	level2			190.096	156.9	POS	5.7099e+06	6.11233e+06	6.09104e+06	5.45317e+06	5.93616e+06	4.99582e+06	5.53145e+06	2.19688e+07	3.83817e+06	8.61386e+06	3.39946e+06	4.90627e+06	7.25847e+06	5.24376e+06	6.87468e+06	6.12598e+06	6.37777e+06	7.38222e+06	1.97524e+07	1.92561e+07	1.47607e+07	1.23805e+07	1.30164e+07	1.83208e+07	9.45631e+06	8.83786e+06	8.83668e+06	8.92895e+06
Pesticide3_Carbofuran_C12H15NO3_Furadan	2.63	level2			244.096	156.6	POS	7.05633e+06	8.78328e+06	8.68778e+06	6.87335e+06	6.23522e+06	6.8884e+06	1.41128e+07	1.73979e+07	1.63404e+07	1.42984e+07	1.58456e+07	1.44191e+07	9.62006e+06	9.55016e+06	7.38826e+06	4.81601e+06	8.73096e+06	1.01586e+07	9.64841e+06	5.92448e+06	5.34876e+06	1.48331e+07	1.43064e+07	1.66444e+07	1.07368e+07	1.0216e+07	1.10503e+07	1.05338e+07
4-(2,6-Diketo-1-propyl-3,7-dihydropurin-8-yl)besylic acid	2.63	level2			349.059	149.2	NEG	3.29674e+06	3.10125e+06	4.53661e+06	3.82722e+06	5.12079e+06	8.92838e+06	5.44188e+06	7.46402e+06	3.4491e+06	5.25215e+06	4.79078e+06	3.57926e+06	3.20543e+06	2.43962e+06	4.1136e+06	5.47364e+06	3.75491e+06	3.61733e+06	6.26028e+06	5.72223e+06	5.09058e+06	4.56424e+06	3.15036e+06	3.6478e+06	2.67414e+06	3.30073e+06	2.70594e+06	5.33844e+06
Ile-Pro	2.63	level2			229.153	51.6	POS	9.52997e+07	8.48438e+07	8.39475e+07	5.49533e+07	8.70136e+07	8.08985e+07	8.85849e+07	4.06685e+07	5.82188e+07	9.42545e+07	4.3217e+07	5.21071e+07	5.51599e+07	1.06983e+08	3.23495e+07	5.65214e+07	3.90033e+07	8.65155e+07	4.99369e+07	2.11136e+07	3.51813e+07	7.10622e+07	3.9575e+07	7.54326e+07	8.27653e+07	4.82634e+07	6.93387e+07	8.14035e+07
(3-Ethyl-2-imino-2,3-dihydro-1H-benzimidazol-1-yl)acetic acid	2.63	level2			220.107	37.8	POS	3.5837e+07	3.79145e+07	3.9829e+07	3.60185e+07	3.52048e+07	3.75404e+07	4.27245e+07	4.31436e+07	4.2023e+07	4.42943e+07	4.31923e+07	5.06873e+07	5.84714e+07	4.16524e+07	4.62161e+07	5.6776e+07	4.56e+07	7.99145e+07	4.72977e+07	4.81726e+07	5.14915e+07	6.14247e+07	3.28813e+07	4.87598e+07	1.69594e+07	4.75071e+07	5.00804e+07	4.40845e+07
2-Propylglutaric acid	2.63	level2			173.081	30.8	NEG	0	0	2.45485e+06	2.83044e+06	5.99204e+06	1.41309e+06	6.23326e+06	8.48262e+06	8.41939e+06	1.05054e+07	7.63e+06	6.96777e+06	3.38984e+06	4.5873e+06	2.75823e+06	5.91335e+06	3.63622e+06	1.4094e+06	0	0	0	0	0	1.53568e+06	1.25105e+06	2.54434e+06	3.86742e+06	3.68665e+06
4-Amino-2-oxo-1,2-dihydropyrimidine-5-carboxylic acid	2.63	level2			156.041	23.6	POS	1.43958e+07	7.92981e+06	2.79149e+07	1.11819e+07	2.53408e+07	1.6838e+07	3.30483e+07	2.20423e+07	3.35165e+07	3.37426e+07	2.94759e+07	3.92494e+07	3.07478e+07	2.74666e+07	4.2678e+07	4.13888e+07	3.68558e+07	3.11383e+07	6.2415e+07	7.88311e+07	5.89275e+07	4.46873e+07	5.31742e+07	4.4969e+07	3.29217e+07	3.73696e+07	3.08998e+07	3.57453e+07
Dibutyl phthalate	2.63	level2			279.157	322.7	POS	3.2185e+07	3.08332e+07	7.11237e+07	3.17358e+07	7.01792e+07	3.21898e+07	7.29089e+07	3.40323e+07	8.5281e+07	3.60708e+07	3.47128e+07	3.48222e+07	3.17344e+07	3.99531e+07	5.90765e+07	6.47284e+07	6.64219e+07	2.86712e+07	6.60524e+07	3.22059e+07	6.68612e+07	3.32458e+07	3.21313e+07	6.76409e+07	2.94518e+07	3.21002e+07	3.56643e+07	3.23051e+07
Sph(d18:2)	2.63	level2			298.272	252.1	POS	6.02843e+07	6.31134e+07	9.05371e+07	5.3237e+07	7.57642e+07	6.72319e+07	8.08542e+07	8.17165e+07	9.22807e+07	1.04522e+08	8.52436e+07	8.09213e+07	1.33219e+08	1.48638e+08	1.45701e+08	1.07676e+08	1.05202e+08	1.51057e+08	1.13435e+08	9.33377e+07	7.98505e+07	1.70631e+08	1.46936e+08	1.37004e+08	1.02976e+08	1.01813e+08	1.01123e+08	1.03675e+08
Decatrienedioylcarnitine	2.63	level2			340.175	159.5	POS	6.18672e+06	4.98022e+06	4.61917e+06	3.25436e+06	4.47904e+06	4.90023e+06	4.38379e+06	7.07434e+06	7.5794e+06	5.17842e+06	5.64251e+06	4.81949e+06	7.24922e+06	1.26439e+07	7.61318e+06	6.27783e+06	6.16716e+06	1.24187e+07	2.57582e+06	1.6507e+06	2.16991e+06	7.03305e+06	5.78448e+06	5.25824e+06	5.2782e+06	5.42329e+06	5.47571e+06	5.32785e+06
2-Methylbutylamine	2.62	level2			88.1116	356.4	POS	4.26462e+09	4.2044e+09	4.59813e+09	4.02269e+09	4.78141e+09	4.63667e+09	4.7742e+09	4.21546e+09	4.59244e+09	4.68134e+09	4.07088e+09	4.63583e+09	3.95111e+09	4.14319e+09	4.09406e+09	4.56964e+09	4.80653e+09	4.23803e+09	4.29482e+09	4.81544e+09	4.81468e+09	4.86293e+09	4.90773e+09	4.61493e+09	3.98741e+09	4.22267e+09	4.40048e+09	4.27857e+09
N-Hexadecanoylpyrrolidine	2.62	level2			310.308	322.6	POS	441454	711754	361305	589017	1.31749e+06	350749	717975	165223	595546	472146	568363	323664	570333	1.12603e+06	143846	418067	900201	704257	467204	331703	1.05141e+06	467694	427669	246957	1.34027e+06	407603	934210	1.00931e+06
Triptophenolide	2.62	level2			311.168	295.5	NEG	3.37637e+08	2.08187e+08	1.14988e+08	7.28376e+07	1.2255e+08	1.02204e+08	2.22692e+08	1.77508e+08	1.75138e+08	1.3137e+08	2.15862e+08	1.57784e+08	1.32163e+08	9.67022e+07	1.15193e+08	1.09799e+08	1.47177e+08	7.06408e+07	9.43464e+07	6.99731e+07	9.97427e+07	1.12852e+08	6.61034e+07	1.10827e+08	2.15105e+08	2.11095e+08	2.06986e+08	2.08108e+08
delta-Tocotrienol	2.62	level2			397.307	291.7	POS	1.27221e+07	1.75389e+07	1.36298e+07	1.91097e+07	1.23765e+07	9.14872e+06	1.15641e+07	6.46171e+06	1.25218e+07	1.11888e+07	9.6869e+06	8.31397e+06	2.22651e+07	2.37389e+07	2.13704e+07	2.31843e+07	1.94173e+07	2.36133e+07	2.10666e+07	2.25201e+07	2.34586e+07	1.02177e+07	1.12334e+07	1.44975e+07	1.48959e+07	2.73194e+07	1.69981e+07	1.61978e+07
(ent-15beta)-15,19-Dihydroxy-7-trachylobanone	2.62	level2			319.225	279	POS	1.32485e+08	1.48516e+08	1.48709e+08	1.55868e+08	1.60637e+08	1.40613e+08	1.59258e+08	1.89698e+08	1.58479e+08	1.50962e+08	1.73753e+08	1.59758e+08	1.50448e+08	1.59303e+08	1.80769e+08	1.42442e+08	1.21858e+08	1.66025e+08	1.09826e+08	1.20472e+08	9.1394e+07	1.36246e+08	1.29345e+08	1.61847e+08	1.39577e+08	1.49146e+08	1.44097e+08	1.41895e+08
Cycloviolaxanthin	2.62	level2			601.421	273.8	POS	2.18563e+07	2.14103e+07	2.29198e+07	2.22672e+07	2.01213e+07	2.54942e+07	2.53527e+07	2.74823e+07	2.01322e+07	2.52582e+07	1.8812e+07	1.80708e+07	1.97126e+07	1.67234e+07	2.28207e+07	5.79389e+06	1.37057e+07	2.01677e+07	1.20034e+07	6.88636e+06	7.48141e+06	3.08755e+07	2.08535e+07	2.9702e+07	2.26665e+07	2.14706e+07	2.14665e+07	2.13242e+07
Sclareolide	2.62	level2			251.199	272.6	POS	8.67679e+06	8.56312e+06	8.53359e+06	8.17464e+06	7.57639e+06	9.5565e+06	1.24202e+07	1.32845e+07	1.09242e+07	1.19686e+07	1.12734e+07	1.13133e+07	1.24642e+07	1.20978e+07	1.56663e+07	1.20277e+07	1.0391e+07	1.33481e+07	1.05051e+07	1.07221e+07	9.31897e+06	1.04798e+07	1.04436e+07	1.3116e+07	1.14619e+07	1.04534e+07	1.17124e+07	1.18903e+07
Alantolactone	2.62	level2			233.152	267.3	POS	1.16124e+07	1.34085e+07	1.48861e+07	1.9133e+07	3.14476e+07	1.18975e+07	1.67054e+07	1.0301e+07	1.16955e+07	1.0195e+07	8.24874e+06	9.51755e+06	6.97147e+06	5.76701e+06	7.29197e+06	6.41594e+06	7.09223e+06	6.8738e+06	7.6558e+06	7.48563e+06	7.90986e+06	9.44155e+06	7.49481e+06	1.3106e+07	9.8721e+06	9.967e+06	9.47638e+06	1.01965e+07
(E)-5-((1S,4R)-3,3-Dimethylbicyclo[2.2.1]heptan-2-yl)pent-3-en-2-one	2.62	level2			207.173	265.3	POS	1.2514e+07	1.49284e+07	1.74896e+07	1.47454e+07	2.08523e+07	1.49457e+07	2.57116e+07	3.60721e+07	2.7963e+07	3.48902e+07	3.05523e+07	2.55237e+07	1.76556e+07	1.75503e+07	2.44065e+07	1.88161e+07	1.66116e+07	1.99026e+07	2.25602e+07	4.22229e+07	3.43693e+07	2.69158e+07	3.52487e+07	2.6654e+07	2.1481e+07	2.23921e+07	2.31976e+07	2.40155e+07
Tyromycic_acid	2.62	level2			453.333	258.7	POS	1.12773e+06	1.7224e+06	1.93735e+06	1.2617e+06	2.27479e+06	1.46382e+06	1.71294e+06	1.44968e+06	1.70496e+06	1.13005e+06	1.82033e+06	1.71815e+06	1.36983e+06	2.91523e+06	1.90561e+06	2.02673e+06	1.82347e+06	949388	1.18163e+06	1.6383e+06	1.41777e+06	1.67737e+06	919981	1.76281e+06	1.5053e+06	1.76356e+06	1.52755e+06	1.80575e+06
Grandiflorenic acid	2.62	level2			301.215	256.7	POS	1.82525e+08	1.94258e+08	1.91874e+08	2.00128e+08	2.07754e+08	6.36708e+07	5.85855e+07	6.27348e+07	1.78447e+08	5.56573e+07	9.69023e+07	5.79222e+07	3.51321e+07	7.14992e+07	6.23943e+07	2.68324e+07	4.56387e+07	5.79332e+07	4.18777e+07	5.54301e+07	4.16051e+07	8.85917e+07	7.20909e+07	4.34602e+07	5.70276e+07	6.39185e+07	6.54467e+07	1.7207e+08
4-Acetyl-6-tert-butyl-1,1-dimethylindane	2.62	level2			245.188	252	POS	3.22275e+07	3.67837e+07	2.94316e+07	3.07041e+07	3.73119e+07	4.12545e+07	3.39687e+07	3.69476e+07	7.53347e+07	3.39613e+07	5.48252e+07	3.26574e+07	2.79474e+07	6.21967e+07	4.06511e+07	3.14546e+07	5.09103e+07	3.20517e+07	2.99604e+07	3.29625e+07	5.25049e+07	2.47413e+07	5.61242e+07	6.72288e+07	3.11186e+07	3.14558e+07	3.1561e+07	3.41124e+07
15(R)-15-Methylprostaglandin F2.alpha.	2.62	level2			367.247	235.5	NEG	5.15143e+07	4.28456e+07	4.15458e+07	5.48972e+07	6.26621e+07	6.81857e+07	7.19998e+07	8.01001e+07	5.42863e+07	5.69946e+07	4.18145e+07	4.63783e+07	3.25169e+07	2.39566e+07	3.21445e+07	3.57056e+07	2.62639e+07	2.40584e+07	2.2308e+07	2.71554e+07	2.26641e+07	2.28268e+07	2.38624e+07	3.70505e+07	3.6714e+07	4.88484e+07	4.82733e+07	4.51887e+07
(R)-11,12,13-Trinor-1(5),6,9-guaiatrien-8-one	2.62	level2			175.111	230.2	POS	1.58457e+07	1.81259e+07	2.13666e+07	2.51206e+07	3.55232e+07	1.89784e+07	3.23256e+07	4.09107e+07	3.53286e+07	2.94202e+07	2.75317e+07	2.58179e+07	2.25373e+07	2.54203e+07	2.97726e+07	2.75639e+07	2.13379e+07	2.78176e+07	2.23035e+07	2.55614e+07	2.63956e+07	1.92541e+07	1.94454e+07	2.52126e+07	2.29835e+07	1.77003e+07	1.2573e+07	2.01165e+07
1-Cyclohexyl-2-(5H-imidaz[5,1-a]isoindol-5-yl)ethanol	2.62	level2			283.18	221.7	POS	1.96469e+07	1.79255e+07	1.31098e+07	1.25627e+07	1.10537e+07	1.8758e+07	1.11002e+07	2.18591e+07	1.30196e+07	1.53045e+07	1.21032e+07	9.48071e+06	3.45469e+07	4.83469e+07	2.25495e+07	3.11426e+07	3.16012e+07	2.93543e+07	1.35403e+07	1.13976e+07	1.6441e+07	1.44855e+07	1.31745e+07	8.21374e+06	1.83168e+07	1.83369e+07	1.86069e+07	1.9216e+07
13,14-dihydro_PGF2alpha	2.62	level2			357.263	215.1	POS	1.06118e+07	1.26622e+07	9.64656e+06	1.22399e+07	1.39603e+07	9.7067e+06	1.07792e+07	7.47962e+06	1.03979e+07	2.20892e+07	1.2656e+07	9.32422e+06	1.74336e+07	1.42648e+07	1.20183e+07	1.74847e+07	1.40355e+07	9.66739e+06	2.02261e+07	1.56855e+07	1.72851e+07	1.32122e+07	1.46534e+07	1.27222e+07	1.22969e+07	1.59747e+07	1.69562e+07	1.67723e+07
Cafestol	2.62	level2			317.21	212.7	POS	4.97615e+07	5.74987e+07	6.01537e+07	5.73921e+07	1.93696e+08	5.54113e+07	5.97228e+07	7.68789e+07	5.55316e+07	5.3347e+07	6.63156e+07	5.37416e+07	5.0715e+07	5.15938e+07	8.73348e+07	5.96743e+07	4.58427e+07	4.97877e+07	3.82896e+07	4.07809e+07	4.45207e+07	3.46248e+07	3.53472e+07	5.11297e+07	5.04337e+07	4.9943e+07	5.17884e+07	5.00844e+07
Dinor-12-oxophytodienoic acid	2.62	level2			265.178	209.8	POS	1.53021e+07	2.84532e+07	2.53117e+07	1.55245e+07	2.58137e+07	3.52613e+07	3.01525e+07	3.0911e+07	2.43844e+07	3.96075e+07	2.66554e+07	3.02615e+07	3.26099e+07	3.59586e+07	3.71473e+07	3.2553e+07	3.29968e+07	3.26624e+07	3.37815e+07	2.96479e+07	2.7961e+07	2.88659e+07	2.71472e+07	3.22001e+07	1.74357e+07	3.14922e+07	1.70647e+07	3.09585e+07
Pisiferal	2.62	level2			301.215	207.2	POS	6.58494e+07	4.85062e+07	5.45887e+07	7.08337e+07	7.94418e+07	6.73817e+07	6.3439e+07	6.1461e+07	5.93525e+07	5.55086e+07	5.17413e+07	5.98948e+07	5.72953e+07	6.03755e+07	6.22778e+07	6.32598e+07	5.22356e+07	9.41059e+07	5.29089e+07	5.41053e+07	4.56349e+07	4.60044e+07	5.36066e+07	6.4388e+07	5.81709e+07	9.3906e+07	4.98588e+07	6.80535e+07
4,4,7a-Trimethyl-3a,5,6,7-tetrahydro-3H-indene-1-carboxylic acid	2.62	level2			209.152	202.6	POS	2.77023e+08	3.09324e+08	2.89381e+08	2.84501e+08	3.12976e+08	3.10756e+08	2.76663e+08	1.97896e+08	3.05636e+08	2.73678e+08	2.92482e+08	2.71046e+08	2.93585e+08	2.83785e+08	3.8594e+08	3.64249e+08	3.4054e+08	2.44837e+08	3.47267e+08	3.7471e+08	3.59452e+08	2.75796e+08	2.53453e+08	3.10104e+08	2.90845e+08	2.9245e+08	2.95679e+08	3.00593e+08
4,5.alpha.-Dihydronorethisterone	2.62	level2			301.215	194.6	POS	2.49849e+07	2.83893e+07	3.25451e+07	2.70313e+07	3.02482e+07	2.86509e+07	2.60662e+07	2.50246e+07	3.05513e+07	3.06524e+07	1.98851e+07	2.98828e+07	2.23302e+07	2.1862e+07	2.84909e+07	2.14186e+07	2.22736e+07	7.90323e+06	2.09569e+07	2.21356e+07	1.90672e+07	1.862e+07	1.97109e+07	2.59049e+07	2.36332e+07	2.43798e+07	2.25248e+07	2.35884e+07
(R)-8-Acetoxycarvotanacetone	2.62	level2			211.131	190.6	POS	1.2809e+07	1.89257e+07	1.9909e+07	1.93696e+07	1.60251e+07	1.47166e+07	1.16914e+07	1.14565e+07	1.48652e+07	1.32286e+07	1.16918e+07	1.32516e+07	1.52207e+07	2.32271e+07	1.39986e+07	1.16186e+07	1.05763e+07	1.62642e+07	1.08642e+07	1.06685e+07	1.12114e+07	1.1881e+07	1.18953e+07	1.08826e+07	1.27792e+07	1.75535e+07	1.93352e+07	1.18226e+07
Humilixanthin	2.62	level2			327.119	190.6	POS	1.115e+07	9.7156e+06	1.11321e+07	1.11337e+07	9.79121e+06	1.17305e+07	1.14663e+07	1.06608e+07	1.36977e+07	1.1998e+07	1.04641e+07	1.09216e+07	1.20187e+07	1.44232e+07	1.16156e+07	1.13082e+07	1.1057e+07	1.20627e+07	1.1269e+07	9.32556e+06	1.14923e+07	1.20357e+07	1.18839e+07	1.17286e+07	1.15733e+07	1.12385e+07	1.09588e+07	1.09964e+07
Flumazenil	2.62	level2			304.107	186.9	POS	3.07588e+06	3.25143e+06	3.13369e+06	1.91061e+06	2.56509e+06	3.34522e+06	4.2235e+06	4.84091e+06	6.21595e+06	6.33217e+06	4.41718e+06	5.20122e+06	3.79e+06	3.82596e+06	3.82223e+06	2.59693e+06	2.18793e+06	2.16044e+06	7.05262e+06	7.71026e+06	8.02445e+06	2.97692e+06	4.06604e+06	3.43886e+06	4.03519e+06	4.30893e+06	4.04415e+06	4.11125e+06
Gossypol	2.62	level2			517.191	186.7	NEG	2.79049e+07	3.03576e+07	2.14694e+07	2.47876e+07	2.74006e+07	2.62688e+07	2.7497e+07	3.25798e+07	2.53486e+07	2.41118e+07	4.41399e+07	2.45174e+07	1.97989e+07	1.8206e+07	3.64324e+07	2.41802e+07	2.06674e+07	1.50941e+07	1.59367e+07	1.47985e+07	1.92262e+07	2.27492e+07	1.99087e+07	1.82759e+07	2.21051e+07	2.09168e+07	2.27352e+07	2.23795e+07
2-(3,4-Dihydroxyphenyl)-5,7-dihydroxy-4-oxo-4H-chromen-3-yl 6-deoxy-4-O-.beta.-D-glucopyranosyl-.alpha.-L-mannopyranoside	2.62	level2			609.144	180.5	NEG	7.60988e+07	9.03834e+07	6.51097e+07	7.90895e+07	1.00968e+08	7.97865e+07	1.29258e+08	1.13811e+08	7.28995e+07	1.31241e+08	1.74861e+08	9.57416e+07	7.40528e+07	9.08042e+07	1.51295e+08	2.58719e+08	1.81299e+08	8.74589e+07	9.56881e+07	1.04233e+08	1.71547e+08	8.3986e+07	7.00175e+07	8.68341e+07	1.09831e+08	1.13707e+08	1.13324e+08	1.08545e+08
Citreoviridinol_A1	2.62	level2			421.186	179.4	POS	1.61525e+06	962367	2.1424e+06	2.00637e+06	1.45692e+06	913636	2.90423e+06	6.78303e+06	1.92602e+06	2.98505e+06	2.90416e+06	1.20334e+07	9.8438e+06	1.03969e+07	7.46567e+06	8.54467e+06	1.02398e+07	1.11303e+07	2.12689e+06	3.34699e+06	4.35047e+06	1.40866e+07	9.62008e+06	5.63019e+06	4.9713e+06	4.59565e+06	5.09324e+06	4.10368e+06
PyroGlu-Trp	2.62	level2			316.127	167.5	POS	1.33369e+07	1.33e+07	1.08645e+07	1.35316e+07	1.08584e+07	1.23073e+07	1.33005e+07	1.52985e+07	1.2773e+07	1.27905e+07	1.09081e+07	1.15872e+07	8.30487e+06	7.84356e+06	8.20801e+06	6.33375e+06	9.04105e+06	1.17875e+07	9.70942e+06	5.53903e+06	8.0247e+06	1.45275e+07	1.45192e+07	1.60289e+07	1.08262e+07	1.12302e+07	1.15048e+07	1.10966e+07
4-Amino-8-(trifluoromethyl)quinoline	2.62	level2			213.065	167.3	POS	1.00836e+08	1.07126e+08	2.06355e+08	9.19817e+07	8.67e+07	1.01334e+08	1.56841e+08	1.83802e+08	2.55895e+08	2.44421e+08	2.00841e+08	1.84528e+08	1.09208e+08	8.72334e+07	7.60305e+07	6.63405e+07	8.97463e+07	4.17629e+07	3.97581e+07	3.5001e+07	3.56325e+07	3.61963e+07	3.59486e+07	4.16746e+07	6.72928e+07	1.3161e+08	1.50917e+08	1.37436e+08
(Desmethyl)hydroxycerivastatin	2.62	level2			462.232	161.9	POS	1.77667e+07	1.33758e+07	1.29692e+07	1.05348e+07	1.57008e+07	1.64836e+07	3.09098e+07	1.08635e+07	3.90403e+07	3.42301e+07	1.61179e+07	2.74743e+07	2.9834e+07	2.4327e+07	2.02536e+07	8.50077e+06	1.52912e+07	1.40949e+07	1.52523e+07	1.74432e+07	1.65407e+07	8.95101e+06	1.3653e+07	2.42177e+07	1.63864e+07	2.69925e+07	1.75124e+07	2.7599e+07
3-(Benzoyloxy)-2-hydroxypropyl .beta.-D-glucopyranosiduronic acid	2.62	level2			371.096	160.3	NEG	2.1246e+07	2.47794e+07	1.72591e+07	1.85725e+07	2.91654e+07	3.56897e+07	1.01058e+07	1.14758e+07	7.61086e+06	1.01589e+07	6.77409e+06	5.20593e+06	9.76502e+06	8.44689e+06	1.54751e+07	2.28221e+07	2.30756e+07	1.32155e+07	3.23421e+07	3.34878e+07	4.67693e+07	1.69946e+07	2.0489e+07	1.808e+07	1.87277e+07	2.224e+07	1.81408e+07	1.90252e+07
(-)-Epigallocatechin	2.62	level2			305.068	159.3	NEG	2.1571e+07	1.97842e+07	1.48832e+07	2.53157e+07	1.42035e+07	2.02853e+07	1.61594e+07	2.31026e+07	1.86224e+07	2.52472e+07	1.3139e+07	1.21495e+07	7.40646e+06	7.72217e+06	1.17084e+07	5.86199e+06	8.30651e+06	7.46772e+06	7.58967e+06	6.54164e+06	6.63826e+06	1.3344e+07	1.26677e+07	8.69964e+06	1.34186e+07	1.52964e+07	1.38303e+07	1.32025e+07
3'-Benzyloxy-5,6,7,4'-tetramethoxyflavone	2.62	level2			449.159	153.7	POS	7.66248e+06	5.38895e+06	3.47272e+06	3.3769e+06	6.29275e+06	6.44927e+06	8.70597e+06	2.02145e+07	6.89255e+06	1.16779e+07	1.16091e+07	5.4468e+06	2.35802e+07	1.92563e+07	1.22847e+07	2.03738e+07	2.18481e+07	2.54105e+07	1.73698e+07	6.11183e+06	1.18494e+07	1.68421e+07	1.22904e+07	4.87905e+06	1.2166e+07	1.16128e+07	1.28195e+07	1.29476e+07
Pimozide	2.62	level2			460.217	41.9	NEG	3.87739e+06	4.31869e+06	4.47297e+06	3.4711e+06	3.28228e+06	3.89422e+06	3.57083e+06	3.15079e+06	4.45821e+06	3.11997e+06	4.07877e+06	3.5224e+06	3.52804e+06	3.71153e+06	3.21127e+06	3.75678e+06	3.94731e+06	2.98405e+06	2.85337e+06	2.41e+06	2.47839e+06	2.54331e+06	2.37416e+06	2.80849e+06	3.18328e+06	3.28533e+06	3.24511e+06	3.60069e+06
(Cyanomethyl)(triphenyl)phosphonium cation	2.62	level2			302.112	41.4	POS	2.09286e+07	1.59985e+07	1.47697e+07	1.64259e+07	8.90462e+06	1.10943e+07	1.01417e+07	8.07709e+06	7.13012e+06	9.03582e+06	1.02083e+07	1.17815e+07	9.41093e+06	9.17031e+06	8.04284e+06	6.46106e+06	9.64973e+06	7.28891e+06	8.86824e+06	9.0223e+06	5.84694e+06	9.70319e+06	9.78155e+06	1.44423e+07	7.20402e+06	1.01335e+07	9.42909e+06	1.10716e+07
4-(4-Methylpiperazino)benzoic acid	2.62	level2			221.127	32.5	POS	4.47147e+08	9.09993e+08	4.57346e+08	9.16587e+08	4.81035e+08	4.04312e+08	4.1869e+08	4.15563e+08	9.06047e+08	1.10971e+09	4.31223e+08	3.7995e+08	5.68463e+08	5.30841e+08	7.76429e+08	6.29493e+08	7.0773e+08	1.74354e+09	7.05234e+08	7.55232e+08	7.92187e+08	6.06896e+08	6.10516e+08	5.5009e+08	5.58192e+08	1.33152e+09	6.14823e+08	1.32422e+09
Stigmastadienone	2.61	level2			411.359	334.5	POS	1.87293e+06	1.73265e+06	3.02236e+06	2.75419e+06	2.75071e+06	6.19566e+06	3.51903e+06	1.54174e+06	600404	2.82969e+06	3.76477e+06	2.50268e+06	2.59201e+06	571894	1.72687e+06	2.74217e+06	2.4375e+06	5.79688e+06	2.4891e+06	2.39389e+06	2.61756e+06	3.9638e+06	4.28215e+06	6.129e+06	2.86122e+06	5.07222e+06	1.75915e+06	4.16628e+06
1,2-Epoxy-1,2,7,7',8,8',11',12'-octahydro-psi,psi-carotene	2.61	level2			561.5	322.1	POS	1.16278e+07	1.18628e+07	9.52634e+06	7.70793e+06	1.26219e+07	1.22613e+07	1.32644e+07	7.76298e+06	2.07345e+06	1.00669e+07	1.14957e+07	1.33766e+07	8.92228e+06	4.88228e+06	7.64149e+06	8.54099e+06	9.1306e+06	5.5192e+06	1.2495e+07	3.12135e+07	9.70395e+06	1.12935e+07	1.40762e+07	9.13063e+06	9.02247e+06	9.18876e+06	1.12839e+07	8.45371e+06
1-Palmitoyl-2-hydroxy-sn-glycero-3-phospho-(1'-rac-glycerol)	2.61	level2			483.27	309.4	NEG	1.45934e+06	1.9413e+06	1.38477e+06	1.81351e+06	1.46091e+06	1.52844e+06	3.85147e+06	3.1836e+06	1.60682e+06	2.37604e+06	2.32271e+06	3.11164e+06	1.49994e+06	945386	2.34292e+06	2.19952e+06	1.56658e+06	1.22072e+06	1.70409e+06	2.08852e+06	1.17439e+06	3.04086e+06	2.90777e+06	2.54887e+06	1.70926e+06	1.81368e+06	1.48192e+06	1.92248e+06
16,19,22,25,28,31-Tetratriacontahexaenoic acid, (all-Z)-	2.61	level2			497.433	302.3	POS	5.423e+06	5.30553e+06	4.49567e+06	4.81442e+06	3.34819e+06	5.45445e+06	2.27135e+06	1.64921e+06	2.99836e+06	3.16553e+06	2.18564e+06	1.56049e+06	8.81548e+06	1.05095e+07	3.70521e+06	6.2511e+06	4.84759e+06	9.26263e+06	5.80632e+06	4.44376e+06	4.14405e+06	6.70158e+06	3.70323e+06	7.46195e+06	4.51559e+06	4.37732e+06	4.58932e+06	5.11985e+06
N-(.alpha.-Linolenoyl)tyrosine	2.61	level2			440.279	291.6	NEG	3.33199e+06	3.24251e+06	4.05981e+06	3.16916e+06	3.21156e+06	3.63435e+06	4.0983e+06	6.27616e+06	3.99188e+06	5.75664e+06	5.76214e+06	5.16071e+06	5.55841e+06	5.52332e+06	5.96455e+06	3.58604e+06	4.32952e+06	7.30596e+06	6.30332e+06	4.97818e+06	5.52382e+06	1.16667e+07	8.75011e+06	7.40974e+06	5.54932e+06	5.08917e+06	5.23228e+06	4.78112e+06
Glycohyodeoxycholic acid	2.61	level2			450.318	284.5	POS	1.62843e+07	1.63509e+07	1.66676e+07	1.44588e+07	1.02885e+07	1.42787e+07	2.88742e+07	3.80086e+07	3.35982e+07	3.23167e+07	2.46582e+07	2.18883e+07	1.99534e+07	1.75452e+07	9.94703e+06	5.19024e+06	9.16401e+06	1.79978e+07	8.4047e+06	5.25876e+06	8.35499e+06	2.1554e+07	1.64289e+07	1.62439e+07	1.57358e+07	1.73067e+07	1.91506e+07	1.60999e+07
Bicyclo-prostaglandin E1	2.61	level2			335.221	275.1	NEG	2.0138e+08	2.04559e+08	2.12445e+08	2.09095e+08	3.00045e+08	2.0994e+08	2.22877e+08	3.01259e+08	2.5985e+08	2.60979e+08	2.25008e+08	2.3649e+08	1.46478e+08	1.54624e+08	1.93841e+08	1.61825e+08	1.31678e+08	1.59855e+08	1.82775e+08	1.64532e+08	1.27514e+08	1.49669e+08	1.67336e+08	2.12865e+08	1.9192e+08	1.94216e+08	1.86238e+08	1.89194e+08
(E)-5-[(1S,8aS)-5,5,8a-Trimethyl-2-methylidene-3,4,4a,6,7,8-hexahydro-1H-naphthalen-1-yl]-3-(hydroxymethyl)-2-oxopent-3-enoic acid	2.61	level2			333.206	272.4	NEG	4.56271e+06	4.61168e+06	3.75249e+06	3.6636e+06	4.05511e+06	4.1328e+06	4.19146e+06	5.31935e+06	9.32262e+06	4.58814e+06	3.8757e+06	1.256e+07	5.84638e+06	6.20183e+06	5.02969e+06	5.50706e+06	3.48848e+06	5.34517e+06	8.13123e+06	5.65301e+06	5.65532e+06	4.02558e+06	4.49786e+06	4.4908e+06	4.21197e+06	4.35904e+06	3.90084e+06	5.55032e+06
Aureonitol	2.61	level2			207.137	260	POS	4.19303e+06	3.9574e+06	4.02479e+06	2.61386e+06	3.14279e+06	3.82112e+06	4.66314e+06	5.84193e+06	4.17584e+06	5.08526e+06	4.69873e+06	3.15207e+06	7.9179e+06	7.12026e+06	1.05593e+07	7.98192e+06	8.05289e+06	1.05749e+07	1.00715e+07	8.73299e+06	8.52022e+06	9.64081e+06	7.93381e+06	7.78133e+06	6.76367e+06	6.86143e+06	6.24657e+06	6.65342e+06
10-Shogaol	2.61	level2			333.241	235.6	POS	2.31906e+07	2.531e+07	1.74391e+07	1.80295e+07	2.58898e+07	2.3141e+07	2.21983e+07	2.58484e+07	2.12418e+07	1.71665e+07	2.00312e+07	1.76965e+07	3.53641e+07	4.86287e+07	3.85892e+07	3.87597e+07	3.32028e+07	3.93554e+07	2.80537e+07	2.69465e+07	2.4207e+07	3.51287e+07	2.80862e+07	2.02786e+07	2.51473e+07	2.67079e+07	2.49444e+07	2.42615e+07
(9Z,11E,13E,15Z)-4-Oxo-9,11,13,15-octadecatetraenoic_acid	2.61	level2			291.194	233.6	POS	1.07422e+08	1.32797e+08	1.23271e+08	1.84398e+08	1.02339e+08	1.20573e+08	7.80682e+07	6.81687e+07	1.02719e+08	8.70024e+07	9.96148e+07	8.48466e+07	7.79183e+07	7.08066e+07	7.08279e+07	8.26421e+07	8.85297e+07	6.68857e+07	9.6731e+07	8.55918e+07	1.00454e+08	7.65722e+07	8.91148e+07	7.82322e+07	1.01036e+08	9.757e+07	8.95401e+07	8.96533e+07
Panaquinquecol_1	2.61	level2			293.209	226.9	POS	1.49394e+08	1.63725e+08	1.8048e+08	1.56919e+08	1.78196e+08	1.47428e+08	2.00198e+08	1.72926e+08	2.18095e+08	1.91717e+08	1.82752e+08	1.69169e+08	1.36557e+08	1.2501e+08	1.38406e+08	1.11962e+08	1.09026e+08	1.16442e+08	1.20977e+08	1.19473e+08	1.03646e+08	1.30706e+08	1.29678e+08	1.42347e+08	1.50056e+08	1.54168e+08	1.4914e+08	1.54144e+08
Gly-His-Lys	2.61	level2			339.179	226.5	NEG	8.5369e+06	1.1341e+07	9.47468e+06	9.88882e+06	1.28207e+07	9.38219e+06	1.08329e+07	1.50249e+07	1.02085e+07	1.04731e+07	1.0244e+07	9.58311e+06	1.24135e+07	1.34285e+07	1.33186e+07	1.40589e+07	1.15428e+07	1.51516e+07	8.62346e+06	1.0507e+07	7.78844e+06	9.29631e+06	1.06576e+07	1.22853e+07	1.14376e+07	1.08349e+07	1.33288e+07	1.39527e+07
Capsiate	2.61	level2			307.189	216.4	POS	1.91821e+07	2.17366e+07	1.77756e+07	1.71459e+07	3.33495e+07	2.51549e+07	2.41086e+07	2.38391e+07	3.71483e+06	2.28662e+07	2.36843e+07	2.44096e+07	1.85967e+07	1.9364e+07	1.54643e+07	1.85484e+07	1.38204e+07	1.79098e+07	2.05928e+07	1.43944e+07	1.95593e+07	2.24426e+07	1.86411e+07	1.78811e+07	1.46327e+07	1.53797e+07	1.59525e+07	1.83107e+07
15-Ketoprostaglandin F2.alpha.	2.61	level2			353.23	213.1	POS	2.09661e+08	2.35918e+08	2.26594e+08	2.35676e+08	3.0414e+08	2.35773e+08	2.87957e+08	2.98183e+08	2.81538e+08	2.60055e+08	2.46122e+08	2.64065e+08	2.22496e+08	2.36437e+08	2.56366e+08	2.04876e+08	1.83198e+08	2.07838e+08	1.29939e+08	1.44969e+08	1.17817e+08	1.38291e+08	1.48563e+08	1.87072e+08	2.11002e+08	2.17177e+08	2.17575e+08	2.18006e+08
3-(2-(1,3-Benzodioxol-5-yl)-7-methoxy-1-benzofuran-5-yl)-3-hydroxypropyl hexopyranoside	2.61	level2			503.156	198.3	NEG	7.72988e+06	6.91806e+06	7.26738e+06	9.81557e+06	9.62163e+06	6.27402e+06	1.22352e+07	1.41261e+07	1.16454e+07	1.90253e+07	1.12944e+07	1.09701e+07	1.07988e+07	6.54546e+06	7.14365e+06	5.03291e+06	5.09094e+06	9.5984e+06	1.39388e+07	1.14438e+07	9.61445e+06	1.83405e+07	1.81734e+07	1.89836e+07	9.75886e+06	9.13114e+06	9.82521e+06	9.68375e+06
[truncated: 21,901 more rows]
