# Supplementary material for: Application of starch-degradation bacteria in cigar tobacco leaf fermentation: effects on starch degradation, microbial communities and metabolic pathways
Source: Front Microbiol. 2025 Jul 21;16:1632731. doi: 10.3389/fmicb.2025.1632731 (PMC12319561; doi:10.3389/fmicb.2025.1632731)
Supplement: Supplementary file 3 [file Table_3.XLSX]

## Sheet: Sheet1
MS2_name	MS2_score	level	MS1_name	MS1_ppm	mzmed	rtmed	type	BLS_4	BLS_5	BLS_6	BLS_7	BLS_8	BLS_9	CK_4	CK_5	CK_6	CK_7	CK_8	CK_9	DX_BLS_4	DX_BLS_5	DX_BLS_6	DX_BLS_7	DX_BLS_8	DX_BLS_9	DX_4	DX_5	DX_6	DX_7	DX_8	DX_9	QC01	QC02	QC03	QC04
5Z,8Z,11Z-Eicosatrienoic acid	3.99	level1			305.248	316.4	NEG	1.26232e+07	1.366e+07	1.21507e+07	1.25245e+07	1.4141e+07	1.32749e+07	1.03371e+07	9.38302e+06	1.13375e+07	1.02785e+07	1.09438e+07	9.75997e+06	1.36489e+07	1.16627e+07	1.07048e+07	9.91401e+06	9.26526e+06	9.28646e+06	9.99403e+06	1.26423e+07	1.04279e+07	1.17033e+07	1.09159e+07	1.23905e+07	9.98831e+06	1.15358e+07	1.06809e+07	1.19382e+07
Dodecanoic acid	3.99	level1			199.17	293.9	NEG	3.93766e+07	4.35869e+07	4.34255e+07	5.1737e+07	4.52132e+07	4.19563e+07	3.93377e+07	6.14888e+07	4.58574e+07	4.96663e+07	4.22278e+07	4.74252e+07	4.93582e+07	4.17787e+07	4.37274e+07	4.29769e+07	4.91964e+07	4.51673e+07	4.40109e+07	4.1523e+07	4.62229e+07	4.675e+07	5.63684e+07	4.1445e+07	4.22121e+07	4.64702e+07	4.57657e+07	4.83714e+07
7-[(2S,3R,4S,5S,6R)-4,5-dihydroxy-6-(hydroxymethyl)-3-[(2S,3R,4R,5R,6S)-3,4,5-trihydroxy-6-methyl-tetrahydropyran-2-yl]oxy-tetrahydropyran-2-yl]oxy-3,5-dihydroxy-2-(4-hydroxyphenyl)chromen-4-one	3.99	level1			595.165	189.3	POS	1.04368e+07	1.03381e+07	5.68612e+06	6.38619e+06	1.04761e+07	1.29536e+07	1.43426e+07	8.1068e+06	1.65783e+07	1.1602e+07	9.16447e+06	9.37881e+06	2.64385e+07	2.72895e+07	2.69724e+07	2.28904e+07	2.38317e+07	1.78227e+07	9.9221e+06	1.05702e+07	8.0247e+06	8.87485e+06	1.32094e+07	1.22586e+07	1.42173e+07	1.41117e+07	1.45699e+07	1.44002e+07
3-[4,5-dihydroxy-6-(hydroxymethyl)-3-[(2S,3R,4R,5R,6S)-3,4,5-trihydroxy-6-methyl-tetrahydropyran-2-yl]oxy-tetrahydropyran-2-yl]oxy-5,7-dihydroxy-2-(4-hydroxyphenyl)chromen-4-one	3.99	level1			595.165	189.3	POS	1.04368e+07	1.03381e+07	5.68612e+06	6.38619e+06	1.04761e+07	1.29536e+07	1.43426e+07	8.1068e+06	1.65783e+07	1.1602e+07	9.16447e+06	9.37881e+06	2.64385e+07	2.72895e+07	2.69724e+07	2.28904e+07	2.38317e+07	1.78227e+07	9.9221e+06	1.05702e+07	8.0247e+06	8.87485e+06	1.32094e+07	1.22586e+07	1.42173e+07	1.41117e+07	1.45699e+07	1.44002e+07
Kaempferol 3-neohesperidoside	3.98	level1			595.165	189.3	POS	1.04368e+07	1.03381e+07	5.68612e+06	6.38619e+06	1.04761e+07	1.29536e+07	1.43426e+07	8.1068e+06	1.65783e+07	1.1602e+07	9.16447e+06	9.37881e+06	2.64385e+07	2.72895e+07	2.69724e+07	2.28904e+07	2.38317e+07	1.78227e+07	9.9221e+06	1.05702e+07	8.0247e+06	8.87485e+06	1.32094e+07	1.22586e+07	1.42173e+07	1.41117e+07	1.45699e+07	1.44002e+07
Kaempferol	3.98	level1			287.055	221.7	POS	7.08297e+06	8.5492e+06	4.95493e+06	5.423e+06	6.16037e+06	9.78168e+06	7.9628e+06	8.22121e+06	9.53019e+06	9.42106e+06	2.61996e+06	5.45201e+06	1.69344e+07	1.72213e+07	2.27104e+07	9.27201e+06	9.12247e+06	7.02828e+06	6.54809e+06	6.42737e+06	4.6456e+06	5.52188e+06	7.1342e+06	4.87249e+06	9.06345e+06	8.67037e+06	8.63436e+06	8.38252e+06
beta-Carboline	3.98	level1			169.076	161.7	POS	2.96936e+07	3.47627e+07	3.99949e+07	3.85197e+07	3.88252e+07	3.87305e+07	3.97313e+07	5.35924e+07	4.17623e+07	4.46747e+07	4.10916e+07	3.97047e+07	1.23179e+08	1.08655e+08	1.19181e+08	1.37452e+08	1.43273e+08	1.69574e+08	2.30181e+07	2.34986e+07	2.88051e+07	1.71881e+07	1.75039e+07	3.56757e+07	1.79878e+07	1.50288e+07	4.39387e+07	4.46355e+07
Harmol	3.98	level1			199.087	159.7	POS	1.88353e+07	1.89457e+07	2.3206e+07	1.82409e+07	3.32578e+07	3.25921e+07	2.6584e+07	2.47692e+07	3.49398e+07	3.21542e+07	2.40432e+07	3.40027e+07	1.07404e+07	1.09023e+07	9.95621e+06	1.03992e+07	1.03392e+07	1.05374e+07	1.14595e+07	1.42409e+07	1.32416e+07	1.418e+07	1.12464e+07	1.54347e+07	2.99595e+07	1.65763e+07	1.64775e+07	1.68931e+07
8-hydroxy-4H-pyrrolo[1,2-a]indole-5-carboxylic acid	3.98	level1			214.051	200.2	NEG	1.18365e+07	1.23545e+07	1.15059e+07	9.39614e+06	1.01802e+07	1.12704e+07	8.85927e+06	1.22052e+07	8.51538e+06	1.11133e+07	4.42387e+06	3.68151e+06	1.65724e+07	1.30502e+07	8.37797e+06	1.8967e+07	1.45173e+07	1.82133e+07	9.30142e+06	9.09094e+06	9.43858e+06	1.01516e+07	6.51758e+06	9.87125e+06	1.20931e+07	9.83512e+06	8.96412e+06	6.18287e+06
Undecanoic acid	3.97	level1			185.155	284	NEG	1.11642e+07	1.36419e+07	1.28091e+07	1.39647e+07	1.4249e+07	1.32033e+07	1.22016e+07	1.31618e+07	1.37344e+07	1.19952e+07	1.12918e+07	1.13825e+07	1.30449e+07	1.33932e+07	1.29091e+07	1.32352e+07	1.38007e+07	1.49059e+07	1.24149e+07	1.38965e+07	1.22899e+07	1.47078e+07	1.46054e+07	1.29477e+07	1.01066e+07	1.00755e+07	1.07762e+07	1.08696e+07
1,10-dihydroxy-9-(hydroxymethyl)-1,2,6a,6b,9,12a-hexamethyl-2,3,4,5,6,6a,7,8,8a,10,11,12,13,14b-tetradecahydropicene-4a-carboxylic acid	3.97	level1			487.342	260.3	NEG	2.41157e+07	1.54108e+07	2.52636e+07	1.49656e+07	2.13261e+07	1.73748e+07	3.87366e+07	3.07495e+07	3.69217e+07	2.98952e+07	3.00548e+07	4.0119e+07	1.01171e+07	3.07524e+07	1.39863e+07	7.46836e+06	2.7141e+07	1.66465e+07	2.7425e+07	2.19235e+07	1.81962e+07	1.9973e+07	2.57601e+07	2.12734e+07	2.35855e+07	2.33457e+07	2.37625e+07	2.43776e+07
Undecanedioic acid	3.97	level1			197.118	232.6	NEG	2.89137e+07	2.18058e+07	1.9545e+07	2.26096e+07	3.52685e+07	3.13668e+07	3.42677e+07	2.21561e+07	3.65647e+07	2.33692e+07	2.70318e+07	2.43193e+07	2.34465e+07	2.78343e+07	4.00182e+07	2.60436e+07	2.43559e+07	2.39068e+07	2.48378e+07	2.63197e+07	4.88502e+07	2.95843e+07	3.00966e+07	2.54093e+07	2.92716e+07	2.74362e+07	2.68757e+07	2.72569e+07
(±)-Dihydroactinidiolide	3.97	level1			181.122	222.4	POS	4.17403e+08	4.65576e+08	4.69041e+08	4.92424e+08	4.77578e+08	4.37519e+08	4.86101e+08	5.31141e+08	4.83547e+08	4.61855e+08	4.5121e+08	4.12674e+08	3.80508e+08	3.85331e+08	3.91889e+08	4.39362e+08	3.47788e+08	3.66937e+08	3.83095e+08	4.32534e+08	4.62699e+08	4.39262e+08	4.22627e+08	4.07521e+08	4.33812e+08	4.48054e+08	4.48498e+08	4.46009e+08
5-Methoxyindole-3-acetic acid	3.97	level1			188.071	174.1	POS	6.75629e+07	7.69006e+07	8.23418e+07	7.98759e+07	7.67393e+07	6.36209e+07	5.13226e+07	5.82893e+07	5.16993e+07	6.15653e+07	5.58651e+07	4.82017e+07	9.11293e+07	8.10941e+07	8.35644e+07	9.26831e+07	7.9838e+07	8.37972e+07	6.82626e+07	7.77798e+07	6.05369e+07	6.83274e+07	6.21289e+07	5.65153e+07	7.1001e+07	7.21262e+07	7.10207e+07	7.02492e+07
Salicylic acid	3.97	level1			137.024	173.7	NEG	4.50891e+07	4.21555e+07	3.11289e+07	4.4649e+07	5.29853e+07	4.42894e+07	5.3632e+07	5.38715e+07	5.65898e+07	7.79917e+07	4.25498e+07	3.97042e+07	7.70943e+07	8.02343e+07	8.77957e+07	7.9422e+07	9.60021e+07	7.647e+07	9.20967e+07	9.26773e+07	1.18728e+08	1.16368e+08	1.04668e+08	9.30965e+07	7.4572e+07	7.35509e+07	7.12166e+07	7.27316e+07
2-Hydroxybutyric acid	3.97	level1			85.0296	28.2	NEG	6.97685e+07	5.48235e+07	5.50725e+07	5.5201e+07	5.95494e+07	6.05282e+07	5.50302e+07	5.32635e+07	5.89674e+07	4.83102e+07	5.73402e+07	5.68735e+07	7.7623e+07	9.26389e+07	8.83183e+07	8.46339e+07	5.37196e+07	8.53528e+07	7.6889e+07	8.95538e+07	1.03975e+08	8.64286e+07	8.03987e+07	8.01259e+07	6.80541e+07	7.63525e+07	7.2769e+07	6.34009e+07
Glycine	3.97	level1			76.0393	10.7	POS	6.62155e+06	7.37493e+06	7.5428e+06	1.41387e+07	1.37444e+07	8.17934e+06	7.97213e+06	7.23937e+06	5.90128e+06	7.9924e+06	8.10654e+06	8.1506e+06	7.75994e+06	6.86663e+06	8.11261e+06	7.06066e+06	7.19104e+06	1.4106e+07	6.97619e+06	1.44476e+07	1.49286e+07	7.91325e+06	8.56639e+06	1.44063e+07	7.14456e+06	1.50689e+07	8.85482e+06	1.46655e+07
Glycodeoxycholic acid	3.97	level1			448.308	287.4	NEG	1.11173e+07	1.24962e+07	1.59417e+07	1.42313e+07	1.49691e+07	1.13645e+07	1.13893e+07	2.14621e+07	1.20965e+07	1.86058e+07	1.7687e+07	1.48346e+07	7.2874e+06	5.94468e+06	6.72857e+06	9.06509e+06	7.19215e+06	8.49435e+06	6.59334e+06	7.97941e+06	6.8271e+06	5.89318e+06	3.32127e+06	7.73524e+06	1.01256e+07	1.03616e+07	1.07304e+07	1.0716e+07
1,1,9a-trimethyl-3,4,8,9-tetrahydro-2H-benzo[7]annulene-7-carboxylic acid	3.97	level1			233.155	286.7	NEG	1.45376e+07	1.6022e+07	1.59651e+07	1.71814e+07	1.66426e+07	1.53757e+07	1.64846e+07	2.26893e+07	1.82657e+07	2.28143e+07	1.70398e+07	1.8939e+07	1.93465e+07	1.4794e+07	1.80176e+07	1.81349e+07	1.60786e+07	1.73948e+07	1.78479e+07	2.03187e+07	2.09036e+07	1.88543e+07	1.72084e+07	2.23164e+07	1.77785e+07	1.78326e+07	1.86309e+07	1.85823e+07
Quillaic acid	3.97	level1			485.327	268.2	NEG	2.97798e+06	2.65621e+06	2.90034e+06	2.92304e+06	2.69838e+06	2.64705e+06	5.0015e+06	3.80837e+06	4.97335e+06	3.80285e+06	4.42893e+06	5.74761e+06	2.15419e+06	3.43138e+06	2.34796e+06	2.31673e+06	2.49645e+06	2.49263e+06	4.34289e+06	3.96704e+06	5.25488e+06	3.48583e+06	3.78982e+06	3.77065e+06	3.38626e+06	3.30117e+06	2.7066e+06	3.29976e+06
5,6,7-trihydroxy-2-(4-methoxyphenyl)chromen-4-one	3.97	level1			301.07	223.7	POS	6.58346e+06	7.14584e+06	8.53002e+06	8.28505e+06	7.32436e+06	8.22046e+06	2.22106e+07	8.12902e+06	1.73994e+07	2.41647e+07	3.31426e+07	1.06675e+07	8.63981e+06	7.29013e+06	7.9354e+06	7.27641e+06	6.47791e+06	6.45614e+06	5.03586e+06	7.2218e+06	6.47884e+06	5.05361e+06	5.81646e+06	5.22035e+06	1.06186e+07	1.0556e+07	1.05331e+07	1.09472e+07
13,14-Dihydro-15-ketotetranorprostaglandin F1.beta.	3.97	level1			299.187	207.5	NEG	4.14301e+07	3.9813e+07	4.44909e+07	4.17223e+07	4.76309e+07	4.1963e+07	4.05129e+07	4.46267e+07	3.5278e+07	4.4941e+07	4.25712e+07	4.05965e+07	3.54712e+07	3.24472e+07	3.41055e+07	3.53661e+07	3.62056e+07	3.15308e+07	3.30096e+07	3.74458e+07	3.47863e+07	3.49647e+07	3.93329e+07	4.36308e+07	4.12068e+07	3.97937e+07	3.89914e+07	3.83426e+07
Royal jelly acid	3.97	level1			185.118	207.4	NEG	2.85531e+07	2.21578e+07	2.3814e+07	2.38368e+07	2.5587e+07	4.42873e+07	3.50418e+07	3.22815e+07	3.24659e+07	3.1884e+07	3.28825e+07	3.64555e+07	2.69844e+07	2.40235e+07	2.59064e+07	2.80669e+07	2.82128e+07	2.57522e+07	2.60404e+07	2.64476e+07	3.2155e+07	2.99947e+07	3.16236e+07	3.17622e+07	2.80013e+07	2.78864e+07	2.90696e+07	2.99149e+07
(1R,9S)-11-acetyl-7,11-diazatricyclo[7.3.1.02,7]trideca-2,4-dien-6-one	3.97	level1			233.129	137.2	POS	7.66418e+06	6.04276e+06	4.63483e+06	5.21928e+06	4.05189e+06	7.90359e+06	6.51747e+06	5.71256e+06	9.13845e+06	6.10362e+06	6.17746e+06	6.45508e+06	3.01024e+07	2.83675e+07	3.37878e+07	2.8309e+07	2.49235e+07	3.39772e+07	7.58575e+06	9.60091e+06	8.21662e+06	9.62519e+06	1.1081e+07	5.24267e+06	1.31422e+07	1.20904e+07	1.32831e+07	1.3154e+07
cis-8,11,14-Eicosatrienoic acid	3.96	level1			305.248	316.4	NEG	1.26232e+07	1.366e+07	1.21507e+07	1.25245e+07	1.4141e+07	1.32749e+07	1.03371e+07	9.38302e+06	1.13375e+07	1.02785e+07	1.09438e+07	9.75997e+06	1.36489e+07	1.16627e+07	1.07048e+07	9.91401e+06	9.26526e+06	9.28646e+06	9.99403e+06	1.26423e+07	1.04279e+07	1.17033e+07	1.09159e+07	1.23905e+07	9.98831e+06	1.15358e+07	1.06809e+07	1.19382e+07
Nicotiflorin	3.96	level1			595.165	189.3	POS	1.04368e+07	1.03381e+07	5.68612e+06	6.38619e+06	1.04761e+07	1.29536e+07	1.43426e+07	8.1068e+06	1.65783e+07	1.1602e+07	9.16447e+06	9.37881e+06	2.64385e+07	2.72895e+07	2.69724e+07	2.28904e+07	2.38317e+07	1.78227e+07	9.9221e+06	1.05702e+07	8.0247e+06	8.87485e+06	1.32094e+07	1.22586e+07	1.42173e+07	1.41117e+07	1.45699e+07	1.44002e+07
Demethoxycapillarisin	3.96	level1			287.055	221.7	POS	7.08297e+06	8.5492e+06	4.95493e+06	5.423e+06	6.16037e+06	9.78168e+06	7.9628e+06	8.22121e+06	9.53019e+06	9.42106e+06	2.61996e+06	5.45201e+06	1.69344e+07	1.72213e+07	2.27104e+07	9.27201e+06	9.12247e+06	7.02828e+06	6.54809e+06	6.42737e+06	4.6456e+06	5.52188e+06	7.1342e+06	4.87249e+06	9.06345e+06	8.67037e+06	8.63436e+06	8.38252e+06
Arjunolic acid	3.96	level1			487.342	260.3	NEG	2.41157e+07	1.54108e+07	2.52636e+07	1.49656e+07	2.13261e+07	1.73748e+07	3.87366e+07	3.07495e+07	3.69217e+07	2.98952e+07	3.00548e+07	4.0119e+07	1.01171e+07	3.07524e+07	1.39863e+07	7.46836e+06	2.7141e+07	1.66465e+07	2.7425e+07	2.19235e+07	1.81962e+07	1.9973e+07	2.57601e+07	2.12734e+07	2.35855e+07	2.33457e+07	2.37625e+07	2.43776e+07
(10S,11R)-10,11-dihydroxy-9-(hydroxymethyl)-1,6a,6b,9,12a-pentamethyl-2-methylidene-1,3,4,5,6,6a,7,8,8a,10,11,12,13,14b-tetradecahydropicene-4a-carboxylic acid	3.96	level1			485.327	268.2	NEG	2.97798e+06	2.65621e+06	2.90034e+06	2.92304e+06	2.69838e+06	2.64705e+06	5.0015e+06	3.80837e+06	4.97335e+06	3.80285e+06	4.42893e+06	5.74761e+06	2.15419e+06	3.43138e+06	2.34796e+06	2.31673e+06	2.49645e+06	2.49263e+06	4.34289e+06	3.96704e+06	5.25488e+06	3.48583e+06	3.78982e+06	3.77065e+06	3.38626e+06	3.30117e+06	2.7066e+06	3.29976e+06
1,11-dihydroxy-1,2,6a,6b,9,9,12a-heptamethyl-10-oxo-3,4,5,6,6a,7,8,8a,11,12,13,14b-dodecahydro-2H-picene-4a-carboxylic acid	3.96	level1			485.327	268.2	NEG	2.97798e+06	2.65621e+06	2.90034e+06	2.92304e+06	2.69838e+06	2.64705e+06	5.0015e+06	3.80837e+06	4.97335e+06	3.80285e+06	4.42893e+06	5.74761e+06	2.15419e+06	3.43138e+06	2.34796e+06	2.31673e+06	2.49645e+06	2.49263e+06	4.34289e+06	3.96704e+06	5.25488e+06	3.48583e+06	3.78982e+06	3.77065e+06	3.38626e+06	3.30117e+06	2.7066e+06	3.29976e+06
(3aS,5aS,5bR,9S,11aR,13aR)-9-hydroxy-1-isopropenyl-5b,8,8,11a-tetramethyl-1,2,3,4,5,6,7,7a,9,10,11,11b,12,13,13a,13b-hexadecahydrocyclopenta[a]chrysene-3a,5a-dicarboxylic acid	3.96	level1			485.327	268.2	NEG	2.97798e+06	2.65621e+06	2.90034e+06	2.92304e+06	2.69838e+06	2.64705e+06	5.0015e+06	3.80837e+06	4.97335e+06	3.80285e+06	4.42893e+06	5.74761e+06	2.15419e+06	3.43138e+06	2.34796e+06	2.31673e+06	2.49645e+06	2.49263e+06	4.34289e+06	3.96704e+06	5.25488e+06	3.48583e+06	3.78982e+06	3.77065e+06	3.38626e+06	3.30117e+06	2.7066e+06	3.29976e+06
DEHP	3.96	level1			391.284	324.3	POS	5.18533e+06	5.61239e+06	3.46707e+06	5.61166e+06	4.91955e+06	9.18292e+06	9.12521e+06	1.10848e+07	7.36221e+06	1.3598e+07	7.46972e+06	6.63533e+06	6.6708e+06	4.37011e+06	5.20797e+06	2.57433e+06	4.4695e+06	5.39295e+06	3.99671e+06	1.09132e+07	2.53309e+06	2.52431e+06	2.99107e+06	4.02003e+06	5.14373e+06	7.26879e+06	6.17257e+06	7.90788e+06
Myristic acid	3.96	level1			227.201	309.8	NEG	1.67358e+08	1.90914e+08	1.85066e+08	1.97825e+08	1.91372e+08	1.88648e+08	2.14109e+08	1.69656e+08	1.7842e+08	2.01379e+08	2.0142e+08	1.8585e+08	1.7043e+08	1.43939e+08	1.51337e+08	1.32035e+08	1.66261e+08	1.37013e+08	1.69759e+08	1.60492e+08	1.76164e+08	1.62117e+08	1.67693e+08	2.15148e+08	1.60251e+08	1.73497e+08	1.79586e+08	1.81563e+08
16-Hydroxypalmitic acid	3.96	level1			271.228	276.1	NEG	2.93576e+07	3.10259e+07	2.98375e+07	2.32744e+07	2.69451e+07	2.83587e+07	3.52329e+07	3.33597e+07	3.54986e+07	3.03612e+07	2.89807e+07	3.50261e+07	3.01948e+07	2.93799e+07	2.98998e+07	3.18964e+07	3.09146e+07	3.12424e+07	2.65675e+07	2.86128e+07	7.29307e+07	2.85848e+07	3.55368e+07	2.88504e+07	3.27784e+07	2.69769e+07	2.79388e+07	2.76905e+07
ethyl octanoate	3.96	level1			171.139	274.8	NEG	2.06466e+07	2.58023e+07	2.09507e+07	1.96901e+07	2.11405e+07	2.19636e+07	2.15054e+07	2.18886e+07	2.2743e+07	2.28864e+07	2.75203e+07	2.10782e+07	2.6875e+07	2.4876e+07	2.1677e+07	2.70892e+07	2.75965e+07	2.53779e+07	2.49006e+07	2.51315e+07	2.17524e+07	2.62896e+07	2.05629e+07	2.31545e+07	1.67123e+07	1.84816e+07	1.83164e+07	1.91705e+07
Pelargonic acid	3.96	level1			157.123	263.6	NEG	1.13738e+08	1.25379e+08	1.14998e+08	1.18465e+08	1.18277e+08	1.13658e+08	1.12066e+08	1.13332e+08	1.19634e+08	1.07515e+08	1.09856e+08	1.1457e+08	1.30513e+08	1.22655e+08	1.22417e+08	1.22072e+08	1.26034e+08	1.21059e+08	1.20616e+08	1.16823e+08	1.25129e+08	1.27198e+08	1.22708e+08	1.19251e+08	7.00955e+07	6.99041e+07	6.91619e+07	7.19933e+07
Hexylresorcinol	3.96	level1			193.123	263.6	NEG	3.82415e+06	4.07733e+06	4.02238e+06	4.53495e+06	3.87843e+06	3.51356e+06	4.04176e+06	4.60163e+06	4.69315e+06	4.92613e+06	3.77466e+06	3.86737e+06	3.66909e+06	3.34028e+06	3.80894e+06	4.46088e+06	3.39667e+06	3.51052e+06	3.8729e+06	4.49634e+06	4.48149e+06	4.0924e+06	3.62574e+06	4.3119e+06	3.90468e+06	4.16413e+06	4.16379e+06	4.21846e+06
3-Phenoxybenzoic acid	3.96	level1			213.056	243.8	NEG	1.4565e+07	1.80715e+07	5.09137e+06	1.26248e+07	1.60103e+07	1.87479e+07	3.25793e+06	3.7578e+06	5.13941e+06	3.65112e+06	2.75036e+06	5.06852e+06	2.95879e+07	2.53918e+07	2.2275e+07	2.2645e+07	4.42455e+07	9.61103e+06	1.90253e+07	1.04504e+07	1.50031e+07	2.05535e+07	1.008e+07	2.66569e+07	1.45636e+07	1.439e+07	1.45007e+07	1.46037e+07
N-p-trans-Coumaroyltyramine	3.96	level1			284.128	198.8	POS	2.92593e+06	2.29185e+06	4.43038e+06	1.52452e+06	3.7632e+06	2.71795e+06	7.23481e+06	3.59351e+06	8.58981e+06	9.16481e+06	6.54887e+06	9.29387e+06	1.09602e+07	8.41037e+06	2.41466e+07	1.05929e+07	7.47392e+06	9.59252e+06	2.84081e+06	3.67505e+06	3.00441e+06	3.51158e+06	6.16683e+06	2.41067e+06	4.73431e+06	4.32339e+06	5.70843e+06	4.90921e+06
Indoleacetic acid	3.96	level1			176.071	181.5	POS	8.16811e+06	7.14779e+06	7.58723e+06	8.06168e+06	8.09666e+06	8.14538e+06	6.6122e+06	7.10286e+06	5.81325e+06	7.8189e+06	5.69927e+06	6.27428e+06	8.70688e+06	7.08686e+06	7.14237e+06	7.11769e+06	7.6994e+06	6.9758e+06	7.26459e+06	7.86126e+06	6.91867e+06	7.41125e+06	5.23729e+06	8.8128e+06	7.71148e+06	7.44153e+06	7.36659e+06	8.11315e+06
Carbendazim	3.96	level1			192.077	160.2	POS	2.14886e+09	1.05612e+09	3.53386e+08	1.68359e+09	4.4614e+09	1.84677e+09	8.39677e+06	8.87312e+06	8.40071e+06	9.20606e+06	8.49439e+06	8.89713e+06	1.22229e+07	1.00826e+07	1.0815e+07	1.25522e+07	1.5736e+07	2.09551e+07	5.77889e+07	8.63176e+06	7.8097e+06	2.00372e+07	9.33731e+06	8.9603e+06	4.85655e+08	4.81075e+08	4.83417e+08	4.78776e+08
3,3-Dimethylglutaric acid	3.96	level1			159.066	159.8	NEG	1.36381e+08	1.18872e+08	1.42292e+08	1.37023e+08	1.1907e+08	1.56506e+08	1.42628e+08	1.91961e+08	1.66214e+08	1.82211e+08	1.65004e+08	2.00812e+08	1.29316e+08	1.36954e+08	1.53455e+08	1.5327e+08	1.27132e+08	1.10996e+08	1.19711e+08	1.66176e+08	1.84606e+08	1.5656e+08	1.60216e+08	1.62827e+08	1.40517e+08	1.38543e+08	1.74994e+08	1.40862e+08
Acetylleucine	3.96	level1			172.098	142	NEG	5.80403e+07	5.01332e+07	5.83229e+07	4.89393e+07	4.91224e+07	5.54086e+07	7.89906e+07	1.234e+08	8.22963e+07	1.23049e+08	6.59871e+07	1.60931e+08	1.31676e+08	1.26028e+08	1.30418e+08	6.72133e+07	4.87471e+07	1.4868e+08	9.14755e+07	7.89471e+07	8.05545e+07	7.65326e+07	7.91966e+07	8.09022e+07	6.89571e+07	1.2138e+08	6.61561e+07	6.68682e+07
Phenylacetylglycine	3.96	level1			192.067	139.7	NEG	1.4758e+07	1.27904e+07	1.39548e+07	1.3763e+07	1.46996e+07	1.18553e+07	1.27373e+07	1.48092e+07	1.24229e+07	1.69589e+07	1.42981e+07	1.38381e+07	1.53109e+07	1.53201e+07	1.58889e+07	1.60899e+07	1.47006e+07	1.67509e+07	1.56687e+07	1.55271e+07	1.60407e+07	1.56371e+07	1.58069e+07	1.74796e+07	1.41718e+07	1.66922e+07	1.55692e+07	1.41429e+07
3'-O-Methyladenosine	3.96	level1			282.12	104.6	POS	3.5706e+06	5.06623e+06	7.02015e+06	2.11027e+07	1.42225e+07	1.1286e+07	8.72766e+06	1.18303e+07	1.04968e+07	1.43819e+07	1.01429e+07	6.90608e+06	2.03104e+07	1.72166e+07	1.7879e+07	1.84225e+07	8.25191e+06	1.04658e+07	1.10684e+07	1.56095e+07	3.94123e+06	5.3043e+06	1.27305e+07	1.1705e+07	1.40851e+07	5.82479e+06	1.16083e+07	1.3383e+07
Itaconic acid	3.96	level1			129.019	41.9	NEG	2.24416e+07	4.82803e+07	1.39213e+07	1.67159e+07	2.03484e+07	2.87429e+07	4.32796e+07	1.65422e+07	4.66092e+07	1.43357e+07	3.53533e+07	2.92083e+07	5.00616e+07	6.03604e+07	6.06735e+07	6.38379e+07	4.34839e+07	5.72402e+07	4.9361e+07	5.33763e+07	6.05721e+07	5.9332e+07	4.99231e+07	5.03762e+07	5.15358e+07	4.73903e+07	3.80343e+07	3.28886e+07
Acetylproline	3.96	level1			156.066	29.5	NEG	1.64077e+07	1.62129e+07	1.64967e+07	1.53552e+07	1.58792e+07	1.57898e+07	1.36604e+07	1.49225e+07	1.5587e+07	1.40865e+07	1.53703e+07	1.45807e+07	1.75729e+07	1.72971e+07	1.89531e+07	1.62018e+07	1.29737e+07	1.61792e+07	1.63942e+07	1.67622e+07	1.74672e+07	1.67508e+07	1.54736e+07	1.60482e+07	1.65901e+07	1.60675e+07	1.59523e+07	1.58695e+07
1-Methylpyrrolidine	3.96	level1			86.0963	26.6	POS	1.13387e+07	1.52669e+07	1.99984e+07	2.6474e+07	2.32278e+07	1.84393e+07	1.45687e+07	2.12749e+07	3.26376e+06	1.94386e+07	1.71064e+07	1.75277e+07	1.99544e+07	9.7073e+06	1.71436e+07	2.08336e+07	2.04047e+07	2.15829e+07	2.18379e+07	2.16739e+07	1.32816e+07	1.84243e+07	1.6719e+07	1.95664e+07	2.02652e+07	2.01366e+07	2.06198e+07	1.42087e+07
(-)-Chinasure; (-)-Quinicacid	3.96	level1			191.056	23.6	NEG	2.45112e+08	2.39183e+08	1.98798e+08	2.53528e+08	2.95438e+08	2.57672e+08	4.58596e+08	3.40524e+08	3.82894e+08	4.46287e+08	2.60573e+08	2.89767e+08	3.24551e+08	3.06376e+08	3.20254e+08	3.34408e+08	2.78024e+08	3.09086e+08	2.9168e+08	3.32372e+08	3.31816e+08	3.47259e+08	3.20174e+08	3.183e+08	2.82342e+08	2.88242e+08	2.89688e+08	2.82094e+08
[3-[2,3-dihydroxypropoxy(hydroxy)phosphoryl]oxy-2-hydroxypropyl] 14-methylpentadecanoate	3.96	level1			483.274	328.2	NEG	4.88182e+06	3.31133e+06	3.38415e+06	5.24826e+06	4.17783e+06	5.16299e+06	3.34572e+06	2.80052e+06	2.24313e+06	3.9458e+06	4.88818e+06	4.76914e+06	7.33871e+06	5.69012e+06	6.80696e+06	5.42797e+06	9.32251e+06	8.53032e+06	3.54929e+06	4.58174e+06	4.23746e+06	4.40294e+06	5.05989e+06	5.42342e+06	4.58253e+06	5.47701e+06	6.24467e+06	5.87665e+06
Pyropheophorbide-a	3.96	level1			535.27	314.4	POS	1.17365e+08	1.45693e+08	1.41206e+08	1.33157e+08	9.8562e+07	1.44955e+08	6.47929e+07	8.53566e+07	8.188e+07	9.38969e+07	8.79105e+07	8.00201e+07	6.69043e+07	6.18266e+07	7.30606e+07	6.87526e+07	8.22271e+07	5.8331e+07	7.7621e+07	1.19106e+08	1.45931e+08	9.18224e+07	1.29485e+08	7.98077e+07	9.63856e+07	1.09291e+08	1.05324e+08	1.09138e+08
14-hydroxy-16-methoxy-4-methyl-3-oxabicyclo[10.4.0]hexadeca-1(12),13,15-trien-2-one	3.96	level1			291.16	260.3	NEG	3.66763e+06	4.59088e+06	4.75787e+06	4.7693e+06	5.60574e+06	5.47636e+06	5.92595e+07	5.77464e+06	6.06742e+06	7.42722e+06	1.30087e+08	2.09857e+08	4.96438e+06	3.97733e+06	5.25656e+06	4.16377e+06	4.45229e+06	4.04219e+06	4.03406e+06	3.81126e+06	4.5952e+06	4.23353e+06	5.44088e+06	6.50198e+06	1.55948e+07	1.71819e+07	1.60575e+07	1.81826e+07
Asperphenamate	3.96	level1			507.227	259.3	POS	1.16747e+07	1.15911e+07	6.11854e+06	7.07141e+06	4.75071e+06	1.81249e+07	1.36773e+07	6.10852e+06	5.07032e+06	8.49292e+06	9.64456e+06	1.13074e+07	1.58105e+07	4.13512e+07	3.10289e+07	3.01253e+07	1.96117e+07	1.86694e+07	1.7517e+07	2.58892e+07	3.21497e+07	2.11517e+07	1.9018e+07	1.29686e+07	1.683e+07	1.73007e+07	1.65358e+07	1.78538e+07
Shogaol	3.96	level1			277.18	256.1	POS	1.62701e+07	1.81279e+07	1.55151e+07	2.48955e+07	2.07625e+07	1.24156e+07	1.55032e+07	2.28684e+07	1.68563e+07	2.04268e+07	1.05212e+07	1.83779e+07	1.89605e+07	2.19741e+07	2.02604e+07	1.7771e+07	1.2543e+07	1.64049e+07	2.05359e+07	3.00077e+07	2.87089e+07	2.61326e+07	1.8309e+07	1.57857e+07	8.67856e+06	2.37633e+07	1.78983e+07	1.92561e+07
6,9a,11a-Trimethyl-4-oxo-1,2,3a,3b,5,5a,7,8,9,9b,10,11-dodecahydronaphtho[1,2-g][1]benzofuran-6-carboxylic acid	3.96	level1			333.208	253.3	NEG	1.49929e+07	5.06007e+07	1.6042e+07	4.68798e+07	5.23892e+07	1.52856e+07	1.5507e+07	5.96872e+07	1.35641e+07	1.66837e+07	2.06392e+07	1.58823e+07	1.36129e+07	1.0904e+07	3.74902e+07	1.38362e+07	3.29448e+07	3.17458e+07	1.40608e+07	1.30799e+07	1.21535e+07	3.44538e+07	1.5258e+07	5.3366e+07	1.34433e+07	1.45137e+07	1.66233e+07	1.42876e+07
(1S,5R,9S,12S)-16-isopropyl-5,9-dimethyl-13,14-dioxatetracyclo[10.2.2.01,10.04,9]hexadec-15-ene-5-carboxylic acid	3.96	level1			333.208	253.3	NEG	1.49929e+07	5.06007e+07	1.6042e+07	4.68798e+07	5.23892e+07	1.52856e+07	1.5507e+07	5.96872e+07	1.35641e+07	1.66837e+07	2.06392e+07	1.58823e+07	1.36129e+07	1.0904e+07	3.74902e+07	1.38362e+07	3.29448e+07	3.17458e+07	1.40608e+07	1.30799e+07	1.21535e+07	3.44538e+07	1.5258e+07	5.3366e+07	1.34433e+07	1.45137e+07	1.66233e+07	1.42876e+07
(1R,2R,4S,16R,17R,20S)-2-hydroxy-13,20-dimethoxy-4,7,17,22,22-pentamethyl-5,10,21,23-tetraoxahexacyclo[18.2.1.01,17.04,16.06,14.08,12]tricosa-6(14),7,12-trien-11-one	3.96	level1			473.219	251	NEG	5.45763e+06	4.75391e+06	5.31119e+06	6.52843e+06	5.56644e+06	3.80213e+06	4.87442e+06	4.3345e+06	3.80552e+06	3.98548e+06	3.72137e+06	4.43983e+06	4.25348e+06	4.98698e+06	4.22127e+06	5.37694e+06	4.02787e+06	6.80687e+06	4.1988e+06	4.79572e+06	3.93368e+06	3.66452e+06	2.50054e+07	6.64742e+06	6.10264e+06	5.99609e+06	6.0831e+06	5.32559e+06
Aurantiamide acetate	3.96	level1			443.197	245.8	NEG	3.02721e+06	3.20095e+06	3.4391e+06	2.75406e+06	3.56572e+06	1.28927e+07	4.79856e+06	3.92111e+06	4.01907e+06	2.9471e+06	3.41652e+06	1.71925e+07	2.83035e+06	4.91231e+06	3.84354e+06	3.74277e+06	7.896e+06	4.56243e+06	1.01698e+07	4.39011e+06	3.24168e+06	4.09456e+06	8.28664e+06	4.9467e+06	3.77964e+06	4.41353e+06	4.80985e+06	4.82127e+06
(1S,5S,8R,9S)-9-hydroxy-2,5,9-trimethyltricyclo[6.3.0.01,5]undec-2-ene-3-carboxylic acid	3.96	level1			249.149	224	NEG	1.49169e+07	1.49244e+07	1.42694e+07	1.62324e+07	1.44575e+07	2.20646e+07	1.91801e+07	1.89273e+07	1.66142e+07	1.75091e+07	1.72559e+07	1.9749e+07	1.89482e+07	1.79848e+07	1.89224e+07	1.90295e+07	1.96192e+07	1.77984e+07	2.17219e+07	2.2474e+07	2.32705e+07	2.23972e+07	2.19464e+07	2.28091e+07	1.79148e+07	1.90295e+07	1.83909e+07	1.94341e+07
2-[(2,6-dimethylphenyl)carbamoyl]benzoic acid	3.96	level1			268.098	215.3	NEG	1.66974e+07	1.72261e+07	1.60423e+07	1.44477e+07	1.55441e+07	1.77513e+07	8.04238e+06	1.28017e+07	4.52347e+06	1.60266e+07	1.56429e+07	1.25119e+07	1.84079e+07	2.19954e+07	2.0912e+07	2.80629e+07	1.81436e+07	2.37423e+07	2.05053e+07	2.79615e+07	2.46987e+07	1.96548e+07	1.39781e+07	2.18453e+07	1.90823e+07	1.88059e+07	1.76188e+07	1.88758e+07
5-[5-hydroxy-3-(hydroxymethyl)pentyl]-8a-(hydroxymethyl)-5,6-dimethyl-3,4,4a,6,7,8-hexahydronaphthalene-1-carboxylic acid	3.96	level1			353.233	210.1	NEG	1.03479e+08	9.03368e+07	1.12298e+08	8.84174e+07	9.41956e+07	1.28866e+08	1.41838e+08	1.25184e+08	1.53725e+07	1.1387e+08	1.41006e+08	2.37048e+07	8.636e+07	8.57241e+07	7.78118e+07	8.00482e+07	8.46767e+07	8.1631e+07	1.07211e+08	1.07673e+08	1.17863e+08	9.54519e+07	1.1785e+08	1.00674e+08	9.90305e+07	1.04802e+08	1.01784e+08	1.07568e+08
2-acetylbenzoic acid	3.96	level1			163.04	175.7	NEG	3.99955e+08	3.91568e+08	3.68326e+08	3.78841e+08	3.84874e+08	3.87732e+08	4.11978e+08	4.47819e+08	3.99522e+08	4.0704e+08	3.76624e+08	4.00825e+08	3.58351e+08	3.24479e+08	3.59833e+08	3.4513e+08	2.93369e+08	3.03806e+08	3.89113e+08	4.55427e+08	4.73113e+08	4.12952e+08	3.63333e+08	4.03563e+08	3.9475e+08	3.84689e+08	3.97192e+08	3.88076e+08
4-methoxy-2H-isoquinolin-1-one	3.96	level1			176.071	161	POS	2.75527e+07	2.35164e+07	1.8085e+07	2.97997e+07	3.18375e+07	2.92871e+07	3.62436e+07	3.1417e+07	4.32158e+07	3.13553e+07	2.52113e+07	3.0296e+07	2.42943e+07	2.7698e+07	3.08377e+07	2.64194e+07	2.60341e+07	2.45402e+07	3.52679e+07	4.04578e+07	6.34581e+07	4.63816e+07	4.25694e+07	3.44212e+07	3.30128e+07	3.3581e+07	3.28344e+07	3.39436e+07
Lonicerin	3.95	level1			595.165	189.3	POS	1.04368e+07	1.03381e+07	5.68612e+06	6.38619e+06	1.04761e+07	1.29536e+07	1.43426e+07	8.1068e+06	1.65783e+07	1.1602e+07	9.16447e+06	9.37881e+06	2.64385e+07	2.72895e+07	2.69724e+07	2.28904e+07	2.38317e+07	1.78227e+07	9.9221e+06	1.05702e+07	8.0247e+06	8.87485e+06	1.32094e+07	1.22586e+07	1.42173e+07	1.41117e+07	1.45699e+07	1.44002e+07
3-[(2S,3R,4S,5R,6R)-3,5-dihydroxy-6-(hydroxymethyl)-4-[(2S,3R,4R,5R,6S)-3,4,5-trihydroxy-6-methyl-tetrahydropyran-2-yl]oxy-tetrahydropyran-2-yl]oxy-5,7-dihydroxy-2-(4-hydroxyphenyl)chromen-4-one	3.95	level1			595.165	189.3	POS	1.04368e+07	1.03381e+07	5.68612e+06	6.38619e+06	1.04761e+07	1.29536e+07	1.43426e+07	8.1068e+06	1.65783e+07	1.1602e+07	9.16447e+06	9.37881e+06	2.64385e+07	2.72895e+07	2.69724e+07	2.28904e+07	2.38317e+07	1.78227e+07	9.9221e+06	1.05702e+07	8.0247e+06	8.87485e+06	1.32094e+07	1.22586e+07	1.42173e+07	1.41117e+07	1.45699e+07	1.44002e+07
2-(3,4-dihydroxyphenyl)-5-hydroxy-7-[(2S,3R,4S,5S,6R)-3,4,5-trihydroxy-6-[[(2R,3R,4R,5R,6S)-3,4,5-trihydroxy-6-methyl-tetrahydropyran-2-yl]oxymethyl]tetrahydropyran-2-yl]oxy-chromen-4-one	3.95	level1			595.165	189.3	POS	1.04368e+07	1.03381e+07	5.68612e+06	6.38619e+06	1.04761e+07	1.29536e+07	1.43426e+07	8.1068e+06	1.65783e+07	1.1602e+07	9.16447e+06	9.37881e+06	2.64385e+07	2.72895e+07	2.69724e+07	2.28904e+07	2.38317e+07	1.78227e+07	9.9221e+06	1.05702e+07	8.0247e+06	8.87485e+06	1.32094e+07	1.22586e+07	1.42173e+07	1.41117e+07	1.45699e+07	1.44002e+07
beta-Chamigrenic acid	3.95	level1			233.155	286.7	NEG	1.45376e+07	1.6022e+07	1.59651e+07	1.71814e+07	1.66426e+07	1.53757e+07	1.64846e+07	2.26893e+07	1.82657e+07	2.28143e+07	1.70398e+07	1.8939e+07	1.93465e+07	1.4794e+07	1.80176e+07	1.81349e+07	1.60786e+07	1.73948e+07	1.78479e+07	2.03187e+07	2.09036e+07	1.88543e+07	1.72084e+07	2.23164e+07	1.77785e+07	1.78326e+07	1.86309e+07	1.85823e+07
Kaempferol 3-methyl ether	3.95	level1			301.07	223.7	POS	6.58346e+06	7.14584e+06	8.53002e+06	8.28505e+06	7.32436e+06	8.22046e+06	2.22106e+07	8.12902e+06	1.73994e+07	2.41647e+07	3.31426e+07	1.06675e+07	8.63981e+06	7.29013e+06	7.9354e+06	7.27641e+06	6.47791e+06	6.45614e+06	5.03586e+06	7.2218e+06	6.47884e+06	5.05361e+06	5.81646e+06	5.22035e+06	1.06186e+07	1.0556e+07	1.05331e+07	1.09472e+07
Capric acid	3.95	level1			171.139	274.8	NEG	2.06466e+07	2.58023e+07	2.09507e+07	1.96901e+07	2.11405e+07	2.19636e+07	2.15054e+07	2.18886e+07	2.2743e+07	2.28864e+07	2.75203e+07	2.10782e+07	2.6875e+07	2.4876e+07	2.1677e+07	2.70892e+07	2.75965e+07	2.53779e+07	2.49006e+07	2.51315e+07	2.17524e+07	2.62896e+07	2.05629e+07	2.31545e+07	1.67123e+07	1.84816e+07	1.83164e+07	1.91705e+07
3-O-Acetylursolic acid	3.95	level1			497.364	327	NEG	6.18227e+06	6.76741e+06	7.05282e+06	7.68277e+06	9.56244e+06	5.25458e+06	7.77411e+06	8.47322e+06	6.05244e+06	1.21254e+07	1.07489e+07	8.85314e+06	5.87534e+06	3.17693e+06	2.27932e+06	3.82253e+06	2.91579e+06	3.73015e+06	4.32647e+06	4.07979e+06	4.36012e+06	5.6081e+06	6.71176e+06	7.95554e+06	6.35702e+06	8.85899e+06	5.22168e+06	9.23676e+06
Palmitamide	3.95	level1			256.263	309.8	POS	1.17523e+09	1.13215e+09	1.07873e+09	1.88434e+09	1.81501e+09	1.68461e+09	1.37089e+09	1.04956e+09	1.08425e+09	1.0122e+09	1.05191e+09	1.02996e+09	9.54555e+08	9.15661e+08	8.26032e+08	9.51243e+08	1.21827e+09	1.24797e+09	1.05995e+09	1.67009e+09	9.69782e+08	9.19951e+08	1.80631e+09	1.30537e+09	1.20582e+09	1.32435e+09	1.27345e+09	1.35733e+09
Lufenuron	3.95	level1			508.972	278.8	NEG	2.39297e+08	2.6544e+08	5.90646e+08	3.81814e+08	2.9014e+08	3.52294e+08	3.17561e+08	4.26272e+08	3.22566e+08	3.42861e+08	4.22525e+08	3.40666e+08	6.6616e+07	4.2928e+07	6.20102e+07	5.20309e+07	4.21873e+07	7.26078e+07	6.25304e+07	7.14593e+07	2.36787e+08	1.44702e+08	1.9859e+08	2.04513e+08	2.29687e+08	2.36106e+08	2.39203e+08	2.31401e+08
Sphingosine	3.95	level1			282.279	259.9	POS	9.86541e+07	6.28511e+07	6.8872e+07	6.13138e+07	1.15011e+08	5.47157e+07	5.19519e+07	6.51457e+07	5.10645e+07	5.76008e+07	4.71794e+07	9.44655e+07	5.71515e+07	8.80992e+07	5.81709e+07	8.24406e+07	4.98673e+07	5.40072e+07	6.55585e+07	6.61915e+07	6.37486e+07	6.00249e+07	6.66203e+07	6.7463e+07	6.29061e+07	5.49646e+07	5.33962e+07	5.27286e+07
Valproic acid	3.95	level1			143.108	251.7	NEG	9.7823e+06	1.02658e+07	7.21112e+06	9.37836e+06	8.26111e+06	7.74114e+06	9.95391e+06	8.36916e+06	6.90624e+06	8.04729e+06	8.53926e+06	7.84164e+06	9.85515e+06	1.13848e+07	9.20904e+06	9.52703e+06	8.56251e+06	1.08665e+07	9.11632e+06	1.00801e+07	6.77856e+06	1.15034e+07	7.49994e+06	8.02199e+06	4.26071e+06	4.46121e+06	5.97061e+06	6.60657e+06
2-Naphthol	3.95	level1			143.05	227.3	NEG	1.2094e+07	1.60328e+07	1.53917e+07	2.05956e+07	2.10909e+07	1.67656e+07	1.46206e+07	1.21543e+07	1.46206e+07	1.67671e+07	1.32181e+07	1.64924e+07	1.00766e+07	1.12509e+07	1.58751e+07	1.1362e+07	1.59094e+07	1.72905e+07	1.38205e+07	2.14706e+07	1.23242e+07	1.73605e+07	9.87573e+06	1.81218e+07	1.50988e+07	1.494e+07	1.57919e+07	1.56866e+07
2-Phenylacetamide	3.95	level1			136.076	154.3	POS	2.83138e+07	2.75047e+07	2.11901e+07	3.1366e+07	3.6304e+07	2.54586e+07	1.77322e+07	2.12007e+07	2.36725e+07	2.41655e+07	1.79663e+07	1.72756e+07	4.12828e+07	3.48645e+07	3.57938e+07	4.85191e+07	4.04183e+07	4.3781e+07	2.24415e+07	2.73985e+07	2.58868e+07	2.66309e+07	2.21743e+07	2.91421e+07	2.99301e+07	2.83615e+07	2.95579e+07	2.92655e+07
3-Methylglutaric acid	3.95	level1			145.05	95.6	NEG	3.99622e+07	3.19793e+07	7.42955e+07	3.84423e+07	3.59381e+07	6.82379e+07	3.64074e+07	8.77227e+07	3.24604e+07	4.53333e+07	4.33194e+07	7.93094e+07	4.66031e+07	7.23333e+07	4.16772e+07	3.68567e+07	6.08825e+07	3.34393e+07	3.27151e+07	4.1299e+07	4.3073e+07	2.51092e+07	3.71339e+07	4.46604e+07	7.45074e+07	7.20719e+07	4.20443e+07	3.85917e+07
Pro-Phe	3.95	level1			263.139	57.5	POS	1.30033e+07	1.34957e+07	1.04838e+07	1.41741e+07	1.59753e+07	1.2577e+07	7.20901e+06	8.02632e+06	9.16035e+06	5.14317e+06	7.27947e+06	6.52135e+06	1.22063e+07	1.17993e+07	1.18361e+07	1.50138e+07	1.14335e+07	1.30931e+07	1.11241e+07	1.17131e+07	1.23914e+07	1.37918e+07	9.56483e+06	1.06993e+07	1.21584e+07	1.21941e+07	1.2403e+07	1.07169e+07
Aminohippuric acid	3.95	level1			193.062	45.2	NEG	9.69111e+06	9.51402e+06	1.12496e+07	1.12942e+07	7.5875e+06	8.16932e+06	8.99701e+06	1.03594e+07	7.85788e+06	6.48206e+06	8.91408e+06	1.25414e+07	1.77636e+07	1.94171e+07	2.08247e+07	1.77379e+07	4.40252e+07	4.41768e+07	1.34197e+07	1.71283e+07	1.26658e+07	1.55774e+07	1.20699e+07	1.28648e+07	1.33721e+07	1.33878e+07	1.30874e+07	1.27756e+07
Fructose	3.95	level1			203.053	9	POS	2.44168e+06	1.65019e+06	2.73173e+06	3.69226e+06	5.1751e+06	1.82313e+06	3.71931e+06	1.90275e+06	1.82802e+06	2.87371e+06	5.32559e+06	1.82255e+06	2.03066e+06	1.61728e+06	3.31277e+06	1.75637e+06	2.74161e+06	4.34418e+06	4.13867e+06	3.15666e+06	4.74463e+06	1.46985e+06	2.41325e+06	4.06652e+06	4.02161e+06	2.56804e+06	2.8712e+06	3.86585e+06
Galactose	3.95	level1			203.053	9	POS	2.44168e+06	1.65019e+06	2.73173e+06	3.69226e+06	5.1751e+06	1.82313e+06	3.71931e+06	1.90275e+06	1.82802e+06	2.87371e+06	5.32559e+06	1.82255e+06	2.03066e+06	1.61728e+06	3.31277e+06	1.75637e+06	2.74161e+06	4.34418e+06	4.13867e+06	3.15666e+06	4.74463e+06	1.46985e+06	2.41325e+06	4.06652e+06	4.02161e+06	2.56804e+06	2.8712e+06	3.86585e+06
Sorbose	3.95	level1			203.053	9	POS	2.44168e+06	1.65019e+06	2.73173e+06	3.69226e+06	5.1751e+06	1.82313e+06	3.71931e+06	1.90275e+06	1.82802e+06	2.87371e+06	5.32559e+06	1.82255e+06	2.03066e+06	1.61728e+06	3.31277e+06	1.75637e+06	2.74161e+06	4.34418e+06	4.13867e+06	3.15666e+06	4.74463e+06	1.46985e+06	2.41325e+06	4.06652e+06	4.02161e+06	2.56804e+06	2.8712e+06	3.86585e+06
Tagatose	3.95	level1			203.053	9	POS	2.44168e+06	1.65019e+06	2.73173e+06	3.69226e+06	5.1751e+06	1.82313e+06	3.71931e+06	1.90275e+06	1.82802e+06	2.87371e+06	5.32559e+06	1.82255e+06	2.03066e+06	1.61728e+06	3.31277e+06	1.75637e+06	2.74161e+06	4.34418e+06	4.13867e+06	3.15666e+06	4.74463e+06	1.46985e+06	2.41325e+06	4.06652e+06	4.02161e+06	2.56804e+06	2.8712e+06	3.86585e+06
Allose	3.95	level1			203.053	9	POS	2.44168e+06	1.65019e+06	2.73173e+06	3.69226e+06	5.1751e+06	1.82313e+06	3.71931e+06	1.90275e+06	1.82802e+06	2.87371e+06	5.32559e+06	1.82255e+06	2.03066e+06	1.61728e+06	3.31277e+06	1.75637e+06	2.74161e+06	4.34418e+06	4.13867e+06	3.15666e+06	4.74463e+06	1.46985e+06	2.41325e+06	4.06652e+06	4.02161e+06	2.56804e+06	2.8712e+06	3.86585e+06
2-Hydroxypalmitic acid	3.95	level1			271.228	295.2	NEG	5.64904e+07	6.49135e+07	5.70587e+07	3.77905e+07	5.60621e+07	6.27886e+07	5.71528e+07	5.99613e+07	6.10378e+07	3.92514e+07	3.86811e+07	6.5564e+07	5.3238e+07	5.33297e+07	5.2679e+07	5.34787e+07	5.57137e+07	5.53799e+07	5.31878e+07	5.70836e+07	5.03442e+07	5.82949e+07	4.93971e+07	5.27667e+07	5.90523e+07	3.649e+07	3.65262e+07	3.71106e+07
5-(5-methoxycarbonyl-5,8a-dimethyl-2-methylene-decalin-1-yl)-3-methyl-pentanoic acid	3.95	level1			349.238	294.6	NEG	3.95769e+06	4.24659e+06	4.42888e+06	4.1899e+06	4.13241e+06	3.80279e+06	4.12722e+06	5.54412e+06	3.70179e+06	5.58912e+06	6.00006e+06	4.55952e+06	4.71091e+06	4.1951e+06	5.42229e+06	5.33764e+06	4.91814e+06	5.6964e+06	6.08031e+06	6.89506e+06	6.00374e+06	4.66975e+06	4.30522e+06	5.23568e+06	4.69883e+06	4.84434e+06	5.04337e+06	5.62256e+06
(1S,2R,4aS,6aS,6bR,10S,11R,12aR,14bS)-10,11-dihydroxy-1,2,6a,6b,9,9,12a-heptamethyl-2,3,4,5,6,6a,7,8,8a,10,11,12,13,14b-tetradecahydro-1H-picene-4a-carboxylic acid	3.95	level1			471.349	288	NEG	4.86048e+07	2.02592e+07	3.96875e+07	1.35083e+07	4.09613e+07	2.3516e+07	7.58807e+07	4.0478e+07	4.88869e+07	6.0181e+07	5.04378e+07	6.57543e+07	1.66318e+07	7.03966e+07	2.58966e+07	1.07223e+07	6.38486e+07	3.98523e+07	5.70331e+07	4.4554e+07	4.06063e+07	3.56041e+07	5.96572e+07	4.54884e+07	4.23947e+07	4.46036e+07	4.5919e+07	4.63455e+07
(1S,2R,4aS,6aS,6bR,10R,11R,12aR,14bS)-10,11-dihydroxy-1,2,6a,6b,9,9,12a-heptamethyl-2,3,4,5,6,6a,7,8,8a,10,11,12,13,14b-tetradecahydro-1H-picene-4a-carboxylic acid	3.95	level1			471.349	288	NEG	4.86048e+07	2.02592e+07	3.96875e+07	1.35083e+07	4.09613e+07	2.3516e+07	7.58807e+07	4.0478e+07	4.88869e+07	6.0181e+07	5.04378e+07	6.57543e+07	1.66318e+07	7.03966e+07	2.58966e+07	1.07223e+07	6.38486e+07	3.98523e+07	5.70331e+07	4.4554e+07	4.06063e+07	3.56041e+07	5.96572e+07	4.54884e+07	4.23947e+07	4.46036e+07	4.5919e+07	4.63455e+07
7-(1-hydroxy-1-methyl-ethyl)-1,4a-dimethyl-2,3,4,9,10,10a-hexahydrophenanthrene-1-carboxylic acid	3.95	level1			315.197	254.3	NEG	7.87444e+06	8.0698e+06	8.24831e+06	9.07709e+06	8.77144e+06	8.73127e+06	7.5419e+06	1.16197e+07	8.4758e+06	9.20655e+06	7.22993e+06	7.47274e+06	1.25901e+07	1.43607e+07	1.74559e+07	1.22529e+07	1.27776e+07	1.56019e+07	1.36593e+07	1.49395e+07	1.53001e+07	1.40834e+07	1.61797e+07	1.38198e+07	1.127e+07	1.1747e+07	1.08699e+07	1.09534e+07
1-Deoxypebrolide	3.95	level1			415.211	250.7	POS	5.93549e+07	4.95425e+07	5.89972e+07	7.27589e+07	6.07237e+07	4.70313e+07	6.27013e+07	5.53045e+07	4.9651e+07	4.91861e+07	4.83045e+07	5.80553e+07	4.67127e+07	4.96619e+07	4.94626e+07	5.2389e+07	4.28236e+07	7.44195e+07	4.90597e+07	5.09105e+07	5.50971e+07	4.63475e+07	2.55472e+08	7.06267e+07	6.14755e+07	6.44082e+07	6.46023e+07	6.29708e+07
1-(1H-indol-3-yl)ethanone	3.95	level1			160.076	196.3	POS	3.6703e+06	4.53269e+06	4.66069e+06	4.98699e+06	4.75734e+06	3.4621e+06	4.94621e+06	5.18264e+06	5.03726e+06	5.40743e+06	4.55129e+06	4.77534e+06	3.85506e+06	3.35258e+06	3.01103e+06	4.14702e+06	3.17721e+06	3.59876e+06	3.69312e+06	4.57857e+06	4.5671e+06	4.37581e+06	3.76176e+06	4.58262e+06	3.94222e+06	4.31025e+06	4.29401e+06	4.34499e+06
Narcissin	3.95	level1			623.162	187.6	NEG	2.18088e+06	1.20622e+06	1.08145e+06	850742	1.56302e+06	2.17715e+06	1.0892e+06	696679	773970	1.02388e+06	326288	777140	3.11673e+06	2.46739e+06	2.36925e+06	1.81562e+06	2.12784e+06	1.6248e+06	1.51193e+06	1.24294e+06	767483	1.02166e+06	1.63421e+06	1.47956e+06	1.21961e+06	1.61917e+06	1.38381e+06	1.74923e+06
Euscaphic acid	3.94	level1			487.342	260.3	NEG	2.41157e+07	1.54108e+07	2.52636e+07	1.49656e+07	2.13261e+07	1.73748e+07	3.87366e+07	3.07495e+07	3.69217e+07	2.98952e+07	3.00548e+07	4.0119e+07	1.01171e+07	3.07524e+07	1.39863e+07	7.46836e+06	2.7141e+07	1.66465e+07	2.7425e+07	2.19235e+07	1.81962e+07	1.9973e+07	2.57601e+07	2.12734e+07	2.35855e+07	2.33457e+07	2.37625e+07	2.43776e+07
10,11-dihydroxy-9-(hydroxymethyl)-1,2,6a,6b,9,12a-hexamethyl-2,3,4,5,6,6a,7,8,8a,10,11,12,13,14b-tetradecahydro-1H-picene-4a-carboxylic acid	3.94	level1			487.342	260.3	NEG	2.41157e+07	1.54108e+07	2.52636e+07	1.49656e+07	2.13261e+07	1.73748e+07	3.87366e+07	3.07495e+07	3.69217e+07	2.98952e+07	3.00548e+07	4.0119e+07	1.01171e+07	3.07524e+07	1.39863e+07	7.46836e+06	2.7141e+07	1.66465e+07	2.7425e+07	2.19235e+07	1.81962e+07	1.9973e+07	2.57601e+07	2.12734e+07	2.35855e+07	2.33457e+07	2.37625e+07	2.43776e+07
(4aS,6aS,6bR,9R,10R,11R,12aR)-10,11-dihydroxy-9-(hydroxymethyl)-2,2,6a,6b,9,12a-hexamethyl-1,3,4,5,6,6a,7,8,8a,10,11,12,13,14b-tetradecahydropicene-4a-carboxylic acid	3.94	level1			487.342	260.3	NEG	2.41157e+07	1.54108e+07	2.52636e+07	1.49656e+07	2.13261e+07	1.73748e+07	3.87366e+07	3.07495e+07	3.69217e+07	2.98952e+07	3.00548e+07	4.0119e+07	1.01171e+07	3.07524e+07	1.39863e+07	7.46836e+06	2.7141e+07	1.66465e+07	2.7425e+07	2.19235e+07	1.81962e+07	1.9973e+07	2.57601e+07	2.12734e+07	2.35855e+07	2.33457e+07	2.37625e+07	2.43776e+07
(1S,2R,4aS,6aS,6bR,9R,10R,11R,12aR)-10,11-dihydroxy-9-(hydroxymethyl)-1,2,6a,6b,9,12a-hexamethyl-2,3,4,5,6,6a,7,8,8a,10,11,12,13,14b-tetradecahydro-1H-picene-4a-carboxylic acid	3.94	level1			487.342	260.3	NEG	2.41157e+07	1.54108e+07	2.52636e+07	1.49656e+07	2.13261e+07	1.73748e+07	3.87366e+07	3.07495e+07	3.69217e+07	2.98952e+07	3.00548e+07	4.0119e+07	1.01171e+07	3.07524e+07	1.39863e+07	7.46836e+06	2.7141e+07	1.66465e+07	2.7425e+07	2.19235e+07	1.81962e+07	1.9973e+07	2.57601e+07	2.12734e+07	2.35855e+07	2.33457e+07	2.37625e+07	2.43776e+07
(1S,2R,4aS,6aS,6bR,9R,10S,11R,12aR,14bS)-10,11-dihydroxy-9-(hydroxymethyl)-1,2,6a,6b,9,12a-hexamethyl-2,3,4,5,6,6a,7,8,8a,10,11,12,13,14b-tetradecahydro-1H-picene-4a-carboxylic acid	3.94	level1			487.342	260.3	NEG	2.41157e+07	1.54108e+07	2.52636e+07	1.49656e+07	2.13261e+07	1.73748e+07	3.87366e+07	3.07495e+07	3.69217e+07	2.98952e+07	3.00548e+07	4.0119e+07	1.01171e+07	3.07524e+07	1.39863e+07	7.46836e+06	2.7141e+07	1.66465e+07	2.7425e+07	2.19235e+07	1.81962e+07	1.9973e+07	2.57601e+07	2.12734e+07	2.35855e+07	2.33457e+07	2.37625e+07	2.43776e+07
12-Methyltridecanoic acid	3.94	level1			227.201	309.8	NEG	1.67358e+08	1.90914e+08	1.85066e+08	1.97825e+08	1.91372e+08	1.88648e+08	2.14109e+08	1.69656e+08	1.7842e+08	2.01379e+08	2.0142e+08	1.8585e+08	1.7043e+08	1.43939e+08	1.51337e+08	1.32035e+08	1.66261e+08	1.37013e+08	1.69759e+08	1.60492e+08	1.76164e+08	1.62117e+08	1.67693e+08	2.15148e+08	1.60251e+08	1.73497e+08	1.79586e+08	1.81563e+08
Caprylic acid	3.94	level1			143.108	251.7	NEG	9.7823e+06	1.02658e+07	7.21112e+06	9.37836e+06	8.26111e+06	7.74114e+06	9.95391e+06	8.36916e+06	6.90624e+06	8.04729e+06	8.53926e+06	7.84164e+06	9.85515e+06	1.13848e+07	9.20904e+06	9.52703e+06	8.56251e+06	1.08665e+07	9.11632e+06	1.00801e+07	6.77856e+06	1.15034e+07	7.49994e+06	8.02199e+06	4.26071e+06	4.46121e+06	5.97061e+06	6.60657e+06
Glucose	3.94	level1			203.053	9	POS	2.44168e+06	1.65019e+06	2.73173e+06	3.69226e+06	5.1751e+06	1.82313e+06	3.71931e+06	1.90275e+06	1.82802e+06	2.87371e+06	5.32559e+06	1.82255e+06	2.03066e+06	1.61728e+06	3.31277e+06	1.75637e+06	2.74161e+06	4.34418e+06	4.13867e+06	3.15666e+06	4.74463e+06	1.46985e+06	2.41325e+06	4.06652e+06	4.02161e+06	2.56804e+06	2.8712e+06	3.86585e+06
5,7-dihydroxy-2-(4-hydroxy-3-methoxy-phenyl)-3-[3,4,5-trihydroxy-6-[[(2R,3R,4R,5R,6S)-3,4,5-trihydroxy-6-methyl-tetrahydropyran-2-yl]oxymethyl]tetrahydropyran-2-yl]oxy-chromen-4-one	3.94	level1			623.162	187.6	NEG	2.18088e+06	1.20622e+06	1.08145e+06	850742	1.56302e+06	2.17715e+06	1.0892e+06	696679	773970	1.02388e+06	326288	777140	3.11673e+06	2.46739e+06	2.36925e+06	1.81562e+06	2.12784e+06	1.6248e+06	1.51193e+06	1.24294e+06	767483	1.02166e+06	1.63421e+06	1.47956e+06	1.21961e+06	1.61917e+06	1.38381e+06	1.74923e+06
Pentadecanoic acid	3.94	level1			241.217	317.1	NEG	2.60129e+08	2.80268e+08	2.82151e+08	2.94763e+08	3.47885e+08	2.81658e+08	3.37289e+08	2.80151e+08	3.0249e+08	3.32636e+08	3.17744e+08	3.15507e+08	3.17563e+08	2.49725e+08	2.62943e+08	2.07156e+08	2.55225e+08	2.41394e+08	2.66232e+08	3.17532e+08	3.06537e+08	2.88818e+08	3.07936e+08	4.11242e+08	2.59067e+08	3.05599e+08	2.60359e+08	3.06861e+08
alpha-Linolenic acid	3.94	level1			277.216	305.2	NEG	4.9657e+09	5.35194e+09	4.67617e+09	5.19702e+09	4.95274e+09	5.27566e+09	4.58837e+09	3.90218e+09	4.5621e+09	4.35246e+09	4.47337e+09	3.52536e+09	4.78766e+09	4.34883e+09	4.62714e+09	4.3805e+09	3.96146e+09	4.15467e+09	4.26259e+09	4.87344e+09	4.29654e+09	4.53954e+09	4.39398e+09	4.03585e+09	4.48527e+09	4.46579e+09	4.49788e+09	4.65376e+09
gamma-Linolenic acid	3.94	level1			277.216	305.2	NEG	4.9657e+09	5.35194e+09	4.67617e+09	5.19702e+09	4.95274e+09	5.27566e+09	4.58837e+09	3.90218e+09	4.5621e+09	4.35246e+09	4.47337e+09	3.52536e+09	4.78766e+09	4.34883e+09	4.62714e+09	4.3805e+09	3.96146e+09	4.15467e+09	4.26259e+09	4.87344e+09	4.29654e+09	4.53954e+09	4.39398e+09	4.03585e+09	4.48527e+09	4.46579e+09	4.49788e+09	4.65376e+09
Stearidonic acid	3.94	level1			275.202	299.9	NEG	1.73438e+07	1.64333e+07	1.58576e+07	1.62875e+07	1.55336e+07	1.63341e+07	1.73609e+07	1.18635e+07	1.76457e+07	1.30475e+07	1.49648e+07	1.2581e+07	1.3742e+07	1.33857e+07	1.43759e+07	1.36332e+07	1.13757e+07	1.19731e+07	1.35654e+07	1.61467e+07	1.45695e+07	1.53943e+07	1.29415e+07	1.25257e+07	1.39407e+07	1.44769e+07	1.60617e+07	1.42514e+07
LPC(16:0)	3.94	level1			496.34	294	POS	2.52265e+06	2.00333e+06	2.14957e+06	1.74027e+06	2.36441e+06	2.52413e+06	2.53483e+06	904320	1.17959e+06	1.7544e+06	1.61831e+06	2.79832e+06	2.19619e+06	5.29997e+06	2.95882e+06	1.75755e+06	4.27259e+06	3.08209e+06	4.3464e+06	2.70301e+06	2.81274e+06	2.36739e+06	2.80437e+06	2.75239e+06	2.26994e+06	2.1883e+06	2.55125e+06	2.58109e+06
NAE(18:3(9Z,12Z,15Z))	3.94	level1			322.274	288.7	POS	1.49465e+07	1.64498e+07	1.64218e+07	1.75659e+07	1.54032e+07	1.41976e+07	1.3708e+07	1.35821e+07	1.57412e+07	1.30053e+07	1.3737e+07	1.18871e+07	1.62325e+07	1.35446e+07	1.44364e+07	1.49052e+07	1.2411e+07	1.2508e+07	1.10314e+07	1.39229e+07	1.17828e+07	1.19144e+07	1.12399e+07	1.42317e+07	1.35409e+07	1.39589e+07	1.46398e+07	1.37099e+07
Octadecanedioic acid	3.94	level1			313.238	288	NEG	1.9425e+07	1.92183e+07	1.72604e+07	2.40515e+07	1.88896e+07	2.10784e+07	2.44889e+07	2.77845e+07	2.59054e+07	2.97388e+07	2.5102e+07	2.57508e+07	2.40796e+07	2.03794e+07	2.33468e+07	1.94545e+07	2.09941e+07	2.24224e+07	1.95489e+07	2.32024e+07	2.52595e+07	2.07735e+07	2.12566e+07	2.02804e+07	2.20482e+07	2.60705e+07	2.60425e+07	2.60631e+07
(E)-9,12,13-trihydroxyoctadec-10-enoic acid	3.94	level1			329.233	233.3	NEG	1.26768e+08	1.15983e+08	1.16768e+08	1.13809e+08	1.43462e+08	1.43498e+08	1.47107e+08	1.42845e+08	1.23637e+08	1.55759e+08	1.34158e+08	1.5154e+08	1.2437e+08	1.21725e+08	1.1781e+08	1.2785e+08	1.6784e+08	1.43779e+08	1.23646e+08	1.05598e+08	9.28465e+07	8.75916e+07	1.09891e+08	1.16389e+08	1.26063e+08	1.26754e+08	1.29947e+08	1.28353e+08
(Z)-5,8,11-trihydroxyoctadec-9-enoic acid	3.94	level1			329.233	233.3	NEG	1.26768e+08	1.15983e+08	1.16768e+08	1.13809e+08	1.43462e+08	1.43498e+08	1.47107e+08	1.42845e+08	1.23637e+08	1.55759e+08	1.34158e+08	1.5154e+08	1.2437e+08	1.21725e+08	1.1781e+08	1.2785e+08	1.6784e+08	1.43779e+08	1.23646e+08	1.05598e+08	9.28465e+07	8.75916e+07	1.09891e+08	1.16389e+08	1.26063e+08	1.26754e+08	1.29947e+08	1.28353e+08
5-Hydroxyvalproic acid	3.94	level1			159.103	184.3	NEG	1.21705e+07	1.17675e+07	7.81586e+06	1.18976e+07	1.31682e+07	5.38677e+06	9.74466e+06	1.07085e+07	1.19971e+07	1.21421e+07	6.95436e+06	1.20979e+07	9.62354e+06	8.48495e+06	3.81309e+06	9.38548e+06	1.05664e+07	1.04585e+07	1.25407e+07	1.10884e+07	1.15189e+07	1.10044e+07	1.31677e+07	1.24462e+07	1.17218e+07	6.69741e+06	6.00916e+06	1.09267e+07
Acetoacetic acid	3.94	level1			101.024	28.8	NEG	2.04076e+07	1.61719e+07	1.79591e+07	2.03122e+07	7.66844e+07	1.89892e+07	1.97879e+07	1.78845e+07	1.93228e+07	1.74474e+07	1.82295e+07	1.94568e+07	1.81113e+07	1.98302e+07	2.50586e+07	2.03872e+07	1.43833e+07	2.20224e+07	1.98709e+07	2.08246e+07	2.26024e+07	2.18021e+07	2.17442e+07	1.88723e+07	2.44494e+07	2.13052e+07	1.8123e+07	1.67415e+07
Dimethylglycine	3.94	level1			104.07	8.5	POS	8.01826e+06	8.07783e+06	4.60951e+06	8.73362e+06	1.03206e+07	5.90586e+06	5.93363e+06	5.64995e+06	5.73329e+06	5.1194e+06	6.63342e+06	8.4627e+06	5.65159e+06	4.80377e+06	1.0253e+07	4.98736e+06	6.81432e+06	7.75844e+06	7.79212e+06	3.18101e+06	6.64559e+06	5.96294e+06	8.27311e+06	6.29191e+06	1.69688e+07	1.38614e+07	5.55655e+06	4.67761e+06
9-Oxo-10(E),12(E)-octadecadienoic acid	3.94	level1			293.212	292	NEG	2.55322e+09	2.63292e+09	1.83236e+09	2.44815e+09	2.42706e+09	2.0853e+09	1.53356e+09	1.60997e+09	2.452e+09	2.18718e+09	1.10413e+09	2.95733e+09	4.81713e+09	3.55358e+09	4.11414e+09	3.52893e+09	3.24441e+09	3.41475e+09	2.57753e+09	2.79534e+09	3.20473e+09	3.47123e+09	2.51742e+09	2.25305e+09	2.76217e+09	2.69125e+09	2.72814e+09	2.71571e+09
5-[(E)-4-carboxy-3-methyl-but-3-enyl]-1,4a-dimethyl-6-methylene-decalin-1-carboxylic acid	3.94	level1			333.207	275.5	NEG	7.03912e+06	6.12847e+06	4.91848e+06	4.67488e+06	5.48102e+06	5.8471e+06	1.00723e+07	7.3085e+06	5.94002e+06	2.03692e+07	7.27314e+06	6.32194e+06	5.70702e+06	6.52387e+06	7.74611e+06	7.09525e+06	5.66384e+06	7.6853e+06	1.91106e+07	6.71957e+06	6.46012e+06	7.17354e+06	6.60919e+06	5.33371e+06	7.4084e+06	5.97214e+06	7.06166e+06	6.81557e+06
(E)-5-(1,2,4a,5-tetramethyl-7-oxo-3,4,8,8a-tetrahydro-2H-naphthalen-1-yl)-3-methyl-pent-2-enoic acid	3.94	level1			317.212	264.9	NEG	1.8761e+07	1.68613e+07	1.67491e+07	1.61323e+07	2.48293e+07	2.5245e+07	1.59789e+07	2.39014e+07	1.47994e+07	1.72119e+07	1.99698e+07	1.6978e+07	2.18179e+07	1.8102e+07	2.23773e+07	1.99361e+07	2.28449e+07	1.87219e+07	2.30829e+07	2.10563e+07	1.80785e+07	2.11111e+07	2.15936e+07	2.1055e+07	1.99682e+07	1.93716e+07	1.8817e+07	2.06887e+07
13-oxo-7-[3,4,5-trihydroxy-6-(methoxymethyl)tetrahydropyran-2-yl]oxy-tetradecanoic acid	3.94	level1			433.245	206.8	NEG	1.4371e+07	8.04234e+06	2.00927e+07	9.37377e+06	1.10032e+07	1.39807e+07	1.25469e+07	1.46729e+07	9.1062e+06	1.22206e+07	2.03974e+07	1.28312e+07	4.66829e+06	6.30467e+06	8.65396e+06	6.50474e+06	6.07732e+06	7.02716e+06	9.22557e+06	1.00216e+07	1.22232e+07	9.72438e+06	9.55467e+06	8.5977e+06	8.20168e+06	6.20389e+06	6.9229e+06	8.1604e+06
p-Toluquinone	3.94	level1			121.029	196.2	NEG	1.15731e+08	1.14456e+08	8.34214e+07	1.17699e+08	1.245e+08	1.05864e+08	1.05323e+08	1.10127e+08	9.54231e+07	1.11363e+08	7.96335e+07	1.07518e+08	1.40657e+08	1.39125e+08	1.44919e+08	1.7485e+08	1.55309e+08	1.8183e+08	9.0779e+07	9.97565e+07	1.09601e+08	1.08314e+08	9.54249e+07	1.02713e+08	1.23992e+08	1.18498e+08	1.17399e+08	1.19584e+08
(E)-3,10-dihydroxy-4,9-dimethyl-dodec-6-enedioic acid	3.94	level1			287.15	192.9	NEG	2.07421e+09	2.1431e+09	2.18465e+09	2.14028e+09	2.16279e+09	2.0672e+09	2.21379e+09	2.72225e+09	2.15443e+09	2.40027e+09	2.29774e+09	2.2811e+09	2.40764e+09	2.16207e+09	2.17929e+09	2.35407e+09	2.03178e+09	2.17101e+09	2.21177e+09	2.55595e+09	2.55714e+09	2.4658e+09	2.40445e+09	2.40845e+09	2.33373e+09	2.32919e+09	2.33699e+09	2.30328e+09
2-(1H-indol-3-yl)-2-oxo-acetamide	3.94	level1			187.051	190.8	NEG	4.32351e+07	4.32299e+07	4.79749e+07	4.92599e+07	5.3124e+07	4.42635e+07	3.71174e+07	5.97569e+07	3.62818e+07	5.40472e+07	4.17435e+07	5.05172e+07	3.20845e+07	3.1449e+07	3.12375e+07	3.77745e+07	3.47204e+07	3.77016e+07	4.12946e+07	3.80193e+07	4.12975e+07	4.25765e+07	3.58484e+07	4.44839e+07	4.15828e+07	4.10272e+07	4.35908e+07	4.30388e+07
(2E,4E)-5-(3,8-dihydroxy-1,5-dimethyl-7-oxo-6-oxabicyclo[3.2.1]octan-8-yl)-3-methyl-penta-2,4-dienoic acid	3.94	level1			295.119	166.5	NEG	1.53819e+07	1.34059e+07	1.32619e+07	1.4027e+07	1.31689e+07	1.57687e+07	1.68174e+07	1.5356e+07	1.78152e+07	1.50049e+07	1.64112e+07	1.41526e+07	1.14974e+07	1.23068e+07	1.16533e+07	9.90211e+06	9.4576e+06	1.12086e+07	1.2971e+07	1.29593e+07	1.55601e+07	1.32312e+07	1.32668e+07	1.29168e+07	1.36791e+07	1.45204e+07	1.38626e+07	1.47396e+07
gamma-Glutamylphenylalanine	3.94	level1			293.114	113.6	NEG	6.02709e+07	6.00737e+07	3.63531e+07	6.46342e+07	1.17218e+08	5.40532e+07	1.4344e+07	3.07711e+07	1.73932e+07	4.15851e+07	3.12105e+07	2.5374e+07	1.2332e+08	7.68782e+07	9.15725e+07	1.27795e+08	8.85815e+07	1.12128e+08	5.17817e+07	6.55005e+07	5.10243e+07	6.55736e+07	1.95714e+07	7.09817e+07	6.88321e+07	6.11398e+07	6.06435e+07	6.38638e+07
5-Oxo-L-prolyl-L-proline	3.94	level1			225.088	41.9	NEG	1.80657e+07	1.6595e+07	1.37286e+07	1.45125e+07	1.50361e+07	1.48826e+07	1.39345e+07	9.97823e+06	1.08118e+07	1.57861e+07	1.31236e+07	1.62183e+07	1.68121e+07	1.85984e+07	1.50082e+07	1.13329e+07	1.6351e+07	1.74236e+07	1.51253e+07	1.29308e+07	1.54982e+07	9.21631e+06	1.53313e+07	1.336e+07	1.0485e+07	1.45529e+07	1.42021e+07	1.06247e+07
Malic acid	3.94	level1			133.014	26.2	NEG	4.21148e+09	4.45812e+09	3.92103e+09	5.04336e+09	4.29296e+09	4.10645e+09	4.00678e+09	4.45466e+09	4.44758e+09	4.40562e+09	4.10605e+09	3.06441e+09	4.05152e+09	4.63703e+09	4.87805e+09	4.32307e+09	3.43712e+09	3.72992e+09	4.52651e+09	4.9378e+09	4.30516e+09	5.03276e+09	4.52328e+09	4.63535e+09	4.49001e+09	4.36788e+09	4.1765e+09	4.20848e+09
5-hydroxy-2-(4-hydroxyphenyl)-3-[(2S,3R,4S,5S,6R)-3,4,5-trihydroxy-6-(hydroxymethyl)tetrahydropyran-2-yl]oxy-7-[(2S,3R,4R,5R,6S)-3,4,5-trihydroxy-6-methyl-tetrahydropyran-2-yl]oxy-chromen-4-one	3.93	level1			595.165	189.3	POS	1.04368e+07	1.03381e+07	5.68612e+06	6.38619e+06	1.04761e+07	1.29536e+07	1.43426e+07	8.1068e+06	1.65783e+07	1.1602e+07	9.16447e+06	9.37881e+06	2.64385e+07	2.72895e+07	2.69724e+07	2.28904e+07	2.38317e+07	1.78227e+07	9.9221e+06	1.05702e+07	8.0247e+06	8.87485e+06	1.32094e+07	1.22586e+07	1.42173e+07	1.41117e+07	1.45699e+07	1.44002e+07
8-[4,5-dihydroxy-6-(hydroxymethyl)-3-[3,4,5-trihydroxy-6-(hydroxymethyl)tetrahydropyran-2-yl]oxy-tetrahydropyran-2-yl]-5,7-dihydroxy-2-(4-hydroxyphenyl)chromen-4-one	3.93	level1			595.165	189.3	POS	1.04368e+07	1.03381e+07	5.68612e+06	6.38619e+06	1.04761e+07	1.29536e+07	1.43426e+07	8.1068e+06	1.65783e+07	1.1602e+07	9.16447e+06	9.37881e+06	2.64385e+07	2.72895e+07	2.69724e+07	2.28904e+07	2.38317e+07	1.78227e+07	9.9221e+06	1.05702e+07	8.0247e+06	8.87485e+06	1.32094e+07	1.22586e+07	1.42173e+07	1.41117e+07	1.45699e+07	1.44002e+07
(4aS,6aS,6bR,9R,10S,11R,12aR)-10,11-dihydroxy-9-(hydroxymethyl)-2,2,6a,6b,9,12a-hexamethyl-1,3,4,5,6,6a,7,8,8a,10,11,12,13,14b-tetradecahydropicene-4a-carboxylic acid	3.93	level1			487.342	260.3	NEG	2.41157e+07	1.54108e+07	2.52636e+07	1.49656e+07	2.13261e+07	1.73748e+07	3.87366e+07	3.07495e+07	3.69217e+07	2.98952e+07	3.00548e+07	4.0119e+07	1.01171e+07	3.07524e+07	1.39863e+07	7.46836e+06	2.7141e+07	1.66465e+07	2.7425e+07	2.19235e+07	1.81962e+07	1.9973e+07	2.57601e+07	2.12734e+07	2.35855e+07	2.33457e+07	2.37625e+07	2.43776e+07
Pratensein	3.93	level1			301.07	223.7	POS	6.58346e+06	7.14584e+06	8.53002e+06	8.28505e+06	7.32436e+06	8.22046e+06	2.22106e+07	8.12902e+06	1.73994e+07	2.41647e+07	3.31426e+07	1.06675e+07	8.63981e+06	7.29013e+06	7.9354e+06	7.27641e+06	6.47791e+06	6.45614e+06	5.03586e+06	7.2218e+06	6.47884e+06	5.05361e+06	5.81646e+06	5.22035e+06	1.06186e+07	1.0556e+07	1.05331e+07	1.09472e+07
2'-O-Methyladenosine	3.93	level1			282.12	104.6	POS	3.5706e+06	5.06623e+06	7.02015e+06	2.11027e+07	1.42225e+07	1.1286e+07	8.72766e+06	1.18303e+07	1.04968e+07	1.43819e+07	1.01429e+07	6.90608e+06	2.03104e+07	1.72166e+07	1.7879e+07	1.84225e+07	8.25191e+06	1.04658e+07	1.10684e+07	1.56095e+07	3.94123e+06	5.3043e+06	1.27305e+07	1.1705e+07	1.40851e+07	5.82479e+06	1.16083e+07	1.3383e+07
Citraconic acid	3.93	level1			129.019	41.9	NEG	2.24416e+07	4.82803e+07	1.39213e+07	1.67159e+07	2.03484e+07	2.87429e+07	4.32796e+07	1.65422e+07	4.66092e+07	1.43357e+07	3.53533e+07	2.92083e+07	5.00616e+07	6.03604e+07	6.06735e+07	6.38379e+07	4.34839e+07	5.72402e+07	4.9361e+07	5.33763e+07	6.05721e+07	5.9332e+07	4.99231e+07	5.03762e+07	5.15358e+07	4.73903e+07	3.80343e+07	3.28886e+07
1-Naphthol	3.93	level1			143.05	227.3	NEG	1.2094e+07	1.60328e+07	1.53917e+07	2.05956e+07	2.10909e+07	1.67656e+07	1.46206e+07	1.21543e+07	1.46206e+07	1.67671e+07	1.32181e+07	1.64924e+07	1.00766e+07	1.12509e+07	1.58751e+07	1.1362e+07	1.59094e+07	1.72905e+07	1.38205e+07	2.14706e+07	1.23242e+07	1.73605e+07	9.87573e+06	1.81218e+07	1.50988e+07	1.494e+07	1.57919e+07	1.56866e+07
(Z)-9,12,13-trihydroxyoctadec-15-enoic acid	3.93	level1			329.233	233.3	NEG	1.26768e+08	1.15983e+08	1.16768e+08	1.13809e+08	1.43462e+08	1.43498e+08	1.47107e+08	1.42845e+08	1.23637e+08	1.55759e+08	1.34158e+08	1.5154e+08	1.2437e+08	1.21725e+08	1.1781e+08	1.2785e+08	1.6784e+08	1.43779e+08	1.23646e+08	1.05598e+08	9.28465e+07	8.75916e+07	1.09891e+08	1.16389e+08	1.26063e+08	1.26754e+08	1.29947e+08	1.28353e+08
cis-11.14-Eicosadienoic acid	3.93	level1			307.264	326.4	NEG	4.32511e+06	5.27767e+06	4.23638e+06	5.09351e+06	4.7159e+06	5.29011e+06	4.61113e+06	4.49534e+06	4.35945e+06	4.52958e+06	4.74743e+06	4.6809e+06	6.96984e+06	4.75572e+06	4.85164e+06	5.02969e+06	4.465e+06	3.73825e+06	4.38047e+06	4.79156e+06	4.65401e+06	5.00868e+06	4.68436e+06	6.49179e+06	4.78707e+06	4.69072e+06	4.128e+06	4.91745e+06
Linoleic acid	3.93	level1			279.232	314.4	NEG	1.48599e+09	1.58417e+09	1.46304e+09	1.47679e+09	1.48722e+09	1.67322e+09	1.55176e+09	1.34964e+09	1.42024e+09	1.44586e+09	1.4776e+09	1.58447e+09	1.713e+09	1.73216e+09	1.77833e+09	1.38729e+09	1.4458e+09	1.38082e+09	1.40246e+09	1.53012e+09	1.34097e+09	1.45241e+09	1.42284e+09	1.42095e+09	1.34437e+09	1.50243e+09	1.46109e+09	1.6377e+09
NAE(16:0)	3.93	level1			300.29	307.2	POS	2.16905e+07	3.0738e+07	1.91783e+07	2.26332e+07	2.21951e+07	2.03635e+07	1.9951e+07	2.42862e+07	2.07913e+07	2.24006e+07	2.07582e+07	1.87487e+07	6.31346e+07	1.92837e+07	1.79149e+07	1.96775e+07	1.98252e+07	2.01745e+07	1.71781e+07	1.80632e+07	1.68318e+07	1.80661e+07	1.4528e+07	1.71536e+07	2.07449e+07	2.30981e+07	2.3106e+07	2.31834e+07
2-hydroxydodecanoic acid	3.93	level1			215.165	274.8	NEG	4.02061e+06	4.1575e+06	1.33427e+06	4.68759e+06	4.16488e+06	2.3984e+06	6.15643e+06	4.3502e+06	9.77672e+06	6.95996e+06	1.74714e+06	1.50744e+07	1.95077e+07	1.39959e+07	1.58383e+07	1.7409e+07	1.38712e+07	1.26682e+07	8.45624e+06	5.83768e+06	7.0746e+06	1.09066e+07	6.33178e+06	7.21966e+06	8.4111e+06	6.78476e+06	6.90138e+06	9.06281e+06
(S)-Abscisic acid	3.93	level1			263.129	201.9	NEG	6.07029e+07	6.50418e+07	3.67396e+07	5.28293e+07	2.85467e+07	5.46231e+07	3.46265e+07	4.00599e+07	3.20331e+07	3.87085e+07	3.9595e+07	3.6875e+07	1.91734e+07	1.913e+07	2.21312e+07	3.40826e+07	1.65719e+07	1.66284e+07	2.77266e+07	4.37078e+07	2.83201e+07	5.44538e+07	2.90681e+07	3.04607e+07	2.84336e+07	5.95772e+07	2.78371e+07	6.06131e+07
Indole-3-acetamide	3.93	level1			173.072	169.7	NEG	1.32886e+07	1.29495e+07	1.12019e+07	1.23711e+07	1.38571e+07	1.19826e+07	1.07636e+07	1.45928e+07	8.54359e+06	1.49208e+07	8.87023e+06	1.19042e+07	1.12968e+07	9.96664e+06	1.23805e+07	1.14572e+07	1.46037e+07	1.78031e+07	1.28961e+07	1.39431e+07	1.37339e+07	1.30598e+07	1.16916e+07	1.28232e+07	1.20298e+07	1.29018e+07	1.32046e+07	1.36321e+07
2-Hydroxymethyl benzoic acid	3.93	level1			151.04	167.1	NEG	2.31364e+08	2.42315e+08	2.73217e+08	2.63397e+08	2.35319e+08	2.04656e+08	1.87903e+08	2.4846e+08	1.89439e+08	2.07411e+08	2.13917e+08	2.13307e+08	1.62534e+08	1.81564e+08	1.67635e+08	1.84674e+08	1.46382e+08	1.71472e+08	2.03481e+08	2.39863e+08	2.2282e+08	1.76976e+08	1.55897e+08	2.05158e+08	2.21195e+08	2.11881e+08	2.05032e+08	2.05806e+08
Kynurenic acid	3.93	level1			188.035	143.4	NEG	2.79161e+08	2.64604e+08	2.55864e+08	2.841e+08	2.60396e+08	2.8532e+08	3.56026e+08	3.8219e+08	3.48016e+08	3.14971e+08	3.05499e+08	3.77341e+08	1.94161e+08	2.38169e+08	2.35227e+08	2.38883e+08	1.99372e+08	2.0479e+08	2.47044e+08	3.10026e+08	3.6587e+08	3.09504e+08	2.54358e+08	2.73392e+08	3.19847e+08	2.98607e+08	2.78034e+08	2.81116e+08
3,5-Dihydroxybenzoic acid	3.93	level1			153.019	58.5	NEG	1.77133e+07	1.56596e+07	2.79666e+07	2.71579e+07	1.27537e+07	1.30804e+07	1.0845e+07	1.23475e+07	7.18932e+06	9.35689e+06	1.20309e+07	1.06007e+07	1.2091e+07	1.09901e+07	1.14637e+07	1.41349e+07	1.07533e+07	1.15271e+07	2.29781e+07	2.99458e+07	1.63231e+07	1.94971e+07	1.59553e+07	1.72805e+07	1.28911e+07	1.44506e+07	1.40566e+07	1.1933e+07
2-Hydroxy-2-methylbutyric acid	3.93	level1			117.056	49.8	NEG	8.22107e+07	2.25922e+07	2.8851e+07	2.17882e+07	2.43475e+07	7.87739e+07	2.86036e+07	3.17299e+07	5.32714e+07	9.99167e+07	9.29308e+07	1.05118e+08	6.32241e+07	8.75677e+07	8.61931e+07	5.5595e+07	5.45445e+07	9.63011e+07	4.91303e+07	7.79759e+07	3.59347e+07	7.7999e+07	5.77376e+07	8.88131e+07	3.19901e+07	9.11012e+07	9.03787e+07	5.05074e+07
Nicotinate	3.93	level1			122.025	28.2	NEG	4.36825e+07	3.96092e+07	3.99477e+07	2.45176e+07	2.29579e+07	2.66733e+07	3.35891e+07	3.23715e+07	3.34162e+07	4.37418e+07	4.40535e+07	4.71649e+07	6.15928e+07	5.96049e+07	4.46053e+07	4.06522e+07	5.09116e+07	6.10363e+07	3.71275e+07	3.9292e+07	3.88982e+07	3.7059e+07	5.44616e+07	4.90636e+07	3.30924e+07	3.5301e+07	3.07662e+07	3.26164e+07
3beta-Hydroxy-5-cholestenoic acid (3-HCOA)	3.93	level1			415.322	307.2	NEG	1.04128e+07	8.55308e+06	6.64076e+06	1.11279e+07	9.14228e+06	9.09096e+06	1.09898e+07	8.85348e+06	1.25651e+07	9.74166e+06	1.1867e+07	7.71515e+06	6.23036e+06	7.75273e+06	7.52059e+06	7.47494e+06	5.97038e+06	6.98375e+06	8.1574e+06	9.1821e+06	1.08025e+07	1.10235e+07	1.04135e+07	8.21161e+06	8.05653e+06	9.11498e+06	1.00319e+07	1.01922e+07
(10E,12E)-9-hydroxyoctadeca-10,12-dienoic acid	3.93	level1			295.227	279.4	NEG	4.60724e+08	4.49941e+08	4.12667e+08	4.39162e+08	4.76467e+08	4.96577e+08	4.73742e+08	4.74297e+08	4.29372e+08	4.88791e+08	4.27782e+08	4.9167e+08	3.81765e+08	4.16867e+08	4.40559e+08	4.5217e+08	4.46971e+08	4.46465e+08	3.22446e+08	3.78458e+08	3.24868e+08	2.91021e+08	3.43297e+08	3.20371e+08	4.28836e+08	4.32505e+08	4.29788e+08	4.33071e+08
Unk-DL-Val-DL-OVal-DL-Leu-OH	3.93	level1			443.277	263.6	NEG	420764	0	182758	0	0	768427	0	237226	0	205176	139761	1.01601e+06	7.81554e+06	119178	4.71914e+06	604675	4.73025e+06	464272	287499	422455	2.0893e+06	220923	0	2.85934e+07	1.59659e+06	1.96683e+06	1.56769e+06	1.809e+06
8-hydroxy-6-methyl-2-(4-methylpent-3-enyl)octa-2,6-dienoic acid	3.93	level1			251.166	244.5	NEG	3.02952e+07	2.64561e+07	1.58095e+07	2.12582e+07	2.14403e+07	2.2591e+07	3.13162e+07	1.98723e+07	3.61394e+07	2.63203e+07	2.46648e+07	3.24268e+07	2.08127e+07	2.20149e+07	2.18191e+07	2.41805e+07	2.31282e+07	3.57756e+07	2.78645e+07	1.75063e+07	2.37868e+07	1.87891e+07	2.71109e+07	2.49931e+07	3.29772e+07	2.47538e+07	3.15322e+07	2.43913e+07
(-)-Camphoric acid	3.93	level1			199.097	207.5	NEG	1.76753e+08	1.84156e+08	1.87231e+08	1.79653e+08	1.83147e+08	1.74778e+08	1.95713e+08	2.13108e+08	1.96133e+08	2.00098e+08	1.81482e+08	1.68923e+08	1.8075e+08	1.61646e+08	1.68747e+08	1.72946e+08	1.54307e+08	1.58162e+08	1.81262e+08	1.98897e+08	2.20686e+08	2.1035e+08	2.21717e+08	1.92397e+08	1.91085e+08	1.86369e+08	1.90105e+08	1.83641e+08
Pinoresinol	3.93	level1			357.135	197.5	NEG	2.84593e+06	3.69442e+06	5.33138e+06	3.22422e+06	4.12029e+06	3.07077e+06	5.35019e+06	4.47301e+06	5.38561e+06	3.61902e+06	6.26415e+06	3.42375e+06	1.6352e+06	1.80963e+06	8.75685e+06	0	728570	649252	0	1.14434e+06	1.93687e+06	1.56805e+06	978339	1.72894e+06	2.01003e+06	2.8636e+06	2.22072e+06	2.96177e+06
2-formamido-3-(1H-indol-3-yl)propanoic acid	3.93	level1			231.077	174.4	NEG	5.77733e+07	7.43099e+07	6.62964e+07	6.90473e+07	7.00471e+07	5.46862e+07	5.11674e+07	7.50424e+07	5.83567e+07	6.58089e+07	5.10345e+07	6.43743e+07	4.55283e+07	5.29549e+07	4.4395e+07	4.92159e+07	4.20841e+07	5.54261e+07	5.92466e+07	6.9021e+07	6.68675e+07	6.59211e+07	4.68877e+07	6.81543e+07	6.43701e+07	5.73576e+07	6.16972e+07	5.9641e+07
2-Hydroxy-3-methylquinoxaline	3.93	level1			161.071	166.2	POS	3.60244e+07	2.87638e+07	2.45317e+07	2.57407e+07	3.72499e+07	2.90043e+07	2.40494e+07	2.28792e+07	2.79953e+07	2.56374e+07	2.507e+07	2.84891e+07	2.85202e+07	2.96814e+07	2.77615e+07	2.97598e+07	2.71856e+07	3.21829e+07	3.34922e+07	2.9345e+07	3.18444e+07	4.0995e+07	2.83284e+07	3.23902e+07	2.64052e+07	2.68516e+07	2.85956e+07	2.6478e+07
N-[2-(4-hydroxyphenyl)ethyl]acetamide	3.93	level1			180.102	153.8	POS	5.67725e+06	5.78267e+06	8.04853e+06	5.11287e+06	6.05198e+06	6.17611e+06	6.6094e+06	7.27437e+06	8.15388e+06	6.70752e+06	6.43166e+06	6.62459e+06	8.66755e+06	7.68306e+06	7.77652e+06	9.38376e+06	8.048e+06	1.0398e+07	5.03855e+06	6.67579e+06	6.31448e+06	6.32661e+06	7.51491e+06	5.42925e+06	6.81414e+06	5.2576e+06	6.69362e+06	6.34816e+06
gamma-Glutamylvaline	3.93	level1			245.114	28.7	NEG	8.72441e+06	1.02902e+07	7.80744e+06	8.95936e+06	9.75877e+06	8.34923e+06	5.77301e+06	7.51978e+06	6.16803e+06	8.50744e+06	6.55813e+06	6.3753e+06	6.77631e+06	5.12918e+06	6.33721e+06	6.33698e+06	5.32872e+06	5.63727e+06	6.57067e+06	7.4784e+06	6.6608e+06	6.82642e+06	5.36539e+06	6.56813e+06	7.50462e+06	7.25869e+06	7.3962e+06	7.21859e+06
(1R,2R,4aS,6aS,6bR,10S,11R,12aR)-1,10,11-trihydroxy-1,2,6a,6b,9,9,12a-heptamethyl-2,3,4,5,6,6a,7,8,8a,10,11,12,13,14b-tetradecahydropicene-4a-carboxylic acid	3.92	level1			487.342	260.3	NEG	2.41157e+07	1.54108e+07	2.52636e+07	1.49656e+07	2.13261e+07	1.73748e+07	3.87366e+07	3.07495e+07	3.69217e+07	2.98952e+07	3.00548e+07	4.0119e+07	1.01171e+07	3.07524e+07	1.39863e+07	7.46836e+06	2.7141e+07	1.66465e+07	2.7425e+07	2.19235e+07	1.81962e+07	1.9973e+07	2.57601e+07	2.12734e+07	2.35855e+07	2.33457e+07	2.37625e+07	2.43776e+07
(2S)-2-benzamido-3-phenyl-propanoic acid	3.92	level1			268.098	215.3	NEG	1.66974e+07	1.72261e+07	1.60423e+07	1.44477e+07	1.55441e+07	1.77513e+07	8.04238e+06	1.28017e+07	4.52347e+06	1.60266e+07	1.56429e+07	1.25119e+07	1.84079e+07	2.19954e+07	2.0912e+07	2.80629e+07	1.81436e+07	2.37423e+07	2.05053e+07	2.79615e+07	2.46987e+07	1.96548e+07	1.39781e+07	2.18453e+07	1.90823e+07	1.88059e+07	1.76188e+07	1.88758e+07
Pehanorm	3.92	level1			104.07	8.5	POS	8.01826e+06	8.07783e+06	4.60951e+06	8.73362e+06	1.03206e+07	5.90586e+06	5.93363e+06	5.64995e+06	5.73329e+06	5.1194e+06	6.63342e+06	8.4627e+06	5.65159e+06	4.80377e+06	1.0253e+07	4.98736e+06	6.81432e+06	7.75844e+06	7.79212e+06	3.18101e+06	6.64559e+06	5.96294e+06	8.27311e+06	6.29191e+06	1.69688e+07	1.38614e+07	5.55655e+06	4.67761e+06
(Z)-5-(1,2,4a,5-tetramethyl-7-oxo-3,4,8,8a-tetrahydro-2H-naphthalen-1-yl)-3-methyl-pent-2-enoic acid	3.92	level1			317.212	264.9	NEG	1.8761e+07	1.68613e+07	1.67491e+07	1.61323e+07	2.48293e+07	2.5245e+07	1.59789e+07	2.39014e+07	1.47994e+07	1.72119e+07	1.99698e+07	1.6978e+07	2.18179e+07	1.8102e+07	2.23773e+07	1.99361e+07	2.28449e+07	1.87219e+07	2.30829e+07	2.10563e+07	1.80785e+07	2.11111e+07	2.15936e+07	2.1055e+07	1.99682e+07	1.93716e+07	1.8817e+07	2.06887e+07
2-Methylquinazolin-4-ol	3.92	level1			161.071	166.2	POS	3.60244e+07	2.87638e+07	2.45317e+07	2.57407e+07	3.72499e+07	2.90043e+07	2.40494e+07	2.28792e+07	2.79953e+07	2.56374e+07	2.507e+07	2.84891e+07	2.85202e+07	2.96814e+07	2.77615e+07	2.97598e+07	2.71856e+07	3.21829e+07	3.34922e+07	2.9345e+07	3.18444e+07	4.0995e+07	2.83284e+07	3.23902e+07	2.64052e+07	2.68516e+07	2.85956e+07	2.6478e+07
Traumatic acid	3.92	level1			227.129	230.6	NEG	4.19567e+07	4.85334e+07	4.36902e+07	4.67589e+07	4.59605e+07	4.82073e+07	4.25632e+07	5.17173e+07	3.98117e+07	6.14589e+07	4.48899e+07	3.97917e+07	4.3863e+07	3.77204e+07	4.09339e+07	4.64663e+07	6.71595e+07	4.19526e+07	3.55301e+07	4.26896e+07	4.13812e+07	5.76084e+07	3.95118e+07	5.35022e+07	4.52342e+07	6.32018e+07	4.4132e+07	6.38169e+07
Phenylacetylglutamine	3.92	level1			263.103	143.4	NEG	7.52715e+06	1.22108e+07	8.6835e+06	1.18819e+07	1.0659e+07	7.38586e+06	9.03294e+06	1.12357e+07	7.45904e+06	8.53581e+06	9.01649e+06	9.93213e+06	2.6015e+06	1.3971e+07	1.49989e+07	2.10423e+07	2.24802e+06	3.00786e+06	7.62583e+06	7.41284e+06	5.83899e+06	1.14056e+07	8.03497e+06	1.01207e+07	9.45627e+06	1.04403e+07	1.26114e+07	7.86791e+06
Antipyrine (Phenazone)	3.92	level1			189.102	131.2	POS	5.5631e+08	3.91501e+08	4.07874e+08	4.32225e+08	5.63984e+08	4.66372e+08	5.52145e+08	4.75084e+08	5.85099e+08	4.19577e+08	4.62992e+08	4.28457e+08	3.15804e+08	3.98033e+08	4.00778e+08	3.80937e+08	3.0979e+08	3.42257e+08	5.23847e+08	5.20279e+08	7.36097e+08	6.87191e+08	5.03684e+08	5.40156e+08	4.52329e+08	4.4008e+08	4.5961e+08	5.41883e+08
Myosmine	3.92	level1			147.092	45.1	POS	2.02508e+08	2.00921e+08	1.47809e+08	1.63234e+08	1.58185e+08	1.94066e+08	1.42375e+08	1.28921e+08	1.67285e+08	1.41774e+08	1.38536e+08	1.56898e+08	7.67082e+08	6.12645e+08	7.55291e+08	8.49953e+08	5.9715e+08	7.47776e+08	2.41036e+08	2.94775e+08	3.23523e+08	3.71247e+08	3.29964e+08	2.2954e+08	3.20965e+08	3.36201e+08	3.21427e+08	3.23638e+08
Phenylalanine	3.92	level1			166.086	42.8	POS	6.06894e+08	6.93176e+08	5.77873e+08	6.90877e+08	7.90602e+08	5.44263e+08	2.27637e+08	5.14105e+08	2.27184e+08	5.67664e+08	3.13579e+08	3.13759e+08	1.06628e+09	8.34452e+08	8.28769e+08	1.15174e+09	1.1167e+09	1.09165e+09	5.58528e+08	7.03661e+08	6.33187e+08	5.05428e+08	3.91257e+08	7.2729e+08	6.51637e+08	6.93295e+08	7.12268e+08	6.40432e+08
LPA(18:0)	3.92	level1			437.267	348.9	NEG	1.91304e+07	1.87363e+07	1.69983e+07	1.65381e+07	1.6653e+07	1.79662e+07	1.68125e+07	1.92643e+07	1.52838e+07	1.91662e+07	1.61881e+07	1.79749e+07	2.47531e+07	1.96503e+07	1.99545e+07	1.90624e+07	2.07465e+07	1.81173e+07	1.77446e+07	2.19769e+07	2.02547e+07	1.6617e+07	1.94002e+07	1.7682e+07	1.78181e+07	1.77045e+07	1.93697e+07	1.90716e+07
3-(1,2-dihydroxypropyl)-1,6,8-trihydroxy-anthracene-9,10-dione	3.92	level1			329.066	220.7	NEG	9.75614e+07	9.20413e+07	1.07813e+08	9.42648e+07	9.78682e+07	1.08548e+08	1.30109e+08	1.07156e+08	1.03487e+08	1.35505e+08	1.57087e+08	1.2303e+08	1.2383e+08	1.19785e+08	1.17994e+08	1.25492e+08	1.18319e+08	1.26514e+08	1.01371e+08	1.49941e+08	1.48396e+08	9.78891e+07	1.20554e+08	1.10201e+08	1.12899e+08	1.17489e+08	1.19703e+08	1.21272e+08
Guvacine	3.92	level1			128.071	15.9	POS	9.80213e+06	7.16974e+06	7.24321e+06	9.52854e+06	9.60027e+06	7.36977e+06	7.59385e+06	6.12824e+06	7.36805e+06	6.90971e+06	6.48111e+06	7.22171e+06	6.44784e+06	7.00616e+06	9.45335e+06	7.31208e+06	7.19892e+06	9.82203e+06	7.37722e+06	7.92013e+06	8.96026e+06	7.47369e+06	9.60323e+06	6.75337e+06	1.05713e+07	8.28371e+06	6.28278e+06	6.14776e+06
(4aR,5R,6aR,6aS,6bR,8aR,9R,10S,12aR,14bS)-5,10-dihydroxy-9-(hydroxymethyl)-2,2,6a,6b,9,12a-hexamethyl-1,3,4,5,6,6a,7,8,8a,10,11,12,13,14b-tetradecahydropicene-4a-carboxylic acid	3.91	level1			487.342	260.3	NEG	2.41157e+07	1.54108e+07	2.52636e+07	1.49656e+07	2.13261e+07	1.73748e+07	3.87366e+07	3.07495e+07	3.69217e+07	2.98952e+07	3.00548e+07	4.0119e+07	1.01171e+07	3.07524e+07	1.39863e+07	7.46836e+06	2.7141e+07	1.66465e+07	2.7425e+07	2.19235e+07	1.81962e+07	1.9973e+07	2.57601e+07	2.12734e+07	2.35855e+07	2.33457e+07	2.37625e+07	2.43776e+07
(1S,4aR,6aS,6bR,10R,11R,12aR,14bS)-1,10,11-trihydroxy-2,2,6a,6b,9,9,12a-heptamethyl-1,3,4,5,6,6a,7,8,8a,10,11,12,13,14b-tetradecahydropicene-4a-carboxylic acid	3.91	level1			487.342	260.3	NEG	2.41157e+07	1.54108e+07	2.52636e+07	1.49656e+07	2.13261e+07	1.73748e+07	3.87366e+07	3.07495e+07	3.69217e+07	2.98952e+07	3.00548e+07	4.0119e+07	1.01171e+07	3.07524e+07	1.39863e+07	7.46836e+06	2.7141e+07	1.66465e+07	2.7425e+07	2.19235e+07	1.81962e+07	1.9973e+07	2.57601e+07	2.12734e+07	2.35855e+07	2.33457e+07	2.37625e+07	2.43776e+07
Prostaglandin B2 (PGB2)	3.91	level1			333.208	253.3	NEG	1.49929e+07	5.06007e+07	1.6042e+07	4.68798e+07	5.23892e+07	1.52856e+07	1.5507e+07	5.96872e+07	1.35641e+07	1.66837e+07	2.06392e+07	1.58823e+07	1.36129e+07	1.0904e+07	3.74902e+07	1.38362e+07	3.29448e+07	3.17458e+07	1.40608e+07	1.30799e+07	1.21535e+07	3.44538e+07	1.5258e+07	5.3366e+07	1.34433e+07	1.45137e+07	1.66233e+07	1.42876e+07
2-[2-[(Z)-3-(hydroxymethyl)-7-oxooct-3-enyl]-3-(2-hydroxypropan-2-yl)-1-methylcyclopentyl]acetic acid	3.91	level1			353.233	210.1	NEG	1.03479e+08	9.03368e+07	1.12298e+08	8.84174e+07	9.41956e+07	1.28866e+08	1.41838e+08	1.25184e+08	1.53725e+07	1.1387e+08	1.41006e+08	2.37048e+07	8.636e+07	8.57241e+07	7.78118e+07	8.00482e+07	8.46767e+07	8.1631e+07	1.07211e+08	1.07673e+08	1.17863e+08	9.54519e+07	1.1785e+08	1.00674e+08	9.90305e+07	1.04802e+08	1.01784e+08	1.07568e+08
(E)-3-(4-hydroxy-3-methoxy-phenyl)prop-2-enamide	3.91	level1			176.071	161	POS	2.75527e+07	2.35164e+07	1.8085e+07	2.97997e+07	3.18375e+07	2.92871e+07	3.62436e+07	3.1417e+07	4.32158e+07	3.13553e+07	2.52113e+07	3.0296e+07	2.42943e+07	2.7698e+07	3.08377e+07	2.64194e+07	2.60341e+07	2.45402e+07	3.52679e+07	4.04578e+07	6.34581e+07	4.63816e+07	4.25694e+07	3.44212e+07	3.30128e+07	3.3581e+07	3.28344e+07	3.39436e+07
2-Methylglutaric acid	3.91	level1			145.05	95.6	NEG	3.99622e+07	3.19793e+07	7.42955e+07	3.84423e+07	3.59381e+07	6.82379e+07	3.64074e+07	8.77227e+07	3.24604e+07	4.53333e+07	4.33194e+07	7.93094e+07	4.66031e+07	7.23333e+07	4.16772e+07	3.68567e+07	6.08825e+07	3.34393e+07	3.27151e+07	4.1299e+07	4.3073e+07	2.51092e+07	3.71339e+07	4.46604e+07	7.45074e+07	7.20719e+07	4.20443e+07	3.85917e+07
(1R,2R,4aS,6aS,6bR,10S,12aR)-1,10-dihydroxy-1,2,6a,6b,9,9,12a-heptamethyl-2,3,4,5,6,6a,7,8,8a,10,11,12,13,14b-tetradecahydropicene-4a-carboxylic acid	3.91	level1			471.349	288	NEG	4.86048e+07	2.02592e+07	3.96875e+07	1.35083e+07	4.09613e+07	2.3516e+07	7.58807e+07	4.0478e+07	4.88869e+07	6.0181e+07	5.04378e+07	6.57543e+07	1.66318e+07	7.03966e+07	2.58966e+07	1.07223e+07	6.38486e+07	3.98523e+07	5.70331e+07	4.4554e+07	4.06063e+07	3.56041e+07	5.96572e+07	4.54884e+07	4.23947e+07	4.46036e+07	4.5919e+07	4.63455e+07
4-Methylquinolin-2-ol	3.91	level1			160.076	196.3	POS	3.6703e+06	4.53269e+06	4.66069e+06	4.98699e+06	4.75734e+06	3.4621e+06	4.94621e+06	5.18264e+06	5.03726e+06	5.40743e+06	4.55129e+06	4.77534e+06	3.85506e+06	3.35258e+06	3.01103e+06	4.14702e+06	3.17721e+06	3.59876e+06	3.69312e+06	4.57857e+06	4.5671e+06	4.37581e+06	3.76176e+06	4.58262e+06	3.94222e+06	4.31025e+06	4.29401e+06	4.34499e+06
Benzoic acid	3.91	level1			121.029	196.2	NEG	1.15731e+08	1.14456e+08	8.34214e+07	1.17699e+08	1.245e+08	1.05864e+08	1.05323e+08	1.10127e+08	9.54231e+07	1.11363e+08	7.96335e+07	1.07518e+08	1.40657e+08	1.39125e+08	1.44919e+08	1.7485e+08	1.55309e+08	1.8183e+08	9.0779e+07	9.97565e+07	1.09601e+08	1.08314e+08	9.54249e+07	1.02713e+08	1.23992e+08	1.18498e+08	1.17399e+08	1.19584e+08
2-(1-carboxyethyl)-5-methyl-cyclopentanecarboxylic acid	3.91	level1			199.097	207.5	NEG	1.76753e+08	1.84156e+08	1.87231e+08	1.79653e+08	1.83147e+08	1.74778e+08	1.95713e+08	2.13108e+08	1.96133e+08	2.00098e+08	1.81482e+08	1.68923e+08	1.8075e+08	1.61646e+08	1.68747e+08	1.72946e+08	1.54307e+08	1.58162e+08	1.81262e+08	1.98897e+08	2.20686e+08	2.1035e+08	2.21717e+08	1.92397e+08	1.91085e+08	1.86369e+08	1.90105e+08	1.83641e+08
2-Hydroxyoctanoic acid	3.91	level1			159.102	223.4	NEG	2.02723e+06	1.33201e+06	1.19645e+06	1.18806e+06	1.52188e+06	1.63564e+06	2.26549e+06	1.48803e+06	1.93282e+06	2.21587e+06	478294	2.09706e+06	2.74249e+06	2.20076e+06	2.1024e+06	2.34498e+06	2.35312e+06	2.07496e+06	1.94818e+06	1.45249e+06	2.14407e+06	2.51223e+06	2.09632e+06	1.42638e+06	1.80105e+06	2.27068e+06	2.09715e+06	1.80003e+06
5,7-dihydroxy-2-(4-hydroxyphenyl)-3,6-dimethoxy-chromen-4-one	3.91	level1			331.082	220.4	POS	6.6877e+07	5.93778e+07	6.60144e+07	6.38363e+07	6.58135e+07	6.77321e+07	7.90008e+07	6.69156e+07	6.54225e+07	8.15321e+07	9.16821e+07	7.10073e+07	9.48627e+07	9.00605e+07	9.23636e+07	1.01592e+08	8.99178e+07	9.61333e+07	7.05188e+07	9.95694e+07	9.97061e+07	6.84931e+07	8.28118e+07	7.20054e+07	8.27689e+07	8.04999e+07	7.88352e+07	7.92641e+07
Guanosine	3.91	level1			284.099	42	POS	5.24801e+06	6.2368e+06	3.8976e+06	5.36402e+06	6.41673e+06	7.17675e+06	3.60662e+06	4.7336e+06	4.05793e+06	5.76198e+06	3.36344e+06	3.52886e+06	8.42416e+06	7.87043e+06	8.62878e+06	1.03023e+07	8.68081e+06	8.05094e+06	4.5693e+06	6.33164e+06	4.7327e+06	5.63807e+06	4.76764e+06	4.78066e+06	7.0793e+06	6.26972e+06	5.8618e+06	5.65887e+06
6-Hydroxynicotinic acid	3.91	level1			138.02	38.2	NEG	7.69884e+07	2.74725e+07	8.89709e+07	1.58479e+07	1.30776e+07	3.45347e+07	4.14235e+07	2.50479e+07	1.74056e+07	9.93325e+07	1.82307e+07	3.83182e+07	6.10644e+07	9.09975e+07	6.77713e+07	1.35262e+07	7.15459e+07	7.48595e+07	9.46848e+07	9.6634e+07	4.87166e+07	1.32078e+07	1.04261e+08	8.81434e+07	3.00503e+07	9.29349e+07	2.80937e+07	9.13097e+07
2-Aminopurine	3.91	level1			136.062	36.7	POS	5.34626e+07	6.80494e+07	6.01842e+07	6.48466e+07	6.32091e+07	6.69727e+07	5.69937e+07	7.81509e+07	5.8595e+07	7.31285e+07	5.72145e+07	5.57173e+07	8.60989e+07	6.59066e+07	6.58739e+07	9.0018e+07	8.05648e+07	7.63194e+07	4.88998e+07	6.27419e+07	5.83751e+07	5.94763e+07	6.07382e+07	5.80779e+07	7.03401e+07	6.5468e+07	6.69777e+07	6.73078e+07
Serine	3.91	level1			104.035	22.9	NEG	2.20995e+06	2.09551e+06	1.70875e+06	2.73856e+06	3.23221e+06	1.7598e+06	1.29751e+06	1.41804e+06	1.13282e+06	1.98687e+06	1.36541e+06	1.11946e+06	4.30175e+06	3.61897e+06	4.02307e+06	5.20121e+06	3.08293e+06	4.61622e+06	2.58544e+06	2.76744e+06	2.88139e+06	2.71345e+06	2.49819e+06	3.38045e+06	3.27891e+06	2.39666e+06	2.44853e+06	2.61346e+06
(5R)-5-hydroxy-1-(4-hydroxy-3-methoxy-phenyl)dodecan-3-one	3.91	level1			303.196	266.6	NEG	7.10446e+06	6.0441e+06	5.46288e+06	6.65959e+06	8.04348e+06	6.87974e+06	5.39533e+06	4.81454e+06	4.34248e+06	5.4988e+06	6.76649e+06	6.50335e+06	5.318e+06	5.49963e+06	6.07153e+06	4.13956e+06	5.07733e+06	5.02144e+06	5.80647e+06	5.61889e+06	5.55644e+06	7.40105e+06	6.3021e+06	6.27417e+06	6.50565e+06	5.69942e+06	5.80404e+06	5.47786e+06
8-Gingerol;8-GINGEROL	3.91	level1			303.196	266.6	NEG	7.10446e+06	6.0441e+06	5.46288e+06	6.65959e+06	8.04348e+06	6.87974e+06	5.39533e+06	4.81454e+06	4.34248e+06	5.4988e+06	6.76649e+06	6.50335e+06	5.318e+06	5.49963e+06	6.07153e+06	4.13956e+06	5.07733e+06	5.02144e+06	5.80647e+06	5.61889e+06	5.55644e+06	7.40105e+06	6.3021e+06	6.27417e+06	6.50565e+06	5.69942e+06	5.80404e+06	5.47786e+06
3-hydroxy-2-[(Z)-oct-2-enyl]pentanedioic acid	3.91	level1			239.129	249.8	NEG	1.45859e+07	2.07197e+07	2.26253e+07	2.14386e+07	2.74118e+07	2.33263e+07	1.84587e+07	2.28445e+07	2.16577e+07	1.92683e+07	1.99623e+07	2.25305e+07	2.27821e+07	2.19076e+07	2.36137e+07	2.40814e+07	2.35079e+07	2.62982e+07	2.46125e+07	2.33778e+07	1.59867e+07	2.47632e+07	2.65829e+07	1.91872e+07	1.05467e+07	1.0307e+07	1.03718e+07	1.20485e+07
methyl (E)-7-(4-acetoxy-2,6-dimethyl-tetralin-5-yl)-3,5-dihydroxy-hept-6-enoate	3.91	level1			371.187	245.8	NEG	1.49721e+07	2.83763e+07	2.03815e+07	1.76075e+07	2.38443e+07	1.61454e+07	2.18981e+07	1.56029e+07	2.18746e+07	2.22241e+07	1.56146e+07	1.01115e+07	1.14397e+07	8.96721e+06	1.07643e+07	1.05112e+07	1.05155e+07	9.19104e+06	9.34426e+06	1.37458e+07	9.49531e+06	7.10326e+06	1.06317e+07	8.35337e+06	1.31422e+07	1.2724e+07	1.30977e+07	1.27193e+07
(2R,3R,4S,5S,6R)-2-[(E)-5-[(1R,4aS,5S,6R,8aS)-6-hydroxy-5,8a-dimethyl-2-methylene-5-[[(2R,3R,4S,5S,6R)-3,4,5-trihydroxy-6-(hydroxymethyl)tetrahydropyran-2-yl]oxymethyl]decalin-1-yl]-3-methyl-pent-2-enoxy]-6-(hydroxymethyl)tetrahydropyran-3,4,5-triol	3.91	level1			645.349	220.7	NEG	3.07529e+06	2.94037e+06	3.36116e+06	5.68902e+06	2.43199e+06	2.77597e+06	3.22036e+06	3.60519e+06	3.6271e+06	3.84629e+06	3.14573e+06	3.31905e+06	4.23501e+06	4.19255e+06	4.88044e+06	4.78683e+06	3.81669e+06	4.30647e+06	4.27612e+06	5.13629e+06	5.9665e+06	5.83052e+06	4.82984e+06	3.51705e+06	3.49753e+06	3.57413e+06	2.09325e+06	1.84979e+06
2-hydroxy-5,9,13-trimethyl-13-[2-[3,4,5-trihydroxy-6-(hydroxymethyl)tetrahydropyran-2-yl]oxyethyl]-15-oxatetracyclo[8.5.0.01,14.04,9]pentadecane-5-carboxylic acid	3.91	level1			513.269	213.2	NEG	2.20814e+08	2.54035e+08	2.25365e+08	2.2206e+08	2.02259e+08	2.48417e+08	2.83559e+08	7.48683e+08	6.72496e+08	2.58255e+08	2.53732e+08	6.93696e+08	2.3146e+08	2.60846e+08	2.99098e+08	2.50533e+08	2.03638e+08	2.60747e+08	2.1559e+08	3.22863e+08	3.50792e+08	3.39655e+08	3.00949e+08	2.4419e+08	2.62224e+08	2.57299e+08	2.63821e+08	2.63324e+08
Azaleatin	3.91	level1			317.066	211.9	POS	9.40348e+06	9.43238e+06	1.18571e+07	1.09752e+07	9.62404e+06	1.03836e+07	1.69511e+07	1.26434e+07	1.41155e+07	2.1559e+07	2.59105e+07	1.25693e+07	1.35647e+07	1.20604e+07	1.57425e+07	1.35473e+07	1.10168e+07	1.23959e+07	9.14351e+06	1.39216e+07	1.19289e+07	7.42664e+06	1.05089e+07	8.50016e+06	1.36645e+07	1.32603e+07	1.31474e+07	1.25225e+07
(1-Hydroxycyclohexyl)acetic acid	3.91	level1			157.087	172.6	NEG	9.36293e+06	8.50304e+06	1.03177e+07	1.18145e+07	9.10564e+06	1.37222e+07	4.33574e+07	7.43971e+06	9.99833e+06	2.57181e+07	4.278e+07	7.70601e+06	1.91884e+07	7.50928e+06	7.92307e+06	4.958e+06	1.03375e+07	4.37336e+06	8.22893e+06	5.78889e+06	9.16458e+06	1.17304e+07	1.4545e+07	1.30624e+07	1.37664e+07	5.07297e+06	1.16792e+07	1.01967e+07
5-Oxooctanoic acid	3.91	level1			157.087	172.6	NEG	9.36293e+06	8.50304e+06	1.03177e+07	1.18145e+07	9.10564e+06	1.37222e+07	4.33574e+07	7.43971e+06	9.99833e+06	2.57181e+07	4.278e+07	7.70601e+06	1.91884e+07	7.50928e+06	7.92307e+06	4.958e+06	1.03375e+07	4.37336e+06	8.22893e+06	5.78889e+06	9.16458e+06	1.17304e+07	1.4545e+07	1.30624e+07	1.37664e+07	5.07297e+06	1.16792e+07	1.01967e+07
2'-O-Methylinosine	3.91	level1			281.088	66.8	NEG	4.06746e+06	4.58562e+06	2.37332e+06	4.32295e+06	4.17126e+06	4.3582e+06	4.47619e+06	5.02755e+06	4.20468e+06	8.82964e+06	3.73507e+06	3.80901e+06	4.40592e+06	3.23786e+06	4.85892e+06	4.5893e+06	3.78437e+06	4.46494e+06	1.08112e+07	6.94251e+06	6.51072e+06	6.09097e+06	1.03669e+07	1.11457e+07	3.69371e+06	3.33677e+06	8.04938e+06	4.90261e+06
Glycochenodeoxycholic acid	3.9	level1			448.308	287.4	NEG	1.11173e+07	1.24962e+07	1.59417e+07	1.42313e+07	1.49691e+07	1.13645e+07	1.13893e+07	2.14621e+07	1.20965e+07	1.86058e+07	1.7687e+07	1.48346e+07	7.2874e+06	5.94468e+06	6.72857e+06	9.06509e+06	7.19215e+06	8.49435e+06	6.59334e+06	7.97941e+06	6.8271e+06	5.89318e+06	3.32127e+06	7.73524e+06	1.01256e+07	1.03616e+07	1.07304e+07	1.0716e+07
(10R,11R)-10,11-dihydroxy-9-(hydroxymethyl)-1,6a,6b,9,12a-pentamethyl-2-methylene-1,3,4,5,6,6a,7,8,8a,10,11,12,13,14b-tetradecahydropicene-4a-carboxylic acid	3.9	level1			485.327	268.2	NEG	2.97798e+06	2.65621e+06	2.90034e+06	2.92304e+06	2.69838e+06	2.64705e+06	5.0015e+06	3.80837e+06	4.97335e+06	3.80285e+06	4.42893e+06	5.74761e+06	2.15419e+06	3.43138e+06	2.34796e+06	2.31673e+06	2.49645e+06	2.49263e+06	4.34289e+06	3.96704e+06	5.25488e+06	3.48583e+06	3.78982e+06	3.77065e+06	3.38626e+06	3.30117e+06	2.7066e+06	3.29976e+06
(2-hydroxyphenyl)-(4-hydroxyphenyl)methanone	3.9	level1			213.056	243.8	NEG	1.4565e+07	1.80715e+07	5.09137e+06	1.26248e+07	1.60103e+07	1.87479e+07	3.25793e+06	3.7578e+06	5.13941e+06	3.65112e+06	2.75036e+06	5.06852e+06	2.95879e+07	2.53918e+07	2.2275e+07	2.2645e+07	4.42455e+07	9.61103e+06	1.90253e+07	1.04504e+07	1.50031e+07	2.05535e+07	1.008e+07	2.66569e+07	1.45636e+07	1.439e+07	1.45007e+07	1.46037e+07
Prostaglandin A2	3.9	level1			333.208	253.3	NEG	1.49929e+07	5.06007e+07	1.6042e+07	4.68798e+07	5.23892e+07	1.52856e+07	1.5507e+07	5.96872e+07	1.35641e+07	1.66837e+07	2.06392e+07	1.58823e+07	1.36129e+07	1.0904e+07	3.74902e+07	1.38362e+07	3.29448e+07	3.17458e+07	1.40608e+07	1.30799e+07	1.21535e+07	3.44538e+07	1.5258e+07	5.3366e+07	1.34433e+07	1.45137e+07	1.66233e+07	1.42876e+07
N-Phenylacetamide	3.9	level1			136.076	154.3	POS	2.83138e+07	2.75047e+07	2.11901e+07	3.1366e+07	3.6304e+07	2.54586e+07	1.77322e+07	2.12007e+07	2.36725e+07	2.41655e+07	1.79663e+07	1.72756e+07	4.12828e+07	3.48645e+07	3.57938e+07	4.85191e+07	4.04183e+07	4.3781e+07	2.24415e+07	2.73985e+07	2.58868e+07	2.66309e+07	2.21743e+07	2.91421e+07	2.99301e+07	2.83615e+07	2.95579e+07	2.92655e+07
Pomolic acid	3.9	level1			471.349	288	NEG	4.86048e+07	2.02592e+07	3.96875e+07	1.35083e+07	4.09613e+07	2.3516e+07	7.58807e+07	4.0478e+07	4.88869e+07	6.0181e+07	5.04378e+07	6.57543e+07	1.66318e+07	7.03966e+07	2.58966e+07	1.07223e+07	6.38486e+07	3.98523e+07	5.70331e+07	4.4554e+07	4.06063e+07	3.56041e+07	5.96572e+07	4.54884e+07	4.23947e+07	4.46036e+07	4.5919e+07	4.63455e+07
(E,9S,12S,13S)-9,12,13-trihydroxyoctadec-10-enoic acid	3.9	level1			329.233	233.3	NEG	1.26768e+08	1.15983e+08	1.16768e+08	1.13809e+08	1.43462e+08	1.43498e+08	1.47107e+08	1.42845e+08	1.23637e+08	1.55759e+08	1.34158e+08	1.5154e+08	1.2437e+08	1.21725e+08	1.1781e+08	1.2785e+08	1.6784e+08	1.43779e+08	1.23646e+08	1.05598e+08	9.28465e+07	8.75916e+07	1.09891e+08	1.16389e+08	1.26063e+08	1.26754e+08	1.29947e+08	1.28353e+08
(E)-5-(2-formyl-1,4,5,7a-tetramethyl-3a,5,6,7-tetrahydro-3H-inden-4-yl)-3-methylpent-2-enoic acid	3.9	level1			317.212	264.9	NEG	1.8761e+07	1.68613e+07	1.67491e+07	1.61323e+07	2.48293e+07	2.5245e+07	1.59789e+07	2.39014e+07	1.47994e+07	1.72119e+07	1.99698e+07	1.6978e+07	2.18179e+07	1.8102e+07	2.23773e+07	1.99361e+07	2.28449e+07	1.87219e+07	2.30829e+07	2.10563e+07	1.80785e+07	2.11111e+07	2.15936e+07	2.1055e+07	1.99682e+07	1.93716e+07	1.8817e+07	2.06887e+07
Heptadecanoic acid	3.9	level1			269.249	329.6	NEG	1.32918e+08	1.52142e+08	1.37912e+08	1.44187e+08	1.5768e+08	1.46172e+08	1.52862e+08	1.47254e+08	1.34097e+08	1.69719e+08	1.81236e+08	1.62599e+08	1.64835e+08	1.33032e+08	1.50573e+08	1.42868e+08	1.35561e+08	1.26154e+08	1.18354e+08	1.52651e+08	1.45183e+08	1.40368e+08	1.45109e+08	1.39767e+08	1.34667e+08	1.67715e+08	1.58475e+08	1.59698e+08
Dihydrotachysterol	3.9	level1			399.361	327.6	POS	5.70671e+06	5.37105e+06	1.5367e+07	1.14317e+06	6.39594e+06	1.73795e+07	7.14436e+06	6.59192e+06	9.34488e+06	523094	496024	5.69243e+06	7.55631e+06	1.06838e+07	1.24223e+07	6.83054e+06	6.96168e+06	1.57086e+07	4.35853e+06	4.74143e+06	5.37409e+06	4.07375e+06	2.97347e+06	9.27257e+06	7.80711e+06	615192	507093	554809
7-[2,6-dimethyl-8-(2-methylbutanoyloxy)-1,2,6,7,8,8a-hexahydronaphthalen-1-yl]-3,5-dihydroxy-heptanoic acid	3.9	level1			421.259	279.4	NEG	3.88739e+06	4.14548e+06	3.3401e+06	5.47661e+06	4.84918e+06	4.27492e+06	6.58675e+06	6.9944e+06	5.89523e+06	5.2167e+06	4.92617e+06	4.98284e+06	4.64405e+06	6.54569e+06	4.71142e+06	6.86673e+06	3.57316e+06	5.75913e+06	4.42352e+06	5.06996e+06	1.84427e+07	1.40839e+07	3.75045e+06	6.12097e+06	6.20511e+06	6.06637e+06	4.80044e+06	5.51654e+06
Prostaglandin I2 (PGI2)	3.9	level1			351.217	242.5	NEG	9.21677e+07	7.99097e+07	8.82786e+07	7.51691e+07	8.17321e+07	1.02064e+08	1.12144e+08	1.13928e+08	8.59592e+07	2.06362e+08	1.17075e+08	1.17859e+08	9.40929e+07	1.67314e+08	9.03513e+07	8.74418e+07	9.72699e+07	1.62502e+08	9.50555e+07	1.00955e+08	8.83496e+07	9.72058e+07	1.02811e+08	9.50526e+07	9.72534e+07	9.39848e+07	9.18996e+07	9.97846e+07
Quercetin	3.9	level1			301.036	209.5	NEG	1.98085e+07	1.42214e+07	1.42121e+07	9.5359e+06	2.03e+07	2.60089e+07	2.13373e+07	1.13826e+07	1.918e+07	1.95708e+07	8.82781e+06	1.45475e+07	3.84748e+07	4.10206e+07	4.99594e+07	2.03433e+07	2.02978e+07	1.75597e+07	1.48893e+07	2.19678e+07	1.29742e+07	1.05788e+07	1.1832e+07	1.24e+07	2.09418e+07	2.05419e+07	1.98449e+07	2.04978e+07
(1S,3R,4R,5R)-1,3,4-trihydroxy-5-[(E)-3-(4-hydroxy-3-methoxy-phenyl)prop-2-enoyl]oxy-cyclohexanecarboxylic acid	3.9	level1			367.104	163.1	NEG	1.23355e+07	1.50208e+07	1.23645e+07	1.49991e+07	1.77879e+07	1.43165e+07	2.26827e+07	1.28993e+07	2.88438e+07	2.03827e+07	2.54734e+07	9.31805e+06	1.81856e+07	1.58996e+07	1.70944e+07	2.15017e+07	2.34885e+07	1.52727e+07	1.52401e+07	1.085e+07	1.0537e+07	1.11304e+07	1.038e+07	1.41736e+07	1.58651e+07	1.59644e+07	1.46508e+07	1.52939e+07
N-Acetylphenylalanine	3.9	level1			206.082	158.6	NEG	1.86477e+09	2.04615e+09	2.13279e+09	1.97156e+09	2.48052e+09	1.44885e+09	1.12257e+09	1.58527e+09	1.12818e+09	1.69223e+09	1.54403e+09	1.24038e+09	3.68078e+09	2.64784e+09	3.04266e+09	3.79271e+09	2.98341e+09	3.49176e+09	1.73994e+09	1.80153e+09	1.337e+09	1.61177e+09	1.76606e+09	1.77301e+09	2.13339e+09	2.11907e+09	2.0957e+09	2.10898e+09
Caprolactam	3.9	level1			114.091	118.9	POS	3.91351e+06	6.26801e+06	5.98634e+06	8.7336e+06	5.36311e+06	3.65822e+06	2.23696e+07	1.3705e+07	1.36103e+07	1.95281e+07	2.19328e+07	1.23508e+07	5.17277e+06	4.70395e+06	5.80622e+06	5.58458e+06	5.07003e+06	5.84775e+06	4.93895e+06	4.99196e+06	5.70562e+06	4.3106e+06	4.22571e+06	3.4807e+06	7.37071e+06	6.1724e+06	4.71842e+06	5.84821e+06
2-Ethyl-2-hydroxybutyric acid	3.9	level1			131.071	108.3	NEG	4.31102e+07	4.19641e+07	4.83222e+07	4.21736e+07	2.34243e+07	4.84462e+07	2.97518e+07	5.63231e+07	4.9101e+07	5.04154e+07	4.8003e+07	5.78836e+07	2.08134e+07	3.32472e+07	3.44135e+07	1.77209e+07	2.00056e+07	1.86149e+07	3.60606e+07	3.20066e+07	3.27257e+07	3.79824e+07	4.34189e+07	4.71997e+07	4.70924e+07	4.40524e+07	4.5316e+07	4.58681e+07
gamma-Glutamylleucine	3.9	level1			259.13	94.6	NEG	6.09424e+06	5.80011e+06	2.99951e+06	6.17099e+06	9.27616e+06	5.27651e+06	2.10091e+06	3.12352e+06	2.47453e+06	3.8906e+06	2.39976e+06	2.61537e+06	5.29807e+06	4.40159e+06	1.31018e+06	6.44074e+06	4.03768e+06	4.89435e+06	3.63895e+06	4.09758e+06	3.10027e+06	3.76329e+06	2.53791e+06	4.11319e+06	5.12323e+06	4.48871e+06	4.36734e+06	4.31909e+06
3-Hydorxy-3-methylglutaric acid	3.9	level1			143.035	29.4	NEG	6.88765e+06	5.95581e+06	5.20147e+06	6.59242e+06	6.18034e+06	5.63324e+06	6.593e+06	6.37382e+06	6.84402e+06	5.91584e+06	6.03456e+06	5.82192e+06	6.68606e+06	6.38611e+06	7.58037e+06	7.16473e+06	5.53592e+06	7.0196e+06	6.8917e+06	7.24344e+06	7.77234e+06	7.62907e+06	7.12729e+06	6.9356e+06	6.68579e+06	6.80053e+06	6.76762e+06	6.17455e+06
3-Pyridylacetic acid	3.9	level1			138.055	25.6	POS	4.78107e+07	4.52065e+07	4.33236e+07	4.52112e+07	4.13118e+07	4.03434e+07	4.39513e+07	5.07069e+07	4.6161e+07	4.76308e+07	4.17731e+07	4.37216e+07	7.57757e+07	8.64865e+07	8.75609e+07	8.54418e+07	5.83854e+07	8.95557e+07	7.14606e+07	8.5225e+07	9.31423e+07	7.34937e+07	7.05929e+07	5.37591e+07	6.3344e+07	6.0244e+07	6.03926e+07	6.09063e+07
Aspartate	3.9	level1			134.045	22.8	POS	7.27886e+06	9.4533e+06	9.00984e+06	9.58564e+06	1.01999e+07	6.01489e+06	5.38009e+06	8.62868e+06	5.38978e+06	6.94975e+06	6.69636e+06	4.39546e+06	7.65085e+06	9.52514e+06	7.11215e+06	9.37439e+06	4.00042e+06	8.5238e+06	8.52717e+06	1.0776e+07	8.78334e+06	7.85709e+06	5.34147e+06	7.57676e+06	9.58496e+06	8.08035e+06	6.96253e+06	8.09005e+06
(4E,8E,12E,16E)-2,3,7,11,15-pentahydroxy-4,6,8,10,12,14,16-heptamethyl-octadeca-4,8,12,16-tetraenoic acid	3.9	level1			453.286	265.6	NEG	2.08641e+07	7.10829e+07	4.69611e+07	3.68774e+07	1.01582e+07	2.80048e+07	7.5421e+07	2.84166e+08	1.55121e+07	2.65208e+07	1.23477e+07	5.23963e+07	8.86051e+07	4.18073e+08	2.61179e+08	3.32486e+08	1.58315e+08	2.57383e+08	3.45384e+08	5.94003e+07	8.66534e+07	4.84513e+07	6.33295e+07	1.34314e+08	1.18801e+08	1.2498e+08	1.25822e+08	1.28941e+08
N-Lactoyl-Phenylalanine	3.9	level1			238.108	161	POS	7.85335e+06	9.68141e+06	6.8246e+06	9.12715e+06	8.80258e+06	6.4757e+06	6.84964e+06	7.59412e+06	7.06915e+06	7.2747e+06	5.79175e+06	5.76856e+06	7.60767e+06	6.85298e+06	6.81291e+06	8.5789e+06	6.90274e+06	7.80027e+06	7.01981e+06	8.40493e+06	7.02193e+06	7.25846e+06	6.03216e+06	9.61717e+06	7.85943e+06	7.86677e+06	8.00291e+06	7.89893e+06
5-Acetyluracil	3.9	level1			153.03	44.7	NEG	9.05113e+06	1.10921e+07	1.79174e+07	1.03633e+07	9.01387e+06	7.61139e+06	5.25209e+06	9.67728e+06	7.15287e+06	1.23529e+07	8.69629e+06	8.46722e+06	1.52163e+07	1.44625e+07	1.37636e+07	1.53723e+07	1.51325e+07	1.53826e+07	1.09749e+07	1.33566e+07	1.01977e+07	9.28962e+06	8.14587e+06	1.14272e+07	8.62029e+06	1.15931e+07	1.20821e+07	1.19957e+07
3-hydroxy-2,3,4-trimethyl-5-oxo-tetrahydrofuran-2-carboxylic acid	3.9	level1			187.061	42.7	NEG	1.34175e+07	9.79959e+06	1.46462e+07	6.47151e+06	6.22288e+06	8.29039e+06	1.06119e+07	9.93769e+06	9.55265e+06	1.54928e+07	1.70618e+07	1.89612e+07	1.81551e+07	1.60684e+07	1.49292e+07	9.18996e+06	1.50855e+07	1.40113e+07	1.60198e+07	1.70657e+07	1.68695e+07	1.07688e+07	1.83077e+07	1.75645e+07	1.00531e+07	1.67621e+07	1.56127e+07	1.019e+07
1-Methylpseudouridine	3.9	level1			257.078	26.9	NEG	1.66043e+07	2.12756e+07	1.76011e+07	1.55661e+07	1.60382e+07	1.52795e+07	1.07709e+07	1.45947e+07	1.27098e+07	1.51321e+07	1.28007e+07	1.55568e+07	1.0914e+07	1.12174e+07	1.29681e+07	9.4417e+06	7.96261e+06	9.20853e+06	1.62668e+07	1.18919e+07	9.28743e+06	1.34717e+07	1.16891e+07	9.84562e+06	1.33876e+07	1.40255e+07	1.38381e+07	1.21577e+07
(2E,4Z)-9-oxooctadeca-2,4-dienoic acid	3.89	level1			293.212	292	NEG	2.55322e+09	2.63292e+09	1.83236e+09	2.44815e+09	2.42706e+09	2.0853e+09	1.53356e+09	1.60997e+09	2.452e+09	2.18718e+09	1.10413e+09	2.95733e+09	4.81713e+09	3.55358e+09	4.11414e+09	3.52893e+09	3.24441e+09	3.41475e+09	2.57753e+09	2.79534e+09	3.20473e+09	3.47123e+09	2.51742e+09	2.25305e+09	2.76217e+09	2.69125e+09	2.72814e+09	2.71571e+09
5,7-dihydroxy-2-(2-hydroxyphenyl)-6,8-dimethoxy-chromen-4-one	3.89	level1			329.066	220.7	NEG	9.75614e+07	9.20413e+07	1.07813e+08	9.42648e+07	9.78682e+07	1.08548e+08	1.30109e+08	1.07156e+08	1.03487e+08	1.35505e+08	1.57087e+08	1.2303e+08	1.2383e+08	1.19785e+08	1.17994e+08	1.25492e+08	1.18319e+08	1.26514e+08	1.01371e+08	1.49941e+08	1.48396e+08	9.78891e+07	1.20554e+08	1.10201e+08	1.12899e+08	1.17489e+08	1.19703e+08	1.21272e+08
Trigonelline	3.89	level1			138.055	25.6	POS	4.78107e+07	4.52065e+07	4.33236e+07	4.52112e+07	4.13118e+07	4.03434e+07	4.39513e+07	5.07069e+07	4.6161e+07	4.76308e+07	4.17731e+07	4.37216e+07	7.57757e+07	8.64865e+07	8.75609e+07	8.54418e+07	5.83854e+07	8.95557e+07	7.14606e+07	8.5225e+07	9.31423e+07	7.34937e+07	7.05929e+07	5.37591e+07	6.3344e+07	6.0244e+07	6.03926e+07	6.09063e+07
Ribothymidine	3.89	level1			257.078	26.9	NEG	1.66043e+07	2.12756e+07	1.76011e+07	1.55661e+07	1.60382e+07	1.52795e+07	1.07709e+07	1.45947e+07	1.27098e+07	1.51321e+07	1.28007e+07	1.55568e+07	1.0914e+07	1.12174e+07	1.29681e+07	9.4417e+06	7.96261e+06	9.20853e+06	1.62668e+07	1.18919e+07	9.28743e+06	1.34717e+07	1.16891e+07	9.84562e+06	1.33876e+07	1.40255e+07	1.38381e+07	1.21577e+07
Palmitic acid	3.89	level1			255.232	323.7	NEG	7.22486e+08	7.93861e+08	8.01851e+08	7.14965e+08	8.04789e+08	7.7728e+08	7.54857e+08	7.23414e+08	7.57344e+08	7.42116e+08	7.72084e+08	7.13268e+08	8.9669e+08	7.54252e+08	6.92966e+08	7.08422e+08	6.67667e+08	7.04066e+08	6.44142e+08	7.44257e+08	6.88693e+08	6.94777e+08	6.90814e+08	8.06467e+08	7.08757e+08	7.87418e+08	7.14271e+08	7.85426e+08
1-Oleoyl-sn-glycerol 3-phosphate	3.89	level1			435.252	332.8	NEG	9.80165e+06	6.69437e+06	7.83718e+06	1.20027e+07	9.13386e+06	9.84095e+06	9.78609e+06	8.10271e+06	8.07965e+06	9.47311e+06	8.87851e+06	1.04281e+07	1.02999e+07	9.64318e+06	1.39437e+07	8.6892e+06	1.07626e+07	1.2212e+07	8.83668e+06	7.89836e+06	8.94604e+06	8.41725e+06	9.8443e+06	7.5121e+06	1.05514e+07	8.79506e+06	8.32787e+06	8.7833e+06
Hexadecanedioic acid	3.89	level1			285.207	272.8	NEG	1.84485e+07	1.82698e+07	1.3934e+07	1.80896e+07	1.62476e+07	1.8886e+07	1.86548e+07	1.92662e+07	1.99751e+07	1.82308e+07	1.53948e+07	1.69731e+07	2.47252e+07	1.59069e+07	1.61736e+07	1.72988e+07	1.52055e+07	1.56627e+07	1.90075e+07	1.99716e+07	2.00907e+07	1.87525e+07	1.8311e+07	1.66195e+07	1.74478e+07	1.76903e+07	1.77365e+07	1.88096e+07
Valpromide	3.89	level1			144.138	226.3	POS	5.01119e+06	5.33095e+06	5.18986e+06	5.67941e+06	5.27106e+06	5.0711e+06	4.36649e+06	5.14783e+06	4.3135e+06	4.14456e+06	5.2892e+06	4.88909e+06	4.66863e+06	4.20365e+06	4.76115e+06	4.12729e+06	4.33861e+06	4.60341e+06	4.06158e+06	4.67046e+06	5.08078e+06	4.47652e+06	5.88807e+06	4.68431e+06	3.25613e+06	3.24178e+06	3.66325e+06	3.29528e+06
Butyllactate	3.89	level1			145.087	195.6	NEG	4.10999e+07	3.87031e+07	4.05757e+07	4.12627e+07	4.49134e+07	4.03358e+07	4.50221e+07	5.43392e+07	4.31083e+07	4.96587e+07	4.22292e+07	4.38858e+07	5.21112e+07	4.624e+07	5.07405e+07	5.48041e+07	5.06771e+07	5.07594e+07	4.15097e+07	4.91679e+07	5.25302e+07	4.91995e+07	4.89208e+07	4.87319e+07	4.93887e+07	5.08417e+07	4.75528e+07	4.76654e+07
Indole-3-carboxylic acid	3.89	level1			160.04	194.3	NEG	5.05737e+07	5.30814e+07	4.70694e+07	5.2359e+07	5.25609e+07	5.25239e+07	6.95388e+07	8.3256e+07	7.399e+07	8.36032e+07	4.85988e+07	8.14145e+07	7.34831e+07	7.35549e+07	7.44487e+07	7.61326e+07	7.79434e+07	8.05668e+07	6.77303e+07	8.18143e+07	9.17212e+07	8.27533e+07	7.32685e+07	7.79902e+07	7.31094e+07	7.11459e+07	7.09129e+07	7.16131e+07
Indole-3-carboxaldehyde	3.89	level1			144.045	191.6	NEG	2.8376e+07	2.72861e+07	2.67983e+07	2.65707e+07	3.25229e+07	2.56203e+07	3.05242e+07	3.95081e+07	2.64284e+07	4.11188e+07	2.8563e+07	4.01953e+07	3.39107e+07	3.11604e+07	2.96541e+07	3.19979e+07	4.09118e+07	3.36292e+07	2.49124e+07	2.42686e+07	3.051e+07	3.30867e+07	2.41578e+07	3.22525e+07	3.13744e+07	2.95025e+07	3.27275e+07	3.07925e+07
Phosphate	3.89	level1			78.959	30.1	NEG	6.73348e+06	6.61073e+06	4.80963e+06	6.28944e+06	2.7556e+06	7.66643e+06	9.70653e+06	9.18342e+06	1.03414e+07	6.85003e+06	7.41656e+06	7.82658e+06	5.58232e+07	7.95989e+07	2.00869e+07	1.6429e+07	1.24224e+07	2.76756e+07	1.95052e+07	2.07318e+07	1.67996e+07	6.0969e+07	2.64212e+07	5.6819e+07	3.22199e+07	3.52986e+07	1.20231e+07	1.21823e+07
Trimethylamine N-oxide	3.89	level1			76.0757	25.4	POS	5.3563e+07	5.64441e+07	9.76432e+07	6.02848e+07	4.65158e+07	3.67619e+07	5.01603e+07	7.17651e+07	4.90533e+07	5.06041e+07	7.44274e+07	6.49865e+07	2.24105e+07	2.32112e+07	3.40005e+07	2.05534e+07	1.40872e+07	2.10494e+07	5.1021e+07	3.72116e+07	2.44774e+07	3.3795e+07	3.13499e+07	3.19947e+07	4.63314e+07	4.44229e+07	4.26694e+07	4.15446e+07
Proline	3.89	level1			116.07	25.1	POS	8.16505e+06	9.77739e+06	4.96998e+06	8.33563e+06	9.37278e+06	1.29771e+07	3.47942e+06	4.50204e+06	5.84228e+06	6.93011e+06	5.63905e+06	5.18023e+06	1.11988e+07	9.22358e+06	9.41381e+06	1.18203e+07	1.17715e+07	1.0569e+07	5.7525e+06	7.97042e+06	5.80906e+06	6.31659e+06	4.48314e+06	7.02829e+06	8.88713e+06	9.79558e+06	7.47271e+06	7.99147e+06
Isosteviol	3.89	level1			317.212	293.3	NEG	4.33437e+06	4.04856e+06	3.19779e+06	4.88618e+06	4.28052e+06	4.93517e+06	4.15661e+06	4.729e+06	3.15975e+06	4.40096e+06	4.86734e+06	3.70994e+06	4.16434e+06	2.97607e+06	9.92189e+06	4.36385e+06	4.96754e+06	4.2546e+06	4.61627e+06	3.26891e+06	4.49347e+06	4.34985e+06	5.25169e+06	3.92947e+06	4.16568e+06	5.30298e+06	4.50703e+06	4.06693e+06
4-acetoxy-8-(3-oxo-2-pent-2-enyl-cyclopenten-1-yl)octanoic acid	3.89	level1			349.201	241.3	NEG	3.50383e+07	3.18712e+07	2.88667e+07	2.6556e+07	3.16895e+07	3.54178e+07	3.56243e+07	3.22261e+07	2.31652e+07	3.52788e+07	3.75258e+07	3.38052e+07	3.32199e+07	3.07445e+07	3.32494e+07	3.1839e+07	3.35946e+07	2.91594e+07	3.52072e+07	3.58568e+07	3.07634e+07	7.08721e+07	3.63524e+07	6.6486e+07	3.01793e+07	3.19331e+07	3.43152e+07	3.33052e+07
Aurantiamide	3.89	level1			403.201	236.2	POS	6.1646e+06	6.90733e+06	6.49792e+06	4.51512e+06	3.38358e+06	1.33491e+07	4.25492e+06	1.0573e+06	1.56551e+06	1.24052e+06	4.36613e+06	1.47427e+07	8.84824e+06	1.275e+07	6.7956e+06	7.18518e+06	2.33437e+07	9.75992e+06	3.08907e+07	8.01504e+06	6.50038e+06	8.9639e+06	1.93762e+07	1.39072e+07	8.26391e+06	9.32061e+06	9.49989e+06	9.32907e+06
(2R,3R)-3-(4-hydroxy-3-methoxy-phenyl)-2-(hydroxymethyl)-5-methoxy-2,3-dihydropyrano[3,2-h][1,4]benzodioxin-9-one	3.89	level1			387.107	194.8	POS	5.19601e+06	5.39987e+06	5.53355e+06	3.72367e+06	6.13751e+06	3.08099e+06	1.61807e+07	9.75344e+06	1.46614e+07	1.11738e+07	1.12634e+07	1.70133e+07	4.16868e+06	4.89742e+06	5.49016e+06	2.34973e+06	3.25391e+06	3.41906e+06	5.001e+06	4.12635e+06	4.78632e+06	3.64876e+06	7.46832e+06	3.79531e+06	5.90874e+06	6.75378e+06	6.49166e+06	6.11249e+06
(2R,3S,4S,5R,6R)-2-[[(2R,3R,4R)-3,4-dihydroxy-4-(hydroxymethyl)tetrahydrofuran-2-yl]oxymethyl]-6-[2-(4-hydroxyphenyl)ethoxy]tetrahydropyran-3,4,5-triol	3.89	level1			431.157	154.8	NEG	2.43545e+08	2.49414e+08	2.26384e+08	2.70625e+08	2.80916e+08	2.29817e+08	1.89467e+08	2.28976e+08	2.15427e+08	1.85061e+08	1.86896e+08	1.45305e+08	1.09316e+08	1.17357e+08	1.21075e+08	1.31725e+08	1.0104e+08	1.22515e+08	2.43462e+08	2.44268e+08	3.26595e+08	2.74426e+08	2.44355e+08	2.42521e+08	2.11376e+08	2.05731e+08	1.95919e+08	2.08727e+08
2,2,6,6-Tetramethyl-4-piperidinyl 2-methylacrylate	3.89	level1			208.169	139.8	POS	2.36151e+06	2.53791e+06	4.9572e+06	5.55999e+06	3.47659e+06	4.04043e+06	1.13794e+07	6.06752e+06	7.78678e+06	1.01736e+07	5.16664e+06	8.54951e+06	7.20979e+06	9.16657e+06	9.30965e+06	6.37818e+06	6.0596e+06	6.50498e+06	4.27427e+06	5.82509e+06	5.76481e+06	5.7798e+06	6.1539e+06	7.64495e+06	5.8706e+06	5.88892e+06	7.66433e+06	7.98255e+06
trans-3'-Hydroxycotinine	3.89	level1			193.097	42.9	POS	3.73982e+07	3.5312e+07	2.9001e+07	2.72735e+07	2.66378e+07	3.68789e+07	3.8682e+07	2.85552e+07	3.98808e+07	3.85196e+07	3.36801e+07	4.20886e+07	4.29052e+07	5.14817e+07	3.80118e+07	4.30622e+07	3.89256e+07	4.26629e+07	4.92408e+07	3.54571e+07	4.36808e+07	4.9972e+07	5.21243e+07	4.18279e+07	4.25528e+07	4.14418e+07	4.43017e+07	4.7631e+07
Betaine	3.89	level1			118.086	25.2	POS	1.32644e+08	1.11328e+08	9.48229e+07	1.11644e+08	1.11766e+08	1.22525e+08	1.30739e+08	1.41499e+08	1.25155e+08	1.26322e+08	1.13897e+08	1.72959e+08	2.32554e+08	2.49285e+08	2.38095e+08	2.38598e+08	1.65933e+08	2.14187e+08	1.42293e+08	1.8055e+08	1.96659e+08	1.46037e+08	1.59169e+08	1.4484e+08	1.60882e+08	1.64757e+08	1.66407e+08	1.60027e+08
2-(3,4-dihydroxyphenyl)-7-hydroxy-5-[(2S,3R,4S,5S,6R)-3,4,5-trihydroxy-6-[[(2R,3R,4R,5R,6S)-3,4,5-trihydroxy-6-methyl-tetrahydropyran-2-yl]oxymethyl]tetrahydropyran-2-yl]oxy-chromen-4-one	3.88	level1			595.165	189.3	POS	1.04368e+07	1.03381e+07	5.68612e+06	6.38619e+06	1.04761e+07	1.29536e+07	1.43426e+07	8.1068e+06	1.65783e+07	1.1602e+07	9.16447e+06	9.37881e+06	2.64385e+07	2.72895e+07	2.69724e+07	2.28904e+07	2.38317e+07	1.78227e+07	9.9221e+06	1.05702e+07	8.0247e+06	8.87485e+06	1.32094e+07	1.22586e+07	1.42173e+07	1.41117e+07	1.45699e+07	1.44002e+07
Adipic acid	3.88	level1			145.05	95.6	NEG	3.99622e+07	3.19793e+07	7.42955e+07	3.84423e+07	3.59381e+07	6.82379e+07	3.64074e+07	8.77227e+07	3.24604e+07	4.53333e+07	4.33194e+07	7.93094e+07	4.66031e+07	7.23333e+07	4.16772e+07	3.68567e+07	6.08825e+07	3.34393e+07	3.27151e+07	4.1299e+07	4.3073e+07	2.51092e+07	3.71339e+07	4.46604e+07	7.45074e+07	7.20719e+07	4.20443e+07	3.85917e+07
NAE(18:3(6Z,9Z,12Z))	3.88	level1			322.274	288.7	POS	1.49465e+07	1.64498e+07	1.64218e+07	1.75659e+07	1.54032e+07	1.41976e+07	1.3708e+07	1.35821e+07	1.57412e+07	1.30053e+07	1.3737e+07	1.18871e+07	1.62325e+07	1.35446e+07	1.44364e+07	1.49052e+07	1.2411e+07	1.2508e+07	1.10314e+07	1.39229e+07	1.17828e+07	1.19144e+07	1.12399e+07	1.42317e+07	1.35409e+07	1.39589e+07	1.46398e+07	1.37099e+07
Abscisic acid	3.88	level1			263.129	201.9	NEG	6.07029e+07	6.50418e+07	3.67396e+07	5.28293e+07	2.85467e+07	5.46231e+07	3.46265e+07	4.00599e+07	3.20331e+07	3.87085e+07	3.9595e+07	3.6875e+07	1.91734e+07	1.913e+07	2.21312e+07	3.40826e+07	1.65719e+07	1.66284e+07	2.77266e+07	4.37078e+07	2.83201e+07	5.44538e+07	2.90681e+07	3.04607e+07	2.84336e+07	5.95772e+07	2.78371e+07	6.06131e+07
N-Lactoylphenylalanine	3.88	level1			238.108	161	POS	7.85335e+06	9.68141e+06	6.8246e+06	9.12715e+06	8.80258e+06	6.4757e+06	6.84964e+06	7.59412e+06	7.06915e+06	7.2747e+06	5.79175e+06	5.76856e+06	7.60767e+06	6.85298e+06	6.81291e+06	8.5789e+06	6.90274e+06	7.80027e+06	7.01981e+06	8.40493e+06	7.02193e+06	7.25846e+06	6.03216e+06	9.61717e+06	7.85943e+06	7.86677e+06	8.00291e+06	7.89893e+06
Dydrogesterone	3.88	level1			313.216	250.6	POS	5.3828e+06	5.78729e+06	5.02174e+06	5.00658e+06	5.43548e+06	6.61039e+06	4.76306e+06	7.36489e+06	4.91951e+06	7.59674e+06	5.9118e+06	5.04163e+06	4.92944e+06	4.30118e+06	4.91499e+06	5.00324e+06	5.76334e+06	5.1436e+06	4.71807e+06	5.38091e+06	4.32549e+06	5.72889e+06	5.34382e+06	6.60351e+06	4.97653e+06	6.85459e+06	5.96869e+06	5.54946e+06
2-Hydroxydecanoic-acid	3.88	level1			187.133	247.8	NEG	3.86832e+06	2.75206e+06	2.61207e+06	3.65109e+06	3.18511e+06	2.81223e+06	5.57988e+06	4.24554e+06	6.67882e+06	7.27604e+06	3.07478e+06	1.08002e+07	6.09487e+06	3.61052e+06	5.84699e+06	4.32224e+06	5.08738e+06	4.47886e+06	3.13793e+06	2.59653e+06	3.39119e+06	2.89128e+06	3.40968e+06	3.52987e+06	3.04049e+06	3.61919e+06	2.95831e+06	2.55496e+06
Sebacic acid	3.88	level1			201.113	212.8	NEG	8.09762e+07	8.91229e+07	5.02682e+07	5.91643e+07	7.59205e+07	6.38255e+07	7.60152e+07	6.91057e+07	7.54355e+07	6.74299e+07	6.08824e+07	5.99841e+07	5.05546e+07	5.27469e+07	5.34579e+07	8.63412e+07	5.52651e+07	5.26488e+07	5.79021e+07	6.22725e+07	1.03327e+08	6.53505e+07	7.34318e+07	6.88591e+07	6.09695e+07	6.38699e+07	6.28121e+07	6.25312e+07
Azelaic acid	3.88	level1			169.087	201.5	NEG	3.85694e+06	4.83087e+06	3.6356e+06	3.72742e+06	4.67733e+06	4.5474e+06	4.47122e+06	5.6921e+06	4.7771e+06	5.74431e+06	4.12325e+06	3.60168e+06	5.56128e+06	5.2525e+06	4.02057e+06	4.54201e+06	4.90519e+06	5.11165e+06	4.31814e+06	5.19182e+06	5.84745e+06	5.0884e+06	5.2008e+06	6.12164e+06	5.3519e+06	5.04322e+06	5.00069e+06	4.35325e+06
N-trans-Feruloyltyramine	3.88	level1			312.124	196.9	NEG	1.64898e+07	1.60967e+07	2.64258e+07	1.58018e+07	1.8483e+07	2.05332e+07	2.7645e+07	1.03566e+07	4.52749e+07	1.73821e+07	2.12462e+07	2.81785e+07	8.63234e+06	1.07279e+07	2.03491e+07	6.73719e+06	1.1315e+07	6.72147e+06	9.63082e+06	1.44018e+07	1.32535e+07	9.62679e+06	2.07229e+07	7.73248e+06	1.78415e+07	1.6685e+07	1.76526e+07	1.64227e+07
(6S,7aR)-6-hydroxy-4,4,7a-trimethyl-6,7-dihydro-5H-benzofuran-2-one	3.88	level1			197.117	176.9	POS	3.0373e+08	2.81834e+08	3.74652e+08	3.02653e+08	2.727e+08	4.30559e+08	3.51314e+08	3.46841e+08	3.61625e+08	3.15076e+08	3.9102e+08	3.31985e+08	2.06731e+08	1.9295e+08	1.98283e+08	2.10252e+08	1.72357e+08	1.87851e+08	2.3527e+08	2.51969e+08	2.38354e+08	2.52537e+08	2.39093e+08	2.52157e+08	2.76855e+08	2.73057e+08	2.71341e+08	2.69803e+08
Hydroxytyrosol acetate	3.88	level1			195.066	176.4	NEG	1.15973e+07	1.01935e+07	1.30882e+07	1.03421e+07	1.20171e+07	1.10036e+07	1.47575e+07	1.24438e+07	1.98616e+07	1.78714e+07	1.34769e+07	1.13004e+07	7.92671e+06	7.89351e+06	1.0154e+07	1.19694e+07	8.26121e+06	9.39878e+06	9.00269e+06	1.0141e+07	8.38652e+06	8.28166e+06	1.10248e+07	9.88133e+06	1.09639e+07	1.16149e+07	1.09213e+07	1.70616e+07
2,2'-Bipyridine	3.88	level1			157.076	166.9	POS	2.59902e+09	2.37797e+09	2.30188e+09	2.44064e+09	2.51905e+09	2.45902e+09	2.70047e+09	2.68999e+09	2.74718e+09	2.38243e+09	2.65948e+09	2.51685e+09	1.98585e+09	2.01474e+09	2.04901e+09	2.00648e+09	1.90458e+09	1.9745e+09	2.14317e+09	2.39259e+09	2.45508e+09	2.37619e+09	2.26638e+09	2.30116e+09	2.36388e+09	2.39805e+09	2.37794e+09	2.36295e+09
Leucylphenylalanine	3.88	level1			279.17	160.3	POS	1.51769e+07	1.72306e+07	1.33237e+07	1.67215e+07	2.00975e+07	1.42438e+07	8.35181e+06	1.21675e+07	1.00974e+07	1.18907e+07	9.47567e+06	7.46008e+06	1.40222e+07	1.15945e+07	1.26021e+07	1.56112e+07	1.27165e+07	1.32619e+07	1.26805e+07	1.54707e+07	1.29523e+07	1.37396e+07	1.04076e+07	1.3935e+07	1.4175e+07	1.33992e+07	1.37583e+07	1.36058e+07
Pyrocatechol	3.88	level1			109.029	123	NEG	1.3032e+07	1.31035e+07	1.06479e+07	1.3277e+07	1.30735e+07	1.12872e+07	1.15155e+07	1.17327e+07	1.20921e+07	1.14757e+07	2.89743e+06	1.05053e+07	3.04113e+06	6.84887e+06	8.4714e+06	1.09096e+07	1.09842e+07	3.98033e+06	1.27722e+07	9.82546e+06	1.30749e+07	1.24118e+07	1.27814e+07	1.1565e+07	1.27461e+07	1.31036e+07	2.62008e+06	9.92704e+06
Hydroquinone	3.88	level1			109.029	123	NEG	1.3032e+07	1.31035e+07	1.06479e+07	1.3277e+07	1.30735e+07	1.12872e+07	1.15155e+07	1.17327e+07	1.20921e+07	1.14757e+07	2.89743e+06	1.05053e+07	3.04113e+06	6.84887e+06	8.4714e+06	1.09096e+07	1.09842e+07	3.98033e+06	1.27722e+07	9.82546e+06	1.30749e+07	1.24118e+07	1.27814e+07	1.1565e+07	1.27461e+07	1.31036e+07	2.62008e+06	9.92704e+06
Thymine	3.88	level1			125.035	42.6	NEG	4.24167e+06	5.48753e+06	1.10547e+07	2.57561e+06	2.46158e+06	3.18985e+06	6.08828e+06	1.2671e+07	4.40273e+06	9.11941e+06	9.25736e+06	1.33443e+07	5.88601e+06	5.13865e+06	6.31165e+06	2.66015e+06	3.02522e+06	4.12945e+06	5.47309e+06	4.60025e+06	7.02994e+06	5.29103e+06	4.36084e+06	4.48333e+06	3.21116e+06	6.31967e+06	3.08763e+06	6.12142e+06
Deoxyguanosine	3.88	level1			266.089	41.4	NEG	4.74691e+06	2.31732e+07	2.16087e+07	1.39681e+07	1.52424e+07	2.02273e+07	1.74048e+07	2.08545e+07	4.61632e+06	2.14407e+07	5.43424e+06	1.60694e+07	1.26938e+07	1.15936e+07	1.32785e+07	1.39662e+07	1.0446e+07	1.08048e+07	9.90812e+06	1.27207e+07	1.17873e+07	1.06148e+07	1.15532e+07	1.20304e+07	1.09972e+07	1.70993e+07	1.42728e+07	1.51966e+07
Tryptamine	3.88	level1			161.108	32.6	POS	5.14614e+08	4.94459e+08	2.22294e+09	5.45173e+08	4.5366e+08	5.47545e+08	4.817e+08	4.46535e+08	4.85517e+08	2.22801e+09	2.08053e+09	4.46344e+08	2.71774e+09	2.32215e+09	5.17002e+08	2.83678e+09	2.37874e+09	2.42934e+09	5.33939e+08	5.41786e+08	5.9682e+08	3.43786e+09	5.73734e+08	5.22748e+08	5.33825e+08	4.88268e+08	5.26112e+08	5.42209e+08
Gluconic acid	3.88	level1			195.051	22.9	NEG	1.51962e+08	1.2831e+08	1.00671e+08	1.4909e+08	1.40731e+08	1.2689e+08	1.69311e+08	1.81072e+08	2.26954e+08	1.31549e+08	1.38896e+08	1.65219e+08	1.57485e+08	2.17696e+08	1.89674e+08	1.79052e+08	1.17454e+08	1.58091e+08	1.93516e+08	2.10909e+08	2.08301e+08	2.03929e+08	2.02445e+08	2.22798e+08	1.64826e+08	1.85539e+08	1.62656e+08	1.68692e+08
5-Aminopentanoic acid	3.88	level1			100.076	9.2	POS	6.89144e+06	4.89242e+06	5.80527e+06	6.33498e+06	1.34602e+07	6.39159e+06	6.79414e+06	6.23701e+06	6.98468e+06	4.79643e+06	5.80301e+06	1.17349e+07	6.14446e+06	1.19346e+07	7.16768e+06	7.20723e+06	6.041e+06	1.15494e+07	6.88866e+06	4.77191e+06	1.3799e+07	5.75052e+06	7.45383e+06	6.61663e+06	7.773e+06	6.05493e+06	5.55736e+06	5.28186e+06
N-benzylacetamide	3.88	level1			150.091	188	POS	2.59074e+06	3.5614e+06	2.04108e+06	2.35832e+06	2.52381e+06	2.00518e+06	1.4542e+06	2.81778e+06	2.60575e+06	2.05212e+06	1.63698e+06	2.39521e+06	7.40036e+06	6.79022e+06	6.44306e+06	9.18348e+06	8.53568e+06	8.53018e+06	2.29365e+06	3.41365e+06	2.69443e+06	3.16807e+06	2.67485e+06	1.81949e+06	4.3685e+06	3.2701e+06	3.32782e+06	3.40479e+06
2-(7-amino-4-methyl-2-oxo-chromen-3-yl)acetic acid	3.88	level1			232.062	182.2	NEG	8.39069e+06	7.31953e+06	7.22768e+06	4.75278e+06	7.05626e+06	8.24678e+06	1.22511e+07	1.24713e+07	1.8176e+07	1.4358e+07	7.78944e+06	2.91614e+07	1.46052e+07	1.31633e+07	1.55092e+07	1.19533e+07	1.36208e+07	1.04367e+07	9.48435e+06	9.20641e+06	1.15458e+07	1.00099e+07	9.03571e+06	9.73459e+06	1.19496e+07	1.13915e+07	1.2153e+07	1.22862e+07
(2S,3S,4S,5R,6R)-6-(3-benzoyloxy-2-hydroxy-propoxy)-3,4,5-trihydroxy-tetrahydropyran-2-carboxylic acid	3.88	level1			371.099	165.1	NEG	1.67966e+07	9.52547e+06	1.19556e+07	1.05713e+07	2.18438e+07	1.48299e+07	1.78667e+07	9.03881e+06	1.7836e+07	2.26497e+07	1.59742e+07	4.12249e+06	3.24208e+07	2.40711e+07	2.80595e+07	3.26393e+07	3.55051e+07	2.81392e+07	1.95918e+07	1.74517e+07	1.33814e+07	2.34889e+07	2.23857e+07	2.34172e+07	2.19494e+07	2.11089e+07	2.18379e+07	2.04451e+07
(E)-5-hydroxy-N-[3-[5-[3-[[(E)-5-hydroxy-3-methyl-pent-2-enoyl]amino]propyl]-3,6-dioxo-piperazin-2-yl]propyl]-3-methyl-pent-2-enamide	3.88	level1			453.272	155.7	POS	3.30107e+06	3.38067e+06	4.92622e+06	3.07172e+06	4.31198e+06	5.51343e+06	6.79835e+06	8.65299e+06	6.11139e+06	1.10051e+07	3.63601e+06	1.48655e+07	7.02458e+06	5.49617e+06	5.21208e+06	6.6895e+06	7.24007e+06	6.01637e+06	7.34593e+06	7.40049e+06	1.07066e+07	1.25779e+07	7.85408e+06	1.08713e+07	6.77108e+06	7.06943e+06	6.82956e+06	7.23235e+06
Scopolin	3.88	level1			353.088	151.2	NEG	8.31405e+07	1.026e+08	8.4102e+07	8.10983e+07	1.15115e+08	8.66401e+07	1.73438e+08	1.13405e+08	2.00323e+08	1.30294e+08	1.38496e+08	8.6461e+07	1.81795e+08	1.34233e+08	1.57142e+08	1.38279e+08	1.38711e+08	1.29782e+08	1.25475e+08	1.41214e+08	1.42931e+08	1.44306e+08	1.3668e+08	1.24044e+08	1.30836e+08	1.28429e+08	1.27906e+08	1.30573e+08
Magnolioside	3.88	level1			353.088	151.2	NEG	8.31405e+07	1.026e+08	8.4102e+07	8.10983e+07	1.15115e+08	8.66401e+07	1.73438e+08	1.13405e+08	2.00323e+08	1.30294e+08	1.38496e+08	8.6461e+07	1.81795e+08	1.34233e+08	1.57142e+08	1.38279e+08	1.38711e+08	1.29782e+08	1.25475e+08	1.41214e+08	1.42931e+08	1.44306e+08	1.3668e+08	1.24044e+08	1.30836e+08	1.28429e+08	1.27906e+08	1.30573e+08
myo-Inositol	3.88	level1			179.056	25	NEG	3.01553e+07	2.86698e+07	3.43904e+07	3.06772e+07	3.38766e+07	3.04958e+07	4.47703e+07	4.38317e+07	4.33436e+07	3.93063e+07	3.97109e+07	4.25852e+07	3.39957e+07	3.57114e+07	3.7069e+07	3.28574e+07	3.13174e+07	3.36826e+07	3.97411e+07	3.47141e+07	3.76517e+07	3.49245e+07	3.63911e+07	3.60897e+07	3.7833e+07	3.57697e+07	3.5962e+07	3.63388e+07
2-hydroxy-1',4,4'a-trimethyl-5'-oxo-4-vinyl-spiro[cyclopentane-1,6'-decalin]-1'-carboxylic acid	3.87	level1			333.208	253.3	NEG	1.49929e+07	5.06007e+07	1.6042e+07	4.68798e+07	5.23892e+07	1.52856e+07	1.5507e+07	5.96872e+07	1.35641e+07	1.66837e+07	2.06392e+07	1.58823e+07	1.36129e+07	1.0904e+07	3.74902e+07	1.38362e+07	3.29448e+07	3.17458e+07	1.40608e+07	1.30799e+07	1.21535e+07	3.44538e+07	1.5258e+07	5.3366e+07	1.34433e+07	1.45137e+07	1.66233e+07	1.42876e+07
1,10a-dihydroxy-4,4,7,11b-tetramethyl-1,2,3,4a,5,6,6a,7,11,11a-decahydronaphtho[2,1-f]benzofuran-9-one	3.87	level1			333.207	275.5	NEG	7.03912e+06	6.12847e+06	4.91848e+06	4.67488e+06	5.48102e+06	5.8471e+06	1.00723e+07	7.3085e+06	5.94002e+06	2.03692e+07	7.27314e+06	6.32194e+06	5.70702e+06	6.52387e+06	7.74611e+06	7.09525e+06	5.66384e+06	7.6853e+06	1.91106e+07	6.71957e+06	6.46012e+06	7.17354e+06	6.60919e+06	5.33371e+06	7.4084e+06	5.97214e+06	7.06166e+06	6.81557e+06
Adenine	3.87	level1			136.062	36.7	POS	5.34626e+07	6.80494e+07	6.01842e+07	6.48466e+07	6.32091e+07	6.69727e+07	5.69937e+07	7.81509e+07	5.8595e+07	7.31285e+07	5.72145e+07	5.57173e+07	8.60989e+07	6.59066e+07	6.58739e+07	9.0018e+07	8.05648e+07	7.63194e+07	4.88998e+07	6.27419e+07	5.83751e+07	5.94763e+07	6.07382e+07	5.80779e+07	7.03401e+07	6.5468e+07	6.69777e+07	6.73078e+07
3-hydroxy-5,9,13-trimethyl-14-[[3,4,5-trihydroxy-6-(hydroxymethyl)tetrahydropyran-2-yl]oxymethyl]-15-oxatetracyclo[11.2.1.01,10.04,9]hexadecane-5-carboxylic acid	3.87	level1			513.269	213.2	NEG	2.20814e+08	2.54035e+08	2.25365e+08	2.2206e+08	2.02259e+08	2.48417e+08	2.83559e+08	7.48683e+08	6.72496e+08	2.58255e+08	2.53732e+08	6.93696e+08	2.3146e+08	2.60846e+08	2.99098e+08	2.50533e+08	2.03638e+08	2.60747e+08	2.1559e+08	3.22863e+08	3.50792e+08	3.39655e+08	3.00949e+08	2.4419e+08	2.62224e+08	2.57299e+08	2.63821e+08	2.63324e+08
4-Feruloylquinic acid	3.87	level1			367.104	163.1	NEG	1.23355e+07	1.50208e+07	1.23645e+07	1.49991e+07	1.77879e+07	1.43165e+07	2.26827e+07	1.28993e+07	2.88438e+07	2.03827e+07	2.54734e+07	9.31805e+06	1.81856e+07	1.58996e+07	1.70944e+07	2.15017e+07	2.34885e+07	1.52727e+07	1.52401e+07	1.085e+07	1.0537e+07	1.11304e+07	1.038e+07	1.41736e+07	1.58651e+07	1.59644e+07	1.46508e+07	1.52939e+07
5-Hydroxyhexanoic acid	3.87	level1			131.071	108.3	NEG	4.31102e+07	4.19641e+07	4.83222e+07	4.21736e+07	2.34243e+07	4.84462e+07	2.97518e+07	5.63231e+07	4.9101e+07	5.04154e+07	4.8003e+07	5.78836e+07	2.08134e+07	3.32472e+07	3.44135e+07	1.77209e+07	2.00056e+07	1.86149e+07	3.60606e+07	3.20066e+07	3.27257e+07	3.79824e+07	4.34189e+07	4.71997e+07	4.70924e+07	4.40524e+07	4.5316e+07	4.58681e+07
D,L-Anatabine	3.87	level1			161.108	32.6	POS	5.14614e+08	4.94459e+08	2.22294e+09	5.45173e+08	4.5366e+08	5.47545e+08	4.817e+08	4.46535e+08	4.85517e+08	2.22801e+09	2.08053e+09	4.46344e+08	2.71774e+09	2.32215e+09	5.17002e+08	2.83678e+09	2.37874e+09	2.42934e+09	5.33939e+08	5.41786e+08	5.9682e+08	3.43786e+09	5.73734e+08	5.22748e+08	5.33825e+08	4.88268e+08	5.26112e+08	5.42209e+08
Cryptochlorogenic acid	3.87	level1			353.088	151.2	NEG	8.31405e+07	1.026e+08	8.4102e+07	8.10983e+07	1.15115e+08	8.66401e+07	1.73438e+08	1.13405e+08	2.00323e+08	1.30294e+08	1.38496e+08	8.6461e+07	1.81795e+08	1.34233e+08	1.57142e+08	1.38279e+08	1.38711e+08	1.29782e+08	1.25475e+08	1.41214e+08	1.42931e+08	1.44306e+08	1.3668e+08	1.24044e+08	1.30836e+08	1.28429e+08	1.27906e+08	1.30573e+08
3-Methoxybenzoic-acid	3.87	level1			151.04	359.5	NEG	1.47189e+06	1.68933e+06	1.6769e+06	1.6241e+06	2.07103e+06	1.90554e+06	2.22022e+06	1.56538e+06	1.76817e+06	1.58206e+06	1.17702e+06	1.68549e+06	1.41176e+06	1.57005e+06	934384	1.99243e+06	971034	2.17897e+06	1.23451e+06	1.59829e+06	0	1.62098e+06	1.78521e+06	1.09544e+06	338074	1.3925e+06	1.73124e+06	1.5514e+06
Prostaglandin F2alpha (PGF2a)	3.87	level1			353.233	243.8	NEG	1.78888e+08	1.47035e+08	1.76535e+08	1.39738e+08	1.57636e+08	1.89704e+08	2.33996e+08	2.30551e+08	1.85628e+08	2.25123e+08	2.38405e+08	2.39683e+08	1.42288e+08	1.27938e+08	1.39435e+08	1.31848e+08	1.3084e+08	1.24046e+08	1.37126e+08	1.53987e+08	1.51742e+08	1.42023e+08	1.68047e+08	1.55749e+08	1.68976e+08	1.65945e+08	1.68229e+08	1.72433e+08
10-Hydroxydecanoic acid	3.87	level1			187.134	212.1	NEG	5.49457e+07	4.40392e+07	5.21807e+07	4.5711e+07	4.42035e+07	6.85673e+07	8.07518e+07	6.61594e+07	7.4431e+07	5.82766e+07	7.53003e+07	9.32651e+07	4.36643e+07	4.25529e+07	4.44246e+07	4.42897e+07	4.25436e+07	4.11518e+07	6.75381e+07	7.25204e+07	8.17951e+07	5.72895e+07	6.66518e+07	6.19393e+07	6.11238e+07	6.08119e+07	5.72539e+07	5.99943e+07
Hydroxyisocaproic acid	3.87	level1			131.071	153.4	NEG	2.24037e+08	2.01867e+08	1.76377e+08	2.05645e+08	2.37805e+08	2.07269e+08	1.91592e+08	2.05988e+08	1.91564e+08	2.18109e+08	1.7422e+08	1.64742e+08	1.76009e+08	2.14959e+08	2.27362e+08	2.51693e+08	1.63687e+08	1.57173e+08	2.00217e+08	2.17414e+08	2.64871e+08	2.42255e+08	2.34595e+08	2.46754e+08	2.25579e+08	2.17036e+08	2.15081e+08	2.20295e+08
3,4-Dihydroxybenzoic acid (Protocatechuic acid)	3.87	level1			153.019	80.5	NEG	1.0432e+08	9.40448e+07	1.16149e+08	5.85625e+07	1.05423e+08	9.23516e+07	1.34449e+08	8.06177e+07	1.76259e+08	4.92848e+07	8.77759e+07	9.33503e+07	9.42129e+07	9.28269e+07	5.32867e+07	3.52408e+07	6.55668e+07	7.86927e+07	1.06262e+08	1.20891e+08	9.98406e+07	1.09261e+08	1.05871e+08	5.38949e+07	1.02563e+08	4.9892e+07	9.44692e+07	9.4001e+07
Choline	3.87	level1			104.107	24.3	POS	2.52885e+08	2.70352e+08	1.7441e+08	2.65398e+08	2.7207e+08	2.32981e+08	2.85132e+08	2.98092e+08	2.63791e+08	3.11135e+08	2.29645e+08	1.77751e+08	3.51132e+08	3.55785e+08	3.64383e+08	4.04856e+08	2.8655e+08	3.58789e+08	2.94081e+08	3.60272e+08	3.5238e+08	3.37233e+08	3.14028e+08	3.10039e+08	2.9608e+08	2.90634e+08	2.85596e+08	2.92258e+08
trans-11-Eicosenoic acid	3.87	level1			309.28	337.6	NEG	1.56746e+07	1.58978e+07	1.67714e+07	1.35937e+07	1.8127e+07	1.52353e+07	1.56332e+07	1.83067e+07	1.43075e+07	1.61108e+07	1.81887e+07	1.5411e+07	1.92275e+07	1.5819e+07	1.75132e+07	1.59358e+07	1.56794e+07	1.38562e+07	1.45754e+07	1.72263e+07	1.45572e+07	1.74668e+07	1.58809e+07	1.67737e+07	1.58495e+07	1.73743e+07	1.58718e+07	1.74259e+07
α-Cyperone	3.87	level1			219.174	278.9	POS	1.26046e+07	1.30823e+07	1.2772e+07	1.1394e+07	1.19635e+07	1.65009e+07	1.45977e+07	1.4892e+07	1.36056e+07	1.38337e+07	1.57225e+07	1.46435e+07	1.21479e+07	1.22242e+07	1.38212e+07	1.30273e+07	1.10462e+07	1.2124e+07	1.52471e+07	1.60977e+07	1.51715e+07	1.34466e+07	1.54442e+07	1.6253e+07	1.5172e+07	1.37764e+07	1.3798e+07	1.51211e+07
2-oct-7-enylpentanedioic acid	3.87	level1			241.144	240.5	NEG	2.40493e+07	2.04283e+07	1.94938e+07	1.87658e+07	1.94373e+07	2.44965e+07	2.73988e+07	2.24253e+07	2.15113e+07	2.27224e+07	2.67695e+07	2.5101e+07	2.13303e+07	1.99844e+07	2.02594e+07	1.97362e+07	2.09494e+07	1.66581e+07	2.0772e+07	2.21331e+07	2.3828e+07	2.40615e+07	2.39409e+07	2.31054e+07	2.24192e+07	2.13205e+07	2.20897e+07	2.25397e+07
4-Allylcatechol	3.87	level1			149.061	231.4	NEG	1.51831e+06	1.66933e+06	1.67645e+06	2.0563e+06	1.96416e+06	1.24796e+06	1.20881e+06	1.22395e+06	1.67822e+06	1.87656e+06	1.09903e+06	1.18516e+06	1.56588e+06	1.35981e+06	979132	883999	1.06421e+06	1.06907e+06	956974	1.40754e+06	1.51373e+06	934828	1.42588e+06	1.02739e+06	1.22413e+06	1.01802e+06	1.12953e+06	1.32782e+06
(1R,2R,5S,8R,14R,15R,16S)-16-hydroxy-8-isopropenyl-1,2,14,17,17-pentamethyl-pentacyclo[11.7.0.02,10.05,9.014,18]icosane-5,15-dicarboxylic acid	3.86	level1			485.327	268.2	NEG	2.97798e+06	2.65621e+06	2.90034e+06	2.92304e+06	2.69838e+06	2.64705e+06	5.0015e+06	3.80837e+06	4.97335e+06	3.80285e+06	4.42893e+06	5.74761e+06	2.15419e+06	3.43138e+06	2.34796e+06	2.31673e+06	2.49645e+06	2.49263e+06	4.34289e+06	3.96704e+06	5.25488e+06	3.48583e+06	3.78982e+06	3.77065e+06	3.38626e+06	3.30117e+06	2.7066e+06	3.29976e+06
Mesaconic acid	3.86	level1			129.019	41.9	NEG	2.24416e+07	4.82803e+07	1.39213e+07	1.67159e+07	2.03484e+07	2.87429e+07	4.32796e+07	1.65422e+07	4.66092e+07	1.43357e+07	3.53533e+07	2.92083e+07	5.00616e+07	6.03604e+07	6.06735e+07	6.38379e+07	4.34839e+07	5.72402e+07	4.9361e+07	5.33763e+07	6.05721e+07	5.9332e+07	4.99231e+07	5.03762e+07	5.15358e+07	4.73903e+07	3.80343e+07	3.28886e+07
3,7-Di-O-methylquercetin	3.86	level1			331.082	220.4	POS	6.6877e+07	5.93778e+07	6.60144e+07	6.38363e+07	6.58135e+07	6.77321e+07	7.90008e+07	6.69156e+07	6.54225e+07	8.15321e+07	9.16821e+07	7.10073e+07	9.48627e+07	9.00605e+07	9.23636e+07	1.01592e+08	8.99178e+07	9.61333e+07	7.05188e+07	9.95694e+07	9.97061e+07	6.84931e+07	8.28118e+07	7.20054e+07	8.27689e+07	8.04999e+07	7.88352e+07	7.92641e+07
Crotonoside	3.86	level1			284.099	42	POS	5.24801e+06	6.2368e+06	3.8976e+06	5.36402e+06	6.41673e+06	7.17675e+06	3.60662e+06	4.7336e+06	4.05793e+06	5.76198e+06	3.36344e+06	3.52886e+06	8.42416e+06	7.87043e+06	8.62878e+06	1.03023e+07	8.68081e+06	8.05094e+06	4.5693e+06	6.33164e+06	4.7327e+06	5.63807e+06	4.76764e+06	4.78066e+06	7.0793e+06	6.26972e+06	5.8618e+06	5.65887e+06
1,3,5-trihydroxy-4-[(E)-3-(3-hydroxy-4-methoxy-phenyl)prop-2-enoyl]oxy-cyclohexanecarboxylic acid	3.86	level1			367.104	163.1	NEG	1.23355e+07	1.50208e+07	1.23645e+07	1.49991e+07	1.77879e+07	1.43165e+07	2.26827e+07	1.28993e+07	2.88438e+07	2.03827e+07	2.54734e+07	9.31805e+06	1.81856e+07	1.58996e+07	1.70944e+07	2.15017e+07	2.34885e+07	1.52727e+07	1.52401e+07	1.085e+07	1.0537e+07	1.11304e+07	1.038e+07	1.41736e+07	1.58651e+07	1.59644e+07	1.46508e+07	1.52939e+07
(1R,7R,10R)-4,10,11,11-tetramethyltricyclo[5.3.1.01,5]undec-4-en-3-one	3.86	level1			219.174	278.9	POS	1.26046e+07	1.30823e+07	1.2772e+07	1.1394e+07	1.19635e+07	1.65009e+07	1.45977e+07	1.4892e+07	1.36056e+07	1.38337e+07	1.57225e+07	1.46435e+07	1.21479e+07	1.22242e+07	1.38212e+07	1.30273e+07	1.10462e+07	1.2124e+07	1.52471e+07	1.60977e+07	1.51715e+07	1.34466e+07	1.54442e+07	1.6253e+07	1.5172e+07	1.37764e+07	1.3798e+07	1.51211e+07
3-hydroxy-2-octyl-pentanedioic acid	3.86	level1			241.144	240.5	NEG	2.40493e+07	2.04283e+07	1.94938e+07	1.87658e+07	1.94373e+07	2.44965e+07	2.73988e+07	2.24253e+07	2.15113e+07	2.27224e+07	2.67695e+07	2.5101e+07	2.13303e+07	1.99844e+07	2.02594e+07	1.97362e+07	2.09494e+07	1.66581e+07	2.0772e+07	2.21331e+07	2.3828e+07	2.40615e+07	2.39409e+07	2.31054e+07	2.24192e+07	2.13205e+07	2.20897e+07	2.25397e+07
Stearic acid	3.86	level1			283.264	337.6	NEG	2.73802e+08	2.9462e+08	3.08335e+08	2.49159e+08	3.10269e+08	2.8625e+08	2.94147e+08	3.13805e+08	2.52953e+08	3.02503e+08	3.45772e+08	2.96913e+08	2.89999e+08	2.4879e+08	2.66417e+08	2.53833e+08	2.49455e+08	2.39657e+08	2.36418e+08	3.0049e+08	2.41325e+08	2.59787e+08	2.52936e+08	2.56066e+08	2.74647e+08	3.06169e+08	2.85303e+08	3.08358e+08
12(S)-HHTrE	3.86	level1			279.197	262.3	NEG	1.10974e+08	8.2787e+07	6.31465e+07	8.47158e+07	1.16555e+08	9.11285e+07	7.54141e+07	6.5922e+07	6.83955e+07	7.05751e+07	7.53455e+07	6.00337e+07	6.9319e+07	6.1579e+07	6.95366e+07	6.70206e+07	6.3576e+07	5.92953e+07	6.63951e+07	7.11392e+07	7.74249e+07	7.2864e+07	7.42868e+07	6.18319e+07	7.32276e+07	7.46167e+07	7.51804e+07	7.54064e+07
Hippuric acid	3.86	level1			178.051	138.1	NEG	5.38628e+06	5.53719e+06	4.61189e+06	6.17078e+06	5.02239e+06	4.94564e+06	5.36307e+06	6.59712e+06	5.4534e+06	6.02142e+06	5.0006e+06	8.51147e+06	2.2114e+07	2.18797e+07	2.20287e+07	1.267e+07	1.19082e+07	1.53998e+07	6.21691e+06	7.10622e+06	7.4487e+06	1.22854e+07	7.97371e+06	5.96894e+06	1.17691e+07	8.57174e+06	9.10488e+06	8.12237e+06
3-Amino-4-hydroxybenzoic acid	3.86	level1			152.035	48.1	NEG	7.91938e+06	8.87601e+06	8.76686e+06	7.47298e+06	8.18004e+06	7.34151e+06	9.27425e+06	9.66008e+06	1.13148e+07	7.66513e+06	3.06869e+06	3.89842e+06	1.04058e+07	1.13249e+07	4.4396e+06	4.14371e+06	3.80614e+06	9.4489e+06	6.75464e+06	1.07609e+07	1.05038e+07	8.79441e+06	8.42255e+06	1.01007e+07	9.46691e+06	3.1439e+06	9.66257e+06	9.19716e+06
(1R,4S,5R,9S,10R,13S)-5,9-dimethyl-14-methylene-13-[(2S,3R,4S,5S,6R)-3,4,5-trihydroxy-6-(hydroxymethyl)tetrahydropyran-2-yl]oxy-tetracyclo[11.2.1.01,10.04,9]hexadecane-5-carboxylic acid	3.86	level1			479.265	271.5	NEG	9.79711e+06	1.0575e+07	9.5296e+06	9.80114e+06	9.10587e+06	1.73561e+07	1.29451e+07	1.33559e+07	1.20703e+07	6.46606e+06	1.03046e+07	1.02432e+07	1.66895e+07	2.13792e+07	2.25588e+07	1.64473e+07	1.44596e+07	1.99911e+07	1.59355e+07	2.22657e+07	2.0803e+07	2.35433e+07	2.03942e+07	1.61832e+07	1.39637e+07	1.34719e+07	1.42589e+07	1.83881e+07
(3E,4R)-3-[2-[(1R,4aS,5R,6R,8aS)-6-hydroxy-5-(hydroxymethyl)-5,8a-dimethyl-2-methylene-decalin-1-yl]ethylidene]-4-hydroxy-tetrahydrofuran-2-one	3.86	level1			351.218	213.7	POS	1.73344e+07	1.45867e+07	1.45209e+07	1.39992e+07	1.47516e+07	1.73549e+07	1.55852e+07	1.59247e+07	1.36845e+07	1.46958e+07	1.78472e+07	1.70272e+07	1.55746e+07	1.36407e+07	1.5733e+07	1.51239e+07	1.53811e+07	1.51475e+07	1.49246e+07	1.52972e+07	1.47944e+07	1.56149e+07	1.76146e+07	1.42333e+07	1.51482e+07	1.53878e+07	1.51077e+07	1.5066e+07
Fraxinol	3.86	level1			223.06	174.8	POS	8.77852e+06	9.60163e+06	1.02795e+07	9.67362e+06	1.38103e+07	6.36044e+06	1.77877e+07	1.32358e+07	2.44091e+07	1.189e+07	1.5063e+07	9.95913e+06	6.08947e+06	8.12428e+06	1.37605e+07	4.96908e+06	8.02134e+06	7.02601e+06	7.35783e+06	1.03524e+07	7.86175e+06	7.32197e+06	8.73369e+06	8.1268e+06	1.09729e+07	9.6763e+06	9.42947e+06	1.04269e+07
5-hydroxy-2-(4-hydroxy-3-methoxy-phenyl)-7-[(2S,3R,4S,5S,6R)-3,4,5-trihydroxy-6-[[(2R,3R,4R,5R,6S)-3,4,5-trihydroxy-6-methyl-tetrahydropyran-2-yl]oxymethyl]tetrahydropyran-2-yl]oxy-chroman-4-one	3.86	level1			609.183	174.4	NEG	3.10944e+07	3.99267e+07	3.21298e+07	4.29027e+07	4.22472e+07	3.47532e+07	1.45234e+07	2.42697e+07	1.67522e+07	3.06938e+07	1.5679e+07	1.1044e+07	5.28621e+07	4.96784e+07	4.88822e+07	6.51868e+07	5.47912e+07	6.13972e+07	3.19792e+07	3.72814e+07	2.96478e+07	2.8356e+07	2.31611e+07	3.09261e+07	3.51291e+07	3.65965e+07	3.51036e+07	3.57363e+07
L-Azetidine-2-carboxylic acid	3.86	level1			84.0443	9.2	POS	8.00919e+07	7.79724e+07	4.49689e+07	4.0783e+07	4.71867e+07	7.52455e+07	7.77359e+07	4.18205e+07	4.11303e+07	3.67801e+07	3.42606e+07	3.96963e+07	7.16422e+07	4.16846e+07	7.93176e+07	7.79236e+07	8.00301e+07	3.70428e+07	4.20975e+07	4.13101e+07	4.30194e+07	8.068e+07	4.73937e+07	7.39279e+07	5.11289e+07	4.15898e+07	6.96884e+07	7.23365e+07
1,3-dihydroxy-6-(hydroxymethyl)-8-methoxy-anthracene-9,10-dione	3.85	level1			301.07	223.7	POS	6.58346e+06	7.14584e+06	8.53002e+06	8.28505e+06	7.32436e+06	8.22046e+06	2.22106e+07	8.12902e+06	1.73994e+07	2.41647e+07	3.31426e+07	1.06675e+07	8.63981e+06	7.29013e+06	7.9354e+06	7.27641e+06	6.47791e+06	6.45614e+06	5.03586e+06	7.2218e+06	6.47884e+06	5.05361e+06	5.81646e+06	5.22035e+06	1.06186e+07	1.0556e+07	1.05331e+07	1.09472e+07
4-Hydroxycinnamic acid	3.85	level1			163.04	175.7	NEG	3.99955e+08	3.91568e+08	3.68326e+08	3.78841e+08	3.84874e+08	3.87732e+08	4.11978e+08	4.47819e+08	3.99522e+08	4.0704e+08	3.76624e+08	4.00825e+08	3.58351e+08	3.24479e+08	3.59833e+08	3.4513e+08	2.93369e+08	3.03806e+08	3.89113e+08	4.55427e+08	4.73113e+08	4.12952e+08	3.63333e+08	4.03563e+08	3.9475e+08	3.84689e+08	3.97192e+08	3.88076e+08
2-Aminobutyric acid	3.85	level1			104.07	8.5	POS	8.01826e+06	8.07783e+06	4.60951e+06	8.73362e+06	1.03206e+07	5.90586e+06	5.93363e+06	5.64995e+06	5.73329e+06	5.1194e+06	6.63342e+06	8.4627e+06	5.65159e+06	4.80377e+06	1.0253e+07	4.98736e+06	6.81432e+06	7.75844e+06	7.79212e+06	3.18101e+06	6.64559e+06	5.96294e+06	8.27311e+06	6.29191e+06	1.69688e+07	1.38614e+07	5.55655e+06	4.67761e+06
cis-11-Eicosenoic acid	3.85	level1			309.28	337.6	NEG	1.56746e+07	1.58978e+07	1.67714e+07	1.35937e+07	1.8127e+07	1.52353e+07	1.56332e+07	1.83067e+07	1.43075e+07	1.61108e+07	1.81887e+07	1.5411e+07	1.92275e+07	1.5819e+07	1.75132e+07	1.59358e+07	1.56794e+07	1.38562e+07	1.45754e+07	1.72263e+07	1.45572e+07	1.74668e+07	1.58809e+07	1.67737e+07	1.58495e+07	1.73743e+07	1.58718e+07	1.74259e+07
3-amino-5-hydroxy-benzoic acid	3.85	level1			152.035	48.1	NEG	7.91938e+06	8.87601e+06	8.76686e+06	7.47298e+06	8.18004e+06	7.34151e+06	9.27425e+06	9.66008e+06	1.13148e+07	7.66513e+06	3.06869e+06	3.89842e+06	1.04058e+07	1.13249e+07	4.4396e+06	4.14371e+06	3.80614e+06	9.4489e+06	6.75464e+06	1.07609e+07	1.05038e+07	8.79441e+06	8.42255e+06	1.01007e+07	9.46691e+06	3.1439e+06	9.66257e+06	9.19716e+06
1-Methyl-6-oxo-1,6-dihydropyridine-3-carboxylic acid	3.85	level1			152.035	48.1	NEG	7.91938e+06	8.87601e+06	8.76686e+06	7.47298e+06	8.18004e+06	7.34151e+06	9.27425e+06	9.66008e+06	1.13148e+07	7.66513e+06	3.06869e+06	3.89842e+06	1.04058e+07	1.13249e+07	4.4396e+06	4.14371e+06	3.80614e+06	9.4489e+06	6.75464e+06	1.07609e+07	1.05038e+07	8.79441e+06	8.42255e+06	1.01007e+07	9.46691e+06	3.1439e+06	9.66257e+06	9.19716e+06
Phytanic acid	3.85	level1			311.295	341.6	NEG	4.06187e+07	4.20312e+07	4.15049e+07	3.15941e+07	3.67545e+07	3.58117e+07	2.61502e+07	3.73987e+07	2.68869e+07	3.5022e+07	3.08142e+07	4.27752e+07	3.48526e+07	1.97847e+07	2.26705e+07	2.41771e+07	2.59723e+07	1.59424e+07	2.05509e+07	2.20654e+07	2.24755e+07	2.63269e+07	2.22355e+07	2.69339e+07	2.68079e+07	2.98461e+07	2.93745e+07	3.1432e+07
NAE(18:2)	3.85	level1			324.29	298.7	POS	1.82987e+07	2.00224e+07	2.02439e+07	2.18916e+07	1.90199e+07	1.76643e+07	1.98039e+07	1.908e+07	2.15156e+07	2.2174e+07	1.89114e+07	1.67619e+07	1.75993e+07	1.57686e+07	1.68855e+07	1.41814e+07	1.50325e+07	1.61443e+07	1.62646e+07	1.7721e+07	1.51272e+07	1.52246e+07	1.63617e+07	1.71499e+07	1.70521e+07	1.9309e+07	1.76584e+07	2.04753e+07
13(S)-HpOTrE	3.85	level1			291.197	287.4	NEG	6.87118e+06	7.13586e+06	5.33469e+06	6.44644e+06	7.93588e+06	7.82548e+06	4.90488e+06	6.19469e+06	6.80381e+06	6.24505e+06	4.20275e+06	5.56669e+06	9.49658e+06	8.24075e+06	1.22851e+07	8.31848e+06	7.5233e+06	6.35364e+06	6.65579e+06	7.97554e+06	8.80499e+06	1.15558e+07	5.43604e+06	6.36861e+06	7.53881e+06	7.44143e+06	8.0424e+06	7.74129e+06
3-Hydroxybenzoic acid	3.85	level1			137.024	151.1	NEG	1.03922e+08	9.65274e+07	8.56523e+07	1.04726e+08	1.08148e+08	1.09319e+08	1.51881e+08	1.66347e+08	1.63063e+08	1.44018e+08	1.08424e+08	1.08265e+08	7.7489e+07	8.8555e+07	1.02717e+08	8.21458e+07	7.44152e+07	8.70493e+07	8.97875e+07	8.66357e+07	8.27472e+07	8.1231e+07	8.48817e+07	7.64042e+07	1.01774e+08	9.68521e+07	1.16777e+08	1.21358e+08
3-Methyluridine	3.85	level1			239.067	42.4	NEG	1.2647e+07	1.48253e+07	7.61637e+06	5.96061e+06	3.96546e+06	2.31916e+06	2.709e+06	1.27514e+07	1.31318e+06	1.46516e+07	6.91641e+06	2.9633e+06	9.4938e+06	2.54756e+06	3.00627e+06	3.26743e+06	5.14979e+06	2.06186e+06	7.59944e+06	2.73341e+06	3.51598e+06	4.07699e+06	2.49647e+06	4.41764e+06	7.70366e+06	1.10713e+07	9.42344e+06	2.48616e+06
Tris(2,4-di-tert-butylphenyl)phosphate	3.85	level1			663.452	321	POS	4.09116e+08	4.77133e+08	4.64314e+08	5.97192e+08	1.21118e+07	5.1294e+08	4.27909e+08	4.81695e+08	4.14103e+08	5.73234e+08	5.39344e+08	4.51767e+08	9.59491e+06	4.01295e+08	4.24322e+08	4.11448e+08	5.27753e+08	3.92792e+08	5.14155e+08	4.51303e+08	3.81174e+08	4.88638e+08	4.7525e+08	1.09524e+07	4.2227e+08	4.78595e+08	4.77685e+08	6.65315e+08
3-[(2S,3R,4R,5R,6S)-4,5-dihydroxy-6-methyl-3-[(2S,3R,4S,5S,6R)-3,4,5-trihydroxy-6-(hydroxymethyl)tetrahydropyran-2-yl]oxy-tetrahydropyran-2-yl]oxy-2-(3,4-dihydroxyphenyl)-5,7-dihydroxy-chromen-4-one	3.85	level1			609.147	182.3	NEG	1.21494e+08	9.62656e+07	7.78878e+07	7.16971e+07	1.37005e+08	1.41419e+08	1.27322e+08	6.96958e+07	1.15683e+08	8.24304e+07	8.14101e+07	9.35546e+07	1.4911e+08	1.52018e+08	1.72515e+08	1.19392e+08	1.37249e+08	1.09554e+08	8.96231e+07	9.76047e+07	7.57735e+07	6.21547e+07	7.97944e+07	8.13678e+07	1.04553e+08	1.08078e+08	1.08329e+08	1.05772e+08
5-acetyl-2-hydroxy-benzoic acid	3.85	level1			179.035	164.4	NEG	1.39483e+08	6.51778e+07	8.27943e+07	5.89387e+07	8.2304e+07	6.79671e+07	9.90291e+07	7.75985e+07	1.12281e+08	7.44561e+07	7.77878e+07	7.42271e+07	7.76653e+07	6.50573e+07	1.11202e+08	5.02371e+07	4.93172e+07	4.56879e+07	8.47233e+07	9.61403e+07	8.28841e+07	7.44801e+07	7.6788e+07	7.41437e+07	7.36602e+07	7.34021e+07	1.04843e+08	7.28203e+07
(2S)-2-amino-4-benzyloxy-4-oxo-butanoic acid	3.85	level1			224.092	136.9	POS	4.19694e+06	4.59516e+06	4.70123e+06	4.78121e+06	4.4906e+06	4.09245e+06	2.58627e+06	4.13185e+06	3.09201e+06	3.96074e+06	3.24611e+06	3.75789e+06	3.8853e+06	4.10983e+06	4.41269e+06	5.30177e+06	3.28054e+06	4.37829e+06	3.74196e+06	3.58674e+06	3.72238e+06	3.889e+06	3.13192e+06	4.74531e+06	4.72545e+06	3.87927e+06	3.13811e+06	4.25879e+06
17alpha-Hydroxypregnenolone	3.85	level1			391.249	260.9	NEG	8.10246e+06	8.43861e+06	8.76391e+06	8.36969e+06	5.79313e+06	9.18151e+06	9.09282e+06	1.04157e+07	7.78224e+06	7.88493e+06	8.87831e+06	8.9047e+06	8.03686e+06	7.84724e+06	6.13133e+06	7.71492e+06	6.85157e+06	4.693e+06	6.11542e+06	6.08881e+06	7.3343e+06	5.59696e+06	8.79163e+06	8.41136e+06	5.75246e+06	1.00792e+07	7.23486e+06	8.11544e+06
Gingerol	3.85	level1			293.176	226.7	NEG	1.35687e+07	1.20966e+07	8.45351e+06	1.15693e+07	1.31374e+07	1.40654e+07	1.49837e+07	1.25279e+07	1.43697e+07	1.41367e+07	1.30483e+07	1.1692e+07	1.06316e+07	1.02501e+07	1.12668e+07	8.95373e+06	1.09019e+07	8.52926e+06	1.00385e+07	1.20446e+07	1.22712e+07	1.06318e+07	1.33053e+07	1.43953e+07	1.17129e+07	1.19631e+07	1.19094e+07	1.16911e+07
2-(1-hydroxypropan-2-yl)-3,3,6-trimethyl-5,6-dihydro-2H-1-benzofuran-7-carbaldehyde	3.84	level1			249.149	224	NEG	1.49169e+07	1.49244e+07	1.42694e+07	1.62324e+07	1.44575e+07	2.20646e+07	1.91801e+07	1.89273e+07	1.66142e+07	1.75091e+07	1.72559e+07	1.9749e+07	1.89482e+07	1.79848e+07	1.89224e+07	1.90295e+07	1.96192e+07	1.77984e+07	2.17219e+07	2.2474e+07	2.32705e+07	2.23972e+07	2.19464e+07	2.28091e+07	1.79148e+07	1.90295e+07	1.83909e+07	1.94341e+07
Valnoctamide	3.84	level1			144.138	226.3	POS	5.01119e+06	5.33095e+06	5.18986e+06	5.67941e+06	5.27106e+06	5.0711e+06	4.36649e+06	5.14783e+06	4.3135e+06	4.14456e+06	5.2892e+06	4.88909e+06	4.66863e+06	4.20365e+06	4.76115e+06	4.12729e+06	4.33861e+06	4.60341e+06	4.06158e+06	4.67046e+06	5.08078e+06	4.47652e+06	5.88807e+06	4.68431e+06	3.25613e+06	3.24178e+06	3.66325e+06	3.29528e+06
Gentisaldehyde	3.84	level1			137.024	151.1	NEG	1.03922e+08	9.65274e+07	8.56523e+07	1.04726e+08	1.08148e+08	1.09319e+08	1.51881e+08	1.66347e+08	1.63063e+08	1.44018e+08	1.08424e+08	1.08265e+08	7.7489e+07	8.8555e+07	1.02717e+08	8.21458e+07	7.44152e+07	8.70493e+07	8.97875e+07	8.66357e+07	8.27472e+07	8.1231e+07	8.48817e+07	7.64042e+07	1.01774e+08	9.68521e+07	1.16777e+08	1.21358e+08
Mono(2-ethylhexyl) phthalate	3.84	level1			279.159	274.3	POS	3.86595e+07	5.96275e+06	3.42362e+07	7.26922e+06	6.45779e+06	5.83223e+07	1.04836e+07	9.5219e+06	1.06275e+07	9.44762e+06	9.89987e+06	9.96025e+06	2.92189e+07	9.29438e+06	7.79356e+06	2.9082e+07	1.03769e+07	3.21126e+07	1.02893e+07	9.59456e+07	2.07625e+07	3.84966e+07	7.09411e+06	7.51561e+06	1.96338e+07	1.99606e+07	1.98343e+07	2.02443e+07
Betaxolol	3.84	level1			308.222	205.8	POS	9.89559e+06	1.06152e+07	9.25225e+06	8.29376e+06	8.60185e+06	1.29117e+07	1.53427e+07	1.29366e+07	1.34528e+07	1.29853e+07	1.26805e+07	1.58294e+07	1.21508e+07	1.65847e+07	1.44652e+07	1.37363e+07	1.81697e+07	1.34407e+07	1.11267e+07	1.36445e+07	1.19268e+07	9.35516e+06	1.35974e+07	1.24708e+07	1.27723e+07	1.28563e+07	1.39944e+07	1.25078e+07
2-Aminoadipic acid	3.84	level1			160.061	27.5	NEG	1.42554e+07	1.22533e+07	9.00081e+06	1.06937e+07	1.21463e+07	1.31211e+07	1.43256e+07	1.44299e+07	1.48835e+07	1.40888e+07	1.37767e+07	1.70785e+07	1.48293e+07	1.8494e+07	1.85811e+07	1.53705e+07	1.34687e+07	1.45525e+07	2.01154e+07	2.28504e+07	2.20179e+07	2.04962e+07	1.92375e+07	1.71972e+07	1.62704e+07	1.67624e+07	1.67197e+07	1.3981e+07
Betaine aldehyde	3.84	level1			102.091	26	POS	1.49388e+07	1.50274e+07	2.59785e+07	1.85178e+07	1.50616e+07	1.23267e+07	1.06053e+07	1.72002e+07	1.97804e+07	1.56346e+07	1.91519e+07	1.26022e+07	8.20814e+06	1.48793e+07	1.00999e+07	1.14682e+07	9.68835e+06	7.52785e+06	1.55503e+07	1.38335e+07	1.45622e+07	1.75619e+07	9.07877e+06	5.02176e+06	1.63448e+07	1.2137e+07	9.40232e+06	1.46906e+07
Stachydrine	3.84	level1			144.102	25.9	POS	4.19304e+07	2.55719e+07	2.49193e+07	2.83444e+07	3.96415e+07	5.80441e+07	4.1707e+07	4.3924e+07	4.45322e+07	3.42869e+07	4.37004e+07	5.42352e+07	3.77266e+07	6.06074e+07	4.73121e+07	4.18465e+07	4.52104e+07	5.00442e+07	4.32274e+07	4.44056e+07	5.08388e+07	4.99262e+07	5.1123e+07	7.57909e+07	4.27226e+07	4.6749e+07	4.74495e+07	3.81436e+07
Diglycine	3.84	level1			131.046	23.6	NEG	6.32438e+06	1.23348e+07	6.69479e+06	1.18902e+07	1.40712e+07	5.29284e+06	4.14562e+06	4.13288e+06	3.60313e+06	8.40063e+06	3.11785e+06	3.19283e+06	5.30165e+07	3.68418e+07	3.26869e+07	6.28317e+07	5.11346e+07	6.28595e+07	8.02724e+06	1.53546e+07	1.12907e+07	7.12617e+06	5.90419e+06	2.17546e+07	1.90626e+07	1.76923e+07	1.9734e+07	2.22443e+07
3-Ureidopropionic acid	3.84	level1			131.046	23.6	NEG	6.32438e+06	1.23348e+07	6.69479e+06	1.18902e+07	1.40712e+07	5.29284e+06	4.14562e+06	4.13288e+06	3.60313e+06	8.40063e+06	3.11785e+06	3.19283e+06	5.30165e+07	3.68418e+07	3.26869e+07	6.28317e+07	5.11346e+07	6.28595e+07	8.02724e+06	1.53546e+07	1.12907e+07	7.12617e+06	5.90419e+06	2.17546e+07	1.90626e+07	1.76923e+07	1.9734e+07	2.22443e+07
(1R,5R,8S)-2,3-dihydroxy-2,10,10-trimethyltricyclo[6.3.0.01,5]undec-6-ene-6-carboxylic acid	3.84	level1			265.144	220	NEG	2.49602e+07	1.93797e+07	1.74847e+07	1.79723e+07	1.57667e+07	1.90881e+07	2.60453e+07	2.25905e+07	2.74785e+07	2.03189e+07	2.39887e+07	1.79568e+07	1.35789e+07	1.62238e+07	1.44419e+07	1.37768e+07	1.34868e+07	1.26793e+07	1.67785e+07	1.61486e+07	1.68746e+07	1.72691e+07	2.03848e+07	1.75136e+07	1.78179e+07	1.83332e+07	1.8399e+07	1.83319e+07
2-hydroxy-5-[3-(hydroxymethyl)-5-(3-hydroxypropyl)-7-methoxy-2,3-dihydro-1-benzofuran-2-yl]-3-methoxybenzoic acid	3.84	level1			403.14	183.6	NEG	2.64942e+06	4.01758e+06	7.21038e+06	4.53189e+06	5.41235e+06	4.87281e+06	7.84947e+06	8.48443e+06	3.71844e+06	6.22127e+06	8.44234e+06	3.71636e+06	3.86698e+06	1.41309e+06	1.23579e+06	1.35981e+06	4.82341e+06	1.66886e+06	0	1.49577e+06	1.36865e+06	1.70169e+06	0	0	4.66994e+06	3.20837e+06	4.93494e+06	1.61364e+06
6-hydroxy-6-(3-hydroxy-2,3-dimethyl-cyclopentyl)-2-methyl-heptanoic acid	3.84	level1			271.192	226.6	NEG	8.72125e+06	1.1618e+07	9.04595e+06	6.75901e+06	4.74302e+06	8.06366e+06	8.29385e+06	1.03166e+07	1.85692e+06	7.50773e+06	4.85895e+06	1.01663e+07	8.18335e+06	5.88407e+06	3.99219e+06	4.94761e+06	8.0156e+06	9.10019e+06	3.01656e+07	2.33557e+07	2.45456e+07	1.35465e+07	1.99483e+07	1.89153e+07	1.21655e+07	6.97002e+06	9.20546e+06	8.43992e+06
7-Hydroxydihydrobotrydial	3.84	level1			327.182	214.7	NEG	5.08999e+07	4.22796e+07	5.37008e+07	4.17213e+07	4.4569e+07	5.52879e+07	6.54878e+07	5.95279e+07	5.71974e+07	5.65251e+07	6.46249e+07	7.30492e+07	2.45094e+07	2.05145e+07	1.95462e+07	2.08265e+07	3.03054e+07	2.11343e+07	2.70894e+07	2.42123e+07	3.90989e+07	2.39469e+07	2.19595e+07	1.27938e+07	4.56604e+07	1.2576e+07	4.60645e+07	1.05341e+07
[(2S,3R,4S,5S,6R)-3,4,5-trihydroxy-6-(hydroxymethyl)oxan-2-yl] 4-prop-1-en-2-ylcyclohexene-1-carboxylate	3.84	level1			309.135	204.8	NEG	5.87628e+06	5.3358e+06	5.03403e+06	4.57794e+06	5.58974e+06	5.52843e+06	7.27298e+06	7.13438e+06	8.59093e+06	4.86674e+06	6.52113e+06	5.02879e+06	4.58399e+06	4.62089e+06	4.98157e+06	5.06826e+06	3.6513e+06	3.84836e+06	4.7588e+06	5.98836e+06	4.97181e+06	4.8002e+06	5.54696e+06	4.3371e+06	5.8087e+06	5.01689e+06	5.24762e+06	5.38478e+06
(1S,3R,4R,5R)-3-[(E)-3-[2-(3,4-dihydroxyphenyl)-7-hydroxy-3-methoxycarbonyl-2,3-dihydro-1-benzofuran-5-yl]prop-2-enoyl]oxy-1,4,5-trihydroxycyclohexane-1-carboxylic acid	3.84	level1			545.13	173.1	NEG	3.50465e+06	3.98082e+06	3.47919e+06	3.70222e+06	2.8279e+06	2.17655e+06	2.5591e+06	3.93973e+06	3.52585e+06	4.38176e+06	1.46245e+06	3.04432e+06	154699	0	751711	965702	0	1.06778e+06	1.15198e+06	1.91258e+06	1.91513e+06	1.57058e+06	1.46766e+06	1.32565e+06	2.95404e+06	3.13036e+06	2.92468e+06	2.23035e+06
(2R,3R,4S,5S,6R)-2-[(2E)-6-hydroxy-2,6-dimethyl-octa-2,7-dienoxy]-6-[[(2S,3R,4S,5S)-3,4,5-trihydroxytetrahydropyran-2-yl]oxymethyl]tetrahydropyran-3,4,5-triol	3.84	level1			445.209	171	NEG	4.17737e+07	4.85763e+07	3.83815e+07	4.25171e+07	4.43872e+07	3.75779e+07	5.54682e+07	5.63997e+07	7.11138e+07	5.08359e+07	4.83762e+07	5.18896e+07	2.88567e+07	2.79366e+07	2.75511e+07	2.48523e+07	2.63039e+07	2.33714e+07	3.28368e+07	3.55114e+07	4.56914e+07	4.40122e+07	4.85709e+07	5.23702e+07	4.32891e+07	4.38081e+07	4.52379e+07	4.39428e+07
3-Pyridol	3.84	level1			94.0299	33.4	NEG	3.41846e+07	2.94299e+07	3.23094e+07	1.09047e+07	1.31215e+07	4.05965e+07	3.10682e+07	4.46549e+07	3.14885e+07	3.10342e+07	2.64227e+07	1.8849e+07	1.11988e+07	3.47085e+07	1.37444e+07	1.28706e+07	2.20584e+07	1.08234e+07	1.83741e+07	2.00583e+07	1.6548e+07	1.87404e+07	3.38568e+07	2.55199e+07	3.08886e+07	3.58809e+07	2.98478e+07	3.43716e+07
Brevicuspisaponin 2	3.83	level1			485.327	268.2	NEG	2.97798e+06	2.65621e+06	2.90034e+06	2.92304e+06	2.69838e+06	2.64705e+06	5.0015e+06	3.80837e+06	4.97335e+06	3.80285e+06	4.42893e+06	5.74761e+06	2.15419e+06	3.43138e+06	2.34796e+06	2.31673e+06	2.49645e+06	2.49263e+06	4.34289e+06	3.96704e+06	5.25488e+06	3.48583e+06	3.78982e+06	3.77065e+06	3.38626e+06	3.30117e+06	2.7066e+06	3.29976e+06
(Z)-9,10,11-trihydroxyoctadec-12-enoic acid	3.83	level1			329.233	233.3	NEG	1.26768e+08	1.15983e+08	1.16768e+08	1.13809e+08	1.43462e+08	1.43498e+08	1.47107e+08	1.42845e+08	1.23637e+08	1.55759e+08	1.34158e+08	1.5154e+08	1.2437e+08	1.21725e+08	1.1781e+08	1.2785e+08	1.6784e+08	1.43779e+08	1.23646e+08	1.05598e+08	9.28465e+07	8.75916e+07	1.09891e+08	1.16389e+08	1.26063e+08	1.26754e+08	1.29947e+08	1.28353e+08
Tetracosanoic acid	3.83	level1			367.357	332.3	NEG	8.28209e+06	1.09095e+07	9.31512e+06	9.42985e+06	88104.1	8.82198e+06	1.0161e+07	8.73023e+06	6.96932e+06	1.04567e+07	1.1383e+07	9.73653e+06	0	1.04994e+07	8.28994e+06	9.93529e+06	9.86255e+06	1.00576e+07	8.29325e+06	8.83647e+06	8.32747e+06	1.09316e+07	9.55675e+06	35302.5	8.79586e+06	1.00906e+07	1.22418e+07	1.11697e+07
PC(16:0/16:0)	3.83	level1			714.539	321.7	NEG	5.22932e+06	3.84457e+06	3.01241e+06	5.00583e+06	3.93506e+06	5.76645e+06	5.63875e+06	4.21882e+06	5.87331e+06	4.30549e+06	7.37573e+06	3.7432e+06	3.09921e+06	3.69624e+06	3.09393e+06	3.36119e+06	2.16564e+06	3.13976e+06	3.00855e+06	4.06022e+06	4.02925e+06	4.87604e+06	5.0776e+06	4.14755e+06	6.18664e+06	9.3872e+06	8.92222e+06	8.5702e+06
9-Oxooctadecanoic acid	3.83	level1			297.244	313.1	NEG	1.79538e+09	1.95582e+09	1.59251e+09	2.11707e+09	1.85714e+09	1.74951e+09	2.07183e+09	2.19698e+09	2.23974e+09	2.42173e+09	1.69001e+09	2.19591e+09	2.72441e+09	2.57559e+09	2.73725e+09	2.42856e+09	2.44085e+09	2.57031e+09	2.11719e+09	2.46661e+09	2.47339e+09	2.34268e+09	2.49657e+09	2.05897e+09	2.15577e+09	2.36076e+09	2.21187e+09	2.34359e+09
2-[(3-oxo-3-phenyl-propyl)amino]acetic acid	3.83	level1			190.087	191.3	POS	1.29509e+06	1.47082e+06	2.06579e+06	1.72584e+06	1.43049e+06	1.71059e+06	1.56061e+06	1.66884e+06	1.65265e+06	1.66846e+06	1.74593e+06	2.21652e+06	1.59732e+06	1.43871e+06	1.34677e+06	1.4535e+06	1.67944e+06	1.29425e+06	1.3763e+06	1.8e+06	1.35374e+06	1.72419e+06	782822	1.76873e+06	1.88834e+06	1.43768e+06	1.82072e+06	1.44335e+06
Tryptophan	3.83	level1			205.097	75.2	POS	4.34459e+08	5.0335e+08	4.32847e+08	5.67296e+08	3.79977e+08	4.2838e+08	1.99638e+08	2.17799e+08	1.45746e+08	3.95701e+08	2.49415e+08	2.42632e+08	7.1512e+08	5.90319e+08	6.07523e+08	8.07146e+08	5.62884e+08	7.0583e+08	4.28822e+08	6.2208e+08	5.37609e+08	4.61684e+08	3.12295e+08	4.97404e+08	2.97937e+08	4.8373e+08	2.86082e+08	4.8107e+08
Glutamate	3.83	level1			148.06	23.5	POS	4.19457e+06	3.48281e+06	2.88587e+06	4.19857e+06	5.47817e+06	2.7002e+06	2.30684e+06	3.12946e+06	2.35255e+06	2.96894e+06	2.5868e+06	3.8596e+06	2.38139e+06	1.86093e+06	1.68043e+06	2.90174e+06	2.12282e+06	2.75316e+06	1.95189e+06	2.36248e+06	2.09185e+06	2.04799e+06	1.79777e+06	2.14645e+06	3.05931e+06	3.30393e+06	3.07633e+06	2.75934e+06
Nicotine	3.83	level1			163.123	4.3	POS	9.46251e+08	8.67101e+08	9.16563e+08	5.06124e+08	1.01802e+09	9.2995e+08	1.02165e+09	1.01126e+09	1.11824e+09	5.71786e+08	4.7761e+08	9.29538e+08	8.39237e+08	1.02809e+09	1.0026e+09	1.00144e+09	1.02965e+09	1.05945e+09	1.12075e+09	1.01486e+09	9.85877e+08	1.0462e+09	1.20818e+09	8.33979e+08	1.12206e+09	5.25152e+08	6.20964e+08	6.09373e+08
14-(hydroxymethyl)-5,9-dimethyl-tetracyclo[11.2.1.01,10.04,9]hexadecane-5-carboxylic acid	3.83	level1			319.228	249.7	NEG	1.08046e+07	1.15742e+07	1.12238e+07	8.60595e+06	1.28234e+07	1.55424e+07	1.76402e+07	1.75763e+07	9.54429e+06	2.08682e+07	1.97074e+07	1.79052e+07	1.3353e+07	1.41536e+07	1.85023e+07	1.51287e+07	1.76686e+07	1.64435e+07	8.37297e+06	1.0209e+07	1.05942e+07	1.15651e+07	1.6134e+07	1.07325e+07	1.15049e+07	1.68857e+07	1.35953e+07	1.47151e+07
(5S,9R)-14-(hydroxymethyl)-5,9-dimethyl-tetracyclo[11.2.1.01,10.04,9]hexadecane-5-carboxylic acid	3.83	level1			319.228	249.7	NEG	1.08046e+07	1.15742e+07	1.12238e+07	8.60595e+06	1.28234e+07	1.55424e+07	1.76402e+07	1.75763e+07	9.54429e+06	2.08682e+07	1.97074e+07	1.79052e+07	1.3353e+07	1.41536e+07	1.85023e+07	1.51287e+07	1.76686e+07	1.64435e+07	8.37297e+06	1.0209e+07	1.05942e+07	1.15651e+07	1.6134e+07	1.07325e+07	1.15049e+07	1.68857e+07	1.35953e+07	1.47151e+07
8-hydroxy-4-(1-hydroxy-1-methyl-ethyl)-10-oxatricyclo[7.2.1.01,5]dodec-3-ene-8-carboxylic acid	3.83	level1			281.139	167.7	NEG	1.46301e+07	1.42122e+07	2.00334e+07	1.52027e+07	1.33338e+07	1.27992e+07	3.20015e+07	2.68e+07	3.12023e+07	2.25892e+07	2.87536e+07	3.39873e+07	2.41368e+07	2.72192e+07	2.28827e+07	7.0115e+06	1.01368e+07	7.52028e+06	2.35809e+07	2.35711e+07	2.62329e+07	1.71554e+07	2.26309e+07	1.53213e+07	2.0873e+07	2.85244e+07	2.77167e+07	2.07503e+07
4,7,7-trimethyl-3-oxo-2-oxabicyclo[2.2.1]heptane-1-carboxylic acid	3.83	level1			197.082	143.6	NEG	1.12566e+07	1.11225e+07	7.60072e+06	1.12854e+07	1.39191e+07	1.09835e+07	8.9534e+06	1.09474e+07	8.5764e+06	1.0293e+07	1.09522e+07	1.41743e+07	7.97338e+06	9.46981e+06	9.10277e+06	7.13842e+06	6.53611e+06	7.12688e+06	5.30849e+06	7.86985e+06	9.39493e+06	9.77472e+06	8.52871e+06	8.40578e+06	8.96434e+06	9.0474e+06	9.65915e+06	9.19648e+06
3'-O-Methylinosine	3.83	level1			281.087	89.6	NEG	3.47961e+06	3.95863e+06	2.28845e+06	3.49186e+06	3.42641e+06	3.97558e+06	3.89588e+06	4.20888e+06	3.62775e+06	3.62848e+06	2.9182e+06	3.33359e+06	3.64648e+06	3.99796e+06	3.82576e+06	3.59746e+06	2.98368e+06	3.64297e+06	3.78488e+06	5.95641e+06	5.13388e+06	4.77191e+06	9.08719e+06	1.26368e+07	1.983e+07	3.58911e+06	7.35502e+06	4.1691e+06
Val-Ile	3.83	level1			231.17	47.8	POS	1.95841e+06	882437	4.0115e+06	8.84879e+06	9.34293e+06	2.24571e+06	382863	686608	996557	825081	340558	0	431088	0	1.09195e+06	0	0	0	1.46319e+06	959700	463923	1.31735e+06	296461	1.0374e+06	2.05001e+06	1.03798e+06	1.42951e+06	1.43775e+06
3-Hydroxycinnamic acid	3.82	level1			163.04	175.7	NEG	3.99955e+08	3.91568e+08	3.68326e+08	3.78841e+08	3.84874e+08	3.87732e+08	4.11978e+08	4.47819e+08	3.99522e+08	4.0704e+08	3.76624e+08	4.00825e+08	3.58351e+08	3.24479e+08	3.59833e+08	3.4513e+08	2.93369e+08	3.03806e+08	3.89113e+08	4.55427e+08	4.73113e+08	4.12952e+08	3.63333e+08	4.03563e+08	3.9475e+08	3.84689e+08	3.97192e+08	3.88076e+08
2-indolecarboxylic-acid	3.82	level1			160.04	194.3	NEG	5.05737e+07	5.30814e+07	4.70694e+07	5.2359e+07	5.25609e+07	5.25239e+07	6.95388e+07	8.3256e+07	7.399e+07	8.36032e+07	4.85988e+07	8.14145e+07	7.34831e+07	7.35549e+07	7.44487e+07	7.61326e+07	7.79434e+07	8.05668e+07	6.77303e+07	8.18143e+07	9.17212e+07	8.27533e+07	7.32685e+07	7.79902e+07	7.31094e+07	7.11459e+07	7.09129e+07	7.16131e+07
5-Phenylisoxazol-3-ol	3.82	level1			160.04	194.3	NEG	5.05737e+07	5.30814e+07	4.70694e+07	5.2359e+07	5.25609e+07	5.25239e+07	6.95388e+07	8.3256e+07	7.399e+07	8.36032e+07	4.85988e+07	8.14145e+07	7.34831e+07	7.35549e+07	7.44487e+07	7.61326e+07	7.79434e+07	8.05668e+07	6.77303e+07	8.18143e+07	9.17212e+07	8.27533e+07	7.32685e+07	7.79902e+07	7.31094e+07	7.11459e+07	7.09129e+07	7.16131e+07
Andrographolide	3.82	level1			351.218	213.7	POS	1.73344e+07	1.45867e+07	1.45209e+07	1.39992e+07	1.47516e+07	1.73549e+07	1.55852e+07	1.59247e+07	1.36845e+07	1.46958e+07	1.78472e+07	1.70272e+07	1.55746e+07	1.36407e+07	1.5733e+07	1.51239e+07	1.53811e+07	1.51475e+07	1.49246e+07	1.52972e+07	1.47944e+07	1.56149e+07	1.76146e+07	1.42333e+07	1.51482e+07	1.53878e+07	1.51077e+07	1.5066e+07
(1S,5R,8S,9S)-7,9-dihydroxy-2,5,9-trimethyltricyclo[6.3.0.01,5]undec-2-ene-3-carboxylic acid	3.82	level1			265.144	220	NEG	2.49602e+07	1.93797e+07	1.74847e+07	1.79723e+07	1.57667e+07	1.90881e+07	2.60453e+07	2.25905e+07	2.74785e+07	2.03189e+07	2.39887e+07	1.79568e+07	1.35789e+07	1.62238e+07	1.44419e+07	1.37768e+07	1.34868e+07	1.26793e+07	1.67785e+07	1.61486e+07	1.68746e+07	1.72691e+07	2.03848e+07	1.75136e+07	1.78179e+07	1.83332e+07	1.8399e+07	1.83319e+07
5-[(Z)-5-hydroxy-3-methyl-pent-3-enyl]-1,4a-dimethyl-6-methylene-decalin-1-carboxylic acid	3.82	level1			319.228	249.7	NEG	1.08046e+07	1.15742e+07	1.12238e+07	8.60595e+06	1.28234e+07	1.55424e+07	1.76402e+07	1.75763e+07	9.54429e+06	2.08682e+07	1.97074e+07	1.79052e+07	1.3353e+07	1.41536e+07	1.85023e+07	1.51287e+07	1.76686e+07	1.64435e+07	8.37297e+06	1.0209e+07	1.05942e+07	1.15651e+07	1.6134e+07	1.07325e+07	1.15049e+07	1.68857e+07	1.35953e+07	1.47151e+07
Salicyluric acid	3.82	level1			194.046	176.4	NEG	4.70782e+06	4.87089e+06	3.00164e+06	3.52974e+06	3.07855e+06	4.30881e+06	3.94274e+06	4.77163e+06	4.42963e+06	4.0093e+06	3.6373e+06	4.02577e+06	4.76379e+06	4.38843e+06	9.08283e+06	4.48713e+06	4.06634e+06	6.63866e+06	4.41019e+06	5.41378e+06	4.26882e+06	4.96063e+06	4.51774e+06	4.6039e+06	4.1818e+06	4.79698e+06	4.86995e+06	4.84551e+06
Anthranilic acid (Vitamin L1)	3.82	level1			136.041	170.2	NEG	1.00425e+07	6.38621e+06	7.70491e+06	6.89927e+06	7.20299e+06	1.02392e+07	1.20096e+07	8.83311e+06	1.0159e+07	8.09962e+06	7.68899e+06	8.92181e+06	1.63446e+07	1.71242e+07	1.84168e+07	1.89087e+07	1.68958e+07	2.03995e+07	1.06533e+07	1.26799e+07	1.07427e+07	1.00065e+07	1.11476e+07	1.14574e+07	1.35699e+07	1.25313e+07	1.07444e+07	1.16766e+07
3-Isopropylmalic acid	3.82	level1			175.061	89.6	NEG	1.09274e+09	7.24775e+08	6.37295e+08	7.2822e+08	1.2332e+09	1.11494e+09	7.0112e+08	8.55884e+08	5.03274e+08	7.05744e+08	4.72698e+08	8.04806e+08	6.08968e+08	6.02605e+08	5.60185e+08	1.04936e+09	7.85807e+08	6.27577e+08	7.05331e+08	5.94906e+08	4.8602e+08	5.75505e+08	4.58858e+08	5.8264e+08	6.11663e+08	8.83308e+08	6.42154e+08	6.12763e+08
Imidazol-1-yl-acetic acid	3.82	level1			127.05	46	POS	5.41892e+07	6.87571e+07	7.75708e+07	6.66104e+07	5.78984e+07	5.9213e+07	8.54736e+07	1.09588e+08	8.19238e+07	9.00952e+07	1.04105e+08	8.67072e+07	5.38346e+07	4.31007e+07	4.92616e+07	5.32941e+07	3.93694e+07	5.13648e+07	5.88113e+07	6.14742e+07	7.04511e+07	6.91185e+07	8.59317e+07	6.4238e+07	6.78333e+07	8.01754e+07	7.07794e+07	6.69269e+07
Diacetyl	3.82	level1			87.044	24.3	POS	8.66564e+06	6.63225e+06	5.07687e+06	5.11969e+06	6.01418e+06	6.67125e+06	4.10862e+06	8.95845e+06	7.26092e+06	9.91258e+06	4.66382e+06	7.0947e+06	4.57462e+06	5.5557e+06	7.95164e+06	4.27999e+06	5.01488e+06	5.93861e+06	4.56342e+06	5.18977e+06	5.08823e+06	3.84248e+06	7.35936e+06	4.16051e+06	5.32644e+06	5.9717e+06	5.851e+06	5.1946e+06
(E)-5-[(1S,8aS)-5,5,8a-trimethyl-2-methylene-decalin-1-yl]-3-(hydroxymethyl)-2-oxo-pent-3-enoic acid	3.82	level1			333.207	307.2	NEG	7.59324e+06	6.21824e+06	5.50789e+06	6.26356e+06	7.61726e+06	7.99697e+06	9.14646e+06	9.41958e+06	8.00506e+06	9.37614e+06	1.07702e+07	8.73319e+06	8.7226e+06	7.19618e+06	7.32155e+06	6.66791e+06	6.20201e+06	6.93892e+06	7.57221e+06	7.43614e+06	7.96213e+06	8.74336e+06	7.36995e+06	7.95998e+06	8.01921e+06	8.43244e+06	7.65103e+06	8.28508e+06
DL-m-Tyrosine	3.82	level1			182.081	37	POS	8.57823e+06	4.16513e+06	5.20921e+06	3.9882e+06	3.58718e+06	6.04024e+06	8.6734e+06	833596	7.50806e+06	2.1388e+06	3.83539e+06	5.2396e+06	6.35496e+06	7.20664e+06	1.41951e+07	8.22665e+06	2.08793e+07	1.40252e+07	2.25723e+06	3.67211e+06	5.71145e+06	6.61348e+06	2.36378e+06	4.93059e+06	3.69741e+06	1.08317e+07	9.96372e+06	6.57272e+06
2-(1-hydroxyethyl)-3H-quinazolin-4-one	3.82	level1			173.071	157.1	POS	7.59714e+07	6.89635e+07	7.06026e+07	7.34332e+07	7.08299e+07	7.89791e+07	9.43326e+07	9.78441e+07	1.03562e+08	8.59935e+07	8.79757e+07	7.99909e+07	1.02456e+08	8.68437e+07	9.7872e+07	1.09265e+08	9.8308e+07	9.78981e+07	7.65581e+07	7.72123e+07	9.48248e+07	9.81675e+07	8.3019e+07	7.66958e+07	8.94592e+07	8.81294e+07	9.10744e+07	8.75167e+07
N-Formylnornicotine	3.82	level1			177.102	54.1	POS	2.18244e+09	1.87387e+09	1.73572e+09	2.06602e+09	2.05675e+09	2.45918e+09	2.45879e+09	2.10832e+09	2.66418e+09	2.05597e+09	2.27628e+09	2.71432e+09	8.69661e+09	7.30062e+09	3.14515e+09	6.9173e+09	7.40616e+09	6.42504e+09	2.26567e+09	2.16225e+09	2.78132e+09	7.46032e+09	3.16133e+09	2.17034e+09	2.54637e+09	4.92263e+09	2.476e+09	2.43088e+09
(1R,2R,4aS,6aS,6bR,10R,11S,12R,12aR)-1,10,11,12-tetrahydroxy-1,2,6a,6b,9,9,12a-heptamethyl-2,3,4,5,6,6a,7,8,8a,10,11,12,13,14b-tetradecahydropicene-4a-carboxylic acid	3.81	level1			485.327	268.2	NEG	2.97798e+06	2.65621e+06	2.90034e+06	2.92304e+06	2.69838e+06	2.64705e+06	5.0015e+06	3.80837e+06	4.97335e+06	3.80285e+06	4.42893e+06	5.74761e+06	2.15419e+06	3.43138e+06	2.34796e+06	2.31673e+06	2.49645e+06	2.49263e+06	4.34289e+06	3.96704e+06	5.25488e+06	3.48583e+06	3.78982e+06	3.77065e+06	3.38626e+06	3.30117e+06	2.7066e+06	3.29976e+06
9-hydroxy-7-isopropyl-1,4a-dimethyl-2,3,4,9,10,10a-hexahydrophenanthrene-1-carboxylic acid	3.81	level1			315.197	254.3	NEG	7.87444e+06	8.0698e+06	8.24831e+06	9.07709e+06	8.77144e+06	8.73127e+06	7.5419e+06	1.16197e+07	8.4758e+06	9.20655e+06	7.22993e+06	7.47274e+06	1.25901e+07	1.43607e+07	1.74559e+07	1.22529e+07	1.27776e+07	1.56019e+07	1.36593e+07	1.49395e+07	1.53001e+07	1.40834e+07	1.61797e+07	1.38198e+07	1.127e+07	1.1747e+07	1.08699e+07	1.09534e+07
3,5,7-trihydroxy-8-methoxy-2-(4-methoxyphenyl)chromen-4-one	3.81	level1			331.082	220.4	POS	6.6877e+07	5.93778e+07	6.60144e+07	6.38363e+07	6.58135e+07	6.77321e+07	7.90008e+07	6.69156e+07	6.54225e+07	8.15321e+07	9.16821e+07	7.10073e+07	9.48627e+07	9.00605e+07	9.23636e+07	1.01592e+08	8.99178e+07	9.61333e+07	7.05188e+07	9.95694e+07	9.97061e+07	6.84931e+07	8.28118e+07	7.20054e+07	8.27689e+07	8.04999e+07	7.88352e+07	7.92641e+07
(1S,3R,4R,5R)-1,3,4-trihydroxy-5-[(E)-3-(3-hydroxy-4-methoxy-phenyl)prop-2-enoyl]oxy-cyclohexanecarboxylic acid	3.81	level1			367.104	163.1	NEG	1.23355e+07	1.50208e+07	1.23645e+07	1.49991e+07	1.77879e+07	1.43165e+07	2.26827e+07	1.28993e+07	2.88438e+07	2.03827e+07	2.54734e+07	9.31805e+06	1.81856e+07	1.58996e+07	1.70944e+07	2.15017e+07	2.34885e+07	1.52727e+07	1.52401e+07	1.085e+07	1.0537e+07	1.11304e+07	1.038e+07	1.41736e+07	1.58651e+07	1.59644e+07	1.46508e+07	1.52939e+07
11beta-Hydroxyprogesterone	3.81	level1			313.216	250.6	POS	5.3828e+06	5.78729e+06	5.02174e+06	5.00658e+06	5.43548e+06	6.61039e+06	4.76306e+06	7.36489e+06	4.91951e+06	7.59674e+06	5.9118e+06	5.04163e+06	4.92944e+06	4.30118e+06	4.91499e+06	5.00324e+06	5.76334e+06	5.1436e+06	4.71807e+06	5.38091e+06	4.32549e+06	5.72889e+06	5.34382e+06	6.60351e+06	4.97653e+06	6.85459e+06	5.96869e+06	5.54946e+06
Homoveratric acid	3.81	level1			195.066	176.4	NEG	1.15973e+07	1.01935e+07	1.30882e+07	1.03421e+07	1.20171e+07	1.10036e+07	1.47575e+07	1.24438e+07	1.98616e+07	1.78714e+07	1.34769e+07	1.13004e+07	7.92671e+06	7.89351e+06	1.0154e+07	1.19694e+07	8.26121e+06	9.39878e+06	9.00269e+06	1.0141e+07	8.38652e+06	8.28166e+06	1.10248e+07	9.88133e+06	1.09639e+07	1.16149e+07	1.09213e+07	1.70616e+07
Arachidic acid	3.81	level1			311.295	341.6	NEG	4.06187e+07	4.20312e+07	4.15049e+07	3.15941e+07	3.67545e+07	3.58117e+07	2.61502e+07	3.73987e+07	2.68869e+07	3.5022e+07	3.08142e+07	4.27752e+07	3.48526e+07	1.97847e+07	2.26705e+07	2.41771e+07	2.59723e+07	1.59424e+07	2.05509e+07	2.20654e+07	2.24755e+07	2.63269e+07	2.22355e+07	2.69339e+07	2.68079e+07	2.98461e+07	2.93745e+07	3.1432e+07
13(S)-HODE	3.81	level1			295.228	301.9	NEG	1.36589e+09	1.35129e+09	9.12643e+08	1.14592e+09	1.22996e+09	1.12908e+09	1.1209e+09	9.72571e+08	1.38892e+09	1.22549e+09	7.31165e+08	1.59516e+09	2.31472e+09	2.39623e+09	2.1257e+09	1.90473e+09	2.04368e+09	2.04179e+09	1.45978e+09	1.53363e+09	1.64423e+09	1.75289e+09	1.50198e+09	1.3323e+09	1.50221e+09	1.43519e+09	1.50232e+09	1.53932e+09
Desaminotyrosine	3.81	level1			165.056	167.7	NEG	2.53432e+08	2.54126e+08	2.06923e+08	2.76253e+08	3.05953e+08	2.58627e+08	2.00557e+08	2.36578e+08	2.06666e+08	2.47692e+08	1.66607e+08	2.02671e+08	3.13552e+08	2.78276e+08	2.98522e+08	3.36307e+08	3.0596e+08	3.10298e+08	2.18424e+08	2.56373e+08	2.42259e+08	2.65061e+08	2.06155e+08	2.06872e+08	2.60245e+08	2.57378e+08	2.54174e+08	2.49058e+08
Chlorogenic acid	3.81	level1			353.088	136.7	NEG	2.05104e+07	2.0718e+07	1.95381e+07	1.70718e+07	2.18028e+07	2.06053e+07	3.86965e+07	2.33088e+07	5.22036e+07	2.94235e+07	3.00878e+07	2.09289e+07	4.9784e+07	3.71617e+07	4.37543e+07	3.66885e+07	3.14374e+07	3.33279e+07	2.95493e+07	3.69581e+07	3.63452e+07	3.33782e+07	3.25382e+07	3.05165e+07	3.04622e+07	3.32089e+07	3.39195e+07	2.97401e+07
Nornicotine	3.81	level1			149.107	34.1	POS	1.86299e+09	2.29826e+09	5.90465e+08	1.83924e+09	1.00861e+09	8.99492e+08	1.10363e+09	1.48816e+09	1.44706e+09	1.71673e+09	1.0374e+09	1.14271e+09	1.54817e+10	1.2317e+10	1.4765e+10	1.79435e+10	1.4847e+10	1.48396e+10	3.25434e+09	4.30367e+09	3.03041e+09	3.77763e+09	4.98651e+09	8.42376e+08	5.87081e+09	5.50276e+09	5.69979e+09	5.49406e+09
Deoxyinosine	3.81	level1			251.077	28.1	NEG	7.16395e+06	7.84653e+06	8.06049e+06	6.84145e+06	6.00267e+06	7.36517e+06	9.11094e+06	1.08548e+07	9.47034e+06	1.04169e+07	8.39921e+06	9.40103e+06	1.09773e+07	1.04886e+07	1.17667e+07	9.30014e+06	7.33215e+06	1.06931e+07	1.19822e+07	1.35997e+07	1.32498e+07	1.2443e+07	1.5485e+07	1.15402e+07	9.57779e+06	1.06502e+07	1.02903e+07	9.98764e+06
2-methylcitrate	3.81	level1			205.035	25.5	NEG	1.25663e+06	1.9008e+06	1.09039e+06	1.42306e+06	1.75896e+06	1.25251e+06	1.80425e+06	1.81525e+06	2.20652e+06	1.41045e+06	1.24731e+06	2.08969e+06	3.49642e+06	3.69576e+06	3.33035e+06	2.3121e+06	2.11039e+06	2.99073e+06	2.33556e+06	3.27412e+06	4.33062e+06	3.42603e+06	2.84097e+06	2.70833e+06	2.15972e+06	2.08802e+06	1.71849e+06	2.50559e+06
2-(7,8-Dihydroxypentadecyl)-6-hydroxybenzoic acid	3.81	level1			379.249	269.5	NEG	2.12461e+07	2.50666e+07	2.19058e+07	2.50989e+07	2.35719e+07	2.42468e+07	2.28833e+07	2.88588e+07	2.76469e+07	2.66608e+07	2.50904e+07	2.41902e+07	2.42655e+07	2.46524e+07	2.79984e+07	2.51615e+07	2.10196e+07	2.4004e+07	3.18271e+07	4.7941e+07	3.33271e+07	3.22102e+07	4.40817e+07	3.11403e+07	2.8428e+07	2.71067e+07	2.6947e+07	2.68515e+07
Aphidicolin	3.81	level1			337.239	247.8	NEG	7.98905e+07	8.44104e+07	7.68467e+07	7.40005e+07	8.02577e+07	1.05437e+08	1.85141e+08	1.01254e+08	8.39735e+07	8.70631e+07	1.11206e+08	1.14722e+08	2.10791e+08	1.30859e+08	1.30492e+08	1.50022e+08	1.17754e+08	1.48677e+08	1.25764e+08	1.84702e+08	1.9973e+08	1.26638e+08	2.14688e+08	1.30348e+08	1.22116e+08	1.17601e+08	1.22175e+08	1.19007e+08
2-[(3S,3aR,5R,7aS)-3a-acetyl-3-hydroxy-7a-methyl-2,3,4,5,6,7-hexahydro-1H-inden-5-yl]prop-2-enoic acid	3.81	level1			265.144	243.1	NEG	3.40854e+07	3.84345e+07	2.48811e+07	3.75045e+07	2.88824e+07	3.12466e+07	3.24047e+07	3.01529e+07	3.90962e+07	2.74867e+07	2.48171e+07	2.85615e+07	1.354e+07	2.24578e+07	1.31524e+07	1.19528e+07	1.1367e+07	1.21167e+07	1.95092e+07	1.87235e+07	2.59525e+07	2.35075e+07	2.71174e+07	2.45783e+07	2.4889e+07	2.47373e+07	2.4473e+07	2.33069e+07
(2E)-2-hexylidene-3-methyl-butanedioic acid	3.81	level1			213.113	220.5	NEG	1.91855e+07	1.84702e+07	1.65108e+07	1.82429e+07	1.72972e+07	1.92407e+07	2.00566e+07	2.18748e+07	1.88039e+07	2.03752e+07	2.10557e+07	1.77953e+07	1.94683e+07	1.85966e+07	1.976e+07	1.90653e+07	1.99996e+07	1.6765e+07	1.68643e+07	1.97622e+07	2.1416e+07	2.14978e+07	2.3845e+07	2.59609e+07	2.07864e+07	2.01376e+07	2.05103e+07	1.94031e+07
3-benzyl-1-hydroxy-6-(1H-indol-3-ylmethyl)piperazine-2,5-dione	3.81	level1			332.139	197.6	POS	3.40158e+07	3.35411e+07	3.97682e+07	3.39765e+07	3.72972e+07	3.42222e+07	2.91627e+07	4.75603e+07	3.41552e+07	4.17586e+07	3.85501e+07	4.43282e+07	2.7336e+07	2.60469e+07	2.5787e+07	3.32835e+07	2.39035e+07	3.13432e+07	2.94154e+07	3.60112e+07	3.71701e+07	3.61494e+07	2.93719e+07	3.30383e+07	3.39485e+07	3.3979e+07	3.41431e+07	3.45068e+07
(E)-2-(3,5-dihydroxy-4,4,10,13-tetramethyl-2,3,6,7,11,12,14,15,16,17-decahydro-1H-cyclopenta[a]phenanthren-17-yl)-6-hydroxy-5,6-dimethyl-hept-4-en-3-one	3.8	level1			471.349	288	NEG	4.86048e+07	2.02592e+07	3.96875e+07	1.35083e+07	4.09613e+07	2.3516e+07	7.58807e+07	4.0478e+07	4.88869e+07	6.0181e+07	5.04378e+07	6.57543e+07	1.66318e+07	7.03966e+07	2.58966e+07	1.07223e+07	6.38486e+07	3.98523e+07	5.70331e+07	4.4554e+07	4.06063e+07	3.56041e+07	5.96572e+07	4.54884e+07	4.23947e+07	4.46036e+07	4.5919e+07	4.63455e+07
2-Aminoisobutyric acid	3.8	level1			104.07	8.5	POS	8.01826e+06	8.07783e+06	4.60951e+06	8.73362e+06	1.03206e+07	5.90586e+06	5.93363e+06	5.64995e+06	5.73329e+06	5.1194e+06	6.63342e+06	8.4627e+06	5.65159e+06	4.80377e+06	1.0253e+07	4.98736e+06	6.81432e+06	7.75844e+06	7.79212e+06	3.18101e+06	6.64559e+06	5.96294e+06	8.27311e+06	6.29191e+06	1.69688e+07	1.38614e+07	5.55655e+06	4.67761e+06
2-Hydroxyphenylacetic acid	3.8	level1			151.04	167.1	NEG	2.31364e+08	2.42315e+08	2.73217e+08	2.63397e+08	2.35319e+08	2.04656e+08	1.87903e+08	2.4846e+08	1.89439e+08	2.07411e+08	2.13917e+08	2.13307e+08	1.62534e+08	1.81564e+08	1.67635e+08	1.84674e+08	1.46382e+08	1.71472e+08	2.03481e+08	2.39863e+08	2.2282e+08	1.76976e+08	1.55897e+08	2.05158e+08	2.21195e+08	2.11881e+08	2.05032e+08	2.05806e+08
2-Hydroxyhexanoic acid	3.8	level1			131.071	153.4	NEG	2.24037e+08	2.01867e+08	1.76377e+08	2.05645e+08	2.37805e+08	2.07269e+08	1.91592e+08	2.05988e+08	1.91564e+08	2.18109e+08	1.7422e+08	1.64742e+08	1.76009e+08	2.14959e+08	2.27362e+08	2.51693e+08	1.63687e+08	1.57173e+08	2.00217e+08	2.17414e+08	2.64871e+08	2.42255e+08	2.34595e+08	2.46754e+08	2.25579e+08	2.17036e+08	2.15081e+08	2.20295e+08
cis-​9,​10-​Epoxystearic acid	3.8	level1			297.244	313.1	NEG	1.79538e+09	1.95582e+09	1.59251e+09	2.11707e+09	1.85714e+09	1.74951e+09	2.07183e+09	2.19698e+09	2.23974e+09	2.42173e+09	1.69001e+09	2.19591e+09	2.72441e+09	2.57559e+09	2.73725e+09	2.42856e+09	2.44085e+09	2.57031e+09	2.11719e+09	2.46661e+09	2.47339e+09	2.34268e+09	2.49657e+09	2.05897e+09	2.15577e+09	2.36076e+09	2.21187e+09	2.34359e+09
2,5-Di-tert-butylhydroquinone	3.8	level1			221.154	277.9	NEG	5.3284e+06	6.77939e+06	4.9253e+06	6.3088e+06	5.91159e+06	5.68354e+06	5.03893e+06	5.05929e+06	5.10317e+06	5.37266e+06	4.54876e+06	5.07666e+06	5.62384e+06	5.14721e+06	6.22595e+06	5.6774e+06	4.76057e+06	5.17947e+06	5.63838e+06	5.60323e+06	6.1188e+06	5.8208e+06	4.97189e+06	5.20578e+06	6.02051e+06	5.48072e+06	5.66736e+06	5.86309e+06
ASP3026	3.8	level1			563.296	189.3	POS	1.16149e+06	1.43054e+06	1.31637e+06	1.63455e+06	1.55116e+06	1.90867e+06	3.67824e+06	2.33048e+06	4.16516e+06	988445	2.70293e+06	2.40149e+06	1.75166e+06	1.32894e+06	1.57765e+06	1.19468e+06	1.35928e+06	2.11495e+06	2.75212e+06	1.39921e+06	3.07541e+06	1.44361e+06	2.79336e+06	1.60633e+06	1.73818e+06	1.64268e+06	741872	1.87293e+06
Ciprofloxacin	3.8	level1			332.14	179.4	POS	1.02485e+07	1.17085e+07	1.06227e+07	1.20017e+07	1.20014e+07	1.00566e+07	8.0281e+06	1.3046e+07	8.65907e+06	1.11206e+07	7.9436e+06	1.06626e+07	3.70046e+07	2.1348e+07	2.714e+07	3.79385e+07	3.00441e+07	3.18968e+07	8.54003e+06	1.15043e+07	8.48739e+06	1.54081e+07	1.002e+07	1.00133e+07	1.33205e+07	1.33275e+07	1.43182e+07	1.42579e+07
3-Methyladipic acid	3.8	level1			159.066	143.5	NEG	3.11167e+07	2.58161e+07	2.60111e+07	2.76314e+07	2.74166e+07	3.07934e+07	3.6445e+07	3.24735e+07	3.1554e+07	3.32648e+07	3.13062e+07	5.06582e+07	2.88103e+07	2.83104e+07	2.56727e+07	2.82269e+07	2.73735e+07	2.86667e+07	2.15484e+07	2.4809e+07	3.20484e+07	2.70627e+07	3.3782e+07	2.92194e+07	3.3352e+07	3.04061e+07	2.92857e+07	2.84763e+07
3,7-Dimethyluric acid	3.8	level1			195.051	43.3	NEG	4.93442e+07	4.99551e+07	4.01918e+07	5.49344e+07	5.51108e+07	5.11515e+07	6.31589e+07	6.30198e+07	8.00015e+07	5.39329e+07	5.17542e+07	4.80192e+07	8.41542e+07	1.09792e+08	1.1309e+08	9.91967e+07	4.42061e+07	9.49182e+07	9.78484e+07	1.18218e+08	1.11021e+08	9.60969e+07	1.10041e+08	1.26969e+08	5.58667e+07	6.36324e+07	6.42779e+07	7.5077e+07
Uracil	3.8	level1			113.034	42	POS	516279	1.5216e+06	1.69185e+06	692583	947087	1.12603e+06	3.59464e+06	3.7386e+06	2.38338e+06	2.98229e+06	2.4767e+06	5.81032e+06	1.10809e+06	2.36435e+06	1.59369e+06	714176	1.12355e+06	0	1.87361e+06	1.17105e+06	1.77604e+06	1.34529e+06	601084	1.65876e+06	1.87937e+06	1.64587e+06	1.52538e+06	1.05005e+06
12,15-Dihydroxy-13-methylhexadecanoic acid	3.8	level1			301.239	266.9	NEG	3.7254e+06	4.15178e+06	3.98134e+06	4.21249e+06	4.19966e+06	4.60653e+06	3.2351e+06	3.11958e+06	3.20108e+06	4.00834e+06	4.97934e+06	5.67708e+06	4.64064e+06	5.11157e+06	4.15256e+06	3.72989e+06	5.12429e+06	3.31066e+06	5.23621e+06	5.10497e+06	5.88815e+06	4.58906e+06	6.90434e+06	6.57421e+06	5.21358e+06	4.64338e+06	4.83103e+06	4.45213e+06
Mannose	3.8	level1			161.046	2.6	NEG	2.17563e+07	1.59618e+07	1.31935e+07	2.46271e+07	3.28773e+07	2.1586e+07	1.02435e+07	2.24616e+07	1.83624e+07	1.56185e+07	4.73424e+07	2.07009e+07	1.37961e+07	1.68429e+07	2.24334e+07	1.7041e+07	2.08809e+07	5.81847e+07	1.15835e+07	1.66904e+07	2.15073e+07	1.83249e+07	2.24177e+07	1.96542e+07	2.2008e+07	2.24657e+07	2.05286e+07	1.85936e+07
2,4-dihydroxy-6-(hydroxymethyl)-3-[(6-hydroxy-1,2,5,5-tetramethyl-2,3,4,4a,6,7-hexahydronaphthalen-1-yl)methyl]benzaldehyde	3.8	level1			387.221	279.4	NEG	2.45142e+07	2.74837e+07	5.25553e+07	3.16647e+07	2.76557e+07	2.53418e+07	3.16149e+07	4.72058e+07	3.77139e+07	3.58832e+07	4.03807e+07	3.59355e+07	8.76103e+06	8.52826e+06	1.05782e+07	1.12667e+07	7.45537e+06	7.50159e+06	1.09664e+07	1.98863e+07	1.93233e+07	1.14975e+07	1.19215e+07	1.72291e+07	2.26927e+07	2.3666e+07	2.38792e+07	2.38254e+07
(E)-N-[2-(4-Hydroxy-3-methoxyphenyl)ethyl]-3-[4-methoxy-3-[(2S,3R,4R,5S,6R)-3,4,5-trihydroxy-6-(hydroxymethyl)oxan-2-yl]oxyphenyl]prop-2-enamide	3.8	level1			506.203	162.3	POS	3.97092e+06	3.60677e+06	4.0572e+06	3.23641e+06	4.94394e+06	3.75135e+06	4.67227e+06	4.30044e+06	4.418e+06	4.17632e+06	5.69758e+06	4.64266e+06	3.75557e+07	1.51306e+07	1.78111e+07	3.2077e+07	1.69337e+07	1.74967e+07	2.77819e+06	3.14253e+06	2.48107e+06	2.94619e+06	2.72471e+06	2.48699e+06	6.46226e+06	6.67043e+06	6.12754e+06	6.3469e+06
2-hydroxy-3,4-dimethoxy-benzoic acid	3.8	level1			197.046	160.8	NEG	2.28768e+07	2.38786e+07	2.27821e+07	2.45043e+07	2.37589e+07	2.11039e+07	2.78361e+07	1.8331e+07	3.62635e+07	2.34747e+07	2.39774e+07	1.7364e+07	2.62382e+07	2.37978e+07	2.50878e+07	2.21309e+07	2.51135e+07	2.38575e+07	2.85922e+07	3.07587e+07	2.74866e+07	2.92663e+07	2.81748e+07	2.5647e+07	2.55867e+07	2.64912e+07	2.58011e+07	2.61934e+07
(Z)-6,9,10-trihydroxyoctadec-7-enoic acid	3.79	level1			329.233	233.3	NEG	1.26768e+08	1.15983e+08	1.16768e+08	1.13809e+08	1.43462e+08	1.43498e+08	1.47107e+08	1.42845e+08	1.23637e+08	1.55759e+08	1.34158e+08	1.5154e+08	1.2437e+08	1.21725e+08	1.1781e+08	1.2785e+08	1.6784e+08	1.43779e+08	1.23646e+08	1.05598e+08	9.28465e+07	8.75916e+07	1.09891e+08	1.16389e+08	1.26063e+08	1.26754e+08	1.29947e+08	1.28353e+08
2-Hydroxy-3-methylbutyric acid	3.79	level1			117.056	49.8	NEG	8.22107e+07	2.25922e+07	2.8851e+07	2.17882e+07	2.43475e+07	7.87739e+07	2.86036e+07	3.17299e+07	5.32714e+07	9.99167e+07	9.29308e+07	1.05118e+08	6.32241e+07	8.75677e+07	8.61931e+07	5.5595e+07	5.45445e+07	9.63011e+07	4.91303e+07	7.79759e+07	3.59347e+07	7.7999e+07	5.77376e+07	8.88131e+07	3.19901e+07	9.11012e+07	9.03787e+07	5.05074e+07
(1S,5S,8R,9S)-9-hydroxy-9-(hydroxymethyl)-2,5-dimethyltricyclo[6.3.0.01,5]undec-2-ene-3-carboxylic acid	3.79	level1			265.144	220	NEG	2.49602e+07	1.93797e+07	1.74847e+07	1.79723e+07	1.57667e+07	1.90881e+07	2.60453e+07	2.25905e+07	2.74785e+07	2.03189e+07	2.39887e+07	1.79568e+07	1.35789e+07	1.62238e+07	1.44419e+07	1.37768e+07	1.34868e+07	1.26793e+07	1.67785e+07	1.61486e+07	1.68746e+07	1.72691e+07	2.03848e+07	1.75136e+07	1.78179e+07	1.83332e+07	1.8399e+07	1.83319e+07
(E)-11-hydroxyoctadec-9-enoic acid	3.79	level1			297.244	313.1	NEG	1.79538e+09	1.95582e+09	1.59251e+09	2.11707e+09	1.85714e+09	1.74951e+09	2.07183e+09	2.19698e+09	2.23974e+09	2.42173e+09	1.69001e+09	2.19591e+09	2.72441e+09	2.57559e+09	2.73725e+09	2.42856e+09	2.44085e+09	2.57031e+09	2.11719e+09	2.46661e+09	2.47339e+09	2.34268e+09	2.49657e+09	2.05897e+09	2.15577e+09	2.36076e+09	2.21187e+09	2.34359e+09
Suberic acid	3.79	level1			173.082	182.3	NEG	5.3654e+07	5.54001e+07	4.91883e+07	4.85537e+07	4.75576e+07	6.2117e+07	7.97876e+07	7.70641e+07	7.06293e+07	6.91807e+07	7.59766e+07	6.92681e+07	4.63543e+07	4.71258e+07	4.95396e+07	4.12006e+07	6.42476e+07	3.93574e+07	6.84994e+07	5.96051e+07	6.60094e+07	5.68562e+07	7.76645e+07	8.34346e+07	6.12524e+07	6.01618e+07	6.25325e+07	6.002e+07
Phenylalanylphenylalanine	3.79	level1			313.155	169.6	POS	3.73396e+06	4.61177e+06	4.15369e+06	4.59054e+06	4.88439e+06	2.88595e+06	2.23179e+06	3.00857e+06	2.50061e+06	3.40016e+06	2.9161e+06	2.61712e+06	5.04346e+06	4.98833e+06	4.58706e+06	8.63881e+06	7.1887e+06	9.30078e+06	3.13856e+06	5.80116e+06	4.43173e+06	3.28995e+06	1.97576e+06	4.86956e+06	5.05782e+06	4.26382e+06	4.29599e+06	4.00684e+06
Hydroxyphenyllactic acid	3.79	level1			181.05	80.4	NEG	3.40302e+07	3.71094e+07	3.37914e+07	4.94908e+07	3.34459e+07	3.42783e+07	5.20277e+07	2.68325e+07	5.48035e+07	2.74678e+07	3.47207e+07	2.8941e+07	1.09088e+07	1.18986e+07	1.17406e+07	1.17729e+07	1.03558e+07	9.94075e+06	1.01501e+07	1.25308e+07	1.22279e+07	1.16438e+07	1.05956e+07	1.36621e+07	2.16325e+07	2.4124e+07	2.04607e+07	2.15515e+07
2-Aminopimelate	3.79	level1			174.077	28.2	NEG	6.23321e+07	5.6957e+07	5.53908e+07	5.37528e+07	5.54047e+07	5.6223e+07	6.85489e+07	6.66351e+07	6.40537e+07	6.83183e+07	6.40721e+07	7.75757e+07	4.92615e+07	4.9407e+07	5.44578e+07	4.43367e+07	4.80778e+07	5.04772e+07	5.82112e+07	6.0648e+07	6.46982e+07	6.0697e+07	5.84064e+07	6.07286e+07	5.79741e+07	6.18057e+07	5.99087e+07	5.63565e+07
1-[1-hydroxy-8-methoxy-3-methyl-6-[(2S,3R,4S,5S,6R)-3,4,5-trihydroxy-6-(hydroxymethyl)tetrahydropyran-2-yl]oxy-2-naphthyl]ethanone	3.79	level1			389.124	180.3	NEG	5.42954e+07	5.00422e+07	5.96578e+07	5.52632e+07	5.46175e+07	5.09708e+07	7.304e+07	6.59766e+07	7.59224e+07	5.92115e+07	7.63576e+07	6.46007e+07	3.55918e+07	3.91158e+07	3.99935e+07	3.51812e+07	3.63441e+07	4.07699e+07	3.54289e+07	4.24618e+07	3.6925e+07	3.72076e+07	3.76075e+07	3.61279e+07	4.63864e+07	5.21599e+07	5.06788e+07	5.07995e+07
2-(2-Butoxyethoxy)acetic acid	3.79	level1			175.098	167.7	NEG	7.42117e+07	6.95261e+07	7.46518e+07	7.14474e+07	7.21282e+07	7.00378e+07	8.33266e+07	9.8751e+07	8.55374e+07	8.61366e+07	7.83319e+07	9.20824e+07	7.21539e+07	6.79916e+07	7.31383e+07	7.05153e+07	6.39307e+07	6.41899e+07	8.10745e+07	8.38679e+07	9.01607e+07	8.65062e+07	8.41413e+07	8.08858e+07	8.48098e+07	8.13336e+07	7.88974e+07	7.80938e+07
Vasicinone	3.79	level1			203.082	189.1	POS	5.4521e+06	4.89707e+06	4.74943e+06	4.81355e+06	4.25593e+06	4.24373e+06	9.73827e+06	7.97722e+06	9.46387e+06	7.21125e+06	6.10288e+06	1.9944e+06	1.27038e+07	1.00245e+07	1.21698e+07	1.5203e+07	1.20517e+07	1.45392e+07	1.04088e+07	7.91106e+06	9.92106e+06	7.96492e+06	8.42092e+06	1.09724e+07	8.27173e+06	6.37638e+06	6.89496e+06	7.90909e+06
2-hexyl-3-methylene-butanedioic acid	3.78	level1			213.113	220.5	NEG	1.91855e+07	1.84702e+07	1.65108e+07	1.82429e+07	1.72972e+07	1.92407e+07	2.00566e+07	2.18748e+07	1.88039e+07	2.03752e+07	2.10557e+07	1.77953e+07	1.94683e+07	1.85966e+07	1.976e+07	1.90653e+07	1.99996e+07	1.6765e+07	1.68643e+07	1.97622e+07	2.1416e+07	2.14978e+07	2.3845e+07	2.59609e+07	2.07864e+07	2.01376e+07	2.05103e+07	1.94031e+07
Sph(t18:0)	3.78	level1			316.285	260.3	NEG	5.57184e+06	6.84451e+06	7.53475e+06	6.34347e+06	5.99193e+06	4.7991e+06	4.4071e+06	6.17388e+06	4.88053e+06	5.97435e+06	4.97612e+06	6.02233e+06	6.2151e+06	4.92358e+06	4.9224e+06	5.64044e+06	5.64993e+06	5.23938e+06	6.88942e+06	6.57411e+06	5.53333e+06	6.11384e+06	5.82174e+06	7.44595e+06	6.15725e+06	5.82116e+06	5.70921e+06	6.07167e+06
Rutin	3.78	level1			611.162	182.2	POS	2.6335e+07	2.0513e+07	1.58334e+07	1.57963e+07	2.9172e+07	3.15985e+07	2.72577e+07	1.56188e+07	2.54653e+07	1.76883e+07	1.65155e+07	1.86881e+07	3.40641e+07	3.38811e+07	3.93491e+07	2.74362e+07	2.8614e+07	2.60518e+07	2.03763e+07	2.15984e+07	1.55864e+07	1.48652e+07	1.83652e+07	1.87204e+07	2.24925e+07	2.309e+07	2.38446e+07	2.33882e+07
Serotonin	3.78	level1			159.092	43.3	POS	7.53856e+08	6.17122e+08	6.61581e+08	7.20789e+08	8.20502e+08	7.84031e+08	1.88661e+08	4.97318e+08	8.10109e+08	6.75382e+08	6.7413e+08	5.97921e+08	7.738e+08	7.83833e+08	3.53669e+08	4.90351e+08	2.55524e+08	7.61946e+08	7.34778e+08	6.70356e+08	6.8339e+08	7.8533e+08	1.63988e+08	6.81396e+08	7.57882e+08	6.99032e+08	7.13188e+08	7.43154e+08
2-Hydroxy-6-methoxybenzoic acid	3.78	level1			167.035	159.7	NEG	7.05286e+07	7.1293e+07	5.34807e+07	7.58542e+07	8.23986e+07	7.46063e+07	8.06457e+07	7.42794e+07	9.38059e+07	8.20836e+07	6.40273e+07	4.4437e+07	7.02501e+07	7.08972e+07	7.43291e+07	8.26534e+07	7.82913e+07	7.28654e+07	6.17453e+07	7.20808e+07	6.70868e+07	6.41702e+07	7.19111e+07	6.56835e+07	7.17493e+07	7.18011e+07	7.29706e+07	7.3913e+07
2-nonyl-1H-quinolin-4-one	3.78	level1			272.201	294.6	POS	3.60758e+07	4.12261e+07	3.46851e+07	3.94866e+07	3.40714e+07	3.69216e+07	3.67633e+07	5.45945e+07	4.07152e+07	4.75512e+07	4.20905e+07	4.21552e+07	6.94674e+07	4.98381e+07	5.5963e+07	6.45984e+07	5.88855e+07	4.65948e+07	3.58614e+07	4.6176e+07	4.18631e+07	4.32335e+07	4.44666e+07	2.95019e+07	4.64083e+07	4.61681e+07	4.83104e+07	4.745e+07
Pseudolaric Acid A	3.78	level1			387.182	227.3	NEG	4.62785e+07	7.1146e+07	6.09549e+07	4.69968e+07	7.41104e+07	5.69133e+07	7.43567e+07	4.5942e+07	6.31252e+07	7.3977e+07	5.99672e+07	3.5677e+07	3.41576e+07	1.70081e+07	2.93468e+07	1.26076e+07	9.15961e+06	1.42023e+07	4.10168e+07	4.88545e+07	4.46068e+07	3.78652e+07	3.67659e+07	3.30813e+07	4.59687e+07	4.2773e+07	4.65097e+07	4.32693e+07
methyl 1-methyl-2'-oxo-spiro[1,4a,5,5a,7,8,10,10a-octahydropyrano[3,4-f]indolizine-6,3'-indoline]-4-carboxylate	3.78	level1			369.182	173.5	POS	2.52138e+07	2.11832e+07	1.35721e+07	2.02703e+07	2.38745e+07	2.42441e+07	1.63107e+07	1.16228e+07	1.73867e+07	1.29505e+07	1.44286e+07	1.0511e+07	2.26341e+07	2.77292e+07	2.55339e+07	2.86584e+07	2.46676e+07	2.68684e+07	3.65396e+07	3.44149e+07	3.73958e+07	4.23378e+07	3.49401e+07	3.03925e+07	2.41593e+07	2.50572e+07	2.50761e+07	2.48404e+07
4-[2-[(1R,4aS,5R,8aS)-6-hydroxy-5-(hydroxymethyl)-5,8a-dimethyl-2-methylene-decalin-1-yl]ethyl]-2H-furan-5-one	3.77	level1			333.208	253.3	NEG	1.49929e+07	5.06007e+07	1.6042e+07	4.68798e+07	5.23892e+07	1.52856e+07	1.5507e+07	5.96872e+07	1.35641e+07	1.66837e+07	2.06392e+07	1.58823e+07	1.36129e+07	1.0904e+07	3.74902e+07	1.38362e+07	3.29448e+07	3.17458e+07	1.40608e+07	1.30799e+07	1.21535e+07	3.44538e+07	1.5258e+07	5.3366e+07	1.34433e+07	1.45137e+07	1.66233e+07	1.42876e+07
2-(3,4-dihydroxyphenyl)-5-hydroxy-7-methoxy-3-[(2S,3R,4S,5S,6R)-3,4,5-trihydroxy-6-[[(2R,3R,4R,5R,6S)-3,4,5-trihydroxy-6-methyl-tetrahydropyran-2-yl]oxymethyl]tetrahydropyran-2-yl]oxy-chromen-4-one	3.77	level1			623.162	187.6	NEG	2.18088e+06	1.20622e+06	1.08145e+06	850742	1.56302e+06	2.17715e+06	1.0892e+06	696679	773970	1.02388e+06	326288	777140	3.11673e+06	2.46739e+06	2.36925e+06	1.81562e+06	2.12784e+06	1.6248e+06	1.51193e+06	1.24294e+06	767483	1.02166e+06	1.63421e+06	1.47956e+06	1.21961e+06	1.61917e+06	1.38381e+06	1.74923e+06
3,5-dihydroxy-2-(3-hydroxy-4-methoxy-phenyl)-7-methoxy-chromen-4-one	3.77	level1			329.066	220.7	NEG	9.75614e+07	9.20413e+07	1.07813e+08	9.42648e+07	9.78682e+07	1.08548e+08	1.30109e+08	1.07156e+08	1.03487e+08	1.35505e+08	1.57087e+08	1.2303e+08	1.2383e+08	1.19785e+08	1.17994e+08	1.25492e+08	1.18319e+08	1.26514e+08	1.01371e+08	1.49941e+08	1.48396e+08	9.78891e+07	1.20554e+08	1.10201e+08	1.12899e+08	1.17489e+08	1.19703e+08	1.21272e+08
beta-Boswellic acid	3.77	level1			455.353	308.5	NEG	2.25912e+07	1.72823e+07	2.15989e+07	8.98277e+06	2.42631e+07	1.2752e+07	3.05349e+07	1.63486e+07	2.12819e+07	3.32762e+07	2.92006e+07	3.13421e+07	1.2092e+07	2.48989e+07	1.67841e+07	5.43504e+06	2.88969e+07	1.52289e+07	2.55763e+07	2.46628e+07	2.10573e+07	1.98096e+07	2.88752e+07	2.86641e+07	1.95461e+07	2.28382e+07	2.38344e+07	2.39211e+07
7alpha,25-Dihydroxycholesterol	3.77	level1			399.322	276.8	NEG	1.39024e+06	1.11537e+06	2.06916e+06	1.1878e+06	1.19731e+06	1.43174e+06	1.62869e+06	1.94034e+06	2.15029e+06	1.60121e+06	1.83154e+06	2.32659e+06	2.33509e+06	1.96397e+06	1.34466e+06	1.6991e+06	1.39673e+06	1.49183e+06	1.17652e+06	1.40929e+06	1.41222e+06	1.46603e+06	1.72542e+06	1.73674e+06	1.74813e+06	1.33672e+06	1.47142e+06	2.1023e+06
Terephthalic-Acid	3.77	level1			165.019	127.1	NEG	2.62863e+07	2.32255e+07	2.28168e+07	1.18714e+07	2.31853e+07	1.36499e+07	9.06442e+06	2.47769e+07	1.32249e+07	2.42822e+07	7.12057e+06	2.13948e+07	2.1565e+07	1.37277e+07	9.95441e+06	1.60262e+07	1.87457e+07	1.39354e+07	1.32332e+07	1.2659e+07	1.59585e+07	1.57774e+07	1.32377e+07	2.76232e+07	1.36906e+07	1.32901e+07	1.19817e+07	1.19208e+07
Inosine	3.77	level1			267.072	24.9	NEG	7.43682e+07	5.21262e+07	5.02419e+07	5.48613e+07	5.40958e+07	6.69824e+07	6.46242e+07	6.31223e+07	6.36989e+07	6.12113e+07	5.87064e+07	4.80145e+07	6.08048e+07	6.6875e+07	7.53808e+07	7.35105e+07	4.09411e+07	6.14336e+07	8.89799e+07	8.63151e+07	9.22934e+07	8.75428e+07	8.99601e+07	8.58201e+07	6.10622e+07	7.61222e+07	7.55686e+07	5.78997e+07
[(1S,3R,3aS,4S,8aR)-1,3-dihydroxy-3-isopropyl-6,8a-dimethyl-1,2,3a,4,5,8-hexahydroazulen-4-yl] 4-methoxybenzoate	3.77	level1			387.221	264.3	NEG	1.20965e+07	1.29526e+07	1.72512e+07	1.45892e+07	1.31617e+07	1.22487e+07	1.63412e+07	2.50846e+07	1.59009e+07	1.7551e+07	2.0086e+07	1.84215e+07	5.8135e+06	5.67104e+06	6.30195e+06	6.22815e+06	4.95505e+06	5.16879e+06	6.96532e+06	1.09494e+07	1.01662e+07	6.94324e+06	6.67041e+06	9.09301e+06	1.14858e+07	1.15771e+07	1.2181e+07	1.17113e+07
(5R,10S,13R,14R,17R)-17-[(1R,4S)-4,5-dihydroxy-1,5-dimethyl-hexyl]-4,4,10,13,14-pentamethyl-2,5,6,11,12,15,16,17-octahydro-1H-cyclopenta[a]phenanthrene-3,7-dione	3.76	level1			471.349	288	NEG	4.86048e+07	2.02592e+07	3.96875e+07	1.35083e+07	4.09613e+07	2.3516e+07	7.58807e+07	4.0478e+07	4.88869e+07	6.0181e+07	5.04378e+07	6.57543e+07	1.66318e+07	7.03966e+07	2.58966e+07	1.07223e+07	6.38486e+07	3.98523e+07	5.70331e+07	4.4554e+07	4.06063e+07	3.56041e+07	5.96572e+07	4.54884e+07	4.23947e+07	4.46036e+07	4.5919e+07	4.63455e+07
2-Isopropylmalic acid	3.76	level1			175.061	89.6	NEG	1.09274e+09	7.24775e+08	6.37295e+08	7.2822e+08	1.2332e+09	1.11494e+09	7.0112e+08	8.55884e+08	5.03274e+08	7.05744e+08	4.72698e+08	8.04806e+08	6.08968e+08	6.02605e+08	5.60185e+08	1.04936e+09	7.85807e+08	6.27577e+08	7.05331e+08	5.94906e+08	4.8602e+08	5.75505e+08	4.58858e+08	5.8264e+08	6.11663e+08	8.83308e+08	6.42154e+08	6.12763e+08
3-Cresotinic acid	3.76	level1			151.04	192.9	NEG	2.24066e+07	2.04453e+07	2.12322e+07	2.23603e+07	2.39323e+07	1.78418e+07	1.95558e+07	2.50432e+07	1.93398e+07	2.75457e+07	2.24247e+07	1.92701e+07	1.76923e+07	1.47e+07	1.53529e+07	1.53471e+07	1.94651e+07	1.4918e+07	1.5005e+07	1.65006e+07	1.73631e+07	1.27617e+07	1.67914e+07	2.14406e+07	2.06879e+07	1.89695e+07	1.95774e+07	1.78895e+07
Syringaldehyde	3.76	level1			181.05	150.3	NEG	6.94634e+06	2.86905e+06	5.87825e+06	3.07674e+06	3.86098e+06	5.17603e+06	6.03704e+06	5.27304e+06	6.2399e+06	5.83731e+06	5.17116e+06	6.92807e+06	4.59338e+06	5.70864e+06	2.0677e+06	3.20527e+06	5.82457e+06	3.08206e+06	2.45087e+06	5.14598e+06	6.50741e+06	4.67128e+06	5.59283e+06	5.00528e+06	6.59229e+06	5.96498e+06	5.12125e+06	3.84724e+06
Thymidine	3.76	level1			241.083	44.6	NEG	1.3594e+08	1.48268e+08	1.80109e+08	1.52814e+08	1.43598e+08	1.27988e+08	1.67905e+08	2.14709e+08	1.62535e+08	1.8626e+08	1.9351e+08	1.70144e+08	1.08559e+08	9.07951e+07	1.15263e+08	1.12686e+08	8.79361e+07	9.83297e+07	1.32305e+08	1.5696e+08	1.66809e+08	1.48402e+08	1.61416e+08	1.5053e+08	1.54449e+08	1.49426e+08	1.59254e+08	1.43218e+08
2,2'-Iminodiacetic acid	3.76	level1			132.03	44.3	NEG	2.11364e+08	2.22636e+08	2.29271e+08	1.24965e+08	2.22252e+08	1.10624e+08	1.19705e+08	1.99148e+08	1.34077e+08	1.78329e+08	1.70364e+08	1.43353e+08	1.28342e+08	2.4794e+08	3.73955e+08	1.51782e+08	1.69367e+08	2.39447e+08	2.26146e+08	4.69706e+08	3.99639e+08	2.30935e+08	1.86432e+08	1.64674e+08	2.02804e+08	2.25234e+08	2.06042e+08	2.128e+08
Kojic acid	3.76	level1			143.034	15.1	POS	2.38881e+07	1.94444e+07	1.97306e+07	2.65046e+07	2.64736e+07	2.32416e+07	2.26911e+07	2.10025e+07	2.44199e+07	2.03658e+07	2.30506e+07	2.00035e+07	1.88629e+07	2.00057e+07	2.66268e+07	2.13983e+07	2.03228e+07	2.58563e+07	2.57315e+07	2.06702e+07	2.62135e+07	2.22e+07	2.66318e+07	2.47231e+07	2.84414e+07	2.40463e+07	2.13264e+07	1.86641e+07
Isoproterenol	3.76	level1			194.118	10.3	POS	4.20024e+06	4.87554e+06	5.13065e+06	4.7851e+06	5.1235e+06	9.48769e+06	5.25726e+06	5.15514e+06	4.88598e+06	4.56823e+06	9.51224e+06	5.41017e+06	5.15735e+06	4.62567e+06	5.02508e+06	5.27531e+06	5.62875e+06	9.61542e+06	4.93653e+06	9.34214e+06	5.0462e+06	5.59854e+06	4.80385e+06	4.48606e+06	5.40713e+06	9.3544e+06	5.25829e+06	9.55604e+06
(2E,4E)-1-(2,4-dihydroxy-3,5-dimethyl-phenyl)hexa-2,4-dien-1-one	3.76	level1			231.103	235.9	NEG	1.00485e+07	1.07382e+07	1.45166e+07	1.42931e+07	1.27365e+07	1.16481e+07	4.36079e+07	3.57935e+07	4.84981e+07	3.50935e+07	3.18277e+07	2.42527e+07	1.46238e+07	1.64702e+07	1.86593e+07	1.17279e+07	1.88464e+07	1.0547e+07	1.51838e+07	1.17088e+07	1.26685e+07	1.09579e+07	1.73597e+07	3.00651e+07	1.87246e+07	1.91217e+07	2.3626e+07	1.9752e+07
6,8-dihydroxy-3-[(E)-6-hydroxyhept-1-enyl]isochromen-1-one	3.76	level1			289.108	205	NEG	5.3998e+06	4.7352e+06	4.53153e+06	4.57794e+06	2.93889e+06	7.69934e+06	1.21195e+07	4.04232e+06	1.48232e+07	4.83115e+06	7.29172e+06	5.7628e+06	6.14921e+06	1.01696e+07	9.71003e+06	6.53179e+06	5.44671e+06	5.74036e+06	1.54402e+07	1.5252e+07	1.61907e+07	1.78223e+07	1.44522e+07	1.10393e+07	1.00635e+07	9.61471e+06	9.567e+06	1.02795e+07
2-[(1R,2R)-3-oxo-2-[(Z)-5-sulfooxypent-2-enyl]cyclopentyl]acetic acid	3.76	level1			305.069	163.1	NEG	1.90483e+07	1.87389e+07	1.54569e+07	1.55358e+07	1.8279e+07	2.44858e+07	1.68573e+07	1.42824e+07	1.73259e+07	1.04492e+07	1.57674e+07	1.82311e+07	1.98355e+07	1.67815e+07	1.85304e+07	1.47377e+07	1.82104e+07	1.46575e+07	1.01222e+07	1.67388e+07	2.00075e+07	1.13619e+07	1.24535e+07	1.4302e+07	1.63233e+07	1.71361e+07	1.644e+07	1.76835e+07
Xylobiose	3.76	level1			281.088	41.4	NEG	1.43494e+07	1.36297e+07	1.28743e+07	1.37492e+07	1.45024e+07	1.57523e+07	1.83218e+07	1.79498e+07	1.86088e+07	1.41698e+07	1.38692e+07	1.62035e+07	1.19418e+07	1.55386e+07	1.67836e+07	1.37671e+07	1.01742e+07	1.03025e+07	1.61493e+07	2.37532e+07	2.21141e+07	2.04461e+07	4.68692e+07	1.52199e+07	1.80616e+07	1.77856e+07	1.81129e+07	1.75432e+07
5-(4-carboxy-3-methyl-butyl)-1,4a-dimethyl-6-methylene-decalin-1-carboxylic acid	3.76	level1			335.224	245.7	NEG	3.18327e+07	3.1348e+07	3.01945e+07	2.6214e+07	2.88576e+07	3.68739e+07	4.98951e+07	4.04503e+07	3.9208e+07	3.81457e+07	4.40433e+07	4.41079e+07	3.27612e+07	5.17462e+07	4.11954e+07	5.56764e+07	2.91204e+07	4.92065e+07	5.02759e+07	3.21406e+07	5.636e+07	2.71327e+07	3.54497e+07	3.49058e+07	4.10374e+07	7.53451e+07	6.10492e+07	3.91805e+07
1,7,7-trimethyl-5-[(2R,3R,4S,5S,6R)-3,4,5-trihydroxy-6-(hydroxymethyl)oxan-2-yl]oxybicyclo[2.2.1]heptan-2-one	3.76	level1			311.15	191.6	NEG	2.04294e+07	2.11819e+07	2.21625e+07	2.28435e+07	2.06452e+07	2.08399e+07	1.9238e+07	2.20874e+07	2.08658e+07	2.06166e+07	2.14331e+07	1.41866e+07	9.37684e+06	1.05418e+07	9.94112e+06	1.1443e+07	1.02499e+07	9.11068e+06	1.25746e+07	1.53421e+07	1.34441e+07	2.76658e+07	1.56559e+07	1.43529e+07	1.5924e+07	1.56605e+07	1.73671e+07	3.19393e+07
2-(1-hydroxy-1-methyl-ethyl)-4-methoxy-7-[[(2R,3R,4S,5S,6R)-3,4,5-trihydroxy-6-(hydroxymethyl)tetrahydropyran-2-yl]oxymethyl]-2,3-dihydrofuro[3,2-g]chromen-5-one	3.76	level1			467.159	169.7	NEG	2.18561e+07	1.48548e+07	1.45542e+07	1.51878e+07	1.71291e+07	2.42884e+07	1.4906e+07	1.49445e+07	3.87574e+06	1.09462e+07	1.67055e+07	1.477e+07	2.00868e+07	1.59647e+07	1.8346e+07	2.15967e+07	1.71038e+07	1.80986e+07	1.57148e+07	2.2941e+07	2.23075e+07	1.94015e+07	2.08698e+07	1.72663e+07	1.91477e+07	1.78471e+07	1.83213e+07	1.80712e+07
(1R,2R,6R,9R)-2,11,11-trimethyl-3-oxo-tricyclo[4.3.2.01,5]undecane-9-carboxylic acid	3.75	level1			249.149	224	NEG	1.49169e+07	1.49244e+07	1.42694e+07	1.62324e+07	1.44575e+07	2.20646e+07	1.91801e+07	1.89273e+07	1.66142e+07	1.75091e+07	1.72559e+07	1.9749e+07	1.89482e+07	1.79848e+07	1.89224e+07	1.90295e+07	1.96192e+07	1.77984e+07	2.17219e+07	2.2474e+07	2.32705e+07	2.23972e+07	2.19464e+07	2.28091e+07	1.79148e+07	1.90295e+07	1.83909e+07	1.94341e+07
4-Aminosalicylic acid	3.75	level1			152.035	48.1	NEG	7.91938e+06	8.87601e+06	8.76686e+06	7.47298e+06	8.18004e+06	7.34151e+06	9.27425e+06	9.66008e+06	1.13148e+07	7.66513e+06	3.06869e+06	3.89842e+06	1.04058e+07	1.13249e+07	4.4396e+06	4.14371e+06	3.80614e+06	9.4489e+06	6.75464e+06	1.07609e+07	1.05038e+07	8.79441e+06	8.42255e+06	1.01007e+07	9.46691e+06	3.1439e+06	9.66257e+06	9.19716e+06
4-Hydroxybenzoic acid	3.75	level1			137.024	151.1	NEG	1.03922e+08	9.65274e+07	8.56523e+07	1.04726e+08	1.08148e+08	1.09319e+08	1.51881e+08	1.66347e+08	1.63063e+08	1.44018e+08	1.08424e+08	1.08265e+08	7.7489e+07	8.8555e+07	1.02717e+08	8.21458e+07	7.44152e+07	8.70493e+07	8.97875e+07	8.66357e+07	8.27472e+07	8.1231e+07	8.48817e+07	7.64042e+07	1.01774e+08	9.68521e+07	1.16777e+08	1.21358e+08
Hoechst 33342	3.75	level1			453.238	205.3	POS	208029	1.01112e+06	1.32913e+06	972492	855241	764543	864098	1.61799e+06	1.45661e+06	2.90174e+06	2.45313e+06	1.75773e+06	933221	1.20471e+06	2.11715e+06	471027	1.28735e+06	250925	139801	211282	0	322478	255403	958163	1.19308e+06	1.03101e+06	938487	1.14156e+06
4-Vinylphenol	3.75	level1			119.05	182.3	NEG	1.80409e+07	1.65858e+07	1.81386e+07	1.71348e+07	2.2856e+07	1.88428e+07	2.54764e+07	1.37668e+07	2.77771e+07	2.64282e+07	2.22368e+07	1.22792e+07	7.15641e+06	6.45187e+06	6.95936e+06	5.07087e+06	3.81282e+06	3.30025e+06	3.86169e+06	5.37602e+06	4.87808e+06	4.29861e+06	6.14196e+06	1.09361e+07	1.30768e+07	1.37192e+07	1.25683e+07	1.18104e+07
(1aS,3aS,6aS,6bR)-2-formyl-5,5,6b-trimethyl-3a,4,6,6a-tetrahydro-1H-cyclopropa[e]indene-1a-carboxylic acid	3.75	level1			247.133	231.9	NEG	5.82362e+07	6.67849e+07	7.02917e+07	7.06819e+07	6.13673e+07	5.53e+07	5.69888e+07	6.47059e+07	8.06146e+07	6.60102e+07	5.06954e+07	6.09837e+07	2.36976e+07	3.17815e+07	2.17769e+07	1.87665e+07	2.0655e+07	1.70603e+07	2.77701e+07	3.07329e+07	3.83676e+07	3.18487e+07	3.56185e+07	5.46599e+07	5.756e+07	4.52296e+07	5.78791e+07	4.60783e+07
(10S,11R)-1,10,11-trihydroxy-9-(hydroxymethyl)-1,2,6a,6b,9,12a-hexamethyl-2,3,4,5,6,6a,7,8,8a,10,11,12,13,14b-tetradecahydropicene-4a-carboxylic acid	3.74	level1			485.327	268.2	NEG	2.97798e+06	2.65621e+06	2.90034e+06	2.92304e+06	2.69838e+06	2.64705e+06	5.0015e+06	3.80837e+06	4.97335e+06	3.80285e+06	4.42893e+06	5.74761e+06	2.15419e+06	3.43138e+06	2.34796e+06	2.31673e+06	2.49645e+06	2.49263e+06	4.34289e+06	3.96704e+06	5.25488e+06	3.48583e+06	3.78982e+06	3.77065e+06	3.38626e+06	3.30117e+06	2.7066e+06	3.29976e+06
4-Hydroxybenzaldehyde	3.74	level1			121.029	196.2	NEG	1.15731e+08	1.14456e+08	8.34214e+07	1.17699e+08	1.245e+08	1.05864e+08	1.05323e+08	1.10127e+08	9.54231e+07	1.11363e+08	7.96335e+07	1.07518e+08	1.40657e+08	1.39125e+08	1.44919e+08	1.7485e+08	1.55309e+08	1.8183e+08	9.0779e+07	9.97565e+07	1.09601e+08	1.08314e+08	9.54249e+07	1.02713e+08	1.23992e+08	1.18498e+08	1.17399e+08	1.19584e+08
3-hydroxybenzaldehyde	3.74	level1			121.029	196.2	NEG	1.15731e+08	1.14456e+08	8.34214e+07	1.17699e+08	1.245e+08	1.05864e+08	1.05323e+08	1.10127e+08	9.54231e+07	1.11363e+08	7.96335e+07	1.07518e+08	1.40657e+08	1.39125e+08	1.44919e+08	1.7485e+08	1.55309e+08	1.8183e+08	9.0779e+07	9.97565e+07	1.09601e+08	1.08314e+08	9.54249e+07	1.02713e+08	1.23992e+08	1.18498e+08	1.17399e+08	1.19584e+08
8-Hydroxycarbostyril	3.74	level1			160.04	194.3	NEG	5.05737e+07	5.30814e+07	4.70694e+07	5.2359e+07	5.25609e+07	5.25239e+07	6.95388e+07	8.3256e+07	7.399e+07	8.36032e+07	4.85988e+07	8.14145e+07	7.34831e+07	7.35549e+07	7.44487e+07	7.61326e+07	7.79434e+07	8.05668e+07	6.77303e+07	8.18143e+07	9.17212e+07	8.27533e+07	7.32685e+07	7.79902e+07	7.31094e+07	7.11459e+07	7.09129e+07	7.16131e+07
5-butyl-4-methoxy-6-methyl-pyran-2-one	3.74	level1			197.117	176.9	POS	3.0373e+08	2.81834e+08	3.74652e+08	3.02653e+08	2.727e+08	4.30559e+08	3.51314e+08	3.46841e+08	3.61625e+08	3.15076e+08	3.9102e+08	3.31985e+08	2.06731e+08	1.9295e+08	1.98283e+08	2.10252e+08	1.72357e+08	1.87851e+08	2.3527e+08	2.51969e+08	2.38354e+08	2.52537e+08	2.39093e+08	2.52157e+08	2.76855e+08	2.73057e+08	2.71341e+08	2.69803e+08
Hydroferulic acid	3.74	level1			195.066	176.4	NEG	1.15973e+07	1.01935e+07	1.30882e+07	1.03421e+07	1.20171e+07	1.10036e+07	1.47575e+07	1.24438e+07	1.98616e+07	1.78714e+07	1.34769e+07	1.13004e+07	7.92671e+06	7.89351e+06	1.0154e+07	1.19694e+07	8.26121e+06	9.39878e+06	9.00269e+06	1.0141e+07	8.38652e+06	8.28166e+06	1.10248e+07	9.88133e+06	1.09639e+07	1.16149e+07	1.09213e+07	1.70616e+07
Gentisic acid	3.74	level1			153.019	80.5	NEG	1.0432e+08	9.40448e+07	1.16149e+08	5.85625e+07	1.05423e+08	9.23516e+07	1.34449e+08	8.06177e+07	1.76259e+08	4.92848e+07	8.77759e+07	9.33503e+07	9.42129e+07	9.28269e+07	5.32867e+07	3.52408e+07	6.55668e+07	7.86927e+07	1.06262e+08	1.20891e+08	9.98406e+07	1.09261e+08	1.05871e+08	5.38949e+07	1.02563e+08	4.9892e+07	9.44692e+07	9.4001e+07
3-Phenylpropanoic acid	3.74	level1			149.061	231.4	NEG	1.51831e+06	1.66933e+06	1.67645e+06	2.0563e+06	1.96416e+06	1.24796e+06	1.20881e+06	1.22395e+06	1.67822e+06	1.87656e+06	1.09903e+06	1.18516e+06	1.56588e+06	1.35981e+06	979132	883999	1.06421e+06	1.06907e+06	956974	1.40754e+06	1.51373e+06	934828	1.42588e+06	1.02739e+06	1.22413e+06	1.01802e+06	1.12953e+06	1.32782e+06
4'-Hydroxy-3'-methylacetophenone	3.74	level1			149.061	231.4	NEG	1.51831e+06	1.66933e+06	1.67645e+06	2.0563e+06	1.96416e+06	1.24796e+06	1.20881e+06	1.22395e+06	1.67822e+06	1.87656e+06	1.09903e+06	1.18516e+06	1.56588e+06	1.35981e+06	979132	883999	1.06421e+06	1.06907e+06	956974	1.40754e+06	1.51373e+06	934828	1.42588e+06	1.02739e+06	1.22413e+06	1.01802e+06	1.12953e+06	1.32782e+06
2,6-Dimethyl-4-hydroxybenzaldehyde	3.74	level1			149.061	231.4	NEG	1.51831e+06	1.66933e+06	1.67645e+06	2.0563e+06	1.96416e+06	1.24796e+06	1.20881e+06	1.22395e+06	1.67822e+06	1.87656e+06	1.09903e+06	1.18516e+06	1.56588e+06	1.35981e+06	979132	883999	1.06421e+06	1.06907e+06	956974	1.40754e+06	1.51373e+06	934828	1.42588e+06	1.02739e+06	1.22413e+06	1.01802e+06	1.12953e+06	1.32782e+06
4′-Hydroxy-2′-methylacetophenone	3.74	level1			149.061	231.4	NEG	1.51831e+06	1.66933e+06	1.67645e+06	2.0563e+06	1.96416e+06	1.24796e+06	1.20881e+06	1.22395e+06	1.67822e+06	1.87656e+06	1.09903e+06	1.18516e+06	1.56588e+06	1.35981e+06	979132	883999	1.06421e+06	1.06907e+06	956974	1.40754e+06	1.51373e+06	934828	1.42588e+06	1.02739e+06	1.22413e+06	1.01802e+06	1.12953e+06	1.32782e+06
5-Aminosalicylic Acid	3.74	level1			152.035	48.1	NEG	7.91938e+06	8.87601e+06	8.76686e+06	7.47298e+06	8.18004e+06	7.34151e+06	9.27425e+06	9.66008e+06	1.13148e+07	7.66513e+06	3.06869e+06	3.89842e+06	1.04058e+07	1.13249e+07	4.4396e+06	4.14371e+06	3.80614e+06	9.4489e+06	6.75464e+06	1.07609e+07	1.05038e+07	8.79441e+06	8.42255e+06	1.01007e+07	9.46691e+06	3.1439e+06	9.66257e+06	9.19716e+06
Indole-3-methyl acetate	3.74	level1			190.087	191.3	POS	1.29509e+06	1.47082e+06	2.06579e+06	1.72584e+06	1.43049e+06	1.71059e+06	1.56061e+06	1.66884e+06	1.65265e+06	1.66846e+06	1.74593e+06	2.21652e+06	1.59732e+06	1.43871e+06	1.34677e+06	1.4535e+06	1.67944e+06	1.29425e+06	1.3763e+06	1.8e+06	1.35374e+06	1.72419e+06	782822	1.76873e+06	1.88834e+06	1.43768e+06	1.82072e+06	1.44335e+06
3-Amino-3-(4-hydroxyphenyl)propanoic acid	3.74	level1			182.081	37	POS	8.57823e+06	4.16513e+06	5.20921e+06	3.9882e+06	3.58718e+06	6.04024e+06	8.6734e+06	833596	7.50806e+06	2.1388e+06	3.83539e+06	5.2396e+06	6.35496e+06	7.20664e+06	1.41951e+07	8.22665e+06	2.08793e+07	1.40252e+07	2.25723e+06	3.67211e+06	5.71145e+06	6.61348e+06	2.36378e+06	4.93059e+06	3.69741e+06	1.08317e+07	9.96372e+06	6.57272e+06
Ethyl 3-hydroxybenzoate	3.74	level1			165.056	167.7	NEG	2.53432e+08	2.54126e+08	2.06923e+08	2.76253e+08	3.05953e+08	2.58627e+08	2.00557e+08	2.36578e+08	2.06666e+08	2.47692e+08	1.66607e+08	2.02671e+08	3.13552e+08	2.78276e+08	2.98522e+08	3.36307e+08	3.0596e+08	3.10298e+08	2.18424e+08	2.56373e+08	2.42259e+08	2.65061e+08	2.06155e+08	2.06872e+08	2.60245e+08	2.57378e+08	2.54174e+08	2.49058e+08
2',4',6'-Trihydroxyacetophenone	3.74	level1			167.035	159.7	NEG	7.05286e+07	7.1293e+07	5.34807e+07	7.58542e+07	8.23986e+07	7.46063e+07	8.06457e+07	7.42794e+07	9.38059e+07	8.20836e+07	6.40273e+07	4.4437e+07	7.02501e+07	7.08972e+07	7.43291e+07	8.26534e+07	7.82913e+07	7.28654e+07	6.17453e+07	7.20808e+07	6.70868e+07	6.41702e+07	7.19111e+07	6.56835e+07	7.17493e+07	7.18011e+07	7.29706e+07	7.3913e+07
3-Hydroxyphenylacetic acid	3.74	level1			151.04	192.9	NEG	2.24066e+07	2.04453e+07	2.12322e+07	2.23603e+07	2.39323e+07	1.78418e+07	1.95558e+07	2.50432e+07	1.93398e+07	2.75457e+07	2.24247e+07	1.92701e+07	1.76923e+07	1.47e+07	1.53529e+07	1.53471e+07	1.94651e+07	1.4918e+07	1.5005e+07	1.65006e+07	1.73631e+07	1.27617e+07	1.67914e+07	2.14406e+07	2.06879e+07	1.89695e+07	1.95774e+07	1.78895e+07
3',4'-Dihydroxyacetophenone	3.74	level1			151.04	192.9	NEG	2.24066e+07	2.04453e+07	2.12322e+07	2.23603e+07	2.39323e+07	1.78418e+07	1.95558e+07	2.50432e+07	1.93398e+07	2.75457e+07	2.24247e+07	1.92701e+07	1.76923e+07	1.47e+07	1.53529e+07	1.53471e+07	1.94651e+07	1.4918e+07	1.5005e+07	1.65006e+07	1.73631e+07	1.27617e+07	1.67914e+07	2.14406e+07	2.06879e+07	1.89695e+07	1.95774e+07	1.78895e+07
2,3-Dihydroxy-4-methoxyacetophenone	3.74	level1			181.05	150.3	NEG	6.94634e+06	2.86905e+06	5.87825e+06	3.07674e+06	3.86098e+06	5.17603e+06	6.03704e+06	5.27304e+06	6.2399e+06	5.83731e+06	5.17116e+06	6.92807e+06	4.59338e+06	5.70864e+06	2.0677e+06	3.20527e+06	5.82457e+06	3.08206e+06	2.45087e+06	5.14598e+06	6.50741e+06	4.67128e+06	5.59283e+06	5.00528e+06	6.59229e+06	5.96498e+06	5.12125e+06	3.84724e+06
Oleic acid	3.74	level1			281.248	354.8	NEG	1.64489e+08	1.78259e+08	1.72515e+08	1.78491e+08	1.70439e+08	1.72912e+08	1.63179e+08	2.16909e+08	1.69843e+08	1.9971e+08	1.72816e+08	1.71867e+08	1.81166e+08	1.7013e+08	2.0296e+08	1.58801e+08	1.51705e+08	1.53024e+08	1.39727e+08	1.6866e+08	1.48692e+08	1.49113e+08	1.61341e+08	1.20183e+08	1.65196e+08	1.65974e+08	1.64468e+08	1.70408e+08
trans-Vaccenic acid	3.74	level1			281.248	354.8	NEG	1.64489e+08	1.78259e+08	1.72515e+08	1.78491e+08	1.70439e+08	1.72912e+08	1.63179e+08	2.16909e+08	1.69843e+08	1.9971e+08	1.72816e+08	1.71867e+08	1.81166e+08	1.7013e+08	2.0296e+08	1.58801e+08	1.51705e+08	1.53024e+08	1.39727e+08	1.6866e+08	1.48692e+08	1.49113e+08	1.61341e+08	1.20183e+08	1.65196e+08	1.65974e+08	1.64468e+08	1.70408e+08
Tetradecyl sulfate (sodium)	3.74	level1			293.179	320.4	NEG	1.80296e+08	1.82507e+08	2.10474e+08	1.73695e+08	1.7173e+08	1.45385e+08	6.20808e+07	6.81743e+07	5.47607e+07	7.17112e+07	7.53536e+07	5.81358e+07	1.07566e+08	1.02195e+08	7.62921e+07	6.88297e+07	7.29732e+07	6.5528e+07	4.16244e+07	7.62854e+07	6.49026e+07	6.64719e+07	1.14648e+08	7.6526e+07	1.07294e+08	1.12945e+08	1.2395e+08	1.36793e+08
Zingerone	3.74	level1			193.087	239.2	NEG	1.48551e+06	2.35663e+06	2.10018e+06	1.71297e+06	2.54759e+06	1.55465e+06	2.0097e+06	2.67347e+06	2.10723e+06	1.86061e+06	4.36912e+06	2.97089e+06	1.28563e+06	2.77784e+06	1.67322e+06	1.92674e+06	2.65513e+06	1.99207e+06	1.52075e+06	3.58372e+06	2.033e+06	1.80831e+06	1.47455e+06	3.12093e+06	2.26162e+06	2.24673e+06	2.70374e+06	2.34786e+06
SCH28080	3.74	level1			258.098	181	NEG	2.29563e+07	1.93773e+07	1.85555e+07	2.17281e+07	2.35137e+07	2.13636e+07	2.02966e+07	2.09809e+07	2.16306e+07	1.95008e+07	1.88164e+07	1.49563e+07	1.41826e+07	1.47426e+07	1.36989e+07	1.47877e+07	1.27014e+07	1.48409e+07	1.5812e+07	1.58697e+07	1.52473e+07	1.61344e+07	1.51599e+07	1.76575e+07	1.75724e+07	1.76839e+07	1.80252e+07	1.79043e+07
Articaine (hydrochloride)	3.74	level1			285.123	167.6	POS	5.78085e+06	5.65094e+06	4.24243e+06	4.73014e+06	3.95261e+06	6.16916e+06	7.40022e+06	6.64394e+06	9.02028e+06	7.20336e+06	6.82464e+06	5.76991e+06	3.08676e+06	1.52195e+07	1.68666e+07	1.34492e+07	2.2995e+07	1.79978e+07	5.92972e+06	7.83431e+06	6.0511e+06	7.21458e+06	9.49662e+06	4.41023e+06	8.53551e+06	8.89741e+06	9.07802e+06	8.76867e+06
Phe-Pro	3.74	level1			263.139	157	POS	1.36818e+07	1.26236e+07	1.22209e+07	1.2305e+07	1.47991e+07	2.05229e+07	9.96911e+06	1.05487e+07	1.10429e+07	9.47563e+06	9.73296e+06	1.0747e+07	1.60361e+07	8.30968e+06	8.46377e+06	1.8516e+07	1.20467e+07	8.53217e+06	9.18324e+06	8.63702e+06	8.01552e+06	9.03131e+06	7.83986e+06	9.51307e+06	1.15433e+07	1.03179e+07	1.19182e+07	1.16322e+07
2-Methylphenol	3.74	level1			107.05	152.2	NEG	3.22451e+07	2.90685e+07	3.93428e+07	2.87512e+07	3.12747e+07	2.91209e+07	4.35005e+07	3.48241e+07	4.90349e+07	2.86131e+07	4.14604e+07	2.73311e+07	7.90756e+06	1.19596e+07	1.01912e+07	8.11519e+06	7.17854e+06	6.40489e+06	9.94126e+06	1.22875e+07	1.30136e+07	1.0672e+07	9.89094e+06	1.31414e+07	2.22387e+07	2.29781e+07	2.07479e+07	2.20629e+07
3-Cresol	3.74	level1			107.05	152.2	NEG	3.22451e+07	2.90685e+07	3.93428e+07	2.87512e+07	3.12747e+07	2.91209e+07	4.35005e+07	3.48241e+07	4.90349e+07	2.86131e+07	4.14604e+07	2.73311e+07	7.90756e+06	1.19596e+07	1.01912e+07	8.11519e+06	7.17854e+06	6.40489e+06	9.94126e+06	1.22875e+07	1.30136e+07	1.0672e+07	9.89094e+06	1.31414e+07	2.22387e+07	2.29781e+07	2.07479e+07	2.20629e+07
Nalidixic Acid	3.74	level1			215.082	151.2	POS	7.71708e+07	8.65151e+07	1.06195e+08	1.01792e+08	1.07272e+08	7.88755e+07	5.39056e+07	9.2633e+07	5.67087e+07	7.38892e+07	6.89286e+07	5.46849e+07	7.39128e+07	6.19256e+07	6.64688e+07	9.1298e+07	6.87142e+07	9.2753e+07	6.58086e+07	7.71129e+07	7.84234e+07	7.29114e+07	5.38211e+07	8.35329e+07	7.71715e+07	8.07188e+07	7.79703e+07	7.65589e+07
4-Chlorophenylalanine	3.74	level1			200.047	82.8	POS	1.00634e+08	1.02464e+08	1.017e+08	1.08392e+08	1.04531e+08	1.02208e+08	1.08964e+08	1.07981e+08	1.09388e+08	1.07403e+08	1.15275e+08	1.05281e+08	1.85409e+08	1.08493e+08	1.10118e+08	1.0882e+08	1.05255e+08	1.016e+08	1.05759e+08	1.05556e+08	1.07994e+08	1.06e+08	1.10484e+08	1.05671e+08	1.09123e+08	1.14205e+08	1.1228e+08	1.06025e+08
Leucine	3.74	level1			130.087	61	NEG	1.58959e+07	1.5448e+07	1.35461e+07	4.34489e+07	2.21529e+07	2.23761e+07	1.28135e+07	3.65743e+07	2.15842e+07	1.34513e+07	1.2752e+07	7.90372e+06	1.72838e+07	1.34699e+07	1.43436e+07	1.53777e+06	8.07938e+06	1.17049e+07	1.96155e+07	2.32031e+07	4.1269e+07	3.84514e+07	1.85025e+07	1.59153e+07	1.9416e+07	1.57834e+07	1.43612e+07	1.79368e+07
Isoleucine	3.74	level1			130.087	61	NEG	1.58959e+07	1.5448e+07	1.35461e+07	4.34489e+07	2.21529e+07	2.23761e+07	1.28135e+07	3.65743e+07	2.15842e+07	1.34513e+07	1.2752e+07	7.90372e+06	1.72838e+07	1.34699e+07	1.43436e+07	1.53777e+06	8.07938e+06	1.17049e+07	1.96155e+07	2.32031e+07	4.1269e+07	3.84514e+07	1.85025e+07	1.59153e+07	1.9416e+07	1.57834e+07	1.43612e+07	1.79368e+07
Norleucine	3.74	level1			130.087	61	NEG	1.58959e+07	1.5448e+07	1.35461e+07	4.34489e+07	2.21529e+07	2.23761e+07	1.28135e+07	3.65743e+07	2.15842e+07	1.34513e+07	1.2752e+07	7.90372e+06	1.72838e+07	1.34699e+07	1.43436e+07	1.53777e+06	8.07938e+06	1.17049e+07	1.96155e+07	2.32031e+07	4.1269e+07	3.84514e+07	1.85025e+07	1.59153e+07	1.9416e+07	1.57834e+07	1.43612e+07	1.79368e+07
Caplamin	3.74	level1			130.087	61	NEG	1.58959e+07	1.5448e+07	1.35461e+07	4.34489e+07	2.21529e+07	2.23761e+07	1.28135e+07	3.65743e+07	2.15842e+07	1.34513e+07	1.2752e+07	7.90372e+06	1.72838e+07	1.34699e+07	1.43436e+07	1.53777e+06	8.07938e+06	1.17049e+07	1.96155e+07	2.32031e+07	4.1269e+07	3.84514e+07	1.85025e+07	1.59153e+07	1.9416e+07	1.57834e+07	1.43612e+07	1.79368e+07
4-(dimethylamino)butanoate	3.74	level1			130.087	61	NEG	1.58959e+07	1.5448e+07	1.35461e+07	4.34489e+07	2.21529e+07	2.23761e+07	1.28135e+07	3.65743e+07	2.15842e+07	1.34513e+07	1.2752e+07	7.90372e+06	1.72838e+07	1.34699e+07	1.43436e+07	1.53777e+06	8.07938e+06	1.17049e+07	1.96155e+07	2.32031e+07	4.1269e+07	3.84514e+07	1.85025e+07	1.59153e+07	1.9416e+07	1.57834e+07	1.43612e+07	1.79368e+07
Cer(d18:1/4:0)	3.74	level1			368.316	322.4	NEG	1.57795e+07	1.95302e+07	1.47633e+07	2.43907e+07	1.76112e+07	1.40066e+07	1.38898e+07	1.43921e+07	1.04561e+07	2.32417e+07	1.81991e+07	1.31803e+07	1.11624e+07	1.05986e+07	1.00974e+07	9.17045e+06	1.03294e+07	1.00608e+07	8.72301e+06	1.34802e+07	1.01937e+07	8.90972e+06	9.74583e+06	1.05952e+07	1.03305e+07	1.52745e+07	1.72307e+07	1.99935e+07
21-Deoxycortisol	3.74	level1			405.228	253.6	NEG	2.93529e+06	4.50371e+06	3.30448e+06	3.20837e+06	2.05604e+06	3.12499e+06	4.19205e+06	5.05233e+06	4.30953e+06	5.12815e+06	3.712e+06	3.52032e+06	2.85134e+06	3.12864e+06	3.0933e+06	3.07945e+06	2.68637e+06	4.67249e+06	2.70165e+06	4.10988e+06	4.77132e+06	3.57035e+06	2.93234e+06	4.23942e+06	3.48171e+06	5.10433e+06	3.14623e+06	3.5571e+06
Dethiobiotin	3.74	level1			215.139	176.1	POS	1.31856e+07	1.36215e+07	1.5188e+07	1.3776e+07	1.49661e+07	1.2883e+07	1.04144e+07	1.48496e+07	1.06693e+07	1.3842e+07	1.27931e+07	1.2033e+07	8.56895e+06	7.77509e+06	8.86162e+06	7.52335e+06	7.18979e+06	7.59985e+06	9.17734e+06	1.04532e+07	9.82778e+06	9.21076e+06	8.93987e+06	1.02151e+07	1.12954e+07	1.16755e+07	1.12197e+07	1.11513e+07
2-Methyl-11-oxo-11H-pyrido[2,1-b]quinazoline-6-carboxylic acid	3.74	level1			255.077	215.4	POS	2.18008e+07	2.54726e+07	1.97442e+07	2.51358e+07	2.43454e+07	2.11825e+07	1.6954e+07	2.13207e+07	1.854e+07	1.75693e+07	1.74017e+07	1.47187e+07	1.24535e+07	1.34911e+07	1.42632e+07	1.43023e+07	1.20364e+07	1.34854e+07	1.34679e+07	1.53904e+07	1.3867e+07	1.48681e+07	1.09668e+07	1.53308e+07	1.7442e+07	1.7085e+07	1.76388e+07	1.69997e+07
Phe-Leu	3.74	level1			261.16	151.7	POS	114321	0	0	0	0	110219	534091	0	514704	397333	0	0	9.19893e+06	1.39899e+07	1.05041e+07	9.89068e+06	1.32101e+07	7.16805e+06	0	1.56739e+06	0	166586	4.78425e+06	171912	2.32792e+06	1.73354e+06	2.28848e+06	1.7789e+06
7-methoxy-6-(1,2,3-trihydroxy-3-methyl-butyl)chromen-2-one	3.74	level1			295.119	143.8	POS	3.95457e+06	4.25507e+06	3.0968e+06	3.43588e+06	3.02156e+06	2.9449e+06	1.26363e+06	3.62415e+06	1.47469e+06	4.50523e+06	1.21741e+06	2.32456e+06	4.33081e+07	1.9052e+07	2.706e+07	3.98064e+07	2.8049e+07	3.52824e+07	6.60714e+06	8.6895e+06	4.64559e+06	9.21574e+06	7.58594e+06	4.2587e+06	1.08929e+07	1.16177e+07	1.05256e+07	1.00123e+07
Laurocapram	3.73	level1			282.279	259.9	POS	9.86541e+07	6.28511e+07	6.8872e+07	6.13138e+07	1.15011e+08	5.47157e+07	5.19519e+07	6.51457e+07	5.10645e+07	5.76008e+07	4.71794e+07	9.44655e+07	5.71515e+07	8.80992e+07	5.81709e+07	8.24406e+07	4.98673e+07	5.40072e+07	6.55585e+07	6.61915e+07	6.37486e+07	6.00249e+07	6.66203e+07	6.7463e+07	6.29061e+07	5.49646e+07	5.33962e+07	5.27286e+07
4-[2-[(1R,4aS,5R,8aS)-5-(hydroxymethyl)-5,8a-dimethyl-2-methylene-decalin-1-yl]ethyl]-2H-furan-5-one	3.73	level1			317.212	264.9	NEG	1.8761e+07	1.68613e+07	1.67491e+07	1.61323e+07	2.48293e+07	2.5245e+07	1.59789e+07	2.39014e+07	1.47994e+07	1.72119e+07	1.99698e+07	1.6978e+07	2.18179e+07	1.8102e+07	2.23773e+07	1.99361e+07	2.28449e+07	1.87219e+07	2.30829e+07	2.10563e+07	1.80785e+07	2.11111e+07	2.15936e+07	2.1055e+07	1.99682e+07	1.93716e+07	1.8817e+07	2.06887e+07
(8E)-10-hydroxy-5,9,12,13,16-pentamethyl-4-oxatricyclo[10.3.1.03,5]hexadeca-1(15),8-dien-2-one	3.73	level1			317.212	264.9	NEG	1.8761e+07	1.68613e+07	1.67491e+07	1.61323e+07	2.48293e+07	2.5245e+07	1.59789e+07	2.39014e+07	1.47994e+07	1.72119e+07	1.99698e+07	1.6978e+07	2.18179e+07	1.8102e+07	2.23773e+07	1.99361e+07	2.28449e+07	1.87219e+07	2.30829e+07	2.10563e+07	1.80785e+07	2.11111e+07	2.15936e+07	2.1055e+07	1.99682e+07	1.93716e+07	1.8817e+07	2.06887e+07
(1R,3R,4R,6S,8S,10R,13R,14R)-5,5,14-trimethyl-9-methylene-tetracyclo[11.2.1.01,10.04,8]hexadecane-3,4,6,14-tetrol	3.73	level1			317.212	264.9	NEG	1.8761e+07	1.68613e+07	1.67491e+07	1.61323e+07	2.48293e+07	2.5245e+07	1.59789e+07	2.39014e+07	1.47994e+07	1.72119e+07	1.99698e+07	1.6978e+07	2.18179e+07	1.8102e+07	2.23773e+07	1.99361e+07	2.28449e+07	1.87219e+07	2.30829e+07	2.10563e+07	1.80785e+07	2.11111e+07	2.15936e+07	2.1055e+07	1.99682e+07	1.93716e+07	1.8817e+07	2.06887e+07
2'-Hydroxy-4'-methylacetophenone	3.73	level1			149.061	231.4	NEG	1.51831e+06	1.66933e+06	1.67645e+06	2.0563e+06	1.96416e+06	1.24796e+06	1.20881e+06	1.22395e+06	1.67822e+06	1.87656e+06	1.09903e+06	1.18516e+06	1.56588e+06	1.35981e+06	979132	883999	1.06421e+06	1.06907e+06	956974	1.40754e+06	1.51373e+06	934828	1.42588e+06	1.02739e+06	1.22413e+06	1.01802e+06	1.12953e+06	1.32782e+06
Ethyl 4-hydroxybenzoate	3.73	level1			165.056	167.7	NEG	2.53432e+08	2.54126e+08	2.06923e+08	2.76253e+08	3.05953e+08	2.58627e+08	2.00557e+08	2.36578e+08	2.06666e+08	2.47692e+08	1.66607e+08	2.02671e+08	3.13552e+08	2.78276e+08	2.98522e+08	3.36307e+08	3.0596e+08	3.10298e+08	2.18424e+08	2.56373e+08	2.42259e+08	2.65061e+08	2.06155e+08	2.06872e+08	2.60245e+08	2.57378e+08	2.54174e+08	2.49058e+08
2-Phenyllactic acid	3.73	level1			165.056	167.7	NEG	2.53432e+08	2.54126e+08	2.06923e+08	2.76253e+08	3.05953e+08	2.58627e+08	2.00557e+08	2.36578e+08	2.06666e+08	2.47692e+08	1.66607e+08	2.02671e+08	3.13552e+08	2.78276e+08	2.98522e+08	3.36307e+08	3.0596e+08	3.10298e+08	2.18424e+08	2.56373e+08	2.42259e+08	2.65061e+08	2.06155e+08	2.06872e+08	2.60245e+08	2.57378e+08	2.54174e+08	2.49058e+08
Torachrysone-8-O-b-D-glucoside	3.73	level1			389.124	180.3	NEG	5.42954e+07	5.00422e+07	5.96578e+07	5.52632e+07	5.46175e+07	5.09708e+07	7.304e+07	6.59766e+07	7.59224e+07	5.92115e+07	7.63576e+07	6.46007e+07	3.55918e+07	3.91158e+07	3.99935e+07	3.51812e+07	3.63441e+07	4.07699e+07	3.54289e+07	4.24618e+07	3.6925e+07	3.72076e+07	3.76075e+07	3.61279e+07	4.63864e+07	5.21599e+07	5.06788e+07	5.07995e+07
Homovanillic acid	3.73	level1			181.05	150.3	NEG	6.94634e+06	2.86905e+06	5.87825e+06	3.07674e+06	3.86098e+06	5.17603e+06	6.03704e+06	5.27304e+06	6.2399e+06	5.83731e+06	5.17116e+06	6.92807e+06	4.59338e+06	5.70864e+06	2.0677e+06	3.20527e+06	5.82457e+06	3.08206e+06	2.45087e+06	5.14598e+06	6.50741e+06	4.67128e+06	5.59283e+06	5.00528e+06	6.59229e+06	5.96498e+06	5.12125e+06	3.84724e+06
Methyl isovanillate	3.73	level1			181.05	150.3	NEG	6.94634e+06	2.86905e+06	5.87825e+06	3.07674e+06	3.86098e+06	5.17603e+06	6.03704e+06	5.27304e+06	6.2399e+06	5.83731e+06	5.17116e+06	6.92807e+06	4.59338e+06	5.70864e+06	2.0677e+06	3.20527e+06	5.82457e+06	3.08206e+06	2.45087e+06	5.14598e+06	6.50741e+06	4.67128e+06	5.59283e+06	5.00528e+06	6.59229e+06	5.96498e+06	5.12125e+06	3.84724e+06
Monobutyl phthalate	3.73	level1			205.086	274.4	POS	1.5632e+07	1.36558e+07	1.21794e+07	1.42547e+07	1.36437e+07	1.35442e+07	1.99109e+07	1.63545e+07	1.98012e+07	1.8071e+07	1.74014e+07	1.79312e+07	1.34329e+07	1.56828e+07	1.24797e+07	1.28526e+07	1.88192e+07	1.19463e+07	1.72913e+07	1.0366e+07	1.13508e+07	1.14532e+07	1.21815e+07	1.30056e+07	1.54743e+07	1.48156e+07	1.51054e+07	1.63234e+07
Nevirapine	3.73	level1			265.108	214.1	NEG	1.13116e+07	8.99189e+06	1.18108e+07	1.0382e+07	1.07002e+07	1.02972e+07	1.56519e+07	1.36817e+07	1.26039e+07	1.16703e+07	1.48141e+07	1.23928e+07	1.03042e+07	9.16693e+06	9.04624e+06	9.4621e+06	9.03381e+06	7.53544e+06	8.02517e+06	1.05168e+07	9.98867e+06	9.50494e+06	1.06622e+07	1.14554e+07	1.16773e+07	1.12576e+07	1.16106e+07	1.22973e+07
SKF-82958 (hydrobromide)	3.73	level1			330.124	195	POS	1.75594e+07	1.70693e+07	2.33355e+07	1.76367e+07	1.94727e+07	1.83331e+07	1.73286e+07	3.45347e+07	1.78852e+07	2.83645e+07	2.27128e+07	3.12652e+07	8.40058e+06	9.49902e+06	9.64949e+06	1.10258e+07	8.6686e+06	1.04662e+07	1.60267e+07	1.90214e+07	2.30881e+07	1.86359e+07	1.66103e+07	2.06353e+07	1.77995e+07	1.84211e+07	1.85428e+07	1.79963e+07
3-Succinoylpyridine	3.73	level1			180.065	139.2	POS	1.87754e+08	1.59644e+08	1.19532e+08	1.34308e+08	1.12209e+08	1.54523e+08	1.8516e+08	1.56642e+08	2.04114e+08	2.01793e+08	1.37857e+08	3.48457e+08	6.16243e+08	4.73511e+08	5.7153e+08	5.95382e+08	5.4434e+08	7.65584e+08	1.92691e+08	2.32153e+08	2.13845e+08	2.59782e+08	2.74314e+08	1.6421e+08	3.04402e+08	3.12363e+08	2.95428e+08	2.94235e+08
Harmalol (hydrochloride)	3.73	level1			201.102	94.7	POS	2.52904e+07	4.34644e+07	1.40364e+07	3.47644e+07	2.87628e+07	2.17711e+07	7.0485e+06	1.59912e+07	9.1935e+06	1.97805e+07	930202	5.07507e+06	3.5548e+08	1.73339e+08	1.95909e+08	3.76599e+08	2.40165e+08	2.89568e+08	3.27294e+07	5.8639e+07	3.74881e+07	5.45481e+07	3.92743e+07	3.98037e+07	8.81152e+07	8.30504e+07	8.24656e+07	8.55219e+07
4-[1-hydroxy-2-(methylamino)ethyl]benzene-1,2-diol	3.73	level1			164.071	84.1	NEG	1.53017e+07	2.03661e+07	1.26693e+07	2.27419e+07	2.43505e+07	1.26279e+07	1.84892e+07	1.60618e+07	6.87948e+06	3.52876e+07	2.22894e+07	8.18911e+06	2.31121e+07	1.77187e+07	1.0401e+07	2.64057e+07	1.26449e+07	2.53333e+07	1.28579e+07	1.78722e+07	1.51279e+07	1.63436e+07	7.20829e+06	1.55278e+07	1.68635e+07	1.43756e+07	1.44833e+07	1.42787e+07
4-Hydroxyphenylacetic acid	3.73	level1			151.04	66.1	NEG	1.81299e+08	1.56565e+08	2.49125e+08	1.73435e+08	1.73573e+08	1.72839e+08	1.95676e+08	2.01836e+08	1.68935e+08	2.00038e+08	2.29463e+08	2.54836e+08	1.92275e+08	1.56634e+08	1.43971e+08	1.89778e+08	1.67785e+08	2.04279e+08	1.51479e+08	1.38555e+08	1.37362e+08	1.57938e+08	1.12953e+08	1.39299e+08	1.81161e+08	1.71184e+08	2.19706e+08	1.68174e+08
Mandelic acid	3.73	level1			151.04	66.1	NEG	1.81299e+08	1.56565e+08	2.49125e+08	1.73435e+08	1.73573e+08	1.72839e+08	1.95676e+08	2.01836e+08	1.68935e+08	2.00038e+08	2.29463e+08	2.54836e+08	1.92275e+08	1.56634e+08	1.43971e+08	1.89778e+08	1.67785e+08	2.04279e+08	1.51479e+08	1.38555e+08	1.37362e+08	1.57938e+08	1.12953e+08	1.39299e+08	1.81161e+08	1.71184e+08	2.19706e+08	1.68174e+08
Isonicotinic acid	3.73	level1			124.039	62	POS	1.72589e+07	1.96341e+07	1.73536e+07	2.07982e+07	1.77759e+07	1.86026e+07	1.81705e+07	9.07439e+07	7.19474e+06	7.60788e+06	7.21965e+07	2.05938e+07	2.42844e+07	5.8501e+07	2.36361e+07	2.36026e+07	2.37122e+07	2.39098e+07	1.73834e+07	1.02597e+08	7.8914e+06	2.23862e+07	1.81533e+07	1.67444e+07	1.55443e+07	1.41167e+07	1.56398e+07	6.72064e+06
N-Tigloylglycine	3.73	level1			156.067	56.8	NEG	1.17072e+07	1.27098e+07	1.19973e+07	1.40596e+07	1.00943e+07	1.40334e+07	1.06059e+07	1.51998e+07	1.34107e+07	1.07731e+07	1.11113e+07	1.06348e+07	9.70161e+06	1.08008e+07	1.1311e+07	1.07729e+07	8.74887e+06	1.06118e+07	1.12216e+07	1.44545e+07	1.28099e+07	1.17532e+07	1.11404e+07	1.41565e+07	1.08865e+07	9.70202e+06	1.15301e+07	1.32182e+07
Pantothenic acid	3.73	level1			220.118	52.1	POS	1.40192e+08	6.08816e+07	9.62596e+07	7.53806e+07	1.36611e+08	7.64518e+07	1.09235e+08	1.08986e+08	9.94227e+07	1.01008e+08	1.03198e+08	1.11639e+08	7.16977e+07	6.88092e+07	9.0749e+07	9.87032e+07	6.71912e+07	6.64782e+07	1.54841e+08	8.12022e+07	8.63795e+07	8.85406e+07	7.77328e+07	1.12867e+08	8.62897e+07	7.71362e+07	8.14243e+07	7.78247e+07
N2,N2-Dimethylguanosine	3.73	level1			312.131	50.5	POS	3.5224e+06	4.10059e+06	4.00491e+06	2.81249e+06	2.42611e+06	3.09299e+06	3.48056e+06	4.46607e+06	2.43318e+06	3.37753e+06	3.64947e+06	3.64933e+06	2.32453e+06	3.03098e+06	2.58808e+06	2.21637e+06	1.68207e+06	2.13654e+06	3.03635e+06	3.42031e+06	3.50669e+06	3.9631e+06	3.57338e+06	3.56827e+06	3.13869e+06	3.42747e+06	2.80709e+06	3.05876e+06
Ile-Leu	3.73	level1			245.186	143.1	POS	1.65848e+07	1.78984e+07	1.42252e+07	2.15156e+07	2.66261e+07	1.49394e+07	6.58698e+06	6.92054e+06	7.75807e+06	8.53505e+06	7.71843e+06	5.09449e+06	4.7088e+06	4.15057e+06	4.00992e+06	4.58171e+06	5.52828e+06	4.99072e+06	1.19376e+07	1.25618e+07	8.27951e+06	1.14801e+07	8.41169e+06	1.1603e+07	9.12672e+06	7.24678e+06	9.02152e+06	8.58567e+06
Leu-Ile	3.73	level1			245.186	143.1	POS	1.65848e+07	1.78984e+07	1.42252e+07	2.15156e+07	2.66261e+07	1.49394e+07	6.58698e+06	6.92054e+06	7.75807e+06	8.53505e+06	7.71843e+06	5.09449e+06	4.7088e+06	4.15057e+06	4.00992e+06	4.58171e+06	5.52828e+06	4.99072e+06	1.19376e+07	1.25618e+07	8.27951e+06	1.14801e+07	8.41169e+06	1.1603e+07	9.12672e+06	7.24678e+06	9.02152e+06	8.58567e+06
8a-Hydroxy-4a,8-dimethyl-3,4,5,6,7,8-hexahydronaphthalene-2-carboxylic acid	3.73	level1			223.134	206.9	NEG	1.04891e+08	9.71694e+07	1.01625e+08	9.41615e+07	9.7988e+07	9.11844e+07	1.05211e+08	7.88914e+07	1.09166e+08	8.61659e+07	9.77267e+07	8.32817e+07	9.66538e+07	9.62503e+07	9.79666e+07	8.11089e+07	7.98049e+07	6.90251e+07	7.41927e+07	1.02393e+08	8.6806e+07	7.99504e+07	8.55273e+07	7.43666e+07	9.85048e+07	9.14757e+07	9.93071e+07	8.84559e+07
(2E,6E,10E)-14-[(2S,3R,4S,5S,6R)-4,5-dihydroxy-6-(hydroxymethyl)-3-[(2S,3R,4S,5S,6R)-3,4,5-trihydroxy-6-(hydroxymethyl)tetrahydropyran-2-yl]oxy-tetrahydropyran-2-yl]oxy-4-hydroxy-2,6,10,14-tetramethyl-hexadeca-2,6,10,15-tetraenoic acid	3.73	level1			659.328	203.2	NEG	1.16526e+07	1.22889e+07	1.31132e+07	1.28349e+07	1.11334e+07	8.33435e+06	1.32919e+07	1.61099e+07	1.46939e+07	1.1537e+07	1.23763e+07	1.3265e+07	9.0935e+06	7.2459e+06	9.25015e+06	8.02308e+06	7.00584e+06	8.71849e+06	9.65839e+06	9.62291e+06	1.08233e+07	9.87443e+06	1.02424e+07	1.24945e+07	1.06267e+07	1.02385e+07	1.02584e+07	1.11349e+07
(Z)-3-(4-oxo-5-propan-2-ylidene-2-propylfuran-3-yl)prop-2-enoic acid	3.73	level1			219.102	189.9	POS	2.58175e+07	2.49753e+07	3.07876e+07	2.91822e+07	2.95584e+07	2.40584e+07	3.40516e+07	2.99373e+07	3.61497e+07	2.3264e+07	3.21146e+07	2.35506e+07	1.49009e+07	1.39743e+07	1.72021e+07	1.35066e+07	1.33911e+07	1.33303e+07	1.00699e+07	1.68977e+07	1.12453e+07	1.15938e+07	1.18204e+07	1.10396e+07	2.17341e+07	2.16318e+07	2.10965e+07	2.02436e+07
3-(2,5-Dimethoxyphenyl)propionic acid	3.73	level1			209.082	178.3	NEG	7.24923e+06	7.33864e+06	8.94601e+06	6.44644e+06	6.84698e+06	7.37993e+06	1.25801e+07	1.01001e+07	8.52124e+06	8.5e+06	8.1737e+06	9.76511e+06	7.62733e+06	7.50468e+06	7.96906e+06	8.08025e+06	7.29656e+06	7.11858e+06	8.38026e+06	8.89201e+06	9.98057e+06	8.13912e+06	8.72796e+06	8.65086e+06	9.92051e+06	7.78591e+06	8.42666e+06	7.98922e+06
(2E,5E)-3,5,7-trimethylocta-2,5-dienedioic acid	3.73	level1			211.098	156	NEG	1.53988e+08	1.51875e+08	1.24379e+08	1.62395e+08	1.82267e+08	1.5647e+08	1.25135e+08	1.76518e+08	1.59235e+08	1.74219e+08	1.48513e+08	2.79094e+08	8.07896e+07	1.31895e+08	1.01048e+08	9.98651e+07	7.92889e+07	8.0117e+07	1.44808e+08	2.04039e+08	2.29759e+08	1.99043e+08	1.76754e+08	1.67894e+08	1.64068e+08	1.52658e+08	1.52533e+08	1.50598e+08
Glyceric acid	3.73	level1			105.019	60.6	NEG	6.04833e+07	5.99446e+07	7.10484e+07	6.36659e+07	6.37745e+07	5.79097e+07	8.75694e+07	6.74531e+07	3.9045e+07	5.67597e+07	7.79941e+07	5.21998e+07	5.61993e+07	6.51552e+07	7.24782e+07	6.49045e+07	5.43721e+07	6.32975e+07	6.84002e+07	6.87713e+07	4.95702e+07	7.66816e+07	9.14057e+07	6.72597e+07	6.69869e+07	5.70026e+07	9.85751e+07	4.21609e+07
4-(hydroxymethyl)-2-nitro-phenol	3.73	level1			168.03	198.3	NEG	952840	441252	237559	306334	574176	409213	571249	287943	561784	515614	826930	689326	1.67853e+06	1.67026e+06	2.22519e+06	1.18874e+06	1.45405e+06	2.04838e+06	903973	1.20743e+06	1.56199e+06	1.82744e+06	981589	1.30562e+06	904746	1.50059e+06	1.30915e+06	897724
Ganoderitriol M	3.73	level1			473.364	307.2	NEG	6.15608e+06	2.91686e+06	4.14926e+06	5.32113e+06	6.54445e+06	8.26599e+06	6.21285e+06	5.78364e+06	8.02383e+06	4.02194e+06	3.74775e+06	8.30585e+06	5.59634e+06	4.18483e+06	4.9709e+06	7.05775e+06	4.28746e+06	5.47135e+06	5.26854e+06	7.99175e+06	6.70392e+06	1.32493e+07	4.40024e+06	4.29401e+06	5.639e+06	6.72069e+06	6.66536e+06	6.63847e+06
(E)-4-[2',4-dihydroxy-6-(hydroxymethyl)-1',1',4'a,6'-tetramethyl-spiro[3H-benzofuran-2,5'-decalin]-7-yl]but-3-en-2-one	3.73	level1			427.249	306.5	NEG	9.21134e+06	8.21662e+06	4.3323e+06	6.77104e+06	6.63698e+06	1.51098e+07	9.18869e+06	5.79203e+06	1.36794e+07	5.93747e+06	760406	831579	1.29696e+07	1.34151e+07	1.52853e+07	1.27792e+07	1.41115e+07	1.29893e+07	1.76793e+07	1.90426e+07	2.06715e+07	2.20743e+07	1.49261e+07	1.41289e+07	1.17562e+07	1.15226e+07	1.01695e+07	1.09107e+07
7-hydroxy-3-(hydroxymethyl)-5-methyl-isochromen-1-one	3.73	level1			205.051	244.4	NEG	1.15299e+07	9.4898e+06	9.9746e+06	1.1206e+07	1.03502e+07	1.22461e+07	1.40979e+07	1.31464e+07	1.61188e+07	1.11193e+07	1.24476e+07	9.91436e+06	9.38481e+06	1.12109e+07	1.23383e+07	1.20837e+07	8.95629e+06	1.04113e+07	1.22991e+07	1.27733e+07	1.4253e+07	1.32898e+07	1.32272e+07	1.12035e+07	1.28103e+07	1.26591e+07	1.24814e+07	1.18922e+07
Glycoursodeoxycholic acid	3.72	level1			448.308	287.4	NEG	1.11173e+07	1.24962e+07	1.59417e+07	1.42313e+07	1.49691e+07	1.13645e+07	1.13893e+07	2.14621e+07	1.20965e+07	1.86058e+07	1.7687e+07	1.48346e+07	7.2874e+06	5.94468e+06	6.72857e+06	9.06509e+06	7.19215e+06	8.49435e+06	6.59334e+06	7.97941e+06	6.8271e+06	5.89318e+06	3.32127e+06	7.73524e+06	1.01256e+07	1.03616e+07	1.07304e+07	1.0716e+07
methyl 2-benzamido-3-phenyl-propanoate	3.72	level1			284.128	198.8	POS	2.92593e+06	2.29185e+06	4.43038e+06	1.52452e+06	3.7632e+06	2.71795e+06	7.23481e+06	3.59351e+06	8.58981e+06	9.16481e+06	6.54887e+06	9.29387e+06	1.09602e+07	8.41037e+06	2.41466e+07	1.05929e+07	7.47392e+06	9.59252e+06	2.84081e+06	3.67505e+06	3.00441e+06	3.51158e+06	6.16683e+06	2.41067e+06	4.73431e+06	4.32339e+06	5.70843e+06	4.90921e+06
3,4-Dimethylbenzoic acid	3.72	level1			149.061	231.4	NEG	1.51831e+06	1.66933e+06	1.67645e+06	2.0563e+06	1.96416e+06	1.24796e+06	1.20881e+06	1.22395e+06	1.67822e+06	1.87656e+06	1.09903e+06	1.18516e+06	1.56588e+06	1.35981e+06	979132	883999	1.06421e+06	1.06907e+06	956974	1.40754e+06	1.51373e+06	934828	1.42588e+06	1.02739e+06	1.22413e+06	1.01802e+06	1.12953e+06	1.32782e+06
3-Hydroxyanthranilic acid	3.72	level1			152.035	48.1	NEG	7.91938e+06	8.87601e+06	8.76686e+06	7.47298e+06	8.18004e+06	7.34151e+06	9.27425e+06	9.66008e+06	1.13148e+07	7.66513e+06	3.06869e+06	3.89842e+06	1.04058e+07	1.13249e+07	4.4396e+06	4.14371e+06	3.80614e+06	9.4489e+06	6.75464e+06	1.07609e+07	1.05038e+07	8.79441e+06	8.42255e+06	1.01007e+07	9.46691e+06	3.1439e+06	9.66257e+06	9.19716e+06
(E)-6-hydroxyoctadec-4-enoic acid	3.72	level1			297.244	313.1	NEG	1.79538e+09	1.95582e+09	1.59251e+09	2.11707e+09	1.85714e+09	1.74951e+09	2.07183e+09	2.19698e+09	2.23974e+09	2.42173e+09	1.69001e+09	2.19591e+09	2.72441e+09	2.57559e+09	2.73725e+09	2.42856e+09	2.44085e+09	2.57031e+09	2.11719e+09	2.46661e+09	2.47339e+09	2.34268e+09	2.49657e+09	2.05897e+09	2.15577e+09	2.36076e+09	2.21187e+09	2.34359e+09
2,3-Dimethylphenol	3.72	level1			123.08	197.5	POS	1.26378e+07	2.03115e+07	1.32079e+07	1.90184e+07	2.21069e+07	1.87607e+07	1.49679e+07	2.62773e+07	1.00262e+07	1.29235e+07	1.5454e+07	1.52926e+07	1.17698e+07	9.94465e+06	1.72995e+07	1.2963e+07	9.9098e+06	1.21283e+07	1.18396e+07	1.49015e+07	2.22885e+07	1.4858e+07	1.3273e+07	1.54183e+07	1.57e+07	1.20056e+07	1.42351e+07	1.40241e+07
2,6-Dimethylphenol	3.72	level1			123.08	197.5	POS	1.26378e+07	2.03115e+07	1.32079e+07	1.90184e+07	2.21069e+07	1.87607e+07	1.49679e+07	2.62773e+07	1.00262e+07	1.29235e+07	1.5454e+07	1.52926e+07	1.17698e+07	9.94465e+06	1.72995e+07	1.2963e+07	9.9098e+06	1.21283e+07	1.18396e+07	1.49015e+07	2.22885e+07	1.4858e+07	1.3273e+07	1.54183e+07	1.57e+07	1.20056e+07	1.42351e+07	1.40241e+07
Carvedilol	3.72	level1			387.166	194.3	NEG	2.68082e+07	2.52911e+07	2.04299e+07	2.31154e+07	1.8559e+07	2.68416e+07	3.79318e+07	2.98011e+07	4.13316e+07	3.05505e+07	3.21984e+07	2.06666e+07	3.59044e+07	3.93523e+07	3.82258e+07	6.23131e+07	3.17779e+07	5.97469e+07	3.8239e+07	8.68407e+07	1.07984e+08	4.43745e+07	4.73995e+07	3.60107e+07	3.59749e+07	3.39459e+07	3.451e+07	3.50861e+07
Roxatidine (Acetate Hydrochloride)	3.72	level1			349.213	182.1	POS	1.00585e+07	8.02765e+06	7.9113e+06	8.98682e+06	9.67866e+06	8.71994e+06	1.04245e+07	1.09961e+07	1.11732e+07	9.62028e+06	1.14237e+07	6.93404e+06	1.07741e+07	1.07036e+07	7.53428e+06	1.23126e+07	9.7555e+06	1.13735e+07	1.47809e+07	1.32924e+07	1.56838e+07	1.57237e+07	1.37648e+07	1.54692e+07	1.2081e+07	9.49907e+06	9.70619e+06	1.03589e+07
Hexaethylene glycol	3.72	level1			283.175	142.4	POS	7.63615e+06	9.91927e+06	4.83201e+06	6.22492e+06	4.17552e+06	8.34337e+06	1.55528e+06	1.10713e+06	836838	325427	1.06276e+06	778957	6.76175e+06	7.55211e+06	5.50732e+06	5.12089e+06	6.56782e+06	5.73627e+06	5.38773e+06	6.4338e+06	7.21444e+06	6.02855e+06	8.35427e+06	4.67475e+06	5.82825e+06	5.7341e+06	5.70813e+06	5.16887e+06
3-Hydroxyhippuric acid	3.72	level1			194.046	136.8	NEG	3.6186e+07	2.98201e+07	2.64425e+07	3.08196e+07	3.326e+07	3.59107e+07	4.10351e+07	2.69618e+07	4.23479e+07	2.71057e+07	3.67568e+07	3.05078e+07	3.27796e+07	3.34031e+07	3.33167e+07	3.11e+07	3.20398e+07	3.22296e+07	3.25107e+07	3.71458e+07	3.72212e+07	4.06258e+07	3.67443e+07	3.72343e+07	3.32752e+07	3.57022e+07	3.39945e+07	3.35856e+07
1,3-Dimethyluric acid	3.72	level1			195.051	75.9	NEG	5.93523e+07	4.75766e+07	3.6601e+07	6.80412e+07	5.31681e+07	4.47468e+07	5.11888e+07	1.72297e+07	2.62691e+07	1.71283e+07	4.4432e+07	3.95035e+07	5.15098e+07	6.9029e+07	6.32235e+07	6.0735e+07	9.13579e+07	5.57393e+07	6.37047e+07	2.73847e+07	3.32195e+07	7.00941e+07	6.44063e+07	4.52407e+07	5.36082e+07	5.59197e+07	5.44444e+07	3.33219e+07
4-Aminobenzoic acid	3.72	level1			138.055	61	POS	9.45751e+06	6.86126e+06	6.23843e+06	7.71402e+06	5.76846e+06	6.53951e+06	6.70111e+06	8.85671e+06	6.88385e+06	6.69496e+06	6.49887e+06	7.28022e+06	1.12022e+07	1.15103e+07	1.15501e+07	1.20401e+07	7.97771e+06	1.2906e+07	9.58696e+06	8.88472e+06	9.72406e+06	8.10055e+06	9.51697e+06	8.15457e+06	7.60049e+06	8.6381e+06	7.63187e+06	7.8015e+06
Prolylhydroxyproline	3.72	level1			227.103	43	NEG	1.65999e+07	1.55786e+07	8.28748e+06	9.79073e+06	2.04505e+07	1.44376e+07	5.70449e+06	5.24615e+06	6.5717e+06	1.10762e+07	7.23324e+06	6.82749e+06	1.43323e+07	1.19392e+07	1.22507e+07	9.48203e+06	1.48698e+07	1.48967e+07	1.06413e+07	1.12991e+07	1.03542e+07	1.34354e+07	7.21513e+06	1.29337e+07	1.23675e+07	1.26524e+07	1.28003e+07	1.46501e+07
2-Furoic acid	3.72	level1			113.023	16	POS	7.73176e+06	5.98935e+06	6.193e+06	8.50486e+06	9.79294e+06	7.683e+06	6.23871e+06	1.35176e+07	6.85263e+06	6.48262e+06	1.44613e+07	1.15873e+07	5.19354e+06	5.26068e+06	8.44495e+06	1.30937e+07	1.14251e+07	8.65392e+06	6.98091e+06	6.21303e+06	8.89688e+06	7.75307e+06	9.14164e+06	7.73617e+06	8.71661e+06	7.36653e+06	7.97841e+06	5.44482e+06
[5-hydroxy-6-[2-(4-hydroxy-3-methoxy-phenyl)ethoxy]-2-(hydroxymethyl)-4-(3,4,5-trihydroxy-6-methyl-tetrahydropyran-2-yl)oxy-tetrahydropyran-3-yl] (E)-3-(4-hydroxy-3-methoxy-phenyl)prop-2-enoate	3.72	level1			653.249	202.6	POS	951093	643262	1.16018e+06	631282	1.05733e+06	573183	2.22162e+06	1.53918e+06	5.32529e+06	1.7194e+06	936677	3.05923e+06	155595	182017	248858	263884	55802.1	392235	199822	221804	127734	54835.8	298293	251598	434200	597779	229069	649601
3-benzyl-4-methyl-1,3-dihydro-1,4-benzodiazepine-2,5-dione	3.72	level1			281.129	195.3	POS	3.24409e+07	4.08512e+07	2.3509e+07	3.45187e+07	2.68025e+07	2.95782e+07	2.25509e+07	3.72737e+07	2.3989e+07	3.297e+07	1.82836e+07	2.00923e+07	1.72454e+08	1.0842e+08	1.255e+08	1.88044e+08	1.32399e+08	1.4603e+08	3.26872e+07	3.76396e+07	3.07657e+07	4.54739e+07	3.79106e+07	2.64876e+07	6.35143e+07	6.31029e+07	6.23276e+07	6.15206e+07
2-[[1-[2-[(4-hydroxybenzoyl)amino]-3-methyl-butanoyl]pyrrolidine-2-carbonyl]amino]benzoic acid	3.72	level1			436.187	202.6	POS	1.58056e+06	2.08849e+06	2.04336e+06	2.30185e+06	2.20443e+06	1.33702e+06	625659	1.70739e+06	982038	1.69225e+06	820942	1.07652e+06	1.53204e+06	1.23342e+06	891372	1.73018e+06	1.33933e+06	1.37279e+06	1.1324e+06	1.78077e+06	1.13382e+06	1.25622e+06	0	1.3175e+06	1.4583e+06	1.25959e+06	1.20004e+06	1.18698e+06
3,3-Dimethylcyclohexanone	3.72	level1			109.101	163	POS	1.71988e+07	1.39706e+07	1.62451e+07	1.58071e+07	1.61118e+07	1.61382e+07	1.64847e+07	1.5786e+07	1.60164e+07	1.4823e+07	1.67614e+07	1.53376e+07	1.31691e+07	1.32308e+07	1.47617e+07	1.33328e+07	1.2789e+07	1.48522e+07	1.7764e+07	1.70049e+07	1.75583e+07	1.82315e+07	2.04849e+07	1.73036e+07	1.69015e+07	1.70865e+07	1.52775e+07	1.51638e+07
9-[3,4-dihydroxy-5-(methylsulfanylmethyl)tetrahydrofuran-2-yl]-1H-purin-6-one	3.72	level1			297.061	155.9	NEG	1.02738e+07	1.18438e+07	1.13823e+07	9.28465e+06	7.69606e+06	6.23788e+06	1.06641e+07	1.36642e+07	1.4137e+07	1.09689e+07	1.23966e+07	3.35476e+06	9.45018e+06	1.0328e+07	7.53814e+06	4.86842e+06	7.43384e+06	8.17867e+06	1.44706e+07	1.23722e+07	9.11637e+06	9.78278e+06	1.17188e+07	1.10915e+07	8.47401e+06	1.07988e+07	6.93504e+06	1.0798e+07
Nonaethylene glycol	3.72	level1			415.254	155.7	POS	2.57978e+06	2.85009e+06	2.19871e+06	1.70572e+06	1.30902e+06	2.90912e+06	1.29767e+06	1.55604e+06	1.83443e+06	1.36028e+06	1.33501e+06	1.19114e+06	2.30773e+06	2.6284e+06	1.78555e+06	1.77364e+06	1.97681e+06	1.87789e+06	1.40931e+06	2.44351e+06	2.35219e+06	1.90835e+06	2.28937e+06	1.47806e+06	1.43866e+06	1.69124e+06	1.56537e+06	1.73824e+06
(1R,8S,16S,17S)-12-methoxy-5-oxido-15-aza-5-azoniahexacyclo[13.4.2.01,16.05,16.08,17.09,14]henicosa-2,9(14),10,12-tetraen-21-one	3.72	level1			321.159	221	POS	2.58058e+07	2.38834e+07	1.93158e+07	2.51977e+07	2.5321e+07	2.58597e+07	2.64674e+07	2.57866e+07	2.39834e+07	2.56373e+07	2.96484e+07	2.48213e+07	4.64252e+07	2.33663e+07	2.73243e+07	6.24627e+07	2.28337e+07	2.88459e+07	2.63168e+07	2.78857e+07	2.7104e+07	2.93817e+07	2.71807e+07	2.85966e+07	2.62625e+07	2.82587e+07	2.76381e+07	2.54057e+07
Glycohyodeoxycholic acid	3.71	level1			448.308	287.4	NEG	1.11173e+07	1.24962e+07	1.59417e+07	1.42313e+07	1.49691e+07	1.13645e+07	1.13893e+07	2.14621e+07	1.20965e+07	1.86058e+07	1.7687e+07	1.48346e+07	7.2874e+06	5.94468e+06	6.72857e+06	9.06509e+06	7.19215e+06	8.49435e+06	6.59334e+06	7.97941e+06	6.8271e+06	5.89318e+06	3.32127e+06	7.73524e+06	1.01256e+07	1.03616e+07	1.07304e+07	1.0716e+07
2-[(2S,4aR,8aS)-2-hydroxy-4a-methyl-8-methylene-decalin-2-yl]prop-2-enoic acid	3.71	level1			249.149	224	NEG	1.49169e+07	1.49244e+07	1.42694e+07	1.62324e+07	1.44575e+07	2.20646e+07	1.91801e+07	1.89273e+07	1.66142e+07	1.75091e+07	1.72559e+07	1.9749e+07	1.89482e+07	1.79848e+07	1.89224e+07	1.90295e+07	1.96192e+07	1.77984e+07	2.17219e+07	2.2474e+07	2.32705e+07	2.23972e+07	2.19464e+07	2.28091e+07	1.79148e+07	1.90295e+07	1.83909e+07	1.94341e+07
Caffeic acid	3.71	level1			179.035	164.4	NEG	1.39483e+08	6.51778e+07	8.27943e+07	5.89387e+07	8.2304e+07	6.79671e+07	9.90291e+07	7.75985e+07	1.12281e+08	7.44561e+07	7.77878e+07	7.42271e+07	7.76653e+07	6.50573e+07	1.11202e+08	5.02371e+07	4.93172e+07	4.56879e+07	8.47233e+07	9.61403e+07	8.28841e+07	7.44801e+07	7.6788e+07	7.41437e+07	7.36602e+07	7.34021e+07	1.04843e+08	7.28203e+07
3a,8-dihydroxy-3,5a,9-trimethyl-4,5,6,7,8,9b-hexahydro-3H-benzo[g]benzofuran-2-one	3.71	level1			265.144	243.1	NEG	3.40854e+07	3.84345e+07	2.48811e+07	3.75045e+07	2.88824e+07	3.12466e+07	3.24047e+07	3.01529e+07	3.90962e+07	2.74867e+07	2.48171e+07	2.85615e+07	1.354e+07	2.24578e+07	1.31524e+07	1.19528e+07	1.1367e+07	1.21167e+07	1.95092e+07	1.87235e+07	2.59525e+07	2.35075e+07	2.71174e+07	2.45783e+07	2.4889e+07	2.47373e+07	2.4473e+07	2.33069e+07
(3aR,5S,7S,8R,8aS,9aR)-7,8-dihydroxy-5,8a-dimethyl-1-methylene-4,5,5a,6,7,8,9,9a-octahydro-3aH-azuleno[6,5-b]furan-2-one	3.71	level1			265.144	243.1	NEG	3.40854e+07	3.84345e+07	2.48811e+07	3.75045e+07	2.88824e+07	3.12466e+07	3.24047e+07	3.01529e+07	3.90962e+07	2.74867e+07	2.48171e+07	2.85615e+07	1.354e+07	2.24578e+07	1.31524e+07	1.19528e+07	1.1367e+07	1.21167e+07	1.95092e+07	1.87235e+07	2.59525e+07	2.35075e+07	2.71174e+07	2.45783e+07	2.4889e+07	2.47373e+07	2.4473e+07	2.33069e+07
3-Ethylphenol	3.71	level1			123.08	197.5	POS	1.26378e+07	2.03115e+07	1.32079e+07	1.90184e+07	2.21069e+07	1.87607e+07	1.49679e+07	2.62773e+07	1.00262e+07	1.29235e+07	1.5454e+07	1.52926e+07	1.17698e+07	9.94465e+06	1.72995e+07	1.2963e+07	9.9098e+06	1.21283e+07	1.18396e+07	1.49015e+07	2.22885e+07	1.4858e+07	1.3273e+07	1.54183e+07	1.57e+07	1.20056e+07	1.42351e+07	1.40241e+07
2,5-Dimethylphenol	3.71	level1			123.08	197.5	POS	1.26378e+07	2.03115e+07	1.32079e+07	1.90184e+07	2.21069e+07	1.87607e+07	1.49679e+07	2.62773e+07	1.00262e+07	1.29235e+07	1.5454e+07	1.52926e+07	1.17698e+07	9.94465e+06	1.72995e+07	1.2963e+07	9.9098e+06	1.21283e+07	1.18396e+07	1.49015e+07	2.22885e+07	1.4858e+07	1.3273e+07	1.54183e+07	1.57e+07	1.20056e+07	1.42351e+07	1.40241e+07
Cholesteryl sulfate	3.71	level1			465.298	319.8	NEG	8.76201e+06	2.25883e+07	1.77957e+07	1.32065e+07	1.49479e+07	1.54218e+07	8.94078e+06	7.38668e+06	1.36254e+07	1.08572e+07	9.13337e+06	5.99722e+06	1.34725e+07	1.42421e+07	1.88936e+07	1.41368e+07	1.93513e+07	8.3487e+06	9.01074e+06	7.61349e+06	1.42473e+07	1.37311e+07	7.41821e+06	1.15944e+07	6.19116e+06	8.17615e+06	1.20156e+07	1.25118e+07
21-Hydroxypregnenolone	3.71	level1			331.229	298.6	NEG	2.13048e+06	2.11309e+06	2.51786e+06	2.33069e+06	1.9369e+06	3.49094e+06	3.25111e+06	2.75726e+06	2.7385e+06	2.41026e+06	3.4542e+06	3.71597e+06	2.46495e+06	3.26594e+06	2.05913e+06	2.32502e+06	2.54728e+06	2.17194e+06	2.48252e+06	2.32166e+06	2.41079e+06	2.18709e+06	2.86432e+06	2.45555e+06	2.31193e+06	2.71625e+06	2.72059e+06	2.68599e+06
Naratriptan (hydrochloride)	3.71	level1			336.174	208.4	POS	1.81443e+06	3.85381e+06	2.08634e+06	1.84124e+06	1.22307e+06	1.75171e+06	0	1.41954e+06	227342	1.313e+06	276636	0	7.42453e+06	7.40516e+06	5.51031e+06	1.87283e+07	1.10839e+07	8.85156e+06	1.49356e+06	1.93629e+06	1.13649e+06	1.49465e+06	819700	1.66239e+06	3.15643e+06	3.16777e+06	3.61505e+06	3.31806e+06
N-Acetylgalactosamine	3.71	level1			202.072	65.5	NEG	1.64568e+07	1.53649e+07	3.81425e+06	1.02727e+07	4.11067e+06	1.64461e+07	5.96973e+06	1.6917e+07	7.57173e+06	5.24742e+06	4.6202e+06	4.22599e+06	1.06599e+07	4.85219e+06	1.17542e+07	3.93513e+06	5.2079e+06	3.39382e+06	6.79712e+06	1.6797e+07	1.40443e+07	1.85034e+07	6.59611e+06	6.74792e+06	5.78637e+06	5.23812e+06	1.54406e+07	1.50452e+07
gamma-Glutamylmethionine	3.71	level1			277.083	29.2	NEG	1.64398e+08	1.91353e+08	1.9185e+08	1.88784e+08	1.66906e+08	1.50792e+08	1.29093e+08	1.85731e+08	1.33384e+08	1.63172e+08	1.46919e+08	1.3818e+08	2.27734e+08	1.93302e+08	2.46461e+08	2.08711e+08	1.59909e+08	2.02276e+08	2.15445e+08	2.10337e+08	2.14468e+08	2.48954e+08	2.11912e+08	1.88894e+08	1.9624e+08	1.91905e+08	1.91799e+08	1.86648e+08
(2S,3R,5S,9R)-2,3-dihydroxy-14-(hydroxymethyl)-5,9-dimethyl-14-[(2S,3R,4S,5S,6R)-3,4,5-trihydroxy-6-(hydroxymethyl)tetrahydropyran-2-yl]oxy-tetracyclo[11.2.1.01,10.04,9]hexadecane-5-carboxylic acid	3.71	level1			531.28	230.3	POS	4.56685e+06	6.46377e+06	3.67316e+06	5.06773e+06	4.90968e+06	3.20515e+06	3.6391e+06	4.17194e+06	5.50571e+06	3.96798e+06	3.48727e+06	3.79998e+06	2.37488e+06	1.67803e+06	2.05677e+06	1.58784e+06	1.34806e+06	862047	1.80986e+06	1.95472e+06	1.46157e+06	1.74446e+06	1.53524e+06	1.95302e+06	3.09473e+06	3.18121e+06	3.30119e+06	2.50214e+06
(3aS,5R,7S,7aR)-2,7-diacetyloxy-3-formyl-3a-hydroxy-1,1,3,5-tetramethyl-2,4,5,6,7,7a-hexahydroindene-4-carboxylic acid	3.71	level1			383.17	191.1	NEG	9.42794e+07	6.74851e+07	9.2823e+07	5.85999e+07	6.21563e+07	8.81649e+07	1.35295e+08	9.57713e+07	1.41639e+08	1.02085e+08	1.0822e+08	1.45284e+08	7.58283e+07	8.13552e+07	9.35177e+07	5.68414e+07	7.3806e+07	5.4973e+07	9.72476e+07	1.06134e+08	1.22034e+08	9.31382e+07	9.8321e+07	1.08476e+08	1.1518e+08	9.32989e+07	1.24867e+08	9.46612e+07
5,5-dimethyl-4-[(E)-3-methyl-7-[(2R,3R,4S,5S,6R)-3,4,5-trihydroxy-6-(hydroxymethyl)oxan-2-yl]oxyoct-3-enyl]oxolan-2-one	3.71	level1			415.234	245.1	NEG	1.03673e+07	8.32829e+06	6.28067e+06	7.1986e+06	9.55292e+06	9.95132e+06	8.76907e+06	8.33526e+06	8.01285e+06	7.11158e+06	1.02564e+07	4.88819e+06	5.25315e+06	4.11651e+06	1.8112e+07	7.35157e+06	3.64469e+06	6.43134e+06	2.37608e+07	3.20812e+07	2.64605e+07	1.30408e+07	1.18291e+07	2.82009e+07	9.96773e+06	9.57514e+06	9.95559e+06	9.47178e+06
(10Z,13Z)-15,16-dihydroxyoctadeca-10,13-dienoic acid	3.71	level1			295.227	232.9	POS	1.92007e+07	2.49009e+07	2.51696e+07	1.33461e+07	2.24607e+07	3.55988e+07	3.4448e+07	3.75392e+07	3.48201e+07	3.09574e+07	3.52757e+07	3.73074e+07	2.35456e+07	2.1569e+07	2.54794e+07	2.52646e+07	2.31737e+07	2.32582e+07	2.75081e+07	2.88283e+07	3.12429e+07	2.70528e+07	2.99171e+07	2.78825e+07	1.85908e+07	2.93469e+07	2.94496e+07	2.84628e+07
2,3,4,9-tetrahydropyrido[3,4-b]indol-1-one	3.71	level1			187.087	166.3	POS	4.50011e+07	3.89165e+07	4.12844e+07	4.75411e+07	4.1357e+07	4.75229e+07	5.86671e+07	5.23952e+07	5.83661e+07	5.20933e+07	4.9541e+07	5.44269e+07	4.12959e+07	3.91128e+07	4.23509e+07	7.10517e+07	7.40837e+07	4.52855e+07	5.02968e+07	7.11935e+07	5.54373e+07	5.70056e+07	5.17591e+07	5.50314e+07	4.75063e+07	4.75762e+07	4.82006e+07	4.7333e+07
Oleuropein	3.71	level1			523.182	149.8	POS	450175	527152	153636	608633	136513	389937	81967.5	470307	55499.1	519487	327141	165764	3.22239e+06	2.17445e+06	2.57372e+06	3.4795e+06	2.79049e+06	2.71508e+06	665232	915340	613956	1.10938e+06	863149	604220	1.19719e+06	1.31449e+06	1.2789e+06	1.37946e+06
(E)-5-[(1R,3S,4aS,5S,8aS)-3-hydroxy-1,4a,5-trimethyl-2-methylidene-4,5,6,7,8,8a-hexahydro-3H-naphthalen-1-yl]-3-methylpent-2-enoic acid	3.71	level1			319.228	294	NEG	9.13516e+06	8.24068e+06	9.6174e+06	9.69088e+06	1.06375e+07	9.76525e+06	1.48647e+07	1.39093e+07	1.19186e+07	1.37285e+07	1.48996e+07	1.34416e+07	8.9329e+06	7.84253e+06	1.52748e+07	1.09947e+07	9.21837e+06	8.74922e+06	7.60947e+06	1.05706e+07	1.01631e+07	9.72113e+06	9.49209e+06	9.38961e+06	9.65158e+06	1.01833e+07	1.2617e+07	1.05445e+07
(2Z)-2-[(4S,5S,6S,8S,9S,10R,13R,14S,16S)-6,16-diacetoxy-4,8,10,14-tetramethyl-3,7-dioxo-5,6,9,11,12,13,15,16-octahydro-4H-cyclopenta[a]phenanthren-17-ylidene]-6-methyl-hept-5-enoic acid	3.71	level1			549.291	252.4	NEG	1.16196e+07	1.11146e+07	1.1068e+07	1.21316e+07	1.0285e+07	1.21813e+07	1.57731e+07	2.57558e+06	1.34562e+07	1.05491e+07	1.255e+07	1.01118e+07	9.18633e+06	9.94876e+06	1.18264e+07	9.85346e+06	8.77916e+06	9.85204e+06	1.11183e+07	1.26951e+07	1.31001e+07	1.35714e+07	1.28861e+07	1.54096e+07	1.26163e+07	1.20754e+07	1.23285e+07	1.07945e+07
Methyl 5-hydroxypyridine-2-carboxylate	3.71	level1			152.035	215.4	NEG	4.35578e+06	4.77628e+06	4.52978e+06	4.53805e+06	4.51515e+06	9.0342e+06	4.34861e+06	4.12412e+06	6.71737e+06	6.7653e+06	4.11746e+06	8.21655e+06	5.10294e+06	4.5929e+06	9.69306e+06	8.43343e+06	5.38643e+06	4.69287e+06	6.85667e+06	6.54236e+06	5.65076e+06	6.57171e+06	6.5947e+06	6.60817e+06	5.18825e+06	4.99819e+06	4.94249e+06	5.48618e+06
Oleamide	3.7	level1			282.279	259.9	POS	9.86541e+07	6.28511e+07	6.8872e+07	6.13138e+07	1.15011e+08	5.47157e+07	5.19519e+07	6.51457e+07	5.10645e+07	5.76008e+07	4.71794e+07	9.44655e+07	5.71515e+07	8.80992e+07	5.81709e+07	8.24406e+07	4.98673e+07	5.40072e+07	6.55585e+07	6.61915e+07	6.37486e+07	6.00249e+07	6.66203e+07	6.7463e+07	6.29061e+07	5.49646e+07	5.33962e+07	5.27286e+07
all-trans-5,6-Epoxyretinoic acid	3.7	level1			315.197	254.3	NEG	7.87444e+06	8.0698e+06	8.24831e+06	9.07709e+06	8.77144e+06	8.73127e+06	7.5419e+06	1.16197e+07	8.4758e+06	9.20655e+06	7.22993e+06	7.47274e+06	1.25901e+07	1.43607e+07	1.74559e+07	1.22529e+07	1.27776e+07	1.56019e+07	1.36593e+07	1.49395e+07	1.53001e+07	1.40834e+07	1.61797e+07	1.38198e+07	1.127e+07	1.1747e+07	1.08699e+07	1.09534e+07
Vanillic acid	3.7	level1			167.035	159.7	NEG	7.05286e+07	7.1293e+07	5.34807e+07	7.58542e+07	8.23986e+07	7.46063e+07	8.06457e+07	7.42794e+07	9.38059e+07	8.20836e+07	6.40273e+07	4.4437e+07	7.02501e+07	7.08972e+07	7.43291e+07	8.26534e+07	7.82913e+07	7.28654e+07	6.17453e+07	7.20808e+07	6.70868e+07	6.41702e+07	7.19111e+07	6.56835e+07	7.17493e+07	7.18011e+07	7.29706e+07	7.3913e+07
5-Methoxysalicylic acid	3.7	level1			167.035	159.7	NEG	7.05286e+07	7.1293e+07	5.34807e+07	7.58542e+07	8.23986e+07	7.46063e+07	8.06457e+07	7.42794e+07	9.38059e+07	8.20836e+07	6.40273e+07	4.4437e+07	7.02501e+07	7.08972e+07	7.43291e+07	8.26534e+07	7.82913e+07	7.28654e+07	6.17453e+07	7.20808e+07	6.70868e+07	6.41702e+07	7.19111e+07	6.56835e+07	7.17493e+07	7.18011e+07	7.29706e+07	7.3913e+07
3-Amino-4-methylpentanoic acid	3.7	level1			130.087	61	NEG	1.58959e+07	1.5448e+07	1.35461e+07	4.34489e+07	2.21529e+07	2.23761e+07	1.28135e+07	3.65743e+07	2.15842e+07	1.34513e+07	1.2752e+07	7.90372e+06	1.72838e+07	1.34699e+07	1.43436e+07	1.53777e+06	8.07938e+06	1.17049e+07	1.96155e+07	2.32031e+07	4.1269e+07	3.84514e+07	1.85025e+07	1.59153e+07	1.9416e+07	1.57834e+07	1.43612e+07	1.79368e+07
Neantine	3.7	level1			205.086	274.4	POS	1.5632e+07	1.36558e+07	1.21794e+07	1.42547e+07	1.36437e+07	1.35442e+07	1.99109e+07	1.63545e+07	1.98012e+07	1.8071e+07	1.74014e+07	1.79312e+07	1.34329e+07	1.56828e+07	1.24797e+07	1.28526e+07	1.88192e+07	1.19463e+07	1.72913e+07	1.0366e+07	1.13508e+07	1.14532e+07	1.21815e+07	1.30056e+07	1.54743e+07	1.48156e+07	1.51054e+07	1.63234e+07
Pactimibe	3.7	level1			399.301	229.6	POS	8.51967e+06	8.3303e+06	2.47e+06	5.02207e+06	2.87812e+06	9.68914e+06	9.10438e+06	9.04291e+06	7.07345e+06	1.1958e+07	6.93198e+06	8.0499e+06	2.8962e+07	2.75824e+07	3.82836e+07	3.00515e+07	3.00393e+07	2.83354e+07	2.0835e+07	3.2675e+07	2.20099e+07	2.08438e+07	3.11304e+07	1.43776e+07	1.73594e+07	1.95004e+07	1.65705e+07	1.79083e+07
2-Methylbutyrylglycine	3.7	level1			158.082	152.5	NEG	1.16973e+07	9.25599e+06	7.62095e+06	1.28909e+07	1.43191e+07	2.03091e+07	1.37087e+07	1.49568e+07	1.08083e+07	1.06935e+07	1.16232e+07	1.63302e+07	9.02034e+06	1.66846e+07	9.02574e+06	1.12852e+07	7.33963e+06	1.11006e+07	9.71235e+06	1.17711e+07	2.12431e+07	1.0716e+07	2.10398e+07	2.23084e+07	1.15334e+07	1.29324e+07	9.68539e+06	1.89507e+07
N-Acetylvaline	3.7	level1			158.082	48.1	NEG	3.12294e+07	3.49089e+07	4.4473e+07	6.63275e+07	6.07566e+07	5.23658e+07	6.96639e+07	4.66165e+07	5.88438e+07	8.56745e+07	9.53991e+07	4.44667e+07	3.39042e+07	3.30196e+07	2.2703e+07	3.84592e+07	3.53108e+07	5.48183e+07	5.98449e+07	5.46014e+07	2.43599e+07	5.35276e+07	5.8868e+07	2.63698e+07	3.30832e+07	7.02049e+07	3.0819e+07	5.34612e+07
Lauramine oxide	3.7	level1			230.247	234.9	POS	6.85801e+08	6.14923e+08	7.91919e+08	6.84879e+08	6.97156e+08	7.97971e+08	6.39256e+08	5.53036e+08	6.62379e+08	5.76195e+08	7.2882e+08	7.01835e+08	8.55893e+08	6.09091e+08	7.44851e+08	6.57134e+08	5.62697e+08	8.1876e+08	5.81992e+08	8.17786e+08	6.83352e+08	6.87649e+08	6.79564e+08	6.61492e+08	6.77773e+08	7.07965e+08	7.11037e+08	7.00137e+08
[(6R,7R)-7-hydroxy-7-methyl-8-oxo-3-[(E)-prop-1-enyl]-5,6-dihydro-1H-isochromen-6-yl] 3,6-dihydroxy-4-methoxy-2-methyl-benzoate	3.7	level1			417.155	196	POS	1.23288e+07	1.1606e+07	4.04488e+07	1.44619e+07	1.31156e+07	1.2672e+07	1.58921e+07	4.50036e+07	1.55224e+07	3.97812e+07	5.28889e+07	1.50667e+07	2.35506e+07	2.24894e+07	1.24649e+07	2.48809e+07	9.98029e+06	2.15304e+07	1.10067e+07	1.39427e+07	1.05676e+07	9.67793e+06	9.77786e+06	9.83924e+06	1.19915e+07	1.21903e+07	1.26588e+07	1.17707e+07
14-Deoxyandrographolide	3.69	level1			333.207	275.5	NEG	7.03912e+06	6.12847e+06	4.91848e+06	4.67488e+06	5.48102e+06	5.8471e+06	1.00723e+07	7.3085e+06	5.94002e+06	2.03692e+07	7.27314e+06	6.32194e+06	5.70702e+06	6.52387e+06	7.74611e+06	7.09525e+06	5.66384e+06	7.6853e+06	1.91106e+07	6.71957e+06	6.46012e+06	7.17354e+06	6.60919e+06	5.33371e+06	7.4084e+06	5.97214e+06	7.06166e+06	6.81557e+06
gamma-CEHC (gamma-Carboxyethyl hydrochroman)	3.69	level1			263.129	201.9	NEG	6.07029e+07	6.50418e+07	3.67396e+07	5.28293e+07	2.85467e+07	5.46231e+07	3.46265e+07	4.00599e+07	3.20331e+07	3.87085e+07	3.9595e+07	3.6875e+07	1.91734e+07	1.913e+07	2.21312e+07	3.40826e+07	1.65719e+07	1.66284e+07	2.77266e+07	4.37078e+07	2.83201e+07	5.44538e+07	2.90681e+07	3.04607e+07	2.84336e+07	5.95772e+07	2.78371e+07	6.06131e+07
Diabeton	3.69	level1			152.035	48.1	NEG	7.91938e+06	8.87601e+06	8.76686e+06	7.47298e+06	8.18004e+06	7.34151e+06	9.27425e+06	9.66008e+06	1.13148e+07	7.66513e+06	3.06869e+06	3.89842e+06	1.04058e+07	1.13249e+07	4.4396e+06	4.14371e+06	3.80614e+06	9.4489e+06	6.75464e+06	1.07609e+07	1.05038e+07	8.79441e+06	8.42255e+06	1.01007e+07	9.46691e+06	3.1439e+06	9.66257e+06	9.19716e+06
N-Acetylglucosamine	3.69	level1			202.072	65.5	NEG	1.64568e+07	1.53649e+07	3.81425e+06	1.02727e+07	4.11067e+06	1.64461e+07	5.96973e+06	1.6917e+07	7.57173e+06	5.24742e+06	4.6202e+06	4.22599e+06	1.06599e+07	4.85219e+06	1.17542e+07	3.93513e+06	5.2079e+06	3.39382e+06	6.79712e+06	1.6797e+07	1.40443e+07	1.85034e+07	6.59611e+06	6.74792e+06	5.78637e+06	5.23812e+06	1.54406e+07	1.50452e+07
Bullatine B	3.69	level1			420.275	198.6	POS	4.83034e+06	6.29356e+06	8.40765e+06	4.84417e+06	7.41464e+06	8.09953e+06	9.35605e+06	1.04465e+07	5.21671e+06	6.45888e+06	1.04058e+07	1.02185e+07	3.33585e+06	2.60278e+06	2.05236e+06	2.87896e+06	2.04762e+06	2.47488e+06	4.19945e+06	6.02242e+06	5.91224e+06	4.19681e+06	3.04726e+06	4.5544e+06	3.88345e+06	6.86547e+06	4.91079e+06	6.61403e+06
3-Methyloxindole	3.69	level1			130.065	173.5	POS	1.29671e+08	2.29186e+08	1.30953e+08	1.22662e+08	3.88008e+08	1.23869e+08	8.92836e+07	9.69511e+07	9.22389e+07	9.78324e+07	9.80729e+07	9.57664e+07	2.24448e+08	2.26077e+08	2.30876e+08	2.35829e+08	2.25724e+08	2.29139e+08	2.24474e+08	1.31088e+08	1.07964e+08	1.14916e+08	1.26946e+08	9.87293e+07	2.38635e+08	2.26412e+08	2.20934e+08	2.26838e+08
Blinin	3.69	level1			391.208	231.3	NEG	3.1295e+07	2.70244e+07	3.41815e+07	2.30398e+07	2.8367e+07	3.69759e+07	4.35705e+07	4.38169e+07	3.2405e+07	4.15833e+07	4.41234e+07	4.67247e+07	2.29874e+07	1.9091e+07	2.12895e+07	2.02262e+07	1.79557e+07	1.93372e+07	1.77917e+07	2.46056e+07	2.37013e+07	2.19818e+07	2.81568e+07	2.61946e+07	2.76396e+07	2.89519e+07	3.14488e+07	2.93164e+07
4-benzyl-4-hydroxy-7-isopropyl-15-oxa-2,5,8-triazatricyclo[8.5.0.03,8]pentadeca-1(10),2,11,13-tetraene-6,9-dione	3.69	level1			362.151	198.5	POS	1.31603e+07	1.21677e+07	1.31604e+07	1.12874e+07	1.38757e+07	1.21246e+07	9.40579e+06	1.28684e+07	1.26553e+07	1.3373e+07	1.00525e+07	1.54099e+07	1.15251e+07	1.24959e+07	1.25183e+07	1.32217e+07	1.04628e+07	1.25333e+07	1.12698e+07	1.64347e+07	1.50237e+07	1.20069e+07	9.00611e+06	1.47391e+07	1.2313e+07	1.24625e+07	1.22796e+07	1.28945e+07
2-(1,5,8-trihydroxy-4a,8-dimethyl-1,2,3,4,5,6,7,8a-octahydronaphthalen-2-yl)prop-2-enoic acid	3.69	level1			283.155	229.2	NEG	1.86947e+07	1.65158e+07	1.18817e+07	1.45988e+07	1.66058e+07	2.04681e+07	1.07617e+07	1.67551e+07	1.21981e+07	1.61341e+07	1.52395e+07	1.18308e+07	1.72683e+07	1.6095e+07	1.77023e+07	1.48891e+07	1.63224e+07	1.44019e+07	1.42912e+07	1.71043e+07	1.8051e+07	1.96676e+07	1.92063e+07	1.29973e+07	1.84279e+07	1.743e+07	1.72354e+07	1.68034e+07
N-methyl-1H-indole-2-carboxamide	3.69	level1			175.087	143.2	POS	1.56692e+07	1.63253e+07	1.39746e+07	9.94821e+06	9.43546e+06	1.46019e+07	1.06333e+07	1.48604e+07	1.57115e+07	1.71742e+07	7.78565e+06	1.39887e+07	5.59053e+07	4.09654e+07	4.33539e+07	8.71441e+07	4.78626e+07	5.99588e+07	1.98433e+07	3.35799e+07	2.00587e+07	2.84138e+07	1.86662e+07	1.63563e+07	2.23349e+07	4.00349e+07	4.08496e+07	2.4442e+07
Levonordefrin	3.68	level1			164.071	84.1	NEG	1.53017e+07	2.03661e+07	1.26693e+07	2.27419e+07	2.43505e+07	1.26279e+07	1.84892e+07	1.60618e+07	6.87948e+06	3.52876e+07	2.22894e+07	8.18911e+06	2.31121e+07	1.77187e+07	1.0401e+07	2.64057e+07	1.26449e+07	2.53333e+07	1.28579e+07	1.78722e+07	1.51279e+07	1.63436e+07	7.20829e+06	1.55278e+07	1.68635e+07	1.43756e+07	1.44833e+07	1.42787e+07
3,4-Dihydroxyphenylglycol	3.68	level1			151.04	66.1	NEG	1.81299e+08	1.56565e+08	2.49125e+08	1.73435e+08	1.73573e+08	1.72839e+08	1.95676e+08	2.01836e+08	1.68935e+08	2.00038e+08	2.29463e+08	2.54836e+08	1.92275e+08	1.56634e+08	1.43971e+08	1.89778e+08	1.67785e+08	2.04279e+08	1.51479e+08	1.38555e+08	1.37362e+08	1.57938e+08	1.12953e+08	1.39299e+08	1.81161e+08	1.71184e+08	2.19706e+08	1.68174e+08
12-Hydroxystearic acid	3.68	level1			281.248	325	NEG	4.39941e+08	4.82973e+08	4.92754e+08	4.8567e+08	5.06082e+08	4.79855e+08	4.75623e+08	5.67281e+08	5.04253e+08	5.35704e+08	5.1313e+08	4.91992e+08	5.74011e+08	5.05971e+08	5.31707e+08	4.58418e+08	4.06637e+08	4.44973e+08	4.34692e+08	4.99498e+08	4.27658e+08	4.62329e+08	4.75029e+08	4.25223e+08	4.72814e+08	5.25969e+08	4.75967e+08	5.1613e+08
Dodecanedioic acid	3.68	level1			229.144	202.7	NEG	1.36937e+07	1.14198e+07	1.65782e+07	1.50476e+07	1.64541e+07	1.80485e+07	1.53026e+07	1.48171e+07	1.85379e+07	1.38093e+07	1.48075e+07	1.60245e+07	1.35559e+07	1.72085e+07	1.49554e+07	1.50046e+07	1.29147e+07	1.22676e+07	1.71988e+07	1.30312e+07	1.69955e+07	1.43011e+07	1.48404e+07	1.95551e+07	1.3493e+07	1.76465e+07	1.37188e+07	1.38662e+07
2-Hydroxyglutaric acid	3.68	level1			147.03	75	NEG	3.77802e+07	1.70613e+07	1.80709e+07	1.60525e+07	2.17773e+07	1.97677e+07	1.91428e+07	2.37911e+07	2.54727e+07	1.73088e+07	1.76293e+07	1.5082e+07	2.17478e+07	2.17776e+07	2.36789e+07	2.07443e+07	1.63029e+07	1.60121e+07	2.24485e+07	2.6268e+07	2.72126e+07	2.77055e+07	2.32463e+07	2.5032e+07	2.42788e+07	2.17123e+07	1.95491e+07	3.01718e+07
1,7-diazatricyclo[7.3.0.03,7]dodecane-2,8-dione	3.68	level1			195.113	41.7	POS	1.47772e+07	1.11348e+07	1.75744e+07	1.78592e+07	1.16052e+07	1.6353e+07	1.52561e+07	1.73795e+07	1.5985e+07	1.48195e+07	1.23682e+07	1.64384e+07	1.65549e+07	8.56443e+06	2.46005e+07	1.94669e+07	9.55249e+06	8.40094e+06	1.5785e+07	1.34003e+07	1.46856e+07	3.39136e+07	1.52494e+07	1.78696e+07	3.04605e+07	1.43544e+07	1.46123e+07	2.86338e+07
Citramalic acid	3.67	level1			147.03	75	NEG	3.77802e+07	1.70613e+07	1.80709e+07	1.60525e+07	2.17773e+07	1.97677e+07	1.91428e+07	2.37911e+07	2.54727e+07	1.73088e+07	1.76293e+07	1.5082e+07	2.17478e+07	2.17776e+07	2.36789e+07	2.07443e+07	1.63029e+07	1.60121e+07	2.24485e+07	2.6268e+07	2.72126e+07	2.77055e+07	2.32463e+07	2.5032e+07	2.42788e+07	2.17123e+07	1.95491e+07	3.01718e+07
NAE(18:0)	3.67	level1			328.32	321.7	POS	1.15362e+06	1.96304e+06	1.58536e+06	1.46172e+06	1.77314e+06	1.31643e+06	1.51263e+06	1.65636e+06	1.93735e+06	1.79798e+06	2.03155e+06	1.57386e+06	1.33222e+06	712076	1.20107e+06	808645	805705	803896	1.09398e+06	1.56619e+06	1.16366e+06	941050	1.43867e+06	2.14259e+06	1.13318e+06	1.46041e+06	1.56083e+06	2.01954e+06
Arachidonoylcarnitine (Car(20:4))	3.67	level1			448.341	233.6	POS	6.62767e+06	5.66532e+06	6.751e+06	5.68062e+06	6.25938e+06	8.97128e+06	1.36278e+07	9.8642e+06	1.06884e+07	1.39061e+07	1.7197e+07	1.23843e+07	7.84662e+06	6.68711e+06	5.8466e+06	7.07075e+06	5.00516e+06	7.66293e+06	5.06353e+06	8.56479e+06	9.66011e+06	5.47081e+06	5.66296e+06	8.04058e+06	8.0786e+06	7.76618e+06	8.35072e+06	7.97778e+06
[(5E)-3,4-dihydroxy-10-oxo-2-propyl-2,3,4,7,8,9-hexahydrooxecin-9-yl] (2E,4E)-hexa-2,4-dienoate	3.67	level1			337.166	208.2	NEG	1.10843e+07	1.63021e+07	9.15226e+06	1.21842e+07	1.26639e+07	1.24559e+07	1.11712e+07	1.10349e+07	1.42135e+07	8.50404e+06	5.75946e+06	9.93155e+06	6.67915e+06	8.46172e+06	9.88778e+06	7.011e+06	6.45337e+06	5.99911e+06	8.62811e+06	9.14487e+06	9.15544e+06	1.12298e+07	1.10548e+07	1.17378e+07	9.39809e+06	1.15065e+07	9.19027e+06	7.02386e+06
Butylphthalide	3.67	level1			191.107	200.6	POS	1.40229e+07	1.09681e+07	1.34678e+07	1.38149e+07	1.19592e+07	1.14629e+07	1.51751e+07	1.57446e+07	1.55379e+07	1.33489e+07	1.41661e+07	1.56845e+07	1.0093e+07	1.25429e+07	1.42762e+07	9.88126e+06	9.94538e+06	9.63807e+06	1.68396e+07	1.555e+07	1.79872e+07	1.50916e+07	1.53909e+07	1.49136e+07	1.4617e+07	1.62648e+07	1.63258e+07	1.19288e+07
Citric Acid	3.67	level1			173.009	57.6	NEG	5.03404e+06	5.46879e+06	3.09039e+06	5.95988e+06	5.606e+06	5.08261e+06	6.51222e+06	4.76043e+06	6.40333e+06	4.94289e+06	5.10956e+06	347438	7.3085e+06	9.59937e+06	8.19304e+06	9.35525e+06	3.37391e+06	8.62077e+06	7.06503e+06	8.49943e+06	9.84641e+06	8.65876e+06	7.19219e+06	6.73119e+06	6.22471e+06	6.50737e+06	2.32518e+06	3.6255e+06
methyl (E)-8-(4-hydroxy-6-methoxy-7-methyl-3-oxo-1H-2-benzofuran-5-yl)-2,6-dimethyloct-6-enoate	3.67	level1			375.185	252.4	NEG	4.02076e+07	4.13177e+07	4.74614e+07	4.51168e+07	3.79167e+07	3.58733e+07	2.51685e+07	5.15766e+07	3.12076e+07	2.34758e+07	3.45929e+07	3.3438e+07	2.07034e+07	1.81212e+07	1.442e+07	1.36356e+07	2.20306e+07	2.00066e+07	2.03193e+07	2.24851e+07	1.60257e+07	1.91671e+07	1.71803e+07	1.20895e+07	2.87497e+07	2.60997e+07	2.79538e+07	2.73243e+07
5-(hydroxymethyl)-1-[(Z)-5-hydroxy-3-methyl-pent-3-enyl]-5,8a-dimethyl-4-[(2S,3R,4S,5S)-3,4,5-trihydroxytetrahydropyran-2-yl]oxy-3,4,4a,6,7,8-hexahydronaphthalene-2-carbaldehyde	3.67	level1			467.266	241.2	NEG	1.0634e+07	1.617e+07	1.1352e+07	1.23028e+07	9.54928e+06	1.19141e+07	1.81164e+07	1.66377e+07	1.76626e+07	1.98525e+07	1.70265e+07	1.57668e+07	1.16087e+07	1.06348e+07	1.11796e+07	9.37825e+06	9.47432e+06	8.3268e+06	8.39987e+06	1.55628e+07	1.68054e+07	1.43919e+07	1.40186e+07	1.17471e+07	1.32803e+07	1.30536e+07	1.80078e+07	1.2287e+07
Dehydroandrographolide succinate	3.67	level1			513.211	177	NEG	1.79531e+07	1.8165e+07	1.59608e+07	1.57264e+07	1.79471e+07	1.48705e+07	1.19091e+07	1.13931e+07	9.91053e+06	1.31311e+07	1.32141e+07	6.88207e+06	1.19196e+07	9.55759e+06	8.63118e+06	1.38994e+07	7.40904e+06	9.62184e+06	1.83425e+07	1.94091e+07	1.84505e+07	1.73792e+07	1.76941e+07	2.191e+07	1.17276e+07	1.32699e+07	1.41538e+07	1.52711e+07
(3S)-3-acetoxy-3-[(1R,2R,5R,6R,10S,11S,14S)-11-(3-furyl)-5-(1-hydroxy-1-methyl-ethyl)-2,6,10-trimethyl-3,13-dioxo-12,15-dioxatetracyclo[8.5.0.01,14.02,7]pentadecan-6-yl]propanoic acid	3.67	level1			513.211	177	NEG	1.79531e+07	1.8165e+07	1.59608e+07	1.57264e+07	1.79471e+07	1.48705e+07	1.19091e+07	1.13931e+07	9.91053e+06	1.31311e+07	1.32141e+07	6.88207e+06	1.19196e+07	9.55759e+06	8.63118e+06	1.38994e+07	7.40904e+06	9.62184e+06	1.83425e+07	1.94091e+07	1.84505e+07	1.73792e+07	1.76941e+07	2.191e+07	1.17276e+07	1.32699e+07	1.41538e+07	1.52711e+07
methyl 14-hydroxy-14-(hydroxymethyl)-5,9-dimethyl-tetracyclo[11.2.1.01,10.04,9]hexadecane-5-carboxylate	3.66	level1			349.238	294.6	NEG	3.95769e+06	4.24659e+06	4.42888e+06	4.1899e+06	4.13241e+06	3.80279e+06	4.12722e+06	5.54412e+06	3.70179e+06	5.58912e+06	6.00006e+06	4.55952e+06	4.71091e+06	4.1951e+06	5.42229e+06	5.33764e+06	4.91814e+06	5.6964e+06	6.08031e+06	6.89506e+06	6.00374e+06	4.66975e+06	4.30522e+06	5.23568e+06	4.69883e+06	4.84434e+06	5.04337e+06	5.62256e+06
Eplerenone	3.66	level1			415.211	250.7	POS	5.93549e+07	4.95425e+07	5.89972e+07	7.27589e+07	6.07237e+07	4.70313e+07	6.27013e+07	5.53045e+07	4.9651e+07	4.91861e+07	4.83045e+07	5.80553e+07	4.67127e+07	4.96619e+07	4.94626e+07	5.2389e+07	4.28236e+07	7.44195e+07	4.90597e+07	5.09105e+07	5.50971e+07	4.63475e+07	2.55472e+08	7.06267e+07	6.14755e+07	6.44082e+07	6.46023e+07	6.29708e+07
(2R)-8-ethyl-7-hydroxy-5-methoxy-2-methyl-chroman-4-one	3.66	level1			219.102	189.9	POS	2.58175e+07	2.49753e+07	3.07876e+07	2.91822e+07	2.95584e+07	2.40584e+07	3.40516e+07	2.99373e+07	3.61497e+07	2.3264e+07	3.21146e+07	2.35506e+07	1.49009e+07	1.39743e+07	1.72021e+07	1.35066e+07	1.33911e+07	1.33303e+07	1.00699e+07	1.68977e+07	1.12453e+07	1.15938e+07	1.18204e+07	1.10396e+07	2.17341e+07	2.16318e+07	2.10965e+07	2.02436e+07
NAE(18:1)	3.66	level1			326.305	309.8	POS	2.39463e+07	2.77979e+07	3.0735e+07	3.09787e+07	2.95013e+07	2.2818e+07	2.87991e+07	4.01628e+07	3.304e+07	3.75378e+07	3.49329e+07	3.16836e+07	2.52267e+07	2.15955e+07	2.21241e+07	1.84916e+07	1.72133e+07	1.88698e+07	2.17505e+07	2.4875e+07	2.10317e+07	2.25799e+07	2.47812e+07	2.24591e+07	2.36657e+07	2.88356e+07	2.79771e+07	2.93209e+07
Docosahexaenoic acid (DHA)	3.66	level1			329.247	270.4	POS	8.23281e+06	1.22391e+07	4.89008e+06	9.08524e+06	1.41094e+07	1.30392e+07	2.48186e+07	1.13574e+07	1.17097e+07	5.59562e+06	9.9918e+06	7.39302e+06	1.12929e+07	7.29136e+06	1.07029e+07	9.22047e+06	8.55942e+06	8.96559e+06	9.02874e+06	7.35518e+06	8.74716e+06	9.42344e+06	1.14674e+07	7.93431e+06	7.7968e+06	7.68001e+06	8.39603e+06	1.10012e+07
3-Hydroxymandelic acid	3.66	level1			149.024	74.5	NEG	7.13845e+07	4.36721e+07	2.09329e+07	3.63031e+07	5.25807e+07	3.66179e+07	1.63484e+07	2.58023e+07	1.95799e+07	2.63849e+07	2.60489e+07	2.21162e+07	6.55624e+06	2.61516e+06	7.13026e+06	9.89171e+06	6.78264e+06	5.84732e+06	4.68238e+06	3.52393e+06	7.80788e+06	2.84098e+06	7.36434e+06	4.15798e+06	3.08386e+07	3.00936e+07	2.85611e+07	2.90641e+07
15-Deoxyoxalicine B	3.66	level1			504.24	180.1	POS	2.44178e+06	2.67059e+06	2.65706e+06	3.51427e+06	2.49101e+06	2.10781e+06	2.32532e+06	4.69313e+06	3.32884e+06	3.66541e+06	2.03859e+06	3.30063e+06	1.69818e+06	1.27332e+06	1.59602e+06	2.77437e+06	1.15945e+06	2.19559e+06	3.90345e+06	5.13641e+06	4.90789e+06	5.46179e+06	4.11979e+06	4.55912e+06	2.198e+06	3.06399e+06	3.17766e+06	3.48633e+06
12-Hydroxydodecanoic acid	3.65	level1			215.165	274.8	NEG	4.02061e+06	4.1575e+06	1.33427e+06	4.68759e+06	4.16488e+06	2.3984e+06	6.15643e+06	4.3502e+06	9.77672e+06	6.95996e+06	1.74714e+06	1.50744e+07	1.95077e+07	1.39959e+07	1.58383e+07	1.7409e+07	1.38712e+07	1.26682e+07	8.45624e+06	5.83768e+06	7.0746e+06	1.09066e+07	6.33178e+06	7.21966e+06	8.4111e+06	6.78476e+06	6.90138e+06	9.06281e+06
4-Ethoxybenzoic acid	3.65	level1			165.056	167.7	NEG	2.53432e+08	2.54126e+08	2.06923e+08	2.76253e+08	3.05953e+08	2.58627e+08	2.00557e+08	2.36578e+08	2.06666e+08	2.47692e+08	1.66607e+08	2.02671e+08	3.13552e+08	2.78276e+08	2.98522e+08	3.36307e+08	3.0596e+08	3.10298e+08	2.18424e+08	2.56373e+08	2.42259e+08	2.65061e+08	2.06155e+08	2.06872e+08	2.60245e+08	2.57378e+08	2.54174e+08	2.49058e+08
1,7-Dimethyluric acid	3.65	level1			195.051	75.9	NEG	5.93523e+07	4.75766e+07	3.6601e+07	6.80412e+07	5.31681e+07	4.47468e+07	5.11888e+07	1.72297e+07	2.62691e+07	1.71283e+07	4.4432e+07	3.95035e+07	5.15098e+07	6.9029e+07	6.32235e+07	6.0735e+07	9.13579e+07	5.57393e+07	6.37047e+07	2.73847e+07	3.32195e+07	7.00941e+07	6.44063e+07	4.52407e+07	5.36082e+07	5.59197e+07	5.44444e+07	3.33219e+07
Retinoic acid (Vitamin A acid)	3.65	level1			301.216	258.6	POS	5.56883e+07	4.99252e+07	1.6995e+08	3.94613e+07	5.43526e+07	5.88891e+07	5.75684e+07	6.36853e+07	1.73296e+08	7.11317e+07	5.55417e+07	5.67613e+07	1.45412e+08	3.09556e+07	5.80075e+07	3.31936e+07	1.42661e+08	1.41119e+08	5.39942e+07	5.61405e+07	5.08807e+07	5.86931e+07	5.80664e+07	5.24202e+07	5.206e+07	5.91161e+07	6.09398e+07	5.90769e+07
Oxatomide	3.65	level1			425.237	247.7	NEG	9.41369e+06	9.91176e+06	9.43436e+06	1.1846e+07	8.72738e+06	1.01129e+07	9.9949e+06	8.16855e+06	1.20514e+07	8.38702e+06	5.67315e+06	7.89e+06	8.35195e+06	6.21869e+06	1.09032e+07	7.75691e+06	4.50037e+06	6.07073e+06	4.13712e+06	6.46757e+06	6.02874e+06	4.35859e+06	4.85299e+06	5.49831e+06	8.02039e+06	7.73011e+06	7.53583e+06	6.26892e+06
C-021	3.65	level1			466.318	241.8	NEG	5.0966e+06	3.97568e+06	4.45974e+06	3.90597e+06	4.58541e+06	5.14246e+06	7.37175e+06	9.0549e+06	6.39415e+06	8.72446e+06	6.75645e+06	6.90704e+06	2.07199e+06	1.09825e+07	2.82476e+06	6.39941e+06	2.8627e+06	3.90668e+06	1.44895e+07	2.241e+06	2.8059e+06	4.59066e+06	2.98778e+06	3.00734e+06	3.77011e+06	4.16894e+06	4.29773e+06	3.8352e+06
Atrazine	3.65	level1			216.102	194	POS	1.47253e+07	1.81427e+07	2.08244e+07	1.74652e+07	2.02985e+07	1.47601e+07	1.8062e+07	3.08069e+07	1.50627e+07	2.70068e+07	2.34439e+07	2.13513e+07	7.60929e+06	7.30533e+06	6.12397e+06	1.02185e+07	8.43992e+06	1.12669e+07	1.15573e+07	1.50788e+07	1.39875e+07	1.02495e+07	9.472e+06	1.55715e+07	1.49308e+07	1.56762e+07	1.57117e+07	1.55405e+07
Succinyladenosine	3.65	level1			382.101	63.3	NEG	1.46729e+07	1.40866e+07	1.23832e+07	1.45042e+07	1.3307e+07	1.70383e+07	1.32807e+07	1.7231e+07	1.4963e+07	1.48331e+07	1.37553e+07	1.28349e+07	1.87533e+07	2.20327e+07	2.36126e+07	2.11833e+07	1.51861e+07	1.79998e+07	1.60873e+07	1.85795e+07	1.80866e+07	1.80043e+07	1.7379e+07	1.66392e+07	1.69397e+07	1.72139e+07	1.76363e+07	1.73483e+07
5-(2-hydroxy-4-methylphenyl)-6-methylheptan-2-one	3.65	level1			235.169	217.7	POS	4.98866e+07	4.6446e+07	3.24982e+07	3.75173e+07	4.59975e+07	5.22072e+07	4.90526e+07	5.58481e+07	5.17506e+07	5.06987e+07	4.39953e+07	6.5814e+07	1.88851e+07	2.1648e+07	3.74398e+07	1.6954e+07	2.3388e+07	1.89378e+07	5.12796e+07	3.95578e+07	5.09258e+07	3.93463e+07	4.36971e+07	4.5664e+07	4.81087e+07	4.18613e+07	4.85e+07	4.85324e+07
Ginsenoside C-K	3.65	level1			621.437	342.9	NEG	1.18719e+07	1.26578e+07	1.1047e+07	1.38509e+07	1.30014e+07	1.13622e+07	1.10333e+07	1.0822e+07	1.06085e+07	1.28451e+07	1.17352e+07	1.2024e+07	1.36708e+07	1.14674e+07	1.11537e+07	1.12594e+07	1.26854e+07	9.51562e+06	1.07109e+07	1.17146e+07	9.74655e+06	1.18179e+07	1.06325e+07	1.28441e+07	9.47571e+06	1.1913e+07	1.29276e+07	1.38834e+07
[(1R,4Z,9S)-11,11-dimethyl-8-methylene-3-oxo-4-bicyclo[7.2.0]undec-4-enyl]methyl acetate	3.65	level1			277.18	202.6	POS	1.34827e+07	1.29362e+07	1.11566e+07	1.43721e+07	1.05293e+07	1.34879e+07	1.43186e+07	1.31895e+07	1.55799e+07	1.15977e+07	1.38255e+07	1.40156e+07	7.2377e+06	7.4129e+06	7.7156e+06	7.45239e+06	6.78742e+06	6.69455e+06	9.98213e+06	8.96743e+06	1.17257e+07	1.09558e+07	1.26018e+07	1.4947e+07	1.07366e+07	1.24631e+07	1.0828e+07	1.05895e+07
9-cis-Retinoic acid	3.64	level1			301.216	258.6	POS	5.56883e+07	4.99252e+07	1.6995e+08	3.94613e+07	5.43526e+07	5.88891e+07	5.75684e+07	6.36853e+07	1.73296e+08	7.11317e+07	5.55417e+07	5.67613e+07	1.45412e+08	3.09556e+07	5.80075e+07	3.31936e+07	1.42661e+08	1.41119e+08	5.39942e+07	5.61405e+07	5.08807e+07	5.86931e+07	5.80664e+07	5.24202e+07	5.206e+07	5.91161e+07	6.09398e+07	5.90769e+07
Linoleamide	3.64	level1			280.263	254.1	POS	1.16082e+08	1.99721e+08	1.38653e+08	1.13221e+08	9.56181e+07	1.45631e+08	7.97828e+07	1.11954e+08	8.60113e+07	9.47312e+07	9.0523e+07	1.24332e+08	1.81502e+08	2.054e+08	1.82153e+08	1.76868e+08	1.48875e+08	1.40105e+08	1.61835e+08	2.32643e+08	2.19493e+08	1.62503e+08	1.68084e+08	1.85911e+08	1.46077e+08	1.44822e+08	1.45455e+08	1.43881e+08
Ecabet (sodium)	3.64	level1			379.161	199.3	NEG	9.56785e+07	8.89369e+07	8.38666e+07	9.32458e+07	8.4907e+07	8.81312e+07	1.06548e+08	1.03814e+08	1.24198e+08	9.48307e+07	9.32133e+07	7.86284e+07	7.79705e+07	7.22896e+07	8.11911e+07	7.98012e+07	6.39724e+07	6.66558e+07	1.00179e+08	1.10871e+08	1.19107e+08	1.27968e+08	1.07608e+08	1.05914e+08	9.73333e+07	9.39826e+07	9.65244e+07	9.60883e+07
O6-Benzylguanine	3.64	level1			222.077	158	NEG	3.29539e+07	4.8671e+07	2.93596e+07	3.41603e+07	4.67662e+07	3.00834e+07	2.29448e+07	3.23626e+07	2.29507e+07	3.13894e+07	2.33892e+07	2.17487e+07	2.36533e+07	2.39554e+07	2.50652e+07	2.91478e+07	2.40523e+07	2.94701e+07	2.33335e+07	2.7787e+07	2.36274e+07	2.53274e+07	1.79056e+07	2.76725e+07	2.64716e+07	2.66251e+07	2.8491e+07	2.70408e+07
Myristoylcarnitine	3.64	level1			372.31	308.5	POS	6.96333e+06	6.81615e+06	6.91805e+06	6.79707e+06	6.54204e+06	6.41653e+06	7.12191e+06	8.47349e+06	9.10291e+06	7.79753e+06	7.26277e+06	8.00282e+06	2.36127e+07	7.18904e+06	2.35889e+07	2.01456e+07	5.29406e+06	1.84391e+07	8.00182e+06	8.58459e+06	8.776e+06	8.24557e+06	8.53774e+06	7.97424e+06	1.31701e+07	6.56935e+06	1.28918e+07	1.34256e+07
6-[(2E)-3,7-dimethylocta-2,6-dienyl]-7-hydroxy-chromen-2-one	3.64	level1			297.153	303.8	NEG	1.26126e+08	1.8198e+08	1.48807e+08	1.50557e+08	1.97132e+08	1.88176e+08	1.51594e+08	2.02762e+08	2.08262e+08	1.76454e+08	1.83819e+08	1.7478e+08	1.31828e+08	7.42529e+07	7.25952e+07	9.7951e+07	1.0105e+08	1.15237e+08	1.34868e+08	1.2454e+08	1.49915e+08	8.35491e+07	1.23068e+08	1.15241e+08	4.65052e+08	4.78873e+08	4.90799e+08	4.82206e+08
Taurolithocholic acid	3.64	level1			482.291	283.4	NEG	2.16482e+06	2.36544e+06	2.81431e+06	2.58319e+06	531556	735671	2.87118e+06	4.98027e+06	3.78762e+06	3.81745e+06	3.54542e+06	4.3399e+06	1.35802e+06	1.32985e+06	1.3159e+06	2.98966e+06	2.25358e+06	1.84763e+06	1.11715e+06	1.86947e+06	1.31966e+06	1.12223e+06	1.78919e+06	1.35437e+06	3.23012e+06	2.00611e+06	3.24438e+06	2.49017e+06
8-[3-oxo-2-[(E)-pent-2-enyl]cyclopenten-1-yl]octanoic acid	3.64	level1			275.2	208.5	POS	7.8481e+07	4.74363e+07	4.22264e+07	5.1557e+07	4.90267e+07	4.92395e+07	4.02822e+07	4.09691e+07	3.74643e+07	4.79944e+07	4.1235e+07	3.78305e+07	3.6902e+07	3.28646e+07	5.38917e+07	6.15186e+07	3.69823e+07	2.89186e+07	3.833e+07	4.81551e+07	4.28692e+07	4.50418e+07	4.01641e+07	4.08539e+07	5.7762e+07	3.94292e+07	4.07016e+07	4.28996e+07
Cyclamic acid	3.63	level1			178.051	138.1	NEG	5.38628e+06	5.53719e+06	4.61189e+06	6.17078e+06	5.02239e+06	4.94564e+06	5.36307e+06	6.59712e+06	5.4534e+06	6.02142e+06	5.0006e+06	8.51147e+06	2.2114e+07	2.18797e+07	2.20287e+07	1.267e+07	1.19082e+07	1.53998e+07	6.21691e+06	7.10622e+06	7.4487e+06	1.22854e+07	7.97371e+06	5.96894e+06	1.17691e+07	8.57174e+06	9.10488e+06	8.12237e+06
NG 52	3.63	level1			347.139	191.4	POS	1.91747e+07	2.53423e+07	2.60702e+07	2.8078e+07	2.95965e+07	1.76147e+07	1.02391e+07	1.91047e+07	1.07305e+07	1.77942e+07	1.3327e+07	9.34305e+06	3.74189e+07	2.44999e+07	2.37454e+07	4.71609e+07	3.29259e+07	4.13977e+07	1.79323e+07	2.24117e+07	1.64405e+07	1.90955e+07	1.09011e+07	2.53713e+07	2.35766e+07	2.39484e+07	2.39749e+07	2.37399e+07
Uridine	3.63	level1			243.062	82.1	NEG	1.73468e+07	2.05546e+07	3.59951e+07	3.35952e+07	7.9287e+06	3.01485e+07	6.31834e+06	2.0604e+07	1.58029e+07	6.59783e+06	2.73748e+07	1.60125e+07	1.57129e+07	1.64797e+07	1.54549e+07	4.77497e+06	1.31041e+07	1.35773e+07	1.18274e+07	1.92463e+07	1.48851e+07	1.86834e+07	2.53022e+07	4.66689e+06	1.79504e+07	2.9368e+07	1.61948e+07	1.72385e+07
Dihydrouracil	3.63	level1			115.054	30.2	POS	4.31429e+07	1.34517e+07	1.62698e+07	2.46774e+07	2.31561e+07	2.44109e+07	1.17167e+07	2.44151e+07	1.86891e+07	1.89011e+07	2.33326e+07	1.82764e+07	9.04476e+06	1.47863e+07	2.33992e+07	1.97407e+07	1.71464e+07	1.9826e+07	2.87704e+07	2.83994e+07	2.8682e+07	1.85706e+07	1.12198e+07	3.28422e+07	1.37944e+07	3.34517e+07	3.14148e+07	4.06945e+07
2,4-dihydroxy-6-methyl-3-[(E)-3-methyl-5-[(1S,2R,6R)-1,2,6-trimethyl-3-oxo-cyclohexyl]pent-2-enyl]benzaldehyde	3.63	level1			371.225	331.6	NEG	3.89111e+06	4.15887e+06	6.65298e+06	7.90984e+06	4.92322e+06	3.33034e+06	3.35752e+06	7.23161e+06	4.435e+06	6.59145e+06	6.4163e+06	4.701e+06	1.80918e+06	1.80597e+06	1.64231e+06	2.07366e+06	1.07972e+06	1.90335e+06	2.4964e+06	2.8118e+06	1.75126e+06	2.34094e+06	2.07915e+06	2.83274e+06	3.13889e+06	3.7918e+06	3.9417e+06	4.17066e+06
Posaconazole	3.63	level1			701.334	278.9	POS	1.39787e+07	1.51478e+07	1.77429e+07	1.7804e+07	1.31992e+07	1.75817e+07	7.80978e+06	1.83838e+07	1.76544e+07	1.94692e+07	1.90148e+07	1.73808e+07	1.77893e+07	1.45932e+07	1.3715e+07	1.83397e+07	1.64844e+07	1.8093e+07	1.32594e+07	1.28004e+07	1.60616e+07	1.66267e+07	1.42305e+07	1.5537e+07	1.62921e+07	1.72819e+07	1.43363e+07	1.64003e+07
2-Hydroxy-4-methoxybenzaldehyde	3.62	level1			151.04	167.1	NEG	2.31364e+08	2.42315e+08	2.73217e+08	2.63397e+08	2.35319e+08	2.04656e+08	1.87903e+08	2.4846e+08	1.89439e+08	2.07411e+08	2.13917e+08	2.13307e+08	1.62534e+08	1.81564e+08	1.67635e+08	1.84674e+08	1.46382e+08	1.71472e+08	2.03481e+08	2.39863e+08	2.2282e+08	1.76976e+08	1.55897e+08	2.05158e+08	2.21195e+08	2.11881e+08	2.05032e+08	2.05806e+08
Tramiprosate	3.62	level1			138.02	38.2	NEG	7.69884e+07	2.74725e+07	8.89709e+07	1.58479e+07	1.30776e+07	3.45347e+07	4.14235e+07	2.50479e+07	1.74056e+07	9.93325e+07	1.82307e+07	3.83182e+07	6.10644e+07	9.09975e+07	6.77713e+07	1.35262e+07	7.15459e+07	7.48595e+07	9.46848e+07	9.6634e+07	4.87166e+07	1.32078e+07	1.04261e+08	8.81434e+07	3.00503e+07	9.29349e+07	2.80937e+07	9.13097e+07
Dipyridamole	3.62	level1			505.328	165.6	POS	9.76474e+06	2.24121e+07	1.12027e+07	2.27022e+07	5.83542e+07	2.5544e+07	1.33853e+07	2.9239e+07	2.57839e+07	2.6896e+07	2.76606e+07	2.23707e+07	6.62096e+06	5.97988e+06	1.09575e+07	7.6398e+06	9.09417e+06	5.05364e+06	1.81897e+07	1.94006e+07	2.20072e+07	2.04328e+07	2.29709e+07	2.61966e+07	2.65863e+07	2.15982e+07	2.13323e+07	1.94096e+07
Altretamine	3.61	level1			193.159	208.5	POS	5.84043e+07	5.3061e+07	5.23064e+07	5.23298e+07	5.17492e+07	5.98086e+07	6.63245e+07	5.46941e+07	7.08403e+07	4.86972e+07	5.57757e+07	5.07088e+07	4.08527e+07	4.82205e+07	4.87095e+07	4.14476e+07	3.73182e+07	4.11255e+07	7.00199e+07	7.28709e+07	7.61867e+07	7.17722e+07	6.89999e+07	6.38099e+07	5.69861e+07	5.75619e+07	5.61719e+07	5.7055e+07
3',4,4,7a-tetramethyl-3-oxo-3'-vinyl-spiro[3a,5,6,7-tetrahydroisobenzofuran-1,6'-cyclohexene]-1'-carboxylic acid	3.61	level1			331.186	275.5	NEG	808482	709774	720316	636152	1.02143e+06	430067	432747	698472	439688	1.76483e+06	408236	432412	899445	822533	711467	783858	727085	734470	209685	692147	311463	863333	451113	629860	617713	684606	549291	550735
Theobromine	3.6	level1			179.056	25	NEG	3.01553e+07	2.86698e+07	3.43904e+07	3.06772e+07	3.38766e+07	3.04958e+07	4.47703e+07	4.38317e+07	4.33436e+07	3.93063e+07	3.97109e+07	4.25852e+07	3.39957e+07	3.57114e+07	3.7069e+07	3.28574e+07	3.13174e+07	3.36826e+07	3.97411e+07	3.47141e+07	3.76517e+07	3.49245e+07	3.63911e+07	3.60897e+07	3.7833e+07	3.57697e+07	3.5962e+07	3.63388e+07
Norfloxacin	3.6	level1			320.139	200.5	POS	2.8055e+07	2.90659e+07	1.159e+07	1.88498e+07	1.56652e+07	1.51653e+07	1.59774e+07	2.0573e+07	2.04419e+07	1.9092e+07	1.10944e+07	1.54113e+07	5.05284e+07	6.25181e+07	4.75682e+07	5.55585e+07	4.24545e+07	7.29102e+07	1.70384e+07	1.17625e+07	1.51248e+07	1.69467e+07	1.17309e+07	1.06362e+07	3.63035e+07	2.40582e+07	3.78897e+07	3.67607e+07
Tomatidine	3.6	level1			416.356	269.7	POS	3.40396e+06	1.83831e+06	4.9326e+06	4.27956e+06	3.96151e+06	5.99793e+06	6.18459e+06	2.65983e+06	4.53128e+06	4.96765e+06	6.19511e+06	8.24021e+06	0	0	971932	0	2.05854e+06	489055	2.6729e+06	1.66791e+06	2.07973e+06	2.48721e+06	2.52142e+06	3.57238e+06	2.78484e+06	3.38015e+06	3.17118e+06	2.93942e+06
Dodecyl gallate	3.59	level1			337.205	327	NEG	5.00243e+07	6.23931e+07	5.14821e+07	5.56656e+07	3.82432e+07	4.43358e+07	1.86392e+07	2.264e+07	1.5089e+07	1.73909e+07	1.88568e+07	1.80788e+07	4.16011e+07	3.29087e+07	3.05254e+07	3.06637e+07	2.87909e+07	1.93205e+07	1.3296e+07	2.25956e+07	1.85323e+07	2.01151e+07	3.46174e+07	2.21252e+07	3.01572e+07	3.03939e+07	3.41613e+07	3.9515e+07
Zearalanone	3.59	level1			319.158	258.9	NEG	9.05169e+06	7.86992e+06	7.73089e+06	6.9246e+06	7.86851e+06	8.19862e+06	5.78408e+06	4.56967e+06	3.78474e+06	4.78262e+06	5.76104e+06	5.01354e+06	6.18513e+06	4.64707e+06	4.66161e+06	4.06228e+06	5.10308e+06	2.92737e+06	1.07929e+07	8.05962e+06	8.57248e+06	1.05123e+07	7.26908e+06	9.28285e+06	6.92586e+06	6.37235e+06	5.9439e+06	7.41439e+06
Hydroxychloroquine	3.58	level1			334.167	214.1	NEG	4.70376e+07	6.48932e+07	6.13673e+07	5.76967e+07	6.06652e+07	4.55332e+07	3.2174e+07	6.56115e+07	3.75953e+07	6.24767e+07	3.95448e+07	3.37952e+07	4.61654e+07	4.22934e+07	4.10391e+07	6.3527e+07	5.21013e+07	5.61599e+07	3.22872e+07	4.98807e+07	4.2379e+07	3.39126e+07	3.21799e+07	5.45411e+07	4.87072e+07	4.90731e+07	4.90575e+07	4.82918e+07
PC(16:0/18:1(9Z))	3.58	level1			742.582	279.5	POS	2.8621e+06	7.63033e+06	4.0296e+06	541054	0	7.56758e+06	4.92639e+06	3.32677e+06	5.00798e+06	5.38121e+06	7.07135e+06	2.08912e+06	0	6.70157e+06	5.23393e+06	4.60873e+06	7.12165e+06	2.91175e+06	2.62585e+06	2.97326e+06	4.40202e+06	3.93119e+06	5.06274e+06	0	3.98041e+06	2.70724e+06	3.8565e+06	7.61619e+06
IS1	3.56	level1			176.069	195.6	NEG	2.02057e+07	2.1658e+07	2.25462e+07	2.08908e+07	2.11869e+07	2.1633e+07	2.20758e+07	2.11962e+07	1.99364e+07	2.21552e+07	2.21538e+07	2.37865e+07	1.85286e+07	2.00667e+07	1.81656e+07	1.77612e+07	2.17845e+07	1.89614e+07	2.12844e+07	1.99943e+07	1.94794e+07	2.0103e+07	2.12578e+07	2.15596e+07	2.12837e+07	2.05544e+07	2.09233e+07	2.02495e+07
Manzamine A (hydrochloride)	3.56	level1			531.344	206.4	POS	4.48266e+06	3.91444e+06	3.94888e+06	3.79755e+06	4.08662e+06	4.47622e+06	5.45655e+06	4.36536e+06	4.37765e+06	4.72942e+06	5.20641e+06	4.49409e+06	3.6655e+06	3.79545e+06	3.75654e+06	3.95215e+06	4.0751e+06	3.93391e+06	3.91126e+06	5.41167e+06	4.55641e+06	4.20327e+06	4.72156e+06	4.33832e+06	3.26272e+06	4.28129e+06	3.85652e+06	4.46165e+06
8-[(2E)-3,7-dimethylocta-2,6-dienyl]-7-hydroxy-chromen-2-one	3.55	level1			297.153	303.8	NEG	1.26126e+08	1.8198e+08	1.48807e+08	1.50557e+08	1.97132e+08	1.88176e+08	1.51594e+08	2.02762e+08	2.08262e+08	1.76454e+08	1.83819e+08	1.7478e+08	1.31828e+08	7.42529e+07	7.25952e+07	9.7951e+07	1.0105e+08	1.15237e+08	1.34868e+08	1.2454e+08	1.49915e+08	8.35491e+07	1.23068e+08	1.15241e+08	4.65052e+08	4.78873e+08	4.90799e+08	4.82206e+08
7-Ethylcamptothecin	3.54	level1			377.146	161	POS	5.33429e+07	4.94579e+07	5.14016e+07	4.83146e+07	4.88856e+07	5.53145e+07	5.54696e+07	5.57302e+07	5.90225e+07	5.31141e+07	5.37066e+07	5.79104e+07	4.01038e+07	4.46087e+07	4.35046e+07	4.25898e+07	4.38743e+07	4.12937e+07	4.2796e+07	4.75041e+07	4.88931e+07	4.52972e+07	4.86011e+07	4.7584e+07	4.68442e+07	4.82751e+07	4.96302e+07	4.903e+07
(9a-methyl-2',3-dioxo-spiro[4,5,5a,7,8,9-hexahydro-1H-benzo[e]isobenzofuran-6,3'-oxetane]-5-yl) acetate	3.54	level1			301.111	229.9	NEG	1.10526e+07	8.39119e+06	8.81888e+06	1.02521e+07	7.61552e+06	1.17027e+07	1.55774e+07	1.29232e+07	1.59966e+07	1.02237e+07	1.08694e+07	1.2267e+07	1.3641e+07	1.96047e+07	1.97883e+07	1.81974e+07	1.32979e+07	1.66869e+07	1.99992e+07	1.75158e+07	2.52418e+07	2.3472e+07	1.84346e+07	2.07509e+07	1.30512e+07	1.39994e+07	1.72342e+07	1.44543e+07
Val-Met	3.54	level1			231.113	52.3	POS	2.80611e+06	8.01046e+06	3.84277e+06	8.22269e+06	556906	7.99201e+06	1.16224e+07	1.19676e+07	1.30991e+07	1.08975e+07	9.18667e+06	1.11678e+07	3.86356e+07	3.99791e+07	4.138e+07	4.84752e+07	3.37771e+07	3.42984e+07	9.74013e+06	1.4191e+07	1.32819e+07	1.91494e+07	1.86212e+07	1.04049e+07	1.87625e+07	1.84224e+07	1.8703e+07	1.96762e+07
7-[2-(2-hydroxy-5-oxo-2H-furan-3-yl)ethyl]-3,3a,6,7-tetramethyl-4,5,6,7a-tetrahydro-1H-indene-2-carbaldehyde	3.53	level1			331.186	275.5	NEG	808482	709774	720316	636152	1.02143e+06	430067	432747	698472	439688	1.76483e+06	408236	432412	899445	822533	711467	783858	727085	734470	209685	692147	311463	863333	451113	629860	617713	684606	549291	550735
N-(1-benzyl-2-hydroxy-ethyl)benzamide	3.53	level1			236.105	252.4	NEG	2.27801e+07	2.21573e+07	1.76118e+07	2.12748e+07	1.6063e+07	1.79678e+07	2.79477e+07	1.5867e+07	1.61267e+07	2.89652e+07	2.97221e+07	1.6155e+07	3.23082e+07	1.95241e+07	1.80372e+07	2.61964e+07	2.27451e+07	1.68266e+07	1.90735e+07	2.55585e+07	2.00069e+07	2.63717e+07	1.52133e+07	2.52112e+07	1.34356e+07	1.30374e+07	1.36377e+07	1.392e+07
GSK 650394	3.52	level1			381.156	235.9	NEG	2.07746e+07	1.73648e+07	1.44521e+07	2.16988e+07	2.05889e+07	2.04318e+07	2.8732e+07	3.31327e+07	4.20548e+07	3.10082e+07	2.56785e+07	1.62675e+07	2.31934e+07	1.91556e+07	2.41338e+07	2.73103e+07	1.79569e+07	1.44143e+07	2.10553e+07	3.24754e+07	3.01712e+07	2.85916e+07	3.34117e+07	2.96667e+07	3.04554e+07	2.88173e+07	2.46015e+07	3.12754e+07
Flavin mononucleotide (FMN)	3.52	level1			437.091	187.1	NEG	8.49179e+06	6.55388e+06	9.67946e+06	8.27872e+06	9.28142e+06	1.47228e+07	1.19971e+07	8.15841e+06	1.03211e+07	7.18397e+06	1.31099e+07	1.49618e+07	3.93122e+06	1.25623e+07	1.36611e+07	7.37645e+06	5.37315e+06	8.65795e+06	2.84627e+06	4.90108e+06	6.65692e+06	3.96033e+06	7.46138e+06	3.98078e+06	9.02239e+06	8.95542e+06	9.34547e+06	9.14053e+06
[(7R,8R,10R,13S,17R)-17-(3-furyl)-4,4,8,10,13-pentamethyl-3,16-dioxo-6,7,9,11,12,17-hexahydro-5H-cyclopenta[a]phenanthren-7-yl] acetate	3.52	level1			449.239	228	NEG	9.94906e+06	1.08567e+07	7.96349e+06	9.00423e+06	8.0427e+06	1.16955e+07	1.01247e+07	8.9224e+06	1.02058e+07	6.26069e+06	1.13857e+07	7.83925e+06	1.1416e+07	1.32588e+07	1.42484e+07	1.26189e+07	1.055e+07	1.20881e+07	2.20009e+07	2.63778e+07	3.10318e+07	2.43185e+07	2.00386e+07	2.59068e+07	1.41334e+07	1.42429e+07	1.43202e+07	1.45686e+07
7-Ketocholesterol	3.51	level1			383.326	265.1	POS	7.8246e+06	8.59424e+06	1.02094e+07	8.60068e+06	8.22944e+06	7.67973e+06	1.47175e+07	1.84905e+07	1.31575e+07	1.44265e+07	1.33708e+07	1.327e+07	5.5264e+06	7.26097e+06	6.47254e+06	5.50978e+06	4.37724e+06	4.66505e+06	7.00572e+06	6.82703e+06	9.27787e+06	8.15899e+06	7.55054e+06	7.79386e+06	8.72995e+06	9.60669e+06	9.21304e+06	9.95923e+06
SB 204741	3.5	level1			267.066	176.4	NEG	2.08158e+06	4.08658e+06	2.63347e+06	2.01011e+06	2.16266e+06	3.02303e+06	2.03581e+06	4.50353e+06	2.43089e+06	2.8695e+06	2.35777e+06	2.87813e+06	6.18735e+06	4.39199e+06	6.25284e+06	7.81096e+06	6.1333e+06	4.40033e+06	1.91722e+06	1.74337e+06	2.26407e+06	1.80549e+06	2.09795e+06	1.48056e+06	4.21677e+06	4.28795e+06	3.28647e+06	4.20213e+06
Arginine	3.5	level1			175.123	37.6	POS	3.851e+07	5.97807e+07	4.44871e+07	5.56635e+07	6.9215e+07	6.11695e+07	4.90014e+07	5.39197e+07	4.86182e+07	5.37139e+07	3.66427e+07	3.69306e+07	7.18101e+07	6.73618e+07	8.99249e+07	7.93534e+07	5.61049e+07	8.37028e+07	7.46409e+07	9.71089e+07	8.72884e+07	1.0597e+08	8.33763e+07	8.3989e+07	9.65094e+07	8.05396e+07	5.93203e+07	6.18835e+07
Luzindole	3.49	level1			273.135	186.4	NEG	1.05373e+07	9.56902e+06	1.13905e+07	1.00937e+07	1.05591e+07	1.00335e+07	1.05329e+07	1.21938e+07	9.2516e+06	1.19222e+07	1.23254e+07	1.16812e+07	6.27247e+06	6.65308e+06	5.30779e+06	7.09515e+06	8.01477e+06	6.49605e+06	6.90799e+06	7.4517e+06	8.29426e+06	7.5306e+06	8.82152e+06	9.25182e+06	8.73741e+06	8.86718e+06	9.23589e+06	8.78869e+06
Bifonazole	3.48	level1			309.135	190	NEG	1.18772e+07	1.03023e+07	9.14148e+06	1.10682e+07	1.08645e+07	1.19549e+07	1.59121e+07	1.47143e+07	1.76279e+07	1.16927e+07	2.5718e+07	1.23729e+07	8.02649e+06	8.35384e+06	1.39783e+07	7.74692e+06	6.52616e+06	7.51658e+06	1.67029e+07	2.00782e+07	1.27913e+07	1.04776e+07	1.31961e+07	1.14021e+07	1.24565e+07	1.36567e+07	1.33046e+07	1.09728e+07
Biotin	3.48	level1			245.092	174.2	POS	3.62291e+08	3.90962e+08	4.18489e+08	4.07326e+08	3.917e+08	3.23802e+08	2.50706e+08	2.91256e+08	2.51836e+08	2.97859e+08	2.86138e+08	2.24464e+08	4.92888e+08	4.22105e+08	4.3839e+08	4.85663e+08	4.21857e+08	4.33512e+08	3.4889e+08	3.99294e+08	2.99735e+08	3.35331e+08	3.12339e+08	2.7825e+08	3.59808e+08	3.65149e+08	3.63714e+08	3.62052e+08
(E)-5-[(1S,4aR,8aR)-2-formyl-5,5,8a-trimethyl-1,4,4a,6,7,8-hexahydronaphthalen-1-yl]-3-(acetoxymethyl)pent-2-enoic acid	3.47	level1			375.212	247.2	NEG	5.15102e+06	4.74073e+06	5.57391e+06	3.1862e+06	6.1368e+06	7.10416e+06	4.97057e+06	5.6137e+06	3.41878e+06	4.97894e+06	5.00453e+06	7.72665e+06	3.37702e+06	4.64866e+06	4.8322e+06	3.58487e+06	3.63323e+06	3.7973e+06	3.76322e+06	5.09649e+06	4.64203e+06	3.6758e+06	5.79616e+06	4.19501e+06	4.76074e+06	5.681e+06	5.22018e+06	5.03277e+06
His-Asp	3.43	level1			271.108	62.1	POS	3.30914e+06	3.95797e+06	4.04286e+06	4.8405e+06	3.05045e+06	2.32114e+06	1.91e+06	3.51036e+06	3.00293e+06	3.98983e+06	2.88177e+06	2.43252e+06	6.68712e+06	6.16887e+06	5.71747e+06	3.88023e+06	2.09654e+06	5.23419e+06	6.83912e+06	6.96434e+06	5.61991e+06	6.55675e+06	5.03981e+06	5.14523e+06	3.97293e+06	4.5739e+06	4.03231e+06	5.35339e+06
Melitracen (hydrochloride)	3.42	level1			292.211	176.8	POS	7.37482e+07	7.3177e+07	4.62076e+07	6.81913e+07	5.60267e+07	6.39554e+07	1.03123e+08	9.32074e+07	1.13744e+08	9.57032e+07	9.70743e+07	9.53617e+07	2.48153e+08	2.72675e+08	3.36597e+08	2.51613e+08	4.14335e+08	2.82616e+08	1.58979e+08	1.78613e+08	1.5485e+08	1.41875e+08	2.39673e+08	1.60586e+08	1.64874e+08	1.64496e+08	1.64935e+08	1.58722e+08
N-(omega)-Hydroxyarginine	3.42	level1			191.118	48.5	POS	5.48126e+08	5.23206e+08	3.05052e+08	4.07559e+08	3.55224e+08	5.10157e+08	3.93049e+08	4.17838e+08	4.61433e+08	4.15769e+08	3.30064e+08	4.00325e+08	2.12312e+09	1.59289e+09	1.96839e+09	2.33949e+09	1.82249e+09	2.12659e+09	5.80426e+08	7.69711e+08	7.08412e+08	9.06417e+08	8.04825e+08	4.9443e+08	9.18837e+08	9.03443e+08	9.21033e+08	9.20642e+08
Glycolithocholic acid	3.41	level1			434.32	238.2	POS	2.22912e+06	2.69861e+06	2.70569e+06	2.54207e+06	2.89605e+06	2.75783e+06	2.62882e+06	2.22247e+06	1.75363e+06	2.58895e+06	2.71202e+06	2.68525e+06	2.26639e+06	2.28464e+06	1.46077e+06	2.49489e+06	2.37863e+06	1.9422e+06	2.6082e+06	2.49842e+06	2.20906e+06	2.6817e+06	2.03063e+06	2.85966e+06	2.30426e+06	2.61871e+06	2.525e+06	2.00781e+06
5-[(E)-4-carboxy-3-methyl-but-3-enyl]-3-hydroxy-1,4a-dimethyl-6-methylene-decalin-1-carboxylic acid	3.4	level1			331.186	275.5	NEG	808482	709774	720316	636152	1.02143e+06	430067	432747	698472	439688	1.76483e+06	408236	432412	899445	822533	711467	783858	727085	734470	209685	692147	311463	863333	451113	629860	617713	684606	549291	550735
Gallic acid	2.75	level2			169.014	313.7	NEG	1.42323e+07	3.43298e+07	1.43526e+07	1.62018e+07	2.15781e+07	3.09922e+07	1.45673e+07	2.66449e+07	1.45243e+07	1.54994e+07	1.48843e+07	1.47983e+07	9.80833e+06	2.56731e+07	1.42696e+07	1.2943e+07	2.90591e+07	1.42321e+07	2.73019e+07	2.93981e+07	1.30551e+07	1.2829e+07	3.31933e+07	1.23558e+07	1.34196e+07	1.35737e+07	1.3972e+07	1.31914e+07
Gossypol	2.75	level2			517.187	299.2	NEG	9.89582e+06	7.95341e+06	7.12704e+06	1.19898e+07	1.1057e+07	9.51018e+06	9.9634e+06	9.07563e+06	9.13182e+06	8.88773e+06	9.37679e+06	8.26921e+06	8.67513e+06	7.72635e+06	1.09033e+07	8.41965e+06	7.95135e+06	1.05313e+07	9.92283e+06	7.61366e+06	9.96433e+06	9.20586e+06	1.04529e+07	9.36676e+06	1.10633e+07	9.70769e+06	8.7994e+06	8.16255e+06
Italicene_ether	2.75	level2			221.19	261.9	POS	1.71616e+07	1.66608e+07	1.86558e+07	1.67806e+07	1.90259e+07	1.73756e+07	2.12299e+07	1.97108e+07	1.68092e+07	2.78661e+07	2.15549e+07	1.96868e+07	1.41016e+07	1.25891e+07	1.53237e+07	1.71587e+07	1.51798e+07	1.29601e+07	1.82033e+07	2.51189e+07	1.75084e+07	2.76999e+07	1.65613e+07	1.65718e+07	1.63326e+07	1.80293e+07	1.80308e+07	1.70149e+07
6-methyl-2-(4-methyl-3-cyclohexen-1-yl)-5-hepten-2-ol	2.75	level2			245.19	254	POS	2.50936e+07	2.28712e+07	2.03273e+07	2.29662e+07	2.50234e+07	2.65018e+07	2.92667e+07	3.04622e+07	4.48109e+07	2.89218e+07	2.92316e+07	2.38854e+07	3.02272e+07	2.8027e+07	3.04574e+07	3.09259e+07	2.71335e+07	3.88629e+07	4.08812e+07	2.84361e+07	4.59151e+07	3.1294e+07	2.89896e+07	2.63126e+07	2.61966e+07	2.76549e+07	2.6983e+07	2.94901e+07
Rutaecarpine	2.75	level2			288.113	219	POS	7.0694e+06	5.24717e+06	1.92497e+06	2.48772e+06	2.07989e+06	4.6244e+06	6.04398e+06	6.79489e+06	7.57102e+06	6.13121e+06	2.50161e+06	6.02635e+06	1.7323e+07	1.33555e+07	1.91271e+07	1.9205e+07	2.11768e+07	1.92767e+07	6.47088e+06	6.73809e+06	7.55399e+06	1.15531e+07	6.16945e+06	5.13738e+06	9.47586e+06	9.0615e+06	9.39073e+06	8.9055e+06
2-Isopropylphenol	2.75	level2			137.096	208.3	POS	5.20859e+07	4.45195e+07	5.87957e+07	5.44614e+07	4.70528e+07	6.72827e+07	7.46897e+07	7.40607e+07	1.40018e+08	6.66641e+07	6.31377e+07	5.35154e+07	5.01539e+07	4.62252e+07	4.91433e+07	3.61796e+07	5.09603e+07	4.13625e+07	1.18781e+08	8.06097e+07	7.16201e+07	1.19424e+08	8.37445e+07	8.14492e+07	5.22355e+07	7.11267e+07	5.39168e+07	5.2374e+07
2,6-Dimethyl-1,4-benzenediol	2.75	level2			139.075	192.9	POS	1.86971e+06	2.04047e+06	2.31485e+06	2.22546e+06	1.91368e+06	2.57772e+06	2.20287e+06	2.15611e+06	2.93141e+06	1.91313e+06	2.30862e+06	3.11967e+06	1.69374e+06	2.0089e+06	1.88211e+06	1.98616e+06	1.61831e+06	2.1949e+06	2.66526e+06	2.10346e+06	3.04335e+06	2.63862e+06	2.43921e+06	2.13734e+06	2.19811e+06	2.3854e+06	2.66551e+06	2.49963e+06
Maltol	2.75	level2			127.039	190	POS	5.54006e+07	3.74778e+07	3.46622e+07	5.97337e+07	6.49622e+07	4.41827e+07	4.08317e+07	4.07999e+07	4.0382e+07	3.49542e+07	4.40281e+07	3.35568e+07	3.52725e+07	3.67033e+07	6.02208e+07	4.01255e+07	3.41274e+07	5.25356e+07	5.12675e+07	3.475e+07	5.47144e+07	4.05123e+07	5.62119e+07	4.25487e+07	5.68757e+07	4.75054e+07	3.76828e+07	3.38422e+07
Spiraeoside	2.75	level2			465.103	182.7	POS	6.43037e+06	4.84376e+06	3.93095e+06	3.80719e+06	6.56879e+06	6.9916e+06	6.4624e+06	3.59734e+06	5.76161e+06	4.0244e+06	3.69148e+06	4.62087e+06	8.71456e+06	8.67289e+06	9.45083e+06	7.09543e+06	7.05588e+06	6.39082e+06	4.6226e+06	5.11417e+06	3.93039e+06	2.99938e+06	4.41911e+06	4.05514e+06	5.46078e+06	5.16911e+06	5.71039e+06	5.75449e+06
Pummeline	2.75	level2			272.092	137.9	POS	1.03538e+07	1.22805e+07	1.14417e+07	1.20745e+07	9.80528e+06	1.03428e+07	9.75279e+06	1.53729e+07	1.08481e+07	1.22339e+07	9.90705e+06	9.95463e+06	1.16248e+07	9.11337e+06	9.94683e+06	1.43459e+07	8.95798e+06	1.10089e+07	1.15664e+07	1.37038e+07	1.14626e+07	1.36341e+07	8.98783e+06	1.20692e+07	1.2008e+07	1.2328e+07	1.26708e+07	1.20047e+07
8-Desoxygartanin	2.75	level2			403.15	131.2	POS	109312	0	35739.3	136147	83864	43733.9	35953.2	77690.9	70700.3	75400.6	0	69600.5	2.38546e+06	827018	2.60506e+06	5.10879e+06	1.06611e+06	1.194e+06	72112.5	91791.4	0	0	72250.3	39491.8	138462	409888	505933	357297
Trilobinol	2.75	level2			301.216	9.3	POS	4.40422e+06	2.76758e+06	2.6308e+06	6.87736e+06	7.54279e+06	6.2152e+06	6.39607e+06	3.58027e+06	3.08199e+06	2.67995e+06	3.30527e+06	5.21392e+06	5.6538e+06	3.1728e+06	4.08973e+06	3.54193e+06	5.33762e+06	3.88553e+06	4.09511e+06	3.44864e+06	3.81284e+06	6.37747e+06	3.09724e+06	3.03256e+06	7.11338e+06	6.20593e+06	5.35335e+06	2.02184e+06
Anatabine	2.75	level2			161.107	9.2	POS	4.93553e+07	3.29622e+07	4.34528e+07	1.68184e+07	4.15338e+07	4.98229e+07	5.20565e+07	5.09043e+07	3.08482e+07	3.74297e+07	1.78057e+07	5.37522e+07	4.50588e+07	2.97589e+07	4.672e+07	5.04086e+07	5.68453e+07	2.90514e+07	2.80056e+07	5.5808e+07	5.38133e+07	5.41542e+07	4.84282e+07	4.36207e+07	2.58934e+07	3.70773e+07	2.13715e+07	4.07649e+07
Atractylenolide III	2.75	level2			249.149	246.8	POS	3.53131e+06	3.59263e+06	2.53763e+06	2.78673e+06	3.30964e+06	0	2.83797e+06	3.50739e+06	4.54302e+06	2.97044e+06	3.11575e+06	1.80285e+06	4.83097e+06	3.86805e+06	6.14134e+06	5.47942e+06	2.51709e+06	3.78666e+06	6.05771e+06	6.29239e+06	6.90145e+06	6.82941e+06	5.79494e+06	5.76327e+06	4.24657e+06	4.15414e+06	4.33842e+06	4.6074e+06
Securinine	2.75	level2			218.117	228.3	POS	3.09297e+07	3.50854e+07	2.87117e+07	4.03608e+07	3.67873e+07	3.71061e+07	3.4389e+07	3.55775e+07	3.56353e+07	2.94209e+07	3.08782e+07	2.63163e+07	1.55335e+07	1.80713e+07	1.73698e+07	2.2101e+07	1.47716e+07	1.83075e+07	2.43529e+07	2.3928e+07	2.67712e+07	2.49126e+07	2.24048e+07	2.42087e+07	2.77815e+07	2.73825e+07	2.6691e+07	2.76526e+07
Senecionine	2.75	level2			336.18	214.4	POS	6.50947e+06	8.73929e+06	8.16663e+06	6.56986e+06	8.2749e+06	6.42571e+06	5.99587e+06	7.44897e+06	5.35219e+06	6.51724e+06	6.99042e+06	5.97224e+06	5.22129e+06	5.21917e+06	4.96454e+06	6.67794e+06	7.20563e+06	6.70693e+06	4.25757e+06	6.71252e+06	4.77525e+06	5.00146e+06	4.67288e+06	8.04456e+06	5.62058e+06	5.57281e+06	5.55738e+06	5.45556e+06
Sylvestroside I	2.75	level2			771.26	183.5	POS	1.42864e+06	1.3337e+06	1.00428e+06	1.12494e+06	1.59185e+06	1.68623e+06	2.64143e+06	1.75356e+06	3.34609e+06	1.7075e+06	1.32897e+06	1.39211e+06	978679	970855	1.30078e+06	620188	728511	1.09275e+06	1.28318e+06	1.41731e+06	1.06603e+06	853769	847459	1.1132e+06	1.45364e+06	1.22978e+06	1.55526e+06	1.27499e+06
(S)-5,7-dihydroxy-8-(3-methylbut-2-en-1-yl)-2-phenylchroman-4-one	2.75	level2			325.14	165.6	POS	6.69973e+07	6.63479e+07	7.19513e+07	6.66168e+07	6.64074e+07	6.4329e+07	7.70465e+07	7.48794e+07	7.17634e+07	7.49311e+07	8.22354e+07	7.88839e+07	5.95609e+07	5.76226e+07	5.78718e+07	5.74327e+07	5.97038e+07	5.49097e+07	5.96662e+07	6.28186e+07	6.54636e+07	6.4646e+07	6.35372e+07	7.07648e+07	6.34764e+07	6.65272e+07	6.42657e+07	6.54504e+07
p-Coumaraldehyde	2.75	level2			147.045	159.1	NEG	8.86914e+07	8.03058e+07	3.81482e+07	8.45183e+07	4.56191e+07	6.99723e+07	8.24434e+07	8.42405e+07	8.69885e+07	7.90017e+07	7.61888e+07	6.77817e+07	1.35431e+08	8.41161e+07	1.25153e+08	1.32659e+08	1.15312e+08	1.17427e+08	7.42806e+07	8.5239e+07	9.13038e+07	9.20269e+07	8.70711e+07	7.38524e+07	3.82055e+07	3.76968e+07	3.84391e+07	8.57017e+07
N-acetylcytisine	2.75	level2			233.129	149.1	POS	1.13548e+07	9.63166e+06	6.34471e+06	7.51201e+06	5.64507e+06	1.92136e+07	1.05822e+07	8.81912e+06	1.53776e+07	8.15622e+06	8.19895e+06	6.99585e+06	3.77738e+07	3.64044e+07	4.42622e+07	1.02457e+08	3.52119e+07	4.13891e+07	1.21298e+07	1.52894e+07	1.33414e+07	1.45395e+07	1.69219e+07	9.31299e+06	1.74724e+07	1.85349e+07	1.87605e+07	1.79282e+07
Cytisin	2.75	level2			191.118	135.9	POS	4.73888e+07	3.58215e+07	3.38618e+07	3.13906e+07	3.92718e+07	3.70674e+07	4.58578e+07	3.81055e+07	5.46435e+07	4.20457e+07	4.5908e+07	4.06848e+07	5.76873e+07	6.71452e+07	5.96709e+07	6.34362e+07	5.45911e+07	6.65116e+07	4.58088e+07	5.07484e+07	4.75228e+07	6.06056e+07	4.69716e+07	4.41941e+07	4.77825e+07	4.94727e+07	4.90073e+07	4.86895e+07
Abrine	2.75	level2			219.113	54.9	POS	3.63837e+07	9.59723e+06	9.6461e+06	2.11536e+07	1.0176e+07	2.26633e+07	9.08915e+06	1.037e+07	2.90772e+07	9.0371e+06	8.13484e+06	2.6555e+07	2.53161e+07	5.80768e+07	1.7174e+07	1.51088e+07	5.23309e+07	1.33905e+07	1.34063e+07	1.23902e+07	4.90431e+07	1.66261e+07	1.50014e+07	3.81835e+07	1.30194e+07	1.11679e+07	9.64246e+06	1.10827e+07
4-Cholesten-3-one	2.74	level2			385.346	315.8	POS	7.35608e+06	7.85449e+06	2.29534e+07	1.97703e+07	5.62752e+06	2.55206e+07	1.21687e+07	1.0869e+07	1.48424e+07	5.3021e+06	5.64674e+06	9.02578e+06	8.30351e+06	1.23872e+07	1.66901e+07	7.87962e+06	7.56039e+06	2.41343e+07	5.23906e+06	5.77799e+06	8.68011e+06	6.58982e+06	6.49605e+06	1.203e+07	1.11123e+07	5.14642e+06	3.99643e+06	5.74588e+06
Camellenodiol	2.74	level2			443.352	282.8	POS	1.02768e+06	3.79378e+06	2.93116e+06	8.40821e+06	2.22601e+06	712745	3.23166e+06	3.92581e+06	4.25098e+06	3.63373e+06	3.16124e+06	3.87094e+06	1.10983e+06	2.865e+06	2.68065e+06	1.6554e+06	2.60222e+06	1.81075e+06	984214	2.89138e+06	3.15993e+06	1.51234e+06	1.98112e+06	2.82973e+06	3.09468e+06	3.06236e+06	3.3376e+06	1.42178e+06
Phthalic anhydride	2.74	level2			149.023	274.6	POS	7.75142e+07	6.6183e+07	6.45347e+07	7.61553e+07	7.77877e+07	7.62726e+07	1.08053e+08	9.39165e+07	1.00466e+08	1.0463e+08	9.4368e+07	9.13342e+07	7.01577e+07	7.96039e+07	7.11749e+07	6.99829e+07	8.64289e+07	5.33213e+07	8.80738e+07	5.68461e+07	6.02781e+07	5.92103e+07	6.89691e+07	7.26082e+07	7.47729e+07	8.03917e+07	8.21125e+07	8.06183e+07
Petroselinic_acid	2.74	level2			281.248	263	NEG	2.90152e+06	2.97996e+06	3.72374e+06	4.05774e+06	5.4337e+06	3.31497e+06	3.76944e+06	3.36839e+06	1.40267e+06	2.89121e+06	3.27869e+06	2.33934e+06	1.13958e+06	4.33215e+06	2.70274e+06	3.3603e+06	3.71358e+06	4.43184e+06	4.13488e+06	1.26165e+06	1.93716e+06	1.33033e+06	4.41353e+06	3.87478e+06	5.64098e+06	3.57122e+06	3.43511e+06	3.32348e+06
Kaur-16-en-18-ol	2.74	level2			289.253	258.5	POS	2.92671e+07	2.86784e+07	3.28444e+07	2.92329e+07	3.08373e+07	3.07109e+07	3.12361e+07	3.42815e+07	3.45272e+07	2.63243e+07	3.15368e+07	3.28324e+07	3.0707e+07	2.7237e+07	2.67211e+07	2.89634e+07	2.45927e+07	2.50576e+07	2.84517e+07	3.53381e+07	3.69886e+07	3.08758e+07	2.98021e+07	3.43391e+07	2.85413e+07	2.81559e+07	3.18307e+07	3.02946e+07
Methylgingerol	2.74	level2			307.192	235.3	NEG	1.42002e+08	1.25468e+08	1.08887e+08	1.2048e+08	1.60579e+08	1.51948e+08	1.37546e+08	1.37883e+08	1.2995e+08	1.40639e+08	1.3237e+08	1.2424e+08	8.97792e+07	9.34063e+07	1.083e+08	1.11596e+08	9.4246e+07	9.16281e+07	9.85652e+07	1.06505e+08	1.00158e+08	7.97709e+07	1.05145e+08	9.92962e+07	1.20539e+08	1.16192e+08	1.34569e+08	1.18252e+08
Ascaridole	2.74	level2			169.122	235	POS	2.02268e+06	3.17397e+06	1.44456e+06	1.22324e+06	3.20258e+06	6.43838e+06	3.17788e+06	2.7434e+06	3.98499e+06	4.97917e+06	3.74009e+06	2.50885e+06	2.10898e+06	2.39125e+06	1.93015e+06	3.39115e+06	2.99596e+06	4.18679e+06	1.87488e+06	4.54509e+06	3.69452e+06	3.14636e+06	3.9916e+06	1.91911e+06	3.49171e+06	3.06629e+06	3.0412e+06	3.04663e+06
exo-5,6-Dimethylbicyclo[2.2.1]hept-5-en-2-ol	2.74	level2			139.112	230.3	POS	4.53863e+07	1.31536e+07	6.42221e+07	2.17416e+07	1.54238e+07	2.88829e+07	1.74298e+07	1.9484e+07	6.68027e+07	1.77263e+07	8.03136e+07	1.7347e+07	2.44753e+07	1.11017e+07	2.33491e+07	5.04745e+07	1.10214e+07	5.41256e+07	1.25509e+07	1.33807e+07	1.35317e+07	1.3468e+07	4.26348e+07	1.29159e+07	1.48873e+07	1.21283e+07	1.40639e+07	1.18348e+07
(10E,15Z)-9,12,13-trihydroxyoctadeca-10,15-dienoic acid	2.74	level2			327.218	226	NEG	3.42893e+08	3.35717e+08	2.94842e+08	3.26534e+08	3.93943e+08	3.378e+08	3.32649e+08	3.53144e+08	3.18129e+08	3.8277e+08	3.52276e+08	3.1127e+08	2.9563e+08	2.48713e+08	2.75127e+08	2.79947e+08	3.15246e+08	2.54341e+08	2.43577e+08	2.58733e+08	2.50394e+08	2.56568e+08	2.82562e+08	3.23265e+08	3.11885e+08	3.04811e+08	3.08792e+08	3.13887e+08
(R)-3-Methylcyclohexanone	2.74	level2			113.096	221	POS	1.04974e+07	9.51193e+06	9.84908e+06	1.0048e+07	8.86363e+06	1.14299e+07	1.27202e+07	1.20416e+07	1.13297e+07	9.93283e+06	1.28177e+07	1.27256e+07	9.27417e+06	9.25852e+06	9.96189e+06	8.96658e+06	8.11854e+06	8.1659e+06	1.01956e+07	1.11461e+07	1.2152e+07	1.09972e+07	8.04071e+06	1.15074e+07	1.09246e+07	1.07845e+07	1.0417e+07	8.68036e+06
4-Phenylpyridine	2.74	level2			156.081	213.8	POS	6.73445e+07	7.97452e+07	6.75846e+07	7.91375e+07	8.16108e+07	6.51568e+07	6.49397e+07	6.70025e+07	6.50006e+07	5.35258e+07	5.66205e+07	5.77936e+07	6.81259e+07	6.43992e+07	6.56093e+07	8.26769e+07	6.02637e+07	7.189e+07	4.95525e+07	6.04244e+07	6.24141e+07	6.02021e+07	5.8775e+07	5.37538e+07	6.47758e+07	6.62115e+07	6.62622e+07	6.59582e+07
N-Methoxy-1-vinyl-beta-carboline	2.74	level2			225.102	201.9	POS	6.69828e+06	7.63286e+06	6.82245e+06	7.45292e+06	8.58185e+06	6.51448e+06	7.1301e+06	7.63253e+06	6.30633e+06	7.21988e+06	6.15204e+06	7.12211e+06	5.78157e+06	5.78391e+06	5.23638e+06	5.68686e+06	6.39862e+06	5.84414e+06	5.62257e+06	7.21793e+06	6.01891e+06	7.03795e+06	5.49832e+06	6.90107e+06	5.52961e+06	6.86925e+06	5.89865e+06	6.31128e+06
Luteolin	2.74	level2			287.055	189.3	POS	1.3863e+07	1.3373e+07	7.30524e+06	9.13487e+06	1.28983e+07	1.69536e+07	1.70492e+07	1.12393e+07	2.1834e+07	1.54681e+07	1.10318e+07	1.18005e+07	3.96018e+07	3.90201e+07	4.03266e+07	3.19847e+07	3.72115e+07	2.76756e+07	1.40586e+07	1.45664e+07	1.07524e+07	1.2473e+07	1.71764e+07	1.66742e+07	1.87939e+07	1.94645e+07	1.95556e+07	2.00551e+07
Delphinidin	2.74	level2			303.05	182.6	POS	2.80656e+07	2.29125e+07	1.76457e+07	1.62238e+07	2.9511e+07	3.311e+07	2.78999e+07	1.60369e+07	2.60884e+07	1.86367e+07	1.77973e+07	2.09041e+07	3.95051e+07	3.96686e+07	4.16661e+07	3.05747e+07	3.47785e+07	2.895e+07	2.21631e+07	2.45137e+07	1.74105e+07	1.55813e+07	1.94702e+07	1.83258e+07	2.35352e+07	2.55113e+07	2.67455e+07	2.59839e+07
6-Methoxy-7-hydroxycoumarin	2.74	level2			193.049	176.8	POS	8.89423e+06	7.49441e+06	4.61859e+06	9.19838e+06	1.01698e+07	8.72467e+06	1.5611e+07	1.8092e+07	1.66533e+07	1.405e+07	1.54927e+07	8.11548e+06	1.1061e+07	1.35922e+07	1.53159e+07	1.32087e+07	1.32993e+07	1.76572e+07	1.11407e+07	1.01234e+07	1.23529e+07	9.99059e+06	1.1772e+07	1.30937e+07	1.32988e+07	1.33491e+07	1.1755e+07	1.11433e+07
4-HYDROXYCYCLOHEXANECARBOXYLIC ACID	2.74	level2			143.071	160.4	NEG	1.27712e+07	1.1362e+07	1.26655e+07	1.13367e+07	1.24365e+07	1.25866e+07	1.60256e+07	1.5391e+07	1.42488e+07	1.47088e+07	1.47118e+07	1.53736e+07	1.28441e+07	1.52821e+07	1.41153e+07	1.19371e+07	1.17519e+07	1.20203e+07	1.3794e+07	1.42194e+07	1.55484e+07	1.27034e+07	1.3273e+07	1.28989e+07	1.24427e+07	1.24801e+07	1.39244e+07	1.64774e+07
Esculetin	2.74	level2			177.019	160	NEG	1.29098e+07	1.44364e+07	1.5871e+07	1.30228e+07	1.26033e+07	1.50856e+07	1.51311e+07	1.29993e+07	1.5936e+07	1.36592e+07	1.37636e+07	1.25054e+07	2.09686e+07	1.21173e+07	1.50267e+07	9.82166e+06	1.01086e+07	1.0883e+07	1.27926e+07	1.54196e+07	1.51842e+07	1.25382e+07	1.44104e+07	1.27672e+07	1.22388e+07	1.3036e+07	1.35512e+07	1.40488e+07
Reserpine	2.74	level2			609.28	150.4	POS	4.27495e+06	4.69469e+06	3.35344e+06	3.26353e+06	3.52745e+06	2.74148e+06	4.92534e+06	4.78709e+06	9.03781e+06	2.84299e+06	4.87698e+06	2.41168e+06	557883	686615	1.30004e+06	1.69099e+06	522318	534516	982407	1.73899e+06	1.13629e+06	1.49251e+06	1.76564e+06	2.19792e+06	3.73963e+06	2.35056e+06	2.4107e+06	2.50377e+06
4-Hydroxyquinoline	2.74	level2			146.06	144.4	POS	5.8009e+07	5.35427e+07	5.16815e+07	5.34902e+07	5.26478e+07	5.31453e+07	5.373e+07	6.03103e+07	6.04931e+07	5.60038e+07	5.05772e+07	5.52753e+07	6.31329e+07	9.16508e+07	7.36012e+07	7.36996e+07	6.13633e+07	6.77111e+07	6.39154e+07	7.49347e+07	7.13329e+07	7.5159e+07	7.81971e+07	6.50987e+07	6.34622e+07	7.03716e+07	6.44221e+07	6.46861e+07
1-Naphthylamine	2.74	level2			144.081	37.4	POS	7.3734e+08	7.18106e+08	5.9627e+08	8.04393e+08	7.73991e+08	7.53887e+08	6.16343e+08	6.61513e+08	7.08201e+08	5.95928e+08	5.43477e+08	5.02143e+08	7.76724e+08	6.2073e+08	7.86657e+08	7.70918e+08	6.57752e+08	6.73778e+08	7.77002e+08	7.77543e+08	8.31643e+08	9.27993e+08	7.81772e+08	7.76255e+08	7.78475e+08	7.34913e+08	7.44554e+08	7.03168e+08
3-AMINOISOBUTANOIC ACID	2.74	level2			102.056	29.2	NEG	8.899e+06	2.7157e+07	6.3095e+06	5.51895e+06	9.07809e+06	9.89768e+06	7.57549e+06	7.62926e+06	1.99919e+07	8.39844e+06	8.39694e+06	2.08226e+07	2.53769e+07	2.67842e+07	3.56241e+07	8.81421e+06	8.64387e+06	6.61386e+06	8.69316e+06	8.48648e+06	2.8143e+07	7.5499e+06	9.49903e+06	8.48997e+06	3.01807e+07	1.10671e+07	2.42393e+07	2.16712e+07
8-(2,3-dihydroxy-3-methylbutyl)-7-methoxychromen-2-one [IIN-based	2.74	level2			261.112	9.1	POS	2.00222e+06	1.67271e+06	1.76856e+06	4.04579e+06	2.13306e+06	1.84829e+06	1.94186e+06	2.05866e+06	3.32414e+06	1.68979e+06	1.94534e+06	2.82295e+06	1.54705e+06	1.54093e+06	299525	1.93347e+06	2.89641e+06	2.58251e+06	1.95199e+06	1.62318e+06	2.58948e+06	1.89371e+06	2.18982e+06	2.04604e+06	2.06355e+06	2.04085e+06	1.4777e+06	1.50703e+06
Olivetol	2.74	level2			179.108	249.7	NEG	4.97504e+06	5.19627e+06	7.65949e+06	4.61708e+06	4.80843e+06	5.14823e+06	6.02397e+06	7.19437e+06	6.46356e+06	6.42515e+06	5.68108e+06	6.04937e+06	6.0747e+06	4.86496e+06	4.81461e+06	5.13264e+06	4.47627e+06	4.06388e+06	4.6129e+06	5.97795e+06	6.05201e+06	5.30739e+06	5.03295e+06	5.36405e+06	5.0267e+06	5.87377e+06	5.83874e+06	5.59291e+06
Darutigenol	2.74	level2			345.24	244.7	POS	3.47405e+07	3.24988e+07	3.53706e+07	3.27517e+07	3.58168e+07	3.57395e+07	4.18341e+07	4.38891e+07	3.26619e+07	4.24018e+07	4.07938e+07	4.0419e+07	2.7113e+07	2.3889e+07	2.97046e+07	2.40973e+07	2.51462e+07	2.26266e+07	2.30871e+07	2.59147e+07	2.45545e+07	2.75002e+07	3.08654e+07	3.05071e+07	3.16298e+07	3.31668e+07	3.43463e+07	3.30083e+07
FA 18:1+2O	2.74	level2			313.238	243.9	NEG	1.90042e+07	2.13956e+07	2.00175e+07	2.16467e+07	1.79447e+07	2.55433e+07	3.16144e+07	2.42903e+07	2.54866e+07	2.06274e+07	3.06022e+07	2.76612e+07	2.94788e+07	3.04124e+07	2.6781e+07	2.96378e+07	2.55071e+07	2.92851e+07	4.2754e+07	5.50172e+07	5.84252e+07	4.1707e+07	4.02494e+07	3.8805e+07	3.02181e+07	3.06271e+07	3.18966e+07	3.15245e+07
Chrysanthemic_acid	2.74	level2			167.108	239.8	NEG	1.39235e+07	1.32158e+07	1.31016e+07	1.35787e+07	1.25873e+07	1.4899e+07	1.48114e+07	1.2629e+07	1.56394e+07	1.21112e+07	1.40677e+07	1.22062e+07	1.16432e+07	1.14576e+07	1.15684e+07	1.23323e+07	1.08942e+07	1.14874e+07	1.28442e+07	1.43609e+07	1.50463e+07	1.39355e+07	1.282e+07	1.21708e+07	1.29079e+07	1.34908e+07	1.28987e+07	1.39005e+07
(2E,6E,10Z)-12-hydroxy-10-(hydroxymethyl)-6-methyl-2-(4-methylpent-3-enyl)dodeca-2,6,10-trienoic acid	2.74	level2			359.219	234.2	POS	2.86596e+07	2.73277e+07	3.11232e+07	2.27302e+07	2.42959e+07	3.02676e+07	3.80465e+07	3.83045e+07	3.44467e+07	3.11099e+07	3.88092e+07	3.64331e+07	2.28666e+07	1.78071e+07	1.54682e+07	2.00112e+07	2.09687e+07	1.62559e+07	1.88245e+07	1.9647e+07	2.13542e+07	2.34153e+07	2.38839e+07	2.47122e+07	2.42274e+07	2.55644e+07	2.58834e+07	2.64749e+07
beta-Obscurine	2.74	level2			273.196	225	POS	3.55256e+07	3.98588e+07	3.80655e+07	3.76964e+07	3.30474e+07	3.31117e+07	5.5397e+07	5.37813e+07	8.28608e+07	6.65338e+07	6.24008e+07	4.59107e+07	4.2201e+07	4.94087e+07	5.79889e+07	3.89223e+07	6.18948e+07	3.93125e+07	3.0111e+07	3.75797e+07	3.67767e+07	2.52229e+07	4.38881e+07	6.40387e+07	6.98042e+07	4.66015e+07	5.16822e+07	4.6441e+07
Hispidulin	2.74	level2			299.057	223.4	NEG	1.30318e+07	1.31764e+07	1.63575e+07	1.62403e+07	1.46276e+07	1.67383e+07	4.21688e+07	1.60345e+07	3.27585e+07	4.52222e+07	6.36824e+07	2.0001e+07	1.10137e+07	1.0779e+07	1.10754e+07	1.00552e+07	1.03667e+07	9.7506e+06	9.84654e+06	1.28706e+07	1.13386e+07	8.15594e+06	1.14354e+07	9.42796e+06	1.74292e+07	1.85457e+07	1.9022e+07	1.89731e+07
Sophocarpine	2.74	level2			247.18	205.3	POS	1.01544e+09	1.20095e+09	6.89946e+08	1.09931e+09	6.99812e+08	1.0271e+09	1.61271e+09	1.62109e+09	1.74037e+09	2.12029e+09	1.56755e+09	1.59357e+09	3.57666e+09	4.61204e+09	4.41315e+09	3.50944e+09	6.24607e+09	3.67565e+09	1.37678e+09	2.05933e+09	1.48329e+09	1.23614e+09	2.23334e+09	1.33937e+09	2.19248e+09	2.19817e+09	2.18317e+09	2.18239e+09
Camptothecin	2.74	level2			349.119	199.9	POS	2.74608e+07	3.66468e+07	3.46336e+07	3.81582e+07	5.06687e+07	2.614e+07	1.43391e+07	2.89139e+07	1.11697e+07	2.77334e+07	2.08124e+07	1.87292e+07	2.22761e+07	2.20712e+07	1.95813e+07	3.5814e+07	2.6067e+07	3.82999e+07	3.34781e+07	3.74078e+07	3.08998e+07	3.26738e+07	1.66229e+07	4.67299e+07	2.90286e+07	2.87111e+07	2.97359e+07	2.93818e+07
Echimidine N-oxide	2.74	level2			414.212	193.3	POS	6.06909e+06	5.7462e+06	5.16898e+06	5.42162e+06	5.81931e+06	5.87836e+06	4.43445e+06	4.44929e+06	5.01268e+06	4.7025e+06	4.78691e+06	3.55893e+06	3.81893e+06	3.57311e+06	4.16328e+06	4.44397e+06	3.51033e+06	3.43185e+06	4.17641e+06	5.28343e+06	4.20686e+06	4.55819e+06	4.47359e+06	4.47975e+06	4.339e+06	4.37077e+06	4.23432e+06	5.02179e+06
2-Hydroxyquinoline	2.74	level2			146.06	192	POS	2.22979e+07	2.185e+07	2.17318e+07	2.11964e+07	2.40021e+07	2.01646e+07	2.26341e+07	2.90374e+07	2.16124e+07	3.00835e+07	2.16337e+07	3.01197e+07	2.53582e+07	2.50891e+07	2.50486e+07	2.53832e+07	3.02047e+07	2.62488e+07	1.95532e+07	1.97632e+07	2.30686e+07	2.5553e+07	1.92118e+07	2.50046e+07	2.26676e+07	2.43436e+07	2.38983e+07	2.50775e+07
luteolin 4'-O-glucoside	2.74	level2			449.107	189.4	POS	3.77e+06	2.74897e+06	1.68869e+06	1.83414e+06	3.00105e+06	3.78755e+06	4.03741e+06	2.20024e+06	4.92262e+06	3.27182e+06	2.72962e+06	2.28744e+06	8.4039e+06	8.62179e+06	9.20398e+06	6.9964e+06	7.72367e+06	5.56986e+06	2.78085e+06	3.63828e+06	2.46828e+06	2.67945e+06	3.61175e+06	3.65141e+06	4.20336e+06	4.19032e+06	4.19283e+06	4.55089e+06
Vasicinol	2.74	level2			205.097	161	POS	5.54497e+07	4.6825e+07	4.67392e+07	4.38644e+07	4.62645e+07	6.00206e+07	8.77806e+07	5.95612e+07	6.77792e+07	6.51108e+07	7.14604e+07	7.32062e+07	5.12811e+07	5.78213e+07	5.83405e+07	4.83289e+07	5.13927e+07	4.78257e+07	5.05159e+07	6.68713e+07	7.76266e+07	6.24915e+07	5.80718e+07	5.05915e+07	5.96839e+07	6.13257e+07	6.32696e+07	6.27094e+07
Withasomnine	2.74	level2			185.107	149.1	POS	1.88337e+07	2.35264e+07	1.17431e+07	2.00776e+07	1.8833e+07	2.15293e+07	6.14444e+06	1.45717e+07	1.13926e+07	1.23797e+07	5.3379e+06	6.37379e+06	2.77632e+07	2.42341e+07	3.3973e+07	4.56538e+07	3.09908e+07	3.6633e+07	1.36907e+07	1.4896e+07	9.21077e+06	8.15444e+06	7.91906e+06	1.10832e+07	1.95623e+07	1.91423e+07	1.90462e+07	1.67737e+07
N-Methyl-2-pyrrolidone	2.74	level2			100.076	141.8	POS	6.84326e+07	6.63474e+07	6.71586e+07	6.45402e+07	6.38605e+07	7.35693e+07	8.97507e+07	8.93439e+07	9.10438e+07	8.58497e+07	8.88975e+07	8.85912e+07	7.73339e+07	7.54831e+07	7.50521e+07	7.5159e+07	7.84473e+07	7.73894e+07	9.59114e+07	1.01954e+08	1.4487e+08	1.02652e+08	9.21723e+07	9.27946e+07	8.16021e+07	8.34289e+07	8.46498e+07	8.49064e+07
2,6-Dimethoxy-4-[(1E)-3-oxo-1-propen-1-yl]phenyl beta-D-glucopyranoside	2.74	level2			393.116	63.6	POS	232415	127462	560727	99755.7	342096	462520	623196	137910	510164	197907	341736	390112	116091	179233	0	422942	0	0	319739	1.0388e+06	1.63713e+06	813843	199394	1.04312e+06	746274	88039.4	122463	1.18043e+06
Castanospermine	2.74	level2			188.093	41.3	NEG	1.45453e+07	1.02191e+07	9.81749e+06	1.09211e+07	1.13645e+07	1.31158e+07	1.98073e+07	1.37236e+07	2.05918e+07	1.22248e+07	1.3659e+07	1.47063e+07	4.9467e+06	8.73973e+06	8.32521e+06	1.23604e+07	6.74136e+06	5.90344e+06	9.52541e+06	1.05596e+07	1.28262e+07	1.35987e+07	1.06046e+07	1.19167e+07	1.14041e+07	1.14773e+07	1.16394e+07	1.20642e+07
Abietic acid	2.74	level2			301.217	3.9	NEG	1.11147e+06	0	0	1.50074e+06	2.8332e+06	0	0	964173	0	0	1.21031e+06	0	621520	705731	1.44528e+06	888110	0	1.09088e+06	1.01947e+06	731484	1.46628e+06	0	1.42807e+06	0	1.47727e+06	2.13603e+06	855105	0
Pinolenic_Acid	2.74	level2			277.217	3.6	NEG	3.59433e+06	2.55422e+06	2.64276e+06	2.56099e+06	4.62881e+06	2.62721e+06	3.16922e+06	2.94089e+06	3.34396e+06	978005	1.67263e+06	2.9855e+06	2.50387e+06	3.96075e+06	3.57219e+06	3.25054e+06	3.03563e+06	4.20895e+06	4.57635e+06	3.21941e+06	3.89415e+06	3.48014e+06	3.40602e+06	3.07897e+06	5.22045e+06	1.89436e+06	1.3233e+06	1.12143e+06
4-Methyloctanoic acid	2.74	level2			157.124	354.8	NEG	954578	1.80109e+06	1.4963e+06	1.65002e+06	1.6095e+06	1.24026e+06	1.39366e+06	1.28462e+06	1.34325e+06	1.58476e+06	1.75565e+06	1.53719e+06	1.86074e+06	1.24114e+06	2.04772e+06	1.48588e+06	1.1288e+06	1.66325e+06	1.25136e+06	1.50041e+06	1.64256e+06	1.05579e+06	1.49126e+06	1.83107e+06	1.7549e+06	1.65047e+06	1.39259e+06	1.26351e+06
2-Methylvaleric acid	2.74	level2			115.076	285.3	NEG	7.20592e+07	9.51812e+07	8.0923e+07	9.4934e+07	8.28871e+07	8.86456e+07	9.71129e+07	1.04503e+08	1.00438e+08	9.50967e+07	9.98617e+07	9.24278e+07	5.81041e+07	9.09327e+07	6.64245e+07	6.30462e+07	5.56834e+07	6.21455e+07	5.63977e+07	7.44044e+07	8.04577e+07	6.66925e+07	7.90966e+07	9.60444e+07	8.51438e+07	8.11609e+07	8.11839e+07	8.534e+07
Embelin	2.74	level2			293.176	252.4	NEG	9.97138e+07	9.54922e+07	7.62984e+07	9.55417e+07	7.65271e+07	8.34496e+07	1.23759e+08	7.87662e+07	8.10317e+07	1.21309e+08	1.25905e+08	7.68704e+07	1.3635e+08	9.16438e+07	8.9223e+07	1.1857e+08	1.05987e+08	8.53975e+07	9.39349e+07	1.13908e+08	9.69828e+07	1.20078e+08	2.31061e+07	1.13455e+08	6.98073e+07	6.88517e+07	7.0972e+07	6.86366e+07
Pivagabine	2.74	level2			170.118	174.2	POS	9.67997e+06	7.03952e+06	5.53202e+07	1.00962e+07	1.01059e+07	1.57001e+07	7.32902e+06	5.95435e+06	7.06309e+06	6.94798e+06	7.46135e+06	4.20816e+06	6.54194e+07	9.81865e+06	1.05522e+07	1.1311e+07	1.02458e+07	7.98499e+06	7.77677e+06	2.1011e+07	2.3613e+07	7.28746e+06	7.62443e+06	7.41374e+06	1.31285e+07	1.26223e+07	1.34479e+07	1.28437e+07
N-[2-(1H-indol-3-yl)ethyl]acetamide	2.74	level2			201.103	173.7	NEG	5.36993e+07	5.27256e+07	6.14622e+07	5.56964e+07	5.55466e+07	4.51118e+07	2.95464e+07	4.00846e+07	3.18002e+07	4.03006e+07	3.71567e+07	2.66038e+07	7.97874e+07	6.55776e+07	6.8598e+07	7.57321e+07	6.21098e+07	7.19111e+07	4.47748e+07	5.76772e+07	4.31783e+07	4.59323e+07	4.37778e+07	3.66229e+07	5.06864e+07	5.33151e+07	5.21153e+07	4.83005e+07
Tolazoline (hydrochloride)	2.74	level2			161.107	140.4	POS	1.58418e+08	1.54291e+08	1.36103e+08	1.41604e+08	4.55263e+08	1.52382e+08	1.58659e+08	2.48126e+08	3.00373e+08	1.53121e+08	1.38831e+08	1.39034e+08	1.57361e+08	1.61588e+08	1.46987e+08	1.38116e+08	1.45064e+08	1.31832e+08	1.4239e+08	1.65361e+08	1.87098e+08	2.1013e+08	1.58322e+08	1.7885e+08	1.70282e+08	1.70648e+08	1.7991e+08	1.75556e+08
Edaravone	2.74	level2			175.087	65.7	POS	1.93636e+07	2.03359e+07	1.27252e+07	1.89958e+07	1.09955e+07	6.33305e+06	1.51937e+07	1.766e+07	1.65761e+07	1.88876e+07	6.4277e+06	1.45064e+07	4.15121e+07	4.57206e+07	2.86385e+07	5.30295e+07	3.98238e+07	4.70474e+07	1.19144e+07	1.57452e+07	7.90596e+06	9.16643e+06	2.09015e+07	2.28053e+07	1.98382e+07	2.17115e+07	2.12268e+07	2.3047e+07
17-ODYA	2.74	level2			279.233	14.8	NEG	4.27231e+06	3.01021e+06	3.51057e+06	6.99082e+06	4.66856e+06	3.09988e+06	3.78236e+06	3.6255e+06	3.72313e+06	1.74754e+06	2.08519e+06	3.47059e+06	2.43355e+06	3.73035e+06	4.5809e+06	3.56091e+06	3.4603e+06	4.82426e+06	4.65277e+06	3.31944e+06	5.17953e+06	3.75751e+06	4.29986e+06	2.99693e+06	5.26613e+06	2.22539e+06	1.85008e+06	1.55319e+06
(2E,6E,10E)-12-acetyloxy-6,10-dimethyl-2-(4-methylpent-3-enyl)dodeca-2,6,10-trienoic acid	2.74	level2			361.238	262.3	NEG	978572	1.01087e+06	1.23525e+06	745512	846923	1.07789e+06	764218	1.1734e+06	515848	772900	1.04535e+06	868787	1.05095e+06	998320	837296	1.4425e+06	873047	963328	1.04054e+06	839332	683382	954538	935174	715032	796011	885317	648028	815578
octadecyl hydrogen sulfate	2.74	level2			349.242	352.2	NEG	3.16208e+06	3.49202e+06	1.0679e+07	4.57125e+06	4.35033e+06	3.25276e+06	1.06814e+06	1.17904e+06	1.03786e+06	792473	1.05461e+06	1.14804e+06	1.03369e+06	917982	1.17126e+06	805962	1.07357e+06	802236	1.14638e+06	1.59445e+06	6.85084e+06	3.20425e+06	3.70422e+06	3.75121e+06	2.90594e+06	2.75437e+06	2.73844e+06	2.61584e+06
AlisolA24-acetate	2.74	level2			531.369	327	NEG	498727	1.45123e+06	169113	725109	449565	1.91834e+06	1.80964e+06	302520	1.39509e+06	397076	653162	1.92892e+06	324475	572927	1.02489e+06	189382	337255	557510	2.92566e+06	513093	839629	508906	1.08378e+06	443041	1.03696e+06	900838	1.02666e+06	1.36349e+06
(1S,4S,5R,9S,10R,13R,14R)-5-(acetoxymethyl)-9-methyl-14-(2-methylpropanoyloxymethyl)tetracyclo[11.2.1.01,10.04,9]hexadecane-5-carboxylic acid	2.74	level2			429.265	314.4	NEG	7.1071e+06	6.70099e+06	3.19312e+06	6.92624e+06	3.49747e+06	7.28149e+06	8.72956e+06	6.103e+06	1.25495e+07	7.55539e+06	3.78724e+06	4.21807e+06	7.19089e+06	1.71156e+07	2.63728e+07	1.16039e+07	8.62285e+06	1.26539e+07	1.81719e+07	1.7604e+07	1.78885e+07	2.18135e+07	1.65451e+07	9.84195e+06	9.59211e+06	1.08228e+07	1.82246e+07	1.19517e+07
(E)-5-hydroxyundec-2-enoic acid	2.74	level2			199.134	217.4	NEG	8.75765e+07	9.08136e+07	7.57569e+07	8.73485e+07	9.7816e+07	8.37388e+07	9.65239e+07	9.9607e+07	9.86113e+07	1.02741e+08	8.57018e+07	1.0318e+08	1.07986e+08	1.01027e+08	1.03659e+08	1.12771e+08	1.02238e+08	1.06355e+08	9.45715e+07	1.09398e+08	1.19065e+08	1.0922e+08	1.099e+08	9.77886e+07	1.02002e+08	9.82708e+07	1.02976e+08	1.0145e+08
(5S,9R)-14-(hydroxymethyl)-5,9-dimethyl-tetracyclo[11.2.1.01,10.04,9]hexadec-14-ene-5-carboxylic acid	2.74	level2			317.212	15.5	NEG	2.31045e+06	700206	662168	1.24394e+06	1.12458e+06	964761	926527	926573	783937	739243	995015	1.32259e+06	791417	683726	1.09164e+06	928296	670357	1.30854e+06	1.20991e+06	1.35995e+06	1.21227e+06	918973	1.27514e+06	747462	1.26103e+06	1.23216e+06	800364	587136
Cyclohexylamine	2.73	level2			100.112	359.2	POS	3.21066e+06	2.71356e+06	3.66581e+06	3.74906e+06	3.73569e+06	3.72923e+06	4.84362e+06	2.68568e+06	2.24156e+06	2.73401e+06	2.63848e+06	3.67961e+06	2.89114e+06	3.49107e+06	4.24854e+06	2.85532e+06	3.05742e+06	2.71942e+06	3.7008e+06	2.86122e+06	3.47499e+06	3.30105e+06	3.60989e+06	3.85083e+06	3.67339e+06	3.20186e+06	3.25401e+06	3.67074e+06
1-Aminocyclohexanecarboxylic_acid	2.73	level2			144.102	326.4	POS	993777	1.7896e+06	1.93822e+06	1.33515e+06	1.98317e+06	1.72888e+06	1.22719e+06	1.66593e+06	1.87256e+06	1.84425e+06	1.56297e+06	1.62267e+06	999554	1.71793e+06	1.81007e+06	850690	2.15238e+06	1.76357e+06	1.84465e+06	2.03713e+06	1.87968e+06	1.97048e+06	1.82694e+06	1.64016e+06	1.75163e+06	1.13863e+06	1.67939e+06	792410
PGA1	2.73	level2			337.237	308.6	POS	1.3952e+07	1.10581e+07	1.72753e+07	1.21021e+07	9.06468e+06	1.2766e+07	1.40039e+07	1.50969e+07	1.35646e+07	1.43991e+07	1.60592e+07	1.4358e+07	2.1185e+07	2.32809e+07	2.80996e+07	2.57989e+07	2.97309e+07	3.63094e+07	1.17682e+07	1.20918e+07	1.33174e+07	1.29854e+07	1.51883e+07	1.00408e+07	1.61498e+07	1.31756e+07	1.31047e+07	1.2531e+07
Sugiol	2.73	level2			301.216	307.8	POS	4.12554e+07	2.02768e+07	2.25082e+07	2.14324e+07	1.94008e+07	2.23901e+07	2.89099e+07	2.91571e+07	2.57618e+07	2.82051e+07	4.71489e+07	3.01323e+07	1.79226e+07	2.16106e+07	4.06403e+07	2.04809e+07	2.30919e+07	2.20701e+07	1.98138e+07	2.21245e+07	3.87238e+07	3.75395e+07	2.49025e+07	2.407e+07	2.28667e+07	2.47264e+07	2.35059e+07	2.37989e+07
Tricosanoic acid	2.73	level2			353.343	294.6	NEG	9.30286e+07	9.08395e+07	8.99134e+07	1.01995e+08	3.20308e+06	7.98878e+07	1.07193e+08	8.47275e+07	8.3927e+07	8.25265e+07	4.66244e+07	8.83893e+07	5.35307e+06	8.73832e+07	8.1694e+07	8.25283e+07	9.01177e+07	5.71154e+07	8.9622e+07	5.21937e+07	9.42088e+07	9.75126e+07	9.25809e+07	3.21533e+06	8.76071e+07	9.34485e+07	1.01298e+08	9.03037e+07
Dibenzyl_ether	2.73	level2			199.112	269.3	POS	1.42156e+07	8.91454e+06	1.06711e+07	8.46409e+06	8.84006e+06	1.39227e+07	2.06332e+07	1.68364e+07	1.70667e+07	1.50232e+07	1.93288e+07	2.04257e+07	8.27404e+06	7.78677e+06	1.31669e+07	5.02965e+06	4.51248e+06	3.97995e+06	5.205e+06	8.1455e+06	1.07251e+07	9.02126e+06	1.08926e+07	1.51332e+07	1.12924e+07	1.18532e+07	1.17992e+07	1.15234e+07
1-Heptadecene-4,6-diyne-3,9-diol	2.73	level2			263.2	254.5	POS	8.78512e+07	2.16406e+07	7.34903e+07	1.92176e+07	4.92454e+07	9.01951e+07	2.4465e+07	2.2656e+07	2.11277e+07	1.12481e+08	2.39927e+07	2.10577e+07	2.76712e+07	2.38098e+07	8.75724e+07	8.27878e+07	2.41765e+07	7.73132e+07	2.51678e+07	2.45761e+07	2.53333e+07	2.84552e+07	2.16889e+07	2.537e+07	2.22467e+07	2.55028e+07	9.42027e+07	2.39424e+07
9-HPODE	2.73	level2			311.223	254.2	NEG	7.28488e+07	7.01551e+07	7.4514e+07	6.75704e+07	7.45151e+07	7.92693e+07	7.39893e+07	6.75881e+07	7.25348e+07	7.13978e+07	7.12307e+07	7.57952e+07	8.71309e+07	8.24369e+07	9.16326e+07	8.06101e+07	8.5345e+07	7.63952e+07	8.07e+07	9.30156e+07	8.6682e+07	8.63525e+07	9.57991e+07	9.27706e+07	8.2402e+07	7.72627e+07	8.22773e+07	8.10987e+07
DIHYDROJASMONIC_ACID	2.73	level2			211.134	247	NEG	2.27938e+07	2.51525e+07	2.08212e+07	2.61029e+07	2.62937e+07	2.28105e+07	2.20492e+07	2.31935e+07	2.34496e+07	2.2871e+07	2.47573e+07	2.88194e+07	2.6368e+07	2.43307e+07	2.48462e+07	2.53201e+07	2.44614e+07	2.45088e+07	2.85884e+07	2.71619e+07	2.33134e+07	2.4857e+07	2.54273e+07	2.32246e+07	1.47801e+07	1.47415e+07	1.46046e+07	1.6091e+07
(x)-p-Menth-1-en-4-yl_5-isopropyl-2-methylphenyl_ether	2.73	level2			287.237	244.1	POS	8.43332e+08	7.47479e+08	7.9574e+08	7.54165e+08	8.45469e+08	8.80319e+08	1.01406e+09	1.06765e+09	8.57934e+08	9.78553e+08	1.08034e+09	1.00736e+09	7.14262e+08	6.17604e+08	7.53581e+08	6.48329e+08	6.32251e+08	6.33904e+08	5.81167e+08	6.78557e+08	6.58627e+08	6.40272e+08	7.56941e+08	7.38929e+08	7.76123e+08	7.93432e+08	8.10549e+08	8.62343e+08
[8]-Paradol	2.73	level2			307.227	221.8	POS	3.65928e+07	2.64917e+07	3.96284e+07	2.00581e+07	2.56467e+07	4.03217e+07	1.78613e+07	4.93757e+07	3.37676e+07	3.99336e+07	5.26697e+07	2.54437e+07	2.72721e+07	4.62644e+07	2.89854e+07	1.91747e+07	5.19756e+07	2.38532e+07	1.29173e+07	3.2056e+07	1.07798e+07	1.22542e+07	2.31842e+07	1.50025e+07	2.60386e+07	2.39663e+07	2.50837e+07	2.60015e+07
Pinoquercetin	2.73	level2			315.051	212.1	NEG	2.44654e+07	2.34267e+07	3.3405e+07	2.78377e+07	2.60493e+07	2.83832e+07	4.71799e+07	3.55676e+07	4.31737e+07	6.14134e+07	7.19614e+07	3.85282e+07	2.8109e+07	2.59211e+07	3.18058e+07	2.68135e+07	2.3966e+07	2.54123e+07	2.28704e+07	3.46508e+07	3.01889e+07	1.74671e+07	2.72305e+07	2.22609e+07	3.28854e+07	3.3259e+07	3.24328e+07	3.32522e+07
DICTAMNINE	2.73	level2			200.071	201.9	POS	5.12344e+07	5.9347e+07	6.24388e+07	5.94139e+07	4.85821e+07	4.74077e+07	3.81684e+07	6.55499e+07	4.03523e+07	5.12852e+07	4.49194e+07	3.89358e+07	5.09459e+07	4.5315e+07	4.65547e+07	5.71892e+07	4.09134e+07	5.61659e+07	5.3018e+07	5.2749e+07	3.87445e+07	4.97629e+07	4.16861e+07	4.95852e+07	5.01597e+07	4.99445e+07	5.07657e+07	5.14081e+07
Diphenylamine	2.73	level2			170.096	199.9	POS	1.5689e+07	1.84934e+07	1.6591e+07	1.90204e+07	1.85555e+07	1.57148e+07	1.65976e+07	1.7841e+07	1.77928e+07	1.59076e+07	1.39981e+07	1.48145e+07	2.20121e+07	2.04607e+07	2.20545e+07	2.88846e+07	1.84715e+07	2.47582e+07	1.28559e+07	1.52068e+07	1.54717e+07	1.5401e+07	1.46129e+07	1.38463e+07	1.78231e+07	1.79236e+07	1.85665e+07	1.82202e+07
(1xi,3xi)-1,2,3,4-Tetrahydro-1-methyl-beta-carboline-3-carboxylic_acid	2.73	level2			231.113	159	POS	2.36974e+07	2.68407e+07	2.55963e+07	2.58962e+07	2.51388e+07	2.56847e+07	1.78275e+07	3.00851e+07	1.96543e+07	2.65441e+07	2.06895e+07	2.07768e+07	1.34771e+08	1.35034e+08	1.42256e+08	1.45355e+08	1.28419e+08	1.47724e+08	4.673e+07	6.13523e+07	4.75738e+07	3.64055e+07	5.2944e+07	2.19447e+07	7.58112e+07	7.63648e+07	7.76732e+07	7.66458e+07
GAMMA-CAPROLACTONE	2.73	level2			115.075	132.5	POS	0	0	0	0	0	0	0	0	0	0	0	0	0	0	0	0	0	0	0	0	0	0	0	0	1.6066e+06	3.6087e+06	4.61873e+06	5.22444e+06
PICOLINIC ACID	2.73	level2			122.025	45.4	NEG	2.09794e+07	1.95621e+07	1.97567e+07	1.81491e+07	1.77355e+07	1.98688e+07	2.2788e+07	2.22978e+07	2.36093e+07	2.13086e+07	2.07076e+07	2.24787e+07	2.35936e+07	2.21006e+07	2.37728e+07	2.41961e+07	2.30929e+07	2.52527e+07	2.2295e+07	2.18054e+07	2.4746e+07	2.51695e+07	2.24739e+07	2.33895e+07	2.15083e+07	2.17467e+07	2.3254e+07	2.16981e+07
3-Methylpyridine	2.73	level2			94.065	35	POS	2.34668e+08	2.36194e+08	2.24774e+08	2.3681e+08	2.3949e+08	2.04402e+08	2.19902e+08	2.3449e+08	2.28863e+08	2.00272e+08	1.98738e+08	1.65947e+08	1.85803e+08	1.94824e+08	2.01584e+08	2.10607e+08	1.57311e+08	1.97338e+08	2.21498e+08	2.39439e+08	2.26803e+08	2.33712e+08	2.03038e+08	2.21764e+08	2.33928e+08	2.16401e+08	2.16703e+08	2.37888e+08
Eriodictyol-7-neohesperidoside	2.73	level2			595.168	26.9	NEG	3.4623e+06	3.18087e+06	3.25037e+06	3.08613e+06	2.64861e+06	2.56436e+06	3.89772e+06	2.88269e+06	4.72629e+06	2.82757e+06	3.7555e+06	2.30613e+06	413470	845148	792048	286542	628337	599418	385547	1.38841e+06	1.51753e+06	1.67077e+06	2.20149e+06	1.97418e+06	1.86709e+06	2.38062e+06	2.48186e+06	2.38834e+06
Isoamylamine	2.73	level2			88.112	2.3	POS	1.47998e+08	1.41967e+08	1.61008e+08	1.47344e+08	1.36441e+08	1.42316e+08	1.53052e+08	1.42665e+08	1.39874e+08	1.50025e+08	1.49054e+08	1.49554e+08	1.40177e+08	1.42442e+08	1.33435e+08	1.55632e+08	1.47403e+08	1.26566e+08	1.57602e+08	1.35331e+08	1.29012e+08	1.4179e+08	1.27769e+08	1.445e+08	1.43387e+08	1.34051e+08	1.53372e+08	1.46161e+08
Anhalamine	2.73	level2			210.112	45.1	POS	6.70498e+06	7.57165e+06	6.63141e+06	7.39941e+06	7.43075e+06	7.36038e+06	8.01281e+06	8.54389e+06	6.33311e+06	7.64513e+06	6.94221e+06	5.98038e+06	5.24192e+06	5.62603e+06	5.31438e+06	5.49768e+06	5.0362e+06	5.02893e+06	5.39878e+06	7.30752e+06	4.0186e+06	5.7015e+06	5.40562e+06	5.55486e+06	6.35618e+06	5.47366e+06	6.97197e+06	6.48182e+06
Caffeoyl putrescin (isomer of 390)	2.73	level2			249.124	41.8	NEG	2.57206e+07	2.60937e+07	1.76753e+07	2.59003e+07	2.78776e+07	2.73101e+07	2.02073e+07	1.93908e+07	2.54478e+07	1.90328e+07	1.45766e+07	1.96235e+07	2.21074e+07	2.07271e+07	2.39166e+07	2.35815e+07	1.97351e+07	2.15189e+07	2.7141e+07	2.14135e+07	2.57466e+07	2.96772e+07	2.48471e+07	2.64306e+07	2.34725e+07	2.18788e+07	2.353e+07	2.45289e+07
16,17-Dihydroxykauran-18-oic acid	2.73	level2			335.223	359.5	NEG	1.12092e+06	852809	912056	815052	1.29431e+06	1.25546e+06	1.57933e+06	1.21916e+06	1.23042e+06	985597	925801	946441	687856	858447	1.82885e+06	595811	700720	1.49587e+06	641462	578093	807673	668211	1.28972e+06	718516	737746	1.13076e+06	225446	769589
Tormentic acid	2.73	level2			489.349	313.1	POS	2.33862e+06	4.89665e+06	3.47577e+06	4.50881e+06	4.71655e+06	2.91362e+06	1.88449e+06	3.27032e+06	2.5207e+06	2.98765e+06	1.65635e+06	1.39162e+06	2.45746e+06	1.13081e+06	2.24228e+06	4.74647e+06	5.67475e+06	5.9622e+06	2.49537e+06	2.89104e+06	1.69601e+06	2.77181e+06	1.97791e+06	2.7478e+06	3.50468e+06	2.64749e+06	3.84817e+06	3.50247e+06
beta-Hydroxymyristic_acid	2.73	level2			243.196	293.9	NEG	2.54303e+08	2.82784e+08	2.78912e+08	3.68664e+08	2.73537e+08	3.62094e+08	2.13057e+08	2.66204e+08	2.82086e+08	4.2022e+08	1.58953e+08	2.90635e+08	5.33914e+08	3.93101e+08	4.3526e+08	4.23589e+08	5.75623e+08	3.9435e+08	3.50613e+08	3.46058e+08	4.46336e+08	4.3758e+08	3.24458e+08	4.0162e+08	3.32897e+08	3.15125e+08	3.21295e+08	3.20791e+08
KIRENOL	2.73	level2			337.239	275.5	NEG	1.6642e+08	1.15007e+08	1.10314e+08	1.08345e+08	1.14966e+08	1.379e+08	1.75251e+08	1.67129e+08	1.32645e+08	1.56795e+08	1.70288e+08	1.66529e+08	1.25699e+08	1.21257e+08	1.80204e+08	1.22128e+08	1.16986e+08	1.21486e+08	1.14866e+08	1.30637e+08	1.24115e+08	1.14372e+08	1.23611e+08	1.22603e+08	1.87018e+08	1.3669e+08	1.28147e+08	1.38887e+08
Lappaconitine	2.73	level2			583.303	257.7	NEG	5.59172e+06	5.71463e+06	5.19834e+06	5.41379e+06	5.81422e+06	4.56023e+06	4.42525e+06	5.76409e+06	4.69881e+06	6.62974e+06	4.76856e+06	4.1224e+06	7.03356e+06	6.52807e+06	7.28509e+06	6.72554e+06	6.39091e+06	6.0287e+06	4.3955e+06	5.29182e+06	1.12207e+07	1.27216e+07	4.89006e+06	4.12507e+06	5.20009e+06	5.25274e+06	5.40024e+06	5.67846e+06
afzelechin	2.73	level2			273.077	253.7	NEG	3.49341e+06	3.00621e+06	3.12918e+06	4.26816e+06	4.00203e+06	3.09397e+06	3.527e+06	3.76664e+06	3.3687e+06	3.64114e+06	3.59654e+06	3.19554e+06	3.41348e+06	3.27183e+06	3.93234e+06	3.43963e+06	3.31054e+06	3.95681e+06	3.83649e+06	2.98801e+06	3.88095e+06	3.53897e+06	4.02648e+06	3.56674e+06	4.08668e+06	4.10287e+06	3.71677e+06	3.21696e+06
Sauroxine	2.73	level2			275.211	239.8	POS	6.45766e+09	7.28726e+09	4.73869e+09	7.01307e+09	5.43299e+09	6.50402e+09	1.21873e+10	1.29224e+10	1.35651e+10	1.5186e+10	1.18501e+10	1.12793e+10	1.30275e+10	1.88792e+10	1.64326e+10	1.17149e+10	1.85146e+10	1.14529e+10	7.53607e+09	9.22292e+09	9.44397e+09	6.71473e+09	1.17093e+10	1.03891e+10	1.10826e+10	1.10398e+10	1.10241e+10	1.11989e+10
GRAYANOTOXIN_I	2.73	level2			411.239	228.6	NEG	2.99455e+07	3.38819e+07	2.82804e+07	2.28066e+07	2.55493e+07	3.89425e+07	4.48823e+07	3.96312e+07	1.25619e+07	3.75222e+07	3.1191e+07	3.9761e+07	3.63471e+07	3.14856e+07	3.76342e+07	4.039e+07	4.24972e+07	2.83483e+07	3.37489e+07	2.24926e+07	2.05801e+07	2.15704e+07	4.02661e+07	2.54393e+07	3.54648e+07	3.29265e+07	3.65779e+07	3.65163e+07
COLFORSIN	2.73	level2			409.224	224.7	NEG	1.52887e+07	1.07297e+07	1.18361e+07	1.17824e+07	1.20902e+07	1.68768e+07	1.99715e+07	1.80275e+07	1.64768e+07	1.51346e+07	1.82543e+07	1.70096e+07	8.48631e+06	8.69075e+06	1.28287e+07	8.60447e+06	8.60211e+06	6.75592e+06	8.95862e+06	1.1683e+07	1.28076e+07	1.40638e+07	1.37223e+07	1.32079e+07	1.29315e+07	1.25218e+07	1.71681e+07	1.26563e+07
Feruloyl O-methyldopamine	2.73	level2			344.15	196	POS	1.1353e+07	1.2709e+07	2.17202e+07	1.51458e+07	1.8778e+07	1.13527e+07	1.48257e+07	1.17446e+07	2.57479e+07	1.32198e+07	1.30931e+07	1.51909e+07	9.09562e+06	2.02045e+07	3.28128e+07	7.43268e+06	1.04336e+07	8.38103e+06	7.84007e+06	1.07844e+07	8.311e+06	5.3008e+06	7.56962e+06	7.55247e+06	1.41324e+07	1.3454e+07	1.35138e+07	1.33311e+07
3-Heptanone, 7-(3,4-dihydroxyphenyl)-5-hydroxy-1-(4-hydroxyphenyl)-	2.73	level2			329.14	190.2	NEG	3.25162e+07	2.80159e+07	3.94614e+07	3.32777e+07	3.53747e+07	2.89334e+07	4.50621e+07	3.61722e+07	4.68324e+07	3.05101e+07	4.03453e+07	3.17849e+07	1.51495e+07	1.71002e+07	2.2331e+07	1.63901e+07	1.63885e+07	1.6619e+07	1.64652e+07	2.04888e+07	1.35968e+07	1.4123e+07	1.66367e+07	1.43597e+07	2.6326e+07	2.64637e+07	2.64536e+07	2.71323e+07
Yangambin	2.73	level2			469.181	150.4	POS	1.51059e+06	1.82138e+06	2.18977e+06	1.69863e+06	1.81877e+06	1.97126e+06	1.62669e+06	2.37089e+06	1.65472e+06	1.99967e+06	1.93167e+06	1.83724e+06	1.13874e+06	1.42454e+06	1.12412e+06	1.50387e+06	1.11023e+06	800663	1.62288e+06	1.84044e+06	1.58533e+06	1.70795e+06	1.33881e+06	1.3011e+06	1.76377e+06	1.5645e+06	1.60016e+06	1.85396e+06
3,5-Dimethoxyallylbenzene	2.73	level2			179.107	176.9	POS	6.09378e+07	5.34199e+07	7.42079e+07	7.10654e+07	5.49717e+07	7.12199e+07	6.41093e+07	6.50828e+07	7.02478e+07	8.93153e+07	7.61173e+07	6.21262e+07	4.2232e+07	3.52569e+07	3.26762e+07	3.5033e+07	3.02018e+07	3.74454e+07	4.40372e+07	4.37436e+07	4.27132e+07	4.48001e+07	4.43256e+07	7.77591e+07	4.96003e+07	5.03067e+07	5.17796e+07	3.03322e+07
Ammothamnine	2.73	level2			265.191	176.2	POS	2.92514e+07	3.08593e+07	1.37087e+07	2.94289e+07	1.53274e+07	2.31901e+07	5.50693e+07	4.99081e+07	5.15963e+07	5.82017e+07	4.61863e+07	4.30864e+07	1.40914e+08	2.23099e+08	2.34906e+08	1.51559e+08	2.45996e+08	1.78396e+08	4.56673e+07	7.93943e+07	6.2643e+07	4.22392e+07	1.24466e+08	5.78072e+07	8.61585e+07	8.73929e+07	9.02483e+07	8.61484e+07
Gomisin J	2.73	level2			389.199	163.6	POS	2.66537e+06	3.7524e+06	1.34915e+06	3.82323e+06	1.66989e+06	2.2908e+06	307145	2.08377e+06	520191	2.62947e+06	822078	481741	3.08686e+07	2.01367e+07	2.04218e+07	3.16672e+07	2.12843e+07	1.91828e+07	3.48636e+06	4.82243e+06	3.02431e+06	4.40768e+06	5.0274e+06	1.23007e+06	7.79372e+06	8.00196e+06	8.28647e+06	7.8848e+06
6-alpha-Hydroxygeniposide	2.73	level2			405.141	157.7	POS	1.38493e+06	4.98976e+06	2.3004e+06	3.60685e+06	3.86824e+06	483444	0	422119	53116.8	1.10934e+06	0	68215.3	1.52988e+07	7.83953e+06	7.95217e+06	1.61042e+07	1.20485e+07	1.1549e+07	1.22857e+06	2.15136e+06	869645	747176	1.1125e+06	2.04076e+06	3.70424e+06	3.95075e+06	4.33366e+06	4.05705e+06
2-(3,4-dihydroxyphenyl)-5,7-dihydroxy-3-[(2S,3R,4S,5S,6R)-3,4,5-trihydroxy-6-[[(2S,3R,4S,5R)-3,4,5-trihydroxyoxan-2-yl]oxymethyl]oxan-2-yl]oxychromen-4-one	2.73	level2			595.13	155.9	NEG	9.86662e+06	1.08392e+07	1.13424e+07	5.55793e+06	1.06472e+07	8.91515e+06	4.55213e+06	1.26063e+07	1.29346e+07	5.13895e+06	1.19194e+07	6.18888e+06	1.03453e+07	1.45654e+07	1.52966e+07	5.27156e+06	7.38552e+06	7.73958e+06	1.45494e+07	1.60967e+07	1.00079e+07	1.19727e+07	1.28867e+07	8.99666e+06	1.28372e+07	1.24694e+07	7.19721e+06	1.27201e+07
Questiomycin A	2.73	level2			211.051	172.4	NEG	6.53237e+07	7.54028e+07	7.34778e+07	7.30427e+07	6.91707e+07	6.34297e+07	5.57243e+07	8.18132e+07	6.30499e+07	6.54034e+07	6.53758e+07	6.15099e+07	2.4685e+07	3.37824e+07	3.11009e+07	4.44214e+07	3.8628e+07	3.13528e+07	4.27651e+07	4.93781e+07	5.08394e+07	4.53736e+07	3.93224e+07	5.13595e+07	5.38132e+07	4.75283e+07	4.73224e+07	4.94255e+07
N-benzoyl-L-aspartic acid	2.73	level2			238.071	121.8	POS	2.32069e+06	3.26372e+06	2.62399e+06	2.54638e+06	2.20719e+06	1.732e+06	1.46351e+06	2.44851e+06	1.95112e+06	2.05587e+06	1.49692e+06	798402	2.07936e+06	2.52122e+06	2.8996e+06	2.48844e+06	1.51431e+06	1.85121e+06	2.87834e+06	3.79927e+06	5.30953e+06	2.20957e+06	3.185e+06	2.77052e+06	2.42601e+06	2.43769e+06	2.12502e+06	2.59857e+06
Cinchonic acid	2.73	level2			172.04	41.4	NEG	3.72239e+06	3.79327e+06	3.36034e+06	3.80358e+06	4.1789e+06	3.44732e+06	3.85459e+06	5.219e+06	3.99684e+06	4.26688e+06	3.92248e+06	4.41539e+06	2.25e+06	1.73147e+06	1.79307e+06	2.80463e+06	1.87651e+06	2.11108e+06	3.40082e+06	4.20841e+06	4.57658e+06	4.65409e+06	3.30597e+06	3.62226e+06	3.7783e+06	3.29165e+06	3.31409e+06	3.33356e+06
3-Phenyllactic acid	2.73	level2			165.055	9.4	NEG	4.83793e+06	762953	3.57325e+06	5.8311e+06	5.64857e+06	4.72823e+06	5.01494e+06	4.01762e+06	5.44267e+06	467515	4.13115e+06	3.4716e+06	4.12867e+06	479296	5.303e+06	5.06963e+06	3.73353e+06	985358	5.15816e+06	4.17746e+06	5.70585e+06	845667	4.84181e+06	8.48834e+06	4.86285e+06	4.34099e+06	3.48046e+06	6.35915e+06
8-(2-hexylcyclopropyl)octanoic acid	2.73	level2			267.233	318.4	NEG	1.00305e+08	1.12145e+08	1.02192e+08	1.1702e+08	1.19839e+08	1.22166e+08	1.32206e+08	1.1986e+08	1.31175e+08	1.40281e+08	1.25364e+08	1.31687e+08	1.3917e+08	1.23117e+08	1.26921e+08	9.06325e+07	1.23895e+08	1.04112e+08	1.14679e+08	1.33455e+08	1.16677e+08	1.23452e+08	1.28809e+08	1.30591e+08	1.002e+08	1.19087e+08	1.05708e+08	1.33352e+08
(2Z,6E)-6-methyl-2-(4-methylpent-3-enyl)octa-2,6-dienoic acid	2.73	level2			235.17	284.7	NEG	1.87132e+07	1.97814e+07	2.8777e+07	2.05512e+07	4.0102e+07	2.01973e+07	1.79188e+07	1.79486e+07	1.79829e+07	3.40809e+07	1.61664e+07	1.51919e+07	1.9918e+07	1.82835e+07	2.01931e+07	1.86227e+07	1.81029e+07	1.77069e+07	1.87271e+07	2.11509e+07	2.84846e+07	2.29443e+07	2.04378e+07	3.48813e+07	3.54182e+07	1.88148e+07	3.16801e+07	1.96383e+07
PC(38:5)	2.73	level2			790.576	350	POS	4.02823e+06	4.06887e+06	3.15792e+06	4.06354e+06	4.26307e+06	3.55048e+06	5.15232e+06	3.81056e+06	5.00043e+06	3.34818e+06	4.3489e+06	3.15182e+06	1.47856e+06	1.97598e+06	1.93966e+06	1.87145e+06	1.3411e+06	1.69478e+06	2.48207e+06	3.02828e+06	2.85269e+06	2.33848e+06	2.66104e+06	2.78648e+06	3.34386e+06	2.84312e+06	2.80801e+06	3.02146e+06
(2Z,6E,10Z)-12-acetoxy-10-(acetoxymethyl)-6-methyl-2-(4-methylpent-3-enyl)dodeca-2,6,10-trienoic acid	2.73	level2			419.244	334.3	NEG	1.58945e+07	1.46797e+07	9.90454e+06	1.74437e+07	1.20322e+07	1.51836e+07	1.77845e+07	1.65993e+07	2.0083e+07	2.14107e+07	1.51989e+07	1.41699e+07	2.1611e+07	2.12152e+07	2.63691e+07	2.08131e+07	1.85183e+07	1.72385e+07	1.82261e+07	2.08396e+07	2.36447e+07	2.75135e+07	2.5183e+07	2.06682e+07	1.69803e+07	1.72693e+07	1.75664e+07	1.88132e+07
N-Methyl-L-proline	2.72	level2			130.086	324.9	POS	6.74261e+07	2.35068e+07	4.07379e+07	7.98326e+07	8.48156e+07	1.00274e+08	9.23098e+07	8.96654e+07	7.93385e+07	5.12688e+07	1.09667e+08	3.7412e+07	4.51652e+07	2.67169e+07	7.52924e+07	8.90346e+07	4.22831e+07	7.01019e+07	6.8534e+07	4.66643e+07	7.46673e+07	7.91213e+07	2.48949e+07	1.06561e+08	7.10788e+07	2.21273e+07	5.41656e+07	2.86139e+07
Homoarecoline	2.72	level2			170.118	290.5	POS	4.00115e+06	2.27563e+06	9.08444e+06	825925	2.4891e+06	1.56049e+07	2.49207e+06	1.27761e+06	648846	2.26385e+06	2.18257e+06	2.40156e+06	2.03529e+07	915507	1.24333e+06	6.75399e+06	1.09552e+06	3.73574e+06	2.22093e+06	1.80719e+07	8.62725e+06	8.62533e+06	2.00996e+06	2.11212e+06	4.58875e+06	4.77198e+06	4.88783e+06	4.41777e+06
(R)-Campholenic_aldehyde	2.72	level2			153.127	278.6	POS	3.5807e+06	3.46156e+06	5.43314e+06	2.69439e+06	5.38916e+06	5.11543e+06	7.23592e+06	9.60948e+06	6.90939e+06	7.76748e+06	6.88687e+06	7.0593e+06	3.63147e+06	2.61982e+06	5.28582e+06	5.73532e+06	2.7845e+06	2.24103e+06	0	4.07731e+06	4.46461e+06	2.09904e+06	5.27423e+06	4.14458e+06	5.32339e+06	5.23024e+06	5.51562e+06	3.78899e+06
3-Oxo-12,18-ursadien-28-oic_acid	2.72	level2			453.337	260.7	POS	1.94891e+06	1.67336e+06	2.86708e+06	1.19368e+06	2.63019e+06	2.40933e+06	3.41343e+06	2.50684e+06	3.4952e+06	2.76672e+06	2.56152e+06	3.68458e+06	1.86895e+06	2.96573e+06	2.1513e+06	1.47689e+06	2.42444e+06	1.95169e+06	2.91081e+06	2.2719e+06	1.65535e+06	2.96835e+06	2.39014e+06	2.2036e+06	2.05818e+06	1.85777e+06	2.26608e+06	2.50565e+06
(R)-11,12,13-Trinor-1(5),6,9-guaiatrien-8-one	2.72	level2			175.112	232.9	POS	2.44537e+07	2.90904e+07	3.20136e+07	2.05858e+07	1.90373e+07	3.0635e+07	3.50468e+07	4.07216e+07	2.98015e+07	3.98769e+07	3.97085e+07	3.73762e+07	2.75359e+07	2.41449e+07	2.77099e+07	2.64717e+07	2.43792e+07	2.77696e+07	2.93781e+07	3.13042e+07	3.61514e+07	3.16603e+07	3.2536e+07	2.05293e+07	3.04983e+07	1.99238e+07	3.10597e+07	1.39848e+07
TERPINEN-4-OL	2.72	level2			153.128	231.9	NEG	1.28278e+07	7.46002e+06	7.24204e+06	7.8346e+06	8.57034e+06	1.25505e+07	1.39369e+07	1.01246e+07	1.76841e+07	8.5869e+06	9.77768e+06	7.923e+06	8.53914e+06	1.03076e+07	9.34074e+06	1.09668e+07	8.71403e+06	7.52337e+06	9.53042e+06	9.75957e+06	1.37614e+07	1.09255e+07	1.0459e+07	9.9438e+06	9.98275e+06	1.21262e+07	9.75181e+06	9.87509e+06
isoferulic acid	2.72	level2			193.051	181.7	NEG	2.15969e+07	2.13576e+07	2.54781e+07	2.49735e+07	2.48034e+07	2.41559e+07	3.05693e+07	2.62185e+07	3.33375e+07	2.93447e+07	2.399e+07	2.62243e+07	2.2244e+07	2.25333e+07	2.27655e+07	2.17975e+07	2.69372e+07	2.13907e+07	2.20322e+07	2.66221e+07	2.50638e+07	2.08899e+07	2.41336e+07	2.23115e+07	2.40008e+07	2.34103e+07	2.48969e+07	2.55527e+07
Eremanthin	2.72	level2			253.134	176.8	POS	2.8385e+07	3.55021e+07	1.76514e+07	2.42311e+07	9.63131e+06	2.00585e+07	1.22028e+07	2.21472e+07	1.25702e+07	2.08281e+07	1.0792e+07	1.12567e+07	1.63334e+08	9.99794e+07	1.19882e+08	1.72934e+08	1.15836e+08	1.35274e+08	2.05552e+07	2.88388e+07	1.90837e+07	3.82692e+07	2.69422e+07	1.43855e+07	5.16575e+07	5.15429e+07	5.47265e+07	5.18911e+07
1-(4-Hydroxy-3,5-dimethoxyphenyl)-7-(4-hydroxy-3-methoxyphenyl)-3,5-heptanediol	2.72	level2			407.207	166.9	POS	1.55084e+07	1.61534e+07	1.55607e+07	2.19856e+07	1.23177e+07	1.4938e+07	1.26108e+07	1.26359e+07	1.32778e+07	1.17344e+07	1.17743e+07	8.99831e+06	3.21487e+07	2.6889e+07	2.85203e+07	3.29255e+07	2.58742e+07	3.01766e+07	1.95453e+07	2.42977e+07	1.89383e+07	2.3489e+07	1.84461e+07	1.72249e+07	1.91337e+07	1.9346e+07	1.97255e+07	1.92062e+07
4-(Ethoxymethyl)-2-methoxyphenol	2.72	level2			183.102	142.7	POS	8.33354e+06	7.95124e+06	6.94997e+06	6.52164e+06	8.98353e+06	1.4959e+07	8.61328e+06	8.50857e+06	1.29359e+07	1.55522e+07	7.57735e+06	1.75198e+07	1.06439e+07	1.14909e+07	1.10584e+07	1.16349e+07	1.0852e+07	1.05858e+07	1.97219e+07	1.06603e+07	1.36861e+07	2.31653e+07	1.42615e+07	1.12699e+07	1.07756e+07	1.93502e+07	1.05737e+07	1.06557e+07
N'-Nitrosoanabasine	2.72	level2			192.113	42.5	POS	1.24295e+08	1.45118e+08	8.56488e+07	1.20781e+08	8.85704e+07	1.04057e+08	8.82164e+07	1.25813e+08	9.36467e+07	1.26428e+08	7.89917e+07	8.08643e+07	7.54301e+08	4.44857e+08	5.18573e+08	7.07552e+08	4.99512e+08	5.63136e+08	1.31321e+08	1.64674e+08	1.20473e+08	1.83998e+08	1.80493e+08	9.94929e+07	2.45526e+08	2.44577e+08	2.53861e+08	2.46246e+08
Pyridine	2.72	level2			80.0494	31.2	POS	2.73206e+08	3.49727e+08	2.63343e+08	3.55062e+08	3.64861e+08	3.33075e+08	3.04037e+08	3.3767e+08	3.46162e+08	2.52822e+08	3.17269e+08	2.32273e+08	2.28671e+08	2.37419e+08	2.4299e+08	2.57224e+08	2.3069e+08	2.34173e+08	3.58152e+08	3.67922e+08	3.25551e+08	3.47843e+08	2.49693e+08	3.61495e+08	3.49874e+08	3.29646e+08	2.67068e+08	3.18255e+08
Betonicine	2.72	level2			160.097	25.4	POS	6.95012e+06	8.43026e+06	8.92645e+06	6.56301e+06	5.53048e+06	5.58949e+06	6.06587e+06	5.96925e+06	6.60142e+06	4.64845e+06	7.18705e+06	7.27213e+06	3.74984e+06	3.82327e+06	5.77139e+06	3.97149e+06	3.47862e+06	3.07434e+06	7.78645e+06	9.71597e+06	7.28352e+06	5.17638e+06	5.96037e+06	8.77931e+06	7.15568e+06	8.49572e+06	4.57964e+06	5.86374e+06
Swainsonine	2.72	level2			174.112	342.7	POS	251067	435818	319432	776301	681915	836946	539569	882040	811335	816754	890727	384535	741355	312163	475045	524108	433998	718630	1.13069e+06	993859	479340	782249	958772	1.03949e+06	1.36442e+06	1.14622e+06	945955	711523
ponasterone_A	2.72	level2			463.307	304.5	NEG	943995	962991	607260	1.11049e+06	624662	904425	1.60264e+06	1.25921e+06	1.7295e+06	1.52572e+06	1.22585e+06	1.49784e+06	775026	1.0121e+06	980664	529756	2.14027e+06	1.46186e+06	1.49177e+06	1.49271e+06	1.74551e+06	1.13551e+06	2.03054e+06	1.79839e+06	1.08461e+06	1.21815e+06	1.32245e+06	1.3648e+06
11,12,13-trihydroxy-4,5,8-trimethyl-3-(2-methylpropyl)-1H,2H,3H,4H,6aH,9H,10H,11H,12H,13H,14H,15H,15bH-cycloundeca[e]isoindole-1,15-dione	2.72	level2			418.317	280.9	POS	9.44529e+06	1.04169e+07	1.10045e+07	1.02759e+07	7.96743e+06	9.10186e+06	1.0885e+07	1.33159e+07	1.23689e+07	1.12121e+07	9.48211e+06	1.13409e+07	1.31359e+07	9.99307e+06	1.36395e+07	1.04236e+07	9.65081e+06	8.67799e+06	1.16247e+07	1.33732e+07	1.52822e+07	1.33537e+07	1.27137e+07	1.30804e+07	1.11371e+07	1.07838e+07	1.24305e+07	1.17251e+07
6,8-dihydroxy-3-(10-hydroxyundecyl)-3,4-dihydroisochromen-1-one	2.72	level2			349.201	262.1	NEG	1.60007e+07	1.38674e+07	1.36493e+07	1.21348e+07	1.45055e+07	1.5551e+07	1.67368e+07	1.60349e+07	1.29599e+07	1.56453e+07	1.74885e+07	1.40446e+07	1.42522e+07	1.24887e+07	1.62267e+07	1.16134e+07	1.30103e+07	1.15922e+07	1.31676e+07	1.43424e+07	1.23053e+07	1.38861e+07	1.4765e+07	1.35434e+07	1.59154e+07	1.50921e+07	1.35462e+07	1.70915e+07
Jasmonic acid	2.72	level2			209.118	255	NEG	3.46699e+06	4.35551e+06	3.09545e+06	4.72724e+06	5.06911e+06	3.78703e+06	3.71193e+06	4.60203e+06	3.60984e+06	3.88736e+06	3.81113e+06	3.20175e+06	4.07978e+06	3.78694e+06	4.03527e+06	5.35066e+06	4.41078e+06	4.86594e+06	3.74999e+06	4.03831e+06	3.55796e+06	3.33669e+06	3.46087e+06	4.51577e+06	4.11042e+06	3.96575e+06	3.55963e+06	3.80359e+06
Premarrubiin	2.72	level2			333.207	231	POS	1.6448e+08	1.53482e+08	3.56922e+08	9.17305e+07	8.88444e+07	9.23264e+07	2.78673e+08	9.70834e+07	1.28194e+08	9.10764e+07	8.89092e+07	1.68588e+08	2.44065e+08	1.99958e+08	1.69086e+08	2.05835e+08	2.82094e+08	1.9137e+08	1.25941e+08	1.38223e+08	1.49316e+08	1.65581e+08	8.10429e+07	8.57956e+07	1.33778e+08	1.05982e+08	1.09607e+08	1.16626e+08
Alismoxide	2.72	level2			239.2	221.7	POS	8.60506e+06	8.81199e+06	9.58654e+06	4.95292e+06	9.1427e+06	1.74248e+07	1.91245e+07	1.18517e+07	1.07206e+07	1.14704e+07	1.31446e+07	1.92143e+07	2.83272e+07	1.22838e+07	1.18193e+07	2.80281e+07	1.17192e+07	1.04012e+07	1.55229e+07	2.15098e+07	2.83475e+07	3.13572e+07	3.17128e+07	1.7234e+07	1.18545e+07	1.85299e+07	2.05717e+07	1.00348e+07
Piquerol_A	2.72	level2			167.106	220.8	POS	1.53235e+07	2.13917e+07	1.47323e+07	2.3574e+07	1.064e+07	1.17582e+07	1.54065e+07	1.09651e+07	1.45986e+07	1.38434e+07	1.74718e+07	1.23534e+07	1.38019e+07	1.30496e+07	1.41321e+07	1.34553e+07	1.25028e+07	1.18516e+07	1.43635e+07	1.64722e+07	1.50965e+07	2.78396e+07	1.06154e+07	1.48438e+07	1.4745e+07	1.50798e+07	1.46537e+07	1.06515e+07
(2alpha,5alpha,9alpha,10beta,14beta)-2,5,9,10-Tetraacetoxytaxa-4(20),11-dien-14-yl_2-methylbutanoate	2.72	level2			643.287	161	POS	3.78417e+06	5.21941e+06	2.75052e+06	3.65515e+06	2.89866e+06	3.48017e+06	6.04777e+06	5.5317e+06	7.60928e+06	3.94993e+06	5.977e+06	3.46181e+06	5.12997e+06	4.49892e+06	6.24614e+06	3.34056e+06	4.11514e+06	2.50381e+06	2.80236e+06	3.81959e+06	2.14155e+06	2.67754e+06	3.17001e+06	4.39671e+06	3.69445e+06	4.12569e+06	3.90535e+06	3.928e+06
ISOFEBRIFUGINE (B604866K055)	2.72	level2			302.151	147	POS	3.15634e+06	3.50281e+06	870548	2.01638e+06	1.62985e+06	2.55933e+06	1.05705e+06	2.89632e+06	1.17378e+06	3.14601e+06	923596	844054	2.87026e+07	1.69639e+07	2.27825e+07	2.58035e+07	1.97453e+07	2.25102e+07	5.15716e+06	7.44674e+06	3.84087e+06	5.90102e+06	7.54448e+06	2.32958e+06	7.52745e+06	8.0215e+06	8.06031e+06	8.30252e+06
(3R)-5-methyl-3-[(2S,3R,4S,5S,6R)-3,4,5-trihydroxy-6-(hydroxymethyl)oxan-2-yl]oxy-3-[[4-[(2S,3R,4S,5S,6R)-3,4,5-trihydroxy-6-(hydroxymethyl)oxan-2-yl]oxyphenyl]methoxycarbonyl]hexanoic acid	2.72	level2			619.225	143.3	NEG	190634	332542	605335	284875	236383	227513	531165	606430	1.67491e+06	731713	610244	312209	54110.5	0	168866	53445.7	136137	45973	215193	135912	127365	207846	210438	117486	294280	152130	447308	317986
(1S,4S,5R,9S,10R,13R,14S)-5-(Acetyloxymethyl)-14-hydroxy-14-(hydroxymethyl)-9-methyltetracyclo[11.2.1.01,10.04,9]hexadecane-5-carboxylic acid	2.72	level2			393.228	241.9	NEG	9.67639e+06	1.29213e+07	7.99052e+06	8.77473e+06	8.61527e+06	1.70999e+07	1.09559e+07	1.81048e+07	1.46959e+07	9.88209e+06	1.19035e+07	9.99426e+06	3.08689e+07	6.02786e+06	1.49848e+07	7.28548e+06	1.01322e+07	9.31159e+06	5.93431e+06	1.06771e+07	1.52519e+07	1.1033e+07	7.0123e+06	1.48334e+07	1.28608e+07	1.64009e+07	9.76643e+06	9.43242e+06
(4E,7E)-dodeca-4,7-dienedioic acid	2.72	level2			225.113	221.3	NEG	1.30612e+08	1.41707e+08	1.2407e+08	1.33882e+08	1.30909e+08	1.33907e+08	1.37721e+08	1.2165e+08	1.54325e+08	1.28768e+08	1.1751e+08	9.80124e+07	1.07415e+08	1.16704e+08	1.16996e+08	1.05079e+08	1.31748e+08	9.60915e+07	9.44305e+07	1.10518e+08	1.3136e+08	1.19937e+08	1.20775e+08	1.32163e+08	1.20936e+08	1.15449e+08	1.23604e+08	1.1805e+08
N-Hexadecanoylpyrrolidine	2.71	level2			310.31	324.9	POS	4.0946e+07	4.38356e+07	4.04433e+07	8.97181e+07	8.71094e+07	5.89121e+07	4.76877e+07	3.46888e+07	3.74412e+07	4.079e+07	4.89907e+07	3.76112e+07	3.22637e+07	3.27232e+07	3.06624e+07	3.14117e+07	4.77893e+07	4.40744e+07	4.06005e+07	5.46482e+07	3.19465e+07	3.32874e+07	6.46688e+07	5.67826e+07	4.37189e+07	5.59004e+07	4.99762e+07	6.04287e+07
2,4-Di-tert-butylphenol	2.71	level2			205.159	286	NEG	6.67271e+06	7.14025e+06	8.40629e+06	9.53715e+06	9.49107e+06	8.69722e+06	6.79914e+06	5.99081e+06	7.87863e+06	7.12725e+06	7.21565e+06	7.70937e+06	7.16124e+06	7.18972e+06	7.95492e+06	6.45892e+06	8.66796e+06	8.3807e+06	7.04864e+06	1.06503e+07	6.88592e+06	8.17896e+06	7.2599e+06	8.20932e+06	7.57581e+06	7.47062e+06	8.23694e+06	8.48466e+06
Dehydroevodiamine	2.71	level2			302.128	223.7	POS	1.73738e+06	1.50848e+06	799105	2.50493e+06	1.37464e+06	1.53363e+06	5.89049e+06	7.11936e+06	1.03403e+07	6.01716e+06	2.71399e+06	1.03094e+07	7.08076e+06	9.07674e+06	9.1419e+06	9.63428e+06	6.93409e+06	6.80829e+06	1.01083e+07	8.1522e+06	1.28008e+07	1.25833e+07	8.35833e+06	1.00167e+07	7.67268e+06	6.94153e+06	6.70002e+06	7.20907e+06
INDOLE-3-ACETALDEHYDE	2.71	level2			158.061	196.2	NEG	5.97459e+06	6.69751e+06	6.05631e+06	6.97385e+06	6.29628e+06	6.11464e+06	6.19974e+06	7.38771e+06	5.72224e+06	7.41714e+06	5.87956e+06	6.08907e+06	5.13593e+06	1.07586e+07	4.99534e+06	5.24615e+06	4.7203e+06	6.61927e+06	5.13745e+06	6.42825e+06	5.76395e+06	4.44981e+06	5.88503e+06	6.13496e+06	6.68497e+06	6.27118e+06	5.83151e+06	6.30566e+06
ellipticine	2.71	level2			247.119	109.2	POS	2.51717e+06	3.05588e+06	726209	983722	1.38231e+06	2.90286e+06	2.19282e+06	2.30248e+06	2.79145e+06	2.27341e+06	1.68621e+06	482584	1.47191e+07	1.05617e+07	9.51722e+06	1.75034e+07	5.67015e+06	1.31144e+07	3.44665e+06	4.24921e+06	3.51726e+06	2.42247e+06	4.313e+06	2.26071e+06	2.97838e+06	5.41457e+06	4.33103e+06	5.1502e+06
L-1,2,3,4-Tetrahydro-beta-carboline-3-carboxylic_acid	2.71	level2			217.097	93.4	POS	8.62139e+06	5.83175e+06	7.23335e+06	6.3296e+06	8.84837e+06	8.46506e+06	9.46431e+06	1.05377e+07	9.56215e+06	8.24718e+06	6.79336e+06	8.89583e+06	5.51883e+06	7.07458e+06	5.66292e+06	7.34383e+06	5.19131e+06	6.63505e+06	7.33971e+06	7.24845e+06	7.90928e+06	7.70038e+06	6.07895e+06	7.39146e+06	6.3539e+06	8.1879e+06	7.37109e+06	8.30506e+06
4-Hydroxybenzoylcholine	2.71	level2			224.128	8.6	POS	1.60706e+06	1.59155e+06	1.42465e+06	1.43739e+06	1.6559e+06	1.55076e+06	1.34228e+06	1.4573e+06	1.43873e+06	1.38691e+06	1.23809e+06	1.64055e+06	2.65923e+06	1.75546e+06	1.54807e+06	1.81267e+06	1.51691e+06	1.75169e+06	1.38642e+06	2.8649e+06	1.36326e+06	1.4274e+06	1.88621e+06	1.57541e+06	1.59876e+06	1.45782e+06	1.45198e+06	1.59468e+06
falcarindiol	2.71	level2			259.17	294.6	NEG	4.05738e+06	4.45421e+06	3.93356e+06	5.31193e+06	5.12693e+06	4.06296e+06	4.01959e+06	5.25446e+06	4.67363e+06	5.0362e+06	4.24906e+06	3.60836e+06	4.6478e+06	3.97345e+06	4.04289e+06	4.85994e+06	3.97846e+06	4.4006e+06	4.12156e+06	4.7276e+06	4.32537e+06	4.49502e+06	3.4984e+06	5.33034e+06	4.11791e+06	4.29206e+06	4.81965e+06	4.72331e+06
Methylephedrine	2.71	level2			180.138	243.5	POS	1.89338e+07	1.67153e+07	1.7269e+07	1.74707e+07	1.77958e+07	1.85934e+07	2.45495e+07	2.41183e+07	2.67713e+07	2.23218e+07	2.35187e+07	2.30392e+07	1.407e+07	1.44449e+07	1.50635e+07	1.54143e+07	1.29995e+07	1.31534e+07	1.6629e+07	1.94373e+07	1.96099e+07	1.97473e+07	1.71513e+07	1.77453e+07	1.87562e+07	1.94123e+07	1.9181e+07	1.94591e+07
Isotetrandrine	2.71	level2			645.292	218.5	POS	726102	777221	913186	553807	676885	624569	355568	717004	579875	489430	374410	316916	118498	91452.4	315214	171636	72601.5	82554.5	284543	451334	617230	548025	490071	347523	297736	649112	508558	640244
Gentisyl alcohol	2.71	level2			141.054	138.8	POS	2.24542e+06	2.18901e+06	2.09486e+06	2.3495e+06	2.22587e+06	2.21936e+06	1.52643e+06	2.20325e+06	2.3424e+06	1.51015e+06	2.31559e+06	2.34616e+06	2.19347e+06	2.39231e+06	2.37625e+06	2.23691e+06	2.2176e+06	2.43544e+06	2.13692e+06	2.04456e+06	2.40642e+06	2.31606e+06	2.56981e+06	2.19227e+06	2.51156e+06	1.34492e+06	2.15042e+06	1.96858e+06
alpha-licanic_acid	2.71	level2			293.211	254.6	POS	3.03562e+07	3.02135e+07	4.77507e+07	6.54356e+07	4.99918e+07	7.40395e+07	2.72993e+07	3.37652e+07	2.85448e+07	2.89696e+07	2.79759e+07	2.61952e+07	6.2876e+07	2.92304e+07	3.02204e+07	6.27539e+07	2.82409e+07	2.90536e+07	2.51837e+07	6.44994e+07	2.83048e+07	2.98445e+07	2.59826e+07	2.88569e+07	6.35674e+07	2.80398e+07	2.78732e+07	6.36722e+07
2,4,6-Trihydroxybenzoic acid	2.71	level2			169.014	179.5	NEG	1.18049e+06	312223	299875	172191	413190	738950	519518	271812	565751	158107	0	224007	3.44459e+06	4.01163e+06	5.26426e+06	1.80849e+06	1.6226e+06	3.27969e+06	699534	1.73747e+06	420787	298149	0	0	903523	651829	681977	685626
Meisoindigo	2.71	level2			277.097	215.2	POS	4.47948e+06	5.71721e+06	3.25847e+06	5.71464e+06	4.97006e+06	3.55161e+06	2.22518e+06	3.61605e+06	2.01508e+06	4.07772e+06	2.0714e+06	1.29794e+06	2.15937e+07	1.40442e+07	1.40069e+07	2.51818e+07	1.54734e+07	1.90621e+07	5.19292e+06	5.76204e+06	4.25375e+06	7.1572e+06	4.19398e+06	4.27278e+06	7.42693e+06	7.62559e+06	8.59034e+06	8.03728e+06
Ginsenoside Rh1	2.7	level2			683.436	333.6	NEG	1.81976e+06	2.16252e+06	1.20689e+06	1.61128e+06	1.17893e+06	1.77316e+06	1.01366e+06	858080	1.01251e+06	987891	525493	1.23435e+06	2.6141e+06	2.13265e+06	2.73101e+06	2.27462e+06	2.08745e+06	2.11917e+06	2.97347e+06	3.67364e+06	4.22369e+06	3.29701e+06	2.52233e+06	3.26749e+06	1.96965e+06	1.71465e+06	1.48853e+06	1.69959e+06
Solasodiene (not validated)	2.7	level2			396.326	326.2	POS	2.24146e+06	3.86731e+06	3.61217e+06	2.7871e+06	3.09758e+06	1.92947e+06	1.47258e+06	3.0104e+06	2.40866e+06	3.77099e+06	3.63769e+06	2.84052e+06	3.37628e+06	701536	2.46407e+06	3.33726e+06	3.02348e+06	4.16527e+06	2.41473e+06	3.06357e+06	2.74825e+06	2.62942e+06	1.81417e+06	3.55177e+06	2.90174e+06	3.59548e+06	2.99277e+06	3.1944e+06
Myrsinone	2.7	level2			295.19	241.4	POS	5.99678e+06	4.04809e+06	4.87337e+06	4.3611e+06	4.33665e+06	7.10392e+06	7.85037e+06	4.30991e+06	6.45015e+06	3.70968e+06	5.79642e+06	4.93816e+06	3.10699e+06	2.97961e+06	3.93489e+06	4.65858e+06	4.44953e+06	4.28678e+06	4.73016e+06	4.37174e+06	4.42938e+06	5.42244e+06	4.34935e+06	3.75478e+06	4.83114e+06	4.69048e+06	4.82389e+06	5.03754e+06
Thymyl_acetate	2.7	level2			193.122	233.6	POS	7.86762e+07	6.79303e+07	7.88126e+07	6.08684e+07	6.8791e+07	8.38246e+07	1.02407e+08	1.04941e+08	9.0278e+07	9.40337e+07	1.06772e+08	9.56226e+07	5.05294e+07	3.97542e+07	4.42834e+07	4.8243e+07	4.14089e+07	3.9387e+07	4.91935e+07	6.03522e+07	5.99666e+07	5.01235e+07	6.58718e+07	6.75519e+07	6.84429e+07	7.16192e+07	6.9711e+07	7.16074e+07
Di-n-pentyl_phthalate	2.7	level2			307.19	217.8	POS	1.04194e+07	1.22214e+07	8.39004e+06	1.19854e+07	1.27694e+07	1.03655e+07	1.17747e+07	1.60151e+07	1.12796e+07	1.02821e+07	1.60756e+07	1.34293e+07	1.11791e+07	1.23379e+07	1.39075e+07	7.75686e+06	1.24227e+07	9.55386e+06	1.05956e+07	1.42306e+07	1.22434e+07	1.14774e+07	1.29876e+07	1.58673e+07	1.18083e+07	1.19519e+07	1.20309e+07	1.23412e+07
UHQ (mixed MS2 C11:db:UHQ)	2.7	level2			300.232	197.6	POS	6.90718e+06	6.63073e+06	7.2457e+06	6.80802e+06	4.90364e+06	7.15397e+06	8.38439e+06	1.3009e+07	8.13392e+06	9.31983e+06	9.29435e+06	9.36142e+06	4.88651e+06	4.13793e+06	4.52359e+06	4.38599e+06	4.08608e+06	4.00979e+06	4.64294e+06	6.11508e+06	4.65124e+06	5.82828e+06	3.49891e+06	5.34801e+06	6.33901e+06	6.824e+06	6.13205e+06	6.32056e+06
Carotamine	2.7	level2			272.103	80.2	POS	7.12034e+06	6.52534e+06	1.59496e+06	8.51274e+06	6.4164e+06	3.52229e+06	2.23776e+06	5.87014e+06	5.0788e+06	6.7544e+06	4.16276e+06	3.39719e+06	6.80157e+07	4.6006e+07	5.62741e+07	7.01363e+07	5.20968e+07	5.30538e+07	7.83624e+06	1.52812e+07	1.12472e+07	1.72124e+07	1.83986e+07	3.66836e+06	2.17642e+07	2.22317e+07	2.25883e+07	2.25519e+07
Medicagenic acid	2.7	level2			501.322	340.9	NEG	8.68696e+06	8.32828e+06	8.04842e+06	9.76995e+06	8.37159e+06	7.48219e+06	6.39529e+06	8.86908e+06	7.0511e+06	7.93393e+06	7.0626e+06	7.98981e+06	1.10329e+07	7.46747e+06	8.2019e+06	1.0445e+07	8.9816e+06	7.35608e+06	5.66615e+06	6.18138e+06	6.82691e+06	7.97093e+06	6.23389e+06	6.5434e+06	7.48779e+06	7.36946e+06	8.46376e+06	7.83432e+06
Diatoxanthin/_7,8-Didehydrozeaxanthin	2.7	level2			567.42	310.8	POS	4.37324e+07	4.33093e+07	5.3879e+07	5.38827e+07	8.71821e+07	4.47877e+07	4.71747e+07	5.48572e+07	4.61398e+07	4.74278e+07	4.44427e+07	4.56514e+07	3.70448e+07	3.22592e+07	2.74396e+07	5.63947e+07	3.54363e+07	3.59829e+07	4.44141e+07	3.93198e+07	3.80361e+07	4.18387e+07	3.2844e+07	4.12252e+07	4.56836e+07	4.96201e+07	5.79416e+07	4.49441e+07
MAG	2.7	level2			379.284	307.2	POS	2.43656e+06	3.24643e+06	2.39243e+06	3.26735e+06	2.98407e+06	2.16991e+06	1.76828e+06	3.4756e+06	2.12603e+06	2.74056e+06	2.60859e+06	2.41175e+06	3.35458e+06	2.83994e+06	3.14299e+06	2.92373e+06	2.75701e+06	3.43129e+06	5.00717e+06	5.15725e+06	4.02986e+06	3.85493e+06	3.92711e+06	6.80705e+06	2.9173e+06	3.45175e+06	3.39552e+06	3.30645e+06
Lathyrol	2.7	level2			335.222	243.5	POS	8.62493e+07	4.66518e+07	6.87075e+07	4.55664e+07	4.79091e+07	9.65441e+07	1.01322e+08	5.59902e+07	4.22732e+07	5.86433e+07	6.14295e+07	5.4166e+07	4.43759e+07	4.79535e+07	4.62998e+07	8.28692e+07	4.16575e+07	4.1114e+07	8.13725e+07	5.52961e+07	4.87796e+07	4.81656e+07	5.5746e+07	9.45704e+07	5.00703e+07	5.08606e+07	8.75822e+07	4.98335e+07
2E,4E-dodecadienoic_acid	2.7	level2			197.153	234.3	POS	8.08648e+06	7.33017e+06	1.03726e+07	3.4354e+06	3.54618e+06	1.0094e+07	1.22255e+07	1.30822e+07	1.31784e+07	1.25008e+07	1.57432e+07	1.23667e+07	3.61467e+06	1.49642e+06	3.8616e+06	1.72154e+06	3.46011e+06	1.00216e+06	2.01634e+06	5.14148e+06	4.06694e+06	4.89073e+06	4.28007e+06	6.24978e+06	3.82446e+06	9.49113e+06	1.01547e+07	9.16435e+06
Di-n-propylphthalate	2.7	level2			251.128	192.8	POS	9.94964e+06	9.89448e+06	8.18724e+06	1.2201e+07	1.82733e+07	7.75312e+06	8.22746e+06	7.14675e+06	1.10318e+07	3.03071e+06	8.62914e+06	0	1.36871e+07	7.33429e+06	1.15962e+07	1.45253e+07	7.08738e+06	8.29273e+06	1.19788e+07	2.62786e+07	2.01424e+07	4.06084e+07	1.03667e+07	7.5629e+06	1.1146e+07	1.02574e+07	1.08872e+07	8.36344e+06
Shanzhiside	2.7	level2			393.141	178.8	POS	2.74599e+06	2.63353e+06	2.79214e+06	2.54334e+06	2.57819e+06	2.59267e+06	2.64262e+06	2.48063e+06	3.17465e+06	2.27483e+06	2.64625e+06	2.26545e+06	2.68782e+06	2.17028e+06	2.32084e+06	2.55445e+06	1.20162e+06	2.17307e+06	2.20981e+06	2.56649e+06	1.97534e+06	2.27516e+06	1.9496e+06	2.16173e+06	2.27488e+06	2.63585e+06	2.35313e+06	2.45745e+06
Rosmic acid	2.7	level2			413.161	177.5	POS	2.31498e+06	2.57329e+06	2.78812e+06	3.29657e+06	3.398e+06	2.66005e+06	1.89662e+06	3.53778e+06	1.87078e+06	3.13987e+06	1.96913e+06	1.81878e+06	1.92057e+06	1.65813e+06	2.08072e+06	3.03817e+06	2.07684e+06	2.726e+06	1.61427e+06	2.45615e+06	1.74847e+06	1.94616e+06	1.7091e+06	2.4629e+06	2.42622e+06	2.39258e+06	2.20078e+06	2.81036e+06
Phenylethyl 2-Glucoside	2.7	level2			283.119	183.6	NEG	5.30663e+07	4.98854e+07	5.05168e+07	5.26153e+07	5.15818e+07	5.03338e+07	4.96639e+07	5.79681e+07	5.091e+07	5.38457e+07	5.42185e+07	5.76034e+07	4.27016e+07	4.05568e+07	3.97363e+07	4.28482e+07	3.6064e+07	3.60695e+07	4.20495e+07	4.68683e+07	5.35531e+07	4.98443e+07	4.74738e+07	5.18027e+07	4.76008e+07	4.73565e+07	4.80918e+07	5.18198e+07
Delcosine	2.7	level2			454.279	221.7	POS	9.24072e+06	8.99894e+06	1.07971e+07	7.94702e+06	1.62177e+07	9.14775e+06	9.84609e+06	1.06656e+07	9.60175e+06	1.07775e+07	1.08225e+07	1.14078e+07	6.55333e+06	4.61981e+06	5.75714e+06	5.17869e+06	5.22178e+06	4.21233e+06	7.75986e+06	1.11791e+07	7.87648e+06	9.04218e+06	1.26353e+07	1.03033e+07	6.97566e+06	8.41866e+06	7.71832e+06	8.38215e+06
[(1R,2E,8S,10R,11S)-10,11-dihydroxy-6-(methoxymethyl)-1,10-dimethyl-5-oxo-4,14-dioxatricyclo[9.2.1.03,7]tetradeca-2,6-dien-8-yl] 2-methylprop-2-enoate	2.7	level2			393.155	206.7	NEG	7.88398e+06	9.76605e+06	7.74092e+06	8.96088e+06	9.12488e+06	6.41191e+06	1.28861e+07	9.64395e+06	1.22868e+07	1.74621e+07	1.04834e+07	1.47047e+07	2.99043e+07	2.09623e+07	1.99587e+07	3.64048e+07	2.46645e+07	2.67123e+07	6.77062e+06	9.77095e+06	9.04856e+06	6.15693e+06	6.08069e+06	1.07158e+07	1.09083e+07	1.15388e+07	1.21501e+07	1.17672e+07
1-Palmitoyllysophosphatidate	2.7	level2			409.236	331.6	NEG	3.93089e+07	2.9214e+07	3.08479e+07	4.72568e+07	3.55801e+07	3.5073e+07	3.43374e+07	3.07344e+07	3.04198e+07	3.43e+07	3.16516e+07	3.51107e+07	3.6545e+07	3.17857e+07	5.61848e+07	3.45004e+07	3.71328e+07	3.57653e+07	3.22536e+07	3.37658e+07	3.82184e+07	3.15982e+07	4.33517e+07	3.13666e+07	4.0283e+07	3.41841e+07	3.28173e+07	3.37086e+07
(ent-15beta)-15,19-Dihydroxy-7-trachylobanone	2.69	level2			319.226	280.9	POS	9.84411e+07	8.86279e+07	8.4786e+07	8.59365e+07	9.00649e+07	1.12748e+08	1.21605e+08	1.02777e+08	9.60046e+07	1.15461e+08	1.29058e+08	1.18325e+08	1.00272e+08	9.23106e+07	9.39371e+07	9.43574e+07	9.1789e+07	8.89604e+07	8.61266e+07	9.9483e+07	8.84866e+07	9.00781e+07	1.0128e+08	9.7826e+07	9.81476e+07	1.05001e+08	1.05963e+08	1.03929e+08
2,2,6,7-Tetramethylbicyclo[4.3.0]nona-1(9),4-dien-8-one	2.69	level2			191.143	208.7	POS	1.78272e+08	1.60901e+08	1.69607e+08	1.56052e+08	1.61979e+08	1.74795e+08	2.35726e+08	1.97622e+08	2.4385e+08	1.7625e+08	2.16691e+08	1.79985e+08	1.45567e+08	1.58737e+08	1.63319e+08	1.3207e+08	1.32484e+08	1.30229e+08	2.00442e+08	2.14367e+08	2.23653e+08	2.05482e+08	2.08028e+08	2.10996e+08	1.76472e+08	1.81235e+08	1.82337e+08	1.83936e+08
Benzoic acid + 1O, O-Hex	2.69	level2			299.077	172.5	NEG	3.5151e+07	3.61283e+07	3.71186e+07	3.60574e+07	3.76164e+07	3.26569e+07	4.49258e+07	1.08723e+08	3.60862e+07	5.10812e+07	4.9354e+07	4.27408e+07	3.62831e+07	2.73109e+07	3.4163e+07	3.20696e+07	3.02659e+07	2.65173e+07	3.29654e+07	8.36444e+07	9.59075e+07	3.21395e+07	9.07337e+07	3.92514e+07	3.89393e+07	3.36096e+07	3.8572e+07	3.65046e+07
Morusin	2.69	level2			421.161	147	POS	1.61564e+06	1.30546e+06	1.55462e+06	1.97674e+06	980032	991663	1.03709e+06	1.42089e+06	1.31604e+06	1.04797e+06	1.34303e+06	1.03024e+06	1.52832e+06	1.48267e+06	1.58831e+06	1.0965e+06	554652	1.98092e+06	1.09648e+06	1.0797e+06	1.85114e+06	1.15952e+06	758720	1.90218e+06	1.40244e+06	1.69006e+06	1.36357e+06	1.13866e+06
Nigellicine	2.69	level2			247.108	43.2	POS	1.56822e+07	1.514e+07	8.68961e+06	1.38747e+07	9.32637e+06	1.68206e+07	1.70416e+07	1.50119e+07	1.93656e+07	1.44833e+07	1.23754e+07	1.23231e+07	4.41295e+07	3.8058e+07	4.36573e+07	5.11058e+07	3.99634e+07	4.2845e+07	1.68789e+07	2.08212e+07	1.87177e+07	2.46095e+07	2.33741e+07	1.36398e+07	2.39007e+07	2.3737e+07	2.62176e+07	2.19724e+07
(2Z,6E,10E)-12-hydroxy-6,10-dimethyl-2-(4-methylpent-3-enyl)dodeca-2,6,10-trienoic acid [IIN-based on	2.69	level2			285.221	208.3	POS	4.43901e+07	3.97165e+07	3.52413e+07	3.45437e+07	3.50052e+07	3.80318e+07	4.31644e+07	4.8539e+07	3.5448e+07	3.87707e+07	4.30842e+07	4.66006e+07	3.27962e+07	3.41415e+07	3.50428e+07	3.17175e+07	3.34771e+07	3.19385e+07	3.49209e+07	3.97006e+07	3.7538e+07	3.69327e+07	3.65552e+07	3.73058e+07	3.51917e+07	3.60221e+07	3.5523e+07	3.61863e+07
Oct-1-en-3-yl Ara (1-6)Glu	2.69	level2			421.208	204	NEG	4.39612e+07	4.16799e+07	3.94074e+07	3.62587e+07	3.86928e+07	3.82637e+07	3.72742e+07	4.49763e+07	4.4772e+07	4.40374e+07	3.86486e+07	3.67534e+07	3.46604e+07	3.15029e+07	3.52277e+07	3.31567e+07	2.98674e+07	2.80436e+07	3.6175e+07	3.92785e+07	3.93704e+07	4.38984e+07	3.79943e+07	3.87346e+07	3.80882e+07	3.78592e+07	3.72098e+07	3.73232e+07
Isobavachalcone	2.69	level2			347.125	183.4	POS	7.30359e+06	6.0827e+06	6.62355e+06	7.6006e+06	7.46521e+06	9.85505e+06	1.10429e+07	6.52106e+06	8.31188e+06	7.09414e+06	1.13243e+07	6.87351e+06	3.54563e+06	5.26111e+06	5.37063e+06	5.03454e+06	2.48207e+06	5.21837e+06	5.40294e+06	5.78394e+06	6.02337e+06	5.64117e+06	5.86665e+06	8.65304e+06	6.40549e+06	6.73862e+06	6.30837e+06	9.65674e+06
Lunarine	2.69	level2			460.219	170.9	POS	1.12605e+07	1.49091e+07	9.80243e+06	1.45812e+07	1.02225e+07	1.28303e+07	1.40219e+07	1.81893e+07	1.47427e+07	1.36567e+07	1.48829e+07	1.15661e+07	3.85969e+06	4.40839e+06	5.37309e+06	4.5867e+06	4.44249e+06	2.13681e+06	7.96804e+06	9.41986e+06	8.34087e+06	8.32765e+06	1.04347e+07	9.49495e+06	1.03918e+07	1.01694e+07	1.04615e+07	1.05702e+07
13-Phenyltridecanoic_acid	2.69	level2			291.232	238.9	POS	1.86154e+07	1.99992e+07	2.09845e+07	1.12266e+07	1.80559e+07	1.90071e+07	1.70349e+07	1.3723e+07	1.25496e+07	1.5164e+07	1.92197e+07	1.4941e+07	1.41922e+07	1.16556e+07	1.83072e+07	1.72281e+07	9.75121e+06	1.44976e+07	1.99116e+07	2.53745e+07	2.59008e+07	1.66314e+07	2.11737e+07	1.63843e+07	1.40015e+07	1.56362e+07	1.34862e+07	1.44596e+07
Cohumulone	2.69	level2			347.187	249.1	NEG	1.09254e+07	9.78872e+06	9.46325e+06	9.02595e+06	1.60983e+07	1.17708e+07	1.07432e+07	1.1077e+07	1.02609e+07	1.73894e+07	1.24958e+07	1.17276e+07	1.40138e+07	1.97051e+07	1.28859e+07	1.21745e+07	1.1414e+07	1.13932e+07	1.39132e+07	1.31401e+07	1.93128e+07	1.37323e+07	1.28569e+07	1.27748e+07	1.20208e+07	1.21264e+07	1.18331e+07	1.14216e+07
Oxononanoylcarnitine	2.69	level2			316.212	138.5	POS	6.96127e+06	1.1538e+07	7.69401e+06	1.47721e+07	1.70365e+07	1.20629e+07	6.36121e+06	6.78164e+06	1.0149e+07	8.71256e+06	8.20569e+06	8.89533e+06	3.40316e+06	6.35658e+06	1.46503e+07	5.72153e+06	9.62491e+06	1.13686e+07	7.67974e+06	1.28789e+07	8.80907e+06	1.04233e+07	7.01385e+06	1.20494e+07	9.56375e+06	9.43672e+06	9.33632e+06	9.83632e+06
Betulin	2.68	level2			443.389	294.1	POS	1.91187e+07	1.77994e+07	2.19667e+07	1.80836e+07	2.10554e+07	1.96377e+07	1.60504e+07	3.15171e+07	2.16043e+07	2.04785e+07	1.32576e+07	3.47369e+07	1.41432e+07	1.53483e+07	1.24527e+07	1.34135e+07	1.08889e+07	1.07268e+07	1.48182e+07	2.11815e+07	2.2086e+07	2.19486e+07	1.97867e+07	2.0064e+07	1.77499e+07	1.97105e+07	1.93832e+07	2.05632e+07
Rosifoliol	2.68	level2			205.195	265.9	POS	1.53914e+07	1.33532e+07	1.54429e+07	1.28439e+07	1.45129e+07	1.69174e+07	1.71634e+07	2.12627e+07	1.61628e+07	1.94219e+07	2.07805e+07	1.73983e+07	1.89995e+07	1.62404e+07	1.75581e+07	2.08514e+07	1.57298e+07	1.67088e+07	2.04093e+07	2.85417e+07	2.83449e+07	1.73775e+07	1.62767e+07	1.73988e+07	1.65479e+07	1.88254e+07	1.3902e+07	1.69995e+07
Panaxytriol	2.68	level2			279.195	221	POS	1.59727e+07	1.53848e+07	1.43745e+07	1.50986e+07	5.48063e+06	1.72873e+07	1.62473e+07	7.43919e+06	1.44918e+07	1.54085e+07	1.84319e+07	1.65786e+07	1.52796e+07	1.51984e+07	1.23519e+07	1.4641e+07	1.53536e+07	1.45634e+07	2.56734e+07	1.79739e+07	2.0881e+07	2.14983e+07	2.11033e+07	2.20867e+07	9.13059e+06	1.64524e+07	1.70293e+07	1.32283e+07
4-Hydroxy-2,6,6-trimethyl-3-oxo-1,4-cyclohexadiene-1-carboxaldehyde	2.68	level2			181.086	194.7	POS	4.51854e+06	3.7393e+06	5.17327e+06	4.90407e+06	4.41757e+06	4.61389e+06	9.51299e+06	4.77153e+06	1.22649e+07	6.10937e+06	8.86311e+06	4.53251e+06	3.93589e+06	4.46939e+06	4.06312e+06	4.32164e+06	3.86414e+06	3.70989e+06	4.30156e+06	4.40062e+06	4.78166e+06	4.65721e+06	4.56484e+06	4.34859e+06	4.72375e+06	4.53063e+06	4.40774e+06	4.58315e+06
16-Methyl-epi-nigakihemiacetal_B	2.68	level2			405.228	190.7	POS	6.61733e+06	6.8205e+06	6.70658e+06	6.33885e+06	6.10306e+06	6.52352e+06	6.09932e+06	8.27146e+06	6.37916e+06	7.2201e+06	6.22823e+06	6.76876e+06	4.1059e+07	3.42892e+07	4.01491e+07	4.98026e+07	3.70975e+07	5.55438e+07	1.85597e+06	5.03039e+06	1.74441e+06	2.08742e+06	4.52338e+06	4.82338e+06	1.1481e+07	1.15736e+07	1.05938e+07	1.04649e+07
aloesin	2.68	level2			395.135	65.1	POS	378549	1.18862e+06	686077	601499	366875	633867	507444	2.178e+06	662559	1.25069e+06	1.1325e+06	806937	0	344832	365961	245976	0	109274	562227	407815	114154	224119	274883	609592	298585	500232	634683	788835
Ainidiol	2.68	level2			443.389	313.1	POS	1.34361e+07	1.38249e+07	9.57792e+06	1.29499e+07	1.50946e+07	1.2732e+07	1.41865e+07	1.74539e+07	1.75485e+07	1.59911e+07	1.25114e+07	1.74846e+07	1.91429e+07	1.43869e+07	9.64115e+06	1.58067e+07	1.78072e+07	6.12082e+06	1.65346e+07	1.42768e+07	1.6648e+07	1.85603e+07	1.24301e+07	2.04319e+07	1.77065e+06	1.20012e+07	1.3927e+07	1.33637e+07
tri-Coumaroyl_spermidine	2.68	level2			583.266	218.6	NEG	7.04885e+06	8.37594e+06	6.27496e+06	7.27619e+06	2.98646e+06	1.87245e+06	2.45028e+06	951687	1.85215e+06	5.34142e+06	2.33914e+06	1.38075e+06	7.28923e+06	7.22816e+06	6.63559e+06	1.03861e+07	6.71089e+06	3.58756e+06	6.32484e+06	9.04647e+06	6.29595e+06	6.55073e+06	5.58848e+06	7.32593e+06	5.41288e+06	5.72958e+06	6.55131e+06	6.93461e+06
7-Geranylformononetin	2.68	level2			405.207	194.6	POS	6.24579e+06	7.06049e+06	7.42872e+06	6.99253e+06	9.34655e+06	6.4386e+06	4.73229e+06	8.19412e+06	7.43556e+06	8.0397e+06	6.32573e+06	5.83645e+06	2.45367e+07	2.26344e+07	2.48777e+07	2.813e+07	1.84539e+07	3.17529e+07	3.40942e+06	2.91422e+06	2.42379e+06	3.10462e+06	5.11063e+06	4.47894e+06	9.08074e+06	7.98951e+06	8.11693e+06	1.91782e+06
Isocurcumenol	2.68	level2			235.17	184.7	POS	1.78769e+07	1.91047e+07	1.48442e+07	1.67203e+07	1.6403e+07	2.37132e+07	3.40941e+07	2.99121e+07	4.6889e+07	2.42192e+07	1.89751e+07	5.21138e+07	1.7271e+07	2.30907e+07	2.02419e+07	1.37223e+07	2.30068e+07	2.05309e+07	3.09296e+07	2.10431e+07	2.29104e+07	1.81115e+07	2.71579e+07	2.71092e+07	2.51681e+07	2.50845e+07	2.4059e+07	2.34333e+07
(2Z,2'Z)-(3R,4R)-2,2-dimethyl-8-oxo-2,3,4,8-tetrahydropyrano[3,2-g]chromene-3,4-diyl bis(2-methylbut-2-enoate)	2.68	level2			449.161	156.8	POS	2.99074e+06	2.49883e+06	1.35098e+06	1.83599e+06	1.09344e+06	2.17121e+06	2.18888e+06	2.05053e+06	2.69611e+06	3.66746e+06	1.11106e+06	2.23565e+06	9.8527e+06	8.4583e+06	1.26296e+07	1.26889e+07	9.04626e+06	1.57289e+07	3.10481e+06	4.2084e+06	2.97774e+06	4.79089e+06	2.96727e+06	1.58083e+06	3.11175e+06	5.9295e+06	4.57068e+06	5.41337e+06
Homoharringtonine	2.68	level2			546.266	151.8	POS	2.11227e+06	2.85774e+06	1.17694e+06	2.42301e+06	2.72847e+06	1.62348e+06	635423	1.19567e+06	653728	1.37759e+06	781949	1.01983e+06	786369	600593	901767	910416	558741	390371	1.9607e+06	1.78e+06	1.41361e+06	2.28448e+06	890566	1.89237e+06	1.20389e+06	1.42625e+06	1.14891e+06	1.2313e+06
Corydaline	2.68	level2			392.182	64.6	POS	310171	398310	187825	286583	0	145524	206025	174549	73293.5	94502.2	173157	169488	968894	4.00451e+06	1.7786e+06	1.97628e+06	1.17236e+06	1.12982e+06	382345	714133	718193	531341	539309	498533	755416	202133	476401	743059
Grayanotoxin_II	2.68	level2			353.232	251.9	POS	2.03221e+07	1.69681e+07	1.7953e+07	1.75436e+07	1.87281e+07	1.97318e+07	2.03438e+07	2.38043e+07	1.80027e+07	2.11731e+07	2.27881e+07	2.90512e+07	1.686e+07	1.45041e+07	1.7045e+07	1.49495e+07	1.57237e+07	1.4024e+07	1.57132e+07	1.5882e+07	1.47084e+07	1.53384e+07	5.44061e+07	1.73294e+07	1.77454e+07	1.83693e+07	1.81695e+07	5.03338e+07
Glyasperin D	2.68	level2			371.192	292.1	POS	2.18159e+07	2.85461e+07	1.20821e+07	1.46279e+07	4.58361e+06	1.62014e+07	2.93529e+06	4.18429e+06	3.56839e+06	4.30982e+06	2.54033e+06	3.77604e+06	9.20732e+07	5.45605e+07	6.38026e+07	6.18188e+07	6.80099e+07	4.91579e+07	3.25245e+07	6.58798e+07	4.40832e+07	3.45525e+07	6.70463e+07	1.75741e+07	3.03048e+07	3.30635e+07	3.25601e+07	3.22698e+07
SM(d18:1/18:0)	2.68	level2			731.603	346	POS	3.6469e+06	2.8887e+06	3.3623e+06	3.12653e+06	3.85245e+06	4.48121e+06	4.9275e+06	5.39944e+06	4.36909e+06	4.65209e+06	4.43668e+06	4.46789e+06	4.12992e+06	2.6071e+06	4.2928e+06	3.6557e+06	2.45519e+06	3.71727e+06	4.48527e+06	4.24483e+06	4.99814e+06	4.65534e+06	5.20924e+06	4.7581e+06	3.70906e+06	3.80913e+06	4.5182e+06	3.58434e+06
Guaiazulene	2.68	level2			199.148	232.9	POS	2.27666e+07	2.09723e+07	2.0592e+07	2.21776e+07	2.40204e+07	2.81402e+07	3.04806e+07	3.05103e+07	2.92383e+07	2.67187e+07	3.02157e+07	2.81751e+07	2.09768e+07	1.99819e+07	2.32522e+07	2.25173e+07	2.67614e+07	2.07653e+07	2.19784e+07	3.0543e+07	2.85761e+07	2.44354e+07	2.56122e+07	2.51268e+07	2.44546e+07	2.44311e+07	2.36683e+07	2.44668e+07
3,4-Dimethylbenzaldehyde	2.68	level2			135.08	251.3	POS	4.65958e+07	5.08881e+07	4.95317e+07	5.13545e+07	4.6274e+07	4.89619e+07	5.22761e+07	4.70691e+07	6.01709e+07	3.88827e+07	4.57144e+07	4.00153e+07	4.28962e+07	5.08233e+07	4.53135e+07	4.16097e+07	3.6098e+07	4.18907e+07	4.9732e+07	5.8317e+07	5.76891e+07	5.40489e+07	5.6964e+07	4.65858e+07	5.10236e+07	4.71211e+07	4.83439e+07	5.06868e+07
Hexadecatrienoylcarnitine	2.68	level2			394.295	265.1	POS	4.70767e+06	4.63872e+06	5.10995e+06	5.4515e+06	4.40619e+06	4.79213e+06	6.93945e+06	6.67588e+06	7.81222e+06	6.49031e+06	6.83793e+06	6.3335e+06	4.42743e+06	3.95271e+06	3.9138e+06	4.16162e+06	3.86942e+06	3.3485e+06	5.7905e+06	6.22974e+06	8.26888e+06	6.38344e+06	6.43932e+06	6.53329e+06	5.62888e+06	5.7688e+06	5.84686e+06	5.50839e+06
(E)-2-Octenal	2.67	level2			127.112	233.6	POS	4.76739e+07	3.85169e+07	3.79772e+07	3.81542e+07	4.14144e+07	6.03999e+07	5.28852e+07	1.26355e+08	5.07898e+07	6.5464e+07	5.80561e+07	5.09546e+07	3.38591e+07	2.78335e+07	3.35942e+07	3.02386e+07	2.67869e+07	2.90601e+07	3.56244e+07	4.06918e+07	4.59008e+07	3.73775e+07	8.74936e+07	5.39157e+07	5.13413e+07	5.26094e+07	4.57985e+07	4.19344e+07
Jasmonic_acid	2.67	level2			211.133	193.3	POS	7.91098e+06	7.63673e+06	8.47557e+06	8.31158e+06	8.00949e+06	8.24497e+06	8.06323e+06	9.01135e+06	7.48382e+06	9.54553e+06	8.99513e+06	8.72738e+06	1.03268e+07	7.71872e+06	6.5937e+06	8.38828e+06	7.74787e+06	7.65207e+06	7.85677e+06	8.07287e+06	9.82131e+06	9.30875e+06	9.3821e+06	9.44562e+06	8.8176e+06	8.95678e+06	7.81448e+06	8.7364e+06
2-Hydroxy-6,7-dimethoxybenzoxazole	2.67	level2			196.06	136.5	POS	1.68982e+07	1.52452e+07	1.31316e+07	1.35304e+07	1.4691e+07	1.68978e+07	1.84274e+07	1.23437e+07	1.96022e+07	1.20808e+07	1.50678e+07	1.36896e+07	1.45012e+07	1.47331e+07	1.12789e+07	1.26683e+07	1.23523e+07	1.42607e+07	1.67228e+07	2.0363e+07	2.06375e+07	1.79014e+07	1.51457e+07	1.59167e+07	1.49462e+07	1.6188e+07	1.4928e+07	1.55936e+07
Lichesterol	2.67	level2			397.347	339.4	POS	5.98868e+06	6.57778e+06	6.2894e+06	9.57403e+06	8.37633e+06	6.27432e+06	6.67323e+06	7.55985e+06	5.59399e+06	8.33047e+06	8.30191e+06	6.33334e+06	5.8139e+06	5.45615e+06	6.07644e+06	4.94424e+06	5.80336e+06	4.82288e+06	7.22819e+06	7.04644e+06	6.79501e+06	5.9777e+06	7.33791e+06	7.77304e+06	5.86679e+06	7.70387e+06	7.31651e+06	9.0091e+06
Antheraxanthin	2.67	level2			584.422	310.5	POS	2.46787e+07	2.59431e+07	2.96176e+07	3.43614e+07	2.78991e+07	2.70052e+07	2.22176e+07	3.52845e+07	2.36369e+07	2.53705e+07	2.19766e+07	2.42772e+07	1.64388e+07	1.78967e+07	1.63269e+07	2.77034e+07	2.18216e+07	2.38913e+07	2.64487e+07	1.85052e+07	2.15947e+07	2.09036e+07	2.31433e+07	2.1363e+07	2.9221e+07	2.59398e+07	2.90692e+07	2.46904e+07
(-)-Curcumol	2.67	level2			237.185	219	POS	4.33604e+07	4.33088e+07	5.78764e+07	4.34653e+07	3.75416e+07	5.22098e+07	3.7749e+07	5.65061e+07	6.66279e+07	4.57669e+07	5.58398e+07	7.1877e+07	4.03499e+07	2.7876e+07	4.2902e+07	3.93046e+07	2.47151e+07	3.8797e+07	4.94753e+07	4.94099e+07	5.26178e+07	6.24058e+07	6.11528e+07	5.09201e+07	5.21075e+07	5.58806e+07	5.34559e+07	5.12361e+07
Rhodojaponin III	2.67	level2			391.212	205.9	POS	3.92706e+06	3.29694e+06	499993	2.75142e+06	2.22986e+06	3.5158e+06	653947	2.45946e+06	597728	2.47033e+06	2.90884e+06	2.53323e+06	1.45231e+07	1.29726e+07	1.5899e+07	1.73736e+07	1.35186e+07	1.94016e+07	3.92077e+06	8.97964e+06	4.87267e+06	7.0856e+06	6.78388e+06	2.55386e+06	7.27015e+06	1.60162e+07	5.97157e+06	1.05742e+07
(2R,3S,4S,5R,6R)-5-[(2S,3R,4R)-3,4-dihydroxy-4-(hydroxymethyl)oxolan-2-yl]oxy-2-(hydroxymethyl)-6-(2-phenylethoxy)oxane-3,4-diol	2.67	level2			415.162	186.4	NEG	3.08928e+09	3.08326e+09	1.51697e+09	1.72179e+09	1.75697e+09	2.85308e+09	2.77907e+09	1.84497e+09	2.81209e+09	1.55278e+09	1.47069e+09	1.214e+09	1.09982e+09	8.40977e+08	1.75822e+09	1.06876e+09	8.27355e+08	8.8337e+08	2.16231e+09	2.32291e+09	1.10689e+09	2.47809e+09	1.19687e+09	2.23738e+09	2.47781e+09	1.33431e+09	1.32538e+09	2.4895e+09
8-Nonynoic_acid	2.67	level2			155.107	165.6	POS	1.36326e+07	1.13625e+07	1.24456e+07	1.38515e+07	1.39118e+07	1.2041e+07	1.18214e+07	1.18214e+07	1.10752e+07	1.00487e+07	1.15296e+07	1.17513e+07	2.74668e+07	8.52489e+06	1.15252e+07	8.44188e+06	9.12585e+06	2.95139e+07	1.45245e+07	1.19196e+07	1.31114e+07	1.2254e+07	1.41633e+07	1.20872e+07	1.38022e+07	1.19561e+07	1.03985e+07	1.07109e+07
PC(36:5)	2.67	level2			780.554	350	POS	1.06483e+06	772188	724202	462148	730716	862206	656256	491205	657115	481638	426121	630905	861998	1.61838e+06	1.13973e+06	774998	1.44675e+06	927032	1.6474e+06	2.0837e+06	661176	2.29095e+06	473487	1.04153e+06	1.05106e+06	969449	866771	725252
Daidzin	2.66	level2			417.118	192	POS	4.51215e+06	4.07312e+06	6.0958e+06	3.27111e+06	4.37199e+06	2.41032e+06	1.4308e+07	7.61445e+06	1.76657e+07	9.06357e+06	1.20594e+07	1.06761e+07	1.62882e+06	2.67801e+06	3.34587e+06	456973	1.62134e+06	1.90639e+06	4.04185e+06	4.70979e+06	3.86639e+06	3.93326e+06	4.68451e+06	4.11884e+06	5.32265e+06	5.4231e+06	5.36859e+06	6.29239e+06
4-(Butoxymethyl)phenol	2.66	level2			181.122	178.1	POS	3.77134e+07	3.67821e+07	3.77778e+07	1.02775e+07	3.82076e+07	2.70142e+07	4.07312e+07	4.20612e+07	4.18327e+07	3.86939e+07	4.26839e+07	6.79933e+06	2.74429e+07	2.768e+07	3.23867e+07	3.13737e+07	1.36237e+07	1.48266e+07	3.45125e+07	3.89018e+07	4.04507e+07	3.95852e+07	7.36211e+07	3.85556e+07	3.66594e+07	3.6967e+07	3.70232e+07	3.66711e+07
(E)-9-(1,3-benzodioxol-5-yl)-1-piperidin-1-ylnon-8-en-1-one [IIN-based on	2.66	level2			382.176	169.5	POS	2.68719e+07	2.81848e+07	1.99641e+07	2.2537e+07	1.77724e+07	2.11082e+07	2.02029e+07	2.5559e+07	2.92933e+07	2.27119e+07	1.46389e+07	1.83303e+07	1.36412e+08	8.67801e+07	1.02013e+08	1.83508e+08	1.14737e+08	1.06622e+08	2.82315e+07	4.75118e+07	2.83734e+07	5.88497e+07	3.87582e+07	1.8089e+07	4.38949e+07	6.26356e+07	6.15171e+07	4.64323e+07
5-nonadecylbenzene-1,3-diol	2.66	level2			415.296	146.6	POS	1.84998e+06	3.68482e+06	3.1639e+06	2.92865e+06	3.36805e+06	2.09161e+06	4.3911e+06	4.61491e+06	1.94705e+07	3.01037e+06	3.2386e+06	3.73868e+06	712225	746577	1.44209e+06	1.27259e+06	704096	1.8235e+06	2.11812e+06	1.75122e+06	3.37389e+06	1.52975e+06	2.84179e+06	4.56928e+06	2.54912e+06	2.03954e+06	2.05229e+06	2.91078e+06
Methyl Heptadecanoic acid	2.66	level2			283.264	354.2	NEG	1.02481e+08	1.15327e+08	1.17412e+08	1.14964e+08	1.03958e+08	1.16574e+08	1.04496e+08	1.21443e+08	1.00739e+08	1.21494e+08	1.25622e+08	1.09341e+08	1.05203e+08	8.79007e+07	1.00053e+08	9.34457e+07	8.98954e+07	9.14058e+07	8.76684e+07	9.86942e+07	9.73474e+07	9.04132e+07	9.79368e+07	9.57796e+07	9.54456e+07	1.11061e+08	1.11668e+08	1.11862e+08
Siphonaxanthin	2.66	level2			601.425	301.6	POS	1.38182e+07	1.78114e+07	2.35846e+07	7.96635e+07	1.89962e+07	3.79586e+07	3.04667e+07	1.65298e+07	3.38322e+07	1.30711e+07	3.89828e+07	1.05359e+07	1.88114e+07	3.54633e+07	4.01174e+07	1.89278e+07	1.48882e+07	1.5714e+07	1.48866e+07	4.11288e+07	1.67959e+07	3.90676e+07	3.07515e+07	1.92194e+07	1.68723e+07	2.84312e+07	1.72665e+07	4.11027e+07
7,10,13-hexadecatrienoic_acid_/_Roughanic_acid	2.66	level2			251.2	275	POS	1.08485e+07	1.10132e+07	1.08342e+07	9.95088e+06	1.0422e+07	1.01603e+07	1.27475e+07	1.35228e+07	1.09584e+07	1.24518e+07	1.36238e+07	1.22514e+07	1.16213e+07	9.38348e+06	1.02823e+07	1.06554e+07	1.02832e+07	9.06123e+06	1.06184e+07	9.62772e+06	1.12139e+07	1.11592e+07	1.13771e+07	1.20672e+07	1.00561e+07	1.16534e+07	1.15421e+07	1.17799e+07
(2S,3R,4S,5R)-2-[(2R,3R,4S,5S,6R)-4,5-dihydroxy-6-(hydroxymethyl)-2-(2-phenylethoxy)oxan-3-yl]oxyoxane-3,4,5-triol	2.66	level2			415.162	212.8	NEG	1.71289e+08	1.78498e+08	1.48224e+08	1.74032e+08	1.68151e+08	1.57195e+08	1.68275e+08	1.9669e+08	1.69074e+08	1.62069e+08	1.64826e+08	1.34091e+08	9.45858e+07	9.53224e+07	1.02992e+08	1.0595e+08	7.80883e+07	9.15736e+07	1.24453e+08	1.38591e+08	1.37132e+08	1.45361e+08	1.47596e+08	1.38361e+08	1.45721e+08	1.41106e+08	1.42037e+08	1.47462e+08
[2-[(2S,3R,4S,5S,6R)-3,4,5-trihydroxy-6-(hydroxymethyl)oxan-2-yl]oxyphenyl]methyl 2-hydroxy-6-[(2S,3R,4S,5S,6R)-3,4,5-trihydroxy-6-(hydroxymethyl)oxan-2-yl]oxybenzoate	2.66	level2			583.167	154.7	NEG	8.35843e+06	9.34919e+06	1.08183e+07	1.10952e+07	9.99757e+06	1.01931e+07	1.25081e+07	1.21111e+07	1.45926e+07	1.06211e+07	1.38065e+07	9.72431e+06	6.64318e+06	8.50001e+06	1.1578e+07	7.92062e+06	5.19023e+06	9.5247e+06	7.53192e+06	9.65261e+06	9.07015e+06	8.15977e+06	7.45653e+06	7.79199e+06	1.02642e+07	1.06772e+07	9.48842e+06	1.06623e+07
2-Hydroxy-6-[(8Z,11Z)-8,11,14-pentadecatrien-1-yl]benzoic_acid	2.66	level2			365.207	154.3	POS	9.42684e+06	6.21786e+06	5.78398e+06	6.40174e+06	8.42479e+06	7.21885e+06	8.50995e+06	5.11672e+06	9.32662e+06	6.18578e+06	8.97658e+06	4.1174e+06	8.63876e+06	5.99812e+06	7.66764e+06	8.72745e+06	7.76405e+06	9.74925e+06	9.92222e+06	1.07312e+07	1.08775e+07	1.42661e+07	1.17043e+07	1.11633e+07	8.33871e+06	9.11271e+06	8.68573e+06	8.32988e+06
2,3,5,7-tetramethoxy-9,10-dihydrophenanthrene [IIN-based on	2.66	level2			323.124	42.5	POS	1.89564e+07	1.27101e+07	5.19462e+06	8.73491e+06	7.4811e+06	1.55199e+07	1.49871e+07	9.72883e+06	1.57251e+07	8.96176e+06	6.59851e+06	8.52015e+06	7.59024e+07	6.10994e+07	7.75714e+07	8.50375e+07	4.9268e+07	7.12298e+07	2.9252e+07	2.60463e+07	2.78855e+07	4.06145e+07	3.58436e+07	1.77871e+07	3.03405e+07	3.31102e+07	3.20534e+07	3.2123e+07
Ergocalciferol (Vitamin D2)	2.66	level2			397.347	315.5	POS	2.86316e+07	3.57511e+07	1.76063e+07	8.50193e+06	1.246e+07	2.54121e+07	1.8061e+07	1.39181e+07	2.44525e+07	1.06183e+07	1.2467e+07	3.29395e+07	1.50881e+07	1.66635e+07	2.43587e+07	1.28946e+07	2.74748e+07	1.99311e+07	1.79901e+07	1.75273e+07	3.47029e+07	3.97722e+07	1.57486e+07	1.88552e+07	1.99777e+07	1.07552e+07	9.84389e+06	1.26231e+07
Avasimibe	2.66	level2			500.286	309.1	NEG	1.75995e+06	1.99315e+06	2.19669e+06	2.02121e+06	1.41757e+06	1.77166e+06	2.22303e+06	2.3601e+06	2.53725e+06	2.06432e+06	2.18483e+06	2.39785e+06	2.24833e+06	2.42278e+06	2.43056e+06	2.10845e+06	1.93521e+06	1.24492e+06	2.30666e+06	2.72597e+06	3.38456e+06	2.84988e+06	2.89628e+06	2.27543e+06	1.7769e+06	1.70277e+06	2.28635e+06	2.04627e+06
8-Aminooctanoic acid	2.66	level2			142.123	301.6	POS	6.76043e+06	7.00551e+06	5.53123e+06	1.2677e+07	1.17639e+07	9.81092e+06	8.39254e+06	5.47372e+06	5.05407e+06	5.48328e+06	6.11307e+06	5.38481e+06	1.11231e+07	6.07132e+06	4.45996e+06	5.70806e+06	8.71626e+06	7.72553e+06	6.46687e+06	1.03185e+07	5.0803e+06	5.19588e+06	1.39864e+07	8.64829e+06	7.75864e+06	8.4292e+06	8.04311e+06	8.09899e+06
2-Oxoadipic acid	2.66	level2			141.019	16.9	NEG	7.54906e+06	6.58466e+06	6.15812e+06	8.52719e+06	8.2149e+06	7.43987e+06	7.21121e+06	7.28653e+06	6.86681e+06	6.56571e+06	7.0772e+06	6.33673e+06	4.50807e+06	6.26161e+06	8.10931e+06	6.82318e+06	6.69809e+06	7.97653e+06	7.89446e+06	6.16651e+06	8.18242e+06	6.97969e+06	8.01222e+06	7.30884e+06	7.53744e+06	7.42565e+06	6.42017e+06	5.42325e+06
Heptenoylcarnitine	2.66	level2			272.186	173.6	POS	1.17755e+07	8.40908e+06	1.04459e+07	8.66555e+06	1.01398e+07	1.25386e+07	1.5195e+07	1.42974e+07	1.21563e+07	1.24386e+07	1.6327e+07	1.28699e+07	5.16497e+06	4.7849e+06	5.16108e+06	5.63709e+06	5.03533e+06	4.99673e+06	8.3734e+06	7.07014e+06	5.56756e+06	9.14566e+06	9.0972e+06	7.85629e+06	7.80113e+06	7.98053e+06	7.42023e+06	1.02164e+07
Sph(d18:2)	2.66	level2			298.274	254	POS	9.31364e+07	1.12115e+08	1.12382e+08	9.90722e+07	8.73902e+07	1.15963e+08	7.10217e+07	9.88838e+07	7.79845e+07	8.52695e+07	8.25018e+07	1.05329e+08	1.37693e+08	1.29084e+08	1.13597e+08	1.3509e+08	1.178e+08	1.11386e+08	1.29491e+08	1.73914e+08	1.70592e+08	1.29878e+08	1.33335e+08	1.5398e+08	1.16436e+08	1.16988e+08	1.17459e+08	1.19012e+08
Decenedioylcarnitine	2.66	level2			344.208	182.1	POS	2.36448e+07	3.03763e+07	2.83147e+07	2.79933e+07	2.6716e+07	2.27728e+07	2.58155e+07	3.65172e+07	2.40968e+07	3.37735e+07	3.06433e+07	1.76138e+07	3.47182e+07	2.47024e+07	2.68225e+07	3.31438e+07	2.75296e+07	2.81366e+07	2.34718e+07	3.12762e+07	2.64928e+07	2.46696e+07	2.80034e+07	3.06049e+07	2.78391e+07	2.83527e+07	2.9187e+07	2.82306e+07
(2E,4E,12Z)-N-(2-methylpropyl)octadeca-2,4,12-trienamide	2.65	level2			334.31	326.9	POS	648753	1.2331e+06	2.67106e+06	2.38536e+06	2.4243e+06	2.32779e+06	2.90814e+06	3.6941e+06	1.73904e+06	3.90917e+06	3.81322e+06	2.06263e+06	801527	0	0	688711	0	0	1.58889e+06	3.05067e+06	2.15575e+06	1.40814e+06	2.41347e+06	3.23863e+06	1.81243e+06	2.91717e+06	2.55062e+06	2.79881e+06
2-Hexyl-3-phenyl-2-propenal	2.65	level2			217.158	218.4	POS	2.09671e+07	2.2789e+07	1.41793e+07	1.24864e+07	2.06442e+07	2.14636e+07	2.64286e+07	2.48272e+07	2.38357e+07	2.21453e+07	2.64893e+07	5.49003e+07	1.52391e+07	2.02534e+07	1.75975e+07	1.50174e+07	1.76506e+07	1.67135e+07	2.4967e+07	2.0599e+07	2.15327e+07	2.06192e+07	2.33756e+07	2.28113e+07	2.05284e+07	2.16699e+07	2.24824e+07	2.256e+07
7-methoxy-2-methyl-3-phenyl-4H-chromen-4-one	2.65	level2			289.082	138.4	POS	1.61575e+07	1.39832e+07	1.99873e+07	1.72075e+07	1.61134e+07	1.34206e+07	1.44569e+07	1.95236e+07	1.32325e+07	1.21411e+07	1.28558e+07	1.74917e+07	1.10923e+07	1.0439e+07	8.54603e+06	1.19137e+07	1.35585e+07	7.43338e+06	9.92403e+06	1.03102e+07	3.51591e+06	1.24964e+07	9.84922e+06	9.80775e+06	1.68466e+07	1.14093e+07	1.23821e+07	1.19781e+07
PHENYLETHANOLAMINE	2.65	level2			120.081	42.5	POS	1.19586e+09	1.31781e+09	1.10601e+09	1.2505e+09	1.42252e+09	1.08808e+09	7.02313e+08	9.45955e+08	7.1978e+08	1.06327e+09	7.50447e+08	6.67036e+08	1.65191e+09	1.38364e+09	1.26844e+09	1.70652e+09	1.55579e+09	1.65462e+09	1.00309e+09	1.3233e+09	1.13319e+09	1.00334e+09	7.79761e+08	1.31688e+09	1.16008e+09	1.2036e+09	1.24004e+09	1.11197e+09
beta-Cyano-alanine	2.65	level2			113.036	23.6	NEG	2.58906e+06	5.40545e+06	1.65082e+06	3.31078e+06	4.82072e+06	1.35706e+06	2.35567e+06	2.34337e+06	1.40408e+06	2.58185e+06	1.87581e+06	1.03475e+06	2.05934e+07	1.38281e+07	9.21035e+06	2.41352e+07	1.71531e+07	2.15498e+07	2.4132e+06	4.51967e+06	4.06332e+06	2.87114e+06	2.22006e+06	7.19485e+06	6.73692e+06	6.94483e+06	6.7212e+06	6.47074e+06
7-(2-hydroxypropan-2-yl)-1,4a-dimethyl-2,3,4,5,6,7,8,8a-octahydronaphthalen-1-ol	2.65	level2			239.202	309.1	NEG	1.12649e+08	1.2373e+08	1.25171e+08	1.31675e+08	1.27836e+08	1.28173e+08	1.42681e+08	1.39483e+08	1.28933e+08	1.44898e+08	1.40621e+08	1.40328e+08	1.33414e+08	1.1817e+08	1.27193e+08	1.15263e+08	1.26887e+08	1.10558e+08	1.30681e+08	1.28726e+08	1.44211e+08	1.38245e+08	1.30191e+08	1.57701e+08	1.22271e+08	1.36162e+08	1.34959e+08	1.32232e+08
Cepharanthine	2.65	level2			629.26	293	POS	1.69174e+07	1.51574e+07	1.19793e+07	9.39792e+06	8.21671e+06	1.34885e+07	5.45753e+06	8.33551e+06	8.61027e+06	1.20659e+07	8.56072e+06	2.05812e+07	2.08512e+07	2.01061e+07	2.55703e+07	1.56454e+07	2.22756e+07	1.50876e+07	9.24817e+06	1.84241e+07	1.9582e+07	1.25189e+07	2.30169e+07	1.4012e+07	1.33097e+07	1.62044e+07	1.59091e+07	1.60085e+07
(1S,2R,4S,9R,10R,14S,15S,17S)-9-(3-Furyl)-1-hydroxy-15-(2-methoxy-2-oxoethyl)-10,14,16,16-tetramethyl-7,18-dioxo-3,8-dioxapentacyclo[12.3.1.0.2,4..0.4,13..0.5,10.]octadec-17-yl 2-methylpropanoate	2.65	level2			595.255	286.2	POS	2.69411e+06	2.36991e+06	2.27292e+06	2.02159e+06	2.19127e+06	3.49406e+06	1.13617e+06	1.14808e+06	1.57879e+06	1.41937e+06	1.71853e+06	2.09512e+06	1.16174e+06	950039	1.60413e+06	1.76407e+06	1.20792e+06	650898	1.45011e+06	2.24505e+06	5.33361e+06	2.51187e+06	3.54336e+06	1.62052e+06	1.8876e+06	2.17322e+06	2.09381e+06	2.03517e+06
taccalonolide A	2.65	level2			703.293	272.4	POS	5.74613e+06	6.04704e+06	6.78189e+06	6.15539e+06	7.21915e+06	6.07423e+06	6.50914e+06	6.92712e+06	5.76638e+06	6.8754e+06	7.0266e+06	6.47705e+06	5.37901e+06	5.82317e+06	6.47898e+06	4.98802e+06	1.23446e+07	4.79154e+06	5.27593e+06	5.87073e+06	6.26435e+06	5.15696e+06	5.72653e+06	6.35208e+06	5.62049e+06	6.90012e+06	6.76529e+06	5.77772e+06
FA 18:4+1O	2.65	level2			293.211	270.3	POS	2.59649e+07	2.96241e+07	2.42098e+07	2.85003e+07	2.86288e+07	2.58137e+07	3.02141e+07	2.78509e+07	2.58115e+07	6.35632e+07	2.46446e+07	2.38516e+07	2.40142e+07	2.72951e+07	2.63815e+07	2.51938e+07	9.11146e+07	2.68988e+07	7.33718e+07	2.44221e+07	2.17033e+07	2.29924e+07	2.47937e+07	2.66694e+07	2.40464e+07	2.54483e+07	2.58554e+07	2.65727e+07
(+)-Costunolide	2.65	level2			233.154	215.8	POS	1.8827e+07	1.82809e+07	3.15896e+07	2.07963e+07	2.19957e+07	1.75913e+07	2.61215e+07	2.74883e+07	3.84684e+07	2.57481e+07	2.31271e+07	2.65017e+07	1.28842e+07	1.73885e+07	1.46795e+07	1.1926e+07	1.62305e+07	1.24443e+07	1.88381e+07	1.83226e+07	1.98525e+07	1.86503e+07	2.24587e+07	2.36822e+07	2.16714e+07	2.05329e+07	2.04406e+07	1.9384e+07
daniellic acid	2.65	level2			317.211	215.2	POS	4.61719e+07	3.69876e+07	3.99215e+07	3.41148e+07	3.57498e+07	4.27853e+07	4.92026e+07	5.4809e+07	3.90816e+07	4.36179e+07	5.28254e+07	4.71434e+07	3.25067e+07	2.41442e+07	2.85725e+07	3.16006e+07	2.98665e+07	2.53844e+07	3.56081e+07	3.49629e+07	3.7046e+07	3.39255e+07	4.61443e+07	3.65614e+07	3.92052e+07	3.54092e+07	3.60671e+07	3.94949e+07
methyl chlorogenate	2.65	level2			367.106	185.7	NEG	8.07997e+06	8.1903e+06	9.17861e+06	7.95046e+06	9.34387e+06	7.33043e+06	7.06086e+06	9.5021e+06	6.48134e+06	8.42562e+06	8.09564e+06	7.55551e+06	1.12134e+07	8.81686e+06	9.18556e+06	1.09078e+07	8.67943e+06	9.26761e+06	9.87686e+06	1.25994e+07	1.222e+07	1.09578e+07	1.04468e+07	1.15379e+07	9.2906e+06	1.00273e+07	9.37084e+06	8.78682e+06
Salannin	2.65	level2			597.302	143.1	POS	235831	277215	393406	180497	196775	365113	364826	324709	561920	498804	329722	261052	0	96257.2	60452.5	58462.6	70526.3	118296	461542	513987	588823	452328	359515	429312	363726	315382	590512	261303
(2R,3S,4S,5R,6R)-5-[(2S,3R,4R)-3,4-dihydroxy-4-(hydroxymethyl)oxolan-2-yl]oxy-2-(hydroxymethyl)-6-[2-(4-hydroxyphenyl)ethoxy]oxane-3,4-diol	2.65	level2			431.156	77.6	NEG	5.05081e+06	4.30958e+06	2.7763e+06	1.52952e+06	2.20189e+06	3.50912e+06	3.44351e+06	2.38724e+06	4.73868e+06	1.4299e+06	2.26453e+06	347294	0	670769	131788	331269	0	0	3.25123e+06	4.17751e+06	4.04703e+06	2.51781e+06	2.05671e+06	978357	2.14956e+06	1.54715e+06	1.74803e+06	2.6614e+06
2-Methyl-3-hydroxybutyric acid	2.65	level2			101.06	10.9	POS	5.30523e+06	4.0072e+06	4.10086e+06	4.1857e+06	4.04849e+06	4.47413e+06	4.3078e+06	4.55528e+06	4.70455e+06	7.66584e+06	4.28739e+06	4.93793e+06	4.5785e+06	4.25749e+06	5.06104e+06	5.40484e+06	4.7084e+06	8.98193e+06	4.61655e+06	4.59634e+06	9.10807e+06	4.40007e+06	8.99943e+06	4.33641e+06	9.54157e+06	4.81499e+06	8.45208e+06	4.13043e+06
Ginkgotoxin	2.64	level2			184.097	350.6	POS	1.18149e+06	1.31811e+06	1.62848e+06	1.83026e+06	1.94679e+06	756650	1.70933e+06	1.44093e+06	734158	1.76022e+06	1.7646e+06	1.23411e+06	1.37368e+06	1.71136e+06	1.2362e+06	1.40754e+06	1.07048e+06	1.67031e+06	1.7889e+06	1.34705e+06	1.58673e+06	1.41459e+06	1.73848e+06	1.50837e+06	1.67667e+06	1.82266e+06	1.50683e+06	1.71096e+06
Myristoleate	2.64	level2			225.186	298.6	NEG	1.26622e+07	1.54365e+07	1.59089e+07	1.57193e+07	1.55731e+07	1.42721e+07	1.4118e+07	1.44169e+07	1.63674e+07	1.72124e+07	1.19865e+07	1.55605e+07	1.87525e+07	1.77923e+07	1.73983e+07	1.39669e+07	1.92805e+07	1.6716e+07	1.29565e+07	1.38393e+07	1.42196e+07	1.38183e+07	1.52933e+07	1.67114e+07	1.35429e+07	1.47879e+07	1.49567e+07	1.61659e+07
Phytocassane_E	2.64	level2			317.211	281.2	POS	6.34611e+07	1.60767e+07	4.92021e+07	5.67642e+07	1.63268e+07	5.77243e+07	6.06684e+07	1.77952e+07	4.73655e+07	7.16049e+07	6.45596e+07	6.78213e+07	1.98541e+07	1.82319e+07	5.23681e+07	1.67456e+07	1.86807e+07	1.61118e+07	1.96006e+07	5.37375e+07	1.97935e+07	5.132e+07	6.537e+07	1.88427e+07	1.66799e+07	5.291e+07	5.78548e+07	5.62607e+07
Sterebin_C	2.64	level2			353.232	228.9	POS	5.26373e+07	4.16501e+07	5.30602e+07	4.50533e+07	4.8829e+07	5.56862e+07	5.89633e+07	6.00113e+07	5.01186e+07	5.72601e+07	5.92121e+07	5.87842e+07	4.04889e+07	3.4177e+07	3.53415e+07	3.35755e+07	3.70063e+07	3.23529e+07	4.00517e+07	4.51961e+07	3.89174e+07	4.14067e+07	4.77944e+07	4.72768e+07	4.59439e+07	4.88554e+07	4.70345e+07	4.87596e+07
Siderone	2.64	level2			303.232	184	POS	1.20871e+07	1.29253e+07	1.2679e+07	1.08754e+07	1.08545e+07	1.36709e+07	5.98497e+06	1.50366e+07	1.299e+07	1.28464e+07	1.41439e+07	1.42875e+07	9.99127e+06	1.01621e+07	2.7095e+07	1.35137e+07	1.04263e+07	1.05371e+07	1.08165e+07	1.33402e+07	1.7421e+07	1.16193e+07	1.51677e+07	1.50233e+07	1.1403e+07	1.84868e+07	1.17859e+07	1.33598e+07
(3aS,8aR)-1,3a,8-trimethyl-1,2,3,3a,8,8a-hexahydropyrrolo[2,3-b]indol-5-yl methylcarbamate	2.64	level2			276.17	152.4	POS	3.10122e+06	2.75096e+06	2.63805e+06	3.237e+06	2.66698e+06	3.38868e+06	3.52899e+06	4.33037e+06	4.44967e+06	3.12302e+06	3.34005e+06	2.6308e+06	0	447585	0	0	0	520458	3.42744e+06	3.22492e+06	3.99696e+06	3.97313e+06	2.71931e+06	3.03346e+06	3.27062e+06	2.9556e+06	2.42281e+06	2.51439e+06
Cycloart-25-ene-3,24-diol	2.64	level2			425.377	330.2	POS	2.29354e+07	2.37597e+07	1.63344e+07	3.22885e+07	2.82081e+07	2.32824e+07	3.40184e+07	2.81655e+07	3.6541e+07	3.689e+07	3.39504e+07	2.4949e+07	2.62879e+07	2.64824e+07	2.87677e+07	2.59963e+07	2.16421e+07	2.4362e+07	3.82257e+07	3.10835e+07	3.2849e+07	3.71268e+07	3.73881e+07	4.5526e+07	2.65652e+07	3.98372e+07	3.66434e+07	3.91374e+07
(1S,2S,3aR,4S,5S,6E,9R,11R,12E,13aS)-4,9,11-Triacetoxy-3a-hydroxy-2,5,8,8,12-pentamethyl-2,3,3a,4,5,8,9,10,11,13a-decahydro-1H-cyclopenta[12]annulen-1-yl benzoate	2.64	level2			607.29	311.5	POS	1.51686e+09	1.57259e+09	1.41656e+09	1.43094e+09	1.44084e+09	1.58594e+09	7.41703e+08	1.00829e+09	9.54096e+08	9.88244e+08	1.00293e+09	1.19741e+09	1.46434e+09	1.35352e+09	1.61347e+09	1.44943e+09	1.49405e+09	1.25208e+09	1.32451e+09	2.00149e+09	1.99272e+09	1.58792e+09	2.1241e+09	1.52616e+09	1.42651e+09	1.58227e+09	1.6051e+09	1.56524e+09
5-undecylbenzene-1,3-diol	2.64	level2			263.201	298.6	NEG	4.96554e+08	4.93655e+08	3.28808e+08	4.83504e+08	4.95145e+08	4.70492e+08	3.72954e+08	2.8138e+08	4.72973e+08	2.9895e+08	2.47293e+08	2.63642e+08	4.82889e+08	4.39558e+08	4.71102e+08	3.90998e+08	3.70924e+08	3.88093e+08	5.71303e+08	6.06184e+08	6.49825e+08	6.71337e+08	5.23696e+08	4.39594e+08	4.2938e+08	4.5187e+08	4.70937e+08	4.65348e+08
FA 18:5+2O	2.64	level2			305.176	251.7	NEG	3.09557e+07	2.78153e+07	2.51433e+07	2.90326e+07	3.12607e+07	3.30612e+07	2.33373e+07	2.55217e+07	2.23895e+07	2.61949e+07	2.57601e+07	2.38887e+07	2.23778e+07	2.37868e+07	2.69765e+07	2.47997e+07	2.23628e+07	1.92646e+07	2.07718e+07	2.4954e+07	2.51546e+07	2.37519e+07	2.64336e+07	2.2137e+07	2.68788e+07	2.7531e+07	2.86306e+07	2.64814e+07
(1R,2E,7R,10E,12S,13S,15R)-12,15-dihydroxy-7-methyl-8-oxabicyclo[11.3.0]hexadeca-2,10-dien-9-one	2.64	level2			279.161	243.8	NEG	9.47136e+06	1.01121e+07	1.22123e+07	1.47655e+07	1.49736e+07	1.60851e+07	1.09977e+07	1.46151e+07	1.33717e+07	1.81747e+07	1.60547e+07	1.23575e+07	3.7598e+07	3.20863e+07	2.88622e+07	3.8896e+07	2.42388e+07	2.54961e+07	2.92897e+07	3.16529e+07	1.35237e+07	1.07067e+07	3.55112e+07	4.77206e+07	1.11812e+07	1.70445e+07	1.04381e+07	1.66448e+07
Ilexsaponin A1	2.64	level2			687.367	219.1	POS	0	0	0	0	0	0	0	0	0	0	0	0	70276.1	284275	268246	165008	154934	331090	1.45126e+06	1.10574e+06	1.52933e+06	1.12464e+06	873188	1.12441e+06	110649	294474	0	0
Eupacunolin	2.64	level2			421.187	182.1	POS	1.6209e+06	1.45105e+06	1.11151e+06	978849	373215	895688	289409	326129	647086	963524	466036	400700	1.22202e+07	7.14723e+06	8.09096e+06	1.06937e+07	8.66456e+06	7.85602e+06	2.21017e+06	2.74198e+06	2.08653e+06	2.79973e+06	3.19143e+06	980859	3.11596e+06	3.39673e+06	3.49347e+06	2.9879e+06
1,4-dihydroxy-6,6,9a-trimethyl-4,5,5a,7,8,9-hexahydro-1H-benzo[e][2]benzofuran-3-one	2.64	level2			305.113	61	POS	8.00134e+06	6.13422e+06	4.47842e+06	5.18843e+06	5.40102e+06	8.41087e+06	7.04237e+06	5.92764e+06	8.40256e+06	5.74854e+06	5.69419e+06	4.95792e+06	4.19619e+07	3.01095e+07	3.87209e+07	3.9493e+07	3.13325e+07	3.48196e+07	1.01296e+07	1.44055e+07	1.01468e+07	1.83137e+07	1.39178e+07	7.72686e+06	1.38733e+07	8.85979e+06	1.33826e+07	1.57481e+07
Deoxypumiloside	2.64	level2			497.192	47.4	POS	2.99901e+06	7.63912e+06	3.95987e+06	4.81931e+06	1.16081e+06	1.69312e+06	2.66971e+06	3.49963e+06	5.83557e+06	3.75996e+06	4.61312e+06	2.86433e+06	547572	130772	338587	296798	0	473951	456478	596034	550917	684500	783031	5.03224e+06	1.91079e+06	1.35552e+06	1.47812e+06	2.02521e+06
Corylin	2.64	level2			321.108	46.7	POS	1.11807e+07	1.42008e+07	6.59915e+06	8.34639e+06	2.53325e+06	7.77778e+06	3.10282e+06	5.73482e+06	3.80905e+06	5.06551e+06	1.31086e+06	3.45981e+06	6.76177e+07	7.23851e+07	6.70986e+07	7.12884e+07	7.1604e+07	7.48182e+07	1.18377e+07	2.1352e+07	1.24118e+07	1.16177e+07	2.04031e+07	7.52221e+06	2.88443e+07	2.60253e+07	2.94018e+07	2.76122e+07
6,4'-Dimethoxyisoflavone-7-glucoside	2.64	level2			297.073	43.6	NEG	5.41576e+06	3.92437e+06	4.97368e+06	4.19598e+06	4.41487e+06	3.86467e+06	3.81858e+06	4.49183e+06	3.97058e+06	4.33772e+06	4.28111e+06	4.02512e+06	4.96454e+06	5.09599e+06	4.96704e+06	5.00206e+06	3.51226e+06	4.49488e+06	5.6769e+06	6.18219e+06	6.19812e+06	6.19035e+06	5.3151e+06	5.90037e+06	4.74946e+06	5.46072e+06	4.88042e+06	5.02191e+06
Hexadecadienoylcarnitine	2.64	level2			396.31	273.3	POS	6.93235e+06	7.72966e+06	1.0095e+07	8.47882e+06	6.25695e+06	7.0732e+06	1.26213e+07	1.51973e+07	1.49404e+07	1.12027e+07	1.33287e+07	1.3072e+07	6.22933e+06	6.34893e+06	5.97528e+06	6.44603e+06	5.09642e+06	5.61655e+06	8.85899e+06	8.22162e+06	1.23433e+07	1.01179e+07	1.07859e+07	1.02493e+07	8.4098e+06	8.88892e+06	9.55157e+06	9.62074e+06
Macamide_B	2.63	level2			346.311	343.3	POS	1.43534e+06	2.1007e+06	2.58848e+06	1.99539e+06	2.25395e+06	1.5406e+06	1.77568e+06	2.4615e+06	1.33666e+06	2.57298e+06	2.64868e+06	2.34603e+06	1.97507e+06	1.16393e+06	1.28204e+06	1.42479e+06	1.39137e+06	606267	1.66794e+06	2.00045e+06	1.7767e+06	1.47356e+06	1.92934e+06	2.11291e+06	1.70173e+06	2.10848e+06	1.81357e+06	2.02775e+06
2,4,6-trihydroxy-5-[1-(4-hydroxy-1,1,4,7-tetramethyl-1a,2,3,4a,5,6,7a,7b-octahydrocyclopropa[h]azulen-7-yl)-3-methylbutyl]benzene-1,3-dicarbaldehyde	2.63	level2			471.278	317.8	NEG	2.55081e+06	2.77266e+06	2.61544e+06	3.67712e+06	3.72216e+06	5.19858e+06	1.00749e+07	6.66598e+06	6.04349e+06	9.36499e+06	1.06949e+07	853021	4.04306e+06	5.57635e+06	2.25964e+06	3.30467e+06	6.69979e+06	5.31411e+06	7.41973e+06	5.96746e+06	1.12127e+06	5.53672e+06	7.13742e+06	6.51896e+06	5.17916e+06	6.36122e+06	7.3018e+06	805503
(ent-6alpha,7alpha,12alpha)-6,7,12-Trihydroxy-16-kauren-19-oic_acid	2.63	level2			351.216	225.7	POS	2.27007e+07	2.02214e+07	2.1381e+07	2.00335e+07	2.13126e+07	2.3225e+07	2.61008e+07	2.73483e+07	2.27787e+07	2.60744e+07	2.82076e+07	2.65125e+07	1.94048e+07	1.84548e+07	1.91467e+07	2.86417e+07	3.49057e+07	2.91595e+07	1.99775e+07	2.01679e+07	2.01586e+07	1.90905e+07	4.49811e+07	2.15002e+07	2.34735e+07	2.24727e+07	2.45331e+07	2.33132e+07
Epigallocatechin	2.63	level2			307.083	213.8	POS	1.14915e+07	1.21471e+07	9.9353e+06	1.11791e+07	1.31566e+07	9.39904e+06	9.45775e+06	1.56105e+07	9.67654e+06	1.18044e+07	7.94763e+06	1.11722e+07	9.62039e+06	6.22514e+06	7.23194e+06	5.90109e+06	5.48196e+06	6.13734e+06	9.09299e+06	9.57271e+06	1.04129e+07	1.0474e+07	1.24248e+07	9.82669e+06	1.20246e+07	8.99093e+06	1.08404e+07	1.01116e+07
Methyl_N-methylanthranilate	2.63	level2			166.086	66.6	POS	3.62453e+07	9.36522e+07	3.10927e+07	4.22198e+07	5.71154e+07	3.13776e+07	1.42394e+07	2.83631e+07	1.67087e+07	2.60041e+07	1.67836e+07	1.42875e+07	1.63125e+08	4.80594e+07	3.24162e+07	7.68811e+07	4.44207e+07	4.90609e+07	3.51874e+07	9.85886e+07	4.11009e+07	3.6537e+07	2.15851e+07	3.67112e+07	4.07058e+07	3.8557e+07	3.72989e+07	3.74178e+07
L-NORVALINE	2.63	level2			116.072	49.8	NEG	1.3202e+07	4.66821e+06	1.5715e+07	7.4784e+06	1.46068e+07	8.55257e+06	1.05376e+07	1.16892e+07	6.43564e+06	1.5485e+07	9.01611e+06	5.81446e+06	7.54909e+06	6.20922e+06	4.05084e+06	5.72862e+06	7.19106e+06	1.01994e+07	3.38496e+06	4.40361e+06	3.87021e+06	5.07383e+06	2.0911e+06	1.3068e+07	1.4096e+07	8.74221e+06	8.72738e+06	1.01118e+07
1(4H)-Naphthalenone, 4a,5,6,7,8,8a-hexahydro-4-[(3R)-3-hydroxy-3-methyl-4-penten-1-yl]-3,4a,8,8-tetramethyl-, (4S,4aR,8aS)-	2.63	level2			287.236	277.6	POS	2.769e+08	2.66165e+08	2.81438e+08	2.71579e+08	2.848e+08	2.95035e+08	3.44758e+08	3.36524e+08	2.9087e+08	3.06922e+08	3.26701e+08	3.23725e+08	3.15494e+08	2.79922e+08	2.87485e+08	3.09527e+08	2.77755e+08	3.17957e+08	2.78763e+08	2.91771e+08	2.99116e+08	6.49839e+08	2.9593e+08	2.93116e+08	2.87068e+08	3.10692e+08	3.09927e+08	2.96435e+08
2-[(2'R,8R,8aS)-2',4,4,7,8a-pentamethylspiro[2,3,4a,5-tetrahydro-1H-naphthalene-8,5'-oxolane]-2'-yl]acetic acid	2.63	level2			321.242	275.6	POS	3.94586e+07	3.7474e+07	3.88309e+07	3.79847e+07	4.04784e+07	4.41774e+07	5.11029e+07	4.94647e+07	4.18637e+07	4.60806e+07	5.12447e+07	4.85681e+07	5.15976e+07	4.49326e+07	2.98578e+07	5.05806e+07	4.8421e+07	4.37948e+07	4.92419e+07	5.16273e+07	4.7836e+07	7.03788e+07	5.07052e+07	4.81586e+07	4.50952e+07	4.53059e+07	5.10785e+07	4.84691e+07
Topazolin_hydrate	2.63	level2			387.143	198.6	POS	2.0281e+07	1.97462e+07	2.45577e+07	2.26072e+07	2.16222e+07	2.10754e+07	2.82255e+07	2.72007e+07	2.88543e+07	2.27539e+07	2.96417e+07	2.30456e+07	2.1636e+07	1.78652e+07	2.22666e+07	2.23067e+07	2.07342e+07	2.09362e+07	1.8138e+07	2.48396e+07	1.80671e+07	1.74724e+07	1.60789e+07	1.66279e+07	1.94449e+07	2.07544e+07	2.15991e+07	2.16246e+07
2H-Naphtho[2,1-c]pyran-7-carboxylic acid, 2-(3-furanyl)-1,4,4a,5,6,6a,7,10,10a,10b-decahydro-7-hydroxy-6a,10b-dimethyl-4-oxo-, methyl ester, (2S,4aS,6aR,7R,10aR,10bR)-	2.63	level2			397.165	186.7	POS	4.06319e+06	3.72197e+06	4.50646e+06	4.81538e+06	4.41686e+06	3.93097e+06	5.92251e+06	4.92842e+06	6.05173e+06	4.41222e+06	5.72993e+06	5.019e+06	2.92611e+06	2.74155e+06	3.00585e+06	2.62471e+06	2.62357e+06	2.37012e+06	2.74217e+06	3.46541e+06	2.96207e+06	2.95203e+06	2.85806e+06	2.82312e+06	3.73162e+06	3.48289e+06	3.63645e+06	3.99526e+06
Praeruptorin B	2.63	level2			427.169	159.6	POS	904233	932977	1.12151e+06	798682	937553	670121	651604	936037	858090	609848	524318	634601	165300	164939	393227	458277	210846	530191	619678	763467	662104	686724	754880	751849	634037	692264	580480	985383
kuwanon G	2.63	level2			693.23	141.1	POS	4.87756e+06	5.24514e+06	5.79007e+06	5.14354e+06	4.88468e+06	4.36779e+06	7.69726e+06	7.67854e+06	8.96404e+06	4.92739e+06	6.60403e+06	4.59587e+06	967996	1.18245e+06	1.57527e+06	2.03218e+06	1.49143e+06	1.66772e+06	3.50979e+06	2.33825e+06	3.37581e+06	3.49274e+06	2.63858e+06	3.54139e+06	3.92581e+06	3.44829e+06	4.13647e+06	4.01235e+06
Geniposide	2.63	level2			389.146	70.2	POS	6.27047e+06	1.05288e+07	1.01702e+07	4.37428e+06	4.62309e+06	6.82681e+06	3.3381e+06	9.24364e+06	4.05044e+06	6.74281e+06	5.00309e+06	4.02261e+06	2.16513e+07	1.74074e+07	1.51041e+07	2.2927e+07	1.43556e+07	1.67994e+07	1.03638e+07	1.38336e+07	4.91346e+06	7.57704e+06	1.55728e+06	8.55066e+06	7.88107e+06	5.61032e+06	1.06726e+07	1.11172e+07
Byakangelicin	2.63	level2			335.11	58.4	POS	5.39005e+06	5.22683e+06	7.25098e+06	4.22257e+06	3.2046e+06	5.56224e+06	1.49805e+06	1.86488e+06	1.23212e+06	1.58165e+06	1.46677e+06	1.48106e+06	3.55177e+06	3.13781e+06	2.7852e+06	1.29799e+06	3.52821e+06	2.38451e+06	6.24066e+06	1.09802e+07	1.10596e+07	5.87252e+06	1.003e+07	6.04125e+06	3.01853e+06	4.09369e+06	4.47916e+06	4.73889e+06
Ergosterol (Provitamin D2)	2.63	level2			379.337	329.5	POS	1.23014e+07	1.3677e+07	1.15166e+07	1.15454e+07	9.89008e+06	1.16446e+07	8.59979e+06	9.38339e+06	9.62885e+06	8.87816e+06	1.07716e+07	1.38299e+07	2.127e+07	2.39702e+07	2.12028e+07	2.17801e+07	1.87439e+07	2.16177e+07	1.84255e+07	1.95028e+07	1.70094e+07	1.64841e+07	1.50044e+07	1.53592e+07	1.37794e+07	1.47045e+07	1.4078e+07	1.54875e+07
2,6-ditert-butyl-4-methylphenol	2.62	level2			221.19	213.4	POS	1.28715e+07	1.14207e+07	1.392e+07	1.2135e+07	1.19121e+07	1.28053e+07	1.18057e+07	1.39932e+07	1.1294e+07	1.23498e+07	1.21509e+07	2.02827e+07	1.33683e+07	1.53939e+07	9.65921e+06	9.39758e+06	1.09105e+07	9.54241e+06	2.02822e+07	1.95843e+07	1.21294e+07	1.57312e+07	1.56237e+07	2.20964e+07	1.14274e+07	2.09525e+07	1.16218e+07	2.50058e+07
Flavone base + 4O, 1Prenyl	2.62	level2			353.104	195.5	NEG	6.77384e+06	6.14392e+06	6.78519e+06	7.4203e+06	8.39426e+06	7.11567e+06	9.42208e+06	9.11757e+06	9.06494e+06	8.79763e+06	1.0649e+07	9.78627e+06	5.7628e+06	8.20361e+06	7.42821e+06	6.40118e+06	7.47743e+06	9.7889e+06	8.36728e+06	9.69731e+06	8.12549e+06	8.31196e+06	6.33957e+06	6.25494e+06	9.15007e+06	7.43397e+06	8.61147e+06	7.03348e+06
1,4-naphthalene-dione	2.62	level2			158.036	159.8	NEG	6.27455e+07	2.66911e+07	9.25863e+06	4.75252e+07	1.29654e+08	5.08795e+07	0	0	0	0	0	0	0	231472	0	0	0	0	595964	141353	0	0	0	0	1.22439e+07	1.21739e+07	1.16555e+07	1.19747e+07
Tanshinone IIA	2.62	level2			295.129	115.2	POS	1.15789e+08	1.0091e+08	6.94289e+07	1.27151e+08	1.88885e+08	1.13952e+08	2.31415e+07	4.69716e+07	2.78741e+07	7.04947e+07	3.65902e+07	3.83214e+07	1.84251e+08	1.24918e+08	1.52919e+08	2.338e+08	1.66131e+08	1.80207e+08	9.05902e+07	1.07332e+08	1.12421e+08	8.89883e+07	3.62136e+07	9.27623e+07	9.24183e+07	1.0769e+08	1.23253e+08	9.73101e+07
n-methylflindersine	2.62	level2			242.118	160.2	POS	7.52637e+06	8.17137e+06	8.56904e+06	9.44705e+06	1.10078e+07	7.73978e+06	3.94952e+06	6.65924e+06	4.47637e+06	6.53217e+06	6.15949e+06	5.47664e+06	5.46605e+06	5.19871e+06	5.16104e+06	8.35672e+06	5.78659e+06	6.58191e+06	5.39575e+06	6.06113e+06	5.19315e+06	5.1541e+06	3.93314e+06	7.23563e+06	7.07779e+06	7.02729e+06	6.76941e+06	6.85821e+06
Ranaconitine	2.62	level2			623.285	305.9	POS	1.5198e+08	1.50455e+08	1.46948e+08	1.4524e+08	1.51788e+08	1.38777e+08	9.94758e+07	1.48274e+08	1.11941e+08	1.28078e+08	1.28617e+08	1.21686e+08	1.39265e+08	1.00933e+08	1.15184e+08	1.11623e+08	9.84367e+07	8.20205e+07	1.14517e+08	1.35019e+08	1.20558e+08	1.43904e+08	1.31896e+08	1.31167e+08	1.25709e+08	1.33241e+08	1.34005e+08	1.34877e+08
Ajugasterone C	2.62	level2			481.307	259.2	POS	2.65022e+06	1.47925e+06	1.02598e+06	3.14339e+06	2.17349e+06	4.25381e+06	2.05978e+06	3.00187e+06	1.41141e+06	1.34236e+06	3.53078e+06	2.34282e+06	2.0438e+07	7.41233e+06	8.03536e+06	7.85806e+06	8.32399e+06	7.29226e+06	5.50205e+06	1.26285e+07	1.32846e+07	5.43489e+06	5.64397e+06	5.23515e+06	4.88621e+06	1.15145e+07	5.09467e+06	4.94251e+06
Solidagenone	2.62	level2			317.211	245.4	POS	5.60539e+07	7.74811e+07	7.68267e+07	7.72349e+07	4.82359e+07	9.07589e+07	5.92323e+07	5.74514e+07	7.54133e+07	9.28049e+07	9.9163e+07	6.14333e+07	5.15583e+07	7.69041e+07	8.18161e+07	4.3583e+07	8.6202e+07	4.41214e+07	8.4138e+07	5.07303e+07	4.6978e+07	4.58646e+07	5.47312e+07	5.78278e+07	5.10844e+07	8.30235e+07	8.46378e+07	4.96277e+07
(5E)-6,10-dimethyl-5,9-undecadien-2-one	2.62	level2			217.158	232.3	POS	2.8567e+07	2.87636e+07	2.34558e+07	2.60625e+07	2.50399e+07	3.04452e+07	7.6801e+07	2.97836e+07	3.21227e+07	6.57649e+07	3.11575e+07	3.15923e+07	31036967	3.02746e+07	6.16491e+07	3.10064e+07	2.84004e+07	7.88644e+07	3.25025e+07	3.62802e+07	7.74567e+07	3.26646e+07	3.41096e+07	3.53022e+07	6.56552e+07	2.93057e+07	3.15254e+07	3.09849e+07
Protostemotinine	2.62	level2			416.197	219.2	POS	822848	1.24216e+06	1.04605e+06	1.01383e+06	990495	990590	659147	683324	1.02234e+06	926255	543213	1.08437e+06	1.48955e+07	7.49478e+06	9.3204e+06	1.14834e+07	8.96357e+06	9.26326e+06	1.174e+06	2.23204e+06	1.35768e+06	2.16431e+06	1.97641e+06	947579	3.5689e+06	3.31247e+06	3.03481e+06	3.1474e+06
((6aR,9R,10aR)-7-methyl-4,6,6a,7,8,9,10,10a-octahydroindolo[4,3-fg]quinolin-9-yl)methanol	2.62	level2			279.149	205.2	POS	4.29943e+06	6.15424e+06	4.01707e+06	5.12983e+06	3.57137e+06	4.04343e+06	1.96873e+06	3.66408e+06	2.52155e+06	4.06237e+06	1.81777e+06	2.3348e+06	1.50195e+07	1.11116e+07	1.27119e+07	1.69428e+07	1.338e+07	1.31684e+07	2.8924e+06	4.17667e+06	2.95232e+06	3.67669e+06	3.31227e+06	2.31458e+06	6.18719e+06	6.67753e+06	6.91139e+06	5.58431e+06
agnuside	2.62	level2			465.144	184.3	NEG	6.67791e+07	4.47558e+07	5.2363e+07	5.0786e+07	5.91449e+07	7.00101e+07	4.61047e+07	5.0779e+07	3.18457e+07	4.08971e+07	5.58191e+07	4.44583e+07	5.30924e+07	4.02178e+07	4.7548e+07	5.78889e+07	4.26651e+07	4.83492e+07	4.1566e+07	6.09425e+07	4.69433e+07	4.6017e+07	4.63777e+07	4.68758e+07	4.95474e+07	5.14154e+07	4.95234e+07	5.06274e+07
phorbol_13-acetate	2.62	level2			407.206	178.8	POS	7.95498e+06	6.09105e+06	6.62086e+06	6.55702e+06	4.13188e+06	7.02354e+06	3.58452e+06	3.16596e+06	2.55409e+06	3.11475e+06	3.01659e+06	3.76655e+06	4.76519e+06	5.5221e+06	5.61229e+06	7.05347e+06	4.4186e+06	5.14651e+06	3.51577e+06	7.13638e+06	5.79559e+06	5.3175e+06	5.45881e+06	2.6569e+06	6.36132e+06	5.12994e+06	5.24878e+06	5.62142e+06
14,15beta-Dihydroxyklaineanone	2.62	level2			419.157	57.6	POS	0	839236	437380	673807	515218	210863	0	110160	0	187746	0	0	884596	843980	839970	2.69091e+06	451881	1.89649e+06	490738	419631	765744	350800	138322	756057	274308	295515	441918	832804
Pentadecadienoylcarnitine	2.62	level2			382.294	284.2	POS	6.89745e+06	8.47372e+06	3.86368e+06	4.69527e+06	3.26013e+06	6.23325e+06	2.66401e+06	2.8056e+06	2.98746e+06	5.00633e+06	2.45289e+06	2.20686e+06	2.14276e+07	1.6489e+07	1.85896e+07	1.97224e+07	1.73734e+07	1.57014e+07	5.37216e+06	8.69396e+06	6.87895e+06	7.79884e+06	8.45594e+06	4.44284e+06	9.04083e+06	7.61132e+06	8.28424e+06	8.5725e+06
Dihydroisoalantolactone	2.61	level2			235.169	232.3	POS	6.85898e+07	7.0479e+07	5.32023e+07	6.1725e+07	5.79337e+07	7.45663e+07	1.04044e+08	6.36524e+07	6.85221e+07	6.30852e+07	7.85745e+07	6.24058e+07	8.53433e+07	8.19566e+07	8.72075e+07	9.0189e+07	8.20416e+07	7.77095e+07	9.13611e+07	1.03203e+08	1.23457e+08	9.59535e+07	9.30725e+07	9.22591e+07	7.91906e+07	7.62844e+07	8.30306e+07	8.3098e+07
Sterebin_A	2.61	level2			311.222	227.6	POS	8.90399e+06	9.14007e+06	6.8842e+06	9.79271e+06	1.12608e+07	4.15166e+06	1.011e+07	6.623e+06	1.23909e+07	1.73746e+07	9.53037e+06	1.16502e+07	1.5772e+07	8.22019e+06	9.40572e+06	7.86981e+06	9.99003e+06	8.69891e+06	1.28677e+07	7.61604e+06	9.75091e+06	1.0932e+07	1.05522e+07	1.09429e+07	9.58707e+06	1.04683e+07	8.67636e+06	1.58574e+07
FA 9:1+1O	2.61	level2			171.103	218.7	NEG	2.60885e+07	2.25989e+07	1.94411e+07	2.61384e+07	2.86238e+07	2.1604e+07	3.96515e+07	2.75663e+07	2.48923e+07	2.5493e+07	2.59174e+07	2.32809e+07	2.09434e+07	2.06654e+07	2.51724e+07	2.07608e+07	2.32661e+07	2.53774e+07	2.17157e+07	2.14541e+07	2.68558e+07	2.03146e+07	2.72209e+07	2.52329e+07	2.6654e+07	2.37763e+07	2.13681e+07	2.04718e+07
Chalcomoracin	2.61	level2			649.239	174.8	POS	1.01773e+06	935314	843444	879300	1.02589e+06	497149	1.90094e+06	1.23044e+06	1.09575e+06	630910	1.19035e+06	661412	587799	364967	554113	680647	687842	117245	740113	865691	523172	398730	450486	850019	391847	831625	683449	729290
L-2-Amino-3-(4-aminophenyl)propanoic_acid	2.61	level2			181.097	164	POS	2.55419e+06	3.65735e+06	2.88486e+06	3.02517e+06	4.23823e+06	2.94971e+06	3.12538e+06	3.24351e+06	3.51597e+06	2.85533e+06	2.59913e+06	3.54744e+06	2.80973e+06	4.09992e+06	3.86511e+06	4.47884e+06	3.24554e+06	4.86957e+06	4.463e+06	4.07113e+06	4.14457e+06	3.46428e+06	4.18452e+06	3.09648e+06	3.98939e+06	3.32094e+06	3.62004e+06	4.00368e+06
Artocaprin	2.61	level2			435.186	155.6	NEG	1.09988e+09	1.13793e+09	1.10979e+09	1.13042e+09	1.02261e+09	1.04562e+09	1.34723e+09	1.32294e+09	1.44093e+09	1.22907e+09	1.30913e+09	9.24249e+08	1.10824e+09	1.01991e+09	1.0694e+09	1.11045e+09	9.01898e+08	9.82853e+08	1.22642e+09	1.37231e+09	1.48128e+09	1.49047e+09	1.34429e+09	1.35055e+09	1.25233e+09	1.2054e+09	1.20774e+09	1.21918e+09
Artonol_C	2.61	level2			501.188	151.1	POS	6.69696e+06	6.84762e+06	6.0052e+06	4.43501e+06	6.95333e+06	8.61021e+06	8.50472e+06	4.6345e+06	1.15516e+07	9.7338e+06	1.11944e+07	4.7396e+06	1.00485e+07	2.54165e+06	3.19732e+06	2.65439e+06	3.33804e+06	4.04034e+06	5.104e+06	7.20208e+06	3.84879e+06	4.31451e+06	4.40387e+06	5.18654e+06	5.66325e+06	5.90442e+06	5.48033e+06	5.34279e+06
epicatechin	2.61	level2			291.092	20.1	POS	1.84771e+06	818654	667198	1.58998e+06	1.07443e+06	1.19956e+06	837158	1.05088e+06	827033	1.01531e+06	1.10897e+06	578764	812171	3.68613e+06	1.25025e+06	1.08126e+06	1.85397e+06	1.34559e+06	1.14961e+06	960457	1.28479e+06	427924	1.08472e+06	1.05073e+06	960054	1.20197e+06	1.02661e+06	776071
Salsoline	2.61	level2			194.118	188.6	POS	1.48323e+07	5.32753e+06	5.28939e+06	5.81161e+06	7.75857e+06	5.1586e+06	4.78404e+06	4.00562e+06	3.97322e+06	5.11878e+06	6.10411e+06	4.63138e+06	6.36958e+06	7.20125e+06	6.77148e+06	6.48242e+06	6.29797e+06	6.66306e+06	5.83675e+06	4.77985e+06	4.0595e+06	4.72512e+06	6.28911e+06	4.62904e+06	5.66462e+06	5.51685e+06	6.7245e+06	4.5937e+06
Lusitanicoside	2.61	level2			441.177	185	NEG	5.25071e+07	4.44829e+07	4.06318e+07	4.53941e+07	8.6382e+07	4.88733e+07	8.93962e+07	6.24569e+07	6.56199e+07	6.18414e+07	4.46093e+07	5.15184e+07	3.1575e+07	3.47068e+07	3.49243e+07	3.19812e+07	2.67387e+07	2.64539e+07	4.618e+07	8.89881e+07	4.90463e+07	4.37064e+07	1.05364e+08	9.34713e+07	4.38043e+07	4.29222e+07	5.41798e+07	9.17721e+07
Echinenone	2.61	level2			551.425	319.7	POS	4.74346e+08	5.93341e+08	5.34385e+08	6.26194e+08	3.91739e+08	5.42316e+08	4.51276e+08	5.77212e+08	4.66233e+08	5.94381e+08	5.4613e+08	4.54877e+08	3.83946e+08	3.20206e+08	4.21677e+08	6.36525e+08	4.83245e+08	4.82671e+08	5.12636e+08	4.45871e+08	4.6441e+08	4.53562e+08	4.45265e+08	3.83167e+08	4.80485e+08	5.59873e+08	7.25869e+08	4.8781e+08
Chrysanthemic Acid, Ethyl Ester	2.61	level2			195.139	249.7	NEG	2.20761e+07	2.72728e+07	2.92321e+07	2.83131e+07	3.26987e+07	3.00389e+07	2.49952e+07	3.01943e+07	2.91265e+07	2.64426e+07	2.60755e+07	3.09541e+07	2.83811e+07	2.90334e+07	2.90184e+07	3.16631e+07	2.87264e+07	3.35005e+07	3.14591e+07	2.74194e+07	2.27619e+07	3.18558e+07	3.50854e+07	2.45788e+07	1.6863e+07	1.67487e+07	1.70365e+07	1.60195e+07
3-(4-hydroxy-3-methoxyphenyl)propyl 3-(4-hydroxyphenyl)propanoate	2.61	level2			331.154	191.8	POS	1.51845e+07	1.18551e+07	1.68323e+07	1.4779e+07	1.83489e+07	1.24182e+07	2.04321e+07	1.83913e+07	1.84121e+07	1.64432e+07	2.0344e+07	1.4986e+07	1.02072e+07	1.29387e+07	1.80377e+07	1.01262e+07	1.44797e+07	1.50127e+07	1.2423e+07	1.5108e+07	9.83102e+06	9.76097e+06	1.1544e+07	9.43269e+06	1.28361e+07	1.42428e+07	1.51775e+07	1.41987e+07
2-[3-[2-(1,3-benzodioxol-5-yl)-7-methoxy-1-benzofuran-5-yl]-3-hydroxypropoxy]-6-(hydroxymethyl)oxane-3,4,5-triol	2.61	level2			503.157	200.2	NEG	8.00793e+06	9.65817e+06	1.32655e+07	1.17068e+07	1.12615e+07	1.16969e+07	7.21657e+06	1.1157e+07	5.95866e+06	1.17336e+07	7.23224e+06	7.90814e+06	1.17784e+07	1.06233e+07	1.16761e+07	1.04683e+07	9.08537e+06	1.06307e+07	1.52569e+07	1.60677e+07	1.92451e+07	1.30688e+07	9.59667e+06	1.46616e+07	1.13226e+07	1.04523e+07	1.1041e+07	1.19793e+07
Vernoflexuoside	2.61	level2			409.186	148.1	POS	2.32263e+06	2.17195e+06	1.34782e+06	1.86153e+06	1.29273e+06	2.30155e+06	351478	410983	1.13795e+06	767350	930037	643160	9.66372e+06	6.95191e+06	7.7408e+06	9.49494e+06	7.23972e+06	7.85449e+06	1.42867e+06	3.04336e+06	2.10782e+06	1.31454e+06	2.44836e+06	1.11635e+06	3.98486e+06	4.4976e+06	901233	3.06039e+06
Neotussilagolactone	2.6	level2			345.207	352	POS	3.21401e+06	1.97914e+06	751937	2.29713e+06	2.10854e+06	1.10078e+06	2.17837e+06	2.20783e+06	2.96047e+06	1.08161e+06	1.02037e+06	530133	630123	2.31837e+06	2.74243e+06	2.27692e+06	2.04606e+06	3.16624e+06	2.29693e+06	2.21385e+06	2.37032e+06	2.73898e+06	2.09407e+06	831428	2.36603e+06	1.05903e+06	1.8529e+06	1.09847e+06
Nb-Stearoyltryptamine	2.6	level2			427.368	318.4	POS	2.62973e+07	2.80611e+07	1.50425e+07	1.83627e+07	1.77041e+07	1.88605e+07	1.19533e+07	1.27432e+07	1.04813e+07	1.4889e+07	1.17821e+07	1.25591e+07	6.12202e+07	5.87552e+07	7.4103e+07	5.50325e+07	6.72535e+07	5.86571e+07	1.89257e+07	2.41689e+07	2.89562e+07	2.53738e+07	2.64871e+07	1.84055e+07	3.45773e+07	2.70823e+07	2.64315e+07	3.93079e+07
[truncated: 22,144 more rows]
