# Supplementary material for: Application of starch-degradation bacteria in cigar tobacco leaf fermentation: effects on starch degradation, microbial communities and metabolic pathways
Source: Front Microbiol. 2025 Jul 21;16:1632731. doi: 10.3389/fmicb.2025.1632731 (PMC12319561; doi:10.3389/fmicb.2025.1632731)
Supplement: Supplementary file 4 [file Table_4.XLS]

#KO	EC number	CK1_M	CK2_M	CK3_M	DX1_M	DX2_M	DX3_M	BLS1_M	BLS2_M	BLS3_M	DX_BLS1M	DX_BLS2M	DX_BLS3M
K00844	2.7.1.1	82	208	104	48	18	56	3062	11270	6474	118	266	138	21844
K00847	2.7.1.4	298	234	214	1554	1258	3196	1044	3546	1524	8382	4406	12136	50660
K02810	2.7.1.211	192	178	226	2424	1932	4612	1334	3600	2084	13048	8500	21156	75868
K02819	2.7.1.201	190	92	130	1226	1202	2410	1210	3248	1510	3516	1722	4578	21034
K02791	2.7.1.208	354	78	166	1266	1170	2496	1088	3064	1458	268	388	240	12036
K02750	2.7.1.175	270	172	290	2078	1864	4182	1860	5774	2962	302	384	198	20336
K01193	3.2.1.26	256	190	130	1316	1076	2986	1632	5506	2774	6074	4782	10134	52722
K01187	3.2.1.20	438	240	110	484	600	1146	2546	12274	7230	444	476	354	51410
K01203	3.2.1.48	0	0	0	0	0	0	0	4	0	0	0	0	4
K01212	3.2.1.65	0	6	0	8	2	10	0	56	140	2	0	2	226
K19892	3.2.1.39	0	0	0	0	0	0	10	10	0	14	0	0	34
K01210	3.2.1.58	298	114	176	92	42	282	3192	12134	5866	148	406	224	22974
K05349	3.2.1.21	956	252	402	1082	1084	2386	4404	17928	9486	3544	1802	2748	84054
K01179	3.2.1.4	78	40	38	360	264	790	486	2722	1764	4580	3632	7554	22308
K01225	3.2.1.91	24	2	6	290	256	656	188	1234	572	2128	1738	4402	11496
K01223	3.2.1.86	374	198	314	4938	3958	9856	2344	7678	4296	54042	25840	67864	215658
K01232	3.2.1.122	0	0	0	4	6	0	4	46	220	326	454	328	1388
K01226	3.2.1.93	104	68	202	1126	910	2058	1660	6276	7214	3364	1942	4674	49216
K22934	3.2.1.28	28	24	94	8	8	52	584	2438	1590	58	86	38	5008
K07405	3.2.1.1	0	0	0	0	0	0	0	24	0	0	0	0	24
K01177	3.2.1.2	0	0	22	0	2	2	10	68	4	8	0	0	116
K01178	3.2.1.3	168	52	116	54	26	106	1070	4056	2004	78	184	22	7936
K01182	3.2.1.10	0	0	0	10	6	4	40	376	194	8	14	8	660
K05988	3.2.1.11	32	0	0	0	0	0	12	0	28	0	0	0	72
K01236	3.2.1.141	0	0	0	0	0	0	16	38	16	0	4	0	74
K00696	2.4.1.14	0	0	0	0	0	0	0	2	0	0	0	0	2
K00695	2.4.1.13	0	0	0	0	0	0	0	4	36	0	0	0	40
K00692	2.4.1.10	0	0	0	6	0	6	6	14	138	10	0	2	182
K00702	2.4.1.20	14	0	0	0	0	0	34	274	158	0	0	0	480
K00690	2.4.1.7	0	0	10	4	0	0	0	78	60	0	0	0	152
K00706	2.4.1.34	0	0	16	0	8	14	178	312	190	10	34	4	766
K00694	2.4.1.12	32	2	0	246	194	528	4	72	124	8330	3154	8136	20822
K00697	2.4.1.15	10760	11200	12966	14142	11388	10384	12616	13126	10144	7828	9520	7454	238254
K13057	2.4.1.245	0	0	0	0	0	0	16	0	18	0	0	0	34
K05342	2.4.1.64	0	0	10	0	0	0	14	70	38	0	0	0	132
K00693	2.4.1.11	48	20	4	4	0	4	30	62	28	0	6	0	206
K00701	2.4.1.19	0	0	0	0	0	0	0	208	12	0	0	0	220
K00703	2.4.1.21	54	60	6	6	4	6	34	148	46	58	64	50	536
K00688	2.4.1.1	64	36	52	10	6	6	46	466	320	40	78	40	1164
K16148	2.4.1.342	80	0	0	258	252	422	4	80	58	26	18	2	1200
K00700	2.4.1.18	78	138	84	8	10	14	230	916	676	60	74	94	2382
K00691	2.4.1.8	0	0	0	0	0	4	20	274	252	0	0	4	554
K00705	2.4.1.25	0	6	0	0	0	4	0	158	6	0	0	0	174
K06859	5.3.1.9	18	0	0	0	0	0	0	52	118	88	22	44	342
K01835	5.4.2.2	222	196	186	1138	898	2174	1616	5094	3022	4694	2202	6056	42044
K01087	3.1.3.12	6266	6426	7720	8200	7170	6048	6054	2472	4354	4890	5226	4220	123756
K01838	5.4.2.6	0	0	0	2	2	0	12	304	184	30	46	20	600
K16147	2.4.99.15	10	0	0	0	0	0	12	158	4	2	8	2	196
K06044	5.4.99.15	0	0	0	0	0	0	0	0	6	0	12	2	20
K05343	5.4.99.16	10	2	2	4	0	0	0	2	100	58	12	6	196
K06896	3.1.3.90	0	0	0	6	0	18	2	2	66	0	2	0	96
