# Supplementary material for: Application of starch-degradation bacteria in cigar tobacco leaf fermentation: effects on starch degradation, microbial communities and metabolic pathways
Source: Front Microbiol. 2025 Jul 21;16:1632731. doi: 10.3389/fmicb.2025.1632731 (PMC12319561; doi:10.3389/fmicb.2025.1632731)
Supplement: Supplementary file 5 [file Table_5.XLSX]

## Sheet: Sheet1
EC number	CK1	CK2	CK3	DX1	DX2	DX3	BLS1	BLS2	BLS3	DX_BLS1	DX_BLS2	DX_BLS3
EC 2.7.1.1	184	302	30	2020	278	202	2214	1944	2780	2022	1012	3296
EC 2.7.1.201	5880	6380	3602	6734	1334	2830	5702	4380	5234	3300	1464	3226
(K02791)EC 2.7.1.208	138	220	2	1022	110	360	7046	5030	7562	22	106	76
(K20108)EC 2.7.1.208	0	0	0	0	0	0	22	24	16	70	64	146
EC 2.7.1.175	372	248	114	3320	770	2016	11042	7906	9416	94	126	144
(K12316)EC 3.2.1.20	0	0	0	0	0	2	10	12	58	124	0	128
(K01187)EC 3.2.1.20	560	356	108	6944	8714	2142	6764	3478	6772	786	2472	1330
EC 3.2.1.65	2	0	0	3708	200	2652	76	90	24	4	16	74
(K01199)EC 3.2.1.39	192	0	0	0	0	760	136	68	56	0	0	0
(K19892)EC 3.2.1.39	0	8	0	0	2	0	0	0	0	0	0	0
EC 3.2.1.58	160	454	90	1384	446	2348	5072	2304	7808	528	1224	2204
(K05350)EC 3.2.1.21	154	8	156	1768	5376	12864	44	172	198	764	760	86
(K05349)EC 3.2.1.21	3950	4246	2444	5060	11564	2330	13718	9536	16128	4094	1252	4142
(K01188)EC 3.2.1.21	28	0	0	244	96	266	392	182	696	0	0	0
(K01179)EC 3.2.1.4	21420	23360	14884	20012	7294	14782	1540	2614	2580	9968	5334	7362
(K20542)EC 3.2.1.4	4	0	124	338	138	8	0	0	4	10	2	0
(K19357)EC 3.2.1.4	0	0	0	0	0	0	56	64	82	32	0	0
(K19668)EC 3.2.1.91	8138	9626	5324	4684	1840	2274	540	710	712	11840	5496	10128
(K01225)EC 3.2.1.91	2	8	0	10	88	20	248	136	894	2	30	624
EC 3.2.1.122	0	36	0	1574	268	986	32	30	70	76	78	204
EC 3.2.1.93	4016	5678	2380	7520	1842	4188	4522	3278	4348	4286	2926	4332
(K22934)EC 3.2.1.28	8	8	154	782	226	342	294	132	476	538	230	224
EC 3.2.1.28	2	48	6	274	380	830	598	374	796	534	16	156
EC 3.2.1.54	306	224	720	5250	2054	4732	1122	992	938	810	1458	518
EC 3.2.1.1	0	0	0	0	378	146	0	0	0	28	72	48
EC 3.2.1.2	0	0	0	48	32	94	2	0	14	28	10	40
EC 3.2.1.133	306	224	720	5250	2054	4732	1122	992	938	810	1458	518
(K21574)EC 3.2.1.3	18	0	4	0	336	0	146	426	2	128	38	36
(K01178)EC 3.2.1.3	188	50	180	216	232	532	2010	1594	2800	1422	1204	532
EC 3.2.1.10	0	34	0	11632	1638	5678	1024	604	1574	94	62	118
EC 3.2.1.11	0	0	16	0	0	0	30	0	102	0	36	0
EC 3.2.1.141	48	46	0	46	806	12	0	0	2	26	0	26
EC 2.4.1.14	0	0	18	20	680	1196	0	46	2	0	48	0
EC 2.4.1.13	0	0	0	0	118	478	0	0	0	0	4	0
EC 2.4.1.10	46	0	0	4410	230	1630	20	2	74	36	4	34
EC 2.4.1.20	0	162	0	190	204	4	50	144	8	364	54	118
EC 2.4.1.7	0	0	0	0	0	562	28	40	60	186	78	146
EC 2.4.1.34	4	12	10	472	4	30	574	132	100	276	0	40
EC 2.4.1.12	8992	12048	7328	10468	2308	4640	164	860	756	7976	5008	6866
(K00697)EC 2.4.1.15	1222	2460	5074	2688	450	3164	8402	7034	7820	5760	9226	3662
(K16055)EC 2.4.1.15	56	6	0	868	914	210	384	132	752	928	178	4
EC 2.4.1.245	0	0	0	0	172	0	0	0	74	0	0	0
EC 2.4.1.64	0	0	0	52	0	18	0	240	20	0	0	0
(K16150)EC 2.4.1.11	2170	4722	15962	2936	4538	1680	18822	17816	16560	11598	21244	5696
(K00693)EC 2.4.1.11	0	0	0	2	220	0	160	14	192	4	2	46
EC 2.4.1.19	0	2	0	22	102	50	18	16	0	0	0	62
EC 2.4.1.21	22	108	62	7086	4096	3290	64	372	552	1278	466	408
EC 2.4.1.1	12	204	138	10948	4368	3400	506	714	1120	578	218	286
EC 2.4.1.342	12	0	28	9340	5138	3458	224	424	108	2574	286	702
(K00700)EC 2.4.1.18	60	386	330	3764	7698	2188	438	836	292	1042	238	314
(K16149)EC 2.4.1.18	0	68	0	104	1170	0	60	182	18	12	74	146
EC 2.4.1.8	0	436	0	6324	1396	5306	198	1318	0	40	0	56
(K00705)EC 2.4.1.25	78	0	4	578	1850	0	126	334	136	90	80	176
(K22451)EC 2.4.1.25	0	0	0	8	302	0	0	0	0	68	0	8
(K01810)EC 5.3.1.9	13416	13948	17394	8322	13156	3554	17626	14022	14392	17268	21400	13180
(K15916)EC 5.3.1.9	0	6	24	166	878	516	0	38	0	0	20	48
(K13810)EC 5.3.1.9	0	0	0	96	264	0	0	0	34	32	170	0
(K06859)EC 5.3.1.9	0	0	0	0	0	0	0	0	0	0	16	0
(K15778)EC 5.4.2.2	1164	1426	6108	532	944	88	9558	6710	6606	3730	10496	3692
(K15779)EC 5.4.2.2	4	0	0	0	0	0	0	6	0	16	4	2
(K01835)EC 5.4.2.2	10658	12126	6036	7424	4198	3030	6150	4588	6858	7786	3706	5718
(K01087)EC 3.1.3.12	618	928	3090	396	142	610	3982	3378	3338	2132	4506	1290
(K16055)EC 3.1.3.12	56	6	0	868	914	210	384	132	752	928	178	4
EC 5.4.2.6	16	300	0	5442	1598	2950	90	170	158	74	12	174
EC 2.4.99.16	70	426	42	216	2440	14	84	484	62	246	14	112
EC 5.4.99.15	78	0	0	72	112	0	0	22	0	44	0	460
EC 5.4.99.16	6	0	2	332	18	2	24	48	72	414	2	20
EC 3.1.3.90	0	0	0	0	70	0	0	8	4	94	64	62
EC 2.7.7.27	18	186	58	8334	3624	5094	102	244	134	308	470	636
